# Supplementary material for: Abnormal Peripheral Neutrophil Transcriptome in Newly Diagnosed Type 2 Diabetes Patients
Source: J Diabetes Res. 2020 Apr 22;2020:9519072. doi: 10.1155/2020/9519072 (PMC7195634; doi:10.1155/2020/9519072)
Supplement: Supplementary 1 — Supplementary Data 1: information of DEGs including gene ID, expression, and log2 ratio (T2D/HC). [file 9519072.f1.xls]

## Sheet: HC-VS-T2D.DEGseq_Method.GeneDif
GeneID	Length	HC-Expression	T2D-Expression	log2Ratio(T2D/HC)	q-value(Storey et al. 2003)	Up-Down-Regulation(T2D/HC)	p-value	Symbol	Cellular Component	Molecular Function	Biological Process	Kegg Orthology	Nr Description
101060389	2065	0	982.08	10.7956	7.34347e-137	Up	4.14782e-137	LOC101060389	GO:0044464//cell part	NA	NA	K20134//TBC1 domain family member 3	gi|612339302|ref|NP_001278394.1|//TBC1 domain family member 3D [Homo sapiens]
10917	2454	1.1	1346.93	10.1139	1.30805e-207	Up	5.85182e-208	BTNL3	GO:0031224//intrinsic component of membrane	NA	GO:0044238//primary metabolic process	K06712//butyrophilin	gi|37574624|ref|NP_932079.1|//butyrophilin-like protein 3 precursor [Homo sapiens]
84218	2079	0	177.92	8.331	3.73388e-36	Up	4.07323e-36	TBC1D3F	GO:0044464//cell part	NA	NA	K20134//TBC1 domain family member 3	gi|612339308|ref|NP_115634.3|//TBC1 domain family member 3F [Homo sapiens]
100861412	5418	0	173.45	8.29429	2.0089e-35	Up	2.20615e-35	FSBP	GO:0043231//intracellular membrane-bounded organelle	GO:0003677//DNA binding;GO:0032559//adenyl ribonucleotide binding;GO:0004386//helicase activity	GO:0000725//recombinational repair;GO:0009314//response to radiation;GO:0042221//response to chemical	K15289//solute carrier family 35, member F5;K17985//activating molecule in BECN1-regulated autophagy protein 1;K10877//DNA repair and recombination protein RAD54B [EC:3.6.4.-]	gi|371502131|ref|NP_001243070.1|//fibrinogen silencer-binding protein [Homo sapiens]
729877	2135	0	154.73	8.12952	2.55089e-32	Up	2.91677e-32	TBC1D3H	GO:0044464//cell part	NA	NA	K20134//TBC1 domain family member 3	gi|530788274|ref|NP_001116864.3|//TBC1 domain family member 3H [Homo sapiens]
1268	5387	0	110	7.63727	1.5402e-24	Up	1.97795e-24	CNR1	GO:0016021//integral component of membrane	GO:0005488//binding;GO:0004930//G-protein coupled receptor activity	GO:0008217//regulation of blood pressure;GO:0014073//response to tropane;GO:0050795//regulation of behavior;GO:0007600//sensory perception;GO:0048232//male gamete generation;GO:0002237//response to molecule of bacterial origin;GO:0030073//insulin secretion;GO:0043900//regulation of multi-organism process;GO:0050804//modulation of chemical synaptic transmission;GO:0006635//fatty acid beta-oxidatio…	K04277//cannabinoid receptor 1	gi|38683844|ref|NP_057167.2|//cannabinoid receptor 1 isoform a [Homo sapiens];gi|237681065|ref|NP_149421.2|//cannabinoid receptor 1 isoform b [Homo sapiens]
2838	2781	0	49	6.47062	9.98039e-13	Up	1.66228e-12	GPR15	GO:0016021//integral component of membrane	GO:0001595//angiotensin receptor activity;GO:0001608//G-protein coupled nucleotide receptor activity	GO:0035588//G-protein coupled purinergic receptor signaling pathway	K08403//G protein-coupled receptor 15	gi|4885299|ref|NP_005281.1|//G-protein coupled receptor 15 [Homo sapiens]
51176	2660	4	257	5.86154	1.66169e-59	Up	1.4228e-59	LEF1	GO:0043231//intracellular membrane-bounded organelle;GO:0043234//protein complex	GO:0003707//steroid hormone receptor activity;GO:0035258//steroid hormone receptor binding;GO:0019904//protein domain specific binding;GO:0043565//sequence-specific DNA binding;GO:0044212//transcription regulatory region DNA binding;GO:0004869//cysteine-type endopeptidase inhibitor activity;GO:0001071//null	GO:0016477//cell migration;GO:0030178//negative regulation of Wnt signaling pathway;GO:0007162//negative regulation of cell adhesion;GO:0001503//ossification;GO:0016049//cell growth;GO:0043921//modulation by host of viral transcription;GO:0002763//positive regulation of myeloid leukocyte differentiation;GO:0032091//negative regulation of protein binding;GO:0001818//negative regulation of cytokine…	K04492//lymphoid enhancer-binding factor 1	gi|694908428|ref|XP_009446383.1|//PREDICTED: lymphoid enhancer-binding factor 1 isoform X2 [Pan troglodytes];gi|694908445|ref|XP_009446390.1|//PREDICTED: lymphoid enhancer-binding factor 1 isoform X12 [Pan troglodytes];gi|694908426|ref|XP_009446382.1|//PREDICTED: lymphoid enhancer-binding factor 1 isoform X1 [Pan troglodytes]
6557	4717	31	1910	5.80107	0	Up	0	SLC12A1	GO:0031224//intrinsic component of membrane;GO:0044459//plasma membrane part	GO:0015377//cation:chloride symporter activity	GO:0042592//homeostatic process;GO:0048513//animal organ development;GO:0003008//system process;GO:0030001//metal ion transport;GO:0015698//inorganic anion transport	K14425//solute carrier family 12 (sodium/potassium/chloride transporter), member 1	gi|296317278|ref|NP_001171761.1|//solute carrier family 12 member 1 isoform F [Homo sapiens];gi|134254459|ref|NP_000329.2|//solute carrier family 12 member 1 isoform A [Homo sapiens]
4753	3210	3	175	5.72216	3.76611e-41	Up	3.86074e-41	NELL2	NA	GO:0046872//metal ion binding	GO:0050789//regulation of biological process;GO:0009987//cellular process	K01482//dimethylargininase [EC:3.5.3.18];K17307//fibulin 1/2	gi|223029474|ref|NP_001138581.1|//protein kinase C-binding protein NELL2 isoform c precursor [Homo sapiens];gi|223029470|ref|NP_001138579.1|//protein kinase C-binding protein NELL2 isoform a [Homo sapiens]
100528032	1947	0	28.13	5.66995	3.65845e-08	Up	7.23963e-08	KLRC4-KLRK1	NA	NA	NA	K06728//killer cell lectin-like receptor subfamily K member 1	gi|169234653|ref|NP_031386.2|//NKG2-D type II integral membrane protein [Homo sapiens]
100527949	1922	1.35	72.95	5.61179	2.96978e-18	Up	4.31874e-18	GIMAP1-GIMAP5	GO:0031224//intrinsic component of membrane;GO:0031966//mitochondrial membrane	GO:0032561//guanyl ribonucleotide binding	GO:0001773//myeloid dendritic cell activation;GO:0002361//CD4-positive, CD25-positive, alpha-beta regulatory T cell differentiation;GO:0002370//natural killer cell cytokine production;GO:0007006//mitochondrial membrane organization;GO:0006915//apoptotic process;GO:0010522//regulation of calcium ion transport into cytosol;GO:0009895//negative regulation of catabolic process;GO:0031327//negative re…	NA	gi|746816627|ref|NP_001290559.1|//GIMAP1-GIMAP5 protein isoform b [Homo sapiens];gi|313760638|ref|NP_001186506.1|//GIMAP1-GIMAP5 protein isoform a [Homo sapiens]
57692	3714	0	26	5.55635	1.12701e-07	Up	2.28691e-07	MAGEE1	GO:0043231//intracellular membrane-bounded organelle;GO:0016020//membrane;GO:0043234//protein complex;GO:0044444//cytoplasmic part;GO:0043005//neuron projection	NA	NA	K12464//melanoma-associated antigen D1	gi|20143482|ref|NP_065983.1|//melanoma-associated antigen E1 [Homo sapiens]
283652	1617	0	25.52	5.52947	1.45457e-07	Up	2.96915e-07	SLC24A5	GO:0031224//intrinsic component of membrane;GO:0048770//pigment granule	GO:0015291//secondary active transmembrane transporter activity;GO:0015081//sodium ion transmembrane transporter activity	GO:0070838//divalent metal ion transport	K13753//solute carrier family 24 (sodium/potassium/calcium exchanger), member 5	gi|45504369|ref|NP_995322.1|//sodium/potassium/calcium exchanger 5 precursor [Homo sapiens]
57282	5580	1	44	5.31535	1.10406e-11	Up	1.89472e-11	SLC4A10	GO:0031224//intrinsic component of membrane	GO:0015301//anion:anion antiporter activity	GO:0030001//metal ion transport;GO:0015698//inorganic anion transport	K13861//solute carrier family 4 (sodium bicarbonate transporter), member 10	gi|731271938|ref|XP_010605142.1|//PREDICTED: sodium-driven chloride bicarbonate exchanger isoform X3 [Fukomys damarensis];gi|530370635|ref|XP_005246752.1|//PREDICTED: sodium-driven chloride bicarbonate exchanger isoform X9 [Homo sapiens];gi|731271940|ref|XP_010605143.1|//PREDICTED: sodium-driven chloride bicarbonate exchanger isoform X4 [Fukomys damarensis]
225	5341	0	22	5.31535	9.67459e-07	Up	2.05993e-06	ABCD2	GO:0044439//peroxisomal part;GO:0043234//protein complex;GO:0016021//integral component of membrane	GO:0032559//adenyl ribonucleotide binding;GO:0017111//nucleoside-triphosphatase activity	GO:0032787//monocarboxylic acid metabolic process;GO:0051234//establishment of localization	K05676//ATP-binding cassette, subfamily D (ALD), member 2	gi|9945308|ref|NP_005155.1|//ATP-binding cassette sub-family D member 2 [Homo sapiens]
92840	1554	0	19	5.10384	5.01724e-06	Up	1.11029e-05	REEP6	GO:0031224//intrinsic component of membrane	NA	NA	K17279//receptor expression-enhancing protein 5/6	gi|355702934|gb|EHH29425.1|//hypothetical protein EGK_09851, partial [Macaca mulatta];gi|119589897|gb|EAW69491.1|//receptor accessory protein 6, isoform CRA_a [Homo sapiens]
7789	5204	0	18.11	5.03463	8.21442e-06	Up	1.84206e-05	ZXDA	GO:0043231//intracellular membrane-bounded organelle	GO:0019904//protein domain specific binding;GO:0046914//transition metal ion binding;GO:0001071//null	GO:0010467//gene expression	K10485//BTB/POZ domain-containing protein 13 (germ cell-less protein-like 1)	gi|795099505|ref|XP_011829054.1|//PREDICTED: zinc finger X-linked protein ZXDB [Mandrillus leucophaeus]
29057	1839	0	17.81	5.01053	9.71087e-06	Up	2.18636e-05	FAM156A	GO:0016020//membrane;GO:0012505//endomembrane system	NA	NA	NA	gi|821037271|ref|XP_012354543.1|//PREDICTED: protein FAM156A/FAM156B isoform X1 [Nomascus leucogenys]
399697	2695	1	34	4.94338	2.54205e-09	Up	4.79039e-09	CTXN2	GO:0031224//intrinsic component of membrane	NA	NA	NA	gi|533122881|ref|XP_005376763.1|//PREDICTED: cortexin-2 [Chinchilla lanigera]
730262	785	0	12.82	4.93217	0.000133633	Up	0.000326067	PPIAL4E	GO:0044424//intracellular part	GO:0016859//cis-trans isomerase activity	GO:0044267//cellular protein metabolic process	K12738//peptidylprolyl cis-trans isomerase A-like 4 [EC:5.2.1.8]	gi|694987139|ref|XP_009438230.1|//PREDICTED: peptidyl-prolyl cis-trans isomerase A-like 4A/B/C, partial [Pan troglodytes]
728945	785	0	12.82	4.93217	0.000133633	Up	0.000326067	PPIAL4F	GO:0044424//intracellular part	GO:0016859//cis-trans isomerase activity	GO:0044267//cellular protein metabolic process	K12738//peptidylprolyl cis-trans isomerase A-like 4 [EC:5.2.1.8]	gi|694987139|ref|XP_009438230.1|//PREDICTED: peptidyl-prolyl cis-trans isomerase A-like 4A/B/C, partial [Pan troglodytes]
3003	1074	6	200	4.91481	1.13424e-45	Up	1.10664e-45	GZMK	NA	GO:0004175//endopeptidase activity	GO:0019538//protein metabolic process	K08663//granzyme K [EC:3.4.21.-]	gi|4504235|ref|NP_002095.1|//granzyme K precursor [Homo sapiens]
79071	3189	0	16	4.85591	2.666e-05	Up	6.19641e-05	ELOVL6	GO:0031227//intrinsic component of endoplasmic reticulum membrane	GO:0005488//binding;GO:0004312//fatty acid synthase activity	GO:0030497//fatty acid elongation;GO:0035336//long-chain fatty-acyl-CoA metabolic process;GO:0006641//triglyceride metabolic process;GO:0001676//long-chain fatty acid metabolic process	K10203//elongation of very long chain fatty acids protein 6 [EC:2.3.1.199]	gi|13129088|ref|NP_076995.1|//elongation of very long chain fatty acids protein 6 [Homo sapiens]
10223	2819	0	15	4.7628	4.68481e-05	Up	0.000110848	GPA33	GO:0016021//integral component of membrane	GO:0004871//signal transducer activity	NA	K06790//cell surface A33 antigen	gi|5031561|ref|NP_005805.1|//cell surface A33 antigen precursor [Homo sapiens]
4118	1027	4	119	4.75073	1.13778e-27	Up	1.39114e-27	MAL	GO:0043231//intracellular membrane-bounded organelle;GO:0044459//plasma membrane part;GO:0016021//integral component of membrane	GO:0016504//peptidase activator activity;GO:0005198//structural molecule activity;GO:0005488//binding;GO:0022803//passive transmembrane transporter activity	GO:0012502//induction of programmed cell death;GO:0008105//null;GO:0031580//membrane raft distribution;GO:0015031//protein transport;GO:0048869//cellular developmental process;GO:0008366//axon ensheathment	NA	gi|119631112|gb|EAX10707.1|//mal, T-cell differentiation protein, isoform CRA_b [Homo sapiens]
8745	6236	1	29	4.7139	4.08146e-08	Up	8.10002e-08	ADAM23	GO:0016021//integral component of membrane	GO:0004175//endopeptidase activity;GO:0046914//transition metal ion binding;GO:0005102//receptor binding	GO:0007399//nervous system development;GO:0019538//protein metabolic process;GO:0009987//cellular process	K06837//disintegrin and metalloproteinase domain-containing protein 23 [EC:3.4.24.-]	gi|4501913|ref|NP_003803.1|//disintegrin and metalloproteinase domain-containing protein 23 preproprotein [Homo sapiens]
8357	473	1	28	4.66327	7.14019e-08	Up	1.43342e-07	HIST1H3H	NA	NA	NA	K11253//histone H3	gi|880967054|ref|XP_012981125.1|//PREDICTED: LOW QUALITY PROTEIN: histone H3-like centromeric protein CSE4 [Mesocricetus auratus]
130399	8421	0	14	4.66327	8.28804e-05	Up	0.000199202	ACVR1C	GO:0031224//intrinsic component of membrane;GO:0043235//receptor complex	GO:0043169//cation binding;GO:0032559//adenyl ribonucleotide binding;GO:0017002//activin-activated receptor activity	GO:0009746//response to hexose;GO:0043434//response to peptide hormone;GO:0006915//apoptotic process;GO:0050796//regulation of insulin secretion;GO:0048869//cellular developmental process;GO:0010876//lipid localization;GO:0006464//cellular protein modification process;GO:0032501//multicellular organismal process	K13568//activin receptor type-1C [EC:2.7.11.30]	gi|829955128|ref|XP_012600738.1|//PREDICTED: activin receptor type-1C isoform X1 [Microcebus murinus];gi|161333833|ref|NP_660302.2|//activin receptor type-1C isoform 1 precursor [Homo sapiens];gi|161333839|ref|NP_001104503.1|//activin receptor type-1C isoform 4 precursor [Homo sapiens];gi|161333837|ref|NP_001104502.1|//activin receptor type-1C isoform 3 precursor [Homo sapiens]
100533496	2926	0	12.9	4.54521	0.000155767	Up	0.000381693	TVP23C-CDRT4	GO:0031224//intrinsic component of membrane	NA	NA	NA	gi|426384209|ref|XP_004058666.1|//PREDICTED: CMT1A duplicated region transcript 4 protein [Gorilla gorilla gorilla];gi|325121006|ref|NP_001191407.1|//uncharacterized protein LOC100533496 [Homo sapiens]
128178	2891	0	12.59	4.51012	0.000186063	Up	0.000458963	EDARADD	GO:0043231//intracellular membrane-bounded organelle;GO:0016020//membrane;GO:0043234//protein complex;GO:0030016//myofibril	GO:0004175//endopeptidase activity;GO:0046872//metal ion binding;GO:0016836//hydro-lyase activity;GO:0003712//transcription cofactor activity;GO:0003676//nucleic acid binding;GO:0001071//null	GO:0006357//regulation of transcription from RNA polymerase II promoter;GO:0006007//glucose catabolic process;GO:0048732//gland development;GO:0023052//signaling;GO:0051707//response to other organism;GO:0016049//cell growth;GO:0048869//cellular developmental process;GO:0042476//odontogenesis	K01689//enolase [EC:4.2.1.11]	gi|119590453|gb|EAW70047.1|//EDAR-associated death domain, isoform CRA_a [Homo sapiens]
9882	6254	3	72	4.44088	4.58947e-17	Up	6.85212e-17	TBC1D4	GO:0044424//intracellular part	NA	NA	K17902//TBC1 domain family member 4	gi|557786188|ref|NP_001273587.1|//TBC1 domain family member 4 isoform 2 [Homo sapiens];gi|557786174|ref|NP_001273588.1|//TBC1 domain family member 4 isoform 3 [Homo sapiens];gi|114688046|ref|NP_055647.2|//TBC1 domain family member 4 isoform 1 [Homo sapiens]
10290	10650	0	12	4.44088	0.000261586	Up	0.000652754	SPEG	GO:0043231//intracellular membrane-bounded organelle	GO:0032559//adenyl ribonucleotide binding;GO:0004672//protein kinase activity	GO:0048513//animal organ development;GO:0008283//cell proliferation;GO:0006464//cellular protein modification process;GO:0030154//cell differentiation	K08809//striated muscle-specific serine/threonine protein kinase [EC:2.7.11.1]	gi|119591154|gb|EAW70748.1|//aortic preferentially expressed gene 1, isoform CRA_g, partial [Homo sapiens];gi|157785645|ref|NP_005867.3|//striated muscle preferentially expressed protein kinase isoform 1 [Homo sapiens]
254042	3120	0	12	4.44088	0.000261586	Up	0.000652754	METAP1D	GO:0043231//intracellular membrane-bounded organelle	GO:0043169//cation binding;GO:0008237//metallopeptidase activity;GO:0008238//exopeptidase activity	GO:0018193//peptidyl-amino acid modification	K01265//methionyl aminopeptidase [EC:3.4.11.18]	gi|395857038|ref|XP_003800920.1|//PREDICTED: methionine aminopeptidase 1D, mitochondrial [Otolemur garnettii];gi|332815216|ref|XP_003309462.1|//PREDICTED: methionine aminopeptidase 1D, mitochondrial isoform X1 [Pan troglodytes];gi|585637601|ref|XP_006903838.1|//PREDICTED: LOW QUALITY PROTEIN: methionyl aminopeptidase type 1D (mitochondrial) [Elephantulus edwardii]
8969	498	0	11	4.31535	0.000468053	Up	0.00119085	HIST1H2AG	NA	NA	NA	K11251//histone H2A	gi|528754013|gb|EPY73672.1|//hypothetical protein CB1_002639014 [Camelus ferus]
1896	5281	0	11	4.31535	0.000468053	Up	0.00119085	EDA	GO:0031224//intrinsic component of membrane;GO:0043232//intracellular non-membrane-bounded organelle	GO:0005515//protein binding;GO:0032813//tumor necrosis factor receptor superfamily binding	GO:0002376//immune system process;GO:0051091//positive regulation of DNA binding transcription factor activity;GO:0009888//tissue development;GO:0023052//signaling;GO:0032501//multicellular organismal process;GO:0048869//cellular developmental process	K05480//ectodysplasin-A	gi|54112101|ref|NP_001005609.1|//ectodysplasin-A isoform 2 [Homo sapiens];gi|300796531|ref|NP_001005610.2|//ectodysplasin-A isoform 3 [Homo sapiens];gi|4503449|ref|NP_001390.1|//ectodysplasin-A isoform 1 [Homo sapiens];gi|54112109|ref|NP_001005613.1|//ectodysplasin-A isoform 6 [Homo sapiens];gi|300796551|ref|NP_001005612.2|//ectodysplasin-A isoform 5 [Homo sapiens]
10637	1644	0	11	4.31535	0.000468053	Up	0.00119085	LEFTY1	GO:0044421//extracellular region part;GO:0031091//platelet alpha granule	GO:0005126//cytokine receptor binding	GO:0001775//cell activation;GO:0007178//transmembrane receptor protein serine/threonine kinase signaling pathway;GO:0040007//growth;GO:0007599//hemostasis;GO:0006887//exocytosis	K04668//left-right determination factor	gi|10337603|ref|NP_066277.1|//left-right determination factor 1 preproprotein [Homo sapiens]
100133220	1672	0	10.82	4.29154	0.000519499	Up	0.00132773	GOLGA6L3	NA	NA	NA	K20358//golgin subfamily A member 2	gi|21757189|dbj|BAC05050.1|//unnamed protein product [Homo sapiens]
1803	3913	5	106	4.26191	8.7471e-24	Up	1.13757e-23	DPP4	GO:0031224//intrinsic component of membrane;GO:0031253//cell projection membrane;GO:0005911//cell-cell junction;GO:0016023//null;GO:0030027//lamellipodium	GO:0004175//endopeptidase activity;GO:0008238//exopeptidase activity;GO:0042802//identical protein binding;GO:0004871//signal transducer activity;GO:0019899//enzyme binding	GO:0016477//cell migration;GO:0006950//response to stress;GO:0010715//regulation of extracellular matrix disassembly;GO:0002456//T cell mediated immunity;GO:0008283//cell proliferation;GO:0031294//lymphocyte costimulation;GO:0019538//protein metabolic process;GO:0022407//regulation of cell-cell adhesion	K01278//dipeptidyl-peptidase 4 [EC:3.4.14.5]	gi|18765694|ref|NP_001926.2|//dipeptidyl peptidase 4 [Homo sapiens]
338440	2879	5	101	4.1922	1.43472e-22	Up	1.91063e-22	ANO9	GO:0034702//ion channel complex	GO:0005253//anion channel activity	GO:0006810//transport	K19503//anoctamin-9	gi|145611446|ref|NP_001012302.2|//anoctamin-9 [Homo sapiens]
149345	1653	62	1244	4.18249	1.0666e-255	Up	4.21714e-256	SHISA4	GO:0031224//intrinsic component of membrane	NA	NA	K10135//scotin	gi|966922730|ref|XP_014975759.1|//PREDICTED: LOW QUALITY PROTEIN: protein shisa-4 [Macaca mulatta];gi|269973884|ref|NP_937792.2|//protein shisa-4 precursor [Homo sapiens]
6297	4961	0	10	4.17784	0.000836853	Up	0.00218467	SALL2	GO:0043231//intracellular membrane-bounded organelle	GO:0046914//transition metal ion binding;GO:0001071//null;GO:0003676//nucleic acid binding	GO:0006351//transcription, DNA-templated	K19871//sal-like protein	gi|612339326|ref|NP_001278375.1|//sal-like protein 2 isoform b [Homo sapiens];gi|612339330|ref|NP_001278376.1|//sal-like protein 2 isoform c [Homo sapiens];gi|612339347|ref|NP_005398.2|//sal-like protein 2 isoform a [Homo sapiens];gi|158259739|dbj|BAF82047.1|//unnamed protein product [Homo sapiens]
55061	3030	0	10	4.17784	0.000836853	Up	0.00218467	SUSD4	GO:0031224//intrinsic component of membrane	NA	NA	K17495//CUB and sushi domain-containing protein	gi|148539593|ref|NP_060452.3|//sushi domain-containing protein 4 isoform a precursor [Homo sapiens];gi|81295416|ref|NP_001032252.1|//sushi domain-containing protein 4 isoform b precursor [Homo sapiens]
653505	785	0	9.91	4.1648	0.000882362	Up	0.00230795	PPIAL4A	GO:0044424//intracellular part	GO:0016859//cis-trans isomerase activity	GO:0044267//cellular protein metabolic process	K12738//peptidylprolyl cis-trans isomerase A-like 4 [EC:5.2.1.8]	gi|694987139|ref|XP_009438230.1|//PREDICTED: peptidyl-prolyl cis-trans isomerase A-like 4A/B/C, partial [Pan troglodytes]
27240	1238	1	19	4.10384	1.16818e-05	Up	2.64521e-05	SIT1	GO:0016021//integral component of membrane	GO:0019904//protein domain specific binding;GO:0019899//enzyme binding	GO:0023052//signaling;GO:0051249//regulation of lymphocyte activation	NA	gi|7657577|ref|NP_055265.1|//signaling threshold-regulating transmembrane adapter 1 precursor [Homo sapiens]
26	2446	35	653	4.07757	2.93622e-133	Up	1.6857e-133	AOC1	GO:0044421//extracellular region part;GO:0042579//microbody	GO:0016641//oxidoreductase activity, acting on the CH-NH2 group of donors, oxygen as acceptor;GO:0005539//glycosaminoglycan binding;GO:0046914//transition metal ion binding;GO:0048037//cofactor binding	GO:0006807//nitrogen compound metabolic process	K11182//diamine oxidase [EC:1.4.3.22]	gi|73486661|ref|NP_001082.2|//amiloride-sensitive amine oxidase [copper-containing] isoform 2 precursor [Homo sapiens];gi|440918691|ref|NP_001259001.1|//amiloride-sensitive amine oxidase [copper-containing] isoform 1 precursor [Homo sapiens]
25802	3967	4	73	4.04574	1.56346e-16	Up	2.36238e-16	LMOD1	GO:0044444//cytoplasmic part	NA	GO:0003012//muscle system process	K10370//tropomodulin	gi|795187390|ref|XP_011845930.1|//PREDICTED: leiomodin-1 [Mandrillus leucophaeus]
201633	2978	5	90	4.02584	6.79107e-20	Up	9.57235e-20	TIGIT	GO:0031224//intrinsic component of membrane	GO:0005488//binding	GO:0050863//regulation of T cell activation;GO:0001818//negative regulation of cytokine production;GO:0001819//positive regulation of cytokine production	K16350//T-cell immunoreceptor with Ig and ITIM domains	gi|57997171|emb|CAI46183.1|//hypothetical protein [Homo sapiens]
79608	5335	1	18	4.02584	2.06671e-05	Up	4.76577e-05	RIC3	GO:0043231//intracellular membrane-bounded organelle;GO:0031224//intrinsic component of membrane;GO:0012505//endomembrane system;GO:0031090//organelle membrane	NA	NA	NA	gi|694943278|ref|XP_009458160.1|//PREDICTED: protein RIC-3 isoform X1 [Pan troglodytes];gi|441645955|ref|XP_004090707.1|//PREDICTED: protein RIC-3 isoform X4 [Nomascus leucogenys];gi|205360985|ref|NP_001128581.1|//protein RIC-3 isoform b precursor [Homo sapiens];gi|821015497|ref|XP_012360184.1|//PREDICTED: protein RIC-3 isoform X1 [Nomascus leucogenys];gi|331640081|ref|NP_001193601.1|//protein RI…
53405	5752	1	18	4.02584	2.06671e-05	Up	4.76577e-05	CLIC5	GO:0043231//intracellular membrane-bounded organelle;GO:0034702//ion channel complex;GO:0015630//microtubule cytoskeleton;GO:0005902//microvillus;GO:0044444//cytoplasmic part	GO:0015036//disulfide oxidoreductase activity;GO:0005254//chloride channel activity;GO:0005488//binding	GO:0022414//reproductive process;GO:0060122//inner ear receptor cell stereocilium organization;GO:0019725//cellular homeostasis;GO:0033036//macromolecule localization;GO:0023052//signaling;GO:0050905//neuromuscular process;GO:0015698//inorganic anion transport;GO:0050954//sensory perception of mechanical stimulus	K05022//chloride intracellular channel protein 2;K05025//chloride intracellular channel protein 5;K05026//chloride intracellular channel protein 6	gi|7673566|gb|AAF66928.1|//CLIC5 [Homo sapiens];gi|166197662|ref|NP_001107558.1|//chloride intracellular channel protein 5 isoform a [Homo sapiens];gi|71296924|gb|AAH39380.1|//CLIC5 protein [Homo sapiens];gi|119624689|gb|EAX04284.1|//hCG2042290, partial [Homo sapiens];gi|365733560|ref|NP_001242952.1|//chloride intracellular channel protein 5 isoform c [Homo sapiens];gi|82617632|ref|NP_058625.2|//…
100526664	8830	4.93	84.67	3.95811	1.19196e-18	Up	1.71966e-18	LY75-CD302	GO:0016021//integral component of membrane	NA	GO:0002376//immune system process;GO:0006952//defense response	K06559//lymphocyte antigen 75	gi|311771585|ref|NP_001185689.1|//LY75-CD302 fusion protein isoform 2 precursor [Homo sapiens];gi|311771583|ref|NP_001185688.1|//LY75-CD302 fusion protein isoform 1 precursor [Homo sapiens]
5569	4072	1	17	3.94338	3.66378e-05	Up	8.60096e-05	PKIA	GO:0043231//intracellular membrane-bounded organelle	GO:0030291//protein serine/threonine kinase inhibitor activity	GO:0006357//regulation of transcription from RNA polymerase II promoter;GO:0006606//protein import into nucleus;GO:0000086//G2/M transition of mitotic cell cycle;GO:0033673//negative regulation of kinase activity	K15985//cAMP-dependent protein kinase inhibitor alpha	gi|545687656|ref|NP_001270325.1|//uncharacterized protein LOC101866541 precursor [Macaca fascicularis]
4843	4206	1	17	3.94338	3.66378e-05	Up	8.60096e-05	NOS2	GO:0005856//cytoskeleton;GO:0043231//intracellular membrane-bounded organelle;GO:0044444//cytoplasmic part	GO:0016709//oxidoreductase activity, acting on paired donors, with incorporation or reduction of molecular oxygen, NAD(P)H as one donor, and incorporation of one atom of oxygen;GO:0016597//amino acid binding;GO:0005506//iron ion binding;GO:0042802//identical protein binding;GO:0000166//nucleotide binding;GO:0050662//coenzyme binding	GO:0043467//regulation of generation of precursor metabolites and energy;GO:0031343//positive regulation of cell killing;GO:0001909//leukocyte mediated cytotoxicity;GO:0044271//cellular nitrogen compound biosynthetic process;GO:0072593//reactive oxygen species metabolic process;GO:0042742//defense response to bacterium;GO:0030073//insulin secretion;GO:0006525//arginine metabolic process;GO:000177…	K13241//nitric-oxide synthase, inducible [EC:1.14.13.39]	gi|24041029|ref|NP_000616.3|//nitric oxide synthase, inducible [Homo sapiens]
79658	3073	1	17	3.94338	3.66378e-05	Up	8.60096e-05	ARHGAP10	GO:0016020//membrane;GO:0044444//cytoplasmic part	GO:0019904//protein domain specific binding;GO:0030674//protein binding, bridging	GO:0030035//microspike assembly;GO:0009966//regulation of signal transduction;GO:0035556//intracellular signal transduction;GO:0006996//organelle organization;GO:0006915//apoptotic process	K13736//Rho GTPase-activating protein 10	gi|50843948|ref|NP_078881.3|//rho GTPase-activating protein 10 [Homo sapiens]
3575	4617	59	986	3.91871	2.03158e-195	Up	9.46544e-196	IL7R	GO:0031224//intrinsic component of membrane;GO:0009986//cell surface	GO:0004896//cytokine receptor activity	GO:0042592//homeostatic process;GO:0007165//signal transduction;GO:0002440//production of molecular mediator of immune response;GO:0007166//cell surface receptor signaling pathway;GO:0033077//T cell differentiation in thymus;GO:0032989//cellular component morphogenesis;GO:0001911//negative regulation of leukocyte mediated cytotoxicity;GO:0040007//growth;GO:0006310//DNA recombination;GO:0042113//B…	K05072//interleukin 7 receptor	gi|220683005|gb|ACL80333.1|//interleukin 7 receptor isoform H5-6 [Homo sapiens];gi|28610151|ref|NP_002176.2|//interleukin-7 receptor subunit alpha precursor [Homo sapiens]
4063	2280	7	112	3.85591	1.09528e-23	Up	1.42535e-23	LY9	GO:0031224//intrinsic component of membrane	NA	GO:0009987//cellular process;GO:0019724//B cell mediated immunity	K06570//lymphocyte antigen 9	gi|635103614|ref|XP_007974657.1|//PREDICTED: LOW QUALITY PROTEIN: T-lymphocyte surface antigen Ly-9-like [Chlorocebus sabaeus];gi|55925578|ref|NP_002339.2|//T-lymphocyte surface antigen Ly-9 isoform a precursor [Homo sapiens];gi|387848945|ref|NP_001248385.1|//T-lymphocyte surface antigen Ly-9 isoform c [Homo sapiens];gi|387762511|ref|NP_001248386.1|//T-lymphocyte surface antigen Ly-9 isoform d pr…
5961	3027	4	62	3.81011	7.50866e-14	Up	1.21305e-13	PRPH2	GO:0031224//intrinsic component of membrane	NA	GO:0050953//sensory perception of light stimulus;GO:0048856//anatomical structure development;GO:0009987//cellular process	K17343//peripherin-2	gi|118572596|ref|NP_000313.2|//peripherin-2 [Homo sapiens]
3213	3627	1	15	3.7628	0.000115879	Up	0.000281509	HOXB3	GO:0043231//intracellular membrane-bounded organelle	GO:0003677//DNA binding;GO:0001071//null	GO:0048513//animal organ development;GO:0009888//tissue development;GO:0048562//embryonic organ morphogenesis;GO:0003002//regionalization;GO:0006351//transcription, DNA-templated;GO:0035270//endocrine system development;GO:0048646//anatomical structure formation involved in morphogenesis;GO:0021563//glossopharyngeal nerve development;GO:0030097//hemopoiesis	K09303//homeobox protein HoxA/B/D3	gi|11138935|gb|AAG31555.1|AF287967_5//homeobox B3 [Homo sapiens];gi|694966086|ref|XP_009430090.1|//PREDICTED: homeobox protein Hox-B3 isoform X3 [Pan troglodytes];gi|767994518|ref|XP_011523009.1|//PREDICTED: homeobox protein Hox-B3 isoform X2 [Homo sapiens]
55520	2233	1	15	3.7628	0.000115879	Up	0.000281509	ELAC1	GO:0043231//intracellular membrane-bounded organelle	GO:0004521//endoribonuclease activity;GO:0043169//cation binding	GO:0042780//tRNA 3'-end processing	K00784//ribonuclease Z [EC:3.1.26.11]	gi|8922122|ref|NP_061166.1|//zinc phosphodiesterase ELAC protein 1 [Homo sapiens]
83473	2850	1	15	3.7628	0.000115879	Up	0.000281509	KATNAL2	NA	NA	NA	K07767//katanin p60 ATPase-containing subunit A1 [EC:3.6.4.3]	gi|530413973|ref|XP_005258414.1|//PREDICTED: katanin p60 ATPase-containing subunit A-like 2 isoform X1 [Homo sapiens]
926	1071	8	115	3.7014	1.19932e-23	Up	1.56176e-23	CD8B	GO:0005768//endosome;GO:0016021//integral component of membrane;GO:0043235//receptor complex	GO:0042287//MHC protein binding;GO:0004872//receptor activity	GO:0050688//regulation of defense response to virus;GO:0046649//lymphocyte activation;GO:0007167//enzyme linked receptor protein signaling pathway	K06459//T-cell surface glycoprotein CD8 beta chain	gi|296010933|ref|NP_001171571.1|//T-cell surface glycoprotein CD8 beta chain isoform 6 precursor [Homo sapiens];gi|635079435|ref|XP_008006689.1|//PREDICTED: T-cell surface glycoprotein CD8 beta chain isoform X2 [Chlorocebus sabaeus];gi|694895134|ref|XP_009441081.1|//PREDICTED: T-cell surface glycoprotein CD8 beta chain isoform X3 [Pan troglodytes]
5066	5320	111	1593.07	3.69909	1.78565e-302	Up	6.32252e-303	PAM	GO:0031224//intrinsic component of membrane;GO:0016023//null	GO:0016842//amidine-lyase activity;GO:0019842//vitamin binding;GO:0046914//transition metal ion binding;GO:0016715//oxidoreductase activity, acting on paired donors, with incorporation or reduction of molecular oxygen, reduced ascorbate as one donor, and incorporation of one atom of oxygen	GO:0043412//macromolecule modification;GO:0044237//cellular metabolic process	K00504//peptidylglycine monooxygenase [EC:1.14.17.3];K18200//peptidylamidoglycolate lyase [EC:4.3.2.5]	gi|21070982|ref|NP_620177.1|//peptidyl-glycine alpha-amidating monooxygenase isoform d precursor [Homo sapiens];gi|21070980|ref|NP_620176.1|//peptidyl-glycine alpha-amidating monooxygenase isoform c precursor [Homo sapiens];gi|578810401|ref|XP_006714699.1|//PREDICTED: peptidyl-glycine alpha-amidating monooxygenase isoform X10 [Homo sapiens];gi|293336314|ref|NP_001170777.1|//peptidyl-glycine alpha…
158471	4458	12	172	3.69722	2.14054e-34	Up	2.37898e-34	PRUNE2	GO:0044424//intracellular part	GO:0043169//cation binding;GO:0016818//hydrolase activity, acting on acid anhydrides, in phosphorus-containing anhydrides	GO:0022403//cell cycle phase;GO:0012502//induction of programmed cell death	K18449//prune homolog 2	gi|808688294|ref|NP_001294980.1|//protein prune homolog 2 isoform 6 [Homo sapiens] ;gi|808688296|ref|NP_001294977.1|//protein prune homolog 2 isoform 3 [Homo sapiens];gi|808688285|ref|NP_001294976.1|//protein prune homolog 2 isoform 2 [Homo sapiens];gi|578817123|ref|XP_006717046.1|//PREDICTED: protein prune homolog 2 isoform X2 [Homo sapiens];gi|808688287|ref|NP_001294979.1|//protein prune homolo…
11123	2392	11	157	3.6911	1.57407e-31	Up	1.82019e-31	RCAN3	NA	GO:0008092//cytoskeletal protein binding;GO:0003676//nucleic acid binding	GO:0032502//developmental process;GO:0019932//second-messenger-mediated signaling	K17905//calcipression-3	gi|354623074|ref|NP_001238911.1|//calcipressin-3 isoform 4 [Homo sapiens];gi|7305009|ref|NP_038469.1|//calcipressin-3 isoform 1 [Homo sapiens];gi|354623072|ref|NP_001238909.1|//calcipressin-3 isoform 2 [Homo sapiens];gi|354548852|ref|NP_001238914.1|//calcipressin-3 isoform 6 [Homo sapiens];gi|354548850|ref|NP_001238910.1|//calcipressin-3 isoform 3 [Homo sapiens]
915	759	10	140	3.66327	3.52493e-28	Up	4.28806e-28	CD3D	GO:0042101//T cell receptor complex;GO:0031224//intrinsic component of membrane;GO:0044424//intracellular part	GO:0004872//receptor activity;GO:0046983//protein dimerization activity	GO:0031294//lymphocyte costimulation;GO:0043368//positive T cell selection;GO:0050851//antigen receptor-mediated signaling pathway	K06450//T-cell surface glycoprotein CD3 delta chain	gi|4502669|ref|NP_000723.1|//T-cell surface glycoprotein CD3 delta chain isoform A precursor [Homo sapiens];gi|98985801|ref|NP_001035741.1|//T-cell surface glycoprotein CD3 delta chain isoform B precursor [Homo sapiens]
54674	3555	1	14	3.66327	0.00020604	Up	0.00051044	LRRN3	GO:0031224//intrinsic component of membrane;GO:0030119//AP-type membrane coat adaptor complex	GO:0005515//protein binding	GO:0001932//regulation of protein phosphorylation	K07523//netrin-G1 ligand;K16356//leucine-rich repeat and fibronectin type-III domain-containing protein 3;K16351//netrin-G2 ligand	gi|153791507|ref|NP_001093130.1|//leucine-rich repeat neuronal protein 3 precursor [Homo sapiens]
221476	2100	1	14	3.66327	0.00020604	Up	0.00051044	PI16	GO:0031224//intrinsic component of membrane	GO:0004857//enzyme inhibitor activity	NA	K20412//peptidase inhibitor 16	gi|821021735|ref|XP_012351912.1|//PREDICTED: peptidase inhibitor 16 isoform X1 [Nomascus leucogenys]
132001	1311	1	14	3.66327	0.00020604	Up	0.00051044	TAMM41	GO:0005743//mitochondrial inner membrane	NA	GO:0006626//protein targeting to mitochondrion	K17807//mitochondrial translocator assembly and maintenance protein 41	gi|119584514|gb|EAW64110.1|//chromosome 3 open reading frame 31, isoform CRA_c [Homo sapiens];gi|513027485|ref|XP_004874890.1|//PREDICTED: phosphatidate cytidylyltransferase, mitochondrial isoform X2 [Heterocephalus glaber];gi|597439562|sp|Q96BW9.2|TAM41_HUMAN//RecName: Full=Phosphatidate cytidylyltransferase, mitochondrial; AltName: Full=CDP-diacylglycerol synthase; Short=CDP-DAG synthase; AltNa…
10529	8003	28	390	3.65589	6.39096e-75	Up	4.89031e-75	NEBL	NA	GO:0008092//cytoskeletal protein binding;GO:0005198//structural molecule activity	GO:0032535//regulation of cellular component size	K18267//nebulin	gi|5453758|ref|NP_006384.1|//nebulette isoform 1 [Homo sapiens];gi|62088202|dbj|BAD92548.1|//nebulette non-muscle isoform variant [Homo sapiens]
8313	4241	4	54	3.6108	6.63494e-12	Up	1.13007e-11	AXIN2	GO:0016020//membrane;GO:0043231//intracellular membrane-bounded organelle;GO:0005815//microtubule organizing center;GO:0005874//microtubule;GO:0031410//cytoplasmic vesicle	GO:0019904//protein domain specific binding;GO:0060089//molecular transducer activity;GO:0019900//kinase binding;GO:0046332//SMAD binding;GO:0008047//enzyme activator activity	GO:0014070//response to organic cyclic compound;GO:0035411//catenin import into nucleus;GO:0030178//negative regulation of Wnt signaling pathway;GO:0008219//cell death;GO:0001503//ossification;GO:0007063//regulation of sister chromatid cohesion;GO:0001932//regulation of protein phosphorylation;GO:0009887//animal organ morphogenesis;GO:0008283//cell proliferation;GO:0009798//axis specification;GO:…	K04385//axin 2	gi|195927059|ref|NP_004646.3|//axin-2 [Homo sapiens]
56654	1548	3	40	3.59288	2.90068e-09	Up	5.47599e-09	NPDC1	GO:0031224//intrinsic component of membrane	NA	NA	K09367//POU domain transcription factor, class 5;K01509//adenosinetriphosphatase [EC:3.6.1.3]	gi|223029449|ref|NP_056207.3|//neural proliferation differentiation and control protein 1 precursor [Homo sapiens]
387836	833	2	26	3.55635	1.31504e-06	Up	2.81774e-06	CLEC2A	GO:0031224//intrinsic component of membrane	GO:0030246//carbohydrate binding;GO:0042802//identical protein binding;GO:0004871//signal transducer activity	GO:0001909//leukocyte mediated cytotoxicity	K10072//C-type lectin domain family 2 member D	gi|46409380|ref|NP_997258.1|//C-type lectin domain family 2 member A isoform 2 [Homo sapiens];gi|195222725|ref|NP_001124183.1|//C-type lectin domain family 2 member A isoform 1 [Homo sapiens]
1601	4554	2	26	3.55635	1.31504e-06	Up	2.81774e-06	DAB2	GO:0012505//endomembrane system;GO:0030136//clathrin-coated vesicle	GO:0005515//protein binding	GO:0000902//cell morphogenesis;GO:0043393//regulation of protein binding;GO:0003008//system process;GO:0030178//negative regulation of Wnt signaling pathway;GO:0006355//regulation of transcription, DNA-templated;GO:0016049//cell growth;GO:0043009//chordate embryonic development;GO:0031331//positive regulation of cellular catabolic process;GO:0001932//regulation of protein phosphorylation;GO:00600…	K12475//disabled homolog 2	gi|820988684|ref|XP_012357126.1|//PREDICTED: disabled homolog 2 isoform X1 [Nomascus leucogenys]
2694	1536	1	13	3.55635	0.000367264	Up	0.000926781	GIF	GO:0043231//intracellular membrane-bounded organelle;GO:0042995//cell projection;GO:0044421//extracellular region part;GO:0044459//plasma membrane part	GO:0019842//vitamin binding	GO:0000041//transition metal ion transport;GO:0051180//vitamin transport;GO:0006767//water-soluble vitamin metabolic process	K14615//gastric intrinsic factor	gi|32189398|ref|NP_005133.2|//gastric intrinsic factor precursor [Homo sapiens]
7056	4048	1018	12566	3.48163	0	Up	0	THBD	GO:0044421//extracellular region part;GO:0016021//integral component of membrane	GO:0046872//metal ion binding;GO:0004872//receptor activity	GO:0002376//immune system process;GO:0010212//response to ionizing radiation;GO:0007275//multicellular organism development;GO:0022414//reproductive process;GO:0002237//response to molecule of bacterial origin;GO:0030194//positive regulation of blood coagulation;GO:0010543//regulation of platelet activation	K03907//thrombomodulin	gi|119630577|gb|EAX10172.1|//thrombomodulin [Homo sapiens]
3738	2599	8	97	3.45583	2.60644e-19	Up	3.70687e-19	KCNA3	GO:0005887//integral component of plasma membrane	GO:0005249//voltage-gated potassium channel activity;GO:0005488//binding	GO:0034220//ion transmembrane transport;GO:0030001//metal ion transport	K12581//CCR4-NOT transcription complex subunit 7/8;K11447//histone demethylase [EC:1.14.11.-];K04876//potassium voltage-gated channel Shaker-related subfamily A member 3;K01064//wingless-type MMTV integration site family, member 9	gi|119577137|gb|EAW56733.1|//similar to zinc finger protein 569, isoform CRA_a [Homo sapiens];gi|88758565|ref|NP_002223.3|//potassium voltage-gated channel subfamily A member 3 [Homo sapiens];gi|821008889|ref|XP_012355848.1|//PREDICTED: potassium voltage-gated channel subfamily A member 3 [Nomascus leucogenys]
23263	3466	1	12	3.44088	0.000651938	Up	0.00168465	MCF2L	GO:0016020//membrane;GO:0044444//cytoplasmic part	GO:0005088//Ras guanyl-nucleotide exchange factor activity	GO:0007169//transmembrane receptor protein tyrosine kinase signaling pathway;GO:0007266//Rho protein signal transduction;GO:0009966//regulation of signal transduction	K01530//phospholipid-translocating ATPase [EC:3.6.3.1];K08810//triple functional domain protein [EC:2.7.11.1]	gi|339276002|ref|NP_079255.4|//guanine nucleotide exchange factor DBS isoform b precursor [Homo sapiens];gi|767979233|ref|XP_011535791.1|//PREDICTED: guanine nucleotide exchange factor DBS isoform X8 [Homo sapiens];gi|530426953|ref|XP_005268366.1|//PREDICTED: guanine nucleotide exchange factor DBS isoform X4 [Homo sapiens];gi|339276000|ref|NP_001106203.2|//guanine nucleotide exchange factor DBS i…
374308	2528	1	12	3.44088	0.000651938	Up	0.00168465	PTCHD3	GO:0031224//intrinsic component of membrane	GO:0004888//transmembrane signaling receptor activity	GO:0007281//germ cell development	K12385//Niemann-Pick C1 protein;K10732//GINS complex subunit 1	gi|34532356|dbj|BAC86399.1|//unnamed protein product [Homo sapiens]
51440	4454	1	12	3.44088	0.000651938	Up	0.00168465	HPCAL4	GO:0044464//cell part	GO:0046872//metal ion binding;GO:0005515//protein binding;GO:0016247//channel regulator activity	GO:0007399//nervous system development	K19936//visinin-like protein 1	gi|731219912|ref|XP_010624191.1|//PREDICTED: hippocalcin-like protein 4 isoform X1 [Fukomys damarensis];gi|635109244|ref|XP_007977495.1|//PREDICTED: hippocalcin-like protein 4 isoform X2 [Chlorocebus sabaeus];gi|538918407|ref|NP_001269326.1|//hippocalcin-like protein 4 isoform 2 [Homo sapiens]
139189	7409	1	12	3.44088	0.000651938	Up	0.00168465	DGKK	GO:0016020//membrane;GO:0044424//intracellular part	GO:0043169//cation binding;GO:0032559//adenyl ribonucleotide binding;GO:0016301//kinase activity	GO:0007186//G-protein coupled receptor signaling pathway;GO:0001775//cell activation;GO:0006950//response to stress;GO:0007599//hemostasis;GO:0006639//acylglycerol metabolic process	K00901//diacylglycerol kinase (ATP) [EC:2.7.1.107]	gi|62000702|ref|NP_001013764.1|//diacylglycerol kinase kappa [Homo sapiens]
1040	4546	1	12	3.44088	0.000651938	Up	0.00168465	CDS1	GO:0043231//intracellular membrane-bounded organelle;GO:0031224//intrinsic component of membrane;GO:0031090//organelle membrane	GO:0070567//cytidylyltransferase activity;GO:0017169//CDP-alcohol phosphatidyltransferase activity	GO:0050953//sensory perception of light stimulus;GO:0023052//signaling;GO:0006656//phosphatidylcholine biosynthetic process	K00981//phosphatidate cytidylyltransferase [EC:2.7.7.41]	gi|22035624|ref|NP_001254.2|//phosphatidate cytidylyltransferase 1 [Homo sapiens]
27175	1841	1.66	19.22	3.38927	3.33523e-05	Up	7.79874e-05	TUBG2	GO:0005874//microtubule;GO:0005819//spindle;GO:0005813//centrosome	GO:0032561//guanyl ribonucleotide binding;GO:0017111//nucleoside-triphosphatase activity	GO:0022402//cell cycle process;GO:0043623//cellular protein complex assembly	K10389//tubulin gamma	gi|640819048|ref|XP_008066413.1|//PREDICTED: tubulin gamma-2 chain [Tarsius syrichta]
914	1582	28	313	3.33858	1.81503e-56	Up	1.58879e-56	CD2	GO:0009986//cell surface;GO:0044459//plasma membrane part;GO:0016021//integral component of membrane;GO:0031225//anchored component of membrane	GO:0042802//identical protein binding;GO:0004871//signal transducer activity	GO:0001773//myeloid dendritic cell activation;GO:0012502//induction of programmed cell death;GO:0007155//cell adhesion;GO:0007165//signal transduction;GO:0031580//membrane raft distribution;GO:0007599//hemostasis;GO:0045619//regulation of lymphocyte differentiation	K06449//T-cell surface glycoprotein CD2	gi|686702695|ref|XP_009244062.1|//PREDICTED: T-cell surface antigen CD2 isoform X1 [Pongo abelii];gi|180094|gb|AAA51946.1|//CD2 surface antigen [Homo sapiens]
50852	1808	4	44	3.31535	1.69944e-09	Up	3.1753e-09	TRAT1	GO:0016021//integral component of membrane;GO:0043235//receptor complex	GO:0030674//protein binding, bridging;GO:0035004//phosphatidylinositol 3-kinase activity	GO:0001881//receptor recycling;GO:0050856//regulation of T cell receptor signaling pathway;GO:0048519//negative regulation of biological process;GO:0006952//defense response;GO:0009967//positive regulation of signal transduction;GO:0007167//enzyme linked receptor protein signaling pathway	NA	gi|54607137|ref|NP_057472.2|//T-cell receptor-associated transmembrane adapter 1 isoform 1 [Homo sapiens]
8364	390	23	250	3.29814	4.77373e-45	Up	4.67501e-45	HIST1H4C	GO:0043231//intracellular membrane-bounded organelle;GO:0000785//chromatin	NA	GO:0034728//nucleosome organization	K11254//histone H4	gi|953881761|ref|XP_014590042.1|//PREDICTED: histone H4 [Equus caballus]
115352	2934	9	97	3.2859	1.35536e-18	Up	1.95767e-18	FCRL3	GO:0031224//intrinsic component of membrane	GO:0004871//signal transducer activity	NA	K06727//Fc receptor-like protein	gi|16033591|gb|AAL13291.1|AF416902_1//SH2 domain-containing phosphatase anchor protein 2b [Homo sapiens];gi|998614219|ref|NP_001307262.1|//Fc receptor-like protein 3 isoform 3 precursor [Homo sapiens];gi|686701715|ref|XP_009240980.1|//PREDICTED: Fc receptor-like protein 3 isoform X1 [Pongo abelii];gi|16033594|gb|AAL13292.1|AF416903_1//SH2 domain-containing phosphatase anchor protein 2c [Homo sapi…
10376	1771	2606.14	28064.3	3.28467	0	Up	0	TUBA1B	GO:0032991//macromolecular complex;GO:0015630//microtubule cytoskeleton	GO:0032561//guanyl ribonucleotide binding;GO:0017111//nucleoside-triphosphatase activity;GO:0005198//structural molecule activity	GO:0006458//'de novo' protein folding;GO:0007010//cytoskeleton organization;GO:0007017//microtubule-based process;GO:0009207//purine ribonucleoside triphosphate catabolic process;GO:0043623//cellular protein complex assembly	K07374//tubulin alpha	gi|34740335|ref|NP_035784.1|//tubulin alpha-1B chain [Mus musculus]
1493	1923	4.77	51.02	3.27492	1.25409e-10	Up	2.2424e-10	CTLA4	GO:0009986//cell surface;GO:0030139//endocytic vesicle;GO:0016021//integral component of membrane	GO:0004871//signal transducer activity	GO:0030888//regulation of B cell proliferation;GO:0045581//negative regulation of T cell differentiation;GO:0033554//cellular response to stress;GO:0031294//lymphocyte costimulation;GO:0050851//antigen receptor-mediated signaling pathway;GO:0006915//apoptotic process	K06538//cytotoxic T-lymphocyte-associated protein 4	gi|21361212|ref|NP_005205.2|//cytotoxic T-lymphocyte protein 4 isoform CTLA4-TM precursor [Homo sapiens]
360	1882	14	147	3.24823	5.95223e-27	Up	7.37969e-27	AQP3	GO:0031224//intrinsic component of membrane;GO:0044424//intracellular part;GO:0030054//cell junction	GO:0015168//glycerol transmembrane transporter activity;GO:0005372//water transmembrane transporter activity	GO:0030856//regulation of epithelial cell differentiation;GO:0009887//animal organ morphogenesis;GO:0008643//carbohydrate transport;GO:0003097//renal water transport;GO:0002376//immune system process;GO:0042886//amide transport;GO:0010038//response to metal ion;GO:0033189//response to vitamin A	K09876//aquaporin-3	gi|25815123|emb|CAD38526.1|//aquaporin-3 [Homo sapiens];gi|4826645|ref|NP_004916.1|//aquaporin-3 isoform 1 [Homo sapiens]
9258	5255	14	143	3.20843	5.24517e-26	Up	6.59592e-26	MFHAS1	NA	NA	NA	K16175//protein scribble;K08843//leucine-rich repeat kinase 1 [EC:2.7.11.1]	gi|110825984|ref|NP_004216.2|//malignant fibrous histiocytoma-amplified sequence 1 [Homo sapiens]
1524	3118	119	1192	3.18026	6.38269e-201	Up	2.91461e-201	CX3CR1	GO:0016021//integral component of membrane	GO:0001637//G-protein coupled chemoattractant receptor activity	GO:0021987//cerebral cortex development;GO:0001525//angiogenesis;GO:0006952//defense response;GO:0030595//leukocyte chemotaxis;GO:0007166//cell surface receptor signaling pathway;GO:0001774//microglial cell activation;GO:0051704//multi-organism process;GO:0006915//apoptotic process	K04192//CX3C chemokine receptor 1	gi|283837934|ref|NP_001164645.1|//CX3C chemokine receptor 1 isoform a [Homo sapiens]
55314	3318	3	30	3.17784	7.48853e-07	Up	1.58378e-06	TMEM144	GO:0031224//intrinsic component of membrane	NA	NA	NA	gi|40254921|ref|NP_060812.2|//transmembrane protein 144 [Homo sapiens]
462	1599	2	20	3.17784	3.77694e-05	Up	8.87403e-05	SERPINC1	GO:0016020//membrane;GO:0044421//extracellular region part;GO:0043234//protein complex	GO:0016728//oxidoreductase activity, acting on CH or CH2 groups, disulfide as acceptor;GO:0005539//glycosaminoglycan binding;GO:0004866//endopeptidase inhibitor activity;GO:0019899//enzyme binding	GO:0010466//negative regulation of peptidase activity;GO:0006508//proteolysis;GO:0031667//response to nutrient levels;GO:0007599//hemostasis;GO:0006259//DNA metabolic process;GO:0031348//negative regulation of defense response	K03911//antithrombin III	gi|4502261|ref|NP_000479.1|//antithrombin-III precursor [Homo sapiens]
401124	3280	4	39	3.14132	2.63544e-08	Up	5.18928e-08	DTHD1	NA	NA	GO:0023052//signaling	K10380//ankyrin;K10130//leucine-rich repeats and death domain-containing protein	gi|578808546|ref|XP_006714077.1|//PREDICTED: death domain-containing protein 1 isoform X2 [Homo sapiens];gi|218563746|ref|NP_001130008.2|//death domain-containing protein 1 isoform 2 [Homo sapiens]
4058	2753	8	77	3.1227	1.48427e-14	Up	2.35325e-14	LTK	GO:0016021//integral component of membrane	GO:0004713//protein tyrosine kinase activity;GO:0032559//adenyl ribonucleotide binding;GO:0004871//signal transducer activity	GO:0006464//cellular protein modification process;GO:0007167//enzyme linked receptor protein signaling pathway	K05118//leukocyte tyrosine kinase [EC:2.7.10.1]	gi|46249416|ref|NP_996844.1|//leukocyte tyrosine kinase receptor isoform 2 precursor [Homo sapiens];gi|440855|dbj|BAA03679.1|//leukocyte tyrosine kinase [Homo sapiens];gi|208879423|ref|NP_001129157.1|//leukocyte tyrosine kinase receptor isoform 3 precursor [Homo sapiens]
3932	2119	35	335	3.11465	7.83585e-57	Up	6.83047e-57	LCK	GO:0005813//centrosome;GO:0044425//membrane part;GO:0016023//null	GO:0004713//protein tyrosine kinase activity;GO:0019904//protein domain specific binding;GO:0004721//phosphoprotein phosphatase activity;GO:0032559//adenyl ribonucleotide binding;GO:0019900//kinase binding;GO:0005102//receptor binding	GO:0012502//induction of programmed cell death;GO:0009605//response to external stimulus;GO:0050688//regulation of defense response to virus;GO:0006468//protein phosphorylation;GO:0045987//positive regulation of smooth muscle contraction;GO:0000302//response to reactive oxygen species;GO:0006915//apoptotic process;GO:0050856//regulation of T cell receptor signaling pathway;GO:0031294//lymphocyte …	K05856//lymphocyte cell-specific protein tyrosine kinase [EC:2.7.10.2]	gi|112789546|ref|NP_005347.3|//tyrosine-protein kinase Lck [Homo sapiens];gi|957949689|gb|ALQ33621.1|//lymphocyte-specific protein tyrosine kinase isoform 3, partial [Homo sapiens]
4306	5564	7	67	3.11465	7.07106e-13	Up	1.17236e-12	NR3C2	GO:0031981//nuclear lumen;GO:0031090//organelle membrane	GO:0008289//lipid binding;GO:0003677//DNA binding;GO:0046914//transition metal ion binding;GO:0004879//nuclear receptor activity;GO:0001071//null	GO:0009755//hormone-mediated signaling pathway	K08555//mineralocorticoid receptor	gi|260656020|ref|NP_001159576.1|//mineralocorticoid receptor isoform 2 [Homo sapiens];gi|158508572|ref|NP_000892.2|//mineralocorticoid receptor isoform 1 [Homo sapiens]
274	2365	19	179	3.0918	4.48876e-31	Up	5.22719e-31	BIN1	GO:0005856//cytoskeleton;GO:0030136//clathrin-coated vesicle;GO:0033267//axon part	GO:0019899//enzyme binding;GO:0046983//protein dimerization activity	GO:0043087//regulation of GTPase activity;GO:0030154//cell differentiation;GO:0030100//regulation of endocytosis;GO:0032501//multicellular organismal process;GO:0051704//multi-organism process	K12562//amphiphysin	gi|21536409|ref|NP_647597.1|//myc box-dependent-interacting protein 1 isoform 5 [Homo sapiens];gi|21536417|ref|NP_647601.1|//myc box-dependent-interacting protein 1 isoform 10 [Homo sapiens];gi|724825734|ref|XP_010361770.1|//PREDICTED: myc box-dependent-interacting protein 1 isoform X11 [Rhinopithecus roxellana];gi|21536404|ref|NP_647595.1|//myc box-dependent-interacting protein 1 isoform 3 [Homo…
7846	1935	12883.9	121292	3.09075	0	Up	0	TUBA1A	GO:0005874//microtubule;GO:0044444//cytoplasmic part	GO:0032561//guanyl ribonucleotide binding;GO:0017111//nucleoside-triphosphatase activity;GO:0046983//protein dimerization activity	GO:0006458//'de novo' protein folding;GO:0022402//cell cycle process;GO:0007017//microtubule-based process;GO:0009207//purine ribonucleoside triphosphate catabolic process;GO:0043623//cellular protein complex assembly	K07374//tubulin alpha	gi|989976244|ref|XP_015448635.1|//PREDICTED: tubulin alpha-1C chain [Pteropus alecto]
79734	1516	4	37	3.06537	7.82899e-08	Up	1.57478e-07	KCTD17	GO:0005887//integral component of plasma membrane	GO:0005515//protein binding;GO:0005267//potassium channel activity	GO:0030001//metal ion transport	K15074//BTB/POZ domain-containing adapter for CUL3-mediated RhoA degradation protein;K01011//thiosulfate/3-mercaptopyruvate sulfurtransferase [EC:2.8.1.1 2.8.1.2]	gi|19263505|gb|AAH25403.1|//Potassium channel tetramerisation domain containing 17 [Homo sapiens] ;gi|958731838|ref|XP_014706707.1|//PREDICTED: BTB/POZ domain-containing protein KCTD17 isoform X3 [Equus asinus];gi|675764673|ref|XP_003821599.2|//PREDICTED: BTB/POZ domain-containing protein KCTD17 isoform X5 [Pan paniscus];gi|533128195|ref|XP_005379242.1|//PREDICTED: BTB/POZ domain-containing prote…
2239	3714	9	81	3.02584	7.94051e-15	Up	1.24867e-14	GPC4	GO:0031012//extracellular matrix;GO:0009986//cell surface;GO:0016021//integral component of membrane	GO:0043394//proteoglycan binding	GO:0032502//developmental process	K08110//glypican 4	gi|21614525|ref|NP_001439.2|//glypican-4 precursor [Homo sapiens]
1240	5283	4	36	3.02584	1.34335e-07	Up	2.73798e-07	CMKLR1	GO:0016021//integral component of membrane	GO:0001637//G-protein coupled chemoattractant receptor activity	GO:0002690//positive regulation of leukocyte chemotaxis;GO:0007166//cell surface receptor signaling pathway;GO:0048731//system development	K04245//chemokine-like receptor 1	gi|215272317|ref|NP_001135815.1|//chemokine-like receptor 1 isoform a [Homo sapiens]
4642	5591	4	36	3.02584	1.34335e-07	Up	2.73798e-07	MYO1D	GO:0005783//endoplasmic reticulum;GO:0015629//actin cytoskeleton;GO:0032589//neuron projection membrane	GO:0032559//adenyl ribonucleotide binding;GO:0003774//motor activity;GO:0008092//cytoskeletal protein binding;GO:0042623//ATPase activity, coupled	NA	K10356//myosin I	gi|119600627|gb|EAW80221.1|//myosin ID, isoform CRA_a [Homo sapiens];gi|119600631|gb|EAW80225.1|//myosin ID, isoform CRA_e, partial [Homo sapiens]
11043	7255	3	27	3.02584	3.86478e-06	Up	8.51024e-06	MID2	GO:0005815//microtubule organizing center	GO:0046914//transition metal ion binding;GO:0003824//catalytic activity	NA	K10647//midline 2 [EC:2.3.2.27]	gi|332226085|ref|XP_003262220.1|//PREDICTED: probable E3 ubiquitin-protein ligase MID2 isoform X2 [Nomascus leucogenys];gi|332226087|ref|XP_003262221.1|//PREDICTED: probable E3 ubiquitin-protein ligase MID2 isoform X1 [Nomascus leucogenys]
57665	1602	2	17.77	3.00729	0.00013	Up	0.000316874	RDH14	GO:0043231//intracellular membrane-bounded organelle	GO:0003824//catalytic activity	GO:0008152//metabolic process	K11162//retinol dehydrogenase 14 [EC:1.1.1.-]	gi|725585510|ref|XP_010344050.1|//PREDICTED: retinol dehydrogenase 14 [Saimiri boliviensis boliviensis]
51367	773	12	106	2.99887	1.101e-18	Up	1.58656e-18	POP5	GO:0031981//nuclear lumen;GO:0030681//multimeric ribonuclease P complex	GO:0004549//tRNA-specific ribonuclease activity;GO:0005488//binding;GO:0004518//nuclease activity	GO:0006399//tRNA metabolic process	K03537//ribonuclease P/MRP protein subunit POP5 [EC:3.1.26.5]	gi|694952617|ref|XP_009424676.1|//PREDICTED: ribonuclease P/MRP protein subunit POP5 isoform X2 [Pan troglodytes];gi|694952615|ref|XP_509430.3|//PREDICTED: ribonuclease P/MRP protein subunit POP5 isoform X1 [Pan troglodytes]
1636	4969	4	35	2.9852	2.30679e-07	Up	4.75348e-07	ACE	GO:0031224//intrinsic component of membrane;GO:0043231//intracellular membrane-bounded organelle;GO:0044421//extracellular region part;GO:0009986//cell surface	GO:0043168//anion binding;GO:0008238//exopeptidase activity;GO:0001664//G-protein coupled receptor binding;GO:0008092//cytoskeletal protein binding;GO:0046914//transition metal ion binding	GO:0015909//long-chain fatty acid transport;GO:0048771//tissue remodeling;GO:0048513//animal organ development;GO:0002016//regulation of blood volume by renin-angiotensin;GO:0006518//peptide metabolic process;GO:0042310//vasoconstriction;GO:0014909//smooth muscle cell migration;GO:0002002//regulation of angiotensin levels in blood;GO:0070661//leukocyte proliferation;GO:0048863//stem cell differen…	K01283//peptidyl-dipeptidase A [EC:3.4.15.1]	gi|4503273|ref|NP_000780.1|//angiotensin-converting enzyme isoform 1 precursor [Homo sapiens];gi|23238214|ref|NP_690043.1|//angiotensin-converting enzyme isoform 2 precursor [Homo sapiens];gi|295844837|ref|NP_001171528.1|//angiotensin-converting enzyme isoform 3 precursor [Homo sapiens]
23547	1963	7.6	66.23	2.97933	2.6641e-12	Up	4.48585e-12	LILRA4	GO:0031224//intrinsic component of membrane	GO:0004871//signal transducer activity	NA	K06512//leukocyte immunoglobulin-like receptor	gi|119592636|gb|EAW72230.1|//leukocyte immunoglobulin-like receptor, subfamily A (with TM domain), member 4, isoform CRA_a [Homo sapiens]
122060	1968	3	26	2.97139	6.66471e-06	Up	1.48592e-05	SLAIN1	NA	NA	NA	K16580//SLAIN motif-containing protein 1/2	gi|338968860|ref|NP_001229797.1|//SLAIN motif-containing protein 1 isoform C [Homo sapiens];gi|338968858|ref|NP_001035243.2|//SLAIN motif-containing protein 1 isoform A precursor [Homo sapiens] ;gi|998659895|ref|XP_015495887.1|//PREDICTED: SLAIN motif-containing protein 1 isoform X2 [Parus major];gi|92095629|gb|AAH45177.2|//SLAIN1 protein, partial [Homo sapiens];gi|338968862|ref|NP_001229798.1|//…
401427	933	2	17.27	2.96611	0.000171073	Up	0.000421025	OR2A7	GO:0031224//intrinsic component of membrane	GO:0004930//G-protein coupled receptor activity	GO:0007606//sensory perception of chemical stimulus	K04257//olfactory receptor	gi|52693945|ref|NP_001005328.1|//olfactory receptor 2A7 [Homo sapiens]
79652	1647	3.88	33	2.94425	5.66533e-07	Up	1.19014e-06	TMEM204	GO:0031224//intrinsic component of membrane;GO:0070161//anchoring junction	NA	GO:0001944//vasculature development;GO:0042692//muscle cell differentiation;GO:0009966//regulation of signal transduction	NA	gi|112807182|ref|NP_078876.2|//transmembrane protein 204 precursor [Homo sapiens]
8911	9902	8	68	2.94338	1.86812e-12	Up	3.1356e-12	CACNA1I	GO:0034704//calcium channel complex	GO:0005245//voltage-gated calcium channel activity;GO:0005488//binding	GO:0023052//signaling;GO:0032412//regulation of ion transmembrane transporter activity;GO:0006935//chemotaxis;GO:0070838//divalent metal ion transport	K04856//voltage-dependent calcium channel T type alpha-1I	gi|21622605|gb|AAM67414.1|AF393329_1//voltage-dependent calcium channel T-type alpha 1I subunit [Homo sapiens];gi|21361077|ref|NP_066919.2|//voltage-dependent T-type calcium channel subunit alpha-1I isoform a [Homo sapiens]
8038	8041	2	17	2.94338	0.000198475	Up	0.000490752	ADAM12	GO:0031224//intrinsic component of membrane	GO:0004175//endopeptidase activity;GO:0019904//protein domain specific binding;GO:0046914//transition metal ion binding	GO:0007169//transmembrane receptor protein tyrosine kinase signaling pathway;GO:0019538//protein metabolic process;GO:0000768//syncytium formation by plasma membrane fusion	K06835//disintegrin and metalloproteinase domain-containing protein 12 [EC:3.4.24.-]	gi|73747887|ref|NP_067673.2|//disintegrin and metalloproteinase domain-containing protein 12 isoform 2 preproprotein [Homo sapiens];gi|572882555|ref|NP_001275904.1|//disintegrin and metalloproteinase domain-containing protein 12 isoform 5 preproprotein [Homo sapiens];gi|572882446|ref|NP_001275902.1|//disintegrin and metalloproteinase domain-containing protein 12 isoform 3 preproprotein [Homo sapi…
84976	4945	2	17	2.94338	0.000198475	Up	0.000490752	DISP1	GO:0031224//intrinsic component of membrane;GO:0044459//plasma membrane part	GO:0022892//null;GO:0004888//transmembrane signaling receptor activity	GO:0009855//determination of bilateral symmetry;GO:0003002//regionalization;GO:0007166//cell surface receptor signaling pathway;GO:0051260//protein homooligomerization;GO:0051046//regulation of secretion;GO:0009790//embryo development;GO:0035638//signal maturation;GO:0060538//skeletal muscle organ development	K12385//Niemann-Pick C1 protein;K10649//tripartite motif-containing protein 9/67;K18730//PERQ amino acid-rich with GYF domain-containing protein	gi|25952134|ref|NP_116279.2|//protein dispatched homolog 1 [Homo sapiens]
1397	1247	7	59	2.9312	5.18304e-11	Up	9.13656e-11	CRIP2	GO:0044421//extracellular region part	GO:0046914//transition metal ion binding	GO:0008283//cell proliferation;GO:0048534//hematopoietic or lymphoid organ development	K09851//Ras association domain-containing protein 2/4;K09377//cysteine and glycine-rich protein	gi|399498492|ref|NP_001257770.1|//cysteine-rich protein 2 isoform 3 [Homo sapiens] ;gi|821030108|ref|XP_012353331.1|//PREDICTED: cysteine-rich protein 2 [Nomascus leucogenys];gi|399498490|ref|NP_001257766.1|//cysteine-rich protein 2 isoform 2 [Homo sapiens] ;gi|795391210|ref|XP_011753371.1|//PREDICTED: cysteine-rich protein 2 isoform X1 [Macaca nemestrina];gi|724892235|ref|XP_010375210.1|//PREDIC…
84836	2021	16	134	2.922	1.36761e-22	Up	1.81896e-22	ABHD14B	GO:0043231//intracellular membrane-bounded organelle	GO:0003824//catalytic activity	NA	K13706//abhydrolase domain-containing protein 14	gi|675728233|ref|XP_008980014.1|//PREDICTED: alpha/beta hydrolase domain-containing protein 14B isoform X1 [Callithrix jacchus];gi|426340785|ref|XP_004034308.1|//PREDICTED: abhydrolase domain-containing protein 14B isoform 4 [Gorilla gorilla gorilla];gi|363543330|ref|NP_001241682.1|//protein ABHD14B isoform 3 [Homo sapiens]
102	5050	5001	11351	1.03844	0	Up	0	ADAM10	GO:0031224//intrinsic component of membrane;GO:0044430//cytoskeletal part;GO:0016023//null	GO:0004175//endopeptidase activity;GO:0019904//protein domain specific binding;GO:0042802//identical protein binding;GO:0019900//kinase binding;GO:0046914//transition metal ion binding;GO:0005102//receptor binding	GO:0006509//membrane protein ectodomain proteolysis;GO:0034097//response to cytokine;GO:0007154//cell communication;GO:0002690//positive regulation of leukocyte chemotaxis;GO:0016049//cell growth;GO:0043009//chordate embryonic development;GO:0007155//cell adhesion;GO:0007169//transmembrane receptor protein tyrosine kinase signaling pathway;GO:0006464//cellular protein modification process;GO:0008…	K06704//disintegrin and metalloproteinase domain-containing protein 10 [EC:3.4.24.81]	gi|724878181|ref|XP_010372558.1|//PREDICTED: disintegrin and metalloproteinase domain-containing protein 10 [Rhinopithecus roxellana]
92745	1993	3.99	32.69	2.8903	7.85903e-07	Up	1.66452e-06	SLC38A5	GO:0031224//intrinsic component of membrane	GO:0015175//neutral amino acid transmembrane transporter activity	GO:0006807//nitrogen compound metabolic process;GO:0006865//amino acid transport	K14992//solute carrier family 38 (sodium-coupled neutral amino acid transporter), member 5	gi|193788624|ref|NP_277053.2|//sodium-coupled neutral amino acid transporter 5 [Homo sapiens]
8718	1370	19	155	2.88411	1.58688e-25	Up	2.01115e-25	TNFRSF25	GO:0016021//integral component of membrane;GO:0044444//cytoplasmic part	GO:0005035//death receptor activity	GO:0019221//cytokine-mediated signaling pathway	K05160//tumor necrosis factor receptor superfamily member 25	gi|119591951|gb|EAW71545.1|//hCG2005428, isoform CRA_g [Homo sapiens];gi|119591955|gb|EAW71549.1|//hCG2005428, isoform CRA_k [Homo sapiens];gi|119591948|gb|EAW71542.1|//hCG2005428, isoform CRA_d [Homo sapiens];gi|821034634|ref|XP_003274345.2|//PREDICTED: tumor necrosis factor receptor superfamily member 25 isoform X4 [Nomascus leucogenys];gi|119591952|gb|EAW71546.1|//hCG2005428, isoform CRA_h [Ho…
90	2881	16	130	2.87828	1.12771e-21	Up	1.52777e-21	ACVR1	GO:0016021//integral component of membrane;GO:0043235//receptor complex	GO:0043169//cation binding;GO:0032559//adenyl ribonucleotide binding;GO:0042802//identical protein binding;GO:0017002//activin-activated receptor activity;GO:0005024//transforming growth factor beta-activated receptor activity;GO:0019838//growth factor binding;GO:0032403//protein complex binding	GO:0030282//bone mineralization;GO:0016202//regulation of striated muscle tissue development;GO:0009855//determination of bilateral symmetry;GO:0003006//developmental process involved in reproduction;GO:0001525//angiogenesis;GO:0001704//formation of primary germ layer;GO:0032924//activin receptor signaling pathway;GO:0043009//chordate embryonic development;GO:0006954//inflammatory response;GO:000…	K04675//activin receptor type-1 [EC:2.7.11.30]	gi|927209965|ref|XP_013839601.1|//PREDICTED: activin receptor type-1 isoform X2 [Sus scrofa]
150165	1705	8	65	2.87828	9.1989e-12	Up	1.57452e-11	XKR3	GO:0031224//intrinsic component of membrane	NA	NA	K19522//membrane transport protein XK	gi|103471991|ref|NP_787074.2|//XK-related protein 3 [Homo sapiens]
123036	5034	39	313	2.86053	3.4728e-49	Up	3.25461e-49	TC2N	GO:0043231//intracellular membrane-bounded organelle	NA	NA	K17287//tandem C2 domains nuclear protein	gi|574282211|ref|NP_001276063.1|//tandem C2 domains nuclear protein isoform 2 [Homo sapiens];gi|22748725|ref|NP_689545.1|//tandem C2 domains nuclear protein isoform 1 [Homo sapiens]
79414	2549	3	24	2.85591	1.95784e-05	Up	4.50371e-05	LRFN3	GO:0031224//intrinsic component of membrane;GO:0044459//plasma membrane part;GO:0043005//neuron projection	NA	GO:0009987//cellular process	K16356//leucine-rich repeat and fibronectin type-III domain-containing protein 3	gi|13375646|ref|NP_078785.1|//leucine-rich repeat and fibronectin type-III domain-containing protein 3 precursor [Homo sapiens]
2053	2122	2	16	2.85591	0.000343429	Up	0.000864414	EPHX2	GO:0031981//nuclear lumen;GO:0042579//microbody;GO:0005924//cell-substrate adherens junction	GO:0043169//cation binding;GO:0042802//identical protein binding;GO:0016803//ether hydrolase activity	GO:0006875//cellular metal ion homeostasis;GO:0042221//response to chemical;GO:0006952//defense response;GO:0006725//cellular aromatic compound metabolic process;GO:0042311//vasodilation	K08726//soluble epoxide hydrolase / lipid-phosphate phosphatase [EC:3.3.2.10 3.1.3.76]	gi|618854791|pdb|3WK4|A//Chain A, Crystal Structure Of Soluble Epoxide Hydrolase In Complex With Fragment Inhibitor;gi|119583951|gb|EAW63547.1|//epoxide hydrolase 2, cytoplasmic, isoform CRA_a [Homo sapiens]
4211	3198	2	16	2.85591	0.000343429	Up	0.000864414	MEIS1	NA	NA	NA	K15613//homeobox protein Meis1	gi|148675868|gb|EDL07815.1|//myeloid ecotropic viral integration site 1, isoform CRA_a, partial [Mus musculus]
23708	2861	2.03	16	2.83443	0.000358986	Up	0.000904783	GSPT2	GO:0044424//intracellular part	GO:0032561//guanyl ribonucleotide binding;GO:0017111//nucleoside-triphosphatase activity	GO:0006412//translation;GO:0009207//purine ribonucleoside triphosphate catabolic process	K03267//peptide chain release factor subunit 3	gi|46094014|ref|NP_060564.2|//eukaryotic peptide chain release factor GTP-binding subunit ERF3B [Homo sapiens]
3268	4821	16	124	2.81011	2.61128e-20	Up	3.64918e-20	AGFG2	NA	GO:0046914//transition metal ion binding	GO:0032012//regulation of ARF protein signal transduction	K15044//Arf-GAP domain and FG repeats-containing protein 1	gi|91984781|ref|NP_006067.3|//arf-GAP domain and FG repeat-containing protein 2 [Homo sapiens]
939	1320	19	147	2.80766	1.05671e-23	Up	1.37456e-23	CD27	GO:0016021//integral component of membrane	GO:0004872//receptor activity;GO:0005488//binding;GO:0004869//cysteine-type endopeptidase inhibitor activity	GO:0012502//induction of programmed cell death;GO:0045577//regulation of B cell differentiation;GO:0007249//I-kappaB kinase/NF-kappaB signaling;GO:0010033//response to organic substance;GO:0043410//positive regulation of MAPK cascade;GO:0043066//negative regulation of apoptotic process;GO:0019724//B cell mediated immunity	K05144//tumor necrosis factor receptor superfamily member 7	gi|675677492|ref|XP_002752298.2|//PREDICTED: CD27 antigen isoform X1 [Callithrix jacchus]
333926	1762	3	23	2.79451	3.34071e-05	Up	7.81437e-05	PPM1J	NA	GO:0004721//phosphoprotein phosphatase activity	GO:0006464//cellular protein modification process	K17504//protein phosphatase 1J [EC:3.1.3.16]	gi|675671811|ref|XP_009000153.1|//PREDICTED: protein phosphatase 1J [Callithrix jacchus]
728747	3517	3	23	2.79451	3.34071e-05	Up	7.81437e-05	ANKRD20A4	GO:0016020//membrane	NA	NA	K17299//POTE ankyrin domain family protein	gi|149363679|ref|NP_001092275.1|//ankyrin repeat domain-containing protein 20A4 [Homo sapiens]
257068	2063	6	45	2.7628	2.02294e-08	Up	3.96221e-08	PLCXD2	NA	GO:0004620//phospholipase activity;GO:0060089//molecular transducer activity	GO:0007165//signal transduction;GO:0006629//lipid metabolic process	NA	gi|297515471|ref|NP_001172035.1|//PI-PLC X domain-containing protein 2 isoform a [Homo sapiens];gi|355758131|gb|EHH61416.1|//hypothetical protein EGM_19812 [Macaca fascicularis]
7074	7218	6	45	2.7628	2.02294e-08	Up	3.96221e-08	TIAM1	GO:0030054//cell junction;GO:0044444//cytoplasmic part	GO:0008289//lipid binding;GO:0005088//Ras guanyl-nucleotide exchange factor activity;GO:0005102//receptor binding;GO:0004871//signal transducer activity	GO:0007266//Rho protein signal transduction;GO:0007169//transmembrane receptor protein tyrosine kinase signaling pathway;GO:0009966//regulation of signal transduction;GO:0031346//positive regulation of cell projection organization	K05731//T-lymphoma invasion and metastasis-inducing protein 1	gi|115583670|ref|NP_003244.2|//T-lymphoma invasion and metastasis-inducing protein 1 [Homo sapiens]
10243	4219	2	15	2.7628	0.00059137	Up	0.00151856	GPHN	GO:0044459//plasma membrane part;GO:0043232//intracellular non-membrane-bounded organelle	GO:0043169//cation binding;GO:0032559//adenyl ribonucleotide binding;GO:0016772//transferase activity, transferring phosphorus-containing groups	GO:0042559//pteridine-containing compound biosynthetic process;GO:0009108//coenzyme biosynthetic process;GO:0006766//vitamin metabolic process	K15376//gephyrin [EC:2.10.1.1 2.7.7.75]	gi|532074114|ref|XP_005322859.1|//PREDICTED: gephyrin isoform X1 [Ictidomys tridecemlineatus];gi|10880983|ref|NP_065857.1|//gephyrin isoform 1 [Homo sapiens]
10098	3406	2	15	2.7628	0.00059137	Up	0.00151856	TSPAN5	GO:0031224//intrinsic component of membrane	NA	NA	K17345//tetraspanin-5	gi|9625045|ref|NP_062517.1|//tetraspanin-5 [Mus musculus]
121355	822	2	15	2.7628	0.00059137	Up	0.00151856	GTSF1	GO:0044424//intracellular part	GO:0043169//cation binding	NA	K02728//20S proteasome subunit alpha 3 [EC:3.4.25.1]	gi|332207673|ref|XP_003252919.1|//PREDICTED: gametocyte-specific factor 1 isoform X1 [Nomascus leucogenys]
26261	2031	2	15	2.7628	0.00059137	Up	0.00151856	FBXO24	GO:0043234//protein complex	GO:0019787//ubiquitin-like protein transferase activity	GO:0032446//protein modification by small protein conjugation	K10304//F-box protein 24	gi|254553388|ref|NP_036304.2|//F-box only protein 24 isoform 3 [Homo sapiens] ;gi|254553390|ref|NP_001156971.1|//F-box only protein 24 isoform 4 [Homo sapiens] ;gi|15812196|ref|NP_277041.1|//F-box only protein 24 isoform 1 [Homo sapiens]
60675	1605	5120	38288	2.75859	0	Up	0	PROK2	NA	GO:0005102//receptor binding	GO:0007186//G-protein coupled receptor signaling pathway;GO:0000165//MAPK cascade;GO:0007600//sensory perception;GO:0042221//response to chemical;GO:0006939//smooth muscle contraction;GO:0048232//male gamete generation;GO:0043066//negative regulation of apoptotic process;GO:0048511//rhythmic process;GO:0051480//regulation of cytosolic calcium ion concentration;GO:0006952//defense response;GO:0048…	NA	gi|187167261|ref|NP_001119600.1|//prokineticin-2 isoform a precursor [Homo sapiens];gi|17530787|ref|NP_068754.1|//prokineticin-2 isoform b precursor [Homo sapiens]
175	2113	29	123	1.94045	1.17699e-13	Up	1.91502e-13	AGA	GO:0005856//cytoskeleton;GO:0000323//lytic vacuole	GO:0005515//protein binding;GO:0004067//asparaginase activity	GO:0006464//cellular protein modification process;GO:0006530//asparagine catabolic process	K01444//N4-(beta-N-acetylglucosaminyl)-L-asparaginase [EC:3.5.1.26]	gi|285002253|ref|NP_001165459.1|//N(4)-(beta-N-acetylglucosaminyl)-L-asparaginase isoform 2 precursor [Homo sapiens];gi|285002251|ref|NP_000018.2|//N(4)-(beta-N-acetylglucosaminyl)-L-asparaginase isoform 1 preproprotein [Homo sapiens]
240	2561	24334	62850	1.22485	0	Up	0	ALOX5	GO:0034399//nuclear periphery;GO:0005635//nuclear envelope;GO:0005886//plasma membrane;GO:0044444//cytoplasmic part;GO:0043005//neuron projection	GO:0016702//oxidoreductase activity, acting on single donors with incorporation of molecular oxygen, incorporation of two atoms of oxygen;GO:0046914//transition metal ion binding	GO:0006691//leukotriene metabolic process;GO:0000038//very long-chain fatty acid metabolic process;GO:0019229//regulation of vasoconstriction;GO:0009058//biosynthetic process;GO:0007600//sensory perception;GO:0031667//response to nutrient levels;GO:0002538//arachidonic acid metabolite production involved in inflammatory response	K00461//arachidonate 5-lipoxygenase [EC:1.13.11.34]	gi|4502057|ref|NP_000689.1|//arachidonate 5-lipoxygenase isoform 1 [Homo sapiens];gi|371877598|ref|NP_001243083.1|//arachidonate 5-lipoxygenase isoform 3 [Homo sapiens];gi|371877525|ref|NP_001243082.1|//arachidonate 5-lipoxygenase isoform 2 [Homo sapiens]
916	1534	166	1227	2.74179	3.60984e-179	Up	1.75796e-179	CD3E	GO:0042101//T cell receptor complex;GO:0009986//cell surface;GO:0016021//integral component of membrane	GO:0032947//protein complex scaffold activity;GO:0019904//protein domain specific binding;GO:0004872//receptor activity;GO:0019900//kinase binding;GO:0005102//receptor binding;GO:0046983//protein dimerization activity	GO:0008589//regulation of smoothened signaling pathway;GO:0042102//positive regulation of T cell proliferation;GO:0042108//positive regulation of cytokine biosynthetic process;GO:0065003//macromolecular complex assembly;GO:0001819//positive regulation of cytokine production;GO:0007169//transmembrane receptor protein tyrosine kinase signaling pathway;GO:0031294//lymphocyte costimulation;GO:0009967…	K06451//T-cell surface glycoprotein CD3 epsilon chain	gi|4502671|ref|NP_000724.1|//T-cell surface glycoprotein CD3 epsilon chain precursor [Homo sapiens]
57099	1551	3	22	2.73038	5.67977e-05	Up	0.000135236	AVEN	NA	GO:0005488//binding	GO:0043066//negative regulation of apoptotic process	NA	gi|9966841|ref|NP_065104.1|//cell death regulator Aven [Homo sapiens]
1854	1991	82	597	2.71995	1.805e-87	Up	1.28734e-87	DUT	GO:0031981//nuclear lumen	GO:0047429//nucleoside-triphosphate diphosphatase activity;GO:0005488//binding	GO:0009211//pyrimidine deoxyribonucleoside triphosphate metabolic process;GO:0009112//nucleobase metabolic process;GO:0006213//pyrimidine nucleoside metabolic process;GO:0006259//DNA metabolic process	K01520//dUTP pyrophosphatase [EC:3.6.1.23]	gi|635135993|ref|XP_008014904.1|//PREDICTED: deoxyuridine 5'-triphosphate nucleotidohydrolase, mitochondrial isoform X2 [Chlorocebus sabaeus];gi|820989296|ref|XP_003266933.2|//PREDICTED: deoxyuridine 5'-triphosphate nucleotidohydrolase, mitochondrial [Nomascus leucogenys];gi|966951589|ref|XP_001113050.2|//PREDICTED: deoxyuridine 5'-triphosphate nucleotidohydrolase, mitochondrial isoform X1 [Macac…
50943	2397	4	29	2.7139	5.64593e-06	Up	1.25355e-05	FOXP3	GO:0043231//intracellular membrane-bounded organelle;GO:0043234//protein complex	GO:0000981//RNA polymerase II transcription factor activity, sequence-specific DNA binding;GO:0042802//identical protein binding;GO:0046914//transition metal ion binding;GO:0046983//protein dimerization activity;GO:0043566//null;GO:0003712//transcription cofactor activity;GO:0043565//sequence-specific DNA binding;GO:0019899//enzyme binding;GO:0008134//transcription factor binding	GO:0042036//negative regulation of cytokine biosynthetic process;GO:0043433//negative regulation of DNA binding transcription factor activity;GO:0032905//transforming growth factor beta1 production;GO:0000122//negative regulation of transcription from RNA polymerase II promoter;GO:0042130//negative regulation of T cell proliferation;GO:0050707//regulation of cytokine secretion;GO:0002369//T cell …	K10163//forkhead box P3	gi|694984869|ref|XP_009437357.1|//PREDICTED: forkhead box protein P3 [Pan troglodytes];gi|768033208|ref|XP_011542221.1|//PREDICTED: forkhead box protein P3 isoform X5 [Homo sapiens]
4744	3721	4	29	2.7139	5.64593e-06	Up	1.25355e-05	NEFH	GO:0043005//neuron projection	NA	GO:0009987//cellular process	K04574//neurofilament heavy polypeptide	gi|768024958|ref|XP_011528502.1|//PREDICTED: neurofilament heavy polypeptide isoform X1 [Homo sapiens]
288	10757	5	36	2.70391	5.66533e-07	Up	1.19019e-06	ANK3	GO:0044459//plasma membrane part;GO:0043232//intracellular non-membrane-bounded organelle	GO:0005488//binding	GO:0023052//signaling;GO:0051234//establishment of localization	K10380//ankyrin	gi|325053666|ref|NP_001191332.1|//ankyrin-3 isoform 3 [Homo sapiens];gi|325053668|ref|NP_001191333.1|//ankyrin-3 isoform 4 [Homo sapiens];gi|694939988|ref|XP_009456793.1|//PREDICTED: ankyrin-3 isoform X33 [Pan troglodytes];gi|32967599|ref|NP_001140.2|//ankyrin-3 isoform 2 [Homo sapiens];gi|32967601|ref|NP_066267.2|//ankyrin-3 isoform 1 [Homo sapiens]
219348	691	7	50	2.69242	5.85544e-09	Up	1.12071e-08	PLAC9	NA	NA	NA	NA	gi|119600812|gb|EAW80406.1|//placenta-specific 9, isoform CRA_a [Homo sapiens];gi|61175222|ref|NP_001012991.1|//placenta-specific protein 9 precursor [Homo sapiens]
1043	523	100	709	2.6817	5.42852e-102	Up	3.59096e-102	CD52	GO:0016021//integral component of membrane	NA	GO:0051480//regulation of cytosolic calcium ion concentration	K06488//CDW52 antigen	gi|32053|emb|CAA47929.1|//CDw52 antigen [Homo sapiens]
7100	4277	299.73	2100.94	2.66521	2.30983e-296	Up	8.36672e-297	TLR5	GO:0031224//intrinsic component of membrane	GO:0004872//receptor activity;GO:0005126//cytokine receptor binding	GO:0009612//response to mechanical stimulus;GO:0052166//positive regulation by symbiont of host innate immune response;GO:0001774//microglial cell activation;GO:0001819//positive regulation of cytokine production;GO:0002224//toll-like receptor signaling pathway	K10168//toll-like receptor 5	gi|16751843|ref|NP_003259.2|//toll-like receptor 5 precursor [Homo sapiens]
340481	9171	3	21.02	2.66464	9.56177e-05	Up	0.000230837	ZDHHC21	GO:0031224//intrinsic component of membrane;GO:0012505//endomembrane system	GO:0046914//transition metal ion binding	GO:0006807//nitrogen compound metabolic process;GO:0032768//regulation of monooxygenase activity	K18932//palmitoyltransferase [EC:2.3.1.225]	gi|989984194|ref|XP_015450021.1|//PREDICTED: palmitoyltransferase ZDHHC21 isoform X1 [Pteropus alecto]
113540	925	90.53	634.07	2.66409	8.64127e-91	Up	6.04401e-91	CMTM1	GO:0016020//membrane;GO:0031224//intrinsic component of membrane;GO:0044421//extracellular region part	GO:0005102//receptor binding	GO:0042221//response to chemical	NA	gi|31563398|ref|NP_851789.1|//CKLF-like MARVEL transmembrane domain-containing protein 1 isoform 4 [Homo sapiens];gi|148743783|ref|NP_443725.3|//CKLF-like MARVEL transmembrane domain-containing protein 1 isoform 13 [Homo sapiens];gi|31563396|ref|NP_851788.1|//CKLF-like MARVEL transmembrane domain-containing protein 1 isoform 3 [Homo sapiens];gi|31563392|ref|NP_851786.1|//CKLF-like MARVEL transmem…
2273	2331	7	49	2.66327	9.81692e-09	Up	1.89768e-08	FHL1	GO:0016020//membrane;GO:0043231//intracellular membrane-bounded organelle;GO:0044444//cytoplasmic part	GO:0046914//transition metal ion binding	GO:0009653//anatomical structure morphogenesis;GO:0048513//animal organ development;GO:0040007//growth;GO:0048869//cellular developmental process	K14365//four and a half LIM domains protein 1	gi|228480205|ref|NP_001153171.1|//four and a half LIM domains protein 1 isoform 5 [Homo sapiens];gi|635145773|ref|XP_007991001.1|//PREDICTED: four and a half LIM domains protein 1 isoform X5 [Chlorocebus sabaeus];gi|119608883|gb|EAW88477.1|//four and a half LIM domains 1, isoform CRA_b [Homo sapiens];gi|207080154|ref|NP_001128823.1|//four and a half LIM domains protein 1 precursor [Pongo abelii];…
923	3309	88	611	2.65151	4.00948e-87	Up	2.8686e-87	CD6	GO:0016021//integral component of membrane	GO:0004888//transmembrane signaling receptor activity	GO:0009987//cellular process	K06456//T-cell surface glycoprotein CD6	gi|119594328|gb|EAW73922.1|//CD6 antigen, isoform CRA_f [Homo sapiens];gi|194018748|ref|NP_006716.3|//T-cell differentiation antigen CD6 isoform 1 precursor [Homo sapiens];gi|21707164|gb|AAH33755.1|//CD6 protein [Homo sapiens]
1519	2943	8	55	2.63727	1.68456e-09	Up	3.14608e-09	CTSO	GO:0000323//lytic vacuole	GO:0004175//endopeptidase activity;GO:0043168//anion binding;GO:0005515//protein binding	GO:0032502//developmental process;GO:0042221//response to chemical;GO:0019538//protein metabolic process	K01374//cathepsin O [EC:3.4.22.42]	gi|4557501|ref|NP_001325.1|//cathepsin O preproprotein [Homo sapiens]
28959	1444	7	48	2.63352	1.64374e-08	Up	3.20749e-08	TMEM176B	GO:0016020//membrane;GO:0031224//intrinsic component of membrane;GO:0005634//nucleus;GO:0005635//nuclear envelope	NA	GO:0009653//anatomical structure morphogenesis;GO:0048869//cellular developmental process	NA	gi|119574461|gb|EAW54076.1|//LR8 protein, isoform CRA_a [Homo sapiens];gi|966936264|ref|XP_014990688.1|//PREDICTED: transmembrane protein 176B isoform X4 [Macaca mulatta];gi|966936262|ref|XP_014990687.1|//PREDICTED: transmembrane protein 176B isoform X3 [Macaca mulatta]
283849	2505	21	143	2.62347	1.22216e-21	Up	1.6571e-21	EXOC3L1	GO:0043234//protein complex;GO:0016023//null	NA	GO:0016192//vesicle-mediated transport;GO:0002790//peptide secretion	K19987//exocyst complex component 3-like protein	gi|30039190|gb|AAP12545.1|//unknown [Homo sapiens]
55013	1298	9	61	2.61673	2.88554e-10	Up	5.23091e-10	MCUB	GO:0031224//intrinsic component of membrane	NA	NA	NA	gi|194018570|ref|NP_060388.2|//calcium uniporter regulatory subunit MCUb, mitochondrial [Homo sapiens]
64801	1478	4	27	2.6108	1.60146e-05	Up	3.66367e-05	ARV1	GO:0031224//intrinsic component of membrane	NA	GO:0006643//membrane lipid metabolic process	K02998//small subunit ribosomal protein SAe	gi|119590340|gb|EAW69934.1|//ARV1 homolog (yeast), isoform CRA_a [Homo sapiens];gi|12006217|gb|AAG44791.1|AF271780_1//HT035 [Homo sapiens]
4756	7055	11	73	2.58631	8.52075e-12	Up	1.45701e-11	NEO1	GO:0031981//nuclear lumen;GO:0016021//integral component of membrane	GO:0050839//cell adhesion molecule binding;GO:0004871//signal transducer activity	GO:0006935//chemotaxis;GO:0045597//positive regulation of cell differentiation;GO:0000768//syncytium formation by plasma membrane fusion	K06766//neogenin	gi|290655729|ref|NP_001166095.1|//neogenin isoform 3 precursor [Homo sapiens];gi|290656011|ref|NP_001166094.1|//neogenin isoform 2 precursor [Homo sapiens];gi|157311649|ref|NP_002490.2|//neogenin isoform 1 precursor [Homo sapiens]
26119	2935	23	152	2.58028	1.67329e-22	Up	2.2321e-22	LDLRAP1	GO:0005768//endosome;GO:0016323//basolateral plasma membrane;GO:0030130//clathrin coat of trans-Golgi network vesicle;GO:0005882//intermediate filament;GO:0030128//clathrin coat of endocytic vesicle;GO:0043005//neuron projection	GO:0032947//protein complex scaffold activity;GO:0045309//protein phosphorylated amino acid binding;GO:0070325//lipoprotein particle receptor binding;GO:0060090//molecular adaptor activity;GO:0035091//phosphatidylinositol binding	GO:0055092//sterol homeostasis;GO:0051098//regulation of binding;GO:0009100//glycoprotein metabolic process;GO:0007165//signal transduction;GO:0008203//cholesterol metabolic process;GO:0006898//receptor-mediated endocytosis;GO:0045807//positive regulation of endocytosis	K12474//low density lipoprotein receptor adapter protein 1	gi|635110560|ref|XP_007978168.1|//PREDICTED: low density lipoprotein receptor adapter protein 1 isoform X1 [Chlorocebus sabaeus]
10395	5786	5	33	2.57838	2.68129e-06	Up	5.84014e-06	DLC1	GO:0043231//intracellular membrane-bounded organelle;GO:0032432//actin filament bundle;GO:0044444//cytoplasmic part;GO:0005924//cell-substrate adherens junction	GO:0019904//protein domain specific binding;GO:0008092//cytoskeletal protein binding;GO:0019899//enzyme binding	GO:0012502//induction of programmed cell death;GO:0014020//primary neural tube formation;GO:0016477//cell migration;GO:0007044//cell-substrate junction assembly;GO:0065008//regulation of biological quality;GO:0032868//response to insulin;GO:0007420//brain development;GO:0006915//apoptotic process;GO:0010863//positive regulation of phospholipase C activity;GO:0009887//animal organ morphogenesis;GO…	K10360//myosin IX	gi|33188437|ref|NP_006085.2|//rho GTPase-activating protein 7 isoform 2 [Homo sapiens];gi|256017148|ref|NP_872584.2|//rho GTPase-activating protein 7 isoform 1 [Homo sapiens];gi|256017150|ref|NP_079043.3|//rho GTPase-activating protein 7 isoform 3 [Homo sapiens];gi|939699139|ref|NP_001303597.1|//rho GTPase-activating protein 7 isoform 5 [Homo sapiens]
145864	1983	9	59	2.56863	7.99594e-10	Up	1.47355e-09	HAPLN3	GO:0031012//extracellular matrix	GO:0005539//glycosaminoglycan binding	GO:0009987//cellular process	K06852//hyaluronan and proteoglycan link protein 3	gi|808154260|ref|NP_001294881.1|//hyaluronan and proteoglycan link protein 3 isoform 1 [Homo sapiens];gi|767983379|ref|XP_011519563.1|//PREDICTED: hyaluronan and proteoglycan link protein 3 isoform X2 [Homo sapiens]
554282	2338	3.69	24.19	2.56863	4.56484e-05	Up	0.000107894	FAM72C	NA	NA	NA	K14284//nuclear RNA export factor	gi|565324168|ref|NP_001274314.1|//protein FAM72C [Homo sapiens];gi|426331050|ref|XP_004026511.1|//PREDICTED: protein FAM72D-like [Gorilla gorilla gorilla];gi|767909763|ref|XP_011508025.1|//PREDICTED: protein FAM72C isoform X1 [Homo sapiens];gi|767909765|ref|XP_011508026.1|//PREDICTED: protein FAM72C isoform X2 [Homo sapiens]
57579	5958	22	144	2.56641	2.65628e-21	Up	3.62771e-21	FAM135A	NA	NA	NA	NA	gi|675703180|ref|XP_008960054.1|//PREDICTED: protein FAM135A isoform X9 [Pan paniscus];gi|242117946|ref|NP_001156001.1|//protein FAM135A isoform c [Homo sapiens];gi|157671937|ref|NP_001099001.1|//protein FAM135A isoform a [Homo sapiens];gi|530383202|ref|XP_005248805.1|//PREDICTED: protein FAM135A isoform X4 [Homo sapiens];gi|157671939|ref|NP_065870.3|//protein FAM135A isoform b [Homo sapiens];gi|…
4778	1731	2759	17971	2.55937	0	Up	0	NFE2	GO:0005856//cytoskeleton;GO:0005654//nucleoplasm	GO:0003677//DNA binding;GO:0019904//protein domain specific binding;GO:0003712//transcription cofactor activity	GO:0034728//nucleosome organization;GO:0006355//regulation of transcription, DNA-templated;GO:0003013//circulatory system process;GO:0007599//hemostasis	K09039//nuclear factor erythroid 2	gi|918619536|ref|XP_013376248.1|//PREDICTED: transcription factor NF-E2 45 kDa subunit [Chinchilla lanigera];gi|5453774|ref|NP_006154.1|//transcription factor NF-E2 45 kDa subunit [Homo sapiens]
2038	2464	4	26	2.55635	2.68215e-05	Up	6.23621e-05	EPB42	GO:0016020//membrane;GO:0005856//cytoskeleton	GO:0032559//adenyl ribonucleotide binding;GO:0005198//structural molecule activity;GO:0016755//transferase activity, transferring amino-acyl groups	GO:0048469//cell maturation;GO:0032989//cellular component morphogenesis;GO:0006464//cellular protein modification process;GO:0055080//cation homeostasis;GO:0048534//hematopoietic or lymphoid organ development	K05622//transglutaminase 5 [EC:2.3.2.13];K05625//transglutaminase 2 [EC:2.3.2.13]	gi|166362737|ref|NP_001107606.1|//erythrocyte membrane protein band 4.2 isoform 2 [Homo sapiens];gi|166362735|ref|NP_000110.2|//erythrocyte membrane protein band 4.2 isoform 1 [Homo sapiens]
8348	467	2.4	15.57	2.55358	0.000754205	Up	0.00195896	HIST1H2BO	NA	NA	NA	K11254//histone H4;K11253//histone H3;K11252//histone H2B	gi|344238174|gb|EGV94277.1|//Histone H2B type 1 [Cricetulus griseus]
10174	2057	22	142	2.54623	7.26291e-21	Up	1.00129e-20	SORBS3	GO:0043231//intracellular membrane-bounded organelle;GO:0043232//intracellular non-membrane-bounded organelle;GO:0044444//cytoplasmic part;GO:0005924//cell-substrate adherens junction	GO:0008092//cytoskeletal protein binding;GO:0005198//structural molecule activity	GO:0003012//muscle system process;GO:0032233//positive regulation of actin filament bundle assembly	K06086//sorbin and SH3 domain containing 1	gi|155030230|ref|NP_005766.3|//vinexin isoform 1 [Homo sapiens];gi|119584080|gb|EAW63676.1|//sorbin and SH3 domain containing 3, isoform CRA_d [Homo sapiens]
782	3503	9	58	2.54397	1.3267e-09	Up	2.46693e-09	CACNB1	GO:0005783//endoplasmic reticulum;GO:0042383//sarcolemma;GO:0034704//calcium channel complex;GO:0005886//plasma membrane	GO:0005245//voltage-gated calcium channel activity;GO:0005262//calcium channel activity;GO:0005488//binding	GO:0006605//protein targeting;GO:0032412//regulation of ion transmembrane transporter activity;GO:0006816//calcium ion transport;GO:0006935//chemotaxis	K04862//voltage-dependent calcium channel beta-1	gi|179802|gb|AAA35631.1|//voltage-dependent calcium channel beta-1 subunit [Homo sapiens];gi|40804468|ref|NP_000714.3|//voltage-dependent L-type calcium channel subunit beta-1 isoform 1 [Homo sapiens];gi|179804|gb|AAA35632.1|//voltage-dependent calcium channel beta-1 subunit [Homo sapiens]
8330	460	4.82	31.03	2.54247	5.8335e-06	Up	1.29716e-05	HIST1H2AK	NA	NA	NA	K11251//histone H2A	gi|528763464|gb|EPY83123.1|//histone H2A type 1-like protein [Camelus ferus]
55188	5066	7	45	2.54041	7.61377e-08	Up	1.53064e-07	RIC8B	GO:0016020//membrane;GO:0044444//cytoplasmic part	GO:0005515//protein binding;GO:0030695//GTPase regulator activity	GO:0007186//G-protein coupled receptor signaling pathway	NA	gi|544472643|ref|XP_005572167.1|//PREDICTED: synembryn-B isoform X2 [Macaca fascicularis];gi|95113666|ref|NP_060627.2|//synembryn-B [Homo sapiens];gi|410047183|ref|XP_003952332.1|//PREDICTED: synembryn-B isoform X1 [Pan troglodytes]
2026	2423	15	96	2.53399	1.21715e-14	Up	1.92496e-14	ENO2	GO:0016020//membrane;GO:0043234//protein complex;GO:0044444//cytoplasmic part;GO:0043025//neuronal cell body	GO:0046872//metal ion binding;GO:0016836//hydro-lyase activity;GO:0042802//identical protein binding;GO:0046983//protein dimerization activity	GO:0006007//glucose catabolic process;GO:0043627//response to estrogen	K01689//enolase [EC:4.2.1.11]	gi|831237054|ref|XP_012664786.1|//PREDICTED: gamma-enolase isoform X2 [Otolemur garnettii]
64919	7828	59	376	2.52786	1.12255e-51	Up	1.02395e-51	BCL11B	GO:0043231//intracellular membrane-bounded organelle;GO:0005622//intracellular	GO:0046872//metal ion binding;GO:0046914//transition metal ion binding	GO:0006357//regulation of transcription from RNA polymerase II promoter	K09228//KRAB domain-containing zinc finger protein	gi|795387067|ref|XP_011939302.1|//PREDICTED: B-cell lymphoma/leukemia 11B isoform X4 [Cercocebus atys];gi|12597635|ref|NP_075049.1|//B-cell lymphoma/leukemia 11B isoform 2 [Homo sapiens];gi|544449401|ref|XP_005562237.1|//PREDICTED: B-cell lymphoma/leukemia 11B isoform X1 [Macaca fascicularis];gi|795387061|ref|XP_011939300.1|//PREDICTED: B-cell lymphoma/leukemia 11B isoform X2 [Cercocebus atys]
257101	1684	11	70	2.52577	3.87044e-11	Up	6.78901e-11	ZNF683	GO:0043231//intracellular membrane-bounded organelle	GO:0046914//transition metal ion binding;GO:0003676//nucleic acid binding	NA	K09228//KRAB domain-containing zinc finger protein	gi|767903625|ref|XP_011539498.1|//PREDICTED: zinc finger protein 683 isoform X2 [Homo sapiens];gi|332808102|ref|XP_513231.3|//PREDICTED: zinc finger protein 683 isoform X2 [Pan troglodytes];gi|694884232|ref|XP_009449542.1|//PREDICTED: zinc finger protein 683 isoform X1 [Pan troglodytes]
648	3435	8.21	52.07	2.52091	9.78026e-09	Up	1.89032e-08	BMI1	NA	NA	NA	K11459//polycomb group RING finger protein 4	gi|929428759|ref|XP_005480372.2|//PREDICTED: polycomb complex protein BMI-1 [Zonotrichia albicollis]
161145	4068	6	38	2.51888	7.48853e-07	Up	1.58395e-06	TMEM229B	NA	NA	NA	NA	gi|820971902|ref|XP_012359810.1|//PREDICTED: transmembrane protein 229B isoform X1 [Nomascus leucogenys]
57463	2501	3	19	2.51888	0.000275084	Up	0.000687907	AMIGO1	GO:0031224//intrinsic component of membrane;GO:0043005//neuron projection	NA	GO:0016337//null;GO:0031346//positive regulation of cell projection organization;GO:0007409//axonogenesis;GO:0008366//axon ensheathment	K19511//peroxidase [EC:1.11.1.7]	gi|153791466|ref|NP_065754.2|//amphoterin-induced protein 1 precursor [Homo sapiens]
79026	18836	904	5675	2.50614	0	Up	0	AHNAK	GO:0043231//intracellular membrane-bounded organelle	GO:0005488//binding	GO:0048731//system development	K19326//nesprin-1	gi|795168017|ref|XP_011798092.1|//PREDICTED: uncharacterized protein LOC105512277 [Colobus angolensis palliatus];gi|61743954|ref|NP_001611.1|//neuroblast differentiation-associated protein AHNAK isoform 1 [Homo sapiens]
3142	2308	806	5044	2.50163	0	Up	0	HLX	NA	GO:0003677//DNA binding	GO:0032502//developmental process;GO:0009987//cellular process;GO:0032501//multicellular organismal process	K09339//homeobox protein HLX1	gi|11386181|ref|NP_068777.1|//H2.0-like homeobox protein [Homo sapiens]
26031	6366	16	100	2.49977	5.69119e-15	Up	8.92241e-15	OSBPL3	NA	GO:0005488//binding	GO:0010876//lipid localization;GO:0051234//establishment of localization	K20463//oxysterol-binding protein-related protein 3/6/7	gi|21735580|ref|NP_663160.1|//oxysterol-binding protein-related protein 3 isoform b [Homo sapiens];gi|14149704|ref|NP_056365.1|//oxysterol-binding protein-related protein 3 isoform a [Homo sapiens];gi|21735584|ref|NP_663162.1|//oxysterol-binding protein-related protein 3 isoform d [Homo sapiens];gi|20531141|gb|AAM27390.1|AF491785_1//oxysterol binding protein-related protein 3 isoform 2a [Homo sap…
4501	468	94.67	590.7	2.49736	5.25856e-79	Up	3.92628e-79	MT1X	NA	NA	NA	K14739//metallothionein 1/2	gi|119603291|gb|EAW82885.1|//metallothionein 1X, isoform CRA_a, partial [Homo sapiens]
23462	2305	116	721	2.49179	9.18953e-96	Up	6.27254e-96	HEY1	GO:0043231//intracellular membrane-bounded organelle	GO:0001071//null;GO:0003676//nucleic acid binding	GO:0000122//negative regulation of transcription from RNA polymerase II promoter;GO:0009653//anatomical structure morphogenesis;GO:0007166//cell surface receptor signaling pathway;GO:0048731//system development	K09091//hairy and enhancer of split related with YRPW motif	gi|105990526|ref|NP_001035798.1|//hairy/enhancer-of-split related with YRPW motif protein 1 isoform b [Homo sapiens] ;gi|544583479|ref|NP_001269780.1|//hairy/enhancer-of-split related with YRPW motif protein 1 isoform c [Homo sapiens] ;gi|105990528|ref|NP_036390.3|//hairy/enhancer-of-split related with YRPW motif protein 1 isoform a [Homo sapiens]
121274	4330	971	6031	2.49077	0	Up	0	ZNF641	GO:0031981//nuclear lumen	GO:0046914//transition metal ion binding;GO:0003676//nucleic acid binding	GO:0006351//transcription, DNA-templated	K09228//KRAB domain-containing zinc finger protein	gi|530399742|ref|XP_005268694.1|//PREDICTED: zinc finger protein 641 isoform X3 [Homo sapiens];gi|635064952|ref|XP_008001243.1|//PREDICTED: zinc finger protein 641 isoform X1 [Chlorocebus sabaeus];gi|289547731|ref|NP_689533.2|//zinc finger protein 641 isoform 1 [Homo sapiens]
8722	2032	5	31	2.48818	7.44833e-06	Up	1.6644e-05	CTSF	GO:0000323//lytic vacuole	GO:0004175//endopeptidase activity	GO:0019538//protein metabolic process	K01373//cathepsin F [EC:3.4.22.41]	gi|6042196|ref|NP_003784.2|//cathepsin F precursor [Homo sapiens]
57819	880	30	185	2.4804	6.87208e-26	Up	8.66497e-26	LSM2	NA	NA	NA	K12621//U6 snRNA-associated Sm-like protein LSm2	gi|426352541|ref|XP_004043770.1|//PREDICTED: U6 snRNA-associated Sm-like protein LSm2 [Gorilla gorilla gorilla]
1207	1168	8	49	2.47062	3.53347e-08	Up	6.98734e-08	CLNS1A	GO:0043229//intracellular organelle;GO:0016020//membrane;GO:0043231//intracellular membrane-bounded organelle;GO:0043232//intracellular non-membrane-bounded organelle;GO:0044444//cytoplasmic part	GO:0005488//binding	GO:0006810//transport;GO:0019725//cellular homeostasis;GO:0000398//mRNA splicing, via spliceosome;GO:0003013//circulatory system process;GO:0015698//inorganic anion transport	K05019//chloride channel, nucleotide-sensitive, 1A;K18405//tudor domain-containing protein 1/4/6/7	gi|966987497|ref|XP_014970753.1|//PREDICTED: methylosome subunit pICln [Macaca mulatta];gi|909618065|ref|NP_001298129.1|//methylosome subunit pICln isoform b [Homo sapiens] ;gi|909618069|ref|NP_001298131.1|//methylosome subunit pICln isoform d [Homo sapiens];gi|909618067|ref|NP_001298130.1|//methylosome subunit pICln isoform c [Homo sapiens]
50861	2351	42	257	2.46922	4.78897e-35	Up	5.28342e-35	STMN3	GO:0044424//intracellular part	GO:0005515//protein binding	GO:0016601//Rac protein signal transduction;GO:0033043//regulation of organelle organization;GO:0000226//microtubule cytoskeleton organization;GO:0030030//cell projection organization;GO:0048731//system development	K04381//stathmin	gi|351714867|gb|EHB17786.1|//Stathmin-3 [Heterocephalus glaber];gi|441637954|ref|XP_004090093.1|//PREDICTED: stathmin-3 isoform X2 [Nomascus leucogenys];gi|3243220|gb|AAD12730.1|//SCG10-like-protein [Homo sapiens]
29851	2652	10	61	2.46472	1.01967e-09	Up	1.88598e-09	ICOS	GO:0009986//cell surface;GO:0016021//integral component of membrane	NA	GO:0031294//lymphocyte costimulation	K06713//inducible T-cell co-stimulator	gi|15029518|ref|NP_036224.1|//inducible T-cell costimulator precursor [Homo sapiens]
3695	2878	61	372	2.46434	9.51349e-50	Up	8.87031e-50	ITGB7	GO:0005887//integral component of plasma membrane	GO:0043169//cation binding;GO:0005515//protein binding;GO:0004871//signal transducer activity	GO:0002682//regulation of immune system process;GO:0007166//cell surface receptor signaling pathway;GO:0031589//cell-substrate adhesion;GO:0032501//multicellular organismal process	K06590//integrin beta 7	gi|221043410|dbj|BAH13382.1|//unnamed protein product [Homo sapiens];gi|4504777|ref|NP_000880.1|//integrin beta-7 precursor [Homo sapiens]
306	1634	2441	8336	1.6278	0	Up	0	ANXA3	GO:0030141//secretory granule;GO:0044297//cell body;GO:0030666//endocytic vesicle membrane;GO:0043005//neuron projection	GO:0004859//phospholipase inhibitor activity;GO:0046872//metal ion binding;GO:0005543//phospholipid binding	GO:0021543//pallium development;GO:0002283//neutrophil activation involved in immune response;GO:0031960//response to corticosteroid;GO:0010604//positive regulation of macromolecule metabolic process;GO:0009887//animal organ morphogenesis;GO:0045765//regulation of angiogenesis;GO:0006952//defense response;GO:0006897//endocytosis;GO:0010594//regulation of endothelial cell migration;GO:0043388//pos…	K17089//annexin A3	gi|119626228|gb|EAX05823.1|//annexin A3, isoform CRA_b [Homo sapiens]
6638	1575	11.08	67	2.45212	1.91408e-10	Up	3.44402e-10	SNRPN	GO:0030532//small nuclear ribonucleoprotein complex	GO:0005515//protein binding	GO:0006396//RNA processing;GO:0009719//response to endogenous stimulus	K11100//small nuclear ribonucleoprotein N	gi|675690021|ref|XP_009004277.1|//PREDICTED: small nuclear ribonucleoprotein-associated protein N isoform X2 [Callithrix jacchus]
8631	1598	25	150	2.44088	5.39364e-21	Up	7.41011e-21	SKAP1	GO:0016020//membrane;GO:0043231//intracellular membrane-bounded organelle	GO:0019904//protein domain specific binding;GO:0030674//protein binding, bridging;GO:0019900//kinase binding	GO:0006357//regulation of transcription from RNA polymerase II promoter;GO:0050851//antigen receptor-mediated signaling pathway	K17699//src kinase associated phosphoprotein 1	gi|115527076|ref|NP_001068567.1|//src kinase-associated phosphoprotein 1 isoform 2 [Homo sapiens];gi|115527074|ref|NP_003717.3|//src kinase-associated phosphoprotein 1 isoform 1 [Homo sapiens]
25943	6919	5	30	2.44088	1.23223e-05	Up	2.79718e-05	C20orf194	NA	NA	NA	K01855//tRNA pseudouridine38/39 synthase [EC:5.4.99.45]	gi|149363695|ref|NP_001009984.1|//uncharacterized protein C20orf194 [Homo sapiens]
285704	4601	4	24	2.44088	7.45794e-05	Up	0.000178894	RGMB	NA	NA	NA	K06847//RGM domain family	gi|641707516|ref|XP_008142739.1|//PREDICTED: RGM domain family member B [Eptesicus fuscus]
7533	1807	259	1544	2.43156	2.98343e-197	Up	1.385e-197	YWHAH	GO:0044424//intracellular part	GO:0035258//steroid hormone receptor binding;GO:0008092//cytoskeletal protein binding;GO:0016491//oxidoreductase activity	GO:0031345//negative regulation of cell projection organization;GO:0031958//corticosteroid receptor signaling pathway;GO:0008208//C21-steroid hormone catabolic process;GO:0015031//protein transport;GO:0050804//modulation of chemical synaptic transmission;GO:0006915//apoptotic process;GO:0007067//null;GO:0050767//regulation of neurogenesis;GO:0006584//catecholamine metabolic process	K16198//14-3-3 protein gamma/eta	gi|83754683|pdb|2C63|A//Chain A, 14-3-3 Protein Eta (human) Complexed To Peptide
925	3149	66.38	394.66	2.4277	8.64328e-52	Up	7.86463e-52	CD8A	GO:0009986//cell surface;GO:0016021//integral component of membrane;GO:0043235//receptor complex	GO:0042287//MHC protein binding;GO:0042802//identical protein binding;GO:0004872//receptor activity;GO:0019900//kinase binding	GO:0042110//T cell activation;GO:0002682//regulation of immune system process;GO:0009967//positive regulation of signal transduction;GO:0002449//lymphocyte mediated immunity;GO:0030217//T cell differentiation;GO:0007167//enzyme linked receptor protein signaling pathway;GO:0048583//regulation of response to stimulus	K06458//T-cell surface glycoprotein CD8 alpha chain	gi|194390260|dbj|BAG61892.1|//unnamed protein product [Homo sapiens];gi|397491293|ref|XP_003816603.1|//PREDICTED: T-cell surface glycoprotein CD8 alpha chain isoform X2 [Pan paniscus]
9402	3419	19	112	2.41534	5.61393e-16	Up	8.58988e-16	GRAP2	GO:0044444//cytoplasmic part	GO:0030674//protein binding, bridging	GO:0007264//small GTPase mediated signal transduction;GO:0031294//lymphocyte costimulation;GO:0007154//cell communication;GO:0050851//antigen receptor-mediated signaling pathway	K07366//GRB2-related adaptor protein 2	gi|625180318|ref|NP_001278757.1|//GRB2-related adapter protein 2 isoform 3 [Homo sapiens] ;gi|820992419|ref|XP_003264831.2|//PREDICTED: GRB2-related adapter protein 2 isoform X1 [Nomascus leucogenys];gi|982272007|ref|XP_015312654.1|//PREDICTED: GRB2-related adapter protein 2 isoform X1 [Macaca fascicularis];gi|635102423|ref|XP_007974046.1|//PREDICTED: GRB2-related adapter protein 2 isoform X1 [Ch…
1545	5160	50	294	2.41173	8.49206e-39	Up	8.95361e-39	CYP1B1	GO:0043231//intracellular membrane-bounded organelle;GO:0031090//organelle membrane	GO:0005506//iron ion binding;GO:0016712//oxidoreductase activity, acting on paired donors, with incorporation or reduction of molecular oxygen, reduced flavin or flavoprotein as one donor, and incorporation of one atom of oxygen	GO:0008202//steroid metabolic process;GO:0042221//response to chemical;GO:0050953//sensory perception of light stimulus;GO:0044237//cellular metabolic process;GO:0019748//secondary metabolic process	K07410//cytochrome P450 family 1 subfamily B polypeptide 1 [EC:1.14.14.1]	gi|189491763|ref|NP_000095.2|//cytochrome P450 1B1 [Homo sapiens]
283358	3438	18	105	2.40023	5.35481e-15	Up	8.38752e-15	B4GALNT3	GO:0031224//intrinsic component of membrane;GO:0000139//Golgi membrane	GO:0008376//acetylgalactosaminyltransferase activity	NA	K09656//beta-1,4-N-acetylgalactosaminyltransferase 3 [EC:2.4.1.244]	gi|71043500|ref|NP_775864.3|//beta-1,4-N-acetylgalactosaminyltransferase 3 [Homo sapiens]
23423	1495	6	35	2.40023	3.38493e-06	Up	7.42413e-06	TMED3	GO:0043231//intracellular membrane-bounded organelle;GO:0031224//intrinsic component of membrane;GO:0005793//endoplasmic reticulum-Golgi intermediate compartment	NA	GO:0006810//transport	K20350//p24 family protein gamma-4	gi|194387406|dbj|BAG60067.1|//unnamed protein product [Homo sapiens];gi|667714442|ref|NP_001288132.1|//transmembrane emp24 domain-containing protein 3 isoform b precursor [Homo sapiens];gi|6679189|ref|NP_031390.1|//transmembrane emp24 domain-containing protein 3 isoform a precursor [Homo sapiens]
7881	3533	5	29	2.39197	2.03461e-05	Up	4.68547e-05	KCNAB1	GO:0031224//intrinsic component of membrane;GO:0044424//intracellular part	GO:0005267//potassium channel activity;GO:0016247//channel regulator activity;GO:0003824//catalytic activity;GO:0005488//binding	GO:0008152//metabolic process;GO:0034220//ion transmembrane transport;GO:0030001//metal ion transport	K04882//potassium voltage-gated channel Shaker-related subfamily A, beta member 1	gi|8393643|ref|NP_058999.1|//voltage-gated potassium channel subunit beta-1 [Rattus norvegicus];gi|815891018|ref|NP_001295151.1|//voltage-gated potassium channel subunit beta-1 isoform 5 [Homo sapiens] ;gi|27436962|ref|NP_003462.2|//voltage-gated potassium channel subunit beta-1 isoform 2 [Homo sapiens];gi|27436966|ref|NP_751892.1|//voltage-gated potassium channel subunit beta-1 isoform 1 [Homo s…
4494	456	11.28	65.42	2.39188	5.31632e-10	Up	9.7166e-10	MT1F	NA	NA	NA	K14739//metallothionein 1/2	gi|6683749|gb|AAF23355.1|AF078844_1//hqp0376 protein [Homo sapiens]
3017	758	113.21	655.89	2.39037	2.69125e-83	Up	1.96176e-83	HIST1H2BD	NA	NA	NA	K11252//histone H2B	gi|530381854|ref|XP_005249096.1|//PREDICTED: histone H2B type 1-D isoform X1 [Homo sapiens]
115416	774	79	457	2.38818	1.43135e-58	Up	1.23362e-58	MALSU1	GO:0043231//intracellular membrane-bounded organelle	NA	NA	NA	gi|19923977|ref|NP_612455.1|//mitochondrial assembly of ribosomal large subunit protein 1 [Homo sapiens]
100527963	794	15.04	86.87	2.38597	1.19302e-12	Up	1.99006e-12	PMF1-BGLAP	GO:0043231//intracellular membrane-bounded organelle;GO:0044421//extracellular region part;GO:0005783//endoplasmic reticulum;GO:0000777//condensed chromosome kinetochore;GO:0044444//cytoplasmic part;GO:0031982//vesicle	GO:0046872//metal ion binding;GO:0030275//LRR domain binding;GO:0003712//transcription cofactor activity;GO:0005198//structural molecule activity	GO:0001649//osteoblast differentiation;GO:0014070//response to organic cyclic compound;GO:0009888//tissue development;GO:0006351//transcription, DNA-templated;GO:0033280//response to vitamin D;GO:0009628//response to abiotic stimulus;GO:0007067//null;GO:0002761//regulation of myeloid leukocyte differentiation;GO:0007568//aging;GO:0030278//regulation of ossification;GO:0031960//response to cortico…	K11546//polyamine-modulated factor 1	gi|313851072|ref|NP_001186592.1|//PMF1-BGLAP protein isoform 3 [Homo sapiens];gi|313851074|ref|NP_001186593.1|//PMF1-BGLAP protein isoform 4 [Homo sapiens];gi|314122171|ref|NP_001186591.1|//PMF1-BGLAP protein isoform 2 [Homo sapiens];gi|313851069|ref|NP_001186590.1|//PMF1-BGLAP protein isoform 1 [Homo sapiens]
2530	4749	4	23	2.37948	0.000123755	Up	0.000301303	FUT8	GO:0031224//intrinsic component of membrane;GO:0000139//Golgi membrane	GO:0019904//protein domain specific binding;GO:0046921//alpha-(1->6)-fucosyltransferase activity	GO:0009311//oligosaccharide metabolic process;GO:0048870//cell motility;GO:0006487//protein N-linked glycosylation;GO:0019317//fucose catabolic process;GO:0007178//transmembrane receptor protein serine/threonine kinase signaling pathway;GO:0043009//chordate embryonic development	K00717//glycoprotein 6-alpha-L-fucosyltransferase [EC:2.4.1.68]	gi|18265338|dbj|BAB40929.2|//alpha 1,6-fucosyltransferase [Homo sapiens];gi|30410726|ref|NP_835368.1|//alpha-(1,6)-fucosyltransferase isoform a [Homo sapiens]
144195	3650	140.69	801.12	2.36541	4.36149e-100	Up	2.90841e-100	SLC2A14	GO:0031224//intrinsic component of membrane	GO:0051183//null;GO:0005355//glucose transmembrane transporter activity	GO:0051180//vitamin transport;GO:0006766//vitamin metabolic process;GO:0044238//primary metabolic process;GO:0048232//male gamete generation;GO:0008645//hexose transport;GO:0048869//cellular developmental process	K08142//MFS transporter, SP family, solute carrier family 2 (facilitated glucose transporter), member 3	gi|555943790|ref|NP_001273163.1|//solute carrier family 2, facilitated glucose transporter member 14 isoform b [Homo sapiens];gi|555943884|ref|NP_001273166.1|//solute carrier family 2, facilitated glucose transporter member 14 isoform d [Homo sapiens] ;gi|23592238|ref|NP_703150.1|//solute carrier family 2, facilitated glucose transporter member 14 isoform a [Homo sapiens];gi|555943829|ref|NP_0012…
4824	3281	92	522	2.36026	9.84385e-66	Up	8.01652e-66	NKX3-1	GO:0043231//intracellular membrane-bounded organelle	GO:0035258//steroid hormone receptor binding;GO:0003707//steroid hormone receptor activity;GO:0043565//sequence-specific DNA binding;GO:0001071//null	GO:0050673//epithelial cell proliferation;GO:0035272//exocrine system development;GO:0007346//regulation of mitotic cell cycle;GO:0009968//negative regulation of signal transduction;GO:0030850//prostate gland development;GO:0001763//morphogenesis of a branching structure;GO:0060740//prostate gland epithelium morphogenesis;GO:0048522//positive regulation of cellular process;GO:0048523//negative re…	K09348//homeobox protein Nkx-3.1	gi|19923352|ref|NP_006158.2|//homeobox protein Nkx-3.1 isoform 1 [Homo sapiens];gi|373432628|ref|NP_001243268.1|//homeobox protein Nkx-3.1 isoform 2 [Homo sapiens]
7580	1163	3	17	2.35841	0.000767699	Up	0.00199509	ZNF32	GO:0043231//intracellular membrane-bounded organelle	GO:0046914//transition metal ion binding;GO:0003676//nucleic acid binding	NA	K09228//KRAB domain-containing zinc finger protein	gi|24307925|ref|NP_008904.1|//zinc finger protein 32 [Homo sapiens];gi|119607016|gb|EAW86610.1|//zinc finger protein 32 (KOX 30), isoform CRA_b [Homo sapiens]
3690	4894	3	17	2.35841	0.000767699	Up	0.00199509	ITGB3	GO:0030667//secretory granule membrane;GO:0009986//cell surface;GO:0005887//integral component of plasma membrane;GO:0043234//protein complex	GO:0005172//vascular endothelial growth factor receptor binding;GO:0004871//signal transducer activity	GO:0034329//cell junction assembly;GO:0006869//lipid transport;GO:0007166//cell surface receptor signaling pathway;GO:0002376//immune system process;GO:0045860//positive regulation of protein kinase activity;GO:0001934//positive regulation of protein phosphorylation;GO:0032844//regulation of homeostatic process;GO:0006935//chemotaxis;GO:0010594//regulation of endothelial cell migration;GO:0007599…	K06493//integrin beta 3	gi|47078292|ref|NP_000203.2|//integrin beta-3 precursor [Homo sapiens]
6855	2449	42	237	2.35234	8.5936e-31	Up	1.00556e-30	SYP	GO:0032991//macromolecular complex;GO:0031224//intrinsic component of membrane;GO:0044459//plasma membrane part;GO:0030672//synaptic vesicle membrane	GO:0046872//metal ion binding;GO:0019904//protein domain specific binding;GO:0032934//sterol binding;GO:0019905//syntaxin binding	GO:0016050//vesicle organization;GO:0048168//regulation of neuronal synaptic plasticity;GO:0051234//establishment of localization	K14168//cytoplasmic tRNA 2-thiolation protein 1 [EC:2.7.7.-]	gi|635143561|ref|XP_007989872.1|//PREDICTED: synaptophysin isoform X2 [Chlorocebus sabaeus]
2850	2657	1121.8	6320.37	2.35011	0	Up	0	GPR27	GO:0016020//membrane	GO:0004871//signal transducer activity	GO:0007166//cell surface receptor signaling pathway	K04301//G protein-coupled receptor 27	gi|9506747|ref|NP_061844.1|//probable G-protein coupled receptor 27 [Homo sapiens]
2050	4369	246	1383	2.34699	8.81179e-170	Up	4.43488e-170	EPHB4	GO:0016021//integral component of membrane	GO:0032559//adenyl ribonucleotide binding;GO:0004714//transmembrane receptor protein tyrosine kinase activity	GO:0006464//cellular protein modification process;GO:0007167//enzyme linked receptor protein signaling pathway;GO:0022603//regulation of anatomical structure morphogenesis	K05113//Eph receptor B4 [EC:2.7.10.1]	gi|397483514|ref|XP_003812946.1|//PREDICTED: ephrin type-B receptor 4 isoform X2 [Pan paniscus]
8743	1944	2267.21	12735.2	2.34574	0	Up	0	TNFSF10	GO:0044421//extracellular region part;GO:0016021//integral component of membrane	GO:0043169//cation binding;GO:0032813//tumor necrosis factor receptor superfamily binding	GO:0007249//I-kappaB kinase/NF-kappaB signaling;GO:0002376//immune system process;GO:0007154//cell communication	K04721//tumor necrosis factor ligand superfamily member 10	gi|332214787|ref|XP_003256517.1|//PREDICTED: tumor necrosis factor ligand superfamily member 10 isoform X3 [Nomascus leucogenys];gi|4507593|ref|NP_003801.1|//tumor necrosis factor ligand superfamily member 10 isoform 1 [Homo sapiens];gi|444720132|gb|ELW60917.1|//Tumor necrosis factor ligand superfamily member 10 [Tupaia chinensis]
59352	3345	13	73	2.3453	9.68519e-11	Up	1.7247e-10	LGR6	GO:0031224//intrinsic component of membrane	GO:0004930//G-protein coupled receptor activity	NA	K08399//leucine-rich repeat-containing G protein-coupled receptor 6	gi|62912474|ref|NP_001017404.1|//leucine-rich repeat-containing G-protein coupled receptor 6 isoform 3 [Homo sapiens];gi|62912470|ref|NP_001017403.1|//leucine-rich repeat-containing G-protein coupled receptor 6 isoform 1 precursor [Homo sapiens];gi|62912472|ref|NP_067649.2|//leucine-rich repeat-containing G-protein coupled receptor 6 isoform 2 [Homo sapiens]
154075	1891	15	84	2.34134	4.62758e-12	Up	7.8479e-12	SAMD3	NA	NA	NA	NA	gi|464397210|ref|NP_001264114.1|//sterile alpha motif domain-containing protein 3 isoform 3 [Homo sapiens]
7096	2867	4458.81	24712.9	2.32645	0	Up	0	TLR1	GO:0030666//endocytic vesicle membrane;GO:0043234//protein complex;GO:0016021//integral component of membrane	GO:0004872//receptor activity;GO:0046983//protein dimerization activity	GO:0071221//cellular response to bacterial lipopeptide;GO:0006952//defense response;GO:0023052//signaling;GO:0042108//positive regulation of cytokine biosynthetic process;GO:0070340//detection of bacterial lipopeptide;GO:0002274//myeloid leukocyte activation	K05398//toll-like receptor 1	gi|41350337|ref|NP_003254.2|//toll-like receptor 1 precursor [Homo sapiens]
5790	917	67	371	2.3251	1.74486e-46	Up	1.68671e-46	PTPRCAP	GO:0016020//membrane	NA	GO:0006950//response to stress	NA	gi|119595028|gb|EAW74622.1|//protein tyrosine phosphatase, receptor type, C-associated protein, partial [Homo sapiens]
114907	6435	21	116	2.32158	8.1671e-16	Up	1.2547e-15	FBXO32	NA	NA	NA	K10305//F-box protein 25/32	gi|72679811|gb|AAI00021.1|//FBXO32 protein, partial [Homo sapiens];gi|635050006|ref|XP_007999672.1|//PREDICTED: F-box only protein 32 [Chlorocebus sabaeus];gi|335057520|ref|NP_001229392.1|//F-box only protein 32 isoform 3 [Homo sapiens]
9022	813	6	33	2.31535	9.11302e-06	Up	2.04843e-05	CLIC3	GO:0043231//intracellular membrane-bounded organelle;GO:0034702//ion channel complex	GO:0005254//chloride channel activity;GO:0005488//binding	GO:0023052//signaling;GO:0015698//inorganic anion transport	K05023//chloride intracellular channel protein 3	gi|40288290|ref|NP_004660.2|//chloride intracellular channel protein 3 [Homo sapiens]
8362	354	7	38	2.29649	2.48604e-06	Up	5.4037e-06	HIST1H4K	NA	NA	NA	K11253//histone H3;K11254//histone H4	gi|444523279|gb|ELV13502.1|//Histone H2B type 1-M [Tupaia chinensis]
2625	3067	41	222	2.29278	3.78367e-28	Up	4.60495e-28	GATA3	GO:0031981//nuclear lumen;GO:0000785//chromatin	GO:0046872//metal ion binding;GO:0019904//protein domain specific binding	GO:0032502//developmental process;GO:0048545//response to steroid hormone;GO:0006950//response to stress;GO:0007599//hemostasis	K17895//GATA-binding protein 3	gi|50541959|ref|NP_001002295.1|//trans-acting T-cell-specific transcription factor GATA-3 isoform 1 [Homo sapiens];gi|4503929|ref|NP_002042.1|//trans-acting T-cell-specific transcription factor GATA-3 isoform 2 [Homo sapiens]
3001	913	32	173	2.29054	2.48826e-22	Up	3.32902e-22	GZMA	GO:0043231//intracellular membrane-bounded organelle;GO:0044459//plasma membrane part	GO:0004175//endopeptidase activity;GO:0042802//identical protein binding	GO:0032071//regulation of endodeoxyribonuclease activity;GO:0002376//immune system process;GO:0043086//negative regulation of catalytic activity;GO:0051100//negative regulation of binding	K01352//granzyme A [EC:3.4.21.78]	gi|5453676|ref|NP_006135.1|//granzyme A precursor [Homo sapiens]
931	3331	5	27	2.28887	5.46713e-05	Up	0.00013005	MS4A1	GO:0009986//cell surface;GO:0016021//integral component of membrane	NA	GO:0046649//lymphocyte activation	K06466//B-lymphocyte antigen CD20	gi|23110987|ref|NP_068769.2|//B-lymphocyte antigen CD20 [Homo sapiens]
283710	1040	5	27	2.28887	5.46713e-05	Up	0.00013005	LOC283710	NA	NA	NA	NA	gi|820989587|ref|XP_012362652.1|//PREDICTED: LOW QUALITY PROTEIN: uncharacterized protein LOC101177132 [Nomascus leucogenys]
9314	2908	483	2594	2.281	4.01161e-306	Up	1.40688e-306	KLF4	GO:0043231//intracellular membrane-bounded organelle	GO:0043565//sequence-specific DNA binding;GO:0046914//transition metal ion binding;GO:0008134//transcription factor binding;GO:0001134//transcription factor activity, transcription factor recruiting;GO:0001071//null	GO:0001709//cell fate determination;GO:0008283//cell proliferation;GO:0050793//regulation of developmental process	K17846//krueppel-like factor 4	gi|930697457|ref|NP_001300981.1|//Krueppel-like factor 4 isoform 1 [Homo sapiens];gi|795198792|ref|XP_011803634.1|//PREDICTED: Krueppel-like factor 4 [Colobus angolensis palliatus]
317	6644	2774.29	9352.54	1.60915	0	Up	0	APAF1	GO:0031981//nuclear lumen;GO:0044444//cytoplasmic part	GO:0032559//adenyl ribonucleotide binding;GO:0016505//peptidase activator activity involved in apoptotic process	GO:0006950//response to stress;GO:0006919//activation of cysteine-type endopeptidase activity involved in apoptotic process;GO:0048731//system development	K02084//apoptotic protease-activating factor	gi|4502123|ref|NP_001151.1|//apoptotic protease-activating factor 1 isoform b [Homo sapiens];gi|32483361|ref|NP_863658.1|//apoptotic protease-activating factor 1 isoform d [Homo sapiens];gi|953267333|pdb|3JBT|A//Chain A, Atomic Structure Of The Apaf-1 Apoptosome;gi|32483363|ref|NP_863659.1|//apoptotic protease-activating factor 1 isoform e [Homo sapiens];gi|7108333|ref|NP_037361.1|//apoptotic pro…
56957	6415	11	59	2.27913	8.7291e-09	Up	1.68372e-08	OTUD7B	GO:0005856//cytoskeleton;GO:0043231//intracellular membrane-bounded organelle	GO:0070011//peptidase activity, acting on L-amino acid peptides;GO:0016790//thiolester hydrolase activity;GO:0046914//transition metal ion binding;GO:0003676//nucleic acid binding	GO:0070646//protein modification by small protein removal;GO:0007249//I-kappaB kinase/NF-kappaB signaling	K11860//OTU domain-containing protein 7 [EC:3.4.19.12]	gi|9367763|emb|CAB97494.1|//zinc finger protein Cezanne [Homo sapiens]
1741	4544	6	32	2.27095	1.48367e-05	Up	3.38545e-05	DLG3	GO:0030425//dendrite;GO:0016020//membrane;GO:0044297//cell body;GO:0030427//site of polarized growth;GO:0044430//cytoskeletal part	GO:0035254//glutamate receptor binding;GO:0019904//protein domain specific binding;GO:0016776//phosphotransferase activity, phosphate group as acceptor;GO:0005488//binding	GO:0008283//cell proliferation;GO:0007267//cell-cell signaling;GO:0006935//chemotaxis	K12075//discs large protein 2	gi|62088236|dbj|BAD92565.1|//synapse-associated protein 102 variant [Homo sapiens];gi|953892387|ref|XP_014584460.1|//PREDICTED: LOW QUALITY PROTEIN: disks large homolog 3 [Equus caballus];gi|532110666|ref|XP_005340039.1|//PREDICTED: disks large homolog 3 isoform X4 [Ictidomys tridecemlineatus]
642799	1088	14.17	75.56	2.2707	1.05783e-10	Up	1.88732e-10	NPIPA2	GO:0005635//nuclear envelope	NA	GO:0050658//RNA transport	NA	gi|472339064|ref|NP_001264252.1|//nuclear pore complex-interacting protein family member A3 [Homo sapiens]
994	3291	111	590	2.26607	1.31468e-70	Up	1.03443e-70	CDC25B	GO:0031981//nuclear lumen;GO:0015630//microtubule cytoskeleton;GO:0044444//cytoplasmic part	GO:0004721//phosphoprotein phosphatase activity;GO:0005488//binding	GO:0007127//meiosis I;GO:0006464//cellular protein modification process;GO:0008283//cell proliferation;GO:0003006//developmental process involved in reproduction;GO:0000087//mitotic M phase;GO:0033674//positive regulation of kinase activity	K05866//M-phase inducer phosphatase 2 [EC:3.1.3.48]	gi|426390820|ref|XP_004061796.1|//PREDICTED: M-phase inducer phosphatase 2 isoform 1 [Gorilla gorilla gorilla];gi|11641411|ref|NP_068658.1|//M-phase inducer phosphatase 2 isoform 3 [Homo sapiens];gi|566559978|ref|NP_001274446.1|//M-phase inducer phosphatase 2 isoform 5 [Homo sapiens] ;gi|566559976|ref|NP_001274445.1|//M-phase inducer phosphatase 2 isoform 4 [Homo sapiens] ;gi|566559980|ref|NP_001…
158586	5651	13	68.89	2.2617	7.04594e-10	Up	1.2957e-09	ZXDB	GO:0043231//intracellular membrane-bounded organelle	GO:0019904//protein domain specific binding;GO:0046914//transition metal ion binding;GO:0001071//null	GO:0010467//gene expression	K10485//BTB/POZ domain-containing protein 13 (germ cell-less protein-like 1)	gi|795099505|ref|XP_011829054.1|//PREDICTED: zinc finger X-linked protein ZXDB [Mandrillus leucophaeus]
3075	4200	4.44	23.44	2.25626	0.000166427	Up	0.000408844	CFH	GO:0044421//extracellular region part	NA	GO:0006956//complement activation	K04004//complement factor H	gi|62739186|ref|NP_000177.2|//complement factor H isoform a precursor [Homo sapiens]
3672	4811	83	437.74	2.25481	1.396e-52	Up	1.26161e-52	ITGA1	GO:0030141//secretory granule;GO:0042995//cell projection;GO:0009986//cell surface;GO:0005887//integral component of plasma membrane;GO:0043025//neuronal cell body	GO:0005102//receptor binding;GO:0004871//signal transducer activity;GO:0046983//protein dimerization activity	GO:0000165//MAPK cascade;GO:0003012//muscle system process;GO:0030595//leukocyte chemotaxis;GO:0050880//regulation of blood vessel size;GO:0031589//cell-substrate adhesion;GO:0007166//cell surface receptor signaling pathway;GO:0048858//cell projection morphogenesis;GO:0043065//positive regulation of apoptotic process	K06480//integrin alpha 1	gi|31657142|ref|NP_852478.1|//integrin alpha-1 precursor [Homo sapiens]
788	1909	60	315	2.24823	2.93773e-38	Up	3.12052e-38	SLC25A20	GO:0043231//intracellular membrane-bounded organelle;GO:0031224//intrinsic component of membrane;GO:0019866//organelle inner membrane	GO:0022891//null	GO:0019217//regulation of fatty acid metabolic process;GO:0003333//amino acid transmembrane transport;GO:0051181//cofactor transport	K15109//solute carrier family 25 (mitochondrial carnitine/acylcarnitine transporter), member 20/29	gi|4557403|ref|NP_000378.1|//mitochondrial carnitine/acylcarnitine carrier protein [Homo sapiens]
58473	2027	8	42	2.24823	1.1012e-06	Up	2.35027e-06	PLEKHB1	GO:0031224//intrinsic component of membrane;GO:0044424//intracellular part	GO:0060089//molecular transducer activity;GO:0042802//identical protein binding	GO:0007165//signal transduction;GO:0032501//multicellular organismal process	NA	gi|62089012|dbj|BAD92953.1|//pleckstrin homology domain containing, family B (evectins) member 1 variant [Homo sapiens];gi|667290863|ref|XP_008577674.1|//PREDICTED: pleckstrin homology domain-containing family B member 1 isoform X3 [Galeopterus variegatus];gi|667290857|ref|XP_008577672.1|//PREDICTED: pleckstrin homology domain-containing family B member 1 isoform X1 [Galeopterus variegatus];gi|53…
57121	2695	4	21	2.24823	0.000335426	Up	0.000843706	LPAR5	GO:0031224//intrinsic component of membrane	GO:0001608//G-protein coupled nucleotide receptor activity	NA	K08390//lysophosphatidic acid receptor 5	gi|194380446|dbj|BAG63990.1|//unnamed protein product [Homo sapiens]
79085	3475	17	89	2.24418	3.94575e-12	Up	6.67939e-12	SLC25A23	GO:0031224//intrinsic component of membrane;GO:0043231//intracellular membrane-bounded organelle;GO:0019866//organelle inner membrane	GO:0046872//metal ion binding	GO:0006810//transport	K14684//solute carrier family 25 (mitochondrial phosphate transporter), member 23/24/25/41	gi|48476342|ref|NP_077008.2|//calcium-binding mitochondrial carrier protein SCaMC-3 [Homo sapiens]
5335	5202	62	323	2.23711	5.90217e-39	Up	6.21467e-39	PLCG1	GO:0031252//cell leading edge;GO:0016020//membrane;GO:0044444//cytoplasmic part	GO:0046872//metal ion binding;GO:0004871//signal transducer activity;GO:0004629//phospholipase C activity	GO:0010631//epithelial cell migration;GO:0070849//response to epidermal growth factor;GO:0010595//positive regulation of endothelial cell migration;GO:0010863//positive regulation of phospholipase C activity;GO:0007169//transmembrane receptor protein tyrosine kinase signaling pathway;GO:0045765//regulation of angiogenesis;GO:0006644//phospholipid metabolic process;GO:0006935//chemotaxis;GO:000759…	K01116//phosphatidylinositol phospholipase C, gamma-1 [EC:3.1.4.11]	gi|33598948|ref|NP_002651.2|//1-phosphatidylinositol 4,5-bisphosphate phosphodiesterase gamma-1 isoform a [Homo sapiens];gi|33598946|ref|NP_877963.1|//1-phosphatidylinositol 4,5-bisphosphate phosphodiesterase gamma-1 isoform b [Homo sapiens]
8926	1575	12.92	67	2.23047	1.58941e-09	Up	2.96525e-09	SNURF	GO:0043231//intracellular membrane-bounded organelle;GO:0030532//small nuclear ribonucleoprotein complex	GO:0005515//protein binding	GO:0006396//RNA processing;GO:0009719//response to endogenous stimulus	K11660//metastasis-associated protein MTA;K11100//small nuclear ribonucleoprotein N	gi|831246896|ref|XP_012668436.1|//PREDICTED: SNRPN upstream reading frame protein [Otolemur garnettii];gi|675690021|ref|XP_009004277.1|//PREDICTED: small nuclear ribonucleoprotein-associated protein N isoform X2 [Callithrix jacchus]
11237	7401	14843.2	76506.1	2.22168	0	Up	0	RNF24	GO:0043231//intracellular membrane-bounded organelle;GO:0031224//intrinsic component of membrane;GO:0012505//endomembrane system	GO:0046914//transition metal ion binding	NA	K15699//RING finger protein 122	gi|982274139|ref|XP_015313311.1|//PREDICTED: RING finger protein 24 isoform X1 [Macaca fascicularis];gi|759098116|ref|XP_011368198.1|//PREDICTED: RING finger protein 24 [Pteropus vampyrus];gi|197245452|ref|NP_001127810.1|//RING finger protein 24 isoform 2 [Homo sapiens]
1824	5234	1642.82	8465.92	2.22141	0	Up	0	DSC2	GO:0031224//intrinsic component of membrane;GO:0005911//cell-cell junction	GO:0046872//metal ion binding	GO:0016337//null	K07601//desmocollin 2	gi|30509|emb|CAA40142.1|//desmocollin type 2b [Homo sapiens];gi|30508|emb|CAA40141.1|//desmocollin type 2a [Homo sapiens]
3702	4366	91	468	2.21848	5.12577e-55	Up	4.54589e-55	ITK	GO:0016020//membrane;GO:0044444//cytoplasmic part	GO:0004713//protein tyrosine kinase activity;GO:0043169//cation binding;GO:0032559//adenyl ribonucleotide binding	GO:0006464//cellular protein modification process;GO:0006952//defense response;GO:0050851//antigen receptor-mediated signaling pathway	K07363//IL2-inducible T-cell kinase [EC:2.7.10.2]	gi|15718680|ref|NP_005537.3|//tyrosine-protein kinase ITK/TSK [Homo sapiens]
959	1834	10.03	51.51	2.21645	1.08033e-07	Up	2.18974e-07	CD40LG	GO:0044421//extracellular region part;GO:0016021//integral component of membrane	GO:0032813//tumor necrosis factor receptor superfamily binding	GO:0002204//somatic recombination of immunoglobulin genes involved in immune response;GO:0030098//lymphocyte differentiation;GO:0030888//regulation of B cell proliferation;GO:0016337//null;GO:0043066//negative regulation of apoptotic process;GO:0001819//positive regulation of cytokine production;GO:0002637//regulation of immunoglobulin production;GO:0010557//positive regulation of macromolecule b…	K03161//tumor necrosis factor ligand superfamily member 5	gi|4557433|ref|NP_000065.1|//CD40 ligand [Homo sapiens]
84287	1739	16	82	2.21347	3.67012e-11	Up	6.43043e-11	ZDHHC16	GO:0031224//intrinsic component of membrane;GO:0043231//intracellular membrane-bounded organelle;GO:0016020//membrane;GO:0031090//organelle membrane	GO:0046914//transition metal ion binding;GO:0016747//transferase activity, transferring acyl groups other than amino-acyl groups	GO:0012501//programmed cell death	K18932//palmitoyltransferase [EC:2.3.1.225]	gi|37594447|ref|NP_932162.1|//probable palmitoyltransferase ZDHHC16 isoform 4 precursor [Homo sapiens];gi|568214998|ref|NP_001274732.1|//probable palmitoyltransferase ZDHHC16 isoform 5 precursor [Homo sapiens] ;gi|744547650|ref|XP_010972687.1|//PREDICTED: probable palmitoyltransferase ZDHHC16 isoform X1 [Camelus dromedarius];gi|568215593|ref|NP_001274733.1|//probable palmitoyltransferase ZDHHC16 …
55610	5713	9	46	2.20955	4.86591e-07	Up	1.01842e-06	VPS50	NA	NA	NA	NA	gi|62865871|ref|NP_060137.2|//syndetin isoform a [Homo sapiens];gi|58257714|dbj|BAB47490.2|//KIAA1861 protein [Homo sapiens]
84750	3549	22	112	2.20384	1.65942e-14	Up	2.63654e-14	FUT10	GO:0031224//intrinsic component of membrane;GO:0000139//Golgi membrane	GO:0008417//fucosyltransferase activity	GO:0006886//intracellular protein transport;GO:0019953//sexual reproduction;GO:0009611//response to wounding;GO:0006464//cellular protein modification process;GO:0019317//fucose catabolic process;GO:0048534//hematopoietic or lymphoid organ development	K09669//alpha-1,3-fucosyltransferase 10 [EC:2.4.1.-]	gi|194381898|dbj|BAG64318.1|//unnamed protein product [Homo sapiens]
51161	2402	4	20.26	2.19648	0.000482373	Up	0.00122891	C3orf18	GO:0031224//intrinsic component of membrane	NA	NA	NA	gi|767923447|ref|XP_011532088.1|//PREDICTED: uncharacterized protein C3orf18 isoform X4 [Homo sapiens]
327	2775	372	899	1.12893	1.83891e-40	Up	1.90527e-40	APEH	GO:0005635//nuclear envelope	GO:0004175//endopeptidase activity	GO:0019538//protein metabolic process	K01303//acylaminoacyl-peptidase [EC:3.4.19.1]	gi|635118788|ref|XP_007982436.1|//PREDICTED: acylamino-acid-releasing enzyme [Chlorocebus sabaeus]
196403	2230	17	86	2.19472	1.6305e-11	Up	2.81878e-11	DTX3	GO:0044424//intracellular part	GO:0046914//transition metal ion binding	GO:0007166//cell surface receptor signaling pathway	K06058//deltex [EC:2.3.2.27]	gi|593714967|ref|XP_007103963.1|//PREDICTED: probable E3 ubiquitin-protein ligase DTX3 isoform X1 [Physeter catodon]
7706	5744	12055	60971	2.19441	0	Up	0	TRIM25	GO:0031981//nuclear lumen;GO:0044459//plasma membrane part;GO:0044444//cytoplasmic part	GO:0019787//ubiquitin-like protein transferase activity;GO:0046914//transition metal ion binding;GO:0001071//null	GO:0010467//gene expression;GO:0006952//defense response;GO:0001818//negative regulation of cytokine production;GO:0032446//protein modification by small protein conjugation;GO:0051707//response to other organism	K10652//tripartite motif-containing protein 25 [EC:2.3.2.27]	gi|62087568|dbj|BAD92231.1|//tripartite motif-containing 25 variant [Homo sapiens]
4661	5550	3.52	17.77	2.19171	0.000953765	Up	0.00250376	MYT1	GO:0043231//intracellular membrane-bounded organelle	GO:0046914//transition metal ion binding;GO:0001071//null;GO:0003676//nucleic acid binding	GO:0006351//transcription, DNA-templated;GO:0048731//system development;GO:0048869//cellular developmental process	K11307//histone acetyltransferase MYST2 [EC:2.3.1.48]	gi|17975763|ref|NP_004526.1|//myelin transcription factor 1 [Homo sapiens]
383	1475	307	899	1.406	3.2839e-56	Up	2.87917e-56	ARG1	GO:0044444//cytoplasmic part	GO:0043169//cation binding;GO:0016813//hydrolase activity, acting on carbon-nitrogen (but not peptide) bonds, in linear amidines	GO:0006525//arginine metabolic process;GO:0019627//urea metabolic process	K01476//arginase [EC:3.5.3.1]	gi|10947139|ref|NP_000036.2|//arginase-1 isoform 2 [Homo sapiens];gi|346986435|ref|NP_001231367.1|//arginase-1 isoform 1 [Homo sapiens]
146330	3543	14	70	2.17784	1.23153e-09	Up	2.28615e-09	FBXL16	NA	NA	NA	K10282//F-box and leucine-rich repeat protein 16	gi|635029688|ref|XP_007978792.1|//PREDICTED: F-box/LRR-repeat protein 16 isoform X1 [Chlorocebus sabaeus]
51617	2473	9	45	2.17784	7.81702e-07	Up	1.65541e-06	HMP19	GO:0031224//intrinsic component of membrane;GO:0012506//vesicle membrane;GO:0005771//multivesicular body;GO:0000139//Golgi membrane	GO:0001664//G-protein coupled receptor binding	GO:0007186//G-protein coupled receptor signaling pathway	K15493//neuron-specific vesicular protein calcyon	gi|675725633|ref|XP_003814059.2|//PREDICTED: uncharacterized protein C5orf47 homolog isoform X1 [Pan paniscus]
285195	3647	6	30	2.17784	3.88594e-05	Up	9.14434e-05	SLC9A9	GO:0031224//intrinsic component of membrane;GO:0005770//late endosome	GO:0005451//monovalent cation:proton antiporter activity	GO:0055067//monovalent inorganic cation homeostasis;GO:0030001//metal ion transport	K14725//solute carrier family 9 (sodium/hydrogen exchanger), member 9	gi|27734935|ref|NP_775924.1|//sodium/hydrogen exchanger 9 [Homo sapiens]
220136	1864	6	30	2.17784	3.88594e-05	Up	9.14434e-05	CFAP53	NA	NA	NA	K11589//methyl-CpG-binding domain protein 1;K18626//trichohyalin;K16811//trichoplein keratin filament-binding protein	gi|675786710|ref|XP_003827259.2|//PREDICTED: cilia- and flagella-associated protein 53 [Pan paniscus]
80755	1377	6	30	2.17784	3.88594e-05	Up	9.14434e-05	AARSD1	GO:0044424//intracellular part	GO:0043169//cation binding;GO:0032559//adenyl ribonucleotide binding;GO:0004812//aminoacyl-tRNA ligase activity	GO:0006418//tRNA aminoacylation for protein translation	K07050//misacylated tRNA(Ala) deacylase [EC:3.1.1.-]	gi|387528025|ref|NP_001248363.1|//alanyl-tRNA editing protein Aarsd1 [Homo sapiens]
1154	2224	108	538	2.17249	2.16219e-61	Up	1.82522e-61	CISH	NA	NA	GO:0007165//signal transduction;GO:0016049//cell growth	K04701//cytokine inducible SH2-containing protein	gi|195976771|ref|NP_037456.5|//cytokine-inducible SH2-containing protein isoform 1 [Homo sapiens];gi|21614507|ref|NP_659508.1|//cytokine-inducible SH2-containing protein isoform 2 [Homo sapiens]
64172	2339	5.04	25.05	2.16923	0.000148007	Up	0.000362304	OSGEPL1	GO:0043231//intracellular membrane-bounded organelle	GO:0004175//endopeptidase activity;GO:0043169//cation binding	GO:0019538//protein metabolic process	K01409//N6-L-threonylcarbamoyladenine synthase [EC:2.3.1.234]	gi|119631296|gb|EAX10891.1|//O-sialoglycoprotein endopeptidase-like 1, isoform CRA_b [Homo sapiens]
8794	1512	16362	81242.5	2.1678	0	Up	0	TNFRSF10C	GO:0016021//integral component of membrane	GO:0004872//receptor activity	GO:0023052//signaling;GO:0009987//cellular process	K04722//tumor necrosis factor receptor superfamily member 10	gi|2443820|gb|AAB71413.1|//cytotoxic TRAIL receptor-3 [Homo sapiens]
285513	6352	59	291	2.15815	7.78617e-34	Up	8.72135e-34	GPRIN3	NA	NA	NA	NA	gi|112821690|ref|NP_938022.2|//G protein-regulated inducer of neurite outgrowth 3 [Homo sapiens]
7292	3442	13	64	2.15547	7.11411e-09	Up	1.36701e-08	TNFSF4	GO:0044421//extracellular region part;GO:0016021//integral component of membrane	GO:0032813//tumor necrosis factor receptor superfamily binding	GO:0050714//positive regulation of protein secretion;GO:0050707//regulation of cytokine secretion;GO:0043392//negative regulation of DNA binding;GO:0031349//positive regulation of defense response;GO:0023052//signaling;GO:0042102//positive regulation of T cell proliferation;GO:0034695//response to prostaglandin E;GO:0001818//negative regulation of cytokine production;GO:0016125//sterol metabolic …	K05469//tumor necrosis factor ligand superfamily member 4	gi|686701073|ref|XP_009239104.1|//PREDICTED: tumor necrosis factor ligand superfamily member 4 isoform X1 [Pongo abelii];gi|635132516|ref|XP_007987657.1|//PREDICTED: tumor necrosis factor ligand superfamily member 4 isoform X1 [Chlorocebus sabaeus]
91298	2895	4	19.69	2.15531	0.000635249	Up	0.00163856	C12orf29	NA	NA	NA	K16533//centrosomal protein CEP290	gi|61742164|ref|NP_001009894.2|//uncharacterized protein C12orf29 [Homo sapiens]
9586	7917	12929.2	63546.2	2.15309	0	Up	0	CREB5	GO:0043231//intracellular membrane-bounded organelle	GO:0046872//metal ion binding;GO:0003677//DNA binding;GO:0005515//protein binding;GO:0046914//transition metal ion binding;GO:0001071//null	GO:0006355//regulation of transcription, DNA-templated	K09047//cyclic AMP-responsive element-binding protein 5	gi|545214298|ref|XP_005609331.1|//PREDICTED: cyclic AMP-responsive element-binding protein 5 isoform X4 [Equus caballus];gi|725585399|ref|XP_010344008.1|//PREDICTED: cyclic AMP-responsive element-binding protein 5 isoform X5 [Saimiri boliviensis boliviensis];gi|767946032|ref|XP_011513918.1|//PREDICTED: cyclic AMP-responsive element-binding protein 5 isoform X4 [Homo sapiens];gi|59938770|ref|NP_87…
7263	1117	153	751	2.1512	6.62903e-84	Up	4.81168e-84	TST	GO:0044429//mitochondrial part;GO:0019866//organelle inner membrane	GO:0016783//sulfurtransferase activity	GO:0009439//cyanate metabolic process;GO:0015698//inorganic anion transport	K01011//thiosulfate/3-mercaptopyruvate sulfurtransferase [EC:2.8.1.1 2.8.1.2]	gi|17402865|ref|NP_003303.2|//thiosulfate sulfurtransferase [Homo sapiens]
7294	2914	40	196	2.1487	2.70292e-23	Up	3.54786e-23	TXK	GO:0044424//intracellular part	GO:0004713//protein tyrosine kinase activity;GO:0032559//adenyl ribonucleotide binding	GO:0006464//cellular protein modification process	K08016//tyrosine-protein kinase TXK [EC:2.7.10.2]	gi|148596974|ref|NP_003319.2|//tyrosine-protein kinase TXK [Homo sapiens]
150726	6939	20	98	2.1487	1.41053e-12	Up	2.35525e-12	FBXO41	GO:0044464//cell part	GO:0046914//transition metal ion binding	NA	K10316//F-box protein 41	gi|289803020|ref|NP_001073879.2|//F-box only protein 41 [Homo sapiens]
79971	2471	2142	10488	2.14762	0	Up	0	WLS	GO:0031224//intrinsic component of membrane;GO:0043231//intracellular membrane-bounded organelle;GO:0012506//vesicle membrane	GO:0060089//molecular transducer activity	GO:0030177//positive regulation of Wnt signaling pathway;GO:0007249//I-kappaB kinase/NF-kappaB signaling;GO:0032501//multicellular organismal process	NA	gi|31542745|ref|NP_079187.3|//protein wntless homolog isoform 1 precursor [Homo sapiens];gi|301069320|ref|NP_001002292.3|//protein wntless homolog isoform 2 [Homo sapiens];gi|300934787|ref|NP_001180263.1|//protein wntless homolog isoform 3 [Homo sapiens]
4068	2514	18	88	2.14542	1.83659e-11	Up	3.18126e-11	SH2D1A	GO:0044424//intracellular part	GO:0030674//protein binding, bridging	GO:0006952//defense response;GO:0007154//cell communication;GO:0006955//immune response;GO:0001912//positive regulation of leukocyte mediated cytotoxicity	K07990//SH2 domain protein 1A	gi|169234945|ref|NP_001108409.1|//SH2 domain-containing protein 1A isoform 2 [Homo sapiens];gi|4506923|ref|NP_002342.1|//SH2 domain-containing protein 1A isoform 1 [Homo sapiens]
9172	5018	17	83	2.14349	6.62083e-11	Up	1.17176e-10	MYOM2	GO:0016459//myosin complex	GO:0005198//structural molecule activity	NA	K12567//titin [EC:2.7.11.1]	gi|611434985|ref|NP_003961.3|//myomesin-2 [Homo sapiens]
5013	2872	126	615	2.14308	9.51541e-69	Up	7.60733e-69	OTX1	GO:0043231//intracellular membrane-bounded organelle	GO:0005488//binding;GO:0001071//null	GO:0006355//regulation of transcription, DNA-templated;GO:0007420//brain development	K18490//homeobox protein OTX2;K09326//homeobox protein OTX1	gi|821012256|ref|XP_012356559.1|//PREDICTED: LOW QUALITY PROTEIN: homeobox protein OTX1 [Nomascus leucogenys];gi|741943159|ref|XP_010808376.1|//PREDICTED: homeobox protein OTX1 isoform X2 [Bos taurus]
6678	3601	16	78	2.14132	2.39529e-10	Up	4.32333e-10	SPARC	GO:0031091//platelet alpha granule;GO:0005578//proteinaceous extracellular matrix	GO:0046872//metal ion binding;GO:0005515//protein binding	GO:0001775//cell activation;GO:0008283//cell proliferation;GO:0070848//response to growth factor;GO:0023052//signaling;GO:0007599//hemostasis;GO:0006887//exocytosis	K08136//sparc/osteonectin, cwcv and kazal-like domains proteoglycan (testican);K12819//pre-mRNA-processing factor SLU7	gi|827342587|ref|NP_001296373.1|//SPARC isoform 3 precursor [Homo sapiens]
64231	1571	508	2473	2.13928	7.18411e-270	Up	2.7476e-270	MS4A6A	GO:0031224//intrinsic component of membrane	GO:0004871//signal transducer activity	NA	K08090//membrane-spanning 4-domains, subfamily A, member 2	gi|351721142|ref|NP_001234928.1|//membrane-spanning 4-domains subfamily A member 6A isoform 4 [Homo sapiens] ;gi|530397150|ref|XP_005274234.1|//PREDICTED: membrane-spanning 4-domains subfamily A member 6A isoform X3 [Homo sapiens]
6404	2573	9956	48454	2.13889	0	Up	0	SELPLG	GO:0016021//integral component of membrane	GO:0005515//protein binding	GO:0007159//leukocyte cell-cell adhesion;GO:0002376//immune system process;GO:0070741//response to interleukin-6;GO:0007599//hemostasis	K06544//selectin P ligand	gi|34534636|dbj|BAC87066.1|//unnamed protein product [Homo sapiens]
653604	457	6.4	31.1	2.13668	3.53494e-05	Up	8.2846e-05	HIST2H3D	GO:0043231//intracellular membrane-bounded organelle;GO:0000785//chromatin	GO:0003676//nucleic acid binding	GO:0034728//nucleosome organization	K11253//histone H3	gi|831277892|ref|XP_012669845.1|//PREDICTED: uncharacterized protein LOC105888650 [Clupea harengus]
2775	4662	7	34	2.13602	1.69222e-05	Up	3.87796e-05	GNAO1	GO:0032991//macromolecular complex;GO:0031234//extrinsic component of cytoplasmic side of plasma membrane	GO:0031628//opioid receptor binding;GO:0060089//molecular transducer activity;GO:0032561//guanyl ribonucleotide binding;GO:0017111//nucleoside-triphosphatase activity;GO:0032403//protein complex binding	GO:0007610//behavior;GO:0003012//muscle system process;GO:0043271//negative regulation of ion transport;GO:0030030//cell projection organization;GO:0007420//brain development;GO:0000302//response to reactive oxygen species;GO:0014072//response to isoquinoline alkaloid;GO:0043087//regulation of GTPase activity;GO:0044057//regulation of system process;GO:0009719//response to endogenous stimulus;GO:…	K04534//guanine nucleotide-binding protein G(o) subunit alpha	gi|655782175|ref|XP_008255533.1|//PREDICTED: LOW QUALITY PROTEIN: guanine nucleotide-binding protein G(o) subunit alpha [Oryctolagus cuniculus]
219285	6793	2322.75	11235	2.13001	0	Up	0	SAMD9L	NA	NA	NA	NA	gi|51339291|ref|NP_689916.2|//sterile alpha motif domain-containing protein 9-like [Homo sapiens]
7089	2299	5.79	28	2.12971	8.06391e-05	Up	0.000193769	TLE2	GO:0043231//intracellular membrane-bounded organelle	GO:0003712//transcription cofactor activity;GO:0005488//binding	GO:0009653//anatomical structure morphogenesis;GO:0030178//negative regulation of Wnt signaling pathway	K04497//groucho	gi|664806005|ref|NP_001287775.1|//transducin-like enhancer protein 2 isoform 4 [Homo sapiens];gi|221219048|ref|NP_001138233.1|//transducin-like enhancer protein 2 isoform 2 [Homo sapiens];gi|21361151|ref|NP_003251.2|//transducin-like enhancer protein 2 isoform 1 [Homo sapiens];gi|926695818|ref|XP_013820762.1|//PREDICTED: LOW QUALITY PROTEIN: transducin-like enhancer protein 2 [Capra hircus]
152789	1900	6	29	2.12893	6.25372e-05	Up	0.000149376	JAKMIP1	GO:0032991//macromolecular complex;GO:0015630//microtubule cytoskeleton	GO:0008092//cytoskeletal protein binding;GO:0005102//receptor binding;GO:0003676//nucleic acid binding	GO:0006810//transport	K10362//myosin XVIII;K20478//golgin subfamily B member 1	gi|150456473|ref|NP_001092903.1|//janus kinase and microtubule-interacting protein 1 isoform 1 [Homo sapiens];gi|807066286|ref|NP_001293063.1|//janus kinase and microtubule-interacting protein 1 isoform 3 [Homo sapiens] ;gi|21389505|ref|NP_653321.1|//janus kinase and microtubule-interacting protein 1 isoform 2 [Homo sapiens]
90843	1158	6	29	2.12893	6.25372e-05	Up	0.000149376	TCEAL8	GO:0043231//intracellular membrane-bounded organelle	NA	NA	NA	gi|927219429|ref|XP_013846435.1|//PREDICTED: transcription elongation factor A protein-like 8 isoform X1 [Sus scrofa];gi|585169240|ref|XP_006736670.1|//PREDICTED: transcription elongation factor A protein-like 8 isoform X1 [Leptonychotes weddellii]
55365	1047	6	29	2.12893	6.25372e-05	Up	0.000149376	TMEM176A	GO:0031224//intrinsic component of membrane	NA	NA	NA	gi|767948207|ref|XP_011514678.1|//PREDICTED: transmembrane protein 176A isoform X1 [Homo sapiens]
55624	2753	10	48	2.11895	5.4745e-07	Up	1.14918e-06	POMGNT1	GO:0012505//endomembrane system;GO:0031224//intrinsic component of membrane;GO:0043231//intracellular membrane-bounded organelle	GO:0008375//acetylglucosaminyltransferase activity	GO:0006486//protein glycosylation	K09666//beta-1,2-N-acetylglucosaminyltransferase [EC:2.4.1.-]	gi|588480509|ref|NP_001277058.1|//protein O-linked-mannose beta-1,2-N-acetylglucosaminyltransferase 1 isoform 3 [Homo sapiens] ;gi|344313163|ref|NP_001230695.1|//protein O-linked-mannose beta-1,2-N-acetylglucosaminyltransferase 1 isoform 2 [Homo sapiens];gi|210147552|ref|NP_060209.3|//protein O-linked-mannose beta-1,2-N-acetylglucosaminyltransferase 1 isoform 1 [Homo sapiens]
115024	1430	5	24	2.11895	0.000234382	Up	0.000582764	NT5C3B	GO:0044424//intracellular part	GO:0046872//metal ion binding;GO:0008252//nucleotidase activity	GO:0006753//nucleoside phosphate metabolic process	K01081//5'-nucleotidase [EC:3.1.3.5]	gi|294459996|ref|NP_443167.4|//7-methylguanosine phosphate-specific 5'-nucleotidase [Homo sapiens]
196513	2131	5	24	2.11895	0.000234382	Up	0.000582764	DCP1B	GO:0043231//intracellular membrane-bounded organelle;GO:0044444//cytoplasmic part	GO:0003824//catalytic activity;GO:0005488//binding	GO:0000291//nuclear-transcribed mRNA catabolic process, exonucleolytic;GO:0000956//nuclear-transcribed mRNA catabolic process	K12611//mRNA-decapping enzyme 1B [EC:3.-.-.-]	gi|985482508|ref|NP_001306221.1|//mRNA-decapping enzyme 1B isoform 2 [Homo sapiens] ;gi|40548403|ref|NP_689853.3|//mRNA-decapping enzyme 1B isoform 1 [Homo sapiens]
28986	1485	5	24	2.11895	0.000234382	Up	0.000582764	MAGEH1	GO:0044424//intracellular part	NA	GO:0012501//programmed cell death	K12464//melanoma-associated antigen D1;K19482//necdin	gi|625211440|ref|XP_007646521.1|//PREDICTED: melanoma-associated antigen H1 isoform X1 [Cricetulus griseus]
113746	1154	5	24	2.11895	0.000234382	Up	0.000582764	ODF3	GO:0044447//axoneme part	NA	GO:0048232//male gamete generation;GO:0048869//cellular developmental process	NA	gi|554790333|ref|NP_001273065.1|//outer dense fiber protein 3 isoform 2 [Homo sapiens];gi|19526475|ref|NP_444510.2|//outer dense fiber protein 3 isoform 1 [Homo sapiens]
28951	4408	82	392	2.11307	8.89051e-44	Up	8.82909e-44	TRIB2	GO:0031981//nuclear lumen;GO:0043232//intracellular non-membrane-bounded organelle	GO:0019887//protein kinase regulator activity;GO:0032559//adenyl ribonucleotide binding;GO:0016301//kinase activity;GO:0055103//ligase regulator activity;GO:0019899//enzyme binding	GO:0042036//negative regulation of cytokine biosynthetic process;GO:0006464//cellular protein modification process;GO:0045596//negative regulation of cell differentiation;GO:0009966//regulation of signal transduction;GO:0033673//negative regulation of kinase activity;GO:0031331//positive regulation of cellular catabolic process	K08814//tribbles homolog 1/2	gi|11056054|ref|NP_067675.1|//tribbles homolog 2 [Homo sapiens];gi|675786096|ref|XP_008950574.1|//PREDICTED: tribbles homolog 2 isoform X2 [Pan paniscus]
23348	7476	59	282	2.11282	4.94001e-32	Up	5.67495e-32	DOCK9	GO:0044444//cytoplasmic part	GO:0032561//guanyl ribonucleotide binding;GO:0019899//enzyme binding;GO:0030695//GTPase regulator activity	GO:0007599//hemostasis	K13708//dedicator of cytokinesis protein 1;K05727//dedicator of cytokinesis protein 3;K20493//leucine-rich repeat-containing protein 16;K17707//dedicator of cytokinesis protein 5	gi|194239705|ref|NP_001123520.1|//dedicator of cytokinesis protein 9 isoform b [Homo sapiens];gi|119629401|gb|EAX08996.1|//dedicator of cytokinesis 9, isoform CRA_c [Homo sapiens];gi|119629408|gb|EAX09003.1|//dedicator of cytokinesis 9, isoform CRA_j [Homo sapiens];gi|194239707|ref|NP_001123521.1|//dedicator of cytokinesis protein 9 isoform c [Homo sapiens];gi|194239709|ref|NP_001123522.1|//dedic…
729574	510	13.74	65.67	2.11277	7.05222e-09	Up	1.35492e-08	FAM231A	NA	NA	NA	NA	gi|536291109|ref|NP_001269250.1|//protein FAM231A [Homo sapiens]
162993	2133	9	43	2.11225	2.00645e-06	Up	4.3342e-06	ZNF846	GO:0043231//intracellular membrane-bounded organelle	GO:0046914//transition metal ion binding;GO:0003676//nucleic acid binding	GO:0006351//transcription, DNA-templated	K09228//KRAB domain-containing zinc finger protein	gi|117938301|ref|NP_001071092.1|//zinc finger protein 846 [Homo sapiens]
64110	1700	13	62	2.10967	1.80476e-08	Up	3.52982e-08	MAGEF1	NA	NA	NA	K12464//melanoma-associated antigen D1	gi|29826296|ref|NP_071432.2|//melanoma-associated antigen F1 [Homo sapiens]
2529	2428	659.38	3139.54	2.10729	0	Up	0	FUT7	GO:0031224//intrinsic component of membrane;GO:0000139//Golgi membrane	GO:0008417//fucosyltransferase activity	GO:0006464//cellular protein modification process;GO:0019317//fucose catabolic process	K07635//galactoside alpha-1,3-fucosyltransferase 7 [EC:2.4.1.-]	gi|4758406|ref|NP_004470.1|//alpha-(1,3)-fucosyltransferase 7 [Homo sapiens]
5196	878	9.59	45.66	2.10724	1.06569e-06	Up	2.27268e-06	PF4	GO:0044421//extracellular region part;GO:0031091//platelet alpha granule	GO:0005125//cytokine activity;GO:0005539//glycosaminoglycan binding	GO:0001525//angiogenesis;GO:0050900//leukocyte migration;GO:0042221//response to chemical;GO:0042268//regulation of cytolysis;GO:0045638//negative regulation of myeloid cell differentiation;GO:0007166//cell surface receptor signaling pathway;GO:0001819//positive regulation of cytokine production;GO:0006915//apoptotic process;GO:0001775//cell activation;GO:0002763//positive regulation of myeloid l…	K05407//platelet factor 4	gi|4505733|ref|NP_002610.1|//platelet factor 4 precursor [Homo sapiens]
23052	4693	8	38	2.10384	7.3618e-06	Up	1.64465e-05	ENDOD1	NA	GO:0043169//cation binding;GO:0004518//nuclease activity	NA	K15049//endonuclease domain-containing 1 protein	gi|148225659|ref|NP_055851.1|//endonuclease domain-containing 1 protein precursor [Homo sapiens]
10750	2089	4	19	2.10384	0.000885124	Up	0.00231542	GRAP	GO:0044424//intracellular part	GO:0030674//protein binding, bridging	GO:0007264//small GTPase mediated signal transduction;GO:0007154//cell communication	K04364//growth factor receptor-binding protein 2	gi|530409733|ref|XP_005256482.1|//PREDICTED: GRB2-related adapter protein isoform X1 [Homo sapiens];gi|675657908|ref|XP_002747899.2|//PREDICTED: GRB2-related adapter protein [Callithrix jacchus]
84641	3312	1234	5860	2.10347	0	Up	0	MFSD14B	GO:0031224//intrinsic component of membrane	GO:0008493//tetracycline transmembrane transporter activity;GO:0005488//binding	GO:0015850//organic hydroxy compound transport;GO:0042221//response to chemical	K14613//MFS transporter, PCFT/HCP family, solute carrier family 46 (folate transporter), member 1	gi|426362374|ref|XP_004048342.1|//PREDICTED: LOW QUALITY PROTEIN: hippocampus abundant transcript-like protein 1 [Gorilla gorilla gorilla]
51734	1414	5868	27778	2.09892	0	Up	0	MSRB1	GO:0043231//intracellular membrane-bounded organelle	GO:0016671//oxidoreductase activity, acting on a sulfur group of donors, disulfide as acceptor;GO:0046914//transition metal ion binding	GO:0044267//cellular protein metabolic process	K07305//peptide-methionine (R)-S-oxide reductase [EC:1.8.4.12]	gi|7706511|ref|NP_057416.1|//methionine-R-sulfoxide reductase B1 [Homo sapiens]
284194	1243	25.58	121	2.09783	1.05574e-14	Up	1.66672e-14	LGALS9B	GO:0044424//intracellular part	GO:0060089//molecular transducer activity;GO:0048029//monosaccharide binding	GO:0007249//I-kappaB kinase/NF-kappaB signaling	K10093//galectin-9	gi|111494237|ref|NP_001036150.1|//galectin-9B [Homo sapiens]
93594	3520	7	33	2.09295	2.70392e-05	Up	6.28911e-05	TBC1D31	GO:0044464//cell part	NA	NA	K20045//intersectin;K16794//platelet-activating factor acetylhydrolase IB subunit alpha	gi|675758925|ref|XP_008972188.1|//PREDICTED: TBC1 domain family member 31 isoform X5 [Pan paniscus];gi|223005859|ref|NP_663622.2|//TBC1 domain family member 31 isoform 1 [Homo sapiens];gi|223005857|ref|NP_001138560.1|//TBC1 domain family member 31 isoform 2 [Homo sapiens]
92558	3081	24	113	2.09113	8.35649e-14	Up	1.3526e-13	BICDL1	GO:0005815//microtubule organizing center	GO:0008092//cytoskeletal protein binding	GO:0046907//intracellular transport;GO:0030030//cell projection organization;GO:0048731//system development	K16756//coiled-coil domain-containing protein 64	gi|119120918|ref|NP_997194.2|//bicaudal D-related protein 1 [Homo sapiens]
54969	1233	17	80	2.09038	2.64965e-10	Up	4.79286e-10	HPF1	GO:0043231//intracellular membrane-bounded organelle	NA	NA	NA	gi|157388914|ref|NP_060337.2|//UPF0609 protein C4orf27 [Homo sapiens]
54665	6632	1156	5436	2.08932	0	Up	0	RSBN1	GO:0043231//intracellular membrane-bounded organelle	NA	NA	K18024//tyrosine-protein phosphatase non-receptor type 12/18/22 [EC:3.1.3.48]	gi|332809963|ref|XP_003308358.1|//PREDICTED: LOW QUALITY PROTEIN: round spermatid basic protein 1 [Pan troglodytes];gi|50949894|emb|CAH10493.1|//hypothetical protein [Homo sapiens]
634	3515	2345.52	5786.32	1.15865	2.8063e-260	Up	1.09694e-260	CEACAM1	GO:0016021//integral component of membrane	NA	GO:0016337//null;GO:0048870//cell motility;GO:0007166//cell surface receptor signaling pathway;GO:0048646//anatomical structure formation involved in morphogenesis	K06499//carcinoembryonic antigen-related cell adhesion molecule	gi|296317312|ref|NP_001171744.1|//carcinoembryonic antigen-related cell adhesion molecule 1 isoform 3 precursor [Homo sapiens];gi|296317305|ref|NP_001171742.1|//carcinoembryonic antigen-related cell adhesion molecule 1 isoform 4 precursor [Homo sapiens];gi|19923195|ref|NP_001703.2|//carcinoembryonic antigen-related cell adhesion molecule 1 isoform 1 precursor [Homo sapiens];gi|329112547|ref|NP_00…
684	1048	493	1756	1.68855	1.56803e-140	Up	8.71132e-141	BST2	GO:0005768//endosome;GO:0016021//integral component of membrane	GO:0060089//molecular transducer activity;GO:0042802//identical protein binding	GO:0007249//I-kappaB kinase/NF-kappaB signaling;GO:0046649//lymphocyte activation;GO:0006952//defense response;GO:0007154//cell communication;GO:0006955//immune response;GO:0002252//immune effector process;GO:0032501//multicellular organismal process	K06731//bone marrow stromal cell antigen 2	gi|4757876|ref|NP_004326.1|//bone marrow stromal antigen 2 precursor [Homo sapiens]
257177	800	9	42	2.07831	3.18746e-06	Up	6.97936e-06	CFAP126	NA	NA	NA	K13101//G patch domain and KOW motifs-containing protein	gi|119572981|gb|EAW52596.1|//chromosome 1 open reading frame 192, partial [Homo sapiens]
259286	972	26	121	2.07434	1.60965e-14	Up	2.55565e-14	TAS2R40	GO:0031224//intrinsic component of membrane	GO:0004888//transmembrane signaling receptor activity	GO:0007166//cell surface receptor signaling pathway;GO:0007606//sensory perception of chemical stimulus	K08474//taste receptor type 2	gi|28882033|ref|NP_795363.1|//taste receptor type 2 member 40 [Homo sapiens]
820	758	242	661	1.30556	1.43544e-37	Up	1.53564e-37	CAMP	GO:0030141//secretory granule	NA	GO:0044126//regulation of growth of symbiont in host;GO:0044139//modulation of growth of symbiont on or near host;GO:0051852//disruption by host of symbiont cells;GO:0042742//defense response to bacterium	K13916//cathelicidin antimicrobial peptide	gi|348041314|ref|NP_004336.3|//cathelicidin antimicrobial peptide preproprotein [Homo sapiens]
7741	2627	56	260	2.07093	5.52173e-29	Up	6.63958e-29	ZSCAN26	GO:0043231//intracellular membrane-bounded organelle	GO:0046914//transition metal ion binding;GO:0001071//null	GO:0006351//transcription, DNA-templated	K09230//SCAN domain-containing zinc finger protein	gi|767940662|ref|XP_011513167.1|//PREDICTED: zinc finger and SCAN domain-containing protein 26 isoform X3 [Homo sapiens];gi|161353477|ref|NP_689949.3|//zinc finger and SCAN domain-containing protein 26 isoform c [Homo sapiens];gi|161353483|ref|NP_001104509.1|//zinc finger and SCAN domain-containing protein 26 isoform b [Homo sapiens];gi|161353481|ref|NP_001018854.2|//zinc finger and SCAN domain-c…
4671	6327	5144.56	23848.5	2.06869	0	Up	0	NAIP	GO:0044464//cell part	GO:0043169//cation binding;GO:0016462//pyrophosphatase activity	GO:0043066//negative regulation of apoptotic process;GO:0048731//system development	K12807//baculoviral IAP repeat-containing protein 1	gi|119393876|ref|NP_075043.1|//baculoviral IAP repeat-containing protein 1 isoform 2 [Homo sapiens];gi|119393878|ref|NP_004527.2|//baculoviral IAP repeat-containing protein 1 isoform 1 [Homo sapiens]
124222	2373	29.14	135	2.0678	6.27877e-16	Up	9.6301e-16	PAQR4	GO:0031224//intrinsic component of membrane	GO:0004871//signal transducer activity	NA	K06633//membrane-associated tyrosine- and threonine-specific cdc2-inhibitory kinase [EC:2.7.11.1]	gi|530407613|ref|XP_005255169.1|//PREDICTED: progestin and adipoQ receptor family member 4 isoform X1 [Homo sapiens];gi|548962074|ref|NP_001271441.1|//progestin and adipoQ receptor family member 4 isoform 3 [Homo sapiens] ;gi|548961384|ref|NP_001271440.1|//progestin and adipoQ receptor family member 4 isoform 2 [Homo sapiens];gi|31542756|ref|NP_689554.2|//progestin and adipoQ receptor family memb…
26262	2596	53	245	2.06463	2.53604e-27	Up	3.12142e-27	TSPAN17	GO:0031224//intrinsic component of membrane;GO:0043234//protein complex	GO:0019787//ubiquitin-like protein transferase activity;GO:0005488//binding	GO:0032446//protein modification by small protein conjugation	K10303//F-box protein 23	gi|50511934|ref|NP_569732.2|//tetraspanin-17 isoform b [Homo sapiens];gi|54859560|ref|NP_036303.1|//tetraspanin-17 isoform a [Homo sapiens]
57205	6550	71	328	2.06372	6.57406e-36	Up	7.18631e-36	ATP10D	GO:0031224//intrinsic component of membrane	GO:0046872//metal ion binding;GO:0042625//ATPase coupled ion transmembrane transporter activity;GO:0032559//adenyl ribonucleotide binding;GO:0005548//phospholipid transporter activity	GO:0006869//lipid transport;GO:0009206//purine ribonucleoside triphosphate biosynthetic process;GO:0006811//ion transport	K01530//phospholipid-translocating ATPase [EC:3.6.3.1]	gi|222352161|ref|NP_065186.3|//probable phospholipid-transporting ATPase VD [Homo sapiens]
823	3110	3489	8964	1.21724	0	Up	0	CAPN1	GO:0016020//membrane;GO:0044424//intracellular part	GO:0046872//metal ion binding;GO:0004197//cysteine-type endopeptidase activity	GO:0008283//cell proliferation;GO:0019538//protein metabolic process	K01367//calpain-1 [EC:3.4.22.52]	gi|635012337|ref|XP_007987345.1|//PREDICTED: calpain-1 catalytic subunit isoform X3 [Chlorocebus sabaeus];gi|12408656|ref|NP_005177.2|//calpain-1 catalytic subunit [Homo sapiens]
51192	869	1522.9	6995.52	2.05552	0	Up	0	CKLF	GO:0031224//intrinsic component of membrane;GO:0044421//extracellular region part	GO:0005125//cytokine activity	GO:0030595//leukocyte chemotaxis;GO:0046903//secretion	NA	gi|194376100|dbj|BAG62809.1|//unnamed protein product [Homo sapiens];gi|32307154|ref|NP_857591.1|//chemokine-like factor isoform b [Homo sapiens];gi|32307156|ref|NP_857592.1|//chemokine-like factor isoform d [Homo sapiens];gi|8393581|ref|NP_058647.1|//chemokine-like factor isoform a [Homo sapiens];gi|7705933|ref|NP_057410.1|//chemokine-like factor isoform c [Homo sapiens]
2022	2817	12	55	2.05231	1.64545e-07	Up	3.36711e-07	ENG	GO:0031224//intrinsic component of membrane;GO:0044421//extracellular region part;GO:0009986//cell surface;GO:0043235//receptor complex	GO:0005057//signal transducer activity, downstream of receptor;GO:0042802//identical protein binding;GO:0030247//polysaccharide binding;GO:0048029//monosaccharide binding;GO:0019838//growth factor binding;GO:0004675//transmembrane receptor protein serine/threonine kinase activity;GO:0005160//transforming growth factor beta receptor binding;GO:0032403//protein complex binding	GO:0003143//embryonic heart tube morphogenesis;GO:0060537//muscle tissue development;GO:0000122//negative regulation of transcription from RNA polymerase II promoter;GO:0007179//transforming growth factor beta receptor signaling pathway;GO:0032769//negative regulation of monooxygenase activity;GO:0048870//cell motility;GO:0001934//positive regulation of protein phosphorylation;GO:0006935//chemota…	K06526//endoglin	gi|182091|gb|AAA35800.1|//endoglin precursor, partial [Homo sapiens];gi|795498443|ref|XP_011709764.1|//PREDICTED: endoglin [Macaca nemestrina]
152518	3771	1033	4727	2.05	0	Up	0	NFXL1	GO:0031224//intrinsic component of membrane;GO:0043231//intracellular membrane-bounded organelle	GO:0046914//transition metal ion binding;GO:0001071//null	GO:0006351//transcription, DNA-templated	K15683//NF-X1-type zinc finger protein NFXL1	gi|89363020|ref|NP_694540.3|//NF-X1-type zinc finger protein NFXL1 [Homo sapiens]
119774	1067	261.17	1194.17	2.04886	2.01532e-124	Up	1.20514e-124	OR52K2	GO:0031224//intrinsic component of membrane	GO:0004930//G-protein coupled receptor activity	GO:0007606//sensory perception of chemical stimulus	K04257//olfactory receptor	gi|284055273|ref|NP_001005172.2|//olfactory receptor 52K2 [Homo sapiens]
847	2300	3051	10638	1.65779	0	Up	0	CAT	GO:0005740//mitochondrial envelope;GO:0016020//membrane;GO:0044439//peroxisomal part;GO:0000323//lytic vacuole	GO:0005506//iron ion binding;GO:0042802//identical protein binding;GO:0004601//peroxidase activity;GO:0000166//nucleotide binding;GO:0016811//hydrolase activity, acting on carbon-nitrogen (but not peptide) bonds, in linear amides	GO:0009411//response to UV;GO:0042743//hydrogen peroxide metabolic process;GO:0043433//negative regulation of DNA binding transcription factor activity;GO:0006915//apoptotic process;GO:0006639//acylglycerol metabolic process;GO:0006979//response to oxidative stress;GO:0009112//nucleobase metabolic process;GO:0051091//positive regulation of DNA binding transcription factor activity;GO:0009967//pos…	K03781//catalase [EC:1.11.1.6]	gi|4557014|ref|NP_001743.1|//catalase [Homo sapiens]
123606	6386	9	41	2.04354	5.05815e-06	Up	1.12006e-05	NIPA1	GO:0005768//endosome;GO:0031224//intrinsic component of membrane	NA	GO:0009987//cellular process;GO:0070838//divalent metal ion transport	K19364//magnesium transporter NIPA1	gi|41406091|ref|NP_653200.2|//magnesium transporter NIPA1 isoform 1 [Homo sapiens];gi|48257210|gb|AAH25678.2|//NIPA1 protein, partial [Homo sapiens]
3274	2659	2772	12623	2.04297	0	Up	0	HRH2	GO:0016021//integral component of membrane	GO:0008227//G-protein coupled amine receptor activity	GO:0007186//G-protein coupled receptor signaling pathway;GO:0002376//immune system process	K04150//histamine receptor H2	gi|686769630|ref|XP_002832923.2|//PREDICTED: LOW QUALITY PROTEIN: histamine H2 receptor [Pongo abelii];gi|197085610|ref|NP_001124527.1|//histamine H2 receptor isoform 1 [Homo sapiens]
84033	26243	29	132	2.04233	2.12952e-15	Up	3.31045e-15	OBSCN	GO:0031674//I band;GO:0031672//A band	GO:0043169//cation binding;GO:0005088//Ras guanyl-nucleotide exchange factor activity;GO:0032559//adenyl ribonucleotide binding;GO:0004672//protein kinase activity;GO:0008092//cytoskeletal protein binding;GO:0005198//structural molecule activity	GO:0007266//Rho protein signal transduction;GO:0007169//transmembrane receptor protein tyrosine kinase signaling pathway;GO:0006464//cellular protein modification process;GO:0009966//regulation of signal transduction;GO:0032501//multicellular organismal process;GO:0048869//cellular developmental process	K17531//obscurin-RhoGEF [EC:2.7.11.1]	gi|403501448|ref|NP_443075.3|//obscurin isoform a [Homo sapiens];gi|403501446|ref|NP_001092093.2|//obscurin isoform b [Homo sapiens];gi|404211881|ref|NP_001258152.2|//obscurin isoform IC [Homo sapiens]
8436	3265	11	50	2.04034	5.99238e-07	Up	1.26042e-06	SDPR	GO:0044459//plasma membrane part;GO:0044444//cytoplasmic part	GO:0005543//phospholipid binding	NA	K19387//polymerase I and transcript release factor	gi|4759082|ref|NP_004648.1|//serum deprivation-response protein [Homo sapiens]
23283	4127	216	979	2.03619	1.47386e-101	Up	9.76613e-102	CSTF2T	GO:0005622//intracellular	GO:0005488//binding	NA	K14407//cleavage stimulation factor subunit 2	gi|20380061|gb|AAH28239.1|//Cleavage stimulation factor, 3' pre-RNA, subunit 2, 64kDa, tau variant [Homo sapiens]
146206	4323	43	194	2.02956	1.36919e-21	Up	1.85877e-21	CARMIL2	NA	NA	NA	K20493//leucine-rich repeat-containing protein 16	gi|49614757|dbj|BAD26751.1|//RGD, leucine-rich repeat, tropomodulin and proline-rich containing protein [Homo sapiens]
10509	3593	2076	9365	2.02939	0	Up	0	SEMA4B	GO:0031224//intrinsic component of membrane	NA	GO:0048731//system development;GO:0048869//cellular developmental process	K06521//semaphorin 4	gi|39777608|ref|NP_064595.2|//semaphorin-4B precursor [Homo sapiens];gi|37181909|gb|AAQ88758.1|//semaphorin C [Homo sapiens];gi|931595774|ref|XP_014197067.1|//PREDICTED: semaphorin-4B isoform X1 [Pan paniscus];gi|29840873|sp|Q9NPR2.3|SEM4B_HUMAN//RecName: Full=Semaphorin-4B; Flags: Precursor
7205	1762	148	666	2.02584	2.86046e-69	Up	2.27963e-69	TRIP6	GO:0043229//intracellular organelle;GO:0005924//cell-substrate adherens junction;GO:0043235//receptor complex	GO:0046872//metal ion binding;GO:0008134//transcription factor binding;GO:0019899//enzyme binding;GO:0005126//cytokine receptor binding	GO:0016477//cell migration;GO:0007044//cell-substrate junction assembly;GO:0007249//I-kappaB kinase/NF-kappaB signaling	K12792//thyroid receptor-interacting protein 6	gi|119596877|gb|EAW76471.1|//thyroid hormone receptor interactor 6, isoform CRA_a, partial [Homo sapiens]
5324	7233	12	54	2.02584	2.59659e-07	Up	5.36453e-07	PLAG1	GO:0043231//intracellular membrane-bounded organelle	GO:0046914//transition metal ion binding;GO:0001071//null;GO:0003676//nucleic acid binding	GO:0009653//anatomical structure morphogenesis;GO:0010467//gene expression;GO:0003006//developmental process involved in reproduction;GO:0040007//growth	K19484//zinc finger protein PLAG1	gi|62087842|dbj|BAD92368.1|//Pleiomorphic adenoma gene 1 variant [Homo sapiens];gi|829813228|ref|XP_012629537.1|//PREDICTED: zinc finger protein PLAG1 isoform X1 [Microcebus murinus]
51313	4809	6	27	2.02584	0.000160331	Up	0.000393239	FAM198B	GO:0043231//intracellular membrane-bounded organelle;GO:0031224//intrinsic component of membrane;GO:0012505//endomembrane system	NA	NA	NA	gi|190358490|ref|NP_001026870.2|//protein FAM198B isoform 1 [Homo sapiens];gi|32526911|ref|NP_057697.2|//protein FAM198B isoform 2 [Homo sapiens]
54865	2098	6	27	2.02584	0.000160331	Up	0.000393239	GPATCH4	NA	NA	NA	K11135//Pin2-interacting protein X1	gi|33356552|ref|NP_056405.2|//G patch domain-containing protein 4 isoform 1 [Homo sapiens] ;gi|355558570|gb|EHH15350.1|//hypothetical protein EGK_01425 [Macaca mulatta]
64219	2316	6	27	2.02584	0.000160331	Up	0.000393239	PJA1	NA	GO:0046914//transition metal ion binding;GO:0003824//catalytic activity	NA	K10633//E3 ubiquitin-protein ligase Praja1 [EC:2.3.2.27]	gi|21539663|ref|NP_071763.2|//E3 ubiquitin-protein ligase Praja-1 isoform c [Homo sapiens];gi|41281725|ref|NP_660095.1|//E3 ubiquitin-protein ligase Praja-1 isoform a [Homo sapiens]
3964	6181	2244.57	10086.5	2.02383	0	Up	0	LGALS8	GO:0044421//extracellular region part;GO:0044424//intracellular part	GO:0030246//carbohydrate binding	NA	K06832//galectin-8	gi|62089414|dbj|BAD93151.1|//Galectin-8 variant [Homo sapiens];gi|42544185|ref|NP_006490.3|//galectin-8 isoform a [Homo sapiens]
58480	4386	150	673	2.02156	8.64822e-70	Up	6.84599e-70	RHOU	GO:0012505//endomembrane system;GO:0043231//intracellular membrane-bounded organelle;GO:0015629//actin cytoskeleton;GO:0044444//cytoplasmic part;GO:0005924//cell-substrate adherens junction	GO:0043169//cation binding;GO:0032561//guanyl ribonucleotide binding;GO:0017111//nucleoside-triphosphatase activity	GO:0065008//regulation of biological quality;GO:0022402//cell cycle process;GO:0007010//cytoskeleton organization;GO:0009966//regulation of signal transduction;GO:0007265//Ras protein signal transduction	K07865//Ras homolog gene family, member U	gi|511918380|ref|XP_004778447.1|//PREDICTED: rho-related GTP-binding protein RhoU, partial [Mustela putorius furo];gi|817288595|ref|XP_012314604.1|//PREDICTED: rho-related GTP-binding protein RhoU [Aotus nancymaae]
245812	1547	15	67.28	2.02113	1.19073e-08	Up	2.31181e-08	CNPY4	NA	GO:0005515//protein binding	NA	NA	gi|22749479|ref|NP_689968.1|//protein canopy homolog 4 precursor [Homo sapiens]
9674	4574	4331	19360	2.01622	0	Up	0	KIAA0040	NA	NA	NA	NA	gi|40788942|dbj|BAA05022.2|//KIAA0040 [Homo sapiens]
100506736	1767	10.83	48.31	2.0132	1.09383e-06	Up	2.33424e-06	SLFN12L	GO:0031224//intrinsic component of membrane	GO:0032559//adenyl ribonucleotide binding	NA	NA	gi|307746919|ref|NP_001182719.1|//schlafen family member 12-like [Homo sapiens]
84725	6368	11	49	2.01119	9.43739e-07	Up	2.0081e-06	PLEKHA8	GO:0044424//intracellular part	GO:0008289//lipid binding;GO:0005319//lipid transporter activity	GO:0006810//transport	K08051//pleckstrin homology domain containing family A member 8	gi|308153327|ref|NP_001183955.1|//pleckstrin homology domain-containing family A member 8 isoform 1 [Homo sapiens];gi|14249174|ref|NP_116028.1|//pleckstrin homology domain-containing family A member 8 isoform 3 [Homo sapiens];gi|308153325|ref|NP_001183956.1|//pleckstrin homology domain-containing family A member 8 isoform 2 [Homo sapiens]
945	1325	252.55	658.98	1.23958	1.06178e-34	Up	1.17499e-34	CD33	GO:0016021//integral component of membrane	GO:0030246//carbohydrate binding;GO:0004871//signal transducer activity	GO:0008283//cell proliferation;GO:0007154//cell communication;GO:0023052//signaling	K06473//CD33 antigen	gi|130980072|ref|NP_001076087.1|//myeloid cell surface antigen CD33 isoform 2 precursor [Homo sapiens];gi|768012222|ref|XP_011525833.1|//PREDICTED: myeloid cell surface antigen CD33 isoform X2 [Homo sapiens]
29899	4180	102.8	456.54	2.00682	1.54874e-47	Up	1.47929e-47	GPSM2	GO:0031981//nuclear lumen;GO:0044444//cytoplasmic part	GO:0005515//protein binding;GO:0008047//enzyme activator activity	GO:0007166//cell surface receptor signaling pathway	K15837//G-protein signaling modulator 2	gi|164519122|ref|NP_037428.3|//G-protein-signaling modulator 2 [Homo sapiens]
79042	2265	2896.33	12803.6	2.00017	0	Up	0	TSEN34	GO:0031981//nuclear lumen;GO:0043234//protein complex	GO:0004549//tRNA-specific ribonuclease activity;GO:0005488//binding	GO:0006388//tRNA splicing, via endonucleolytic cleavage and ligation	K15323//tRNA-splicing endonuclease subunit Sen34 [EC:3.1.27.9]	gi|694976928|ref|XP_009434636.1|//PREDICTED: tRNA-splicing endonuclease subunit Sen34 isoform X1 [Pan troglodytes];gi|10438595|dbj|BAB15284.1|//unnamed protein product [Homo sapiens];gi|537361050|ref|NP_001269262.1|//tRNA-splicing endonuclease subunit Sen34 isoform 2 [Homo sapiens]
4240	1886	12	53	1.99887	4.08346e-07	Up	8.52245e-07	MFGE8	GO:0044421//extracellular region part;GO:0009986//cell surface;GO:0019898//extrinsic component of membrane	GO:0005102//receptor binding;GO:0005543//phospholipid binding	GO:0048545//response to steroid hormone;GO:0008283//cell proliferation;GO:0009566//fertilization;GO:0048646//anatomical structure formation involved in morphogenesis;GO:0051704//multi-organism process;GO:0045807//positive regulation of endocytosis;GO:0006909//phagocytosis	K17253//lactadherin	gi|167830477|ref|NP_001108086.1|//lactadherin isoform b precursor [Homo sapiens];gi|874507474|ref|NP_001297248.1|//lactadherin isoform d precursor [Homo sapiens];gi|167830475|ref|NP_005919.2|//lactadherin isoform a preproprotein [Homo sapiens];gi|874507476|ref|NP_001297249.1|//lactadherin isoform c [Homo sapiens]
1102	3105	764.17	3370.8	1.99704	0	Up	0	RCBTB2	NA	GO:0005088//Ras guanyl-nucleotide exchange factor activity	NA	K11494//RCC1 and BTB domain-containing protein	gi|913500214|ref|XP_013204737.1|//PREDICTED: RCC1 and BTB domain-containing protein 2 [Microtus ochrogaster];gi|4557445|ref|NP_001259.1|//RCC1 and BTB domain-containing protein 2 isoform 2 [Homo sapiens];gi|558472839|ref|NP_001273759.1|//RCC1 and BTB domain-containing protein 2 isoform 1 [Homo sapiens] ;gi|62088666|dbj|BAD92780.1|//RCC1-like G exchanging factor RLG variant [Homo sapiens]
339804	887	10	44	1.99342	3.43996e-06	Up	7.54967e-06	C2orf74	GO:0031224//intrinsic component of membrane	NA	NA	NA	gi|221139892|ref|NP_001137431.1|//uncharacterized protein C2orf74 isoform 1 [Homo sapiens];gi|441641867|ref|XP_004090400.1|//PREDICTED: uncharacterized protein C2orf74 homolog isoform X2 [Nomascus leucogenys];gi|441641872|ref|XP_003262479.2|//PREDICTED: uncharacterized protein C2orf74 homolog isoform X3 [Nomascus leucogenys]
127602	13788	10	44	1.99342	3.43996e-06	Up	7.54967e-06	DNAH14	GO:0005875//microtubule associated complex;GO:0005930//axoneme	GO:0032559//adenyl ribonucleotide binding;GO:0003774//motor activity	GO:0007017//microtubule-based process	K10408//dynein heavy chain, axonemal	gi|223555935|ref|NP_001364.1|//dynein heavy chain 14, axonemal isoform 1 [Homo sapiens];gi|149944493|ref|NP_659426.2|//dynein heavy chain 14, axonemal isoform 3 [Homo sapiens];gi|767912178|ref|XP_011542385.1|//PREDICTED: dynein heavy chain 14, axonemal isoform X28 [Homo sapiens]
81550	2592	5	22	1.99342	0.000600625	Up	0.00154486	TDRD3	GO:0043231//intracellular membrane-bounded organelle	GO:0042393//histone binding;GO:0003712//transcription cofactor activity	GO:0006325//chromatin organization	K18404//tudor domain-containing protein 3	gi|225703106|ref|NP_001139542.1|//tudor domain-containing protein 3 isoform 1 [Homo sapiens]
252995	3046	5	22	1.99342	0.000600625	Up	0.00154486	FNDC5	GO:0031224//intrinsic component of membrane;GO:0044439//peroxisomal part	GO:0005488//binding	NA	NA	gi|946791578|ref|XP_014404977.1|//PREDICTED: fibronectin type III domain-containing protein 5, partial [Myotis brandtii];gi|148698266|gb|EDL30213.1|//fibronectin type III domain containing 5, isoform CRA_a, partial [Mus musculus];gi|31873750|emb|CAD97840.1|//hypothetical protein [Homo sapiens]
1380	4007	5	22	1.99342	0.000600625	Up	0.00154486	CR2	GO:0031224//intrinsic component of membrane	GO:0001848//complement binding;GO:0004872//receptor activity;GO:0042802//identical protein binding	GO:0006952//defense response;GO:0002429//immune response-activating cell surface receptor signaling pathway;GO:0002455//humoral immune response mediated by circulating immunoglobulin	K04012//complement receptor type 2	gi|42544177|ref|NP_001868.2|//complement receptor type 2 isoform 2 precursor [Homo sapiens];gi|54792123|ref|NP_001006659.1|//complement receptor type 2 isoform 1 precursor [Homo sapiens]
7480	2370	5	22	1.99342	0.000600625	Up	0.00154486	WNT10B	GO:0031012//extracellular matrix;GO:0016020//membrane	GO:0060089//molecular transducer activity;GO:0005102//receptor binding	GO:0043403//skeletal muscle tissue regeneration;GO:0048639//positive regulation of developmental growth;GO:0048747//muscle fiber development;GO:0007420//brain development;GO:0008406//gonad development;GO:0000122//negative regulation of transcription from RNA polymerase II promoter;GO:0007389//pattern specification process;GO:0045597//positive regulation of cell differentiation;GO:0008285//negativ…	K01357//wingless-type MMTV integration site family, member 10	gi|532078357|ref|XP_005324955.1|//PREDICTED: protein Wnt-10b [Ictidomys tridecemlineatus]
57732	4038	20	88	1.99342	1.34938e-10	Up	2.4162e-10	ZFYVE28	GO:0005769//early endosome	GO:0046872//metal ion binding;GO:0046914//transition metal ion binding;GO:0035091//phosphatidylinositol binding	GO:0007176//regulation of epidermal growth factor-activated receptor activity	K18082//myotubularin-related protein 3/4 [EC:3.1.3.48 3.1.3.64 3.1.3.95];K17603//zinc finger FYVE domain-containing protein 1	gi|289547647|ref|NP_001166128.1|//lateral signaling target protein 2 homolog isoform 4 [Homo sapiens];gi|289547645|ref|NP_001166127.1|//lateral signaling target protein 2 homolog isoform 3 [Homo sapiens];gi|289547649|ref|NP_001166129.1|//lateral signaling target protein 2 homolog isoform 5 [Homo sapiens];gi|289547643|ref|NP_066023.2|//lateral signaling target protein 2 homolog isoform 2 [Homo sap…
9324	1157	15	66	1.99342	2.12102e-08	Up	4.16087e-08	HMGN3	GO:0031981//nuclear lumen;GO:0044427//chromosomal part	GO:0005515//protein binding;GO:0005488//binding;GO:0008134//transcription factor binding;GO:0003676//nucleic acid binding	GO:0006325//chromatin organization	K11301//high-mobility group nucleosome-binding domain-containing protein 3	gi|931572998|ref|XP_008973575.2|//PREDICTED: high mobility group nucleosome-binding domain-containing protein 3 isoform X2 [Pan paniscus];gi|931572996|ref|XP_008973568.2|//PREDICTED: high mobility group nucleosome-binding domain-containing protein 3 isoform X1 [Pan paniscus];gi|927071|gb|AAA73877.1|//thyroid receptor interactor, partial [Homo sapiens]
2209	2268	905.22	3972.96	1.98979	0	Up	0	FCGR1A	GO:0031224//intrinsic component of membrane	GO:0019865//immunoglobulin binding;GO:0004871//signal transducer activity	GO:0002376//immune system process;GO:0006952//defense response;GO:0019221//cytokine-mediated signaling pathway;GO:0006909//phagocytosis	K06498//high affinity immunoglobulin gamma Fc receptor I	gi|10835133|ref|NP_000557.1|//high affinity immunoglobulin gamma Fc receptor I precursor [Homo sapiens]
53829	2769	8303	36417	1.98882	0	Up	0	P2RY13	GO:0043231//intracellular membrane-bounded organelle;GO:0031224//intrinsic component of membrane	GO:0001608//G-protein coupled nucleotide receptor activity	NA	K08388//purinergic receptor P2Y, G protein-coupled, 13	gi|194294562|ref|NP_795713.2|//P2Y purinoceptor 13 [Homo sapiens]
3082	3279	21	92	1.98716	5.88387e-11	Up	1.03852e-10	HGF	GO:0031091//platelet alpha granule	GO:0004175//endopeptidase activity;GO:0005102//receptor binding	GO:0001775//cell activation;GO:0000087//mitotic M phase;GO:0019538//protein metabolic process;GO:0060638//mesenchymal-epithelial cell signaling;GO:0007599//hemostasis;GO:0000904//cell morphogenesis involved in differentiation;GO:0006887//exocytosis	K05460//hepatocyte growth factor	gi|33859835|ref|NP_000592.3|//hepatocyte growth factor isoform 1 preproprotein [Homo sapiens];gi|62087380|dbj|BAD92137.1|//hepatocyte growth factor isoform 1 preproprotein variant [Homo sapiens];gi|58533163|ref|NP_001010931.1|//hepatocyte growth factor isoform 2 precursor [Homo sapiens];gi|58533165|ref|NP_001010933.1|//hepatocyte growth factor isoform 4 precursor [Homo sapiens];gi|58533170|ref|NP…
342125	3303	8	35	1.9852	2.92382e-05	Up	6.81455e-05	TMC3	GO:0031224//intrinsic component of membrane	NA	NA	K10877//DNA repair and recombination protein RAD54B [EC:3.6.4.-]	gi|122937502|ref|NP_001074001.1|//transmembrane channel-like protein 3 [Homo sapiens]
3945	1374	71	310	1.98229	2.08875e-32	Up	2.38365e-32	LDHB	GO:0043231//intracellular membrane-bounded organelle;GO:0044444//cytoplasmic part	GO:0004457//lactate dehydrogenase activity;GO:0005515//protein binding;GO:0000166//nucleotide binding	GO:0032787//monocarboxylic acid metabolic process;GO:0006007//glucose catabolic process;GO:0046496//nicotinamide nucleotide metabolic process	K00016//L-lactate dehydrogenase [EC:1.1.1.27]	gi|937827788|ref|NP_001302466.1|//L-lactate dehydrogenase B chain isoform LDHBx [Homo sapiens];gi|927131538|ref|XP_013843801.1|//PREDICTED: L-lactate dehydrogenase B chain [Sus scrofa]
493	8765	3508	15276	1.97846	0	Up	0	ATP2B4	GO:0016021//integral component of membrane	GO:0046873//metal ion transmembrane transporter activity;GO:0043169//cation binding;GO:0005515//protein binding;GO:0032559//adenyl ribonucleotide binding;GO:0019829//cation-transporting ATPase activity	GO:0001775//cell activation;GO:0009206//purine ribonucleoside triphosphate biosynthetic process;GO:0006816//calcium ion transport;GO:0048856//anatomical structure development;GO:0007599//hemostasis;GO:0006811//ion transport	K05850//Ca2+ transporting ATPase, plasma membrane [EC:3.6.3.8]	gi|48255959|ref|NP_001001396.1|//plasma membrane calcium-transporting ATPase 4 isoform 4a [Homo sapiens];gi|48255957|ref|NP_001675.3|//plasma membrane calcium-transporting ATPase 4 isoform 4b [Homo sapiens]
9080	2139	200	869.86	1.9767	4.24646e-87	Up	3.03934e-87	CLDN9	GO:0043296//apical junction complex	GO:0005515//protein binding	GO:0007043//cell-cell junction assembly;GO:0016337//null	K06087//claudin	gi|11141861|ref|NP_066192.1|//claudin-9 [Homo sapiens]
10666	2634	12	52	1.97139	6.40939e-07	Up	1.34993e-06	CD226	GO:0016021//integral component of membrane	GO:0019900//kinase binding;GO:0005102//receptor binding;GO:0004871//signal transducer activity	GO:0002696//positive regulation of leukocyte activation;GO:0002714//positive regulation of B cell mediated immunity;GO:0023052//signaling;GO:0002420//natural killer cell mediated cytotoxicity directed against tumor cell target;GO:0032501//multicellular organismal process;GO:0001912//positive regulation of leukocyte mediated cytotoxicity	K06567//CD226 antigen	gi|171460997|ref|NP_006557.2|//CD226 antigen isoform a precursor [Homo sapiens];gi|817300726|ref|XP_012320813.1|//PREDICTED: CD226 antigen isoform X1 [Aotus nancymaae]
9332	4107	6	26	1.97139	0.000254175	Up	0.000633333	CD163	GO:0016021//integral component of membrane	GO:0004888//transmembrane signaling receptor activity;GO:0005488//binding	GO:0002526//acute inflammatory response	K06545//CD163 antigen	gi|344179112|ref|NP_981961.2|//scavenger receptor cysteine-rich type 1 protein M130 isoform b precursor [Homo sapiens];gi|344179110|ref|NP_004235.4|//scavenger receptor cysteine-rich type 1 protein M130 isoform a precursor [Homo sapiens]
387856	2380	6	26	1.97139	0.000254175	Up	0.000633333	CCDC184	GO:0044424//intracellular part	NA	NA	NA	gi|62739231|gb|AAH36801.1|//Chromosome 12 open reading frame 68 [Homo sapiens]
5149	763	6	26	1.97139	0.000254175	Up	0.000633333	PDE6H	NA	GO:0004114//3',5'-cyclic-nucleotide phosphodiesterase activity;GO:0030234//enzyme regulator activity;GO:0019002//GMP binding	GO:0000165//MAPK cascade;GO:0008277//regulation of G-protein coupled receptor protein signaling pathway;GO:0050953//sensory perception of light stimulus;GO:0009967//positive regulation of signal transduction	K13760//retinal cone rhodopsin-sensitive cGMP 3',5'-cyclic phosphodiesterase subunit gamma	gi|545546235|ref|XP_853743.2|//PREDICTED: retinal cone rhodopsin-sensitive cGMP 3',5'-cyclic phosphodiesterase subunit gamma isoform X1 [Canis lupus familiaris]
8343	430	13.81	59.61	1.96576	1.18893e-07	Up	2.41688e-07	HIST1H2BF	GO:0043231//intracellular membrane-bounded organelle	GO:0003676//nucleic acid binding	GO:0034728//nucleosome organization	K11252//histone H2B	gi|913499544|ref|XP_013204527.1|//PREDICTED: uncharacterized protein LOC101998036 [Microtus ochrogaster]
4495	420	11.81	50.97	1.96555	8.47663e-07	Up	1.79867e-06	MT1G	NA	NA	NA	K14739//metallothionein 1/2	gi|410034656|ref|XP_003308881.2|//PREDICTED: metallothionein 1H-like protein 1 [Pan troglodytes]
120224	1796	197	850	1.96518	1.62659e-84	Up	1.17609e-84	TMEM45B	GO:0031224//intrinsic component of membrane	NA	NA	NA	gi|20270331|ref|NP_620143.1|//transmembrane protein 45B [Homo sapiens]
390036	1030	74.83	322.83	1.965	2.64136e-33	Up	2.98088e-33	OR52K1	GO:0031224//intrinsic component of membrane	GO:0004930//G-protein coupled receptor activity	GO:0007606//sensory perception of chemical stimulus	K04257//olfactory receptor	gi|284005406|ref|NP_001005171.2|//olfactory receptor 52K1 [Homo sapiens]
57001	2068	83	358	1.96469	1.02462e-36	Up	1.10824e-36	SDHAF3	GO:0005740//mitochondrial envelope	NA	GO:0006094//gluconeogenesis	NA	gi|9910180|ref|NP_064571.1|//succinate dehydrogenase assembly factor 3, mitochondrial precursor [Homo sapiens]
57699	2480	48	207	1.96444	4.94618e-22	Up	6.65776e-22	CPNE5	GO:0044297//cell body;GO:0042995//cell projection	NA	NA	K19910//synaptotagmin-10;K06491//neural cell adhesion molecule;K15290//synaptotagmin-1;K11348//bromodomain and PHD finger-containing protein 1	gi|987410428|ref|XP_015394439.1|//PREDICTED: copine-5 [Panthera tigris altaica];gi|982245975|ref|XP_015304966.1|//PREDICTED: copine-5 isoform X4 [Macaca fascicularis];gi|25141323|ref|NP_065990.1|//copine-5 isoform a [Homo sapiens];gi|119624317|gb|EAX03912.1|//copine V, isoform CRA_b [Homo sapiens]
10628	2962	53414	230250	1.96383	0	Up	0	TXNIP	GO:0005740//mitochondrial envelope	GO:0030234//enzyme regulator activity;GO:0019899//enzyme binding	GO:0006605//protein targeting;GO:0009913//epidermal cell differentiation;GO:0009605//response to external stimulus;GO:0009746//response to hexose;GO:0043627//response to estrogen;GO:0006915//apoptotic process;GO:0000302//response to reactive oxygen species;GO:0006357//regulation of transcription from RNA polymerase II promoter;GO:0007169//transmembrane receptor protein tyrosine kinase signaling p…	NA	gi|171184421|ref|NP_006463.3|//thioredoxin-interacting protein isoform 1 [Homo sapiens];gi|928192549|ref|NP_001300901.1|//thioredoxin-interacting protein isoform 2 [Homo sapiens]
55437	2300	13	56	1.96283	2.76455e-07	Up	5.72395e-07	STRADB	GO:0043231//intracellular membrane-bounded organelle;GO:0044444//cytoplasmic part	GO:0032559//adenyl ribonucleotide binding;GO:0016301//kinase activity	GO:0019217//regulation of fatty acid metabolic process;GO:0006605//protein targeting;GO:0007169//transmembrane receptor protein tyrosine kinase signaling pathway;GO:0022402//cell cycle process;GO:0045860//positive regulation of protein kinase activity	K17532//STE20-related kinase adapter protein beta	gi|13027388|ref|NP_061041.2|//STE20-related kinase adapter protein beta isoform 1 [Homo sapiens]
5243	4718	10	43	1.96025	5.40398e-06	Up	1.19861e-05	ABCB1	GO:0012505//endomembrane system;GO:0031224//intrinsic component of membrane;GO:0005911//cell-cell junction	GO:0032559//adenyl ribonucleotide binding;GO:0042626//ATPase activity, coupled to transmembrane movement of substances	GO:0006810//transport;GO:0042221//response to chemical;GO:0009207//purine ribonucleoside triphosphate catabolic process	K05658//ATP-binding cassette, subfamily B (MDR/TAP), member 1 [EC:3.6.3.44]	gi|694922294|ref|XP_009451772.1|//PREDICTED: multidrug resistance protein 1 isoform X1 [Pan troglodytes]
79660	5581	7622.68	32754	1.95921	0	Up	0	PPP1R3B	NA	NA	GO:0006073//cellular glucan metabolic process	K07189//protein phosphatase 1 regulatory subunit 3A/B/C/D/E	gi|153792466|ref|NP_078883.2|//protein phosphatase 1 regulatory subunit 3B [Homo sapiens]
5551	2529	175	750.22	1.95587	2.28226e-74	Up	1.7515e-74	PRF1	GO:0044440//endosomal part;GO:0031224//intrinsic component of membrane;GO:0031410//cytoplasmic vesicle;GO:0005764//lysosome	GO:0046872//metal ion binding;GO:0015267//channel activity	GO:0002347//response to tumor cell;GO:0010033//response to organic substance;GO:0006952//defense response;GO:0012501//programmed cell death;GO:0002252//immune effector process;GO:0048511//rhythmic process;GO:0051259//protein oligomerization	K07818//perforin 1	gi|675735503|ref|XP_008967205.1|//PREDICTED: perforin-1 isoform X1 [Pan paniscus];gi|40254808|ref|NP_005032.2|//perforin-1 precursor [Homo sapiens]
5727	7658	21	90	1.95545	1.42928e-10	Up	2.56047e-10	PTCH1	GO:0016021//integral component of membrane	GO:0004888//transmembrane signaling receptor activity;GO:0005539//glycosaminoglycan binding;GO:0005102//receptor binding	GO:0014020//primary neural tube formation;GO:0009953//dorsal/ventral pattern formation;GO:0048732//gland development;GO:0043627//response to estrogen;GO:0035108//limb morphogenesis;GO:0035264//multicellular organism growth;GO:0033500//carbohydrate homeostasis;GO:0009887//animal organ morphogenesis;GO:0010035//response to inorganic substance;GO:0051604//protein maturation;GO:0007224//smoothened si…	K06225//patched 1	gi|134254446|ref|NP_000255.2|//protein patched homolog 1 isoform L [Homo sapiens];gi|134254432|ref|NP_001077072.1|//protein patched homolog 1 isoform L' [Homo sapiens];gi|134254466|ref|NP_001077071.1|//protein patched homolog 1 isoform M [Homo sapiens]
2191	2762	7	30	1.95545	0.00010793	Up	0.000261471	FAP	GO:0031224//intrinsic component of membrane;GO:0031253//cell projection membrane;GO:0030027//lamellipodium	GO:0004175//endopeptidase activity;GO:0008238//exopeptidase activity;GO:0042802//identical protein binding	GO:0016477//cell migration;GO:0019538//protein metabolic process;GO:0010715//regulation of extracellular matrix disassembly	K08674//fibroblast activation protein, alpha [EC:3.4.21.-]	gi|16933540|ref|NP_004451.2|//prolyl endopeptidase FAP isoform 1 [Homo sapiens];gi|620597362|ref|NP_001278736.1|//prolyl endopeptidase FAP isoform 2 [Homo sapiens]
8445	6102	98	419	1.95201	2.71305e-42	Up	2.73929e-42	DYRK2	GO:0031981//nuclear lumen	GO:0032559//adenyl ribonucleotide binding;GO:0004672//protein kinase activity;GO:0046914//transition metal ion binding	GO:0008630//intrinsic apoptotic signaling pathway in response to DNA damage;GO:0006464//cellular protein modification process;GO:0005979//regulation of glycogen biosynthetic process	K18669//dual specificity tyrosine-phosphorylation-regulated kinase 2/3/4 [EC:2.7.12.1]	gi|821001936|ref|XP_012355743.1|//PREDICTED: dual specificity tyrosine-phosphorylation-regulated kinase 2 isoform X3 [Nomascus leucogenys];gi|153281169|ref|NP_006473.2|//dual specificity tyrosine-phosphorylation-regulated kinase 2 isoform 2 [Homo sapiens]
140032	888	8.03	34.33	1.95191	4.0712e-05	Up	9.59286e-05	RPS4Y2	GO:0015935//small ribosomal subunit	GO:0003723//RNA binding;GO:0005198//structural molecule activity	GO:0031016//pancreas development;GO:0019080//viral gene expression;GO:0008283//cell proliferation;GO:0006412//translation	K02987//small subunit ribosomal protein S4e	gi|88703062|ref|NP_001034656.1|//40S ribosomal protein S4, Y isoform 2 [Homo sapiens]
22807	9443	22	94	1.95107	6.21983e-11	Up	1.09869e-10	IKZF2	NA	NA	NA	K09220//IKAROS family zinc finger protein	gi|530370002|ref|XP_005246443.1|//PREDICTED: zinc finger protein Helios isoform X6 [Homo sapiens];gi|119590911|gb|EAW70505.1|//zinc finger protein, subfamily 1A, 2 (Helios), isoform CRA_d [Homo sapiens]
4552	3291	75	320	1.94902	1.0738e-32	Up	1.22118e-32	MTRR	GO:0044444//cytoplasmic part	GO:0000166//nucleotide binding;GO:0046914//transition metal ion binding;GO:0016723//oxidoreductase activity, oxidizing metal ions, NAD or NADP as acceptor;GO:0050662//coenzyme binding	GO:0000097//sulfur amino acid biosynthetic process	K00597//methionine synthase reductase [EC:1.16.1.8]	gi|767934431|ref|XP_011512345.1|//PREDICTED: methionine synthase reductase isoform X2 [Homo sapiens];gi|169790958|ref|NP_002445.2|//methionine synthase reductase isoform 1 [Homo sapiens];gi|169790956|ref|NP_076915.2|//methionine synthase reductase isoform 2 [Homo sapiens]
29765	1322	8.01	34.05	1.94369	4.53349e-05	Up	0.000107114	TMOD4	GO:0043232//intracellular non-membrane-bounded organelle	GO:0008092//cytoskeletal protein binding	GO:0003012//muscle system process	K10370//tropomodulin	gi|156415984|ref|NP_037485.2|//tropomodulin-4 [Homo sapiens]
135927	774	24	102	1.94338	1.17847e-11	Up	2.02638e-11	C7orf34	NA	NA	NA	NA	gi|694924551|ref|XP_003318901.2|//PREDICTED: uncharacterized protein C7orf34 homolog [Pan troglodytes]
2039	2340	20	85	1.94338	5.12265e-10	Up	9.35832e-10	DMTN	GO:0005856//cytoskeleton;GO:0043231//intracellular membrane-bounded organelle	GO:0008092//cytoskeletal protein binding	GO:0030835//negative regulation of actin filament depolymerization	K07520//actin-binding LIM protein;K14411//RNA-binding protein Musashi	gi|166706885|ref|NP_001107611.1|//dematin isoform 3 [Homo sapiens];gi|544450747|ref|XP_005562815.1|//PREDICTED: dematin isoform X5 [Macaca fascicularis];gi|441621517|ref|XP_003272885.2|//PREDICTED: dematin [Nomascus leucogenys];gi|166706875|ref|NP_001969.2|//dematin isoform 1 [Homo sapiens];gi|544450729|ref|XP_005562806.1|//PREDICTED: dematin isoform X2 [Macaca fascicularis];gi|166706881|ref|NP_0…
976	3274	44902.9	120940	1.28533	0	Up	0	ADGRE5	GO:0044421//extracellular region part;GO:0016021//integral component of membrane	GO:0046872//metal ion binding;GO:0004888//transmembrane signaling receptor activity	GO:0007186//G-protein coupled receptor signaling pathway;GO:0002376//immune system process;GO:0006952//defense response;GO:0007154//cell communication	K08446//CD97 antigen	gi|17978489|ref|NP_001775.2|//CD97 antigen isoform 2 preproprotein [Homo sapiens];gi|17978491|ref|NP_510966.1|//CD97 antigen isoform 1 preproprotein [Homo sapiens];gi|68508955|ref|NP_001020331.1|//CD97 antigen isoform 3 preproprotein [Homo sapiens]
9994	6742	125	528	1.93452	3.50194e-52	Up	3.18056e-52	CASP8AP2	GO:0043231//intracellular membrane-bounded organelle	GO:0003712//transcription cofactor activity;GO:0032813//tumor necrosis factor receptor superfamily binding;GO:0016505//peptidase activator activity involved in apoptotic process	GO:0009612//response to mechanical stimulus;GO:0023052//signaling	K14572//midasin;K19326//nesprin-1;K13165//splicing factor, arginine/serine-rich 12	gi|6912288|ref|NP_036247.1|//CASP8-associated protein 2 [Homo sapiens]
7107	2046	23	97	1.93226	4.19371e-11	Up	7.37255e-11	GPR137B	GO:0016021//integral component of membrane	NA	NA	NA	gi|931565482|ref|XP_008976446.2|//PREDICTED: LOW QUALITY PROTEIN: integral membrane protein GPR137B [Pan paniscus]
11000	2430	217	913	1.92883	1.81564e-88	Up	1.28574e-88	SLC27A3	GO:0031224//intrinsic component of membrane;GO:0005740//mitochondrial envelope	GO:0016408//C-acyltransferase activity;GO:0005488//binding	GO:0032787//monocarboxylic acid metabolic process;GO:0044238//primary metabolic process	K08772//solute carrier family 27 (fatty acid transporter), member 3 [EC:6.2.1.-]	gi|57161864|emb|CAE12159.1|//very long-chain acyl-CoA synthetase homologue 3 [Homo sapiens];gi|119573659|gb|EAW53274.1|//solute carrier family 27 (fatty acid transporter), member 3, isoform CRA_a, partial [Homo sapiens]
445347	1027	35	147	1.9263	8.02498e-16	Up	1.23264e-15	TARP	NA	NA	NA	K10785//T-cell receptor beta chain V region	gi|449142731|gb|AGE91788.1|//Vgamma9ChainTCRMOP [Homo sapiens]
92291	2690	15	63	1.9263	8.06638e-08	Up	1.62344e-07	CAPN13	GO:0044464//cell part	GO:0046872//metal ion binding;GO:0004197//cysteine-type endopeptidase activity	GO:0019538//protein metabolic process	K08581//calpain-13 [EC:3.4.22.-]	gi|41152101|ref|NP_653176.2|//calpain-13 [Homo sapiens]
29946	1435	1316	5527	1.92625	0	Up	0	SERTAD3	GO:0043231//intracellular membrane-bounded organelle	GO:0005488//binding	GO:0016049//cell growth	K10267//F-box and WD-40 domain protein 12/13/14/15/16/17/19	gi|675718468|ref|XP_008963162.1|//PREDICTED: SERTA domain-containing protein 3 isoform X1 [Pan paniscus]
753	8576	92	386	1.92481	1.9783e-38	Up	2.09638e-38	LDLRAD4	GO:0031224//intrinsic component of membrane	NA	NA	NA	gi|442734421|ref|NP_001263180.1|//low-density lipoprotein receptor class A domain-containing protein 4 isoform epsilon 1 [Homo sapiens];gi|41281957|ref|NP_852147.1|//low-density lipoprotein receptor class A domain-containing protein 4 isoform alpha 2 [Homo sapiens];gi|767997879|ref|XP_011524039.1|//PREDICTED: low-density lipoprotein receptor class A domain-containing protein 4 isoform X3 [Homo sa…
83855	2904	2207	9257	1.92437	0	Up	0	KLF16	GO:0043231//intracellular membrane-bounded organelle	GO:0046914//transition metal ion binding;GO:0001071//null	GO:0007186//G-protein coupled receptor signaling pathway;GO:0006355//regulation of transcription, DNA-templated	K09208//krueppel-like factor 9/13/14/16	gi|635034956|ref|XP_007992853.1|//PREDICTED: Krueppel-like factor 16 [Chlorocebus sabaeus]
30061	3381	920	3856	1.92331	0	Up	0	SLC40A1	GO:0030136//clathrin-coated vesicle;GO:0016021//integral component of membrane	GO:0022890//inorganic cation transmembrane transporter activity;GO:0005488//binding	GO:0032502//developmental process;GO:0006826//iron ion transport;GO:0006875//cellular metal ion homeostasis	K14685//solute carrier family 40 (iron-regulated transporter), member 1	gi|675781715|ref|XP_003825314.2|//PREDICTED: solute carrier family 40 member 1 [Pan paniscus]
85302	4696	21	88	1.92303	3.44905e-10	Up	6.26504e-10	FBF1	NA	NA	NA	K16471//Fas-binding factor 1	gi|983904490|ref|NP_001306122.1|//fas-binding factor 1 isoform 1 [Homo sapiens]
60678	2252	6	25.13	1.92229	0.000377934	Up	0.000954556	EEFSEC	GO:0043231//intracellular membrane-bounded organelle	GO:0008135//translation factor activity, RNA binding;GO:0032561//guanyl ribonucleotide binding;GO:0017111//nucleoside-triphosphatase activity	GO:0006412//translation;GO:0009207//purine ribonucleoside triphosphate catabolic process	K03833//selenocysteine-specific elongation factor	gi|54607086|ref|NP_068756.2|//selenocysteine-specific elongation factor [Homo sapiens]
51409	5902	20	83.74	1.92183	8.90243e-10	Up	1.64385e-09	HEMK1	GO:0043231//intracellular membrane-bounded organelle	GO:0008168//methyltransferase activity;GO:0003676//nucleic acid binding	GO:0006305//DNA alkylation	K02493//release factor glutamine methyltransferase [EC:2.1.1.297]	gi|7705409|ref|NP_057257.1|//hemK methyltransferase family member 1 [Homo sapiens]
63943	1357	106	443	1.91916	1.18495e-43	Up	1.17976e-43	FKBPL	GO:0043231//intracellular membrane-bounded organelle	GO:0005527//macrolide binding;GO:0016859//cis-trans isomerase activity	GO:0018193//peptidyl-amino acid modification;GO:0009628//response to abiotic stimulus	K20097//FK506-binding protein-like	gi|635095960|ref|XP_007971213.1|//PREDICTED: FK506-binding protein-like isoform X1 [Chlorocebus sabaeus]
91523	2121	60	250.63	1.91844	1.60225e-25	Up	2.03107e-25	PCED1B	NA	GO:0003824//catalytic activity	NA	NA	gi|19923901|ref|NP_612380.1|//PC-esterase domain-containing protein 1B [Homo sapiens]
155066	2635	19	79	1.91177	2.83402e-09	Up	5.34856e-09	ATP6V0E2	NA	NA	NA	K02153//V-type H+-transporting ATPase subunit e	gi|154689796|ref|NP_001094062.1|//V-type proton ATPase subunit e 2 isoform 2 [Homo sapiens];gi|585635062|ref|NP_001276919.1|//V-type proton ATPase subunit e 2 isoform 3 [Homo sapiens]
27065	2546	15.18	63	1.90909	9.51201e-08	Up	1.9224e-07	NSG1	GO:0031224//intrinsic component of membrane;GO:0043231//intracellular membrane-bounded organelle;GO:0012505//endomembrane system	GO:0001664//G-protein coupled receptor binding	GO:0007186//G-protein coupled receptor signaling pathway	K15493//neuron-specific vesicular protein calcyon	gi|119602836|gb|EAW82430.1|//DNA segment on chromosome 4 (unique) 234 expressed sequence, isoform CRA_a [Homo sapiens];gi|426343698|ref|XP_004038428.1|//PREDICTED: neuron-specific protein family member 1-like isoform 3 [Gorilla gorilla gorilla]
54816	4794	54	224	1.90838	7.31657e-23	Up	9.66747e-23	ZNF280D	GO:0043231//intracellular membrane-bounded organelle;GO:0005622//intracellular	GO:0046872//metal ion binding;GO:0046914//transition metal ion binding;GO:0003676//nucleic acid binding	NA	K09228//KRAB domain-containing zinc finger protein;K08776//puromycin-sensitive aminopeptidase [EC:3.4.11.-]	gi|119597911|gb|EAW77505.1|//suppressor of hairy wing homolog 4 (Drosophila), isoform CRA_b [Homo sapiens];gi|119597910|gb|EAW77504.1|//suppressor of hairy wing homolog 4 (Drosophila), isoform CRA_a [Homo sapiens];gi|694959680|ref|XP_001171708.3|//PREDICTED: zinc finger protein 280D isoform X2 [Pan troglodytes]
84230	7207	118.43	490.88	1.90725	8.9006e-48	Up	8.48645e-48	LRRC8C	GO:0043231//intracellular membrane-bounded organelle;GO:0031224//intrinsic component of membrane;GO:0031090//organelle membrane	NA	NA	K19613//leucine-rich repeat protein SHOC2	gi|578799912|ref|XP_006711023.1|//PREDICTED: volume-regulated anion channel subunit LRRC8C isoform X2 [Homo sapiens]
643866	2360	7	29	1.90654	0.000169408	Up	0.0004165	CBLN3	GO:0044459//plasma membrane part	NA	NA	K18744//caprin-2	gi|685553416|ref|XP_009209589.1|//PREDICTED: protein KHNYN isoform X1 [Papio anubis]
50650	3612	164	679	1.90563	2.90833e-65	Up	2.37499e-65	ARHGEF3	GO:0044444//cytoplasmic part	GO:0005088//Ras guanyl-nucleotide exchange factor activity	GO:0007169//transmembrane receptor protein tyrosine kinase signaling pathway;GO:0007266//Rho protein signal transduction;GO:0009966//regulation of signal transduction	K20045//intersectin	gi|62088902|dbj|BAD92898.1|//Rho guanine nucleotide exchange factor 3 variant [Homo sapiens];gi|803243135|ref|XP_011981647.1|//PREDICTED: rho guanine nucleotide exchange factor 3 isoform X1 [Ovis aries musimon];gi|635119597|ref|XP_007982868.1|//PREDICTED: rho guanine nucleotide exchange factor 3 isoform X1 [Chlorocebus sabaeus];gi|190885495|ref|NP_001122087.1|//rho guanine nucleotide exchange fac…
9880	6256	15	62	1.90322	1.24946e-07	Up	2.54239e-07	ZBTB39	GO:0043231//intracellular membrane-bounded organelle	GO:0046914//transition metal ion binding;GO:0003676//nucleic acid binding	NA	K10511//zinc finger and BTB domain-containing protein 39	gi|7662072|ref|NP_055645.1|//zinc finger and BTB domain-containing protein 39 [Homo sapiens]
51315	1820	178	735	1.90178	2.67542e-70	Up	2.11111e-70	KRCC1	NA	NA	NA	NA	gi|7706156|ref|NP_057702.1|//lysine-rich coiled-coil protein 1 [Homo sapiens]
23600	3229	79.54	328.38	1.90153	1.76433e-32	Up	2.01194e-32	AMACR	GO:0044439//peroxisomal part	GO:0016854//racemase and epimerase activity	GO:0006694//steroid biosynthetic process;GO:0006635//fatty acid beta-oxidation	K01796//alpha-methylacyl-CoA racemase [EC:5.1.99.4]	gi|42794625|ref|NP_055139.4|//alpha-methylacyl-CoA racemase isoform 1 [Homo sapiens];gi|266456254|ref|NP_001161067.1|//alpha-methylacyl-CoA racemase isoform 3 [Homo sapiens];gi|148342485|gb|ABQ59031.1|//AMACR protein [Homo sapiens]
51466	1853	214	882	1.89908	8.21787e-84	Up	5.97187e-84	EVL	GO:0031252//cell leading edge;GO:0044444//cytoplasmic part;GO:0005924//cell-substrate adherens junction	GO:0019904//protein domain specific binding	GO:0009653//anatomical structure morphogenesis;GO:0007015//actin filament organization;GO:0007165//signal transduction;GO:0006935//chemotaxis;GO:0048731//system development	K05746//enabled	gi|685555868|ref|XP_009210501.1|//PREDICTED: ena/VASP-like protein isoform X1 [Papio anubis];gi|6563206|gb|AAF17197.1|AF112209_1//Ena-VASP-like protein [Homo sapiens]
3710	9047	61	251	1.89672	3.37278e-25	Up	4.29536e-25	ITPR3	GO:0031981//nuclear lumen;GO:0042995//cell projection;GO:0044297//cell body;GO:0031965//nuclear membrane;GO:0016021//integral component of membrane	GO:0004872//receptor activity;GO:0005217//intracellular ligand-gated ion channel activity;GO:0043178//alcohol binding;GO:0005261//cation channel activity;GO:0005543//phospholipid binding	GO:0050909//sensory perception of taste;GO:0030073//insulin secretion;GO:0010863//positive regulation of phospholipase C activity;GO:0015980//energy derivation by oxidation of organic compounds;GO:0001775//cell activation;GO:0007169//transmembrane receptor protein tyrosine kinase signaling pathway;GO:0007204//positive regulation of cytosolic calcium ion concentration;GO:0007599//hemostasis;GO:001…	K04960//inositol 1,4,5-triphosphate receptor type 3	gi|153945846|ref|NP_002215.2|//inositol 1,4,5-trisphosphate receptor type 3 [Homo sapiens]
9046	1814	80	329	1.89593	2.04141e-32	Up	2.32905e-32	DOK2	GO:0044444//cytoplasmic part	GO:0005102//receptor binding	GO:0002376//immune system process;GO:0007264//small GTPase mediated signal transduction;GO:0007167//enzyme linked receptor protein signaling pathway;GO:0007599//hemostasis	K20234//docking protein 2	gi|41406050|ref|NP_003965.2|//docking protein 2 isoform a [Homo sapiens]
392490	2269	291.7	1198.74	1.89488	7.16144e-113	Up	4.48774e-113	FLJ44635	GO:0044421//extracellular region part;GO:0005770//late endosome;GO:0043234//protein complex	GO:0046872//metal ion binding	GO:0006875//cellular metal ion homeostasis;GO:0043066//negative regulation of apoptotic process;GO:0051707//response to other organism;GO:0070838//divalent metal ion transport	NA	gi|795286927|ref|XP_011814273.1|//PREDICTED: LOW QUALITY PROTEIN: TPT1-like protein [Colobus angolensis palliatus]
84986	5469	690	2833	1.89358	8.53553e-264	Up	3.31003e-264	ARHGAP19	GO:0043231//intracellular membrane-bounded organelle;GO:0044444//cytoplasmic part	GO:0008047//enzyme activator activity	GO:0035556//intracellular signal transduction;GO:0009966//regulation of signal transduction	K18470//Rho GTPase-activating protein 1	gi|795553711|ref|XP_011906733.1|//PREDICTED: rho GTPase-activating protein 19 isoform X2 [Cercocebus atys];gi|795553716|ref|XP_011906734.1|//PREDICTED: rho GTPase-activating protein 19 isoform X3 [Cercocebus atys];gi|635055436|ref|XP_007961919.1|//PREDICTED: rho GTPase-activating protein 19 isoform X1 [Chlorocebus sabaeus]
128611	9419	59	242	1.89213	2.73957e-24	Up	3.5313e-24	ZNF831	GO:0044464//cell part	GO:0046914//transition metal ion binding	NA	K09239//human immunodeficiency virus type I enhancer-binding protein	gi|123701326|ref|NP_848552.1|//zinc finger protein 831 [Homo sapiens]
1084	1159	4294.41	11478.2	1.27428	0	Up	0	CEACAM3	GO:0031224//intrinsic component of membrane;GO:0016021//integral component of membrane	NA	GO:0023052//signaling;GO:0007154//cell communication	K06499//carcinoembryonic antigen-related cell adhesion molecule	gi|694975268|ref|XP_009433932.1|//PREDICTED: LOW QUALITY PROTEIN: carcinoembryonic antigen-related cell adhesion molecule 3 [Pan troglodytes];gi|121114300|ref|NP_001806.2|//carcinoembryonic antigen-related cell adhesion molecule 3 isoform 1 precursor [Homo sapiens];gi|461496471|ref|NP_001264092.1|//carcinoembryonic antigen-related cell adhesion molecule 3 isoform 2 precursor [Homo sapiens]
57507	5645	34	139	1.88739	1.04965e-14	Up	1.65681e-14	ZNF608	NA	GO:0046872//metal ion binding	NA	K06783//cell adhesion molecule 4;K10847//DNA-repair protein complementing XP-A cells	gi|153945755|ref|NP_065798.2|//zinc finger protein 608 [Homo sapiens]
27284	1320	428	1749	1.88676	7.70639e-163	Up	3.95868e-163	SULT1B1	GO:0044444//cytoplasmic part	GO:0008146//sulfotransferase activity	GO:0006790//sulfur compound metabolic process;GO:0006575//cellular modified amino acid metabolic process;GO:0009698//phenylpropanoid metabolic process;GO:0006066//alcohol metabolic process;GO:0006629//lipid metabolic process	K01025//null	gi|171849133|pdb|3CKL|A//Chain A, Crystal Structure Of Human Cytosolic Sulfotransferase Sult1b1 In Complex With Pap And Resveratrol
155038	4196	81	331	1.88675	2.10837e-32	Up	2.40663e-32	GIMAP8	GO:0043231//intracellular membrane-bounded organelle	GO:0000166//nucleotide binding	NA	NA	gi|28416956|ref|NP_783161.1|//GTPase IMAP family member 8 [Homo sapiens]
730394	1842	39.14	159.94	1.88673	1.23459e-16	Up	1.86164e-16	GTF2H2C_2	GO:0005667//transcription factor complex	GO:0003723//RNA binding;GO:0004674//protein serine/threonine kinase activity;GO:0005515//protein binding;GO:0046914//transition metal ion binding;GO:0042623//ATPase activity, coupled;GO:0001071//null	GO:0006353//DNA-templated transcription, termination;GO:0006397//mRNA processing;GO:0045935//positive regulation of nucleobase-containing compound metabolic process;GO:0009416//response to light stimulus;GO:0006354//DNA-templated transcription, elongation;GO:0006289//nucleotide-excision repair;GO:0002029//desensitization of G-protein coupled receptor protein signaling pathway;GO:0006352//DNA-temp…	K03142//transcription initiation factor TFIIH subunit 2	gi|109809737|ref|NP_001035955.1|//general transcription factor IIH subunit 2-like protein [Homo sapiens]
79689	4327	9044.46	36937.8	1.88591	0	Up	0	STEAP4	GO:0031224//intrinsic component of membrane;GO:0043231//intracellular membrane-bounded organelle;GO:0012505//endomembrane system	GO:0046914//transition metal ion binding;GO:0003824//catalytic activity;GO:0050662//coenzyme binding	GO:0000041//transition metal ion transport;GO:0008152//metabolic process;GO:0030154//cell differentiation	K19876//metalloreductase STEAP4 [EC:1.16.1.-]	gi|328887951|ref|NP_001192245.1|//metalloreductase STEAP4 isoform 2 [Homo sapiens];gi|33312465|gb|AAQ04064.1|AF423423_1//six transmembrane prostate protein 2 variant 2 [Homo sapiens]
168537	1242	14	57	1.88145	4.48652e-07	Up	9.37754e-07	GIMAP7	NA	GO:0032561//guanyl ribonucleotide binding	NA	K09174//regulatory factor X 4	gi|23397516|ref|NP_694968.1|//GTPase IMAP family member 7 [Homo sapiens]
113802	1803	73	297	1.88041	3.77801e-29	Up	4.53329e-29	HENMT1	GO:0043232//intracellular non-membrane-bounded organelle	GO:0008168//methyltransferase activity	GO:0006730//one-carbon metabolic process;GO:0009451//RNA modification;GO:0034660//ncRNA metabolic process	NA	gi|156564365|ref|NP_653185.2|//small RNA 2'-O-methyltransferase [Homo sapiens];gi|966919103|ref|XP_015001814.1|//PREDICTED: small RNA 2'-O-methyltransferase isoform X1 [Macaca mulatta]
89832	2858	8.91	36.2	1.87841	4.01581e-05	Up	9.45895e-05	CHRFAM7A	GO:0009986//cell surface;GO:0005887//integral component of plasma membrane	GO:0005231//excitatory extracellular ligand-gated ion channel activity;GO:0042802//identical protein binding;GO:0004888//transmembrane signaling receptor activity;GO:0016247//channel regulator activity;GO:0042165//neurotransmitter binding	GO:0014070//response to organic cyclic compound;GO:0001982//baroreceptor response to decreased systemic arterial blood pressure;GO:0016192//vesicle-mediated transport;GO:0032611//interleukin-1 beta production;GO:0046649//lymphocyte activation;GO:0008283//cell proliferation;GO:0048870//cell motility;GO:0001818//negative regulation of cytokine production;GO:0048243//norepinephrine secretion;GO:0022…	K04809//nicotinic acetylcholine receptor alpha-7	gi|23312388|ref|NP_647536.1|//CHRNA7-FAM7A fusion protein isoform 1 [Homo sapiens]
5373	2340	158	641	1.87631	1.72748e-60	Up	1.4704e-60	PMM2	GO:0044444//cytoplasmic part	GO:0016868//intramolecular transferase activity, phosphotransferases	GO:0009226//nucleotide-sugar biosynthetic process;GO:0006013//mannose metabolic process;GO:0006487//protein N-linked glycosylation	K17497//phosphomannomutase [EC:5.4.2.8]	gi|635030720|ref|XP_007983387.1|//PREDICTED: phosphomannomutase 2 isoform X1 [Chlorocebus sabaeus]
8339	445	19	77	1.87477	6.75718e-09	Up	1.2971e-08	HIST1H2BG	GO:0043231//intracellular membrane-bounded organelle	GO:0003676//nucleic acid binding	GO:0034728//nucleosome organization	K11252//histone H2B	gi|344238174|gb|EGV94277.1|//Histone H2B type 1 [Cricetulus griseus]
5166	3710	82	332	1.8734	3.33239e-32	Up	3.81785e-32	PDK4	GO:0044429//mitochondrial part;GO:0019866//organelle inner membrane	GO:0032559//adenyl ribonucleotide binding;GO:0004673//protein histidine kinase activity	GO:0006468//protein phosphorylation;GO:0006086//acetyl-CoA biosynthetic process from pyruvate;GO:0019318//hexose metabolic process	K00898//pyruvate dehydrogenase kinase 2/3/4 [EC:2.7.11.2]	gi|4505693|ref|NP_002603.1|//pyruvate dehydrogenase kinase, isozyme 4 [Homo sapiens]
84295	3035	25	101	1.87027	4.50318e-11	Up	7.92293e-11	PHF6	GO:0031981//nuclear lumen	GO:0046914//transition metal ion binding	NA	K18494//histone-lysine N-methyltransferase SETDB2 [EC:2.1.1.43];K19998//sec1 family domain-containing protein 1	gi|63478060|ref|NP_115711.2|//PHD finger protein 6 isoform 2 [Homo sapiens];gi|545559414|ref|XP_005641891.1|//PREDICTED: PHD finger protein 6 isoform X2 [Canis lupus familiaris]
100133301	1312	16	64.52	1.86759	1.02893e-07	Up	2.08297e-07	FAM231B	NA	NA	NA	K04605//metabotropic glutamate receptor 2/3	gi|821006462|ref|XP_012366316.1|//PREDICTED: protein FAM231A/C-like [Nomascus leucogenys]
8793	3569	169.38	681.61	1.8646	1.13794e-63	Up	9.40453e-64	TNFRSF10D	GO:0031224//intrinsic component of membrane	GO:0005515//protein binding;GO:0004872//receptor activity	GO:0023052//signaling;GO:0043066//negative regulation of apoptotic process	K04722//tumor necrosis factor receptor superfamily member 10	gi|18203495|sp|Q9UBN6.1|TR10D_HUMAN//RecName: Full=Tumor necrosis factor receptor superfamily member 10D; AltName: Full=Decoy receptor 2; Short=DcR2; AltName: Full=TNF-related apoptosis-inducing ligand receptor 4; Short=TRAIL receptor 4; Short=TRAIL-R4; AltName: Full=TRAIL receptor with a truncated death domain; AltName: CD_antigen=CD264; Flags: Precursor
1378	8721	20897.9	56712.3	1.29621	0	Up	0	CR1	NA	NA	NA	K04011//complement component (3b/4b) receptor 1	gi|86793036|ref|NP_000564.2|//complement receptor type 1 isoform F precursor [Homo sapiens];gi|767908441|ref|XP_011507507.1|//PREDICTED: complement receptor type 1 isoform X1 [Homo sapiens]
54518	2659	9484	38021	1.85914	0	Up	0	APBB1IP	GO:0044444//cytoplasmic part;GO:0005886//plasma membrane	NA	GO:0007599//hemostasis	K17704//amyloid beta A4 precursor protein-binding family B member 1-interacting protein	gi|56118221|ref|NP_061916.3|//amyloid beta A4 precursor protein-binding family B member 1-interacting protein [Homo sapiens]
93081	1322	58	232	1.85591	8.24196e-23	Up	1.09064e-22	TEX30	NA	GO:0003824//catalytic activity	NA	NA	gi|635026547|ref|XP_007959018.1|//PREDICTED: testis-expressed sequence 30 protein isoform X1 [Chlorocebus sabaeus];gi|557947986|ref|NP_001273704.1|//testis-expressed sequence 30 protein isoform 2 [Homo sapiens]
8572	2189	15	60	1.85591	2.98164e-07	Up	6.1835e-07	PDLIM4	NA	GO:0046914//transition metal ion binding	NA	K19867//LIM domain-binding protein 3	gi|16876985|gb|AAH16765.1|//PDZ and LIM domain 4 [Homo sapiens]
7692	2912	10	40	1.85591	2.03611e-05	Up	4.69005e-05	ZNF133	GO:0043231//intracellular membrane-bounded organelle	GO:0046914//transition metal ion binding;GO:0001071//null;GO:0003676//nucleic acid binding	GO:0006351//transcription, DNA-templated	K09228//KRAB domain-containing zinc finger protein	gi|545478783|ref|NP_001269931.1|//zinc finger protein 133 isoform d [Homo sapiens];gi|545479119|ref|NP_001269925.1|//zinc finger protein 133 isoform b [Homo sapiens];gi|545479121|ref|NP_001269936.1|//zinc finger protein 133 isoform h [Homo sapiens];gi|545478558|ref|NP_001269934.1|//zinc finger protein 133 isoform f [Homo sapiens];gi|694978197|ref|XP_009435140.1|//PREDICTED: zinc finger protein 13…
84068	3755	10	40	1.85591	2.03611e-05	Up	4.69005e-05	SLC10A7	GO:0031224//intrinsic component of membrane	GO:0005343//organic acid:sodium symporter activity	GO:0030001//metal ion transport	K14347//solute carrier family 10 (sodium/bile acid cotransporter), member 7	gi|795493063|ref|XP_011708809.1|//PREDICTED: sodium/bile acid cotransporter 7 isoform X2 [Macaca nemestrina];gi|148678913|gb|EDL10860.1|//RIKEN cDNA 2410193C02, isoform CRA_b, partial [Mus musculus];gi|803171164|ref|XP_011952795.1|//PREDICTED: sodium/bile acid cotransporter 7 isoform X6 [Ovis aries];gi|148678912|gb|EDL10859.1|//RIKEN cDNA 2410193C02, isoform CRA_a, partial [Mus musculus]
5414	1679	9	36	1.85591	4.75664e-05	Up	0.000112614	SEPT4	GO:0043231//intracellular membrane-bounded organelle;GO:0043232//intracellular non-membrane-bounded organelle	GO:0032561//guanyl ribonucleotide binding;GO:0017111//nucleoside-triphosphatase activity	GO:0007281//germ cell development;GO:0003006//developmental process involved in reproduction;GO:0007417//central nervous system development;GO:0007005//mitochondrion organization;GO:0009207//purine ribonucleoside triphosphate catabolic process;GO:0006915//apoptotic process	K16943//septin 4	gi|795621134|ref|XP_011731354.1|//PREDICTED: uncharacterized protein LOC105476826 isoform X1 [Macaca nemestrina];gi|119614855|gb|EAW94449.1|//septin 4, isoform CRA_j [Homo sapiens];gi|377652331|ref|NP_001243711.1|//septin-4 isoform 5 [Homo sapiens] ;gi|837818753|ref|XP_012784108.1|//PREDICTED: septin-4 isoform X1 [Ochotona princeps];gi|4758942|ref|NP_004565.1|//septin-4 isoform 1 [Homo sapiens];g…
57447	1978	8	32	1.85591	0.000112027	Up	0.000271773	NDRG2	GO:0031981//nuclear lumen;GO:0005815//microtubule organizing center	NA	GO:0023052//signaling;GO:0048731//system development;GO:0048869//cellular developmental process	K18266//protein NDRG1	gi|532524996|ref|NP_001269141.1|//protein NDRG2 isoform d [Homo sapiens] ;gi|42544211|ref|NP_963293.1|//protein NDRG2 isoform a [Homo sapiens];gi|532524992|ref|NP_001269140.1|//protein NDRG2 isoform c [Homo sapiens] ;gi|532525000|ref|NP_001269144.1|//protein NDRG2 isoform e [Homo sapiens]
84864	4872	6.73	26.87	1.85323	0.000341448	Up	0.000859237	MINA	GO:0031981//nuclear lumen	NA	GO:0022613//ribonucleoprotein complex biogenesis	K16914//bifunctional lysine-specific demethylase and histidyl-hydroxylase NO66 [EC:1.14.11.- 1.14.11.27]	gi|795574298|ref|XP_011910776.1|//PREDICTED: bifunctional lysine-specific demethylase and histidyl-hydroxylase MINA isoform X1 [Cercocebus atys];gi|795574303|ref|XP_011910777.1|//PREDICTED: bifunctional lysine-specific demethylase and histidyl-hydroxylase MINA isoform X2 [Cercocebus atys]
53918	2941	184	734.26	1.8525	7.42669e-68	Up	5.98754e-68	PELO	GO:0043231//intracellular membrane-bounded organelle	GO:0043169//cation binding;GO:0004518//nuclease activity	GO:0010467//gene expression;GO:0006996//organelle organization	K06965//protein pelota	gi|31880783|ref|NP_057030.3|//protein pelota homolog [Homo sapiens]
29071	1743	191	758	1.84454	1.37837e-69	Up	1.09268e-69	C1GALT1C1	GO:0031224//intrinsic component of membrane	NA	NA	K09653//C1GALT1-specific chaperone 1 [EC:2.4.1.-]	gi|23097329|ref|NP_689905.1|//C1GALT1-specific chaperone 1 [Homo sapiens]
9881	10499	6556	25999	1.84348	0	Up	0	TRANK1	NA	GO:0032559//adenyl ribonucleotide binding;GO:0003678//DNA helicase activity;GO:0003676//nucleic acid binding	GO:0006259//DNA metabolic process	K11807//WD and tetratricopeptide repeats protein 1;K09553//stress-induced-phosphoprotein 1	gi|966928219|ref|XP_002808376.2|//PREDICTED: TPR and ankyrin repeat-containing protein 1 [Macaca mulatta];gi|257467636|ref|NP_055646.2|//TPR and ankyrin repeat-containing protein 1 [Homo sapiens]
3013	510	6.99	27.7	1.84244	0.000299214	Up	0.000749931	HIST1H2AD	GO:0043231//intracellular membrane-bounded organelle;GO:0000785//chromatin	GO:0003676//nucleic acid binding	GO:0034728//nucleosome organization	K11251//histone H2A	gi|927153979|ref|XP_013832966.1|//PREDICTED: histone H2A type 1-like isoform X2 [Sus scrofa]
6654	8331	450	1782	1.84141	1.45077e-160	Up	7.52173e-161	SOS1	GO:0044444//cytoplasmic part	GO:0005088//Ras guanyl-nucleotide exchange factor activity;GO:0003676//nucleic acid binding	GO:0007266//Rho protein signal transduction;GO:0007169//transmembrane receptor protein tyrosine kinase signaling pathway;GO:0002376//immune system process;GO:0009966//regulation of signal transduction;GO:0006935//chemotaxis;GO:0007599//hemostasis	K03099//son of sevenless	gi|119620755|gb|EAX00350.1|//son of sevenless homolog 1 (Drosophila), isoform CRA_a [Homo sapiens]
283537	3101	177	699	1.83746	5.37045e-64	Up	4.42484e-64	SLC46A3	GO:0031224//intrinsic component of membrane	NA	GO:0006810//transport	K14613//MFS transporter, PCFT/HCP family, solute carrier family 46 (folate transporter), member 1	gi|32401447|ref|NP_861450.1|//solute carrier family 46 member 3 isoform a precursor [Homo sapiens];gi|209571533|ref|NP_001129391.1|//solute carrier family 46 member 3 isoform b precursor [Homo sapiens]
389	1340	117	462	1.8373	5.87577e-43	Up	5.89461e-43	RHOC	GO:0043231//intracellular membrane-bounded organelle;GO:0031090//organelle membrane;GO:0044444//cytoplasmic part;GO:0043005//neuron projection	GO:0005515//protein binding;GO:0060089//molecular transducer activity;GO:0032561//guanyl ribonucleotide binding;GO:0017111//nucleoside-triphosphatase activity	GO:0007041//lysosomal transport;GO:0016477//cell migration;GO:0001101//response to acid chemical;GO:0019229//regulation of vasoconstriction;GO:0009746//response to hexose;GO:0006950//response to stress;GO:0016049//cell growth;GO:0043065//positive regulation of apoptotic process;GO:0030832//regulation of actin filament length;GO:0006935//chemotaxis;GO:0030041//actin filament polymerization;GO:0030…	K07857//Ras homolog gene family, member C	gi|119576944|gb|EAW56540.1|//hCG2043377 [Homo sapiens];gi|795262762|ref|XP_011856131.1|//PREDICTED: rho-related GTP-binding protein RhoC isoform X1 [Mandrillus leucophaeus];gi|119576941|gb|EAW56537.1|//hCG2043376, isoform CRA_c [Homo sapiens]
30008	2096	153	604	1.83693	1.52353e-55	Up	1.34389e-55	EFEMP2	GO:0044464//cell part;GO:0005578//proteinaceous extracellular matrix	GO:0046872//metal ion binding;GO:0004872//receptor activity;GO:0005198//structural molecule activity	GO:0007599//hemostasis	K19866//EGF-containing fibulin-like extracellular matrix protein 2	gi|795556420|ref|XP_011719178.1|//PREDICTED: EGF-containing fibulin-like extracellular matrix protein 2 [Macaca nemestrina]
84034	4009	877	3461	1.83645	0	Up	0	EMILIN2	GO:0031012//extracellular matrix	GO:0005201//extracellular matrix structural constituent;GO:0005488//binding	GO:0009987//cellular process	K10352//myosin heavy chain;K12478//early endosome antigen 1	gi|60498978|ref|NP_114437.2|//EMILIN-2 precursor [Homo sapiens]
5987	2969	696	2734	1.82977	3.48906e-243	Up	1.42853e-243	TRIM27	GO:0005635//nuclear envelope;GO:0016604//nuclear body;GO:0016021//integral component of membrane	GO:0004713//protein tyrosine kinase activity;GO:0046914//transition metal ion binding;GO:0003676//nucleic acid binding	GO:0006357//regulation of transcription from RNA polymerase II promoter;GO:0048232//male gamete generation;GO:0010629//negative regulation of gene expression;GO:0051259//protein oligomerization	K12009//tripartite motif-containing protein 27 [EC:2.3.2.27]	gi|440898050|gb|ELR49627.1|//Zinc finger protein RFP, partial [Bos mutus]
23002	5896	12	47	1.82554	5.77409e-06	Up	1.28249e-05	DAAM1	GO:0016020//membrane;GO:0044424//intracellular part	GO:0008092//cytoskeletal protein binding;GO:0017016//Ras GTPase binding	GO:0007010//cytoskeleton organization	K04512//dishevelled associated activator of morphogenesis	gi|946781132|ref|XP_014401444.1|//PREDICTED: disheveled-associated activator of morphogenesis 1 [Myotis brandtii]
120425	1935	15500	60678	1.82482	0	Up	0	JAML	GO:0031224//intrinsic component of membrane;GO:0044459//plasma membrane part	NA	GO:0002682//regulation of immune system process;GO:0009987//cellular process;GO:0007599//hemostasis	K16352//sialic acid binding Ig-like lectin 15;K06770//myelin protein zero;K04846//voltage-gated sodium channel type II beta	gi|694947290|ref|XP_009422525.1|//PREDICTED: junctional adhesion molecule-like isoform X1 [Pan troglodytes];gi|148664207|ref|NP_001091996.1|//junctional adhesion molecule-like isoform 1 precursor [Homo sapiens];gi|148664224|ref|NP_694938.2|//junctional adhesion molecule-like isoform 2 [Homo sapiens];gi|685589840|ref|XP_009185648.1|//PREDICTED: junctional adhesion molecule-like isoform X1 [Papio a…
6403	3185	69	270	1.82421	1.1312e-25	Up	1.43141e-25	SELP	GO:0044421//extracellular region part;GO:0030667//secretory granule membrane;GO:0009986//cell surface;GO:0016021//integral component of membrane	GO:0005515//protein binding;GO:0048029//monosaccharide binding;GO:0005539//glycosaminoglycan binding;GO:0046625//sphingolipid binding	GO:0009653//anatomical structure morphogenesis;GO:0007159//leukocyte cell-cell adhesion;GO:0042742//defense response to bacterium;GO:0002237//response to molecule of bacterial origin;GO:0002684//positive regulation of immune system process;GO:0010543//regulation of platelet activation;GO:0002685//regulation of leukocyte migration;GO:0030155//regulation of cell adhesion;GO:0006887//exocytosis	K06496//selectin, platele	gi|157419154|ref|NP_002996.2|//P-selectin precursor [Homo sapiens]
474344	3567	45	176	1.82349	2.20679e-17	Up	3.26747e-17	GIMAP6	NA	GO:0032561//guanyl ribonucleotide binding	NA	NA	gi|119574487|gb|EAW54102.1|//GTPase, IMAP family member 6, isoform CRA_b [Homo sapiens];gi|346421477|ref|NP_001231001.1|//GTPase IMAP family member 6 isoform 2 [Homo sapiens] ;gi|56119214|ref|NP_078987.3|//GTPase IMAP family member 6 isoform 1 [Homo sapiens]
1522	1517	4965	11152	1.02335	0	Up	0	CTSZ	GO:0044421//extracellular region part;GO:0000323//lytic vacuole	GO:0004175//endopeptidase activity	GO:0019538//protein metabolic process	K08568//cathepsin X [EC:3.4.18.1]	gi|22538442|ref|NP_001327.2|//cathepsin Z preproprotein [Homo sapiens]
2150	2928	1274.31	4975.45	1.82102	0	Up	0	F2RL1	GO:0043231//intracellular membrane-bounded organelle;GO:0016021//integral component of membrane	GO:0008528//G-protein coupled peptide receptor activity;GO:0005515//protein binding	GO:0007596//blood coagulation;GO:0050921//positive regulation of chemotaxis;GO:0007166//cell surface receptor signaling pathway;GO:0002687//positive regulation of leukocyte migration;GO:0051480//regulation of cytosolic calcium ion concentration	K04234//coagulation factor II (thrombin) receptor-like 1	gi|34577052|ref|NP_005233.3|//proteinase-activated receptor 2 precursor [Homo sapiens]
388969	4283	810.62	3160	1.81874	1.81623e-278	Up	6.81867e-279	C2orf68	NA	NA	NA	K09228//KRAB domain-containing zinc finger protein;K12581//CCR4-NOT transcription complex subunit 7/8;K12900//FUS-interacting serine-arginine-rich protein 1	gi|89191830|ref|NP_001013671.2|//UPF0561 protein C2orf68 [Homo sapiens]
51299	1574	19	74	1.81744	2.44793e-08	Up	4.81389e-08	NRN1	GO:0031224//intrinsic component of membrane	NA	GO:0048731//system development	K05726//breast cancer anti-estrogen resistance 1	gi|525314175|ref|NP_001265640.1|//neuritin isoform 2 [Homo sapiens];gi|149045195|gb|EDL98281.1|//neuritin [Rattus norvegicus]
54097	1240	18	70	1.81527	5.66337e-08	Up	1.13201e-07	FAM3B	GO:0044421//extracellular region part	GO:0005102//receptor binding	GO:0030072//peptide hormone secretion;GO:0012501//programmed cell death	K07747//beta-site APP-cleaving enzyme 2 (memapsin 1) [EC:3.4.23.45];K09666//beta-1,2-N-acetylglucosaminyltransferase [EC:2.4.1.-]	gi|724955464|ref|XP_010352819.1|//PREDICTED: protein FAM3B isoform X4 [Rhinopithecus roxellana];gi|685528824|ref|XP_009200492.1|//PREDICTED: beta-secretase 2 isoform X6 [Papio anubis]
387837	1595	314	1220	1.81396	2.3938e-108	Up	1.53439e-108	CLEC12B	GO:0031224//intrinsic component of membrane	GO:0030246//carbohydrate binding;GO:0004871//signal transducer activity	NA	K17517//C-type lectin domain family 12 member B	gi|194018499|ref|NP_995324.2|//C-type lectin domain family 12 member B isoform 2 [Homo sapiens] ;gi|194018501|ref|NP_001123470.1|//C-type lectin domain family 12 member B isoform 1 [Homo sapiens]
1848	3379	7973	30925	1.81149	0	Up	0	DUSP6	GO:0031981//nuclear lumen;GO:0044444//cytoplasmic part	GO:0008138//protein tyrosine/serine/threonine phosphatase activity	GO:0046620//regulation of organ growth;GO:0001714//endodermal cell fate specification;GO:0003002//regionalization;GO:0002224//toll-like receptor signaling pathway;GO:0006915//apoptotic process;GO:0043409//negative regulation of MAPK cascade;GO:0001932//regulation of protein phosphorylation;GO:0010033//response to organic substance;GO:0006470//protein dephosphorylation;GO:0008543//fibroblast growt…	K04459//dual specificity MAP kinase phosphatase [EC:3.1.3.16 3.1.3.48]	gi|42764687|ref|NP_073143.2|//dual specificity protein phosphatase 6 isoform b [Homo sapiens];gi|42764683|ref|NP_001937.2|//dual specificity protein phosphatase 6 isoform a [Homo sapiens]
29909	1862	8	31	1.81011	0.000173348	Up	0.000426868	GPR171	GO:0031224//intrinsic component of membrane	GO:0001608//G-protein coupled nucleotide receptor activity	GO:0007166//cell surface receptor signaling pathway	K08441//G protein-coupled receptor 171	gi|153792776|ref|NP_037440.3|//probable G-protein coupled receptor 171 [Homo sapiens]
64764	6871	253.71	982.74	1.80954	2.24927e-87	Up	1.60672e-87	CREB3L2	GO:0043231//intracellular membrane-bounded organelle;GO:0031224//intrinsic component of membrane;GO:0031090//organelle membrane	GO:0005515//protein binding;GO:0001071//null	GO:0048193//Golgi vesicle transport;GO:0033554//cellular response to stress;GO:0030154//cell differentiation;GO:0009888//tissue development;GO:0006351//transcription, DNA-templated	K09048//cyclic AMP-responsive element-binding protein 3	gi|359339005|ref|NP_001240704.1|//cyclic AMP-responsive element-binding protein 3-like protein 2 isoform 2 [Homo sapiens];gi|56550067|ref|NP_919047.2|//cyclic AMP-responsive element-binding protein 3-like protein 2 isoform 1 [Homo sapiens]
84456	4354	118	457	1.80932	1.13687e-41	Up	1.15681e-41	L3MBTL3	GO:0043231//intracellular membrane-bounded organelle	NA	GO:0006325//chromatin organization	K11461//polycomb protein SCMH1	gi|55770870|ref|NP_115814.1|//lethal(3)malignant brain tumor-like protein 3 isoform a [Homo sapiens];gi|55770872|ref|NP_001007103.1|//lethal(3)malignant brain tumor-like protein 3 isoform b [Homo sapiens]
2210	1706	1632.95	6322.4	1.80891	0	Up	0	FCGR1B	GO:0031224//intrinsic component of membrane	GO:0004888//transmembrane signaling receptor activity;GO:0019865//immunoglobulin binding;GO:0004871//signal transducer activity	GO:0002376//immune system process;GO:0006952//defense response;GO:0019221//cytokine-mediated signaling pathway;GO:0006909//phagocytosis	K06498//high affinity immunoglobulin gamma Fc receptor I	gi|219804014|ref|NP_001004340.2|//high affinity immunoglobulin gamma Fc receptor IB isoform 2 precursor [Homo sapiens];gi|63055063|ref|NP_001017986.1|//high affinity immunoglobulin gamma Fc receptor IB isoform 1 precursor [Homo sapiens];gi|180162|gb|AAA58414.1|//Fc gamma receptor type I [Homo sapiens]
90134	4242	62	240	1.80861	8.79109e-23	Up	1.16405e-22	KCNH7	GO:0031224//intrinsic component of membrane	GO:0005249//voltage-gated potassium channel activity;GO:0060089//molecular transducer activity;GO:0005488//binding	GO:0006351//transcription, DNA-templated;GO:0030001//metal ion transport;GO:0048511//rhythmic process;GO:0051259//protein oligomerization	K04910//potassium voltage-gated channel Eag-related subfamily H member 7	gi|27886653|ref|NP_150375.2|//potassium voltage-gated channel subfamily H member 7 isoform 1 [Homo sapiens];gi|27886665|ref|NP_775185.1|//potassium voltage-gated channel subfamily H member 7 isoform 2 [Homo sapiens]
7535	2083	146	565	1.8082	5.16865e-51	Up	4.74659e-51	ZAP70	GO:0016020//membrane;GO:0044444//cytoplasmic part;GO:0043235//receptor complex	GO:0004713//protein tyrosine kinase activity;GO:0032559//adenyl ribonucleotide binding	GO:0006464//cellular protein modification process;GO:0045580//regulation of T cell differentiation;GO:0035556//intracellular signal transduction;GO:0043368//positive T cell selection;GO:0050851//antigen receptor-mediated signaling pathway	K07360//tyrosine-protein kinase ZAP-70 [EC:2.7.10.2]	gi|119622324|gb|EAX01919.1|//zeta-chain (TCR) associated protein kinase 70kDa, isoform CRA_b [Homo sapiens];gi|24657846|gb|AAH39039.1|//ZAP70 protein [Homo sapiens]
84969	2428	46	178	1.80809	2.23286e-17	Up	3.3067e-17	TOX2	NA	NA	NA	K18808//toll-like receptor 13	gi|578836221|ref|XP_006723947.1|//PREDICTED: TOX high mobility group box family member 2 isoform X1 [Homo sapiens];gi|149408146|ref|NP_001092268.1|//TOX high mobility group box family member 2 isoform b [Homo sapiens];gi|149408144|ref|NP_001092267.1|//TOX high mobility group box family member 2 isoform a [Homo sapiens]
245973	3112	7.54	29.15	1.80677	0.000258709	Up	0.000645284	ATP6V1C2	GO:0033176//proton-transporting V-type ATPase complex;GO:0044444//cytoplasmic part	GO:0015662//ATPase activity, coupled to transmembrane movement of ions, phosphorylative mechanism	GO:0015988//energy coupled proton transmembrane transport, against electrochemical gradient;GO:0007169//transmembrane receptor protein tyrosine kinase signaling pathway;GO:0006875//cellular metal ion homeostasis;GO:0015031//protein transport	K02148//V-type H+-transporting ATPase subunit C	gi|47717098|ref|NP_653184.2|//V-type proton ATPase subunit C 2 isoform b [Homo sapiens];gi|87159812|ref|NP_001034451.1|//V-type proton ATPase subunit C 2 isoform a [Homo sapiens]
27439	4636	588	2273	1.80662	4.74513e-199	Up	2.19083e-199	CECR6	NA	NA	NA	NA	gi|768022773|ref|XP_011544427.1|//PREDICTED: cat eye syndrome critical region protein 6 isoform X2 [Homo sapiens];gi|13994236|ref|NP_114096.1|//cat eye syndrome critical region protein 6 isoform a [Homo sapiens]
131870	3120	952	3677	1.80541	0	Up	0	NUDT16	GO:0031981//nuclear lumen	GO:0043169//cation binding;GO:0003824//catalytic activity;GO:0005488//binding;GO:0003676//nucleic acid binding	NA	K16855//U8 snoRNA-decapping enzyme [EC:3.6.1.62 3.6.1.64]	gi|285026437|ref|NP_001165376.1|//U8 snoRNA-decapping enzyme isoform 3 [Homo sapiens];gi|16306954|gb|AAH09546.1|//NUDT16 protein, partial [Homo sapiens];gi|285026441|ref|NP_001165377.1|//U8 snoRNA-decapping enzyme isoform 1 [Homo sapiens]
29902	1529	31.59	122	1.80526	1.81312e-12	Up	3.04022e-12	FAM216A	NA	NA	NA	K06883//uncharacterized protein	gi|156231347|ref|NP_037432.2|//protein FAM216A [Homo sapiens]
5567	4520	36	139	1.80493	6.00945e-14	Up	9.6865e-14	PRKACB	GO:0016020//membrane;GO:0031981//nuclear lumen;GO:0043234//protein complex;GO:0045202//synapse;GO:0044444//cytoplasmic part	GO:0046872//metal ion binding;GO:0032559//adenyl ribonucleotide binding;GO:0019900//kinase binding;GO:0004690//cyclic nucleotide-dependent protein kinase activity	GO:0051969//regulation of transmission of nerve impulse;GO:0006006//glucose metabolic process;GO:0006641//triglyceride metabolic process;GO:0032147//activation of protein kinase activity;GO:0001704//formation of primary germ layer;GO:0032870//cellular response to hormone stimulus;GO:0030073//insulin secretion;GO:0010863//positive regulation of phospholipase C activity;GO:0015980//energy derivatio…	K04345//protein kinase A [EC:2.7.11.11]	gi|197100271|ref|NP_001127665.1|//cAMP-dependent protein kinase catalytic subunit beta isoform 2 [Pongo abelii] ;gi|62087958|dbj|BAD92426.1|//cAMP-dependent protein kinase catalytic subunit beta isoform 2 variant [Homo sapiens];gi|665506018|ref|NP_001287846.1|//cAMP-dependent protein kinase catalytic subunit beta isoform 12 [Homo sapiens] ;gi|338827761|ref|NP_001229790.1|//cAMP-dependent protein …
54583	7102	4910.29	18949.6	1.8042	0	Up	0	EGLN1	GO:0044444//cytoplasmic part	GO:0016706//oxidoreductase activity, acting on paired donors, with incorporation or reduction of molecular oxygen, 2-oxoglutarate as one donor, and incorporation of one atom each of oxygen into both donors;GO:0046914//transition metal ion binding	GO:0033483//gas homeostasis;GO:0008152//metabolic process;GO:0043392//negative regulation of DNA binding;GO:0006950//response to stress	K09592//hypoxia-inducible factor prolyl hydroxylase [EC:1.14.11.29]	gi|13489073|ref|NP_071334.1|//egl nine homolog 1 [Homo sapiens]
286	7754	7	27	1.80345	0.00041058	Up	0.00104013	ANK1	GO:0005856//cytoskeleton;GO:0005783//endoplasmic reticulum;GO:0044459//plasma membrane part;GO:0030016//myofibril	GO:0030674//protein binding, bridging;GO:0008092//cytoskeletal protein binding;GO:0005198//structural molecule activity	GO:0035090//maintenance of apical/basal cell polarity;GO:0023052//signaling;GO:0006935//chemotaxis;GO:0006996//organelle organization;GO:0016192//vesicle-mediated transport	K10380//ankyrin	gi|70780355|ref|NP_065210.2|//ankyrin-1 isoform 2 [Homo sapiens];gi|70780353|ref|NP_065208.2|//ankyrin-1 isoform 4 [Homo sapiens];gi|70780357|ref|NP_000028.3|//ankyrin-1 isoform 3 [Homo sapiens];gi|70780359|ref|NP_065209.2|//ankyrin-1 isoform 1 [Homo sapiens];gi|215598566|ref|NP_001135917.1|//ankyrin-1 isoform 10 precursor [Homo sapiens];gi|70780361|ref|NP_065213.2|//ankyrin-1 isoform 7 precursor…
55139	2484	467.3	1798.56	1.80034	3.59276e-157	Up	1.88493e-157	ANKZF1	GO:0044464//cell part	GO:0046914//transition metal ion binding	NA	K14816//pre-60S factor REI1	gi|530370571|ref|XP_005246720.1|//PREDICTED: ankyrin repeat and zinc finger domain-containing protein 1 isoform X2 [Homo sapiens];gi|109150425|ref|NP_060559.2|//ankyrin repeat and zinc finger domain-containing protein 1 isoform 1 [Homo sapiens]
7994	9141	9789.53	37668.6	1.79997	0	Up	0	KAT6A	GO:0070775//H3 histone acetyltransferase complex;GO:0000785//chromatin	GO:0005515//protein binding;GO:0046914//transition metal ion binding;GO:0003712//transcription cofactor activity;GO:0004468//lysine N-acetyltransferase activity, acting on acetyl phosphate as donor;GO:0003676//nucleic acid binding	GO:0034728//nucleosome organization;GO:0019827//stem cell population maintenance;GO:0016573//histone acetylation;GO:0030097//hemopoiesis;GO:0071103//DNA conformation change	K11305//histone acetyltransferase MYST3 [EC:2.3.1.48]	gi|148745647|gb|AAI42660.1|//MYST3 protein, partial [Homo sapiens];gi|150378493|ref|NP_006757.2|//histone acetyltransferase KAT6A isoform 1 [Homo sapiens]
51058	1749	12	46	1.79451	8.86331e-06	Up	1.9908e-05	ZNF691	GO:0043231//intracellular membrane-bounded organelle	GO:0046914//transition metal ion binding;GO:0003676//nucleic acid binding	NA	K09230//SCAN domain-containing zinc finger protein	gi|337298801|ref|NP_001229668.1|//zinc finger protein 691 isoform 1 [Homo sapiens];gi|767904529|ref|XP_011539839.1|//PREDICTED: zinc finger protein 691 isoform X3 [Homo sapiens]
9465	2943	6	23	1.79451	0.000973461	Up	0.00255745	AKAP7	GO:0044459//plasma membrane part;GO:0044444//cytoplasmic part	GO:0005515//protein binding	GO:0006810//transport;GO:0044260//cellular macromolecule metabolic process;GO:0007165//signal transduction;GO:0033036//macromolecule localization	K16524//A-kinase anchor protein 7	gi|330864783|ref|NP_057461.2|//A-kinase anchor protein 7 isoform gamma isoform gamma [Homo sapiens];gi|927094210|ref|XP_013847998.1|//PREDICTED: A-kinase anchor protein 7 isoform gamma, partial [Sus scrofa]
9858	4959	6	23	1.79451	0.000973461	Up	0.00255745	PPP1R26	GO:0031981//nuclear lumen	GO:0005488//binding	NA	K17565//protein phosphatase 1 regulatory subunit 26	gi|929654070|dbj|BAA31624.3|//KIAA0649 protein [Homo sapiens]
2213	2144	1446.48	3355.08	1.06971	1.21856e-133	Up	6.98553e-134	FCGR2B	GO:0031224//intrinsic component of membrane	GO:0019865//immunoglobulin binding;GO:0004871//signal transducer activity	GO:0002682//regulation of immune system process;GO:0023052//signaling;GO:0051704//multi-organism process	K12560//low affinity immunoglobulin gamma Fc receptor II-b	gi|299890847|ref|NP_001177757.1|//low affinity immunoglobulin gamma Fc region receptor II-b isoform 5 [Homo sapiens];gi|4099471|gb|AAD00640.1|//Fc-gamma-RIIb1, partial [Homo sapiens] ;gi|4099469|gb|AAD00639.1|//Fc-gamma-RIIb1, partial [Homo sapiens];gi|50511932|ref|NP_001002273.1|//low affinity immunoglobulin gamma Fc region receptor II-b isoform 2 precursor [Homo sapiens];gi|4099473|gb|AAD00641.…
340527	3678	1716	6563	1.79122	0	Up	0	NHSL2	NA	NA	NA	K07187//insulin receptor substrate 2	gi|254692833|ref|NP_001013649.2|//NHS-like protein 2 [Homo sapiens]
57325	3714	6.9	26.38	1.79069	0.000492769	Up	0.00125637	KAT14	GO:0000123//histone acetyltransferase complex	GO:0019904//protein domain specific binding;GO:0016407//acetyltransferase activity	GO:0007275//multicellular organism development;GO:0016573//histone acetylation;GO:0007049//cell cycle	K18188//protein PET117;K16774//IQ calmodulin-binding motif-containing protein 1;K11486//polycomb-like protein 3	gi|821011892|ref|XP_004092955.2|//PREDICTED: LOW QUALITY PROTEIN: cysteine-rich protein 2-binding protein [Nomascus leucogenys]
145447	1493	127.46	487.21	1.79041	1.09113e-43	Up	1.08512e-43	ABHD12B	NA	GO:0003824//catalytic activity	NA	K13705//abhydrolase domain-containing protein 12B	gi|694956120|ref|XP_003314369.2|//PREDICTED: abhydrolase domain-containing protein 12B isoform X1 [Pan troglodytes];gi|331284221|ref|NP_001193602.1|//protein ABHD12B isoform a [Homo sapiens];gi|32528310|ref|NP_861535.1|//protein ABHD12B isoform c [Homo sapiens]
112476	3188	22	84	1.7888	4.62709e-09	Up	8.81967e-09	PRRT2	GO:0031224//intrinsic component of membrane	NA	GO:0050896//response to stimulus	NA	gi|820975864|ref|XP_012360791.1|//PREDICTED: proline-rich transmembrane protein 2 isoform X1 [Nomascus leucogenys];gi|15030270|gb|AAH11405.1|//Proline-rich transmembrane protein 2 [Homo sapiens]
53347	2225	11	42	1.7888	2.0635e-05	Up	4.75664e-05	UBASH3A	GO:0043231//intracellular membrane-bounded organelle;GO:0044444//cytoplasmic part	NA	GO:0050856//regulation of T cell receptor signaling pathway;GO:0001816//cytokine production	K18993//ubiquitin-associated and SH3 domain-containing protein [EC:3.1.3.48]	gi|635023728|ref|XP_007967329.1|//PREDICTED: ubiquitin-associated and SH3 domain-containing protein A isoform X4 [Chlorocebus sabaeus];gi|694981116|ref|XP_001136128.2|//PREDICTED: ubiquitin-associated and SH3 domain-containing protein A isoform X4 [Pan troglodytes];gi|635023724|ref|XP_007967316.1|//PREDICTED: ubiquitin-associated and SH3 domain-containing protein A isoform X2 [Chlorocebus sabaeus]
389203	1021	38	145	1.7879	2.63417e-14	Up	4.20155e-14	SMIM20	NA	NA	NA	NA	gi|172046141|sp|Q8N5G0.2|SMI20_HUMAN//RecName: Full=Small integral membrane protein 20
9021	2737	14865	56644	1.78592	0	Up	0	SOCS3	GO:0044444//cytoplasmic part	GO:0019887//protein kinase regulator activity;GO:0005488//binding	GO:0010212//response to ionizing radiation;GO:0006950//response to stress;GO:0006468//protein phosphorylation;GO:0043434//response to peptide hormone;GO:0009968//negative regulation of signal transduction;GO:0043066//negative regulation of apoptotic process;GO:0001568//blood vessel development;GO:0002237//response to molecule of bacterial origin;GO:0043627//response to estrogen;GO:0001959//regula…	K04696//suppressor of cytokine signaling 3	gi|724914976|ref|XP_010380220.1|//PREDICTED: suppressor of cytokine signaling 3 [Rhinopithecus roxellana]
81618	1974	26	99	1.78483	2.50167e-10	Up	4.52026e-10	ITM2C	GO:0031224//intrinsic component of membrane;GO:0005764//lysosome	GO:0005515//protein binding;GO:0032559//adenyl ribonucleotide binding	GO:0010975//regulation of neuron projection development;GO:0043068//positive regulation of programmed cell death	K18265//integral membrane protein 2C	gi|297265084|ref|XP_001112946.2|//PREDICTED: integral membrane protein 2C [Macaca mulatta];gi|60302914|ref|NP_001012534.1|//integral membrane protein 2C isoform 2 [Homo sapiens];gi|640812889|ref|XP_008063122.1|//PREDICTED: LOW QUALITY PROTEIN: integral membrane protein 2C [Tarsius syrichta]
84817	2075	76.46	291.07	1.7845	9.17019e-27	Up	1.14003e-26	TXNDC17	GO:0044444//cytoplasmic part	GO:0016209//antioxidant activity;GO:0016668//oxidoreductase activity, acting on a sulfur group of donors, NAD(P) as acceptor;GO:0005488//binding	GO:0019221//cytokine-mediated signaling pathway	K00685//arginine-tRNA-protein transferase [EC:2.3.2.8];K00771//protein xylosyltransferase [EC:2.4.2.26]	gi|635087281|ref|XP_008008233.1|//PREDICTED: thioredoxin domain-containing protein 17 [Chlorocebus sabaeus]
27440	1734	51	194	1.7834	1.86736e-18	Up	2.7056e-18	CECR5	GO:0043231//intracellular membrane-bounded organelle	GO:0003824//catalytic activity	NA	NA	gi|21914862|ref|NP_060299.4|//cat eye syndrome critical region protein 5 isoform 1 [Homo sapiens];gi|14861834|ref|NP_149061.1|//cat eye syndrome critical region protein 5 isoform 2 precursor [Homo sapiens]
6606	1627	198.47	754.96	1.78339	2.84084e-66	Up	2.3071e-66	SMN1	GO:0031981//nuclear lumen;GO:0016604//nuclear body;GO:0044444//cytoplasmic part	GO:0005488//binding	GO:0000398//mRNA splicing, via spliceosome	K13129//survival motor neuron protein	gi|13259512|ref|NP_075012.1|//survival motor neuron protein isoform b [Homo sapiens];gi|13259527|ref|NP_075013.1|//survival motor neuron protein isoform a [Homo sapiens];gi|4507091|ref|NP_000335.1|//survival motor neuron protein isoform d [Homo sapiens]
4736	719	195	741	1.78191	5.19948e-65	Up	4.25329e-65	RPL10A	GO:0043231//intracellular membrane-bounded organelle;GO:0015934//large ribosomal subunit	GO:0005198//structural molecule activity;GO:0003676//nucleic acid binding	GO:0031016//pancreas development;GO:0019080//viral gene expression;GO:0006412//translation	K02865//large subunit ribosomal protein L10Ae	gi|531171|gb|AAA86463.1|//Csa-19 [Homo sapiens]
860	5318	1261.2	4789.63	1.78103	0	Up	0	RUNX2	NA	NA	NA	K09278//runt-related transcription factor 2	gi|795388333|ref|XP_011752665.1|//PREDICTED: runt-related transcription factor 2 isoform X2 [Macaca nemestrina];gi|927224851|ref|XP_013847465.1|//PREDICTED: runt-related transcription factor 2-like [Sus scrofa];gi|795388337|ref|XP_011752666.1|//PREDICTED: runt-related transcription factor 2 isoform X3 [Macaca nemestrina];gi|511093989|ref|NP_001265407.1|//runt-related transcription factor 2 isofor…
1027	2535	3649	13832	1.77835	0	Up	0	CDKN1B	GO:0031981//nuclear lumen;GO:0044444//cytoplasmic part	GO:0005057//signal transducer activity, downstream of receptor;GO:0019902//phosphatase binding;GO:0016538//cyclin-dependent protein serine/threonine kinase regulator activity	GO:0014070//response to organic cyclic compound;GO:0051320//S phase;GO:0010226//response to lithium ion;GO:0007050//cell cycle arrest;GO:0030001//metal ion transport;GO:0016049//cell growth;GO:0046677//response to antibiotic;GO:0007169//transmembrane receptor protein tyrosine kinase signaling pathway;GO:0051318//G1 phase;GO:0048017//inositol lipid-mediated signaling;GO:0012502//induction of progr…	K06624//cyclin-dependent kinase inhibitor 1B	gi|4757962|ref|NP_004055.1|//cyclin-dependent kinase inhibitor 1B [Homo sapiens]
10172	2228	10.03	38	1.77759	4.94242e-05	Up	0.000117165	ZNF256	GO:0043231//intracellular membrane-bounded organelle	GO:0046914//transition metal ion binding;GO:0001071//null;GO:0003676//nucleic acid binding	GO:0032501//multicellular organismal process;GO:0006351//transcription, DNA-templated	K09228//KRAB domain-containing zinc finger protein	gi|37574603|ref|NP_005764.2|//zinc finger protein 256 [Homo sapiens]
1635	2019	14	53	1.77648	2.50034e-06	Up	5.43689e-06	DCTD	GO:0044444//cytoplasmic part	GO:0016814//hydrolase activity, acting on carbon-nitrogen (but not peptide) bonds, in cyclic amidines;GO:0046914//transition metal ion binding	GO:0009112//nucleobase metabolic process;GO:0006213//pyrimidine nucleoside metabolic process;GO:0009117//nucleotide metabolic process	K01493//dCMP deaminase [EC:3.5.4.12]	gi|55623552|ref|XP_517546.1|//PREDICTED: deoxycytidylate deaminase isoform X1 [Pan troglodytes];gi|61742821|ref|NP_001012750.1|//deoxycytidylate deaminase isoform a [Homo sapiens]
57719	4162	14.01	53	1.77545	2.52048e-06	Up	5.48422e-06	ANO8	GO:0016021//integral component of membrane	GO:0005216//ion channel activity	NA	K19502//anoctamin-8	gi|931605282|ref|XP_014198039.1|//PREDICTED: LOW QUALITY PROTEIN: anoctamin-8 [Pan paniscus]
8857	16407	23	87	1.7753	3.05397e-09	Up	5.77223e-09	FCGBP	NA	GO:0005488//binding	NA	K18273//alpha-tectorin	gi|154146262|ref|NP_003881.2|//IgGFc-binding protein precursor [Homo sapiens]
83463	2102	1367.25	5166.19	1.77374	0	Up	0	MXD3	GO:0043231//intracellular membrane-bounded organelle	GO:0003676//nucleic acid binding	NA	K09114//MAX dimerization protein	gi|219283190|ref|NP_001136407.1|//max dimerization protein 3 isoform b [Homo sapiens];gi|194382566|dbj|BAG64453.1|//unnamed protein product [Homo sapiens]
54432	1873	964	3640	1.77275	0	Up	0	YIPF1	GO:0031224//intrinsic component of membrane;GO:0016023//null	NA	NA	NA	gi|10092643|ref|NP_061855.1|//protein YIPF1 [Homo sapiens];gi|221043128|dbj|BAH13241.1|//unnamed protein product [Homo sapiens]
4603	5151	66	249	1.77152	5.91069e-23	Up	7.79824e-23	MYBL1	GO:0031981//nuclear lumen	GO:0003676//nucleic acid binding	GO:0006351//transcription, DNA-templated	K09421//myb-related protein	gi|659928110|ref|NP_001281211.1|//myb-related protein A isoform 3 [Homo sapiens];gi|122937231|ref|NP_001073885.1|//myb-related protein A isoform 1 [Homo sapiens];gi|221139773|ref|NP_001138227.1|//myb-related protein A isoform 2 [Homo sapiens]
389289	1280	22	83	1.77152	7.03613e-09	Up	1.35163e-08	ANXA2R	NA	GO:0004871//signal transducer activity	NA	NA	gi|426384826|ref|XP_004058948.1|//PREDICTED: annexin-2 receptor [Gorilla gorilla gorilla]
22856	4567	12825.9	48324.2	1.7696	0	Up	0	CHSY1	GO:0031224//intrinsic component of membrane;GO:0000139//Golgi membrane	GO:0043169//cation binding;GO:0015020//glucuronosyltransferase activity;GO:0008376//acetylgalactosaminyltransferase activity	GO:0006024//glycosaminoglycan biosynthetic process	K13499//chondroitin sulfate synthase [EC:2.4.1.175 2.4.1.226]	gi|31542309|ref|NP_055733.2|//chondroitin sulfate synthase 1 precursor [Homo sapiens]
10248	949	72	271	1.76814	9.36083e-25	Up	1.19819e-24	POP7	GO:0031981//nuclear lumen;GO:0030681//multimeric ribonuclease P complex	GO:0004549//tRNA-specific ribonuclease activity;GO:0005488//binding	GO:0006399//tRNA metabolic process	K14527//ribonuclease P/MRP protein subunit RPP20 [EC:3.1.26.5]	gi|426357271|ref|XP_004045968.1|//PREDICTED: ribonuclease P protein subunit p20 isoform 2 [Gorilla gorilla gorilla]
166	1687	493	1851	1.76456	2.51845e-157	Up	1.31988e-157	AES	GO:0043231//intracellular membrane-bounded organelle	GO:0003712//transcription cofactor activity;GO:0005488//binding	GO:0000122//negative regulation of transcription from RNA polymerase II promoter;GO:0009653//anatomical structure morphogenesis;GO:0043393//regulation of protein binding;GO:0030178//negative regulation of Wnt signaling pathway;GO:0034097//response to cytokine;GO:0032501//multicellular organismal process;GO:0048731//system development	K04497//groucho	gi|39812019|ref|NP_945320.1|//amino-terminal enhancer of split isoform a [Homo sapiens];gi|926695816|ref|XP_013820761.1|//PREDICTED: amino-terminal enhancer of split [Capra hircus]
8416	1843	121	454	1.7636	4.84513e-40	Up	5.04312e-40	ANXA9	GO:0044444//cytoplasmic part	GO:0046872//metal ion binding;GO:0042802//identical protein binding;GO:0004888//transmembrane signaling receptor activity;GO:0005543//phospholipid binding	GO:0007155//cell adhesion	K17090//annexin A9	gi|145864465|ref|NP_003559.2|//annexin A9 [Homo sapiens]
84899	3857	16	60	1.7628	7.06786e-07	Up	1.49199e-06	TMTC4	GO:0031224//intrinsic component of membrane	NA	NA	K09667//protein O-GlcNAc transferase [EC:2.4.1.255]	gi|557128961|ref|NP_001273382.1|//transmembrane and TPR repeat-containing protein 4 isoform 3 [Homo sapiens] ;gi|635026475|ref|XP_007958982.1|//PREDICTED: transmembrane and TPR repeat-containing protein 4 isoform X1 [Chlorocebus sabaeus];gi|118766330|ref|NP_116202.2|//transmembrane and TPR repeat-containing protein 4 isoform 1 [Homo sapiens]
9262	5324	19909	74623.8	1.76213	0	Up	0	STK17B	GO:0043231//intracellular membrane-bounded organelle;GO:0005856//cytoskeleton	GO:0032559//adenyl ribonucleotide binding;GO:0004672//protein kinase activity	GO:0012502//induction of programmed cell death;GO:0006464//cellular protein modification process;GO:0035556//intracellular signal transduction	K08804//serine/threonine kinase 17 [EC:2.7.11.1]	gi|4758194|ref|NP_004217.1|//serine/threonine-protein kinase 17B [Homo sapiens]
123920	1962	711	2660	1.75942	2.59801e-224	Up	1.11116e-224	CMTM3	GO:0031224//intrinsic component of membrane;GO:0044421//extracellular region part	GO:0005102//receptor binding	GO:0042221//response to chemical	NA	gi|817306324|ref|XP_012323717.1|//PREDICTED: CKLF-like MARVEL transmembrane domain-containing protein 3 [Aotus nancymaae]
53834	3105	19	71	1.75773	8.66515e-08	Up	1.74711e-07	FGFRL1	GO:0031224//intrinsic component of membrane	GO:0005539//glycosaminoglycan binding;GO:0019838//growth factor binding;GO:0004714//transmembrane receptor protein tyrosine kinase activity	GO:0060411//cardiac septum morphogenesis;GO:0007169//transmembrane receptor protein tyrosine kinase signaling pathway;GO:0008283//cell proliferation;GO:0003170//heart valve development;GO:0060538//skeletal muscle organ development;GO:0016049//cell growth	K05095//fibroblast growth factor receptor 4 [EC:2.7.10.1];K05094//fibroblast growth factor receptor 3 [EC:2.7.10.1]	gi|51988910|ref|NP_068742.2|//fibroblast growth factor receptor-like 1 precursor [Homo sapiens];gi|635139048|ref|XP_008016377.1|//PREDICTED: fibroblast growth factor receptor-like 1 isoform X1 [Chlorocebus sabaeus]
55622	2706	7	26.15	1.7573	0.000593348	Up	0.00152402	TTC27	NA	GO:0005488//binding	NA	K16531//Bardet-Biedl syndrome 4 protein	gi|42476022|ref|NP_060205.3|//tetratricopeptide repeat protein 27 isoform 1 [Homo sapiens]
8620	854	49	183	1.7569	3.41575e-17	Up	5.08247e-17	NPFF	NA	GO:0005179//hormone activity	GO:0007186//G-protein coupled receptor signaling pathway;GO:0007267//cell-cell signaling	K05247//neuropeptide FF-amide peptide	gi|998429241|ref|NP_001307225.1|//pro-FMRFamide-related neuropeptide FF isoform 2 [Homo sapiens];gi|4503769|ref|NP_003708.1|//pro-FMRFamide-related neuropeptide FF isoform 1 preproprotein [Homo sapiens]
29097	1383	192	717	1.75678	8.84022e-62	Up	7.44265e-62	CNIH4	GO:0043231//intracellular membrane-bounded organelle;GO:0031224//intrinsic component of membrane	GO:0005488//binding	GO:0007165//signal transduction	K20368//protein cornichon	gi|7661824|ref|NP_054903.1|//protein cornichon homolog 4 isoform 1 [Homo sapiens];gi|667296344|ref|XP_008579571.1|//PREDICTED: protein cornichon homolog 4 isoform X1 [Galeopterus variegatus];gi|655859997|ref|XP_008266579.1|//PREDICTED: protein cornichon homolog 4 isoform X4 [Oryctolagus cuniculus];gi|467093527|ref|NP_001264126.1|//protein cornichon homolog 4 isoform 2 [Homo sapiens]
34	2623	15	56	1.75638	1.64169e-06	Up	3.52919e-06	ACADM	GO:0044429//mitochondrial part	GO:0005515//protein binding;GO:0003995//acyl-CoA dehydrogenase activity;GO:0050662//coenzyme binding	GO:0006578//amino-acid betaine biosynthetic process;GO:0006635//fatty acid beta-oxidation;GO:0009437//carnitine metabolic process	K00249//acyl-CoA dehydrogenase [EC:1.3.8.7]	gi|821009198|ref|XP_012355949.1|//PREDICTED: medium-chain specific acyl-CoA dehydrogenase, mitochondrial isoform X6 [Nomascus leucogenys];gi|554506556|ref|NP_001272972.1|//medium-chain specific acyl-CoA dehydrogenase, mitochondrial isoform d precursor [Homo sapiens];gi|426330056|ref|XP_004026042.1|//PREDICTED: LOW QUALITY PROTEIN: medium-chain specific acyl-CoA dehydrogenase, mitochondrial [Goril…
57194	5235	18	67	1.75208	2.00131e-07	Up	4.11107e-07	ATP10A	GO:0031224//intrinsic component of membrane	GO:0046872//metal ion binding;GO:0042625//ATPase coupled ion transmembrane transporter activity;GO:0032559//adenyl ribonucleotide binding;GO:0005548//phospholipid transporter activity	GO:0065008//regulation of biological quality;GO:0006869//lipid transport;GO:0009206//purine ribonucleoside triphosphate biosynthetic process;GO:0006811//ion transport	K01530//phospholipid-translocating ATPase [EC:3.6.3.1]	gi|14424433|ref|NP_077816.1|//probable phospholipid-transporting ATPase VA [Homo sapiens]
10240	1344	25	93	1.75122	1.32511e-09	Up	2.4636e-09	MRPS31	GO:0043231//intracellular membrane-bounded organelle;GO:0030529//intracellular ribonucleoprotein complex	GO:0005515//protein binding	NA	K17410//small subunit ribosomal protein S31	gi|186928854|ref|NP_005821.2|//28S ribosomal protein S31, mitochondrial [Homo sapiens]
11016	5798	767	2852	1.75059	1.06832e-238	Up	4.42507e-239	ATF7	GO:0031981//nuclear lumen	GO:0046872//metal ion binding;GO:0003677//DNA binding;GO:0005515//protein binding;GO:0046914//transition metal ion binding;GO:0001071//null	GO:0006351//transcription, DNA-templated;GO:0051704//multi-organism process	K09045//activating transcription factor 7	gi|194239643|ref|NP_001123532.1|//cyclic AMP-dependent transcription factor ATF-7 isoform 3 [Homo sapiens] ;gi|5802980|ref|NP_006847.1|//cyclic AMP-dependent transcription factor ATF-7 isoform 2 [Homo sapiens];gi|331999948|ref|NP_001193611.1|//cyclic AMP-dependent transcription factor ATF-7 isoform 4 [Homo sapiens];gi|12643393|sp|P17544.2|ATF7_HUMAN//RecName: Full=Cyclic AMP-dependent transcripti…
3820	740	60	223	1.74992	1.9387e-20	Up	2.69947e-20	KLRB1	GO:0031224//intrinsic component of membrane	GO:0030246//carbohydrate binding;GO:0004872//receptor activity	GO:0007165//signal transduction	K06543//killer cell lectin-like receptor subfamily B	gi|4504879|ref|NP_002249.1|//killer cell lectin-like receptor subfamily B member 1 [Homo sapiens]
4208	6263	772	2864	1.74727	4.57855e-239	Up	1.89262e-239	MEF2C	GO:0016604//nuclear body	GO:0003677//DNA binding;GO:0043565//sequence-specific DNA binding;GO:0019899//enzyme binding;GO:0001071//null	GO:0014706//striated muscle tissue development;GO:0048771//tissue remodeling;GO:0001503//ossification;GO:0045637//regulation of myeloid cell differentiation;GO:0050804//modulation of chemical synaptic transmission;GO:0032092//positive regulation of protein binding;GO:0000122//negative regulation of transcription from RNA polymerase II promoter;GO:0001944//vasculature development;GO:0007169//trans…	K04454//MADS-box transcription enhancer factor 2C	gi|301069384|ref|NP_001180278.1|//myocyte-specific enhancer factor 2C isoform 5 [Homo sapiens];gi|196114945|ref|NP_001124477.1|//myocyte-specific enhancer factor 2C isoform 2 [Homo sapiens] ;gi|301069380|ref|NP_001180276.1|//myocyte-specific enhancer factor 2C isoform 3 [Homo sapiens] ;gi|119616371|gb|EAW95965.1|//MADS box transcription enhancer factor 2, polypeptide C (myocyte enhancer factor 2C…
540	6160	119	441	1.74573	1.98362e-38	Up	2.10259e-38	ATP7B	GO:0012505//endomembrane system;GO:0005768//endosome;GO:0044459//plasma membrane part;GO:0031410//cytoplasmic vesicle;GO:0016021//integral component of membrane;GO:0044431//Golgi apparatus part	GO:0032559//adenyl ribonucleotide binding;GO:0043682//copper-transporting ATPase activity;GO:0046914//transition metal ion binding	GO:0035434//copper ion transmembrane transport;GO:0009206//purine ribonucleoside triphosphate biosynthetic process;GO:0010038//response to metal ion;GO:0006874//cellular calcium ion homeostasis	K17686//Cu+-exporting ATPase [EC:3.6.3.54]	gi|795098291|ref|XP_011794355.1|//PREDICTED: copper-transporting ATPase 2 isoform X5 [Colobus angolensis palliatus];gi|795098298|ref|XP_011794363.1|//PREDICTED: copper-transporting ATPase 2 isoform X6 [Colobus angolensis palliatus];gi|530402446|ref|XP_005266485.1|//PREDICTED: copper-transporting ATPase 2 isoform X7 [Homo sapiens];gi|795098265|ref|XP_011794322.1|//PREDICTED: copper-transporting AT…
50485	3264	37	137	1.74449	3.1853e-13	Up	5.23456e-13	SMARCAL1	GO:0043231//intracellular membrane-bounded organelle	GO:0032559//adenyl ribonucleotide binding;GO:0004386//helicase activity;GO:0042623//ATPase activity, coupled;GO:0003676//nucleic acid binding	GO:0006325//chromatin organization;GO:0006355//regulation of transcription, DNA-templated	K14440//SWI/SNF-related matrix-associated actin-dependent regulator of chromatin subfamily A-like protein 1 [EC:3.6.4.12]	gi|21071060|ref|NP_054859.2|//SWI/SNF-related matrix-associated actin-dependent regulator of chromatin subfamily A-like protein 1 [Homo sapiens]
4300	6703	16	59.19	1.7432	9.90263e-07	Up	2.1096e-06	MLLT3	NA	GO:0005488//binding	GO:0003002//regionalization	K15187//YEATS domain-containing protein 1/3	gi|557878595|ref|NP_001273620.1|//protein AF-9 isoform b [Homo sapiens] ;gi|817270709|ref|XP_012305418.1|//PREDICTED: protein AF-9 [Aotus nancymaae]
399665	3837	123	454	1.73995	2.48755e-39	Up	2.60668e-39	FAM102A	NA	NA	NA	NA	gi|767957421|ref|XP_011516978.1|//PREDICTED: protein FAM102A isoform X2 [Homo sapiens];gi|958774474|ref|XP_014719110.1|//PREDICTED: protein FAM102A isoform X1 [Equus asinus]
23401	2222	6987.7	25730.3	1.73649	0	Up	0	FRAT2	NA	NA	GO:0032501//multicellular organismal process	K03096//frequently rearranged in advanced T-cell lymphomas 2	gi|16507243|ref|NP_036215.1|//GSK-3-binding protein FRAT2 [Homo sapiens]
9398	3551	22	81	1.73633	1.61625e-08	Up	3.15249e-08	CD101	GO:0031224//intrinsic component of membrane	GO:0016810//hydrolase activity, acting on carbon-nitrogen (but not peptide) bonds	GO:0007165//signal transduction	K06522//immunoglobulin superfamily, member 2/3	gi|119577068|gb|EAW56664.1|//immunoglobulin superfamily, member 2, isoform CRA_a [Homo sapiens];gi|368711318|ref|NP_001243040.1|//immunoglobulin superfamily member 2 isoform 2 precursor [Homo sapiens]
23231	4390	103	379	1.73547	4.85488e-33	Up	5.50212e-33	SEL1L3	GO:0031224//intrinsic component of membrane	NA	NA	K14026//SEL1 protein	gi|154689719|ref|NP_056002.2|//protein sel-1 homolog 3 isoform 1 [Homo sapiens];gi|662236802|ref|NP_001284521.1|//protein sel-1 homolog 3 isoform 2 [Homo sapiens]
57616	5184	462	1697	1.73294	7.44221e-141	Up	4.12621e-141	TSHZ3	GO:0043231//intracellular membrane-bounded organelle;GO:0030427//site of polarized growth	GO:0003677//DNA binding;GO:0046914//transition metal ion binding;GO:0001071//null	GO:0001822//kidney development;GO:0014849//ureter smooth muscle contraction;GO:0006351//transcription, DNA-templated;GO:0060537//muscle tissue development;GO:0043009//chordate embryonic development;GO:0030323//respiratory tube development;GO:0051145//smooth muscle cell differentiation;GO:0050879//multicellular organismal movement;GO:0051149//positive regulation of muscle cell differentiation;GO:0…	K09236//teashirt	gi|52546031|emb|CAH56184.1|//hypothetical protein [Homo sapiens]
51463	2150	25.47	93.52	1.73239	1.57076e-09	Up	2.92879e-09	GPR89B	GO:0031224//intrinsic component of membrane;GO:0000139//Golgi membrane	GO:0005244//voltage-gated ion channel activity;GO:0060089//molecular transducer activity	GO:0043269//regulation of ion transport;GO:0007249//I-kappaB kinase/NF-kappaB signaling;GO:0045851//pH reduction	NA	gi|7706704|ref|NP_057418.1|//Golgi pH regulator B [Homo sapiens]
347688	1504	9.36	34.35	1.73164	0.000132412	Up	0.000322936	TUBB8	GO:0032991//macromolecular complex;GO:0015630//microtubule cytoskeleton	GO:0032561//guanyl ribonucleotide binding;GO:0017111//nucleoside-triphosphatase activity	GO:0007017//microtubule-based process;GO:0009207//purine ribonucleoside triphosphate catabolic process;GO:0043623//cellular protein complex assembly	K07375//tubulin beta	gi|42558279|ref|NP_817124.1|//tubulin beta-8 chain [Homo sapiens]
55268	2010	15	55	1.73038	2.48925e-06	Up	5.41137e-06	ECHDC2	GO:0043231//intracellular membrane-bounded organelle	GO:0003824//catalytic activity	GO:0032787//monocarboxylic acid metabolic process;GO:0044238//primary metabolic process	K05607//methylglutaconyl-CoA hydratase [EC:4.2.1.18]	gi|966917633|ref|XP_014995372.1|//PREDICTED: enoyl-CoA hydratase domain-containing protein 2, mitochondrial isoform X1 [Macaca mulatta];gi|150378541|ref|NP_060751.2|//enoyl-CoA hydratase domain-containing protein 2, mitochondrial isoform 2 [Homo sapiens];gi|966917635|ref|XP_014995378.1|//PREDICTED: enoyl-CoA hydratase domain-containing protein 2, mitochondrial isoform X2 [Macaca mulatta]
26015	4709	12	44	1.73038	2.0575e-05	Up	4.74165e-05	RPAP1	GO:0043231//intracellular membrane-bounded organelle	GO:0034062//5'-3' RNA polymerase activity;GO:0003676//nucleic acid binding	NA	NA	gi|24430139|ref|NP_056355.2|//RNA polymerase II-associated protein 1 [Homo sapiens]
79072	2451	9	33	1.73038	0.000173296	Up	0.000426693	FASTKD3	GO:0043231//intracellular membrane-bounded organelle	GO:0032559//adenyl ribonucleotide binding;GO:0016301//kinase activity	GO:0012501//programmed cell death;GO:0015980//energy derivation by oxidation of organic compounds	K08290//Fas-activated serine/threonine kinase [EC:2.7.11.8]	gi|40068497|ref|NP_076996.2|//FAST kinase domain-containing protein 3 [Homo sapiens];gi|119628500|gb|EAX08095.1|//hypothetical protein MGC5297, isoform CRA_b, partial [Homo sapiens]
21	6623	9	33	1.73038	0.000173296	Up	0.000426693	ABCA3	GO:0031224//intrinsic component of membrane;GO:0030141//secretory granule	GO:0015405//P-P-bond-hydrolysis-driven transmembrane transporter activity;GO:0032559//adenyl ribonucleotide binding;GO:0017111//nucleoside-triphosphatase activity	GO:0042221//response to chemical;GO:0051234//establishment of localization	K05643//ATP-binding cassette, subfamily A (ABC1), member 3	gi|116734710|ref|NP_001080.2|//ATP-binding cassette sub-family A member 3 [Homo sapiens]
51155	1617	2961.43	10858.4	1.73036	0	Up	0	HN1	GO:0043231//intracellular membrane-bounded organelle	NA	NA	NA	gi|795091810|ref|XP_011797976.1|//PREDICTED: hematological and neurological expressed 1 protein isoform X1 [Colobus angolensis palliatus];gi|355754370|gb|EHH58335.1|//hypothetical protein EGM_08161 [Macaca fascicularis];gi|795091817|ref|XP_011798058.1|//PREDICTED: hematological and neurological expressed 1 protein isoform X2 [Colobus angolensis palliatus];gi|50345294|ref|NP_001002032.1|//hematolo…
80740	932	47	172	1.72759	6.15651e-16	Up	9.43912e-16	LY6G6C	GO:0031224//intrinsic component of membrane	NA	NA	K06846//lymphocyte antigen 6 complex locus protein D/E/G6/H	gi|13376874|ref|NP_079537.1|//lymphocyte antigen 6 complex locus protein G6c precursor [Homo sapiens]
8365	374	41	150	1.72718	3.94421e-14	Up	6.31768e-14	HIST1H4H	NA	NA	NA	K11254//histone H4	gi|675675656|ref|XP_003804484.2|//PREDICTED: LOW QUALITY PROTEIN: uncharacterized protein LOC100980546 [Pan paniscus]
403341	6577	2343	8565	1.72601	0	Up	0	ZBTB34	GO:0031981//nuclear lumen	GO:0046914//transition metal ion binding;GO:0003676//nucleic acid binding	NA	K10508//zinc finger and BTB domain-containing protein 34	gi|544495555|ref|XP_005582249.1|//PREDICTED: zinc finger and BTB domain-containing protein 34 [Macaca fascicularis]
55793	3222	1538.47	5623.74	1.72595	0	Up	0	FAM63A	NA	GO:0005488//binding	NA	K12581//CCR4-NOT transcription complex subunit 7/8;K11447//histone demethylase [EC:1.14.11.-];K17985//activating molecule in BECN1-regulated autophagy protein 1	gi|253795488|ref|NP_001156730.1|//protein FAM63A isoform 3 [Homo sapiens];gi|686702381|ref|XP_009242898.1|//PREDICTED: protein FAM63A isoform X1 [Pongo abelii]
9760	4131	23	84	1.72467	1.05833e-08	Up	2.0497e-08	TOX	GO:0043231//intracellular membrane-bounded organelle	GO:0003676//nucleic acid binding	NA	K18808//toll-like receptor 13	gi|7662322|ref|NP_055544.1|//thymocyte selection-associated high mobility group box protein TOX [Homo sapiens]
10170	1810	286	1043	1.72257	1.27616e-86	Up	9.14824e-87	DHRS9	GO:0031227//intrinsic component of endoplasmic reticulum membrane	GO:0030283//testosterone dehydrogenase [NAD(P)] activity;GO:0016853//isomerase activity	GO:0001523//retinoid metabolic process;GO:0035238//vitamin A biosynthetic process;GO:0030154//cell differentiation;GO:0008207//C21-steroid hormone metabolic process	K11149//dehydrogenase/reductase SDR family member 9 [EC:1.1.-.-]	gi|576796343|ref|NP_001276692.1|//dehydrogenase/reductase SDR family member 9 isoform 2 [Homo sapiens]
2215	2161	121052	349918	1.3873	0	Up	0	FCGR3B	GO:0031224//intrinsic component of membrane	GO:0019865//immunoglobulin binding;GO:0004871//signal transducer activity	GO:0002682//regulation of immune system process	K06463//low affinity immunoglobulin gamma Fc receptor III	gi|957949380|gb|ALQ33519.1|//Fc fragment of IgG low affinity IIIa receptor isoform 2, partial [Homo sapiens];gi|17389688|gb|AAH17865.1|//FCGR3A protein [Homo sapiens] ;gi|22477184|gb|AAH36723.1|//Fc fragment of IgG, low affinity IIIa, receptor (CD16a) [Homo sapiens] ;gi|194378676|dbj|BAG63503.1|//unnamed protein product [Homo sapiens]
401647	6465	14	51	1.72098	5.7752e-06	Up	1.28306e-05	GOLGA7B	GO:0043231//intracellular membrane-bounded organelle;GO:0012505//endomembrane system	NA	NA	K11728//nucleosome-remodeling factor subunit BPTF;K17584//phosphorylated CTD-interacting factor 1;K05546//alpha 1,3-glucosidase [EC:3.2.1.84]	gi|34531554|dbj|BAC86168.1|//unnamed protein product [Homo sapiens]
471	2094	14	51	1.72098	5.7752e-06	Up	1.28306e-05	ATIC	GO:0043231//intracellular membrane-bounded organelle;GO:0044444//cytoplasmic part	GO:0042802//identical protein binding;GO:0019238//cyclohydrolase activity;GO:0016742//hydroxymethyl-, formyl- and related transferase activity	GO:0009112//nucleobase metabolic process;GO:0009887//animal organ morphogenesis;GO:0009168//purine ribonucleoside monophosphate biosynthetic process	K00602//phosphoribosylaminoimidazolecarboxamide formyltransferase / IMP cyclohydrolase [EC:2.1.2.3 3.5.4.10]	gi|20127454|ref|NP_004035.2|//bifunctional purine biosynthesis protein PURH [Homo sapiens]
5050	1006	14.63	53.28	1.72058	3.74813e-06	Up	8.24601e-06	PAFAH1B3	GO:0044444//cytoplasmic part	GO:0016407//acetyltransferase activity;GO:0046983//protein dimerization activity	GO:0048232//male gamete generation;GO:0007417//central nervous system development;GO:0006629//lipid metabolic process	K16795//platelet-activating factor acetylhydrolase IB subunit beta/gamma [EC:3.1.1.47]	gi|544511666|ref|XP_005589439.1|//PREDICTED: platelet-activating factor acetylhydrolase IB subunit gamma isoform X1 [Macaca fascicularis];gi|725605482|ref|XP_010329370.1|//PREDICTED: platelet-activating factor acetylhydrolase IB subunit gamma isoform X1 [Saimiri boliviensis boliviensis]
29102	5405	44	160	1.71841	7.41664e-15	Up	1.16588e-14	DROSHA	GO:0031981//nuclear lumen	GO:0003723//RNA binding;GO:0043169//cation binding;GO:0016891//endoribonuclease activity, producing 5'-phosphomonoesters	GO:0022613//ribonucleoprotein complex biogenesis;GO:0016458//gene silencing	K03685//ribonuclease III [EC:3.1.26.3]	gi|155030236|ref|NP_001093882.1|//ribonuclease 3 isoform 2 [Homo sapiens] ;gi|931571151|ref|XP_014200419.1|//PREDICTED: LOW QUALITY PROTEIN: ribonuclease 3 [Pan paniscus]
660	2592	131	476	1.71731	1.97604e-40	Up	2.04846e-40	BMX	GO:0044444//cytoplasmic part	GO:0004713//protein tyrosine kinase activity;GO:0043169//cation binding;GO:0060089//molecular transducer activity;GO:0032559//adenyl ribonucleotide binding	GO:0007165//signal transduction;GO:0006464//cellular protein modification process;GO:0009888//tissue development;GO:0006915//apoptotic process	K08896//cytoplasmic tyrosine-protein kinase BMX [EC:2.7.10.2]	gi|675765543|ref|XP_008987239.1|//PREDICTED: cytoplasmic tyrosine-protein kinase BMX isoform X2 [Callithrix jacchus];gi|397468158|ref|XP_003805761.1|//PREDICTED: cytoplasmic tyrosine-protein kinase BMX isoform X1 [Pan paniscus]
1901	2942	65	236	1.71619	5.42783e-21	Up	7.4586e-21	S1PR1	GO:0031224//intrinsic component of membrane;GO:0009986//cell surface	GO:0008289//lipid binding;GO:0045125//bioactive lipid receptor activity	GO:0016477//cell migration;GO:0007154//cell communication;GO:0007417//central nervous system development;GO:0007155//cell adhesion;GO:0006357//regulation of transcription from RNA polymerase II promoter;GO:0050921//positive regulation of chemotaxis;GO:0007204//positive regulation of cytosolic calcium ion concentration;GO:0032232//negative regulation of actin filament bundle assembly;GO:0048646//a…	K04288//sphingosine 1-phosphate receptor 1	gi|426330537|ref|XP_004026266.1|//PREDICTED: sphingosine 1-phosphate receptor 1 isoform 3 [Gorilla gorilla gorilla];gi|194384762|dbj|BAG59541.1|//unnamed protein product [Homo sapiens]
2219	7675	7786.7	18553.4	1.10851	0	Up	0	FCN1	GO:0044421//extracellular region part	GO:0030246//carbohydrate binding;GO:0046872//metal ion binding;GO:0005515//protein binding	GO:0023052//signaling;GO:0002252//immune effector process	K10104//ficolin	gi|8051584|ref|NP_001994.2|//ficolin-1 precursor [Homo sapiens]
7697	2563	28.22	102.4	1.71534	3.79987e-10	Up	6.9151e-10	ZNF138	GO:0005622//intracellular	GO:0046872//metal ion binding;GO:0032559//adenyl ribonucleotide binding;GO:0032561//guanyl ribonucleotide binding;GO:0016301//kinase activity	GO:0043412//macromolecule modification;GO:0006351//transcription, DNA-templated	K09228//KRAB domain-containing zinc finger protein;K01008//selenide, water dikinase [EC:2.7.9.3]	gi|795417728|ref|XP_011946388.1|//PREDICTED: LOW QUALITY PROTEIN: zinc finger protein 117-like [Cercocebus atys];gi|307219240|ref|NP_001182533.1|//selenide, water dikinase 1 isoform 3 [Homo sapiens];gi|426356361|ref|XP_004045548.1|//PREDICTED: zinc finger protein 107 [Gorilla gorilla gorilla];gi|795373635|ref|XP_011788374.1|//PREDICTED: zinc finger protein 85 isoform X2 [Colobus angolensis pallia…
8654	6788	115	417	1.71433	1.41221e-35	Up	1.54928e-35	PDE5A	GO:0044444//cytoplasmic part	GO:0004114//3',5'-cyclic-nucleotide phosphodiesterase activity;GO:0046914//transition metal ion binding;GO:0019002//GMP binding	GO:0001775//cell activation;GO:0023052//signaling;GO:0007599//hemostasis;GO:0009123//nucleoside monophosphate metabolic process	K13762//cGMP-specific 3',5'-cyclic phosphodiesterase [EC:3.1.4.35]	gi|61744435|ref|NP_001074.2|//cGMP-specific 3',5'-cyclic phosphodiesterase isoform 1 [Homo sapiens];gi|119625682|gb|EAX05277.1|//phosphodiesterase 5A, cGMP-specific, isoform CRA_c [Homo sapiens];gi|61744430|ref|NP_236914.2|//cGMP-specific 3',5'-cyclic phosphodiesterase isoform 2 [Homo sapiens]
838	1253	840.15	3046.32	1.71426	1.64069e-247	Up	6.62531e-248	CASP5	GO:0044464//cell part	GO:0004175//endopeptidase activity;GO:0005488//binding	GO:0009612//response to mechanical stimulus;GO:0019538//protein metabolic process;GO:0006915//apoptotic process	K04395//caspase 5 [EC:3.4.22.58]	gi|767970656|ref|XP_011541322.1|//PREDICTED: caspase-5 isoform X1 [Homo sapiens];gi|209870069|ref|NP_004338.3|//caspase-5 isoform a precursor [Homo sapiens];gi|209870071|ref|NP_001129581.1|//caspase-5 isoform b precursor [Homo sapiens];gi|209870079|ref|NP_001129584.1|//caspase-5 isoform f precursor [Homo sapiens]
22928	2351	715	2591	1.71341	1.14272e-210	Up	5.07364e-211	SEPHS2	NA	GO:0032559//adenyl ribonucleotide binding;GO:0016301//kinase activity	GO:0009070//serine family amino acid biosynthetic process	K01008//selenide, water dikinase [EC:2.7.9.3]	gi|15011844|ref|NP_036380.2|//selenide, water dikinase 2 [Homo sapiens]
84790	1808	500.39	1811.92	1.71231	8.62054e-148	Up	4.6802e-148	TUBA1C	GO:0005874//microtubule	GO:0032561//guanyl ribonucleotide binding;GO:0017111//nucleoside-triphosphatase activity	GO:0006458//'de novo' protein folding;GO:0007017//microtubule-based process;GO:0009207//purine ribonucleoside triphosphate catabolic process;GO:0043623//cellular protein complex assembly	K07374//tubulin alpha	gi|14389309|ref|NP_116093.1|//tubulin alpha-1C chain isoform c [Homo sapiens];gi|823407798|ref|XP_012417997.1|//PREDICTED: tubulin alpha-1B chain-like isoform X1 [Odobenus rosmarus divergens];gi|733605926|ref|NP_001290043.1|//tubulin alpha-1C chain isoform a [Homo sapiens]
53838	2120	13	47	1.71006	1.3397e-05	Up	3.05016e-05	C11orf24	GO:0031224//intrinsic component of membrane	NA	NA	K10267//F-box and WD-40 domain protein 12/13/14/15/16/17/19	gi|33341674|gb|AAQ15208.1|AF370372_1//FP2568 [Homo sapiens];gi|665505959|ref|NP_001287842.1|//uncharacterized protein C11orf24 isoform 2 precursor [Homo sapiens]
64412	4880	2311	8349	1.709	0	Up	0	GZF1	GO:0043231//intracellular membrane-bounded organelle	GO:0046914//transition metal ion binding;GO:0003676//nucleic acid binding	GO:0006357//regulation of transcription from RNA polymerase II promoter;GO:0048754//branching morphogenesis of an epithelial tube	K09228//KRAB domain-containing zinc finger protein	gi|948549872|ref|NP_001303948.1|//GDNF-inducible zinc finger protein 1 isoform b [Homo sapiens] ;gi|11968150|ref|NP_071927.1|//GDNF-inducible zinc finger protein 1 isoform a [Homo sapiens]
4299	9375	5296	19129	1.7087	0	Up	0	AFF1	GO:0043231//intracellular membrane-bounded organelle	GO:0001071//null	GO:0006355//regulation of transcription, DNA-templated;GO:0006351//transcription, DNA-templated	K15184//AF4/FMR2 family member 1	gi|927669124|ref|NP_001300889.1|//AF4/FMR2 family member 1 isoform 4 [Homo sapiens];gi|5174573|ref|NP_005926.1|//AF4/FMR2 family member 1 isoform 2 [Homo sapiens]
9826	6797	2818	10174	1.70806	0	Up	0	ARHGEF11	GO:0043231//intracellular membrane-bounded organelle;GO:0016020//membrane;GO:0044444//cytoplasmic part	GO:0060089//molecular transducer activity;GO:0005088//Ras guanyl-nucleotide exchange factor activity;GO:0005102//receptor binding;GO:0008047//enzyme activator activity	GO:0006936//muscle contraction;GO:0006355//regulation of transcription, DNA-templated;GO:0016049//cell growth;GO:0007266//Rho protein signal transduction;GO:0007169//transmembrane receptor protein tyrosine kinase signaling pathway;GO:0007163//establishment or maintenance of cell polarity;GO:0007010//cytoskeleton organization;GO:0009966//regulation of signal transduction;GO:0006935//chemotaxis	K12331//Rho guanine nucleotide exchange factor 11	gi|7662086|ref|NP_055599.1|//rho guanine nucleotide exchange factor 11 isoform 1 [Homo sapiens];gi|38026934|ref|NP_937879.1|//rho guanine nucleotide exchange factor 11 isoform 2 [Homo sapiens]
5509	3481	1015	3662.03	1.70708	2.13992e-295	Up	7.76933e-296	PPP1R3D	NA	GO:0004721//phosphoprotein phosphatase activity;GO:0005488//binding	GO:0006073//cellular glucan metabolic process	K07189//protein phosphatase 1 regulatory subunit 3A/B/C/D/E	gi|332858877|ref|XP_001142110.2|//PREDICTED: protein phosphatase 1 regulatory subunit 3D [Pan troglodytes]
25939	3189	1302.36	4694.83	1.70586	0	Up	0	SAMHD1	GO:0043231//intracellular membrane-bounded organelle	GO:0003824//catalytic activity	GO:0031347//regulation of defense response;GO:0002252//immune effector process	K12830//splicing factor 3B subunit 3	gi|38016914|ref|NP_056289.2|//deoxynucleoside triphosphate triphosphohydrolase SAMHD1 [Homo sapiens]
149628	2093	48	172.99	1.7055	9.16394e-16	Up	1.41093e-15	PYHIN1	GO:0016604//nuclear body	NA	GO:0009987//cellular process	K12966//absent in melanoma 2	gi|39540514|ref|NP_689714.2|//pyrin and HIN domain-containing protein 1 isoform alpha 1 [Homo sapiens];gi|41282048|ref|NP_945146.1|//pyrin and HIN domain-containing protein 1 isoform alpha 2 [Homo sapiens];gi|41282056|ref|NP_945147.1|//pyrin and HIN domain-containing protein 1 isoform beta 1 [Homo sapiens];gi|41282051|ref|NP_945148.1|//pyrin and HIN domain-containing protein 1 isoform beta 2 [Hom…
84869	3523	60	216	1.70391	3.38453e-19	Up	4.82583e-19	CBR4	GO:0044429//mitochondrial part	GO:0050661//NADP binding;GO:0003959//NADPH dehydrogenase activity	GO:0006631//fatty acid metabolic process;GO:0051260//protein homooligomerization	K11539//carbonyl reductase 4 [EC:1.1.1.-]	gi|40254992|ref|NP_116172.2|//carbonyl reductase family member 4 [Homo sapiens]
51754	2502	15	54	1.70391	3.75768e-06	Up	8.26912e-06	TMEM8B	NA	NA	NA	NA	gi|795353213|ref|XP_011746507.1|//PREDICTED: transmembrane protein 8B isoform X2 [Macaca nemestrina];gi|6996651|gb|AAF34820.1|AF149297_1//NAG-5 protein [Homo sapiens]
51308	2203	10	36	1.70391	0.000112362	Up	0.000272618	REEP2	GO:0031224//intrinsic component of membrane	NA	NA	K17338//receptor expression-enhancing protein 1/2/3/4	gi|670998117|ref|XP_008689949.1|//PREDICTED: receptor expression-enhancing protein 2 [Ursus maritimus];gi|424036628|ref|NP_001258732.1|//receptor expression-enhancing protein 2 isoform 1 [Homo sapiens];gi|585722524|ref|XP_006903140.1|//PREDICTED: receptor expression-enhancing protein 2 isoform X1 [Elephantulus edwardii];gi|42476206|ref|NP_057690.2|//receptor expression-enhancing protein 2 isoform…
51330	1048	298	1071	1.70149	2.1172e-87	Up	1.51119e-87	TNFRSF12A	GO:0031252//cell leading edge;GO:0031224//intrinsic component of membrane	GO:0004871//signal transducer activity	GO:0012501//programmed cell death;GO:0006929//substrate-dependent cell migration;GO:0030307//positive regulation of cell growth;GO:0032501//multicellular organismal process;GO:0048646//anatomical structure formation involved in morphogenesis;GO:0048869//cellular developmental process	K05149//tumor necrosis factor receptor superfamily member 12A	gi|7706186|ref|NP_057723.1|//tumor necrosis factor receptor superfamily member 12A precursor [Homo sapiens]
26234	3534	11935	42889	1.70132	0	Up	0	FBXL5	GO:0044444//cytoplasmic part;GO:0031461//cullin-RING ubiquitin ligase complex	GO:0019787//ubiquitin-like protein transferase activity;GO:0046914//transition metal ion binding	GO:0043161//proteasome-mediated ubiquitin-dependent protein catabolic process;GO:0032446//protein modification by small protein conjugation;GO:0055080//cation homeostasis	K10271//F-box and leucine-rich repeat protein 5	gi|31874009|emb|CAD97924.1|//hypothetical protein [Homo sapiens];gi|302129687|ref|NP_001180463.1|//F-box/LRR-repeat protein 5 isoform 3 [Homo sapiens];gi|6103639|gb|AAF03700.1|//F-box protein FBL5 [Homo sapiens];gi|7688697|gb|AAF67489.1|AF157323_1//p45SKP2-like protein [Homo sapiens]
60686	2283	213	765	1.70052	6.14076e-63	Up	5.1061e-63	C14orf93	NA	NA	NA	NA	gi|195233774|ref|NP_068763.2|//uncharacterized protein C14orf93 isoform a precursor [Homo sapiens];gi|15679982|gb|AAH14299.1|//C14orf93 protein [Homo sapiens]
346007	10589	34	122	1.69919	1.31506e-11	Up	2.26568e-11	EYS	NA	GO:0046872//metal ion binding	GO:0050953//sensory perception of light stimulus	K19601//protein eyes shut	gi|224451128|ref|NP_001136272.1|//protein eyes shut homolog isoform 1 precursor [Homo sapiens];gi|635172842|ref|NP_001278938.1|//protein eyes shut homolog isoform 4 precursor [Homo sapiens];gi|224451131|ref|NP_001136273.1|//protein eyes shut homolog isoform 2 precursor [Homo sapiens];gi|38093661|ref|NP_938024.1|//protein eyes shut homolog isoform 3 precursor [Homo sapiens]
2352	903	497	2032	1.8875	5.77562e-189	Up	2.73477e-189	FOLR3	GO:0044425//membrane part	GO:0016597//amino acid binding;GO:0004871//signal transducer activity	GO:0006865//amino acid transport	K13649//folate receptor	gi|1169723|sp|P41439.1|FOLR3_HUMAN//RecName: Full=Folate receptor gamma; Short=FR-gamma; AltName: Full=Folate receptor 3; Flags: Precursor;gi|355566837|gb|EHH23216.1|//hypothetical protein EGK_06644 [Macaca mulatta]
55113	2710	4382	15715	1.69839	0	Up	0	XKR8	GO:0031224//intrinsic component of membrane	NA	NA	K01128//sphingomyelin phosphodiesterase acid-like 3 [EC:3.1.4.-]	gi|24431977|ref|NP_060523.2|//XK-related protein 8 [Homo sapiens]
8872	1566	2549.47	9143.03	1.69839	0	Up	0	CDC123	GO:0044424//intracellular part	NA	GO:0000278//mitotic cell cycle;GO:0008283//cell proliferation;GO:0051318//G1 phase	NA	gi|221316620|ref|NP_006014.2|//cell division cycle protein 123 homolog [Homo sapiens]
84636	1258	12	43	1.69722	3.11381e-05	Up	7.27312e-05	GPR174	GO:0031224//intrinsic component of membrane	GO:0001608//G-protein coupled nucleotide receptor activity	NA	K08391//G protein-coupled receptor 174	gi|14211849|ref|NP_115942.1|//probable G-protein coupled receptor 174 [Homo sapiens]
84674	4097	516.6	1850.31	1.69656	5.93211e-149	Up	3.20061e-149	CARD6	GO:0044464//cell part	NA	GO:0006915//apoptotic process	K12797//caspase recruitment domain-containing protein 6	gi|16554564|ref|NP_115976.2|//caspase recruitment domain-containing protein 6 [Homo sapiens]
23353	3977	26	93	1.69463	2.96976e-09	Up	5.6089e-09	SUN1	NA	NA	NA	K19347//SUN domain-containing protein 1/2	gi|284925165|ref|NP_001165415.1|//SUN domain-containing protein 1 isoform c [Homo sapiens];gi|284925167|ref|NP_001165416.1|//SUN domain-containing protein 1 isoform d [Homo sapiens];gi|148745116|gb|AAI42708.1|//UNC84A protein [Homo sapiens]
10140	2188	3514	12566	1.69425	0	Up	0	TOB1	GO:0044424//intracellular part	GO:0030674//protein binding, bridging;GO:0003712//transcription cofactor activity	GO:0008283//cell proliferation;GO:0006606//protein import into nucleus;GO:0045596//negative regulation of cell differentiation;GO:0030509//BMP signaling pathway	K14443//protein Tob/BTG	gi|953267683|pdb|5CI9|A//Chain A, Crystal Structure Of Human Tob In Complex With Inhibitor Fragment 6
11278	10923	89	318	1.69306	3.86909e-27	Up	4.77848e-27	KLF12	GO:0043231//intracellular membrane-bounded organelle	GO:0046914//transition metal ion binding;GO:0003712//transcription cofactor activity;GO:0001071//null;GO:0003676//nucleic acid binding	GO:0006357//regulation of transcription from RNA polymerase II promoter	K09205//krueppel-like factor 8/12	gi|21071074|ref|NP_009180.3|//Krueppel-like factor 12 [Homo sapiens]
6715	2290	21	75	1.69242	8.46438e-08	Up	1.70544e-07	SRD5A1	GO:0031224//intrinsic component of membrane;GO:0043231//intracellular membrane-bounded organelle;GO:0031090//organelle membrane;GO:0044444//cytoplasmic part	GO:0033765//steroid dehydrogenase activity, acting on the CH-CH group of donors	GO:0006694//steroid biosynthetic process;GO:0003006//developmental process involved in reproduction;GO:0042221//response to chemical;GO:0048869//cellular developmental process	K12343//3-oxo-5-alpha-steroid 4-dehydrogenase 1 [EC:1.3.1.22]	gi|4507201|ref|NP_001038.1|//3-oxo-5-alpha-steroid 4-dehydrogenase 1 [Homo sapiens];gi|6523819|gb|AAF14869.1|AF113128_1//steroid-5-alpha-reductase isoform [Homo sapiens];gi|767934600|ref|XP_011512405.1|//PREDICTED: 3-oxo-5-alpha-steroid 4-dehydrogenase 1 isoform X1 [Homo sapiens]
5190	3428	149	532	1.69203	4.58083e-44	Up	4.52859e-44	PEX6	GO:0044439//peroxisomal part	GO:0005515//protein binding;GO:0032559//adenyl ribonucleotide binding;GO:0016887//ATPase activity	GO:0031647//regulation of protein stability;GO:0016558//protein import into peroxisome matrix;GO:0009207//purine ribonucleoside triphosphate catabolic process	K13339//peroxin-6	gi|1354753|gb|AAC50655.1|//Pxaaa1p [Homo sapiens];gi|18147122|dbj|BAB83048.1|//peroxin Pex6p [Homo sapiens];gi|937834196|ref|NP_001303242.1|//peroxisome biogenesis factor 6 isoform 2 [Homo sapiens]
79626	1199	215	767.44	1.69163	1.10865e-62	Up	9.23721e-63	TNFAIP8L2	NA	NA	GO:0006952//defense response	NA	gi|675742707|ref|XP_008982578.1|//PREDICTED: tumor necrosis factor alpha-induced protein 8-like protein 2 isoform X1 [Callithrix jacchus]
9061	2558	1166	4162	1.69162	0	Up	0	PAPSS1	GO:0044444//cytoplasmic part	GO:0032559//adenyl ribonucleotide binding;GO:0016301//kinase activity;GO:0004779//sulfate adenylyltransferase activity	GO:0006790//sulfur compound metabolic process;GO:0034036//purine ribonucleoside bisphosphate biosynthetic process;GO:0048731//system development	K13811//3'-phosphoadenosine 5'-phosphosulfate synthase [EC:2.7.7.4 2.7.1.25]	gi|635044160|ref|XP_007997662.1|//PREDICTED: bifunctional 3'-phosphoadenosine 5'-phosphosulfate synthase 1 isoform X1 [Chlorocebus sabaeus]
55715	2750	209	745	1.68965	8.2471e-61	Up	6.99892e-61	DOK4	GO:0043231//intracellular membrane-bounded organelle	GO:0005102//receptor binding	GO:0007167//enzyme linked receptor protein signaling pathway;GO:0048731//system development	K14752//docking protein 1;K20234//docking protein 2	gi|548502975|ref|XP_005692081.1|//PREDICTED: docking protein 4 [Capra hircus];gi|530424099|ref|XP_005256099.1|//PREDICTED: docking protein 4 isoform X2 [Homo sapiens]
84747	4413	179	638	1.68951	2.38852e-52	Up	2.16328e-52	UNC119B	NA	NA	NA	K05291//phosphatidylinositol glycan, class S	gi|119618623|gb|EAW98217.1|//hCG27366, isoform CRA_c [Homo sapiens]
84992	1356	160.18	570.77	1.68913	5.01503e-47	Up	4.8155e-47	PIGY	GO:0031224//intrinsic component of membrane;GO:0043231//intracellular membrane-bounded organelle;GO:0031090//organelle membrane;GO:0043234//protein complex	GO:0005488//binding	GO:0006497//protein lipidation	K11001//phosphatidylinositol glycan anchor biosynthesis, class Y	gi|119626427|gb|EAX06022.1|//hCG2042259, partial [Homo sapiens]
2720	2566	813.13	1925.06	1.09926	6.13934e-81	Up	4.53905e-81	GLB1	GO:0000323//lytic vacuole	GO:0015925//galactosidase activity;GO:0043167//ion binding	GO:0044238//primary metabolic process	K12309//beta-galactosidase [EC:3.2.1.23]	gi|179421|gb|AAA35599.1|//beta-galactosidase related protein precursor [Homo sapiens] ;gi|179401|gb|AAA51819.1|//beta-D-galactosidase precursor (EC 3.2.1.23) [Homo sapiens];gi|950426350|ref|NP_001303969.1|//beta-galactosidase isoform d precursor [Homo sapiens]
4987	3302	336	1195	1.68639	4.24e-96	Up	2.88816e-96	OPRL1	GO:0016021//integral component of membrane	GO:0004985//opioid receptor activity	GO:0050877//nervous system process;GO:0051480//regulation of cytosolic calcium ion concentration;GO:0007188//adenylate cyclase-modulating G-protein coupled receptor signaling pathway	K04216//nociceptin receptor	gi|974062106|ref|NP_001305782.1|//nociceptin receptor isoform 1x [Homo sapiens]
9750	4097	29060.3	103327	1.68601	0	Up	0	FAM65B	GO:0043231//intracellular membrane-bounded organelle;GO:0042995//cell projection;GO:0043232//intracellular non-membrane-bounded organelle	NA	GO:0048513//animal organ development;GO:0048869//cellular developmental process	K15696//RING finger protein 113B;K17985//activating molecule in BECN1-regulated autophagy protein 1;K04006//decay accelerating factor;K04460//serine/threonine-protein phosphatase 5 [EC:3.1.3.16]	gi|578812134|ref|XP_006715338.1|//PREDICTED: protein FAM65B isoform X2 [Homo sapiens];gi|119575872|gb|EAW55468.1|//chromosome 6 open reading frame 32, isoform CRA_b [Homo sapiens];gi|556695488|ref|NP_001273374.1|//protein FAM65B isoform 3 [Homo sapiens] ;gi|556695423|ref|NP_001273375.1|//protein FAM65B isoform 4 [Homo sapiens] ;gi|578812146|ref|XP_006715344.1|//PREDICTED: protein FAM65B isoform X…
6415	893	27	96	1.68599	1.9411e-09	Up	3.63719e-09	SEPW1	GO:0043231//intracellular membrane-bounded organelle	GO:0016651//oxidoreductase activity, acting on NAD(P)H;GO:0005488//binding	GO:0019725//cellular homeostasis	NA	gi|795116389|ref|XP_011782063.1|//PREDICTED: uncharacterized protein LOC105500977 [Colobus angolensis palliatus]
8543	5415	242	860	1.68524	1.21368e-69	Up	9.61442e-70	LMO4	GO:0043234//protein complex	GO:0005515//protein binding;GO:0046914//transition metal ion binding;GO:0001071//null	GO:0014020//primary neural tube formation;GO:0006357//regulation of transcription from RNA polymerase II promoter	K15612//rhombotin-2	gi|528758424|gb|EPY78083.1|//hypothetical protein CB1_001121003 [Camelus ferus]
10225	4481	177.93	631.1	1.68247	1.64383e-51	Up	1.50406e-51	CD96	GO:0016021//integral component of membrane	NA	GO:0002682//regulation of immune system process;GO:0009987//cellular process	K06517//CD96 antigen	gi|578806981|ref|XP_006713533.1|//PREDICTED: T-cell surface protein tactile isoform X2 [Homo sapiens];gi|5032141|ref|NP_005807.1|//T-cell surface protein tactile isoform 2 precursor [Homo sapiens];gi|974141134|ref|NP_001305818.1|//T-cell surface protein tactile isoform 3 [Homo sapiens];gi|38683840|ref|NP_937839.1|//T-cell surface protein tactile isoform 1 precursor [Homo sapiens]
2280	1620	6446	22858	1.68214	0	Up	0	FKBP1A	GO:0005789//endoplasmic reticulum membrane;GO:0016529//sarcoplasmic reticulum;GO:0043005//neuron projection	GO:0005527//macrolide binding;GO:0016859//cis-trans isomerase activity;GO:0004675//transmembrane receptor protein serine/threonine kinase activity;GO:0005160//transforming growth factor beta receptor binding;GO:0032403//protein complex binding	GO:0018193//peptidyl-amino acid modification;GO:0006457//protein folding;GO:0042987//amyloid precursor protein catabolic process;GO:0043393//regulation of protein binding;GO:0016567//protein ubiquitination;GO:0032924//activin receptor signaling pathway;GO:0055008//cardiac muscle tissue morphogenesis;GO:0060343//trabecula formation;GO:0002682//regulation of immune system process;GO:0007249//I-kapp…	K09568//FK506-binding protein 1 [EC:5.2.1.8]	gi|315139020|ref|NP_001186715.1|//peptidyl-prolyl cis-trans isomerase FKBP1A isoform b [Homo sapiens];gi|111601559|gb|AAI19733.1|//FKBP1A protein [Homo sapiens]
9235	1070	771.21	2733.97	1.68172	1.86894e-216	Up	8.15098e-217	IL32	GO:0044421//extracellular region part	GO:0005102//receptor binding	GO:0002376//immune system process;GO:0006950//response to stress;GO:0009987//cellular process	NA	gi|61658636|ref|NP_001012652.1|//interleukin-32 isoform C [Homo sapiens];gi|61658640|ref|NP_001012654.1|//interleukin-32 isoform D [Homo sapiens];gi|815890841|ref|NP_001295007.1|//interleukin-32 isoform E precursor [Homo sapiens];gi|61639466|ref|NP_001012649.1|//interleukin-32 isoform B [Homo sapiens];gi|61658634|ref|NP_001012651.1|//interleukin-32 isoform A [Homo sapiens]
64863	3704	187	662	1.67971	8.13276e-54	Up	7.2904e-54	METTL4	NA	GO:0016741//transferase activity, transferring one-carbon groups;GO:0005488//binding	GO:0034641//cellular nitrogen compound metabolic process	NA	gi|145275206|ref|NP_073751.3|//methyltransferase-like protein 4 isoform 1 [Homo sapiens]
2999	987	78.06	276.31	1.67955	1.39727e-23	Up	1.82227e-23	GZMH	GO:0044424//intracellular part	GO:0004175//endopeptidase activity;GO:0016787//hydrolase activity	GO:0019538//protein metabolic process;GO:0012501//programmed cell death	K01353//granzyme B [EC:3.4.21.79];K09616//granzyme H (cathepsin G-like 2) [EC:3.4.21.-]	gi|399124765|ref|NP_001257709.1|//granzyme H isoform 2 precursor [Homo sapiens];gi|15529990|ref|NP_219491.1|//granzyme H isoform 1 preproprotein [Homo sapiens];gi|399124767|ref|NP_001257710.1|//granzyme H isoform 3 precursor [Homo sapiens]
6347	760	13	46	1.67904	2.02382e-05	Up	4.65947e-05	CCL2	GO:0044421//extracellular region part;GO:0044424//intracellular part;GO:0044297//cell body	GO:0005125//cytokine activity;GO:0060089//molecular transducer activity;GO:0016301//kinase activity;GO:0005539//glycosaminoglycan binding;GO:0048020//CCR chemokine receptor binding	GO:0050863//regulation of T cell activation;GO:0001101//response to acid chemical;GO:0032496//response to lipopolysaccharide;GO:0050804//modulation of chemical synaptic transmission;GO:0019058//viral life cycle;GO:0072683//T cell extravasation;GO:0007169//transmembrane receptor protein tyrosine kinase signaling pathway;GO:0008347//glial cell migration;GO:0070555//response to interleukin-1;GO:0034…	K14624//C-C motif chemokine 2	gi|635089123|ref|XP_008009200.1|//PREDICTED: C-C motif chemokine 2 [Chlorocebus sabaeus]
1353	2509	13	46	1.67904	2.02382e-05	Up	4.65947e-05	COX11	GO:0031224//intrinsic component of membrane;GO:0043231//intracellular membrane-bounded organelle;GO:0019866//organelle inner membrane	GO:0046914//transition metal ion binding;GO:0015002//heme-copper terminal oxidase activity	GO:0032501//multicellular organismal process;GO:0043623//cellular protein complex assembly	K02258//cytochrome c oxidase assembly protein subunit 11	gi|242247061|ref|NP_001156334.1|//cytochrome c oxidase assembly protein COX11, mitochondrial isoform 3 [Homo sapiens];gi|242247057|ref|NP_001156333.1|//cytochrome c oxidase assembly protein COX11, mitochondrial isoform 2 [Homo sapiens];gi|194379972|dbj|BAG58338.1|//unnamed protein product [Homo sapiens];gi|4758034|ref|NP_004366.1|//cytochrome c oxidase assembly protein COX11, mitochondrial isofor…
2992	1993	605	2763	2.04714	5.95288e-285	Up	2.20311e-285	GYG1	GO:0044444//cytoplasmic part	GO:0043169//cation binding;GO:0048029//monosaccharide binding;GO:0035251//UDP-glucosyltransferase activity	GO:0005977//glycogen metabolic process;GO:0019318//hexose metabolic process	K00750//glycogenin [EC:2.4.1.186]	gi|926683995|ref|XP_013821305.1|//PREDICTED: glycogenin-1 isoform X1 [Capra hircus];gi|296040507|ref|NP_001171650.1|//glycogenin-1 isoform 3 [Homo sapiens];gi|926683997|ref|XP_013821310.1|//PREDICTED: glycogenin-1 isoform X2 [Capra hircus]
11266	1283	56	198	1.67792	2.06697e-17	Up	3.05812e-17	DUSP12	GO:0043231//intracellular membrane-bounded organelle	GO:0004721//phosphoprotein phosphatase activity;GO:0046914//transition metal ion binding;GO:0019899//enzyme binding	GO:0033131//regulation of glucokinase activity;GO:0006464//cellular protein modification process	K14819//dual specificity phosphatase 12 [EC:3.1.3.16 3.1.3.48]	gi|119611098|gb|EAW90692.1|//dual specificity phosphatase 12 [Homo sapiens]
3198	2461	178	629	1.6771	4.02504e-51	Up	3.69297e-51	HOXA1	GO:0043231//intracellular membrane-bounded organelle	GO:0003677//DNA binding;GO:0001071//null	GO:0042471//ear morphogenesis;GO:0006357//regulation of transcription from RNA polymerase II promoter;GO:0003002//regionalization;GO:0021548//pons development;GO:0007411//axon guidance;GO:0021604//cranial nerve structural organization;GO:0021546//rhombomere development	K09301//homeobox protein HoxA/B/D1	gi|5031761|ref|NP_005513.1|//homeobox protein Hox-A1 isoform a [Homo sapiens];gi|676277392|gb|KFO31529.1|//Homeobox protein Hox-A1 [Fukomys damarensis]
3101	3080	1918	6578	1.63396	0	Up	0	HK3	GO:0032991//macromolecular complex;GO:0043231//intracellular membrane-bounded organelle;GO:0044444//cytoplasmic part	GO:0005515//protein binding;GO:0032559//adenyl ribonucleotide binding;GO:0004396//hexokinase activity	GO:0006007//glucose catabolic process;GO:0008645//hexose transport	K00844//hexokinase [EC:2.7.1.1]	gi|675688454|ref|XP_008956368.1|//PREDICTED: hexokinase-3 isoform X3 [Pan paniscus]
9540	1466	69.62	245.75	1.67553	4.05803e-21	Up	5.55464e-21	TP53I3	NA	GO:0050661//NADP binding;GO:0042802//identical protein binding;GO:0046914//transition metal ion binding;GO:0016655//oxidoreductase activity, acting on NAD(P)H, quinone or similar compound as acceptor	GO:0046496//nicotinamide nucleotide metabolic process	K10133//tumor protein p53-inducible protein 3 [EC:1.-.-.-]	gi|332164791|ref|NP_001193731.1|//quinone oxidoreductase PIG3 isoform 2 [Homo sapiens];gi|119390448|pdb|2J8Z|A//Chain A, Crystal Structure Of Human P53 Inducible Oxidoreductase ( Tp53i3,Pig3)
57700	4606	1631	5755	1.67497	0	Up	0	FAM160B1	NA	NA	NA	NA	gi|205277429|ref|NP_001128523.1|//protein FAM160B1 isoform b [Homo sapiens];gi|205277427|ref|NP_065991.3|//protein FAM160B1 isoform a [Homo sapiens]
285343	3104	120.65	424.66	1.67139	5.48123e-35	Up	6.05024e-35	TCAIM	GO:0043231//intracellular membrane-bounded organelle	NA	NA	NA	gi|795463182|ref|XP_011889429.1|//PREDICTED: T-cell activation inhibitor, mitochondrial isoform X1 [Cercocebus atys];gi|820982369|ref|XP_012366479.1|//PREDICTED: T-cell activation inhibitor, mitochondrial isoform X1 [Nomascus leucogenys];gi|795463187|ref|XP_011889430.1|//PREDICTED: T-cell activation inhibitor, mitochondrial isoform X2 [Cercocebus atys]
7673	1680	81.93	288.14	1.67022	2.48054e-24	Up	3.19601e-24	ZNF222	GO:0043231//intracellular membrane-bounded organelle	GO:0046914//transition metal ion binding;GO:0003676//nucleic acid binding	GO:0006351//transcription, DNA-templated	K09228//KRAB domain-containing zinc finger protein	gi|194097339|ref|NP_001123468.1|//zinc finger protein 222 isoform 1 [Homo sapiens];gi|194018453|ref|NP_037492.2|//zinc finger protein 222 isoform 2 [Homo sapiens]
10333	5891	5719.23	20072.8	1.66726	0	Up	0	TLR6	GO:0043234//protein complex;GO:0030666//endocytic vesicle membrane;GO:0016021//integral component of membrane	GO:0071723//lipopeptide binding;GO:0004872//receptor activity;GO:0046983//protein dimerization activity	GO:0071221//cellular response to bacterial lipopeptide;GO:0007249//I-kappaB kinase/NF-kappaB signaling;GO:0043406//positive regulation of MAP kinase activity;GO:0002460//adaptive immune response based on somatic recombination of immune receptors built from immunoglobulin superfamily domains;GO:0042108//positive regulation of cytokine biosynthetic process;GO:0007166//cell surface receptor signalin…	K10169//toll-like receptor 6	gi|20143971|ref|NP_006059.2|//toll-like receptor 6 precursor [Homo sapiens]
5229	2727	217	761	1.66612	6.86646e-61	Up	5.82337e-61	PGGT1B	GO:0043234//protein complex	GO:0008289//lipid binding;GO:0004661//protein geranylgeranyltransferase activity;GO:0046914//transition metal ion binding	GO:0008283//cell proliferation;GO:0018342//protein prenylation;GO:0010033//response to organic substance;GO:0010558//negative regulation of macromolecule biosynthetic process;GO:0051726//regulation of cell cycle	K11713//geranylgeranyl transferase type-1 subunit beta [EC:2.5.1.59]	gi|675785423|ref|XP_008950314.1|//PREDICTED: geranylgeranyl transferase type-1 subunit beta isoform X2 [Pan paniscus]
23761	2693	2958	10368.8	1.66546	0	Up	0	PISD	GO:0043231//intracellular membrane-bounded organelle	GO:0016831//carboxy-lyase activity	GO:0006644//phospholipid metabolic process	K01613//phosphatidylserine decarboxylase [EC:4.1.1.65]	gi|432105174|gb|ELK31543.1|//Phosphatidylserine decarboxylase proenzyme [Myotis davidii];gi|989888580|ref|XP_006905000.2|//PREDICTED: phosphatidylserine decarboxylase proenzyme isoform X1 [Pteropus alecto];gi|311033492|sp|Q9UG56.4|PISD_HUMAN//RecName: Full=Phosphatidylserine decarboxylase proenzyme, mitochondrial; Contains: RecName: Full=Phosphatidylserine decarboxylase beta chain; Contains: RecN…
55803	2757	47.21	165.27	1.66357	1.10603e-14	Up	1.74735e-14	ADAP2	GO:0016020//membrane;GO:0031967//organelle envelope	GO:0005515//protein binding;GO:0046914//transition metal ion binding;GO:0043178//alcohol binding;GO:0008047//enzyme activator activity;GO:0035091//phosphatidylinositol binding	GO:0048513//animal organ development;GO:0032012//regulation of ARF protein signal transduction	K12486//stromal membrane-associated protein	gi|21707306|gb|AAH33758.1|//ArfGAP with dual PH domains 2 [Homo sapiens];gi|578831135|ref|XP_006722036.1|//PREDICTED: arf-GAP with dual PH domain-containing protein 2 isoform X5 [Homo sapiens];gi|8923763|ref|NP_060874.1|//arf-GAP with dual PH domain-containing protein 2 [Homo sapiens];gi|82791243|gb|ABB90599.1|//centaurin alpha 2 [Homo sapiens]
51266	910	18	63	1.66327	1.03454e-06	Up	2.20508e-06	CLEC1B	GO:0016021//integral component of membrane	GO:0030246//carbohydrate binding;GO:0004872//receptor activity	GO:0007165//signal transduction;GO:0006950//response to stress	K10070//C-type lectin domain family 1 member B	gi|153252048|ref|NP_001092901.1|//C-type lectin domain family 1 member B isoform b [Homo sapiens] ;gi|153252029|ref|NP_057593.3|//C-type lectin domain family 1 member B isoform a [Homo sapiens]
10322	2585	12	42	1.66327	4.69415e-05	Up	0.000111082	SMYD5	NA	GO:0043169//cation binding	NA	K11426//SET and MYND domain-containing protein	gi|154689858|ref|NP_006053.2|//SET and MYND domain-containing protein 5 [Homo sapiens]
100506164	1955	10	35	1.66327	0.000170121	Up	0.0004183	HSFX1	GO:0043231//intracellular membrane-bounded organelle	GO:0003677//DNA binding;GO:0001071//null	GO:0006351//transcription, DNA-templated	K09416//heat shock transcription factor 3;K09414//heat shock transcription factor 1;K15694//RING finger protein 43 [EC:2.3.2.27];K16482//centriolar protein POC1	gi|7706603|ref|NP_057237.1|//heat shock transcription factor, X-linked [Homo sapiens]
6097	3054	8	28	1.66327	0.000621535	Up	0.00160074	RORC	GO:0031981//nuclear lumen	GO:0003677//DNA binding;GO:0046914//transition metal ion binding;GO:0004879//nuclear receptor activity;GO:0001071//null	GO:0006464//cellular protein modification process;GO:0030217//T cell differentiation;GO:0009755//hormone-mediated signaling pathway;GO:0048511//rhythmic process	K08534//RAR-related orphan receptor gamma	gi|758420|gb|AAA64751.1|//ROR gamma [Homo sapiens]
6059	4191	23.35	81.61	1.66124	3.70071e-08	Up	7.32741e-08	ABCE1	GO:0043231//intracellular membrane-bounded organelle	GO:0032559//adenyl ribonucleotide binding;GO:0004857//enzyme inhibitor activity;GO:0017111//nucleoside-triphosphatase activity;GO:0051540//metal cluster binding	GO:0016070//RNA metabolic process;GO:0051707//response to other organism;GO:0009207//purine ribonucleoside triphosphate catabolic process	K06174//ATP-binding cassette, sub-family E, member 1	gi|532083745|ref|XP_005327610.1|//PREDICTED: ATP-binding cassette sub-family E member 1 [Ictidomys tridecemlineatus]
56829	6599	5864.64	20484.3	1.66032	0	Up	0	ZC3HAV1	GO:0043231//intracellular membrane-bounded organelle	GO:0016763//transferase activity, transferring pentosyl groups;GO:0046914//transition metal ion binding;GO:0003676//nucleic acid binding	GO:0051707//response to other organism	K15259//poly [ADP-ribose] polymerase 7/11/12/13 [EC:2.4.2.30]	gi|27477138|ref|NP_078901.3|//zinc finger CCCH-type antiviral protein 1 isoform 2 [Homo sapiens];gi|27477136|ref|NP_064504.2|//zinc finger CCCH-type antiviral protein 1 isoform 1 [Homo sapiens]
2256	2914	47	164	1.65888	1.56051e-14	Up	2.47675e-14	FGF11	NA	GO:0005102//receptor binding	GO:0023052//signaling;GO:0007154//cell communication;GO:0048731//system development	K04358//fibroblast growth factor	gi|821396263|ref|XP_012389167.1|//PREDICTED: fibroblast growth factor 11-like [Orcinus orca];gi|694965886|ref|XP_009430018.1|//PREDICTED: fibroblast growth factor 11 isoform X1 [Pan troglodytes];gi|4758362|ref|NP_004103.1|//fibroblast growth factor 11 isoform 1 [Homo sapiens]
3240	1459	77.42	363.67	2.08777	3.63266e-40	Up	3.776e-40	HP	GO:0043234//protein complex	GO:0004175//endopeptidase activity;GO:0005515//protein binding	GO:0006875//cellular metal ion homeostasis;GO:0019538//protein metabolic process;GO:0043086//negative regulation of catalytic activity;GO:0008219//cell death;GO:0010727//negative regulation of hydrogen peroxide metabolic process;GO:0000302//response to reactive oxygen species	K16142//haptoglobin	gi|119579598|gb|EAW59194.1|//haptoglobin, isoform CRA_a [Homo sapiens];gi|119579601|gb|EAW59197.1|//haptoglobin, isoform CRA_d [Homo sapiens]
8427	3632	379	1321.19	1.65748	1.62945e-103	Up	1.07147e-103	ZNF282	GO:0043231//intracellular membrane-bounded organelle	GO:0046914//transition metal ion binding;GO:0003676//nucleic acid binding	GO:0006351//transcription, DNA-templated	K09228//KRAB domain-containing zinc finger protein	gi|817265736|ref|XP_012299403.1|//PREDICTED: zinc finger protein 282 [Aotus nancymaae];gi|2789430|dbj|BAA24380.1|//repressor protein [Homo sapiens]
9203	6136	27.86	97.03	1.65615	2.50709e-09	Up	4.72169e-09	ZMYM3	GO:0043231//intracellular membrane-bounded organelle	GO:0046914//transition metal ion binding;GO:0003676//nucleic acid binding	GO:0032501//multicellular organismal process	NA	gi|283837894|ref|NP_001164633.1|//zinc finger MYM-type protein 3 isoform 2 [Homo sapiens];gi|795169942|ref|XP_011798480.1|//PREDICTED: zinc finger MYM-type protein 3 isoform X1 [Colobus angolensis palliatus]
8530	940	5605	19507	1.65512	0	Up	0	CST7	GO:0044424//intracellular part	GO:0004866//endopeptidase inhibitor activity	GO:0010466//negative regulation of peptidase activity;GO:0002376//immune system process	K13903//cystatin-F	gi|3986157|dbj|BAA34941.1|//human CMAP [Homo sapiens]
10123	4024	328.26	1142	1.65457	1.60705e-89	Up	1.1308e-89	ARL4C	GO:0016020//membrane;GO:0043231//intracellular membrane-bounded organelle;GO:0042995//cell projection	GO:0015631//tubulin binding;GO:0032561//guanyl ribonucleotide binding;GO:0017111//nucleoside-triphosphatase activity	GO:0016197//endosomal transport;GO:0035556//intracellular signal transduction;GO:0009207//purine ribonucleoside triphosphate catabolic process	K07945//ADP-ribosylation factor-like protein 4	gi|795137195|ref|XP_011835669.1|//PREDICTED: ADP-ribosylation factor-like protein 4C [Mandrillus leucophaeus];gi|426338986|ref|XP_004033447.1|//PREDICTED: uncharacterized protein LOC101151990 [Gorilla gorilla gorilla]
285346	1970	44.36	154.31	1.65441	9.74116e-14	Up	1.57974e-13	ZNF852	GO:0043231//intracellular membrane-bounded organelle	GO:0046914//transition metal ion binding;GO:0001071//null;GO:0003676//nucleic acid binding	GO:0006351//transcription, DNA-templated	K09228//KRAB domain-containing zinc finger protein;K09229//KRAB and SCAN domains-containing zinc finger protein	gi|565324141|ref|NP_001274278.1|//zinc finger protein 852 [Homo sapiens]
921	3180	140	487	1.65441	2.71098e-39	Up	2.84462e-39	CD5	GO:0009986//cell surface;GO:0016021//integral component of membrane	GO:0005515//protein binding;GO:0004888//transmembrane signaling receptor activity	GO:0031294//lymphocyte costimulation	K06455//T-cell surface glycoprotein CD5	gi|166197668|ref|NP_055022.2|//T-cell surface glycoprotein CD5 precursor [Homo sapiens]
10526	5365	366	1271	1.65196	3.41633e-99	Up	2.29254e-99	IPO8	GO:0043231//intracellular membrane-bounded organelle	GO:0022892//null;GO:0005049//nuclear export signal receptor activity;GO:0017016//Ras GTPase binding	GO:0023052//signaling;GO:0015031//protein transport	K18755//importin-8	gi|53759103|ref|NP_006381.2|//importin-8 isoform 1 [Homo sapiens];gi|300360505|ref|NP_001177924.1|//importin-8 isoform 2 [Homo sapiens]
3717	5048	1681.26	5838.08	1.65187	0	Up	0	JAK2	GO:0044459//plasma membrane part;GO:0034399//nuclear periphery;GO:0043232//intracellular non-membrane-bounded organelle;GO:0044444//cytoplasmic part	GO:0019904//protein domain specific binding;GO:0032559//adenyl ribonucleotide binding;GO:0035400//histone tyrosine kinase activity;GO:0051427//hormone receptor binding;GO:0005506//iron ion binding;GO:0019900//kinase binding;GO:0005126//cytokine receptor binding	GO:0016477//cell migration;GO:0007162//negative regulation of cell adhesion;GO:0009888//tissue development;GO:0042503//null;GO:0030099//myeloid cell differentiation;GO:0000060//protein import into nucleus, translocation;GO:0051480//regulation of cytosolic calcium ion concentration;GO:0050796//regulation of insulin secretion;GO:0032611//interleukin-1 beta production;GO:0001959//regulation of cytok…	K04447//Janus kinase 2 [EC:2.7.10.2]	gi|4826776|ref|NP_004963.1|//tyrosine-protein kinase JAK2 [Homo sapiens]
84433	4432	91	315	1.64733	6.01867e-26	Up	7.57876e-26	CARD11	GO:0044425//membrane part;GO:0044444//cytoplasmic part;GO:0043235//receptor complex	GO:0019904//protein domain specific binding;GO:0016776//phosphotransferase activity, phosphate group as acceptor	GO:0030888//regulation of B cell proliferation;GO:0042108//positive regulation of cytokine biosynthetic process;GO:0006915//apoptotic process;GO:0045058//T cell selection;GO:0042098//T cell proliferation;GO:0051091//positive regulation of DNA binding transcription factor activity;GO:0007249//I-kappaB kinase/NF-kappaB signaling;GO:0031294//lymphocyte costimulation;GO:0050851//antigen receptor-medi…	K07367//caspase recruitment domain-containing protein 11	gi|157743265|ref|NP_115791.3|//caspase recruitment domain-containing protein 11 [Homo sapiens]
2833	1670	13	45	1.64733	3.03742e-05	Up	7.08872e-05	CXCR3	GO:0044424//intracellular part;GO:0016021//integral component of membrane	GO:0004950//chemokine receptor activity	GO:0042221//response to chemical;GO:0007166//cell surface receptor signaling pathway;GO:0051480//regulation of cytosolic calcium ion concentration	K04188//C-X-C chemokine receptor type 3	gi|694985279|ref|XP_009437529.1|//PREDICTED: C-X-C chemokine receptor type 3 isoform X1 [Pan troglodytes];gi|4504099|ref|NP_001495.1|//C-X-C chemokine receptor type 3 isoform 1 [Homo sapiens]
54916	4278	498	1722	1.64578	5.54225e-133	Up	3.18495e-133	TMEM260	GO:0031224//intrinsic component of membrane	NA	NA	NA	gi|93277080|ref|NP_060269.3|//transmembrane protein 260 [Homo sapiens]
23621	5151	11	38	1.64441	0.000109611	Up	0.000265757	BACE1	GO:0012506//vesicle membrane;GO:0016021//integral component of membrane;GO:0043005//neuron projection;GO:0044431//Golgi apparatus part	GO:0004175//endopeptidase activity;GO:0008242//omega peptidase activity;GO:0005488//binding	GO:0009100//glycoprotein metabolic process;GO:0033619//membrane protein proteolysis	K04521//beta-site APP-cleaving enzyme 1 (memapsin 2) [EC:3.4.23.46]	gi|333755186|ref|NP_001193978.1|//beta-secretase 1 isoform F [Homo sapiens] ;gi|444524573|gb|ELV13879.1|//Beta-secretase 1 [Tupaia chinensis];gi|21040368|ref|NP_620429.1|//beta-secretase 1 isoform D precursor [Homo sapiens];gi|333440466|ref|NP_001193977.1|//beta-secretase 1 isoform E [Homo sapiens]
5536	2166	20.04	69.16	1.64297	4.22097e-07	Up	8.81418e-07	PPP5C	GO:0043231//intracellular membrane-bounded organelle;GO:0042995//cell projection;GO:0044297//cell body;GO:0044444//cytoplasmic part	GO:0043169//cation binding;GO:0060089//molecular transducer activity;GO:0004721//phosphoprotein phosphatase activity	GO:0014072//response to isoquinoline alkaloid;GO:0006464//cellular protein modification process;GO:0007249//I-kappaB kinase/NF-kappaB signaling;GO:0000087//mitotic M phase;GO:0051259//protein oligomerization	K04460//serine/threonine-protein phosphatase 5 [EC:3.1.3.16]	gi|324021716|ref|NP_001191213.1|//serine/threonine-protein phosphatase 5 isoform 2 [Homo sapiens];gi|5453958|ref|NP_006238.1|//serine/threonine-protein phosphatase 5 isoform 1 [Homo sapiens]
56302	2867	15	51.76	1.64279	9.38228e-06	Up	2.11027e-05	TRPV5	GO:0044459//plasma membrane part;GO:0016021//integral component of membrane	GO:0005261//cation channel activity	GO:0006816//calcium ion transport;GO:0051259//protein oligomerization	K04974//transient receptor potential cation channel subfamily V member 5	gi|730229359|ref|NP_062815.3|//transient receptor potential cation channel subfamily V member 5 [Homo sapiens]
145553	760	28.57	98.45	1.6408	2.45443e-09	Up	4.62045e-09	MDP1	NA	GO:0043169//cation binding;GO:0004721//phosphoprotein phosphatase activity	NA	K17619//magnesium-dependent phosphatase 1 [EC:3.1.3.48 3.1.3.-];K12194//charged multivesicular body protein 4	gi|33457311|ref|NP_612485.2|//magnesium-dependent phosphatase 1 isoform 1 [Homo sapiens];gi|315259107|ref|NP_001186750.1|//magnesium-dependent phosphatase 1 isoform 2 [Homo sapiens]
7005	3023	27	93	1.64019	6.46134e-09	Up	1.23922e-08	TEAD3	NA	NA	NA	K09448//transcriptional enhancer factor	gi|507925548|ref|XP_004674040.1|//PREDICTED: transcriptional enhancer factor TEF-5, partial [Condylura cristata]
79684	2472	9	31	1.64019	0.000399262	Up	0.00101056	MSANTD2	NA	NA	NA	K17757//ATP-dependent NAD(P)H-hydrate dehydratase [EC:4.2.1.93]	gi|189571647|ref|NP_078907.2|//myb/SANT-like DNA-binding domain-containing protein 2 isoform 1 [Homo sapiens];gi|808688290|ref|NP_001294956.1|//myb/SANT-like DNA-binding domain-containing protein 2 isoform 3 [Homo sapiens]
90480	772	9	31	1.64019	0.000399262	Up	0.00101056	GADD45GIP1	NA	GO:0005488//binding	NA	NA	gi|635036440|ref|XP_007993646.1|//PREDICTED: growth arrest and DNA damage-inducible proteins-interacting protein 1 [Chlorocebus sabaeus]
51621	6839	8958	30830	1.639	0	Up	0	KLF13	GO:0005622//intracellular	GO:0046872//metal ion binding;GO:0003676//nucleic acid binding	GO:0006357//regulation of transcription from RNA polymerase II promoter	K09208//krueppel-like factor 9/13/14/16	gi|37693995|ref|NP_057079.2|//Krueppel-like factor 13 isoform 1 [Homo sapiens];gi|698320875|ref|NP_001289390.1|//Krueppel-like factor 13 isoform 2 [Homo sapiens]
166012	1792	160	550	1.63727	1.68346e-43	Up	1.67893e-43	CHST13	GO:0031224//intrinsic component of membrane;GO:0043231//intracellular membrane-bounded organelle;GO:0012505//endomembrane system	GO:0034481//chondroitin sulfotransferase activity	GO:0006024//glycosaminoglycan biosynthetic process	K07779//chondroitin 4-sulfotransferase 13 [EC:2.8.2.5]	gi|23097238|ref|NP_690849.1|//carbohydrate sulfotransferase 13 precursor [Homo sapiens]
7039	4337	1279	4396	1.63709	0	Up	0	TGFA	GO:0031224//intrinsic component of membrane;GO:0016020//membrane;GO:0044421//extracellular region part	GO:0070851//growth factor receptor binding;GO:0004712//protein serine/threonine/tyrosine kinase activity;GO:0060089//molecular transducer activity	GO:0007176//regulation of epidermal growth factor-activated receptor activity;GO:0000165//MAPK cascade;GO:0008284//positive regulation of cell proliferation;GO:0007088//regulation of mitotic nuclear division	K08774//transforming growth factor, alpha	gi|815890946|ref|NP_001295087.1|//protransforming growth factor alpha isoform 3 precursor [Homo sapiens] ;gi|634846246|ref|XP_007938333.1|//PREDICTED: protransforming growth factor alpha [Orycteropus afer afer];gi|815890948|ref|NP_001295088.1|//protransforming growth factor alpha isoform 4 precursor [Homo sapiens]
3303	2445	8398.48	30125.2	1.69868	0	Up	0	HSPA1A	GO:0032991//macromolecular complex;GO:0016604//nuclear body;GO:0044444//cytoplasmic part	GO:0032559//adenyl ribonucleotide binding;GO:0019899//enzyme binding	GO:0006401//RNA catabolic process;GO:0006457//protein folding;GO:0008283//cell proliferation;GO:0006950//response to stress;GO:0043066//negative regulation of apoptotic process;GO:0016049//cell growth	K03283//heat shock 70kDa protein 1/8	gi|62089222|dbj|BAD93055.1|//heat shock 70kDa protein 1A variant [Homo sapiens]
84660	3228	14	48	1.63352	1.96616e-05	Up	4.52396e-05	CCDC62	GO:0043231//intracellular membrane-bounded organelle	NA	NA	K11498//centromeric protein E;K20283//golgin subfamily A member 4	gi|75677376|ref|NP_958843.2|//coiled-coil domain-containing protein 62 [Homo sapiens];gi|30060228|gb|AAP13075.1|//aaa-protein [Homo sapiens]
124045	1564	14	48	1.63352	1.96616e-05	Up	4.52396e-05	SPATA33	NA	NA	NA	K06236//collagen, type I, alpha;K19721//collagen, type V/XI/XXIV/XXVII, alpha;K02449//cyclin-dependent kinase 10 [EC:2.7.11.22]	gi|578828823|ref|XP_006721196.1|//PREDICTED: spermatogenesis-associated protein 33 isoform X1 [Homo sapiens];gi|635034489|ref|XP_007992597.1|//PREDICTED: spermatogenesis-associated protein 33 isoform X1 [Chlorocebus sabaeus];gi|429325235|ref|NP_001258836.1|//spermatogenesis-associated protein 33 isoform a [Homo sapiens] ;gi|820975718|ref|XP_012360768.1|//PREDICTED: spermatogenesis-associated prot…
53840	2208	310.41	1063.78	1.63287	5.34523e-82	Up	3.93091e-82	TRIM34	GO:0044424//intracellular part	GO:0046914//transition metal ion binding	GO:0051259//protein oligomerization	K11999//tripartite motif-containing protein 6/22/34	gi|11022690|dbj|BAB17050.1|//interferon-responsive finger protein 1 long form [Homo sapiens]
7227	10017	139	476	1.63179	9.75009e-38	Up	1.0417e-37	TRPS1	GO:0043231//intracellular membrane-bounded organelle	GO:0003677//DNA binding;GO:0046914//transition metal ion binding;GO:0001071//null	GO:0002062//chondrocyte differentiation;GO:0006357//regulation of transcription from RNA polymerase II promoter;GO:0006606//protein import into nucleus	K09220//IKAROS family zinc finger protein	gi|90652851|ref|NP_054831.2|//zinc finger transcription factor Trps1 isoform 1 [Homo sapiens];gi|544710995|ref|NP_001269831.1|//zinc finger transcription factor Trps1 isoform 2 [Homo sapiens];gi|544711007|ref|NP_001269832.1|//zinc finger transcription factor Trps1 isoform 3 [Homo sapiens]
7514	4830	639	2186.03	1.63034	4.73729e-166	Up	2.40686e-166	XPO1	GO:0032991//macromolecular complex;GO:0042175//nuclear outer membrane-endoplasmic reticulum membrane network;GO:0016604//nuclear body;GO:0044444//cytoplasmic part;GO:0000775//chromosome, centromeric region	GO:0022892//null;GO:0003676//nucleic acid binding	GO:0050658//RNA transport;GO:0016070//RNA metabolic process;GO:0015031//protein transport;GO:0051704//multi-organism process;GO:0007067//null	K14290//exportin-1	gi|4507943|ref|NP_003391.1|//exportin-1 [Homo sapiens]
63901	3837	1010.21	3453.62	1.62937	5.85155e-261	Up	2.28071e-261	FAM111A	NA	GO:0004175//endopeptidase activity	GO:0019538//protein metabolic process	K09228//KRAB domain-containing zinc finger protein;K12581//CCR4-NOT transcription complex subunit 7/8;K01368//cathepsin S [EC:3.4.22.27];K01064//wingless-type MMTV integration site family, member 9	gi|694988656|ref|XP_009438730.1|//PREDICTED: protein FAM111A isoform X1 [Pan troglodytes];gi|38505209|ref|NP_071357.2|//protein FAM111A [Homo sapiens]
8082	4364	12	41	1.6285	7.05025e-05	Up	0.000168897	SSPN	GO:0044459//plasma membrane part;GO:0043234//protein complex;GO:0016021//integral component of membrane;GO:0016023//null	NA	GO:0003012//muscle system process;GO:0009987//cellular process	NA	gi|16933561|ref|NP_005077.2|//sarcospan isoform 1 [Homo sapiens]
81788	3466	8252.47	28192.8	1.62834	0	Up	0	NUAK2	NA	GO:0046872//metal ion binding;GO:0032559//adenyl ribonucleotide binding;GO:0004672//protein kinase activity	GO:0006464//cellular protein modification process;GO:0009267//cellular response to starvation;GO:0007010//cytoskeleton organization;GO:0006915//apoptotic process	K08800//NUAK family, SNF1-like kinase [EC:2.7.11.1]	gi|733214996|ref|NP_112214.2|//NUAK family SNF1-like kinase 2 [Homo sapiens]
5977	2545	1217	4157	1.62813	0	Up	0	DPF2	GO:0031981//nuclear lumen;GO:0005815//microtubule organizing center	GO:0046914//transition metal ion binding	NA	K13196//zinc finger protein ubi-d4	gi|675790471|ref|XP_003828672.2|//PREDICTED: zinc finger protein ubi-d4 isoform X1 [Pan paniscus];gi|675790473|ref|XP_003828671.2|//PREDICTED: zinc finger protein ubi-d4 isoform X2 [Pan paniscus]
3304	2551	929.93	2745.11	1.41758	1.14121e-169	Up	5.74679e-170	HSPA1B	GO:0032991//macromolecular complex;GO:0016604//nuclear body;GO:0044444//cytoplasmic part	GO:0032559//adenyl ribonucleotide binding;GO:0019899//enzyme binding	GO:0006401//RNA catabolic process;GO:0006457//protein folding;GO:0008283//cell proliferation;GO:0006950//response to stress;GO:0043066//negative regulation of apoptotic process;GO:0016049//cell growth	K03283//heat shock 70kDa protein 1/8	gi|62089222|dbj|BAD93055.1|//heat shock 70kDa protein 1A variant [Homo sapiens]
55423	1069	28.74	98.14	1.6277	3.15824e-09	Up	5.97287e-09	SIRPG	GO:0031224//intrinsic component of membrane	GO:0005488//binding	GO:0050863//regulation of T cell activation;GO:0008283//cell proliferation;GO:0007165//signal transduction;GO:0016337//null;GO:0007154//cell communication;GO:0034330//cell junction organization;GO:0007599//hemostasis	K06551//signal-regulatory protein alpha/beta1/gamma	gi|94538337|ref|NP_543006.2|//signal-regulatory protein gamma isoform 2 precursor [Homo sapiens];gi|94538339|ref|NP_001034597.1|//signal-regulatory protein gamma isoform 3 precursor [Homo sapiens];gi|94538335|ref|NP_061026.2|//signal-regulatory protein gamma isoform 1 precursor [Homo sapiens]
10951	2258	687	2345	1.62712	1.74999e-177	Up	8.57638e-178	CBX1	GO:0015630//microtubule cytoskeleton;GO:0000775//chromosome, centromeric region;GO:0000790//nuclear chromatin;GO:0045120//pronucleus	GO:0005515//protein binding	GO:0006325//chromatin organization;GO:0006355//regulation of transcription, DNA-templated	K11585//chromobox protein 1	gi|675660465|ref|XP_002748531.2|//PREDICTED: chromobox protein homolog 1 [Callithrix jacchus]
10791	694	97	331	1.62669	1.02455e-26	Up	1.27458e-26	VAMP5	GO:0016021//integral component of membrane;GO:0044431//Golgi apparatus part	NA	GO:0006810//transport;GO:0014706//striated muscle tissue development;GO:0048513//animal organ development;GO:0048869//cellular developmental process	K08514//vesicle-associated membrane protein 5	gi|5730112|ref|NP_006625.1|//vesicle-associated membrane protein 5 [Homo sapiens]
642517	2387	71.65	244.04	1.62399	3.74281e-20	Up	5.25148e-20	AGAP9	NA	GO:0046914//transition metal ion binding	GO:0032012//regulation of ARF protein signal transduction	K12491//Arf-GAP with GTPase, ANK repeat and PH domain-containing protein 1/3	gi|299829259|ref|NP_001177739.1|//arf-GAP with GTPase, ANK repeat and PH domain-containing protein 9 [Homo sapiens]
2534	3137	173	589	1.62341	6.59487e-46	Up	6.41587e-46	FYN	GO:0043231//intracellular membrane-bounded organelle;GO:0016020//membrane;GO:0044444//cytoplasmic part	GO:0043169//cation binding;GO:0004713//protein tyrosine kinase activity;GO:0005515//protein binding;GO:0008092//cytoskeletal protein binding;GO:0051427//hormone receptor binding;GO:0032559//adenyl ribonucleotide binding;GO:0019900//kinase binding	GO:0016477//cell migration;GO:0035556//intracellular signal transduction;GO:0007420//brain development;GO:0031294//lymphocyte costimulation;GO:0006935//chemotaxis;GO:0007599//hemostasis;GO:0007611//learning or memory;GO:0007215//glutamate receptor signaling pathway;GO:0050688//regulation of defense response to virus;GO:0006468//protein phosphorylation;GO:0032870//cellular response to hormone stim…	K05703//tyrosine-protein kinase Fyn [EC:2.7.10.2]	gi|23510362|ref|NP_694592.1|//tyrosine-protein kinase Fyn isoform b [Homo sapiens];gi|564398139|ref|XP_006256584.1|//PREDICTED: tyrosine-protein kinase Fyn isoform X3 [Rattus norvegicus];gi|23510364|ref|NP_694593.1|//tyrosine-protein kinase Fyn isoform c [Homo sapiens]
55601	6099	845.05	2874.61	1.62217	3.54363e-216	Up	1.54747e-216	DDX60	NA	GO:0032559//adenyl ribonucleotide binding;GO:0042623//ATPase activity, coupled;GO:0003676//nucleic acid binding	NA	K20103//ATP-dependent RNA helicase DDX60 [EC:3.6.4.13]	gi|222831595|ref|NP_060101.3|//probable ATP-dependent RNA helicase DDX60 [Homo sapiens]
23483	1970	10	34	1.62145	0.000256073	Up	0.000638494	TGDS	NA	GO:0016836//hydro-lyase activity;GO:0048037//cofactor binding	GO:0008152//metabolic process	K01710//dTDP-glucose 4,6-dehydratase [EC:4.2.1.46]	gi|829791301|ref|XP_012625203.1|//PREDICTED: dTDP-D-glucose 4,6-dehydratase isoform X2 [Microcebus murinus];gi|7657641|ref|NP_055120.1|//dTDP-D-glucose 4,6-dehydratase isoform 1 [Homo sapiens]
160897	8895	10	34	1.62145	0.000256073	Up	0.000638494	GPR180	GO:0031224//intrinsic component of membrane	NA	NA	NA	gi|332216595|ref|XP_003257438.1|//PREDICTED: integral membrane protein GPR180 [Nomascus leucogenys]
4255	1372	10	34	1.62145	0.000256073	Up	0.000638494	MGMT	NA	NA	NA	K00567//methylated-DNA-[protein]-cysteine S-methyltransferase [EC:2.1.1.63]	gi|197304670|ref|NP_002403.2|//methylated-DNA--protein-cysteine methyltransferase [Homo sapiens]
6618	1561	113	384	1.6207	1.55387e-30	Up	1.82564e-30	SNAPC2	GO:0031981//nuclear lumen	GO:0001071//null	GO:0006351//transcription, DNA-templated	K15209//snRNA-activating protein complex subunit 2	gi|685622577|ref|XP_009198159.1|//PREDICTED: snRNA-activating protein complex subunit 2 isoform X2 [Papio anubis];gi|4507103|ref|NP_003074.1|//snRNA-activating protein complex subunit 2 [Homo sapiens]
55924	5937	8822.67	29925.5	1.618	0	Up	0	FAM212B	NA	NA	NA	K12581//CCR4-NOT transcription complex subunit 7/8;K17985//activating molecule in BECN1-regulated autophagy protein 1	gi|39545575|ref|NP_945120.1|//protein FAM212B isoform 2 [Homo sapiens] ;gi|9506861|ref|NP_061972.1|//protein FAM212B isoform 1 [Homo sapiens]
55106	2481	49.17	166.69	1.61723	2.79684e-14	Up	4.46493e-14	SLFN12	NA	GO:0032559//adenyl ribonucleotide binding	NA	NA	gi|157388955|ref|NP_060512.3|//schlafen family member 12 [Homo sapiens]
84078	3185	151.26	512.63	1.6168	5.51696e-40	Up	5.7455e-40	KBTBD7	NA	GO:0005488//binding	NA	K10474//kelch repeat and BTB domain-containing protein 6/7	gi|21359972|ref|NP_115514.2|//kelch repeat and BTB domain-containing protein 7 [Homo sapiens]
57567	4221	2310	7826	1.6163	0	Up	0	ZNF319	NA	GO:0005488//binding	NA	K09228//KRAB domain-containing zinc finger protein	gi|55741868|ref|NP_065858.1|//zinc finger protein 319 [Homo sapiens]
54930	1632	962	3259	1.61623	1.53075e-243	Up	6.25446e-244	HAUS4	GO:0005875//microtubule associated complex	NA	GO:0007051//spindle organization;GO:0000087//mitotic M phase;GO:0031023//microtubule organizing center organization	K16587//HAUS augmin-like complex subunit 4	gi|686744819|ref|XP_009247196.1|//PREDICTED: HAUS augmin-like complex subunit 4 isoform X2 [Pongo abelii];gi|28207861|emb|CAD62584.1|//unnamed protein product [Homo sapiens]
137872	1907	13	44	1.61491	4.54391e-05	Up	0.000107386	ADHFE1	GO:0044429//mitochondrial part	GO:0016614//oxidoreductase activity, acting on CH-OH group of donors;GO:0043169//cation binding	GO:0043648//dicarboxylic acid metabolic process;GO:0006818//hydrogen transport	K11173//hydroxyacid-oxoacid transhydrogenase [EC:1.1.99.24]	gi|133922590|ref|NP_653251.2|//hydroxyacid-oxoacid transhydrogenase, mitochondrial [Homo sapiens]
8875	2050	37626	127228	1.61353	0	Up	0	VNN2	GO:0031224//intrinsic component of membrane	GO:0016811//hydrolase activity, acting on carbon-nitrogen (but not peptide) bonds, in linear amides	GO:0006575//cellular modified amino acid metabolic process	K08069//pantetheine hydrolase [EC:3.5.1.92]	gi|17865814|ref|NP_004656.2|//vascular non-inflammatory molecule 2 isoform 1 precursor [Homo sapiens];gi|4128049|emb|CAA10569.1|//VNN2 protein [Homo sapiens];gi|186659479|dbj|BAG30937.1|//GPI-80 variant protein 4 [Homo sapiens];gi|953865737|ref|XP_014590916.1|//PREDICTED: pantetheinase [Equus caballus];gi|334278906|ref|NP_001229279.1|//vascular non-inflammatory molecule 2 isoform 3 precursor [Hom…
90736	1119	74	250	1.61224	2.09992e-20	Up	2.92748e-20	FAM104B	NA	NA	NA	NA	gi|119613621|gb|EAW93215.1|//chromosome X open reading frame 44, isoform CRA_a [Homo sapiens];gi|694985026|ref|XP_009437419.1|//PREDICTED: protein FAM104B isoform X1 [Pan troglodytes];gi|686766291|ref|XP_009233176.1|//PREDICTED: protein FAM104B isoform X7 [Pongo abelii];gi|119613623|gb|EAW93217.1|//chromosome X open reading frame 44, isoform CRA_c [Homo sapiens];gi|694985028|ref|XP_009437420.1|//…
84343	4108	277.24	935.75	1.6109	5.25697e-71	Up	4.12157e-71	HPS3	GO:0044424//intracellular part	NA	NA	K20190//Hermansky-Pudlak syndrome 3 protein	gi|19923642|ref|NP_115759.2|//Hermansky-Pudlak syndrome 3 protein isoform 1 [Homo sapiens];gi|815891231|ref|NP_001295187.1|//Hermansky-Pudlak syndrome 3 protein isoform 2 [Homo sapiens]
55166	1753	8	27	1.6108	0.000937208	Up	0.0024572	CENPQ	GO:0031981//nuclear lumen;GO:0044444//cytoplasmic part;GO:0044427//chromosomal part	NA	GO:0043486//histone exchange;GO:0007067//null	K11509//centromere protein Q	gi|40068061|ref|NP_060602.2|//centromere protein Q [Homo sapiens]
84727	1478	94	317	1.60966	2.6129e-25	Up	3.32397e-25	SPSB2	GO:0044424//intracellular part	GO:0005488//binding	GO:0007165//signal transduction	K10344//SPRY domain-containing SOCS box protein 2	gi|821033095|ref|XP_003273868.3|//PREDICTED: SPRY domain-containing SOCS box protein 2 [Nomascus leucogenys]
3310	2370	5946	22780	1.79369	0	Up	0	HSPA6	NA	GO:0032559//adenyl ribonucleotide binding	GO:0006950//response to stress	K03283//heat shock 70kDa protein 1/8	gi|34419635|ref|NP_002146.2|//heat shock 70 kDa protein 6 [Homo sapiens]
79415	2213	3883.46	13086.6	1.60859	0	Up	0	C17orf62	GO:0031224//intrinsic component of membrane	GO:0005488//binding	NA	K01368//cathepsin S [EC:3.4.22.27];K02927//large subunit ribosomal protein L40e;K19944//TBC1 domain family member 10;K15696//RING finger protein 113B;K17985//activating molecule in BECN1-regulated autophagy protein 1;K00844//hexokinase [EC:2.7.1.1];K09188//histone-lysine N-methyltransferase MLL3 [EC:2.1.1.43]	gi|426346297|ref|XP_004040816.1|//PREDICTED: uncharacterized protein LOC101137557 [Gorilla gorilla gorilla];gi|21748656|dbj|BAC03465.1|//FLJ00406 protein [Homo sapiens]
54682	2297	1903.18	6404.93	1.60668	0	Up	0	MANSC1	GO:0031224//intrinsic component of membrane	NA	NA	K01064//wingless-type MMTV integration site family, member 9	gi|31542650|ref|NP_060520.2|//MANSC domain-containing protein 1 precursor [Homo sapiens]
5756	3062	921	3099	1.60644	1.11902e-229	Up	4.71055e-230	TWF1	GO:0005856//cytoskeleton	GO:0008092//cytoskeletal protein binding;GO:0004672//protein kinase activity	GO:0006464//cellular protein modification process	K08870//twinfilin	gi|426372245|ref|XP_004053038.1|//PREDICTED: twinfilin-1 isoform 2 [Gorilla gorilla gorilla];gi|54673670|gb|AAH43148.2|//Twinfilin, actin-binding protein, homolog 1 (Drosophila) [Homo sapiens];gi|119578274|gb|EAW57870.1|//PTK9 protein tyrosine kinase 9, isoform CRA_c [Homo sapiens];gi|671024222|ref|XP_008702935.1|//PREDICTED: twinfilin-1 [Ursus maritimus]
154796	6514	11	37	1.60594	0.000164502	Up	0.000403791	AMOT	GO:0031224//intrinsic component of membrane;GO:0031252//cell leading edge;GO:0009986//cell surface;GO:0043296//apical junction complex;GO:0032432//actin filament bundle;GO:0016023//null	GO:0005515//protein binding;GO:0004871//signal transducer activity	GO:0007369//gastrulation;GO:0034329//cell junction assembly;GO:0030154//cell differentiation;GO:0001525//angiogenesis;GO:0008361//regulation of cell size;GO:0042221//response to chemical;GO:0010595//positive regulation of endothelial cell migration;GO:0043009//chordate embryonic development;GO:0043114//regulation of vascular permeability;GO:0001667//ameboidal-type cell migration;GO:0032233//posit…	K16819//angiomotin	gi|166064029|ref|NP_001106962.1|//angiomotin isoform 1 [Homo sapiens]
51741	2440	11	37	1.60594	0.000164502	Up	0.000403791	WWOX	GO:0043231//intracellular membrane-bounded organelle	GO:0005515//protein binding;GO:0048037//cofactor binding;GO:0003824//catalytic activity	GO:0012502//induction of programmed cell death;GO:0009887//animal organ morphogenesis;GO:0016055//Wnt signaling pathway;GO:0001503//ossification;GO:0006629//lipid metabolic process	K19329//WW domain-containing oxidoreductase	gi|18860884|ref|NP_570607.1|//WW domain-containing oxidoreductase isoform 2 [Homo sapiens];gi|7706523|ref|NP_057457.1|//WW domain-containing oxidoreductase isoform 1 [Homo sapiens];gi|441599021|ref|XP_003260030.2|//PREDICTED: WW domain-containing oxidoreductase [Nomascus leucogenys];gi|984119658|ref|XP_015351532.1|//PREDICTED: WW domain-containing oxidoreductase-like isoform X3 [Marmota marmota m…
1089	1205	2844.83	9559.46	1.6045	0	Up	0	CEACAM4	GO:0016021//integral component of membrane	NA	NA	K06499//carcinoembryonic antigen-related cell adhesion molecule	gi|670351277|dbj|BAP19118.1|//carcinoembryonic antigen-related cell adhesion molecule 4-sv2 [Homo sapiens]
1942	1590	50	168	1.60438	3.10627e-14	Up	4.9659e-14	EFNA1	GO:0016021//integral component of membrane;GO:0031225//anchored component of membrane	GO:0005102//receptor binding	GO:0007399//nervous system development;GO:0000165//MAPK cascade;GO:0007154//cell communication;GO:0003174//mitral valve development;GO:0003188//heart valve formation;GO:0003176//aortic valve development;GO:0000122//negative regulation of transcription from RNA polymerase II promoter;GO:0007169//transmembrane receptor protein tyrosine kinase signaling pathway;GO:0010769//regulation of cell morphog…	K05462//ephrin-A	gi|33359682|ref|NP_004419.2|//ephrin-A1 isoform a precursor [Homo sapiens];gi|33359680|ref|NP_872626.1|//ephrin-A1 isoform b precursor [Homo sapiens]
84803	2659	869	2919	1.60396	5.6358e-216	Up	2.46585e-216	GPAT3	GO:0031224//intrinsic component of membrane;GO:0043231//intracellular membrane-bounded organelle;GO:0031090//organelle membrane	GO:0008374//O-acyltransferase activity	GO:0006641//triglyceride metabolic process;GO:0006644//phospholipid metabolic process;GO:0009966//regulation of signal transduction	K13506//glycerol-3-phosphate O-acyltransferase 3/4 [EC:2.3.1.15]	gi|635043457|ref|XP_007997305.1|//PREDICTED: glycerol-3-phosphate acyltransferase 3 isoform X1 [Chlorocebus sabaeus]
54708	3941	797.05	2676.28	1.6034	4.36379e-198	Up	2.02089e-198	2019-03-05	GO:0031224//intrinsic component of membrane;GO:0031966//mitochondrial membrane	GO:0019787//ubiquitin-like protein transferase activity;GO:0046914//transition metal ion binding;GO:0019899//enzyme binding	GO:0033365//protein localization to organelle;GO:0016567//protein ubiquitination;GO:0000266//mitochondrial fission;GO:0007568//aging	K10660//E3 ubiquitin-protein ligase MARCH5 [EC:2.3.2.27]	gi|8923415|ref|NP_060294.1|//E3 ubiquitin-protein ligase MARCH5 [Homo sapiens]
27013	2063	1583	5315	1.60332	0	Up	0	CNPPD1	GO:0031224//intrinsic component of membrane	NA	NA	K14612//solute carrier family 23 (nucleobase transporter), member 3	gi|187607437|ref|NP_056495.3|//protein CNPPD1 [Homo sapiens]
54101	3890	51	171	1.60134	2.01976e-14	Up	3.21417e-14	RIPK4	GO:0044424//intracellular part	GO:0032559//adenyl ribonucleotide binding;GO:0004672//protein kinase activity;GO:0004871//signal transducer activity	GO:0006464//cellular protein modification process	K08848//receptor-interacting serine/threonine-protein kinase 4 [EC:2.7.11.1]	gi|41327754|ref|NP_065690.2|//receptor-interacting serine/threonine-protein kinase 4 [Homo sapiens]
133015	5990	21.89	73.36	1.60064	3.23305e-07	Up	6.71761e-07	PACRGL	NA	NA	NA	K19526//vacuolar protein sorting-associated protein 13B;K15053//charged multivesicular body protein 7;K17985//activating molecule in BECN1-regulated autophagy protein 1;K03018//DNA-directed RNA polymerase III subunit RPC1 [EC:2.7.7.6]	gi|385275098|ref|NP_001245275.1|//PACRG-like protein isoform 4 [Homo sapiens] ;gi|767929705|ref|XP_011512111.1|//PREDICTED: PACRG-like protein isoform X12 [Homo sapiens];gi|767929654|ref|XP_011512088.1|//PREDICTED: PACRG-like protein isoform X4 [Homo sapiens];gi|821028788|ref|XP_012355262.1|//PREDICTED: PACRG-like protein isoform X2 [Nomascus leucogenys]
219402	1043	217.34	727.12	1.59815	5.33348e-55	Up	4.7361e-55	MTIF3	GO:0043231//intracellular membrane-bounded organelle	GO:0008135//translation factor activity, RNA binding;GO:0043021//ribonucleoprotein complex binding	GO:0006413//translational initiation;GO:0032988//ribonucleoprotein complex disassembly	K02520//translation initiation factor IF-3	gi|261878550|ref|NP_690876.3|//translation initiation factor IF-3, mitochondrial [Homo sapiens]
8482	3331	244	816	1.5976	1.87111e-61	Up	1.57793e-61	SEMA7A	GO:0031224//intrinsic component of membrane;GO:0009986//cell surface	GO:0004871//signal transducer activity;GO:0005488//binding	GO:0007166//cell surface receptor signaling pathway;GO:0030307//positive regulation of cell growth;GO:0048731//system development;GO:0048869//cellular developmental process;GO:0043410//positive regulation of MAPK cascade;GO:0031347//regulation of defense response;GO:0006935//chemotaxis;GO:0010935//regulation of macrophage cytokine production	K06529//semaphorin 7	gi|225637520|ref|NP_001139501.1|//semaphorin-7A isoform 2 precursor [Homo sapiens];gi|4504237|ref|NP_003603.1|//semaphorin-7A isoform 1 preproprotein [Homo sapiens];gi|795399484|ref|XP_011755267.1|//PREDICTED: semaphorin-7A isoform X2 [Macaca nemestrina]
9534	4116	473.26	1582.05	1.597	3.06561e-117	Up	1.88231e-117	ZNF254	GO:0043231//intracellular membrane-bounded organelle	GO:0046914//transition metal ion binding;GO:0003676//nucleic acid binding	GO:0006357//regulation of transcription from RNA polymerase II promoter	K09228//KRAB domain-containing zinc finger protein	gi|426388075|ref|XP_004060476.1|//PREDICTED: LOW QUALITY PROTEIN: zinc finger protein 254 [Gorilla gorilla gorilla];gi|522020919|ref|NP_001265590.1|//zinc finger protein 254 isoform a [Homo sapiens];gi|116256449|ref|NP_975011.3|//zinc finger protein 254 isoform b [Homo sapiens];gi|768004826|ref|XP_011526748.1|//PREDICTED: zinc finger protein 254 isoform X3 [Homo sapiens];gi|635112943|ref|XP_00797…
222234	2296	103	344	1.59568	5.51704e-27	Up	6.83548e-27	FAM185A	NA	NA	NA	NA	gi|223671925|ref|NP_001138740.1|//protein FAM185A isoform 1 [Homo sapiens];gi|223671927|ref|NP_001138741.1|//protein FAM185A isoform 2 [Homo sapiens]
7046	6518	2190	7314	1.59564	0	Up	0	TGFBR1	GO:0031224//intrinsic component of membrane;GO:0044459//plasma membrane part;GO:0043235//receptor complex	GO:0005024//transforming growth factor beta-activated receptor activity;GO:0019838//growth factor binding;GO:0005160//transforming growth factor beta receptor binding;GO:0046983//protein dimerization activity;GO:0043169//cation binding;GO:0032559//adenyl ribonucleotide binding;GO:0046332//SMAD binding;GO:0019899//enzyme binding	GO:0048732//gland development;GO:0003002//regionalization;GO:0030857//negative regulation of epithelial cell differentiation;GO:0031346//positive regulation of cell projection organization;GO:0016049//cell growth;GO:0051098//regulation of binding;GO:0008283//cell proliferation;GO:0001934//positive regulation of protein phosphorylation;GO:0048534//hematopoietic or lymphoid organ development;GO:000…	K04674//TGF-beta receptor type-1 [EC:2.7.11.30]	gi|402896861|ref|XP_003911501.1|//PREDICTED: TGF-beta receptor type-1 isoform X5 [Papio anubis];gi|4759226|ref|NP_004603.1|//TGF-beta receptor type-1 isoform 1 precursor [Homo sapiens];gi|795623265|ref|XP_011731922.1|//PREDICTED: TGF-beta receptor type-1 isoform X3 [Macaca nemestrina]
8174	1546	142	474.09	1.59518	1.90303e-36	Up	2.06583e-36	MADCAM1	GO:0031224//intrinsic component of membrane	NA	GO:0009913//epidermal cell differentiation;GO:0002682//regulation of immune system process;GO:0023052//signaling;GO:0002684//positive regulation of immune system process	K06779//mucosal vascular addressin cell adhesion molecule 1	gi|18780285|ref|NP_570118.1|//mucosal addressin cell adhesion molecule 1 isoform b precursor [Homo sapiens];gi|109633022|ref|NP_570116.2|//mucosal addressin cell adhesion molecule 1 isoform a precursor [Homo sapiens]
84548	2406	117.84	393	1.59361	1.67619e-30	Up	1.97031e-30	TMEM185A	GO:0031224//intrinsic component of membrane	NA	NA	K00547//homocysteine S-methyltransferase [EC:2.1.1.10];K18207//protein O-mannose beta-1,4-N-acetylglucosaminyltransferase [EC:2.4.1.312]	gi|725610121|ref|XP_010331332.1|//PREDICTED: transmembrane protein 185A [Saimiri boliviensis boliviensis];gi|22296884|ref|NP_115897.1|//transmembrane protein 185A isoform 1 [Homo sapiens];gi|291575181|ref|NP_001167563.1|//transmembrane protein 185A isoform 2 [Homo sapiens] ;gi|13785928|gb|AAK39521.1|AF353675_1//unknown [Homo sapiens]
84910	5228	227	757	1.59352	6.02816e-57	Up	5.24964e-57	TMEM87B	GO:0031224//intrinsic component of membrane	NA	NA	NA	gi|578805044|ref|XP_006712870.1|//PREDICTED: transmembrane protein 87B isoform X1 [Homo sapiens];gi|14249524|ref|NP_116213.1|//transmembrane protein 87B precursor [Homo sapiens]
55303	1983	2444	8150	1.59347	0	Up	0	GIMAP4	NA	GO:0032561//guanyl ribonucleotide binding	NA	K10884//ATP-dependent DNA helicase 2 subunit 1	gi|8922873|ref|NP_060796.1|//GTPase IMAP family member 4 [Homo sapiens]
65123	5249	1920	6401	1.59311	0	Up	0	INTS3	GO:0016591//DNA-directed RNA polymerase II, holoenzyme	GO:0005488//binding	GO:0016073//snRNA metabolic process;GO:0000075//cell cycle checkpoint;GO:0033554//cellular response to stress;GO:0009314//response to radiation;GO:0006259//DNA metabolic process	K13140//integrator complex subunit 3	gi|39995084|ref|NP_075391.3|//integrator complex subunit 3 [Homo sapiens]
285180	2777	54	180	1.59288	5.55896e-15	Up	8.71199e-15	RUFY4	NA	GO:0046914//transition metal ion binding	NA	NA	gi|282165733|ref|NP_940885.2|//RUN and FYVE domain-containing protein 4 [Homo sapiens]
3008	785	24	80	1.59288	1.14528e-07	Up	2.32623e-07	HIST1H1E	GO:0043231//intracellular membrane-bounded organelle	GO:0005488//binding	NA	K11275//histone H1/5	gi|57110423|ref|XP_545391.1|//PREDICTED: histone H1.4 [Canis lupus familiaris]
10150	4755	21	70	1.59288	6.2565e-07	Up	1.31685e-06	MBNL2	GO:0043231//intracellular membrane-bounded organelle	GO:0046914//transition metal ion binding;GO:0003676//nucleic acid binding	GO:0006396//RNA processing;GO:0010468//regulation of gene expression	K14943//muscleblind	gi|46411180|ref|NP_997187.1|//muscleblind-like protein 2 isoform 3 [Homo sapiens];gi|402902332|ref|XP_003914061.1|//PREDICTED: muscleblind-like protein 2 isoform X2 [Papio anubis];gi|807045900|ref|NP_001292999.1|//muscleblind-like protein 2 isoform 4 [Homo sapiens]
26297	1582	9	30	1.59288	0.000599722	Up	0.00154187	SERGEF	GO:0043231//intracellular membrane-bounded organelle	GO:0005088//Ras guanyl-nucleotide exchange factor activity;GO:0005488//binding	GO:0048523//negative regulation of cellular process;GO:0023052//signaling	K15421//secretion-regulating guanine nucleotide exchange factor	gi|635014834|ref|XP_008003388.1|//PREDICTED: secretion-regulating guanine nucleotide exchange factor isoform X8 [Chlorocebus sabaeus];gi|6912330|ref|NP_036271.1|//secretion-regulating guanine nucleotide exchange factor [Homo sapiens];gi|675746889|ref|XP_008969739.1|//PREDICTED: secretion-regulating guanine nucleotide exchange factor isoform X4 [Pan paniscus]
222698	1682	15	49.96	1.59173	1.9225e-05	Up	4.4192e-05	NKAPL	NA	NA	NA	K09229//KRAB and SCAN domains-containing zinc finger protein	gi|75516704|gb|AAI01686.1|//NFKB activating protein-like [Homo sapiens]
11059	4120	106	353	1.59152	1.52731e-27	Up	1.87084e-27	WWP1	GO:0016020//membrane;GO:0043231//intracellular membrane-bounded organelle;GO:0043234//protein complex	GO:0019787//ubiquitin-like protein transferase activity;GO:0005488//binding	GO:0007399//nervous system development;GO:0030260//entry into host cell;GO:0006511//ubiquitin-dependent protein catabolic process;GO:0016567//protein ubiquitination;GO:0023052//signaling	K05633//atrophin-1 interacting protein 5 (WW domain containing E3 ubiquitin protein ligase 1) [EC:2.3.2.26]	gi|13654239|ref|NP_008944.1|//NEDD4-like E3 ubiquitin-protein ligase WWP1 [Homo sapiens]
375743	10057	1225	4076	1.59029	4.10567e-297	Up	1.47909e-297	PTAR1	NA	GO:0004659//prenyltransferase activity	GO:0006497//protein lipidation	K14137//protein prenyltransferase alpha subunit repeat containing protein 1	gi|31565526|gb|AAH53622.1|//PTAR1 protein, partial [Homo sapiens]
2323	1103	99	329	1.5885	9.7966e-26	Up	1.23883e-25	FLT3LG	GO:0031224//intrinsic component of membrane;GO:0044421//extracellular region part	GO:0005102//receptor binding	GO:0008283//cell proliferation;GO:0023052//signaling	K05454//fms-related tyrosine kinase 3 ligand	gi|635040424|ref|XP_007995738.1|//PREDICTED: fms-related tyrosine kinase 3 ligand isoform X1 [Chlorocebus sabaeus];gi|694976193|ref|XP_009434325.1|//PREDICTED: fms-related tyrosine kinase 3 ligand [Pan troglodytes]
4835	1371	1676	5565	1.58727	0	Up	0	NQO2	GO:0031981//nuclear lumen	GO:0043169//cation binding;GO:0048037//cofactor binding;GO:0003959//NADPH dehydrogenase activity	GO:0008152//metabolic process	K08071//ribosyldihydronicotinamide dehydrogenase (quinone) [EC:1.10.5.1]	gi|224983640|pdb|3FW1|A//Chain A, Quinone Reductase 2;gi|589811532|ref|NP_001277151.1|//ribosyldihydronicotinamide dehydrogenase [quinone] isoform 2 [Homo sapiens]
55847	2115	22	73	1.58631	4.04402e-07	Up	8.43672e-07	CISD1	GO:0031224//intrinsic component of membrane;GO:0031966//mitochondrial membrane	GO:0043169//cation binding;GO:0051536//iron-sulfur cluster binding	GO:0043467//regulation of generation of precursor metabolites and energy	NA	gi|587004277|ref|XP_003993996.2|//PREDICTED: CDGSH iron-sulfur domain-containing protein 1 isoform X2 [Felis catus]
84926	2949	489.74	1624.93	1.5862	3.31137e-119	Up	2.01739e-119	SPRYD3	NA	NA	NA	K08844//leucine-rich repeat kinase 2 [EC:2.7.11.1]	gi|635065538|ref|XP_008001558.1|//PREDICTED: SPRY domain-containing protein 3 [Chlorocebus sabaeus]
23336	7355	19	63	1.58527	2.22019e-06	Up	4.8065e-06	SYNM	GO:0045111//intermediate filament cytoskeleton;GO:0043234//protein complex;GO:0030016//myofibril;GO:0070161//anchoring junction	GO:0008092//cytoskeletal protein binding;GO:0005198//structural molecule activity;GO:0032403//protein complex binding	GO:0007010//cytoskeleton organization	K10376//desmuslin	gi|112382237|ref|NP_663780.2|//synemin isoform A [Homo sapiens];gi|112382239|ref|NP_056101.5|//synemin isoform B [Homo sapiens]
54621	5003	194.26	644.04	1.58508	2.19906e-48	Up	2.08499e-48	VSIG10	GO:0031224//intrinsic component of membrane	NA	NA	K18656//ATP-dependent RNA helicase DDX25 [EC:3.6.4.13];K17341//hemicentin	gi|40254891|ref|NP_061959.2|//V-set and immunoglobulin domain-containing protein 10 precursor [Homo sapiens]
132299	776	16	53	1.58383	1.22047e-05	Up	2.76875e-05	OCIAD2	GO:0043231//intracellular membrane-bounded organelle	NA	NA	NA	gi|62244044|ref|NP_001014446.1|//OCIA domain-containing protein 2 isoform 1 [Homo sapiens]
7570	2204	13	43	1.58174	6.7694e-05	Up	0.00016196	ZNF22	GO:0031981//nuclear lumen;GO:0016020//membrane	GO:0046914//transition metal ion binding;GO:0003676//nucleic acid binding	GO:0009887//animal organ morphogenesis	K09228//KRAB domain-containing zinc finger protein	gi|42714596|ref|NP_008894.2|//zinc finger protein 22 [Homo sapiens]
79613	4834	13	43	1.58174	6.7694e-05	Up	0.00016196	TANGO6	GO:0031224//intrinsic component of membrane	NA	NA	K14548//U3 small nucleolar RNA-associated protein 4;K00752//hyaluronan synthase [EC:2.4.1.212]	gi|153791502|ref|NP_078838.1|//transport and Golgi organization protein 6 homolog [Homo sapiens]
6006	1223	9.54	31.49	1.57875	0.000496566	Up	0.00126647	RHCE	GO:0016021//integral component of membrane	GO:0015101//organic cation transmembrane transporter activity	GO:0006810//transport;GO:0015696//ammonium transport	K06579//Rhesus blood group glycoprotein	gi|301129227|ref|NP_065231.3|//blood group Rh(CE) polypeptide isoform 1 [Homo sapiens];gi|301129229|ref|NP_619523.3|//blood group Rh(CE) polypeptide isoform 4 [Homo sapiens];gi|301129225|ref|NP_619522.3|//blood group Rh(CE) polypeptide isoform 3 [Homo sapiens];gi|301129223|ref|NP_619524.3|//blood group Rh(CE) polypeptide isoform 2 [Homo sapiens];gi|530361284|ref|XP_005246014.1|//PREDICTED: blood …
55605	6494	10	33	1.57838	0.000383464	Up	0.000969278	KIF21A	GO:0015630//microtubule cytoskeleton	GO:0032559//adenyl ribonucleotide binding;GO:0003774//motor activity	GO:0007017//microtubule-based process	K10395//kinesin family member 4/21/27	gi|291167760|ref|NP_001166934.1|//kinesin-like protein KIF21A isoform 3 [Homo sapiens];gi|38569484|ref|NP_060111.2|//kinesin-like protein KIF21A isoform 2 [Homo sapiens];gi|291167762|ref|NP_001166935.1|//kinesin-like protein KIF21A isoform 1 [Homo sapiens];gi|291167764|ref|NP_001166936.1|//kinesin-like protein KIF21A isoform 4 [Homo sapiens]
3417	2402	101	333	1.57708	8.96895e-26	Up	1.13316e-25	IDH1	GO:0044439//peroxisomal part	GO:0004448//isocitrate dehydrogenase activity;GO:0046872//metal ion binding;GO:0000166//nucleotide binding;GO:0042802//identical protein binding	GO:0006790//sulfur compound metabolic process;GO:0043648//dicarboxylic acid metabolic process;GO:0006950//response to stress;GO:0044262//cellular carbohydrate metabolic process;GO:0009060//aerobic respiration;GO:0008406//gonad development;GO:0009725//response to hormone;GO:0006629//lipid metabolic process	K00031//isocitrate dehydrogenase [EC:1.1.1.42]	gi|28178825|ref|NP_005887.2|//isocitrate dehydrogenase [NADP] cytoplasmic [Homo sapiens]
54952	1884	67	221	1.57773	9.50239e-18	Up	1.39522e-17	TRNAU1AP	GO:0043231//intracellular membrane-bounded organelle	GO:0003676//nucleic acid binding	GO:0006451//translational readthrough	K13201//nucleolysin TIA-1/TIAR;K13126//polyadenylate-binding protein	gi|795260115|ref|XP_011811056.1|//PREDICTED: tRNA selenocysteine 1-associated protein 1 [Colobus angolensis palliatus];gi|859757313|ref|XP_004741070.2|//PREDICTED: tRNA selenocysteine 1-associated protein 1 isoform X1 [Mustela putorius furo]
3482	14058	73848.4	167820	1.04019	0	Up	0	IGF2R	GO:0005635//nuclear envelope;GO:0005798//Golgi-associated vesicle;GO:0016021//integral component of membrane;GO:0005764//lysosome	GO:0048029//monosaccharide binding;GO:0019838//growth factor binding;GO:0004714//transmembrane receptor protein tyrosine kinase activity	GO:0007169//transmembrane receptor protein tyrosine kinase signaling pathway;GO:0006897//endocytosis	K06564//insulin-like growth factor 2 receptor	gi|119964726|ref|NP_000867.2|//cation-independent mannose-6-phosphate receptor precursor [Homo sapiens]
80198	2406	215	708	1.57533	1.54886e-52	Up	1.40019e-52	MUS81	GO:0031981//nuclear lumen	GO:0043169//cation binding;GO:0016889//endodeoxyribonuclease activity, producing 3'-phosphomonoesters;GO:0003676//nucleic acid binding	GO:0006259//DNA metabolic process	K08991//crossover junction endonuclease MUS81 [EC:3.1.22.-]	gi|119594859|gb|EAW74453.1|//MUS81 endonuclease homolog (yeast), isoform CRA_a [Homo sapiens]
23285	4364	24	79	1.57473	1.69243e-07	Up	3.46516e-07	KIAA1107	NA	NA	NA	K10480//BTB/POZ domain-containing protein 8	gi|197245440|ref|NP_056052.2|//uncharacterized protein KIAA1107 [Homo sapiens]
817	3329	24	79	1.57473	1.69243e-07	Up	3.46516e-07	CAMK2D	GO:0016020//membrane;GO:0031981//nuclear lumen;GO:0030139//endocytic vesicle;GO:0043234//protein complex;GO:0042383//sarcolemma;GO:0045202//synapse	GO:0005515//protein binding;GO:0004674//protein serine/threonine kinase activity;GO:0032559//adenyl ribonucleotide binding	GO:0006950//response to stress;GO:0006468//protein phosphorylation;GO:0007267//cell-cell signaling;GO:0016049//cell growth;GO:0006941//striated muscle contraction;GO:0006875//cellular metal ion homeostasis;GO:0006464//cellular protein modification process;GO:0008283//cell proliferation;GO:0000086//G2/M transition of mitotic cell cycle;GO:0019221//cytokine-mediated signaling pathway;GO:0070838//di…	K04515//calcium/calmodulin-dependent protein kinase (CaM kinase) II [EC:2.7.11.17]	gi|62088156|dbj|BAD92525.1|//calcium/calmodulin-dependent protein kinase II delta isoform 1 variant [Homo sapiens];gi|675648080|ref|XP_008991045.1|//PREDICTED: calcium/calmodulin-dependent protein kinase type II subunit delta isoform X17 [Callithrix jacchus];gi|675648074|ref|XP_008991042.1|//PREDICTED: calcium/calmodulin-dependent protein kinase type II subunit delta isoform X14 [Callithrix jacch…
10771	3928	38	125	1.57377	8.32572e-11	Up	1.47817e-10	ZMYND11	GO:0031981//nuclear lumen	GO:0046914//transition metal ion binding;GO:0003676//nucleic acid binding	GO:0006357//regulation of transcription from RNA polymerase II promoter;GO:0009987//cellular process;GO:0051704//multi-organism process	K20289//conserved oligomeric Golgi complex subunit 2;K08883//tripartite motif-containing protein 33 [EC:2.3.2.27];K08881//tripartite motif-containing protein 24 [EC:2.3.2.27]	gi|321117035|ref|NP_001189394.1|//zinc finger MYND domain-containing protein 11 isoform d [Homo sapiens] ;gi|321117043|ref|NP_001189395.1|//zinc finger MYND domain-containing protein 11 isoform e [Homo sapiens] ;gi|640782950|ref|XP_008047130.1|//PREDICTED: zinc finger MYND domain-containing protein 11 isoform X4 [Tarsius syrichta];gi|238814385|ref|NP_006615.2|//zinc finger MYND domain-containing …
7010	4787	45	148	1.57351	1.86913e-12	Up	3.13781e-12	TEK	GO:0042995//cell projection;GO:0044459//plasma membrane part;GO:0016021//integral component of membrane	GO:0004713//protein tyrosine kinase activity;GO:0032559//adenyl ribonucleotide binding;GO:0004871//signal transducer activity	GO:0006464//cellular protein modification process;GO:0002376//immune system process;GO:0043410//positive regulation of MAPK cascade;GO:0048646//anatomical structure formation involved in morphogenesis;GO:0007599//hemostasis;GO:0006461//protein complex assembly;GO:0007167//enzyme linked receptor protein signaling pathway	K05121//endothelial-specific receptor tyrosine kinase [EC:2.7.10.1]	gi|587651919|ref|NP_001277007.1|//angiopoietin-1 receptor isoform 3 precursor [Homo sapiens] ;gi|62087172|dbj|BAD92033.1|//TEK tyrosine kinase variant [Homo sapiens]
56160	1748	35	115	1.57212	4.48924e-10	Up	8.18603e-10	NSMCE3	GO:0043231//intracellular membrane-bounded organelle	NA	GO:0050789//regulation of biological process;GO:0006351//transcription, DNA-templated	K12464//melanoma-associated antigen D1	gi|20162572|ref|NP_619649.1|//melanoma-associated antigen G1 [Homo sapiens]
9651	5472	35	115	1.57212	4.48924e-10	Up	8.18603e-10	PLCH2	GO:0016020//membrane;GO:0044424//intracellular part	GO:0046872//metal ion binding;GO:0060089//molecular transducer activity;GO:0004629//phospholipase C activity	GO:0007165//signal transduction;GO:0006629//lipid metabolic process	K19006//phosphatidylinositol phospholipase C, eta [EC:3.1.4.11]	gi|78499633|ref|NP_055453.2|//1-phosphatidylinositol 4,5-bisphosphate phosphodiesterase eta-2 isoform 1 [Homo sapiens];gi|795362516|ref|XP_011786378.1|//PREDICTED: 1-phosphatidylinositol 4,5-bisphosphate phosphodiesterase eta-2 isoform X3 [Colobus angolensis palliatus];gi|732170479|ref|NP_001289941.1|//1-phosphatidylinositol 4,5-bisphosphate phosphodiesterase eta-2 isoform 2 [Homo sapiens]
143630	2350	25	82	1.56961	1.09567e-07	Up	2.22146e-07	UBQLNL	NA	NA	NA	K04523//ubiquilin	gi|395743133|ref|XP_002822160.2|//PREDICTED: LOW QUALITY PROTEIN: ubiquilin-like protein [Pongo abelii]
57605	6754	25	82	1.56961	1.09567e-07	Up	2.22146e-07	PITPNM2	GO:0031224//intrinsic component of membrane;GO:0043227//membrane-bounded organelle	GO:0046872//metal ion binding;GO:0005488//binding	GO:0051234//establishment of localization	K13619//phospholipase DDHD1 [EC:3.1.1.-];K00469//inositol oxygenase [EC:1.13.99.1]	gi|24308237|ref|NP_065896.1|//membrane-associated phosphatidylinositol transfer protein 2 isoform 1 [Homo sapiens];gi|663856157|ref|NP_001287730.1|//membrane-associated phosphatidylinositol transfer protein 2 isoform 2 [Homo sapiens]
100913187	1103	1976.21	6480.62	1.56931	0	Up	0	APOBEC3A_B	NA	GO:0046914//transition metal ion binding;GO:0016810//hydrolase activity, acting on carbon-nitrogen (but not peptide) bonds	NA	K18750//C->U-editing enzyme APOBEC3 [EC:3.5.4.-]	gi|21955158|ref|NP_663745.1|//DNA dC->dU-editing enzyme APOBEC-3A isoform a [Homo sapiens]
79685	6243	562	1842	1.56855	1.01181e-132	Up	5.82306e-133	SAP30L	GO:0031981//nuclear lumen;GO:0005634//nucleus	GO:0043169//cation binding;GO:0005488//binding;GO:0003676//nucleic acid binding	NA	K19202//histone deacetylase complex subunit SAP30	gi|955513955|ref|XP_014641701.1|//PREDICTED: histone deacetylase complex subunit SAP30L [Ceratotherium simum simum]
6944	1546	253	829	1.56815	8.59533e-61	Up	7.29686e-61	VPS72	GO:0043231//intracellular membrane-bounded organelle;GO:0032991//macromolecular complex	GO:0001071//null;GO:0003676//nucleic acid binding	GO:0006357//regulation of transcription from RNA polymerase II promoter;GO:0006325//chromatin organization	K11664//vacuolar protein sorting-associated protein 72	gi|795098842|ref|XP_011828943.1|//PREDICTED: vacuolar protein sorting-associated protein 72 homolog isoform X2 [Mandrillus leucophaeus];gi|5174715|ref|NP_005988.1|//vacuolar protein sorting-associated protein 72 homolog isoform 2 [Homo sapiens];gi|402793870|ref|NP_001258016.1|//vacuolar protein sorting-associated protein 72 homolog isoform 1 [Homo sapiens]
339541	1698	29	95	1.56779	1.30575e-08	Up	2.53916e-08	C1orf228	NA	NA	NA	NA	gi|224500884|ref|NP_001139108.1|//uncharacterized protein C1orf228 [Homo sapiens]
10000	7091	26.11	85.48	1.5669	6.37983e-08	Up	1.27853e-07	AKT3	GO:0016020//membrane;GO:0031981//nuclear lumen	GO:0032559//adenyl ribonucleotide binding;GO:0004672//protein kinase activity;GO:0019901//protein kinase binding	GO:0006464//cellular protein modification process;GO:0002028//regulation of sodium ion transport;GO:0032868//response to insulin;GO:0023052//signaling;GO:0006468//protein phosphorylation	K04456//RAC serine/threonine-protein kinase [EC:2.7.11.1]	gi|4885549|ref|NP_005456.1|//RAC-gamma serine/threonine-protein kinase isoform 1 [Homo sapiens];gi|617554660|ref|XP_007534726.1|//PREDICTED: RAC-gamma serine/threonine-protein kinase isoform X2 [Erinaceus europaeus]
80003	6817	42	137	1.56163	1.47762e-11	Up	2.55116e-11	PCNX2	GO:0031224//intrinsic component of membrane	NA	NA	NA	gi|134254443|ref|NP_055616.3|//pecanex-like protein 2 [Homo sapiens];gi|675750633|ref|XP_008984050.1|//PREDICTED: pecanex-like protein 2 [Callithrix jacchus]
139341	1170	46	150	1.56117	1.78416e-12	Up	2.98965e-12	FUNDC1	NA	NA	NA	K17986//FUN14 domain-containing protein 1	gi|676262199|gb|KFO19229.1|//FUN14 domain-containing protein 1 [Fukomys damarensis]
79844	2618	23	75	1.56117	3.85756e-07	Up	8.0423e-07	ZDHHC11	GO:0031224//intrinsic component of membrane	GO:0046914//transition metal ion binding;GO:0016747//transferase activity, transferring acyl groups other than amino-acyl groups	NA	K20027//palmitoyltransferase ZDHHC1/11 [EC:2.3.1.225]	gi|13376150|ref|NP_079062.1|//probable palmitoyltransferase ZDHHC11 [Homo sapiens]
493753	1767	177	577	1.56074	1.26423e-42	Up	1.27326e-42	COA5	GO:0043231//intracellular membrane-bounded organelle	NA	NA	K18178//cytochrome c oxidase assembly factor 5	gi|56118949|ref|NP_001008216.1|//cytochrome c oxidase assembly factor 5 [Homo sapiens]
2736	6780	13.44	43.72	1.55767	7.0576e-05	Up	0.000169093	GLI2	GO:0043231//intracellular membrane-bounded organelle;GO:0072372//null	GO:0046914//transition metal ion binding;GO:0043565//sequence-specific DNA binding;GO:0001071//null	GO:0060033//anatomical structure regression;GO:0001649//osteoblast differentiation;GO:0014070//response to organic cyclic compound;GO:0060562//epithelial tube morphogenesis;GO:0048732//gland development;GO:0006275//regulation of DNA replication;GO:0033077//T cell differentiation in thymus;GO:0007418//ventral midline development;GO:0030323//respiratory tube development;GO:0043009//chordate embryon…	K16798//zinc finger protein GLI2	gi|86991432|ref|NP_005261.2|//zinc finger protein GLI2 [Homo sapiens]
79623	2708	216	702	1.55635	3.13108e-51	Up	2.871e-51	GALNT14	GO:0043231//intracellular membrane-bounded organelle;GO:0031224//intrinsic component of membrane;GO:0012505//endomembrane system	GO:0030246//carbohydrate binding;GO:0008376//acetylgalactosaminyltransferase activity	NA	K00710//polypeptide N-acetylgalactosaminyltransferase [EC:2.4.1.41]	gi|359465583|ref|NP_001240755.1|//polypeptide N-acetylgalactosaminyltransferase 14 isoform 2 [Homo sapiens];gi|60498976|ref|NP_078848.2|//polypeptide N-acetylgalactosaminyltransferase 14 isoform 1 [Homo sapiens];gi|767915225|ref|XP_011531406.1|//PREDICTED: polypeptide N-acetylgalactosaminyltransferase 14 isoform X2 [Homo sapiens];gi|795514798|ref|XP_011899517.1|//PREDICTED: polypeptide N-acetylga…
7791	2323	54982	178591	1.55554	0	Up	0	ZYX	GO:0005911//cell-cell junction;GO:0016021//integral component of membrane;GO:0032432//actin filament bundle;GO:0005924//cell-substrate adherens junction	GO:0046872//metal ion binding	GO:0007154//cell communication;GO:0023052//signaling	K06273//zyxin	gi|576623|gb|AAA78902.1|//ESP-2, partial [Homo sapiens]
10023	2651	1704.3	5533.74	1.55499	0	Up	0	FRAT1	NA	NA	NA	K03069//frequently rearranged in advanced T-cell lymphomas 1	gi|31317236|ref|NP_005470.2|//proto-oncogene FRAT1 [Homo sapiens]
30009	2589	81	263	1.55498	2.26525e-20	Up	3.16116e-20	TBX21	GO:0043231//intracellular membrane-bounded organelle;GO:0044297//cell body	GO:0001071//null;GO:0003676//nucleic acid binding	GO:0006351//transcription, DNA-templated;GO:0045830//positive regulation of isotype switching	K10166//T-box protein 21	gi|7019549|ref|NP_037483.1|//T-box transcription factor TBX21 [Homo sapiens]
7277	2083	8776.92	28471.6	1.55365	0	Up	0	TUBA4A	GO:0032991//macromolecular complex;GO:0015630//microtubule cytoskeleton;GO:0044444//cytoplasmic part	GO:0032561//guanyl ribonucleotide binding;GO:0017111//nucleoside-triphosphatase activity	GO:0001775//cell activation;GO:0006458//'de novo' protein folding;GO:0022402//cell cycle process;GO:0007017//microtubule-based process;GO:0007599//hemostasis;GO:0009207//purine ribonucleoside triphosphate catabolic process;GO:0043623//cellular protein complex assembly;GO:0006887//exocytosis	K07374//tubulin alpha	gi|795279976|ref|XP_011820023.1|//PREDICTED: tubulin alpha-4A chain isoform X1 [Mandrillus leucophaeus];gi|6678467|ref|NP_033473.1|//tubulin alpha-4A chain isoform 1 [Mus musculus]
1593	2388	1273	4125	1.55208	2.83586e-290	Up	1.03678e-290	CYP27A1	GO:0044429//mitochondrial part;GO:0019866//organelle inner membrane	GO:0008395//steroid hydroxylase activity;GO:0016709//oxidoreductase activity, acting on paired donors, with incorporation or reduction of molecular oxygen, NAD(P)H as one donor, and incorporation of one atom of oxygen;GO:0005506//iron ion binding;GO:0070643//vitamin D 25-hydroxylase activity	GO:0006694//steroid biosynthetic process;GO:0044237//cellular metabolic process;GO:0016125//sterol metabolic process	K00488//cholestanetriol 26-monooxygenase [EC:1.14.15.15]	gi|4503211|ref|NP_000775.1|//sterol 26-hydroxylase, mitochondrial precursor [Homo sapiens]
81606	2956	75	243	1.55191	6.47818e-19	Up	9.29334e-19	LBH	GO:0031981//nuclear lumen	NA	GO:0006355//regulation of transcription, DNA-templated;GO:0032501//multicellular organismal process	K04010//C5a anaphylatoxin chemotactic receptor	gi|10834656|gb|AAG23758.1|AF258555_1//PP2281 [Homo sapiens]
23171	4068	21	68	1.55106	1.36326e-06	Up	2.92261e-06	GPD1L	GO:0044424//intracellular part;GO:0043234//protein complex	GO:0016616//oxidoreductase activity, acting on the CH-OH group of donors, NAD or NADP as acceptor;GO:0000166//nucleotide binding;GO:0042802//identical protein binding;GO:0048037//cofactor binding	GO:0006072//glycerol-3-phosphate metabolic process	K00006//glycerol-3-phosphate dehydrogenase (NAD+) [EC:1.1.1.8]	gi|24307999|ref|NP_055956.1|//glycerol-3-phosphate dehydrogenase 1-like protein [Homo sapiens]
11216	3941	1136	3675	1.5497	3.00129e-258	Up	1.17907e-258	AKAP10	GO:0016020//membrane;GO:0043231//intracellular membrane-bounded organelle;GO:0044444//cytoplasmic part	GO:0060089//molecular transducer activity	GO:0023052//signaling;GO:0033036//macromolecule localization;GO:0007599//hemostasis	K16526//A-kinase anchor protein 10	gi|578829666|ref|XP_006721495.1|//PREDICTED: A-kinase anchor protein 10, mitochondrial isoform X2 [Homo sapiens];gi|21493033|ref|NP_009133.2|//A-kinase anchor protein 10, mitochondrial precursor [Homo sapiens]
4773	7078	94	304	1.54925	3.90846e-23	Up	5.14452e-23	NFATC2	GO:0016020//membrane;GO:0031981//nuclear lumen;GO:0005856//cytoskeleton	GO:0005488//binding;GO:0001071//null;GO:0003676//nucleic acid binding	GO:0030888//regulation of B cell proliferation;GO:0033554//cellular response to stress;GO:0042221//response to chemical;GO:0006351//transcription, DNA-templated;GO:0050851//antigen receptor-mediated signaling pathway	K17332//nuclear factor of activated T-cells, cytoplasmic 2	gi|1353776|gb|AAC50887.1|//transcription factor NFAT1 isoform C [Homo sapiens];gi|209862843|ref|NP_001129493.1|//nuclear factor of activated T-cells, cytoplasmic 2 isoform D [Homo sapiens];gi|385137140|ref|NP_001245221.1|//nuclear factor of activated T-cells, cytoplasmic 2 isoform E [Homo sapiens];gi|1353774|gb|AAC50886.1|//transcription factor NFAT1 isoform B [Homo sapiens];gi|27886539|ref|NP_03…
4609	2379	47	152	1.54925	1.69671e-12	Up	2.84121e-12	MYC	GO:0031981//nuclear lumen;GO:0015630//microtubule cytoskeleton	GO:0001071//null	GO:0006875//cellular metal ion homeostasis;GO:0022402//cell cycle process;GO:0006355//regulation of transcription, DNA-templated;GO:0042221//response to chemical;GO:0002053//positive regulation of mesenchymal cell proliferation;GO:0000723//telomere maintenance;GO:0048754//branching morphogenesis of an epithelial tube	K04377//Myc proto-oncogene protein	gi|71774083|ref|NP_002458.2|//myc proto-oncogene protein [Homo sapiens]
79760	951	100	323	1.54745	2.01086e-24	Up	2.58635e-24	GEMIN7	GO:0030529//intracellular ribonucleoprotein complex;GO:0016604//nuclear body;GO:0044444//cytoplasmic part	GO:0005488//binding	GO:0000398//mRNA splicing, via spliceosome	K13135//gem associated protein 7	gi|675743439|ref|XP_008968999.1|//PREDICTED: gem-associated protein 7 isoform X1 [Pan paniscus];gi|675743442|ref|XP_008969000.1|//PREDICTED: gem-associated protein 7 isoform X2 [Pan paniscus]
93185	2218	35	113	1.54681	9.67559e-10	Up	1.78825e-09	IGSF8	GO:0031224//intrinsic component of membrane	GO:0005488//binding	GO:0014706//striated muscle tissue development;GO:0009566//fertilization;GO:0009987//cellular process;GO:0048731//system development	K06730//immunoglobulin superfamily, member 8	gi|16445029|ref|NP_443100.1|//immunoglobulin superfamily member 8 precursor [Homo sapiens]
9741	1783	5097	16453	1.54654	0	Up	0	LAPTM4A	GO:0043231//intracellular membrane-bounded organelle;GO:0031224//intrinsic component of membrane	NA	GO:0051234//establishment of localization	K12387//lysosomal-associated transmembrane protein	gi|149050909|gb|EDM03082.1|//lysosomal-associated protein transmembrane 4A [Rattus norvegicus]
30815	2415	44	142	1.54623	9.12675e-12	Up	1.56191e-11	ST6GALNAC6	GO:0031228//intrinsic component of Golgi membrane	GO:0008373//sialyltransferase activity	GO:0006464//cellular protein modification process;GO:0001573//ganglioside metabolic process	K03376//N-acetylgalactosaminide alpha-2,6-sialyltransferase (sialyltransferase 7F) [EC:2.4.99.-]	gi|821105924|ref|XP_012378588.1|//PREDICTED: alpha-N-acetylgalactosaminide alpha-2,6-sialyltransferase 6 [Dasypus novemcinctus];gi|119608116|gb|EAW87710.1|//ST6 (alpha-N-acetyl-neuraminyl-2,3-beta-galactosyl-1,3)-N-acetylgalactosaminide alpha-2,6-sialyltransferase 6, isoform CRA_a, partial [Homo sapiens]
55619	7288	102	329	1.54543	8.47915e-25	Up	1.08462e-24	DOCK10	NA	GO:0005088//Ras guanyl-nucleotide exchange factor activity;GO:0032561//guanyl ribonucleotide binding;GO:0017016//Ras GTPase binding	NA	K13708//dedicator of cytokinesis protein 1;K05727//dedicator of cytokinesis protein 3	gi|154146189|ref|NP_055504.2|//dedicator of cytokinesis protein 10 DOCK10.1 [Homo sapiens];gi|590121974|ref|NP_001277192.1|//dedicator of cytokinesis protein 10 DOCK10.2 [Homo sapiens]
4012	4368	509	1641	1.54475	6.96628e-116	Up	4.3028e-116	LNPEP	GO:0016021//integral component of membrane	GO:0008238//exopeptidase activity;GO:0046914//transition metal ion binding	GO:0019538//protein metabolic process;GO:0007154//cell communication;GO:0022414//reproductive process	K01257//cystinyl aminopeptidase [EC:3.4.11.3]	gi|931571171|ref|XP_014200423.1|//PREDICTED: LOW QUALITY PROTEIN: leucyl-cystinyl aminopeptidase [Pan paniscus];gi|61742777|ref|NP_005566.2|//leucyl-cystinyl aminopeptidase isoform 1 [Homo sapiens]
2584	1361	286	922	1.54467	5.78391e-66	Up	4.70049e-66	GALK1	GO:0044444//cytoplasmic part	GO:0032559//adenyl ribonucleotide binding;GO:0048029//monosaccharide binding;GO:0016773//phosphotransferase activity, alcohol group as acceptor	GO:0016310//phosphorylation;GO:0006012//galactose metabolic process	K00849//galactokinase [EC:2.7.1.6]	gi|119609722|gb|EAW89316.1|//galactokinase 1 [Homo sapiens]
9673	3663	3832.41	12354.6	1.54464	0	Up	0	SLC25A44	GO:0043231//intracellular membrane-bounded organelle;GO:0031224//intrinsic component of membrane;GO:0019866//organelle inner membrane	NA	GO:0006810//transport	K15121//solute carrier family 25, member 44	gi|148683335|gb|EDL15282.1|//RIKEN cDNA B430110G05, isoform CRA_b, partial [Mus musculus];gi|990011932|ref|XP_006923571.2|//PREDICTED: solute carrier family 25 member 44 isoform X1 [Pteropus alecto]
51528	2495	641.98	2068	1.54355	2.33875e-145	Up	1.28091e-145	JKAMP	GO:0031224//intrinsic component of membrane;GO:0043231//intracellular membrane-bounded organelle;GO:0031090//organelle membrane	GO:0019899//enzyme binding	GO:0043161//proteasome-mediated ubiquitin-dependent protein catabolic process;GO:0006950//response to stress	NA	gi|6841304|gb|AAF29005.1|AF161445_1//HSPC327 [Homo sapiens];gi|545746268|ref|NP_001271131.1|//JNK1/MAPK8-associated membrane protein isoform 4 [Homo sapiens];gi|545746333|ref|NP_001271130.1|//JNK1/MAPK8-associated membrane protein isoform 3 [Homo sapiens]
10928	4368	4448	14325	1.54322	0	Up	0	RALBP1	GO:0044444//cytoplasmic part	GO:0017048//Rho GTPase binding;GO:0042623//ATPase activity, coupled	GO:0042221//response to chemical;GO:0051234//establishment of localization	K08773//RalA-binding protein 1	gi|5803145|ref|NP_006779.1|//ralA-binding protein 1 [Homo sapiens]
284611	5359	108.5	349.22	1.54236	3.89956e-26	Up	4.89173e-26	FAM102B	NA	NA	NA	K11339//mortality factor 4-like protein 1	gi|162809336|ref|NP_001010883.2|//protein FAM102B [Homo sapiens]
6095	10669	257.8	829.42	1.54176	2.22151e-59	Up	1.90402e-59	RORA	GO:0031981//nuclear lumen	GO:0003677//DNA binding;GO:0046914//transition metal ion binding;GO:0004879//nuclear receptor activity;GO:0001071//null	GO:0002694//regulation of leukocyte activation;GO:0021533//cell differentiation in hindbrain;GO:0044271//cellular nitrogen compound biosynthetic process;GO:0023052//signaling;GO:0009755//hormone-mediated signaling pathway	K08532//RAR-related orphan receptor alpha	gi|19743901|ref|NP_599022.1|//nuclear receptor ROR-alpha isoform b [Homo sapiens];gi|19743905|ref|NP_599024.1|//nuclear receptor ROR-alpha isoform d [Homo sapiens];gi|4506577|ref|NP_002934.1|//nuclear receptor ROR-alpha isoform c [Homo sapiens];gi|942078805|ref|XP_014336321.1|//PREDICTED: nuclear receptor ROR-alpha [Bos mutus]
340526	4354	51	164	1.54104	2.99123e-13	Up	4.91311e-13	RGAG4	NA	NA	NA	NA	gi|66792814|ref|NP_001019626.1|//retrotransposon gag domain-containing protein 4 [Homo sapiens]
8045	1617	89	286	1.54005	1.05306e-21	Up	1.42604e-21	RASSF7	GO:0043231//intracellular membrane-bounded organelle	GO:0005488//binding;GO:0003676//nucleic acid binding	GO:0006351//transcription, DNA-templated;GO:0009987//cellular process	K09855//Ras association domain-containing protein 7/8	gi|767966612|ref|XP_011518690.1|//PREDICTED: ras association domain-containing protein 7 isoform X4 [Homo sapiens];gi|530395831|ref|XP_005253205.1|//PREDICTED: ras association domain-containing protein 7 isoform X2 [Homo sapiens];gi|530395833|ref|XP_005253206.1|//PREDICTED: ras association domain-containing protein 7 isoform X3 [Homo sapiens]
79168	1458	6423.72	20641.1	1.53996	0	Up	0	LILRA6	NA	NA	NA	K06512//leukocyte immunoglobulin-like receptor	gi|530788320|ref|NP_077294.3|//leukocyte immunoglobulin-like receptor subfamily A member 6 precursor [Homo sapiens];gi|556523098|gb|AGZ61994.1|//LILRA6 [Homo sapiens]
284439	3243	19	61	1.53872	4.82685e-06	Up	1.06694e-05	SLC25A42	GO:0043231//intracellular membrane-bounded organelle;GO:0031224//intrinsic component of membrane;GO:0019866//organelle inner membrane	NA	GO:0006810//transport	K15085//solute carrier family 25, member 42	gi|821002955|ref|XP_012365089.1|//PREDICTED: mitochondrial coenzyme A transporter SLC25A42 isoform X1 [Nomascus leucogenys]
25853	3688	476	1528	1.53853	2.05085e-107	Up	1.31918e-107	DCAF12	GO:0005815//microtubule organizing center;GO:0031461//cullin-RING ubiquitin ligase complex	NA	GO:0032446//protein modification by small protein conjugation	K11803//WD repeat-containing protein 40A	gi|22218619|ref|NP_056212.1|//DDB1- and CUL4-associated factor 12 [Homo sapiens]
26157	1523	87	279	1.53709	3.64813e-21	Up	4.98947e-21	GIMAP2	GO:0031224//intrinsic component of membrane	GO:0032561//guanyl ribonucleotide binding	NA	NA	gi|28416431|ref|NP_056475.1|//GTPase IMAP family member 2 [Homo sapiens]
3660	2302	4774	15306	1.53674	0	Up	0	IRF2	GO:0031981//nuclear lumen;GO:0005924//cell-substrate adherens junction	GO:0001071//null;GO:0003676//nucleic acid binding	GO:0006357//regulation of transcription from RNA polymerase II promoter;GO:0019221//cytokine-mediated signaling pathway;GO:0007599//hemostasis	K10153//interferon regulatory factor 2	gi|635046005|ref|XP_007998574.1|//PREDICTED: interferon regulatory factor 2 isoform X1 [Chlorocebus sabaeus]
3577	2502	15161.1	92424.3	2.46381	0	Up	0	CXCR1	GO:0031224//intrinsic component of membrane	GO:0019958//C-X-C chemokine binding;GO:0004896//cytokine receptor activity;GO:0001637//G-protein coupled chemoattractant receptor activity	GO:0042221//response to chemical;GO:0006952//defense response;GO:0007166//cell surface receptor signaling pathway	K04175//C-X-C chemokine receptor type 1	gi|4504681|ref|NP_000625.1|//C-X-C chemokine receptor type 1 [Homo sapiens]
9374	2022	15	48	1.53399	4.13051e-05	Up	9.73726e-05	PPT2	GO:0000323//lytic vacuole	GO:0016790//thiolester hydrolase activity	GO:0043412//macromolecule modification	K01074//palmitoyl-protein thioesterase [EC:3.1.2.22]	gi|323362944|ref|NP_619731.2|//lysosomal thioesterase PPT2 isoform b precursor [Homo sapiens];gi|795466039|ref|XP_011890013.1|//PREDICTED: lysosomal thioesterase PPT2 isoform X8 [Cercocebus atys]
5026	2266	15	48	1.53399	4.13051e-05	Up	9.73726e-05	P2RX5	GO:0016021//integral component of membrane	GO:0005231//excitatory extracellular ligand-gated ion channel activity;GO:0016502//nucleotide receptor activity;GO:0032559//adenyl ribonucleotide binding	GO:0010522//regulation of calcium ion transport into cytosol;GO:0035587//purinergic receptor signaling pathway;GO:0009967//positive regulation of signal transduction;GO:0048731//system development	K05219//P2X purinoceptor 5	gi|62088826|dbj|BAD92860.1|//purinergic receptor P2X5 isoform A variant [Homo sapiens]
27090	1630	10	32	1.53399	0.000570416	Up	0.00146299	ST6GALNAC4	GO:0031228//intrinsic component of Golgi membrane	GO:0008373//sialyltransferase activity	GO:0006464//cellular protein modification process;GO:0006643//membrane lipid metabolic process	K03374//N-acetylgalactosaminide alpha-2,6-sialyltransferase (sialyltransferase 7D) [EC:2.4.99.7]	gi|28373092|ref|NP_778204.1|//alpha-N-acetyl-neuraminyl-2,3-beta-galactosyl-1,3-N-acetyl-galactosaminide alpha-2,6-sialyltransferase isoform a [Homo sapiens];gi|767957033|ref|XP_011516829.1|//PREDICTED: alpha-N-acetyl-neuraminyl-2,3-beta-galactosyl-1,3-N-acetyl-galactosaminide alpha-2,6-sialyltransferase isoform X1 [Homo sapiens]
3579	2820	43667.4	204138	2.08083	0	Up	0	CXCR2	GO:0016021//integral component of membrane;GO:0005764//lysosome	GO:0019958//C-X-C chemokine binding;GO:0004896//cytokine receptor activity;GO:0004950//chemokine receptor activity	GO:0007186//G-protein coupled receptor signaling pathway;GO:0008283//cell proliferation;GO:0006952//defense response;GO:0012501//programmed cell death;GO:0030595//leukocyte chemotaxis;GO:0002274//myeloid leukocyte activation	K05050//C-X-C chemokine receptor type 2	gi|4504683|ref|NP_001548.1|//C-X-C chemokine receptor type 2 [Homo sapiens]
9217	7949	910.42	2911.64	1.53314	7.5073e-202	Up	3.42393e-202	VAPB	GO:0043231//intracellular membrane-bounded organelle;GO:0031224//intrinsic component of membrane;GO:0031090//organelle membrane	GO:0015631//tubulin binding;GO:0042802//identical protein binding;GO:0046983//protein dimerization activity	GO:0045069//regulation of viral genome replication;GO:0006984//ER-nucleus signaling pathway;GO:0006643//membrane lipid metabolic process;GO:0051704//multi-organism process	K10707//vesicle-associated membrane protein-associated protein B	gi|675684693|ref|XP_008949097.1|//PREDICTED: vesicle-associated membrane protein-associated protein B/C isoform X2 [Pan paniscus];gi|344237133|gb|EGV93236.1|//Vesicle-associated membrane protein-associated protein B [Cricetulus griseus];gi|4759302|ref|NP_004729.1|//vesicle-associated membrane protein-associated protein B/C isoform 1 [Homo sapiens]
50804	5370	369.47	1181.55	1.53307	4.41021e-83	Up	3.21974e-83	MYEF2	GO:0031981//nuclear lumen	GO:0003676//nucleic acid binding	NA	K12887//heterogeneous nuclear ribonucleoprotein M	gi|667743700|ref|NP_001288139.1|//myelin expression factor 2 isoform b [Homo sapiens];gi|33620747|ref|NP_057216.2|//myelin expression factor 2 isoform a [Homo sapiens]
2057	2459	505	1613	1.53131	1.63317e-112	Up	1.02481e-112	EPOR	GO:0016021//integral component of membrane	GO:0004896//cytokine receptor activity	GO:0003006//developmental process involved in reproduction;GO:0048513//animal organ development;GO:0023052//signaling;GO:0007417//central nervous system development;GO:0051480//regulation of cytosolic calcium ion concentration	K05079//erythropoietin receptor	gi|4503591|ref|NP_000112.1|//erythropoietin receptor precursor [Homo sapiens];gi|686757314|ref|XP_009251078.1|//PREDICTED: erythropoietin receptor isoform X2 [Pongo abelii]
79188	3343	4144	13232	1.53085	0	Up	0	TMEM43	GO:0043231//intracellular membrane-bounded organelle;GO:0031224//intrinsic component of membrane;GO:0019866//organelle inner membrane	NA	NA	NA	gi|13236587|ref|NP_077310.1|//transmembrane protein 43 [Homo sapiens]
162979	1762	508	1618	1.52723	2.01362e-112	Up	1.26524e-112	ZNF296	GO:0005622//intracellular	GO:0046872//metal ion binding	GO:0048232//male gamete generation	K09228//KRAB domain-containing zinc finger protein	gi|21687252|ref|NP_660331.1|//zinc finger protein 296 [Homo sapiens]
221120	1585	11	35	1.52577	0.000363855	Up	0.000917669	ALKBH3	GO:0031981//nuclear lumen	GO:0003677//DNA binding;GO:0016787//hydrolase activity;GO:0005506//iron ion binding;GO:0016701//oxidoreductase activity, acting on single donors with incorporation of molecular oxygen;GO:0016706//oxidoreductase activity, acting on paired donors, with incorporation or reduction of molecular oxygen, 2-oxoglutarate as one donor, and incorporation of one atom each of oxygen into both donors;GO:001984…	GO:0035511//oxidative DNA demethylation;GO:0006281//DNA repair	K10860//mRNA N1-methyladenine demethylase [EC:1.14.11.54]	gi|332210804|ref|XP_003254503.1|//PREDICTED: alpha-ketoglutarate-dependent dioxygenase alkB homolog 3 [Nomascus leucogenys]
3783	2240	11	35	1.52577	0.000363855	Up	0.000917669	KCNN4	GO:0005887//integral component of plasma membrane	GO:0005515//protein binding;GO:0005227//calcium activated cation channel activity	GO:0007589//body fluid secretion;GO:0048522//positive regulation of cellular process;GO:0019725//cellular homeostasis;GO:0015914//phospholipid transport;GO:0006950//response to stress;GO:0030001//metal ion transport	K04945//potassium intermediate/small conductance calcium-activated channel subfamily N member 4	gi|817354888|ref|XP_012302172.1|//PREDICTED: intermediate conductance calcium-activated potassium channel protein 4 isoform X1 [Aotus nancymaae]
643641	6966	347	1104	1.52565	3.22172e-77	Up	2.43173e-77	ZNF862	GO:0043231//intracellular membrane-bounded organelle	GO:0043169//cation binding;GO:0005515//protein binding	GO:0006351//transcription, DNA-templated	K09228//KRAB domain-containing zinc finger protein;K10504//zinc finger and BTB domain-containing protein 25;K14685//solute carrier family 40 (iron-regulated transporter), member 1	gi|426358411|ref|XP_004046505.1|//PREDICTED: zinc finger protein 862 [Gorilla gorilla gorilla]
2153	9179	4705.94	14922.5	1.52085	0	Up	0	F5	GO:0016020//membrane;GO:0044421//extracellular region part;GO:0031091//platelet alpha granule	GO:0046914//transition metal ion binding;GO:0003824//catalytic activity	GO:0001775//cell activation;GO:0008152//metabolic process;GO:0003013//circulatory system process;GO:0007599//hemostasis;GO:0006887//exocytosis	K03902//coagulation factor V (labile factor)	gi|105990535|ref|NP_000121.2|//coagulation factor V preproprotein [Homo sapiens]
10335	5801	3464.37	10981.3	1.5203	0	Up	0	MRVI1	NA	NA	NA	K12337//inositol 1,4,5-triphosphate receptor-associated cGMP kinase substrate	gi|332634578|ref|NP_569056.4|//protein MRVI1 isoform d [Homo sapiens];gi|221045124|dbj|BAH14239.1|//unnamed protein product [Homo sapiens];gi|221043182|dbj|BAH13268.1|//unnamed protein product [Homo sapiens];gi|332634572|ref|NP_001092049.2|//protein MRVI1 isoform a [Homo sapiens];gi|795378848|ref|XP_011937168.1|//PREDICTED: protein MRVI1 isoform X8 [Cercocebus atys]
55578	3111	1912.09	6060.02	1.52009	0	Up	0	SUPT20H	GO:0000123//histone acetyltransferase complex	GO:0005488//binding	GO:0007275//multicellular organism development	NA	gi|675785945|ref|XP_008950513.1|//PREDICTED: transcription factor SPT20 homolog isoform X7 [Pan paniscus];gi|98961135|ref|NP_001014308.2|//transcription factor SPT20 homolog isoform a [Homo sapiens];gi|8923735|ref|NP_060039.1|//transcription factor SPT20 homolog isoform b [Homo sapiens]
400591	3997	167.28	529.51	1.51831	8.47672e-38	Up	9.04646e-38	C17orf102	NA	NA	NA	NA	gi|149944524|ref|NP_997337.2|//uncharacterized protein C17orf102 [Homo sapiens]
64397	9894	3782.77	11972.2	1.51808	0	Up	0	ZNF106	GO:0031981//nuclear lumen;GO:0044444//cytoplasmic part	GO:0019904//protein domain specific binding;GO:0046914//transition metal ion binding;GO:0005102//receptor binding	GO:0007169//transmembrane receptor protein tyrosine kinase signaling pathway	K10260//F-box and WD-40 domain protein 7;K18188//protein PET117	gi|11968023|ref|NP_071918.1|//zinc finger protein 106 isoform 1 [Homo sapiens];gi|30722348|emb|CAD91149.1|//hypothetical protein [Homo sapiens];gi|546231112|ref|NP_001271236.1|//zinc finger protein 106 isoform 3 [Homo sapiens]
3422	3000	6593	20861	1.51772	0	Up	0	IDI1	GO:0042579//microbody	GO:0043169//cation binding;GO:0016863//intramolecular oxidoreductase activity, transposing C=C bonds	GO:0008203//cholesterol metabolic process;GO:0016109//tetraterpenoid biosynthetic process	K01823//isopentenyl-diphosphate Delta-isomerase [EC:5.3.3.2]	gi|145579638|pdb|2ICJ|A//Chain A, The Crystal Structure Of Human Isopentenyl Diphophate Isomerase;gi|964749142|ref|NP_001304886.1|//isopentenyl-diphosphate Delta-isomerase 1 isoform c [Homo sapiens];gi|410043513|ref|XP_003312477.2|//PREDICTED: isopentenyl-diphosphate Delta-isomerase 1 [Pan troglodytes];gi|81294284|gb|AAI07894.1|//IDI1 protein, partial [Homo sapiens]
55737	5000	1786	5650	1.51743	0	Up	0	VPS35	GO:0043231//intracellular membrane-bounded organelle;GO:0044444//cytoplasmic part	GO:0005488//binding	GO:0016197//endosomal transport	K18468//vacuolar protein sorting-associated protein 35	gi|9622850|gb|AAF89953.1|AF175265_1//vacuolar sorting protein 35 [Homo sapiens]
151888	3124	37	117	1.51683	8.65857e-10	Up	1.59834e-09	BTLA	GO:0009986//cell surface;GO:0016021//integral component of membrane	GO:0004871//signal transducer activity	GO:0030888//regulation of B cell proliferation;GO:0042130//negative regulation of T cell proliferation;GO:0031294//lymphocyte costimulation;GO:0002764//immune response-regulating signaling pathway	K06707//B- and T-lymphocyte attenuator	gi|145580619|ref|NP_001078826.1|//B- and T-lymphocyte attenuator isoform 2 [Homo sapiens];gi|145580621|ref|NP_861445.3|//B- and T-lymphocyte attenuator isoform 1 precursor [Homo sapiens]
9093	2663	31	98	1.51643	1.72191e-08	Up	3.36293e-08	DNAJA3	GO:0005759//mitochondrial matrix;GO:0043234//protein complex;GO:0015629//actin cytoskeleton	GO:0043169//cation binding;GO:0032559//adenyl ribonucleotide binding;GO:0019900//kinase binding;GO:0008134//transcription factor binding;GO:0005126//cytokine receptor binding	GO:0010466//negative regulation of peptidase activity;GO:0006950//response to stress;GO:0016567//protein ubiquitination;GO:0043433//negative regulation of DNA binding transcription factor activity;GO:0033673//negative regulation of kinase activity;GO:0048741//skeletal muscle fiber development;GO:0006915//apoptotic process;GO:0008283//cell proliferation;GO:0007249//I-kappaB kinase/NF-kappaB signal…	K09504//DnaJ homolog subfamily A member 3	gi|205360838|ref|NP_005138.3|//dnaJ homolog subfamily A member 3, mitochondrial isoform 1 [Homo sapiens];gi|557357763|ref|NP_001273445.1|//dnaJ homolog subfamily A member 3, mitochondrial isoform 3 [Homo sapiens];gi|205360840|ref|NP_001128582.1|//dnaJ homolog subfamily A member 3, mitochondrial isoform 2 [Homo sapiens]
10384	2815	636.29	2011.2	1.51621	8.35321e-138	Up	4.69937e-138	BTN3A3	GO:0031224//intrinsic component of membrane	NA	NA	K06712//butyrophilin	gi|686484085|gb|AIP98384.1|//butyrophilin subfamily 3 member A3 secreted isoform [Homo sapiens];gi|5901908|ref|NP_008925.1|//butyrophilin subfamily 3 member A3 isoform a precursor [Homo sapiens]
10126	1504	134	423	1.51434	1.78992e-30	Up	2.10701e-30	DNAL4	GO:0016020//membrane;GO:0005815//microtubule organizing center;GO:0030286//dynein complex;GO:0005930//axoneme	GO:0003774//motor activity;GO:0016887//ATPase activity	GO:0007169//transmembrane receptor protein tyrosine kinase signaling pathway;GO:0007017//microtubule-based process	K10412//dynein light chain 4, axonemal	gi|5031667|ref|NP_005731.1|//dynein light chain 4, axonemal [Homo sapiens]
10419	2538	786	2481	1.51423	3.29166e-169	Up	1.65943e-169	PRMT5	GO:0043231//intracellular membrane-bounded organelle;GO:0044444//cytoplasmic part	GO:0016274//protein-arginine N-methyltransferase activity;GO:0005488//binding	GO:0000398//mRNA splicing, via spliceosome;GO:0034969//histone arginine methylation;GO:0035247//peptidyl-arginine omega-N-methylation;GO:0007067//null	K02516//type II protein arginine methyltransferase [EC:2.1.1.320]	gi|674062681|ref|XP_008838122.1|//PREDICTED: protein arginine N-methyltransferase 5 isoform X1 [Nannospalax galili];gi|545478755|ref|NP_001269885.1|//protein arginine N-methyltransferase 5 isoform f [Homo sapiens];gi|545477926|ref|NP_001269884.1|//protein arginine N-methyltransferase 5 isoform e [Homo sapiens] ;gi|88900507|ref|NP_001034708.1|//protein arginine N-methyltransferase 5 isoform b [Hom…
55677	3000	610	1924	1.51314	1.57797e-131	Up	9.11684e-132	IWS1	GO:0043231//intracellular membrane-bounded organelle	GO:0003676//nucleic acid binding	NA	K17498//transcription factor SPN1	gi|217330641|ref|NP_060439.2|//protein IWS1 homolog [Homo sapiens]
3248	2774	52	164	1.51303	6.03096e-13	Up	9.97707e-13	HPGD	GO:0031981//nuclear lumen;GO:0044444//cytoplasmic part	GO:0016616//oxidoreductase activity, acting on the CH-OH group of donors, NAD or NADP as acceptor;GO:0004955//prostaglandin receptor activity;GO:0042802//identical protein binding;GO:0051287//NAD binding	GO:0000038//very long-chain fatty acid metabolic process;GO:0007178//transmembrane receptor protein serine/threonine kinase signaling pathway;GO:0022414//reproductive process;GO:0051726//regulation of cell cycle;GO:0006692//prostanoid metabolic process	K00069//15-hydroxyprostaglandin dehydrogenase (NAD) [EC:1.1.1.141]	gi|197101813|ref|NP_001125858.1|//15-hydroxyprostaglandin dehydrogenase [NAD(+)] [Pongo abelii];gi|31542939|ref|NP_000851.2|//15-hydroxyprostaglandin dehydrogenase [NAD(+)] isoform 1 [Homo sapiens];gi|372626419|ref|NP_001243235.1|//15-hydroxyprostaglandin dehydrogenase [NAD(+)] isoform 5 [Homo sapiens] ;gi|795293431|ref|XP_011814982.1|//PREDICTED: 15-hydroxyprostaglandin dehydrogenase [NAD(+)] is…
5019	3572	13	41	1.51303	0.000148375	Up	0.000363288	OXCT1	GO:0044429//mitochondrial part	GO:0008410//CoA-transferase activity;GO:0042802//identical protein binding	GO:0048513//animal organ development;GO:0001101//response to acid chemical;GO:0009888//tissue development;GO:0006950//response to stress;GO:0007417//central nervous system development;GO:0050796//regulation of insulin secretion;GO:0001678//cellular glucose homeostasis;GO:0044248//cellular catabolic process;GO:0009719//response to endogenous stimulus;GO:0010033//response to organic substance;GO:00…	K01027//3-oxoacid CoA-transferase [EC:2.8.3.5]	gi|4557817|ref|NP_000427.1|//succinyl-CoA:3-ketoacid coenzyme A transferase 1, mitochondrial precursor [Homo sapiens]
90550	2959	690.3	2173.5	1.51064	5.70702e-148	Up	3.09521e-148	MCU	GO:0031224//intrinsic component of membrane;GO:0043231//intracellular membrane-bounded organelle;GO:0016020//membrane	NA	NA	NA	gi|471401200|ref|XP_004383301.1|//PREDICTED: calcium uniporter protein, mitochondrial [Trichechus manatus latirostris];gi|398303803|ref|NP_001257608.1|//calcium uniporter protein, mitochondrial isoform 2 precursor [Homo sapiens];gi|397490057|ref|XP_003816026.1|//PREDICTED: calcium uniporter protein, mitochondrial [Pan paniscus];gi|587004481|ref|XP_006937924.1|//PREDICTED: calcium uniporter protei…
57541	5496	648.95	2042.85	1.51032	3.76226e-139	Up	2.10496e-139	ZNF398	GO:0043231//intracellular membrane-bounded organelle	GO:0046914//transition metal ion binding;GO:0003676//nucleic acid binding	GO:0006351//transcription, DNA-templated	K09228//KRAB domain-containing zinc finger protein	gi|767948361|ref|XP_011514742.1|//PREDICTED: zinc finger protein 398 isoform X4 [Homo sapiens];gi|25777704|ref|NP_733787.1|//zinc finger protein 398 isoform a [Homo sapiens]
3684	4742	14788.9	35991.4	1.13905	0	Up	0	ITGAM	GO:0043231//intracellular membrane-bounded organelle;GO:0009986//cell surface;GO:0005887//integral component of plasma membrane	GO:0005539//glycosaminoglycan binding;GO:0004871//signal transducer activity;GO:0043394//proteoglycan binding	GO:0042098//T cell proliferation;GO:0016337//null;GO:0030595//leukocyte chemotaxis;GO:0007166//cell surface receptor signaling pathway;GO:0007599//hemostasis	K06461//integrin alpha M	gi|88501734|ref|NP_000623.2|//integrin alpha-M isoform 2 precursor [Homo sapiens];gi|224831239|ref|NP_001139280.1|//integrin alpha-M isoform 1 precursor [Homo sapiens]
64167	5285	607.44	1910.18	1.50881	4.69683e-130	Up	2.73079e-130	ERAP2	GO:0031224//intrinsic component of membrane;GO:0031090//organelle membrane;GO:0044432//endoplasmic reticulum part	GO:0008238//exopeptidase activity;GO:0046914//transition metal ion binding	GO:0008015//blood circulation;GO:0019538//protein metabolic process;GO:0002474//antigen processing and presentation of peptide antigen via MHC class I	K13723//endoplasmic reticulum aminopeptidase 2 [EC:3.4.11.-]	gi|40807029|gb|AAH65240.1|//ERAP2 protein [Homo sapiens];gi|119616488|gb|EAW96082.1|//leukocyte-derived arginine aminopeptidase, isoform CRA_c [Homo sapiens];gi|119616487|gb|EAW96081.1|//leukocyte-derived arginine aminopeptidase, isoform CRA_b [Homo sapiens];gi|931139995|pdb|5AB2|A//Chain A, Crystal Structure Of Aminopeptidase Erap2 With Ligand
8350	469	14	44	1.50799	9.49532e-05	Up	0.000229179	HIST1H3A	NA	NA	NA	K11254//histone H4;K11253//histone H3	gi|880967054|ref|XP_012981125.1|//PREDICTED: LOW QUALITY PROTEIN: histone H3-like centromeric protein CSE4 [Mesocricetus auratus]
4048	2204	2015.06	7116.01	1.67616	0	Up	0	LTA4H	GO:0031981//nuclear lumen;GO:0044444//cytoplasmic part	GO:0070011//peptidase activity, acting on L-amino acid peptides;GO:0046914//transition metal ion binding;GO:0016803//ether hydrolase activity	GO:0006691//leukotriene metabolic process;GO:0009058//biosynthetic process;GO:0019538//protein metabolic process;GO:0006952//defense response;GO:0009725//response to hormone;GO:0060487//lung epithelial cell differentiation;GO:0010038//response to metal ion	K01254//leukotriene-A4 hydrolase [EC:3.3.2.6]	gi|955264593|pdb|4R7L|A//Chain A, Structure Of Human Leukotriene A4 Hydrolase In Complex With Inhibitor H1;gi|375331879|ref|NP_001243572.1|//leukotriene A-4 hydrolase isoform 2 [Homo sapiens]
51202	1726	64	201	1.50697	2.26147e-15	Up	3.51874e-15	DDX47	GO:0031981//nuclear lumen	GO:0032559//adenyl ribonucleotide binding;GO:0042623//ATPase activity, coupled;GO:0003676//nucleic acid binding	NA	K14777//ATP-dependent RNA helicase DDX47/RRP3 [EC:3.6.4.13]	gi|20149629|ref|NP_057439.2|//probable ATP-dependent RNA helicase DDX47 isoform 1 [Homo sapiens];gi|41327776|ref|NP_957518.1|//probable ATP-dependent RNA helicase DDX47 isoform 2 [Homo sapiens]
57215	1903	134.28	421.7	1.50689	3.52648e-30	Up	4.16706e-30	THAP11	GO:0043231//intracellular membrane-bounded organelle	GO:0043169//cation binding;GO:0005515//protein binding;GO:0003676//nucleic acid binding	NA	NA	gi|119603586|gb|EAW83180.1|//THAP domain containing 11, partial [Homo sapiens]
29095	1361	233.04	730.22	1.50367	1.1089e-50	Up	1.02178e-50	ORMDL2	GO:0043231//intracellular membrane-bounded organelle;GO:0031224//intrinsic component of membrane;GO:0031090//organelle membrane	NA	GO:0046519//sphingoid metabolic process	K12667//oligosaccharyltransferase complex subunit delta (ribophorin II)	gi|725595571|ref|XP_010348246.1|//PREDICTED: ORM1-like protein 2 [Saimiri boliviensis boliviensis]
79541	1758	13	40.72	1.50314	0.000165428	Up	0.000406158	OR2A4	GO:0031224//intrinsic component of membrane	GO:0004930//G-protein coupled receptor activity	GO:0007606//sensory perception of chemical stimulus	K04257//olfactory receptor	gi|13929212|ref|NP_112170.1|//olfactory receptor 2A4 [Homo sapiens]
146722	1840	2552.02	7989.04	1.5023	0	Up	0	CD300LF	GO:0031224//intrinsic component of membrane	GO:0004871//signal transducer activity	NA	K20395//CO300B/D/F antigen	gi|574277759|ref|NP_001276013.1|//CMRF35-like molecule 1 isoform 4 [Homo sapiens];gi|574277903|ref|NP_001276014.1|//CMRF35-like molecule 1 isoform 5 [Homo sapiens];gi|574277434|ref|NP_001276011.1|//CMRF35-like molecule 1 isoform 2 [Homo sapiens];gi|38455398|ref|NP_620587.2|//CMRF35-like molecule 1 isoform 1 precursor [Homo sapiens];gi|767993675|ref|XP_011522676.1|//PREDICTED: CMRF35-like molecule…
10460	2847	4538	14193	1.50097	0	Up	0	TACC3	GO:0005815//microtubule organizing center	GO:0005515//protein binding	GO:0021543//pallium development;GO:0021846//cell proliferation in forebrain;GO:0007051//spindle organization;GO:0042992//negative regulation of transcription factor import into nucleus;GO:0050896//response to stimulus;GO:0048534//hematopoietic or lymphoid organ development	K14283//transforming acidic coiled-coil-containing protein 3	gi|5454102|ref|NP_006333.1|//transforming acidic coiled-coil-containing protein 3 [Homo sapiens]
151827	1755	16	50	1.49977	3.89234e-05	Up	9.16047e-05	LRRC34	NA	NA	NA	K08727//nucleotide-binding oligomerization domain-containing protein 1;K07374//tubulin alpha;K17576//protein phosphatase 1 regulatory subunit 37	gi|289666780|ref|NP_001166250.1|//leucine-rich repeat-containing protein 34 isoform 2 [Homo sapiens];gi|289666782|ref|NP_001166251.1|//leucine-rich repeat-containing protein 34 isoform 1 [Homo sapiens];gi|289666778|ref|NP_699184.2|//leucine-rich repeat-containing protein 34 isoform 3 [Homo sapiens]
10598	1429	269	840	1.4987	9.82537e-58	Up	8.51778e-58	AHSA1	GO:0043231//intracellular membrane-bounded organelle;GO:0044444//cytoplasmic part	GO:0005515//protein binding;GO:0008047//enzyme activator activity	GO:0044267//cellular protein metabolic process;GO:0050896//response to stimulus	NA	gi|6912280|ref|NP_036243.1|//activator of 90 kDa heat shock protein ATPase homolog 1 [Homo sapiens]
51348	1266	49	153	1.49859	4.70236e-12	Up	7.98001e-12	KLRF1	GO:0016021//integral component of membrane	GO:0030246//carbohydrate binding;GO:0004888//transmembrane signaling receptor activity	GO:0007165//signal transduction	K10075//killer cell lectin-like receptor subfamily F member 1	gi|625180299|ref|NP_001278751.1|//killer cell lectin-like receptor subfamily F member 1 isoform KLRF1-s [Homo sapiens];gi|675792853|ref|XP_008953248.1|//PREDICTED: killer cell lectin-like receptor subfamily F member 1 isoform X2 [Pan paniscus];gi|675792862|ref|XP_008953253.1|//PREDICTED: killer cell lectin-like receptor subfamily F member 1 isoform X6 [Pan paniscus];gi|397519070|ref|XP_003829695.…
4502	466	1496.77	4671.24	1.49787	0	Up	0	MT2A	NA	GO:0005488//binding	GO:0007165//signal transduction;GO:0042221//response to chemical	K14739//metallothionein 1/2	gi|635116499|ref|XP_007981228.1|//PREDICTED: metallothionein-2-like [Chlorocebus sabaeus]
10130	2349	230.46	718.85	1.49709	1.29687e-49	Up	1.21028e-49	PDIA6	GO:0016020//membrane;GO:0044432//endoplasmic reticulum part;GO:0048770//pigment granule	GO:0015036//disulfide oxidoreductase activity;GO:0016862//intramolecular oxidoreductase activity, interconverting keto- and enol-groups;GO:0005488//binding	GO:0044267//cellular protein metabolic process;GO:0019725//cellular homeostasis;GO:0018904//ether metabolic process	K09584//protein disulfide-isomerase A6 [EC:5.3.4.1]	gi|544186040|ref|NP_001269636.1|//protein disulfide-isomerase A6 isoform e precursor [Homo sapiens] ;gi|544186046|ref|NP_001269634.1|//protein disulfide-isomerase A6 isoform b [Homo sapiens];gi|544186032|ref|NP_001269633.1|//protein disulfide-isomerase A6 isoform a [Homo sapiens]
10946	2856	1345.96	4198.27	1.49707	3.19583e-280	Up	1.19442e-280	SF3A3	GO:0005681//spliceosomal complex;GO:0016604//nuclear body	GO:0046914//transition metal ion binding	GO:0006376//mRNA splice site selection	K12827//splicing factor 3A subunit 3	gi|667261609|ref|XP_008567668.1|//PREDICTED: splicing factor 3A subunit 3 [Galeopterus variegatus]
91607	5122	110.61	344.79	1.49615	8.87095e-25	Up	1.13524e-24	SLFN11	GO:0043231//intracellular membrane-bounded organelle	GO:0032559//adenyl ribonucleotide binding	NA	NA	gi|157388957|ref|NP_001098057.1|//schlafen family member 11 [Homo sapiens]
[truncated: 2,502 more rows]
