# Supplementary material for: Abnormal Peripheral Neutrophil Transcriptome in Newly Diagnosed Type 2 Diabetes Patients
Source: J Diabetes Res. 2020 Apr 22;2020:9519072. doi: 10.1155/2020/9519072 (PMC7195634; doi:10.1155/2020/9519072)
Supplement: Supplementary 2 — Supplementary Data 2: information of main pathways identified in KEGG. [file 9519072.f2.xls]

## Sheet: Sheet1
#Pathway	HC-VS-T2D.DEGseq_Method (2944)	All-gene (19718)	Pvalue	Qvalue	Pathway ID	Level 1	Level 2	Genes	KOs
Cytokine-cytokine receptor interaction	85	292	3.46182e-10	1.10086e-07	ko04060	Environmental Information Processing	Signaling molecules and interaction	3576;3553;3579;7852;6349;6348;414062;6351;9560;3577;5008;388372;3460;3587;23765;7422;58191;8740;8743;3570;7124;7132;3554;7048;1230;8764;8807;10673;3552;7046;1435;23529;4055;1232;943;1524;3575;1440;79811;6364;2057;1436;8742;91;51330;51561;3560;3976;400935;9180;9966;643;27189;3563;3606;2323;8718;939;90;64109;3593;10148;6363;4233;3082;5473;8690;3569;407977;7292;8200;6362;959;4049;3574;5196;8600;1236…	K10030+K04519+K05050+K04189+K05408+K12964+K04175+K05418+K05133+K05134+K05164+K05448+K10035+K05477+K04721+K05055+K03156+K03158+K04386+K04388+K04176+K05152+K05174+K05476+K04383+K04674+K05453+K05421+K03159+K04178+K05145+K04192+K05072+K05423+K05090+K14625+K05079+K05474+K13567+K05149+K05426+K05069+K05419+K05168+K05057+K05478+K04190+K05491+K04737+K05482+K05454+K05160+K05144+K04675+K05078+K05425+K05059+…
NF-kappa B signaling pathway	47	133	4.1234e-09	6.5562e-07	ko04064	Environmental Information Processing	Signal transduction	3576;7128;4792;3553;5328;3383;4791;6351;9560;597;388372;7706;7185;4790;414236;330;8740;3654;7124;148022;7132;3554;7187;5971;23586;10673;329;4055;472;695;3932;7535;1457;8717;79092;5335;84433;84859;445347;6363;596;401124;959;4049;8600;958;9143	K10030+K11859+K04734+K04519+K01348+K06490+K04469+K12964+K02162+K10652+K03172+K02580+K16060+K05477+K04730+K03156+K05842+K03158+K04386+K03174+K09253+K12646+K05476+K03159+K04728+K07370+K05856+K07360+K03097+K03171+K07367+K01116+K10130+K10785+K05512+K02161+K03161+K05468+K05473+K03160+K04403
Osteoclast differentiation	56	195	5.49088e-07	5.82033e-05	ko04380	Organismal Systems	Development	4792;3553;653361;3937;4791;2215;23533;8878;3460;9021;4790;3725;10288;2214;11025;4689;5594;1536;11027;79168;11026;7124;7132;3554;7048;5971;353514;126014;3552;2210;7046;1435;11024;2209;55665;79811;695;2213;1436;10990;8651;3932;5532;79153;2534;1513;4773;23547;90378;55423;10000;8600;9143;3690;7042;10750	K04734+K04519+K08011+K07361+K04469+K06463+K02649+K14381+K05133+K04696+K02580+K04448+K06512+K08012+K04371+K08008+K03156+K03158+K04386+K04388+K09253+K14377+K04383+K06498+K04674+K05453+K06551+K05090+K07370+K12560+K04694+K05856+K04348+K05703+K01371+K17332+K04431+K04456+K05473+K04403+K06493+K13376+K04364
Malaria	25	65	2.95475e-06	0.000234903	ko05144	Human Diseases	Infectious diseases: Parasitic	3576;3553;3383;6653;5175;1378;7124;1440;54106;3606;6403;7057;3820;975;22914;445347;4233;3082;3569;100528032;959;6347;958;6382;7042	K10030+K04519+K06490+K04550+K06471+K04011+K03156+K05423+K10161+K05482+K06496+K16857+K06543+K06508+K06728+K10785+K05099+K05460+K05405+K03161+K14624+K03160+K06257+K13376
Rheumatoid arthritis	35	109	4.79569e-06	0.000305006	ko05323	Human Diseases	Immune diseases	3576;3553;3383;6349;6348;414062;3725;7422;537;7124;10673;3552;3122;1435;528;9296;6364;51561;3117;1513;3606;445347;7010;3113;3115;1493;3569;155066;407977;6374;8600;6347;941;245973;7042	K10030+K04519+K06490+K05408+K04448+K05448+K03662+K03156+K05476+K04383+K06752+K05453+K02148+K02151+K14625+K05426+K01371+K05482+K10785+K05121+K06538+K05405+K02153+K05475+K05506+K05473+K14624+K05412+K13376
MicroRNAs in cancer	61	238	1.06111e-05	0.000562386	ko05206	Human Diseases	Cancers: Overview	5328;4082;117289;359948;4790;7422;9839;51307;414236;1026;90427;1027;55784;3678;340527;3845;324;10018;79903;472;1399;2146;1788;6654;6461;994;8651;90780;4855;578;5335;1545;672;50861;10298;9649;55691;7057;94059;1591;1021;100532731;4609;4233;23412;596;6541;648;53834;57493;5243;1956;8434;4854;9493;387921;3690;7042;10642;10750;115265	K01348+K12561+K08007+K04498+K02580+K05448+K09299+K05867+K06625+K17460+K06624+K02677+K06484+K07187+K07827+K02085+K16341+K14021+K04728+K04438+K11430+K17398+K03099+K06619+K05866+K04694+K06279+K02599+K01116+K07410+K10605+K04381+K05734+K05762+K16857+K19663+K07436+K02091+K11459+K04377+K05099+K02161+K13863+K05094+K05658+K04361+K17461+K17387+K12035+K06493+K13376+K17391+K04364+K08270
Cell adhesion molecules (CAMs)	58	226	1.65692e-05	0.000752715	ko04514	Environmental Information Processing	Signaling molecules and interaction	3383;6402;120425;5175;6404;3684;64101;3122;23308;84628;8904;3676;29126;3135;8895;923;9080;914;925;3695;24146;933;3117;8174;10205;3696;6403;926;6614;201633;60437;6385;92340;3384;1000;445347;57633;3113;4756;3077;3115;1493;29851;5792;151835;959;26047;10666;1272;958;6382;4897;941;80380;54674;9076;23562;5797	K06490+K06495+K06770+K06471+K06544+K06461+K16351+K06752+K06710+K16359+K06491+K06483+K06745+K06751+K06456+K06087+K06449+K06458+K06590+K06467+K06779+K06591+K06496+K06459+K06548+K16350+K06736+K16338+K06523+K10785+K07523+K06766+K06538+K06713+K05695+K03161+K07380+K06567+K06759+K03160+K06257+K06756+K05412+K06708+K05693
Chagas disease (American trypanosomiasis)	40	140	2.46388e-05	0.000799106	ko05142	Human Diseases	Infectious diseases: Parasitic	3576;4792;3553;6349;6348;414062;23533;3460;4790;3725;5594;10333;3654;5330;7124;148022;7132;7048;7046;6416;2769;4088;718;916;54106;79153;915;8772;919;3593;5516;445347;3569;10000;2767;1636;2775;6347;4843;7042	K10030+K04734+K04519+K05408+K02649+K05133+K02580+K04448+K04371+K10169+K04730+K05858+K03156+K05842+K03158+K04388+K04674+K04430+K04637+K04500+K03990+K06451+K10161+K06450+K02373+K06453+K05425+K04382+K10785+K05405+K04456+K04635+K01283+K04534+K14624+K13241+K13376
Th17 cell differentiation	40	140	2.46388e-05	0.000799106	ko04659	Organismal Systems	Immune system	4792;3553;3091;3460;4794;4790;3725;6776;3718;5594;3570;3554;7048;4793;3122;7046;3717;4088;6257;916;51561;3560;6095;3932;5532;79153;7535;5335;3117;915;2625;4773;30009;919;445347;3113;3115;3569;50943;6097	K04734+K04519+K08268+K05133+K05872+K02580+K04448+K11223+K11218+K04371+K05055+K04386+K04388+K02581+K06752+K04674+K04447+K04500+K08525+K06451+K05426+K05069+K08532+K05856+K04348+K07360+K01116+K06450+K17895+K17332+K10166+K06453+K10785+K05405+K10163+K08534
NOD-like receptor signaling pathway	58	229	2.51291e-05	0.000799106	ko04621	Organismal Systems	Immune system	3576;7128;4792;3553;4332;2920;4790;3725;114548;10010;4671;330;5594;3428;1536;5330;837;7124;148022;22900;7187;8767;29110;10616;4793;329;171389;91662;4939;55665;10059;838;84674;9725;55362;6041;27245;340061;7226;2921;79671;7205;79153;51393;9447;820;3606;8772;3710;9641;10392;149628;440068;596;3569;6347;9143;151827	K10030+K11859+K04734+K04519+K12966+K05505+K02580+K04448+K12800+K12650+K12807+K16060+K04371+K08008+K05858+K04394+K03156+K05842+K12801+K03174+K08846+K05410+K10630+K02581+K14216+K12797+K17065+K04395+K10165+K01165+K06030+K12654+K04977+K12653+K12792+K04971+K13916+K05482+K02373+K04960+K07211+K08727+K01370+K02161+K05405+K14624+K04403
T cell receptor signaling pathway	43	158	4.52016e-05	0.00130674	ko04660	Organismal Systems	Immune system	4792;3937;23533;4794;4790;3725;5594;7409;1326;5062;7124;867;4793;3845;916;6654;6461;3932;3702;5532;79153;925;7535;4690;2534;6641;79092;5335;10298;9649;915;84433;926;4773;919;9402;445347;90378;1493;29851;10000;959;10750	K04734+K07361+K02649+K05872+K02580+K04448+K04371+K05730+K04415+K04410+K03156+K04707+K02581+K07827+K06451+K03099+K19862+K05856+K07363+K04348+K06458+K07360+K07365+K05703+K12076+K07367+K01116+K05734+K06450+K06459+K17332+K06453+K07366+K10785+K04431+K06538+K06713+K04456+K03161+K04364
TNF signaling pathway	43	160	6.23032e-05	0.00165103	ko04668	Environmental Information Processing	Signal transduction	7128;4792;3553;3383;23533;9586;7185;9021;2920;4790;3725;5606;330;5594;1326;7124;7132;1906;7187;1435;329;1388;6416;10059;6364;9725;55362;64764;2921;3976;79153;8717;8772;51015;56269;90378;3569;4323;10000;4049;6347;9143;341405	K11859+K04734+K04519+K06490+K02649+K09047+K03172+K04696+K05505+K02580+K04448+K04432+K16060+K04371+K04415+K03156+K03158+K16366+K03174+K05453+K09049+K04430+K17065+K14625+K10165+K09048+K05419+K03171+K02373+K17072+K04431+K05405+K07763+K04456+K05468+K14624+K04403+K09258
Leishmaniasis	31	105	9.93603e-05	0.00243051	ko05140	Human Diseases	Infectious diseases: Parasitic	4792;3553;653361;2215;3460;4790;3725;1378;2214;4689;5594;3684;3654;7124;3552;4793;2210;3122;3717;2209;2002;718;3676;79153;3117;3593;3113;3115;4843;9143;7042	K04734+K04519+K08011+K06463+K05133+K02580+K04448+K04011+K08012+K04371+K06461+K04730+K03156+K04383+K02581+K06498+K06752+K04447+K04375+K03990+K06483+K05425+K13241+K04403+K13376
Inflammatory bowel disease (IBD)	26	85	0.000187113	0.00425014	ko05321	Human Diseases	Immune diseases	3553;3460;4790;3725;7124;8807;3552;3122;7100;4088;9725;55362;51561;6095;3117;3606;30009;3593;445347;3113;3115;4094;3569;50943;6097;7042	K04519+K05133+K02580+K04448+K03156+K05174+K04383+K06752+K10168+K04500+K10165+K05426+K08532+K05482+K10166+K05425+K10785+K09035+K05405+K10163+K08534+K13376
Hematopoietic cell lineage	44	173	0.000204004	0.00432489	ko04640	Organismal Systems	Immune system	3553;9750;1604;4311;1378;3684;3570;7124;3554;3678;3552;2210;3122;1435;2209;3676;3575;1440;916;79811;2057;1436;54953;914;3672;925;933;921;3117;945;915;3563;2323;926;3113;3115;3569;2812;3574;3675;3568;931;1380;3690	K04519+K04006+K01389+K04011+K06461+K05055+K03156+K04386+K06484+K04383+K06498+K06752+K05453+K06483+K05072+K05423+K06451+K05090+K05079+K06449+K06480+K06458+K06467+K06455+K06473+K06450+K04737+K05454+K06459+K05405+K06262+K05431+K06482+K05067+K06466+K04012+K06493
Toll-like receptor signaling pathway	39	150	0.000281548	0.00546387	ko04620	Organismal Systems	Immune system	3576;4792;3553;6349;6348;414062;6351;9560;23533;388372;4790;3725;5606;7096;5594;10333;3654;51311;1326;7124;148022;7187;29110;6416;7100;3663;54106;79153;1513;8772;9641;51015;3593;90378;3569;10000;958;9143;941	K10030+K04734+K04519+K05408+K12964+K02649+K02580+K04448+K04432+K05398+K04371+K10169+K04730+K10170+K04415+K03156+K05842+K03174+K05410+K04430+K10168+K09446+K10161+K01371+K02373+K07211+K05425+K04431+K05405+K04456+K03160+K04403+K05412
Natural killer cell mediated cytotoxicity	45	181	0.000301358	0.00546387	ko04650	Organismal Systems	Immune system	3383;3937;2215;23533;8794;3460;2214;5594;8743;7409;7124;637;55784;3845;10870;673;6654;3802;5551;8793;90780;3809;3932;5532;79153;3804;7535;2534;3805;5335;9649;4773;919;100132285;3803;94059;92340;3384;22914;9437;3002;4068;100528032;353091;10750	K06490+K07361+K06463+K02649+K04722+K05133+K04371+K04721+K05730+K03156+K04726+K02677+K07827+K07988+K04365+K03099+K07981+K07818+K06279+K07982+K05856+K04348+K07360+K05703+K01116+K17332+K06453+K19663+K06523+K06728+K06741+K01353+K07990+K07987+K04364
Chemokine signaling pathway	61	266	0.000325224	0.00546387	ko04062	Organismal Systems	Immune system	3576;4792;653361;3579;7852;6349;6348;414062;6351;9560;3577;23533;54331;388372;5829;2920;4790;58191;3718;5594;3987;7409;5330;2790;1230;4793;3717;3845;113;1232;1399;673;1524;6364;6654;6714;9475;2921;115;90780;3702;79153;643;9649;96626;6363;7041;5567;5473;7074;51299;10000;552891;6374;6362;5196;1236;6347;2833;6368;10750	K10030+K04734+K08011+K05050+K04189+K05408+K12964+K04175+K02649+K07826+K05760+K05505+K02580+K10035+K11218+K04371+K05730+K05858+K04545+K04176+K02581+K04447+K07827+K08047+K04178+K04438+K04365+K04192+K14625+K03099+K05704+K17388+K08049+K06279+K07363+K04190+K05512+K04345+K10029+K05731+K05726+K04456+K05506+K05514+K05407+K04182+K14624+K04188+K05511+K04364
ErbB signaling pathway	36	136	0.000326458	0.00546387	ko04012	Environmental Information Processing	Signal transduction	23533;3725;6776;5594;1026;5062;1027;55784;867;3845;7039;6416;2002;1399;673;2069;6654;2549;6714;6199;6461;90780;79153;4690;5335;10298;9649;1839;94059;4609;815;90378;10000;817;1956;10750	K02649+K04448+K11223+K04371+K06625+K04410+K06624+K02677+K04707+K07827+K08774+K04430+K04375+K04438+K04365+K09784+K03099+K09593+K05704+K04688+K19862+K06619+K06279+K07365+K01116+K05734+K08523+K19663+K04377+K04515+K04431+K04456+K04361+K04364
Toxoplasmosis	42	167	0.000362805	0.0057686	ko05145	Human Diseases	Infectious diseases: Parasitic	4792;3460;3587;4790;5606;1955;10105;240;3303;330;5594;3914;3310;3654;7124;7132;3949;4793;3122;329;3717;3304;8651;79153;3918;22798;3117;3306;51015;3593;3911;3113;3115;3915;596;10000;959;2775;958;4843;9143;7042	K04734+K05133+K05134+K02580+K04432+K06243+K09565+K00461+K03283+K16060+K04371+K06244+K04730+K03156+K03158+K12473+K02581+K06752+K04447+K04694+K06246+K06245+K05425+K06240+K05635+K02161+K04456+K03161+K04534+K03160+K13241+K04403+K13376
TGF-beta signaling pathway	33	124	0.000510496	0.00773036	ko04350	Environmental Information Processing	Signal transduction	359948;3398;5594;6667;7124;7048;7050;60436;7046;7027;4088;6199;100527943;91;4092;79153;650;7057;10272;90;5516;3625;83729;4609;3624;25805;8200;3399;3626;130399;10637;11167;7042	K04498+K17693+K04371+K04684+K03156+K04388+K19383+K19553+K04674+K04683+K04500+K04688+K13567+K19631+K04662+K16857+K04661+K04675+K04382+K04667+K04377+K10162+K04664+K17694+K13568+K04668+K13376
Staphylococcus aureus infection	25	88	0.000843307	0.0121896	ko05150	Human Diseases	Infectious diseases: Bacterial	3383;2215;2204;5724;6404;2214;3684;719;51279;2210;3122;2209;718;2213;3117;6403;100293534;81606;10747;445347;3113;3115;5343;629;3075	K06490+K06463+K06513+K04279+K06544+K06461+K04009+K01330+K06498+K06752+K03990+K12560+K06496+K03989+K04010+K03993+K10785+K01315+K01335+K04004
Legionellosis	28	103	0.00091502	0.0126511	ko05134	Human Diseases	Infectious diseases: Bacterial	3576;4792;3553;4791;2920;4790;1378;4671;3303;3310;3684;7124;317;7100;718;9554;51427;1937;3304;2921;3306;100507027;3606;3593;84159;440068;3569;100506164	K10030+K04734+K04519+K04469+K05505+K02580+K04011+K12807+K03283+K06461+K03156+K02084+K10168+K03990+K08517+K15464+K03233+K14416+K05482+K05425+K07874+K01370+K05405+K09414
Insulin resistance	36	144	0.00103091	0.0136595	ko04931	Human Diseases	Endocrine and metabolic diseases	4792;23533;9586;9021;4790;79660;5836;7124;7132;8473;340527;6197;5499;6720;5509;1375;2308;5501;5562;6513;5571;25959;6199;56946;11000;64764;4846;9882;79573;83694;3569;5792;10000;84899;10062;11001	K04734+K02649+K09047+K04696+K02580+K07189+K00688+K03156+K03158+K09667+K07187+K04373+K06269+K07197+K19523+K07201+K07198+K07299+K07200+K04688+K08772+K09048+K13242+K17902+K05405+K05695+K04456+K08536+K08746
HIF-1 signaling pathway	39	160	0.00109861	0.0139743	ko04066	Environmental Information Processing	Signal transduction	23533;3091;3460;359948;4790;7422;10875;5594;1026;1536;54583;3570;1027;1906;55784;7428;317649;3101;4055;405;6513;6199;5160;79153;5335;4846;94059;2026;7010;815;2027;596;3569;10000;817;1956;4878;4843;128178	K02649+K08268+K05133+K04498+K02580+K05448+K05466+K04371+K06625+K08008+K09592+K05055+K06624+K16366+K02677+K03871+K03259+K00844+K03159+K09097+K07299+K04688+K00161+K01116+K13242+K19663+K01689+K05121+K04515+K02161+K05405+K04456+K04361+K12334+K13241
Th1 and Th2 cell differentiation	34	136	0.00139868	0.017107	ko04658	Organismal Systems	Immune system	4792;3460;4794;4790;3725;6776;3718;5594;4793;3122;3717;916;3560;3932;5532;79153;7535;4855;5335;3117;915;2625;4773;30009;919;3593;445347;28514;3113;3115;4094;54567;57493;4854	K04734+K05133+K05872+K02580+K04448+K11223+K11218+K04371+K02581+K06752+K04447+K06451+K05069+K05856+K04348+K07360+K02599+K01116+K06450+K17895+K17332+K10166+K06453+K05425+K10785+K06051+K09035
MAPK signaling pathway - fly	36	148	0.00173372	0.0204194	ko04013	Environmental Information Processing	Signal transduction	6648;3725;2114;5606;5594;3845;6416;6801;10527;673;7514;6654;166;83985;6714;6477;5921;11221;51619;55715;90780;51513;79153;9046;9649;650;7088;51015;5516;23043;22874;57664;90378;1956;7089;10750	K04564+K04448+K02678+K04432+K04371+K07827+K04430+K17608+K20223+K04365+K14290+K03099+K04497+K20225+K05704+K04506+K04352+K20216+K06689+K20234+K06279+K03211+K04662+K04382+K08840+K17536+K04431+K04361+K04364
Measles	42	180	0.00180751	0.0205281	ko05162	Human Diseases	Infectious diseases: Viral	7128;4792;3553;23533;8794;3460;4790;6776;3303;3718;3310;8743;3654;1027;29110;23586;3552;4793;9451;3717;64135;4939;916;3304;2213;54106;3560;8793;6504;55715;1457;2534;3306;55691;915;9641;3593;445347;1021;4068;3569;10000	K11859+K04734+K04519+K02649+K04722+K05133+K02580+K11223+K03283+K11218+K04721+K04730+K06624+K05410+K12646+K04383+K02581+K08860+K04447+K12647+K14216+K06451+K12560+K10161+K05069+K06536+K14752+K03097+K05703+K05763+K06450+K07211+K05425+K10785+K02091+K07990+K05405+K04456
FoxO signaling pathway	43	191	0.00329528	0.0361344	ko04068	Environmental Information Processing	Signal transduction	6648;4616;23533;1263;6446;604;359948;5594;1026;1032;8743;1027;10769;7048;149478;847;5934;340527;7046;8698;3845;10018;472;4088;2308;51427;673;5562;3575;6654;1454;5571;79153;9649;1901;114907;9456;3569;10000;1956;7042;255877;10750	K04564+K04402+K02649+K08862+K13302+K15618+K04498+K04371+K06625+K06623+K04721+K06624+K08861+K04388+K03781+K16332+K07187+K04674+K04293+K07827+K16341+K04728+K04500+K07201+K15464+K04365+K07198+K05072+K03099+K08960+K07200+K04288+K10305+K15010+K05405+K04456+K04361+K13376+K04364
Gap junction	29	119	0.00447447	0.0474294	ko04540	Cellular Processes	Cellular community - eukaryotes	7846;10376;5594;7277;5330;55784;3845;113;6654;6903;84790;6714;115;79153;9649;3710;2983;94059;5567;81027;2767;7082;1956;151827;3356;347688;2697;10381;10750	K07374+K04371+K05858+K02677+K07827+K08047+K03099+K05704+K08049+K04960+K12319+K19663+K04345+K07375+K04635+K05701+K04361+K04157+K07372+K04364
Intestinal immune network for IgA production	18	64	0.00478728	0.0491082	ko04672	Organismal Systems	Immune system	7852;10673;3122;23308;4055;3676;3695;3117;8174;445347;3113;3115;29851;3569;407977;959;958;941	K04189+K05476+K06752+K06710+K03159+K06483+K06590+K06779+K10785+K06713+K05405+K05475+K03161+K03160+K05412
Systemic lupus erythematosus	38	171	0.0068516	0.0680877	ko05322	Human Diseases	Immune diseases	2215;87;2214;7124;51279;2210;3122;2209;6737;718;3017;8364;3117;100293534;445347;8365;3113;3077;3115;8339;8357;959;8343;8370;554313;8362;474382;8330;3012;317772;958;653604;83740;8350;941;3013;8969;8348	K06463+K05699+K03156+K01330+K06498+K06752+K10651+K03990+K11252+K11254+K03989+K10785+K11253+K03161+K11251+K03160+K05412
Renal cell carcinoma	26	108	0.00809249	0.0778684	ko05211	Human Diseases	Cancers: Specific types	23533;3091;359948;3725;7422;5594;54583;5062;7428;3845;7039;153020;1399;673;6654;2549;405;6513;79153;10298;9649;4233;3082;10000;7042;10750	K02649+K08268+K04498+K04448+K05448+K04371+K09592+K04410+K03871+K07827+K08774+K06277+K04438+K04365+K03099+K09593+K09097+K07299+K05734+K05099+K05460+K04456+K13376+K04364
AGE-RAGE signaling pathway in diabetic complications	38	173	0.00832555	0.0778684	ko04933	Human Diseases	Endocrine and metabolic diseases	3576;3553;3383;23533;4790;3725;7422;6776;7056;5594;1536;5330;7124;1027;1906;7048;55784;3552;7046;3717;3845;4088;2308;1277;2152;100170841;79153;5335;1284;2335;170463;4846;596;3569;10000;8292;6347;7042	K10030+K04519+K06490+K02649+K02580+K04448+K05448+K11223+K03907+K04371+K08008+K05858+K03156+K06624+K16366+K04388+K02677+K04383+K04674+K04447+K07827+K04500+K07201+K06236+K03901+K19720+K06237+K01116+K05717+K13242+K02161+K05405+K04456+K14624+K13376
Tuberculosis	68	347	0.0103167	0.0937343	ko05152	Human Diseases	Infectious diseases: Bacterial	3553;2215;3656;1263;3460;3587;359948;4790;11151;1378;7096;2214;26253;5594;537;3684;10333;3654;7124;7132;637;8877;8767;79415;149478;5869;317;3552;55729;2210;805;3122;3717;9852;4800;2209;5993;84034;63901;718;1810;9725;6714;55362;2213;54106;254013;51561;5532;79153;8717;820;3117;3606;8772;3593;3113;815;3115;64864;596;3569;10000;817;285782;23365;4843;7042	K04519+K06463+K04731+K08862+K05133+K05134+K04498+K02580+K13882+K04011+K05398+K10059+K04371+K03662+K06461+K10169+K04730+K03156+K03158+K04726+K04718+K08846+K01368+K07888+K02084+K04383+K06498+K02183+K06752+K04447+K08064+K08061+K12478+K03990+K08065+K10165+K05704+K12560+K10161+K05426+K04348+K03171+K13916+K05482+K02373+K05425+K04515+K02161+K05405+K04456+K07532+K13241+K13376
Epithelial cell signaling in Helicobacter pylori infection	21	86	0.0137987	0.121888	ko05120	Human Diseases	Infectious diseases: Bacterial	3576;4792;3579;3577;4790;3725;537;528;102;6416;9296;6714;5335;1839;10392;4233;155066;7082;1956;151827;245973	K10030+K04734+K05050+K04175+K02580+K04448+K03662+K02148+K06704+K04430+K02151+K05704+K01116+K08523+K08727+K05099+K02153+K05701+K04361
Type I diabetes mellitus	18	71	0.0148047	0.127241	ko04940	Human Diseases	Endocrine and metabolic diseases	3553;7124;3552;3122;5799;23042;3135;5551;3117;3593;445347;3002;3113;3077;3115;3382;4049;941	K04519+K03156+K04383+K06752+K07817+K01580+K06751+K07818+K05425+K10785+K01353+K19863+K05468+K05412
Apoptosis	60	307	0.0160239	0.134095	ko04210	Cellular Processes	Cell growth and death	4792;60;7846;4616;23533;8794;597;7185;10376;4790;3725;330;5594;7277;8743;7124;1649;7132;637;79415;317;55729;9451;329;823;3845;9852;1522;84823;10018;79903;472;63901;5366;835;6903;84790;254013;5551;8793;79153;578;8717;1513;1521;3563;8772;3710;84859;3002;596;1519;63970;401124;10000;8739;8722;151827;5414;23089	K04734+K05692+K07374+K04402+K02649+K04722+K02162+K03172+K02580+K04448+K16060+K04371+K04721+K03156+K04452+K03158+K04726+K01368+K02084+K08860+K01367+K07827+K08568+K07611+K16341+K14021+K04728+K10131+K02186+K07818+K03171+K01371+K08569+K04737+K02373+K04960+K10130+K01353+K02161+K01374+K13773+K04456+K02512+K01373+K16943+K10798
Cytosolic DNA-sensing pathway	21	88	0.017799	0.14513	ko04623	Organismal Systems	Immune system	4792;3553;4332;6351;9560;388372;4790;3428;29110;23586;4793;81030;10623;340061;9447;84265;3606;9641;149628;440068;3569	K04734+K04519+K12966+K12964+K02580+K12971+K05410+K12646+K02581+K12965+K03023+K12654+K03024+K05482+K07211+K01370+K05405
Acute myeloid leukemia	22	94	0.0193342	0.153707	ko05221	Human Diseases	Cancers: Specific types	11040;23533;4790;6776;5594;10618;863;3845;5467;673;6654;6199;6932;51176;56951;79153;9649;83439;4609;10000;7704;10750	K08806+K02649+K02580+K11223+K04371+K04490+K10053+K07827+K04504+K04365+K03099+K04688+K02620+K04492+K04377+K04456+K10055+K04364
Graft-versus-host disease	14	53	0.0209253	0.162299	ko05332	Human Diseases	Immune diseases	3553;7124;3552;3122;3135;5551;3117;445347;3002;3113;3077;3115;3569;941	K04519+K03156+K04383+K06752+K06751+K07818+K10785+K01353+K05405+K05412
Toll and Imd signaling pathway	18	74	0.022358	0.166673	ko04624	Organismal Systems	Immune system	4792;5966;4790;3725;5606;330;3654;767558;329;348094;387521;51619;8772;51015;90378;401124;288;286	K04734+K09254+K02580+K04448+K04432+K16060+K04730+K10380+K10704+K06689+K02373+K04431
Hepatitis C	36	173	0.0225375	0.166673	ko05160	Human Diseases	Infectious diseases: Viral	3576;4792;23533;9021;4790;5594;1026;7124;148022;7132;3434;7187;29110;23586;3949;9451;3845;4939;673;6654;6041;9080;79153;8717;24146;9649;9641;975;3646;5516;10000;1956;10062;9076;23562;10750	K10030+K04734+K02649+K04696+K02580+K04371+K06625+K03156+K05842+K03158+K14217+K03174+K05410+K12646+K12473+K08860+K07827+K14216+K04365+K03099+K01165+K06087+K03171+K07211+K06508+K03250+K04382+K04456+K04361+K08536+K04364
Cell cycle	37	179	0.0231183	0.166702	ko04110	Cellular Processes	Cell growth and death	4616;359948;5000;51307;1026;1032;1027;5934;7531;472;1022;7027;4088;7533;4176;3065;996;6461;994;4171;9700;51434;10926;4999;153733;124222;1021;4609;7541;1031;4175;8555;4172;8697;9088;8317;7042	K04402+K04498+K02606+K05867+K06625+K06623+K06624+K16332+K06630+K04728+K02202+K04683+K04500+K16198+K02210+K06067+K03350+K06619+K05866+K02540+K02365+K03354+K06629+K02604+K06636+K06633+K02091+K04377+K10500+K06622+K02542+K06639+K02541+K03355+K02214+K13376
Endometrial cancer	20	85	0.0235899	0.166702	ko05213	Human Diseases	Cancers: Specific types	23533;5594;10618;3845;324;1495;2002;673;6654;6932;51176;56951;79153;9649;83439;4609;8313;10000;1956;10750	K02649+K04371+K04490+K07827+K02085+K05691+K04375+K04365+K03099+K02620+K04492+K04377+K04385+K04456+K04361+K04364
African trypanosomiasis	12	44	0.024542	0.16966	ko05143	Human Diseases	Infectious diseases: Parasitic	3553;3383;5330;7124;55784;2150;54106;3606;3593;94059;24142;3569	K04519+K06490+K05858+K03156+K02677+K04234+K10161+K05482+K05425+K19663+K00463+K05405
B cell receptor signaling pathway	24	108	0.0273619	0.18513	ko04662	Organismal Systems	Immune system	4792;23533;4794;4790;3725;5594;7409;4793;3845;6654;695;2213;25780;5532;79153;933;79092;9649;84433;4773;975;10000;1380;10750	K04734+K02649+K05872+K02580+K04448+K04371+K05730+K02581+K07827+K03099+K07370+K12560+K12362+K04348+K06467+K07367+K17332+K06508+K04456+K04012+K04364
Focal adhesion	77	419	0.0291306	0.19299	ko04510	Cellular Processes	Cellular community - eukaryotes	60;7791;23533;5829;2316;7094;3725;7422;1955;87;330;5594;3914;3987;7409;5062;55784;4660;3678;5499;329;2002;55544;153020;1399;3676;5501;673;1277;6654;6714;79892;55103;25959;9475;100130705;100170841;90780;79153;3672;3695;3918;2534;22798;10298;1284;2335;9649;23348;29780;3696;7057;55619;96626;94059;3911;7041;4233;3082;3915;1292;596;51299;10000;8292;3679;3675;3693;857;1956;8785;10216;84808;1690;3690;10…	K05692+K06273+K02649+K05760+K04437+K06271+K04448+K05448+K06243+K05699+K16060+K04371+K06244+K05730+K04410+K02677+K12329+K06484+K06269+K04375+K13708+K06277+K04438+K06483+K04365+K06236+K03099+K05704+K05700+K04349+K17388+K19719+K06237+K06279+K06480+K06590+K06246+K05703+K06245+K05734+K05717+K06275+K06591+K16857+K19663+K06240+K05099+K05460+K05635+K06238+K02161+K05726+K04456+K06583+K06482+K06588+K06278+…
MAPK signaling pathway	77	420	0.0305997	0.19671	ko04010	Environmental Information Processing	Signal transduction	3553;4791;4616;9750;2316;1844;4790;3725;5606;1848;3303;5594;3310;1326;5062;7124;4214;1649;7132;3554;1847;7048;5971;55784;3552;3164;7046;6197;6722;3845;6416;2002;153020;1399;4208;160622;673;3304;6654;4763;55103;5921;11221;25780;10016;994;5532;79153;5932;3306;50861;9649;773;783;51015;11184;94059;2256;2768;5567;4609;8911;9479;83694;90378;782;57608;85442;10000;53834;5536;2247;1956;9143;8605;7042;10750	K04519+K04469+K04402+K04460+K04437+K04459+K02580+K04448+K04432+K03283+K04371+K04415+K04410+K03156+K04416+K04452+K03158+K04386+K04388+K09253+K02677+K04383+K04465+K04674+K04373+K04378+K07827+K04430+K04375+K08018+K04438+K04454+K04365+K03099+K08052+K04349+K04352+K20216+K12362+K05866+K04348+K04407+K04381+K04344+K04863+K04408+K19663+K04358+K04346+K04345+K04377+K04856+K04434+K04431+K04862+K04456+K05095+…
Glycosaminoglycan biosynthesis - keratan sulfate	6	17	0.0311578	0.19671	ko00533	Metabolism	Glycan biosynthesis and metabolism	2683;6482;93010;9435;8702;2530	K07966+K00780+K09664+K04745+K07969+K00717
Adherens junction	30	143	0.0315477	0.19671	ko04520	Cellular Processes	Cellular community - eukaryotes	60;8826;359948;87;5594;10618;7048;10163;7046;343521;1495;4088;6714;79892;171024;6932;51176;56951;79153;1457;2534;10580;10174;83439;4233;5792;7082;1956;22998;5797	K05692+K16848+K04498+K05699+K04371+K04490+K04388+K05748+K04674+K06085+K05691+K04500+K05704+K05700+K06086+K02620+K04492+K03097+K05703+K05099+K05695+K05701+K04361+K06084+K05693
Hepatitis B	42	213	0.0338623	0.200573	ko05161	Human Diseases	Infectious diseases: Viral	3576;4792;23533;9586;359948;4790;3725;6776;5594;537;1026;7124;4214;148022;1027;55784;29110;317;23586;7046;3845;1388;64135;6416;2002;10542;6714;64764;79153;8772;4773;9641;94059;1643;1021;4609;3339;596;3569;10000;7042;10750	K10030+K04734+K02649+K09047+K04498+K02580+K04448+K11223+K04371+K03662+K06625+K03156+K04416+K05842+K06624+K02677+K05410+K02084+K12646+K04674+K07827+K09049+K12647+K04430+K04375+K16344+K05704+K09048+K02373+K17332+K07211+K19663+K10140+K02091+K04377+K06255+K02161+K05405+K04456+K13376+K04364
SNARE interactions in vesicular transport	10	36	0.0340182	0.200573	ko04130	Genetic Information Processing	Folding, sorting and degradation	8675;6810;8773;8677;9341;9554;51272;10791;112755;55850	K08489+K13502+K08508+K08498+K13505+K08517+K08504+K08514+K08486+K08507
Viral carcinogenesis	63	338	0.0347442	0.200573	ko05203	Human Diseases	Cancers: Overview	4792;4791;23533;5966;9586;5829;7185;359948;4790;3725;6776;87;3718;5594;23352;3987;1026;51317;1027;7187;3431;51564;2314;5934;6722;3845;7531;1388;4055;79903;1232;5366;718;7533;3065;6714;3135;64764;3017;8841;79153;578;8717;8364;6641;9258;96626;730394;1021;8365;7041;5567;376132;3077;8339;9093;8343;8370;554313;8362;8350;8348;10750	K04734+K04469+K02649+K09254+K09047+K05760+K03172+K04498+K02580+K04448+K11223+K05699+K11218+K04371+K10691+K06625+K11643+K06624+K03174+K15413+K11408+K05768+K16332+K04378+K07827+K06630+K09049+K03159+K14021+K04178+K10131+K03990+K16198+K06067+K05704+K06751+K09048+K11252+K11404+K03171+K11254+K12076+K16175+K03142+K02091+K04345+K09504+K04364
RIG-I-like receptor signaling pathway	19	83	0.0349434	0.200573	ko04622	Organismal Systems	Immune system	3576;4792;7706;4790;10010;7124;4214;7187;29110;23586;4793;64135;9755;340061;79671;8717;8772;9641;3593	K10030+K04734+K10652+K02580+K12650+K03156+K04416+K03174+K05410+K12646+K02581+K12647+K12652+K12654+K12653+K03171+K02373+K07211+K05425
Glycerophospholipid metabolism	28	133	0.0353211	0.200573	ko00564	Metabolism	Lipid metabolism	79888;79143;8760;9663;23761;10162;10423;84803;11313;10555;5806;8613;254531;56994;5833;8443;3931;84173;55326;56894;57678;150763;23171;8605;8611;43;139189;1040	K13510+K13516+K00981+K15728+K01613+K13515+K00999+K13506+K06130+K13509+K01115+K01080+K13512+K00994+K00967+K00649+K00650+K00629+K19007+K13523+K00006+K16342+K01049+K00901
Alcoholism	49	256	0.0380287	0.21216	ko05034	Human Diseases	Substance dependence	135;54331;9586;10645;5594;2790;51564;805;5499;3845;1388;5501;673;6654;3065;25959;8520;64764;3017;8841;90780;79153;8364;9649;8365;3077;8339;552891;8357;8343;2905;8370;554313;8362;474382;8330;6531;3012;2775;317772;653604;5569;83740;5173;8350;3013;8969;8348;10750	K04266+K07826+K09047+K07359+K04371+K04545+K11408+K02183+K06269+K07827+K09049+K04365+K03099+K06067+K11303+K09048+K11252+K11404+K06279+K11254+K11253+K05211+K11251+K05036+K04534+K15985+K15840+K04364
Thyroid cancer	13	52	0.0389286	0.213436	ko05216	Human Diseases	Cancers: Specific types	10318;5594;10618;3845;673;6257;6932;51176;56951;79153;83439;4609;8030	K09291+K04371+K04490+K07827+K04365+K08525+K02620+K04492+K04377+K09288
EGFR tyrosine kinase inhibitor resistance	30	146	0.0404876	0.218221	ko01521	Human Diseases	Drug resistance: Antineoplastic	23533;7422;5594;3570;55784;317649;3717;3845;10018;7039;673;6654;2549;4763;6714;6199;90780;79153;5335;9649;94059;4233;3082;596;3569;10000;53834;2247;1956;10750	K02649+K05448+K04371+K05055+K02677+K03259+K04447+K07827+K16341+K08774+K04365+K03099+K09593+K08052+K05704+K04688+K06279+K01116+K19663+K05099+K05460+K02161+K05405+K04456+K05094+K18497+K04361+K04364
Pertussis	28	135	0.0418935	0.222036	ko05133	Human Diseases	Infectious diseases: Bacterial	3576;3553;4790;3725;114548;5594;3684;3654;7124;148022;51279;3678;3552;805;171389;91662;718;1073;51561;79153;100293534;10392;3593;440068;3569;6374;4843;151827	K10030+K04519+K02580+K04448+K12800+K04371+K06461+K04730+K03156+K05842+K01330+K06484+K04383+K02183+K03990+K05765+K05426+K03989+K08727+K05425+K01370+K05405+K05506+K13241
Prostate cancer	27	130	0.0444003	0.231464	ko05215	Human Diseases	Cancers: Specific types	4792;23533;9586;359948;4790;5594;1026;10618;1027;3845;7039;2308;673;6654;64764;6932;4824;51176;56951;79153;9649;83439;596;10000;1956;367;10750	K04734+K02649+K09047+K04498+K02580+K04371+K06625+K04490+K06624+K07827+K08774+K07201+K04365+K03099+K09048+K02620+K09348+K04492+K02161+K04456+K04361+K08557+K04364
Salmonella infection	30	149	0.051196	0.262586	ko05132	Human Diseases	Infectious diseases: Bacterial	3576;3553;60;6349;6348;414062;6351;9560;388372;3460;2316;2920;4790;3725;5594;23207;10095;10092;10163;3552;7100;9475;2921;79153;81873;3606;440068;3569;7082;4843	K10030+K04519+K05692+K05408+K12964+K05133+K04437+K05505+K02580+K04448+K04371+K15348+K05757+K05754+K05748+K04383+K10168+K17388+K05482+K01370+K05405+K05701+K13241
Dorso-ventral axis formation	16	71	0.0566497	0.285946	ko04320	Organismal Systems	Development	2114;5594;132864;3845;143689;673;6654;51513;79153;4855;9649;440822;57493;1956;4854;10750	K02678+K04371+K02602+K07827+K02156+K04365+K03099+K03211+K02599+K04361+K04364
Axon guidance	53	289	0.0628624	0.308601	ko04360	Organismal Systems	Development	7852;23533;10045;5594;5062;55784;64218;10509;64101;10501;3845;84628;54961;3984;1073;2050;6714;5998;9475;5921;27289;51466;6461;2051;8482;5532;79153;4690;100130733;2534;5335;10298;4773;219699;57611;6405;57633;57522;1942;57556;815;4233;5727;2039;100288801;817;1969;10500;23365;8829;54674;448831;6091	K04189+K02649+K07527+K04371+K04410+K02677+K06521+K16351+K06842+K07827+K16359+K05766+K05743+K05765+K05113+K05704+K07524+K17388+K04352+K07531+K05746+K19862+K06619+K05114+K06529+K04348+K07365+K06850+K05703+K01116+K05734+K17332+K07521+K06838+K06840+K07523+K06839+K07526+K05462+K04515+K05099+K06225+K07520+K07528+K05103+K07532+K06724+K06753
Cholinergic synapse	29	146	0.0630789	0.308601	ko04725	Organismal Systems	Nervous system	23533;54331;9586;5594;3759;5330;2790;55784;3717;3845;113;64764;115;79153;2534;773;3710;94059;5567;815;596;3768;10000;552891;2767;817;2775;89832;43	K02649+K07826+K09047+K04371+K04996+K05858+K04545+K02677+K04447+K07827+K08047+K09048+K08049+K05703+K04344+K04960+K19663+K04345+K04515+K02161+K05005+K04456+K04635+K04534+K04809+K01049
Glycosphingolipid biosynthesis - ganglio series	6	20	0.0659559	0.313045	ko00604	Metabolism	Glycan biosynthesis and metabolism	6482;2720;3073;643853;30815;27090	K00780+K12309+K12373+K03376+K03374
Sulfur relay system	6	20	0.0659559	0.313045	ko04122	Genetic Information Processing	Folding, sorting and degradation	23510;7263;6855;9054;79734;51562	K01011+K14168+K04487+K03635
Other glycan degradation	7	25	0.0679848	0.315245	ko00511	Metabolism	Glycan biosynthesis and metabolism	2629;2720;284004;3073;643853;175;129807	K01201+K12309+K14459+K12373+K01444+K12357
Longevity regulating pathway - multiple species	18	84	0.0689246	0.315245	ko04213	Organismal Systems	Aging	6648;23533;3303;3310;847;340527;3845;113;2308;5562;3304;3065;5571;6199;115;3306;5567;10000	K04564+K02649+K03283+K03781+K07187+K07827+K08047+K07201+K07198+K06067+K07200+K04688+K08049+K04345+K04456
Antigen processing and presentation	32	165	0.0696173	0.315245	ko04612	Organismal Systems	Immune system	3303;3310;7124;79415;55729;3122;9852;4800;5993;63901;3304;1810;3135;3802;254013;3809;3804;925;3805;3117;3306;926;100132285;3803;445347;3113;3077;3115;64864;3812;115653;3811	K03283+K03156+K01368+K06752+K08064+K08061+K08065+K06751+K07981+K07980+K07982+K06458+K06459+K10785
Tryptophan metabolism	14	62	0.0703849	0.315245	ko00380	Metabolism	Amino acid metabolism	64333;201176;39;847;8942;26;3030;15;1545;79746;24142;883;501;259307	K01556+K00626+K03781+K11182+K07515+K00669+K07410+K07511+K00463+K00816+K14085+K03334
Fc gamma R-mediated phagocytosis	29	148	0.0727717	0.32051	ko04666	Organismal Systems	Immune system	653361;4082;23533;5594;7409;8877;55784;10095;10092;10163;2314;2210;382;2209;1399;3984;1073;2213;6199;5806;8613;79153;81873;5335;274;94059;10000;273;8611	K08011+K12561+K02649+K04371+K05730+K04718+K02677+K05757+K05754+K05748+K05768+K06498+K07941+K04438+K05743+K05765+K12560+K04688+K01115+K01080+K01116+K12562+K19663+K04456
PI3K-Akt signaling pathway	91	527	0.0735762	0.32051	ko04151	Environmental Information Processing	Signal transduction	23533;5008;6446;54331;9586;4790;7422;10875;1955;3718;5594;3914;1026;2790;3570;1027;55784;317649;3678;5934;5525;3164;1435;3717;3845;7531;1388;10018;160622;3676;1277;5562;7533;3575;1440;79811;6654;6199;2057;1436;64764;100130705;100170841;3560;79153;3672;9180;3695;3918;22798;672;1284;2335;9649;3563;3696;7057;4846;3911;5516;1021;2256;1942;4609;7010;4233;3082;3915;1292;596;3569;10000;552891;53834;1969…	K02649+K05418+K13302+K07826+K09047+K02580+K05448+K05466+K06243+K11218+K04371+K06244+K06625+K04545+K05055+K06624+K02677+K03259+K06484+K16332+K11584+K04465+K05453+K04447+K07827+K06630+K09049+K16341+K06483+K06236+K07198+K16198+K05072+K05423+K05090+K03099+K04688+K05079+K09048+K19719+K06237+K05069+K06480+K05057+K06590+K06246+K06245+K10605+K05717+K04737+K06591+K16857+K13242+K06240+K04382+K02091+K04358+…
beta-Alanine metabolism	10	41	0.0753098	0.323629	ko00410	Metabolism	Metabolism of other amino acids	51733;1806;314;18;23042;3030;218;79746;501;34	K01431+K00207+K00276+K13524+K01580+K18966+K07515+K00129+K07511+K14085+K00249
Peroxisome	23	114	0.0782531	0.331793	ko04146	Cellular Processes	Transport and catabolism	6648;9921;847;51703;51;84263;11264;55711;5190;5830;23600;8443;3417;8799;4598;5052;8292;225;4843;84320;2053;55289;11001	K04564+K13346+K03781+K01897+K00232+K08764+K13350+K13356+K13339+K13342+K01796+K00649+K00031+K13352+K00869+K13279+K12261+K05676+K13241+K13239+K08726+K08746
Epstein-Barr virus infection	52	288	0.0809005	0.336086	ko05169	Human Diseases	Infectious diseases: Viral	7128;4792;3383;4791;23533;3587;4794;7185;359948;4790;3725;283149;5606;3303;3718;3310;1026;3654;1027;7187;5971;29110;23586;4793;9451;7531;6416;7533;3304;7514;5719;3065;5432;3135;10623;1457;8717;84265;5335;3306;80209;51015;4734;5567;4609;90378;3077;596;10000;958;9143;1380	K11859+K04734+K06490+K04469+K02649+K05134+K05872+K03172+K04498+K02580+K04448+K03006+K04432+K03283+K11218+K06625+K04730+K06624+K03174+K09253+K05410+K12646+K02581+K08860+K06630+K04430+K16198+K14290+K03039+K06067+K03011+K06751+K03023+K03097+K03171+K03024+K01116+K10591+K04345+K04377+K04431+K02161+K04456+K03160+K04403+K04012
Asthma	11	47	0.0821949	0.336086	ko05310	Human Diseases	Immune diseases	7124;5553;3122;64231;3117;445347;10394;3113;3115;959;958	K03156+K10786+K06752+K08090+K10785+K03161+K03160
GnRH signaling pathway	29	150	0.0834501	0.336086	ko04912	Organismal Systems	Endocrine system	3725;5606;5594;5330;4214;55784;805;3845;113;6416;2002;6654;6714;5806;115;79153;9649;3710;1839;51015;5567;815;90378;4323;2767;817;1956;8605;10750	K04448+K04432+K04371+K05858+K04416+K02677+K02183+K07827+K08047+K04430+K04375+K03099+K05704+K01115+K08049+K04960+K08523+K04345+K04515+K04431+K07763+K04635+K04361+K16342+K04364
Other types of O-glycan biosynthesis	10	42	0.0862113	0.336086	ko00514	Metabolism	Glycan biosynthesis and metabolism	2683;8473;79709;3955;6388;6480;143888;79573;84899;54059	K07966+K09667+K11703+K05948+K00728+K00778+K13667+K03691
Endocytosis	77	444	0.0864606	0.336086	ko04144	Cellular Processes	Transport and catabolism	10938;3579;7852;3577;3482;7456;128866;116988;3303;3310;80223;11031;64411;7048;10095;10092;867;5869;79729;3949;7046;9744;382;89853;55737;51652;84034;4088;6642;10015;119016;30844;2352;79811;3304;6714;3135;5662;1436;112936;151195;10617;5806;10254;3560;10564;81873;6641;3306;51028;274;11059;6345;154;79643;93343;26119;642517;4734;55803;4233;8218;3077;388335;145553;53834;273;285782;133015;284403;1601;30…	K12483+K05050+K04189+K04175+K06564+K19475+K12194+K12491+K03283+K12484+K07891+K12490+K04388+K05757+K05754+K04707+K07888+K12470+K12473+K04674+K12489+K07941+K12186+K18468+K12193+K12478+K04500+K17917+K12200+K12477+K13649+K05090+K05704+K06751+K12494+K18466+K11866+K01115+K04705+K05069+K18442+K12196+K12190+K12562+K05633+K12469+K04142+K12195+K12474+K10591+K12486+K05099+K04646+K18443+K05095+K05094+K15053+…
Aldosterone synthesis and secretion	25	127	0.0866597	0.336086	ko04925	Organismal Systems	Endocrine system	9586;5330;55784;5138;3949;3164;805;4929;113;1388;57172;160622;64764;115;3710;94059;747;5567;8911;815;2767;817;3991;8536;51305	K09047+K05858+K02677+K18283+K12473+K04465+K02183+K08558+K08047+K09049+K08794+K09048+K08049+K04960+K19663+K13806+K04345+K04856+K04515+K04635+K07188+K04919
Allograft rejection	14	64	0.087408	0.336086	ko05330	Human Diseases	Immune diseases	7124;3122;3135;5551;3117;3593;445347;3002;3113;3077;3115;959;958;941	K03156+K06752+K06751+K07818+K05425+K10785+K01353+K03161+K03160+K05412
Regulation of actin cytoskeleton	66	376	0.0877207	0.336086	ko04810	Cellular Processes	Cell motility	60;23533;5829;117289;8826;87;5594;3987;3684;7409;5062;10095;4660;10092;10163;2314;3678;5499;3845;9459;324;5305;55544;1399;54961;3676;3984;5501;673;1073;6654;6714;79892;25959;9475;51466;79153;9087;3672;3695;8396;81873;54855;10298;2335;9649;23348;55691;3696;55619;96626;2256;2768;7041;79038;7074;51299;53834;115572;3679;3675;23365;2247;3693;1956;3690	K05692+K02649+K05760+K08007+K16848+K05699+K04371+K06461+K05730+K04410+K05757+K12329+K05754+K05748+K05768+K06484+K06269+K07827+K05729+K02085+K00920+K13708+K04438+K05766+K06483+K05743+K04365+K05765+K03099+K05704+K05700+K17388+K05746+K05764+K06480+K06590+K05742+K05734+K05717+K05763+K05762+K06591+K04358+K04346+K00921+K05731+K05726+K05095+K05094+K06583+K06482+K07532+K18497+K06588+K04361+K06493
Lysine degradation	22	111	0.0972014	0.367976	ko00310	Metabolism	Amino acid metabolism	84444;39;23067;27166;767558;54904;55063;79709;2146;10962;9869;83852;3030;5351;85007;10157;79746;54093;84295;501;64745;5352	K11427+K00626+K11422+K15588+K11420+K11425+K11424+K11703+K11430+K11421+K18494+K07515+K00473+K18202+K14157+K07511+K19199+K14085+K11423+K13645
VEGF signaling pathway	20	100	0.102298	0.382715	ko04370	Environmental Information Processing	Signal transduction	23533;5829;7422;5594;3987;8877;55784;3845;6714;5532;79153;5335;96626;4773;4846;94059;7041;9047;10000;8605	K02649+K05760+K05448+K04371+K04718+K02677+K07827+K05704+K04348+K01116+K17332+K13242+K19663+K08273+K04456+K16342
Colorectal cancer	21	106	0.103606	0.383102	ko05210	Human Diseases	Cancers: Specific types	5900;23533;3725;5594;10618;7048;7046;3845;324;4088;673;6932;51176;56951;79153;83439;4609;8313;596;10000;7042	K08732+K02649+K04448+K04371+K04490+K04388+K04674+K07827+K02085+K04500+K04365+K02620+K04492+K04377+K04385+K02161+K04456+K13376
Small cell lung cancer	25	130	0.106846	0.389779	ko05222	Human Diseases	Cancers: Specific types	4792;23533;7185;4790;1955;330;3914;7187;317;329;9618;6257;100170841;3918;22798;1284;2335;3911;1021;4609;3915;596;10000;3675;4843	K04734+K02649+K03172+K02580+K06243+K16060+K06244+K03174+K02084+K09848+K08525+K06237+K06246+K06245+K05717+K06240+K02091+K04377+K05635+K02161+K04456+K06482+K13241
Inflammatory mediator regulation of TRP channels	29	154	0.107863	0.389779	ko04750	Organismal Systems	Sensory system	3553;23533;5606;5330;3554;55784;805;5499;2150;113;5501;5029;6714;25959;5583;5732;115;51393;5335;3710;51015;94059;3269;5567;815;1549;817;3356;8605	K04519+K02649+K04432+K05858+K04386+K02677+K02183+K06269+K04234+K08047+K04269+K05704+K18051+K04259+K08049+K04971+K01116+K04960+K19663+K04149+K04345+K04515+K07418+K04157+K16342
Chronic myeloid leukemia	24	125	0.11379	0.403849	ko05220	Human Diseases	Cancers: Specific types	4792;23533;4790;6776;5594;1026;1027;7048;867;7046;3845;1399;673;6654;3065;6461;90780;79153;9649;1021;4609;10000;7042;10750	K04734+K02649+K02580+K11223+K04371+K06625+K06624+K04388+K04707+K04674+K07827+K04438+K04365+K03099+K06067+K06619+K06279+K02091+K04377+K04456+K13376+K04364
Estrogen signaling pathway	31	167	0.114297	0.403849	ko04915	Organismal Systems	Endocrine system	23533;9586;3725;3303;5594;3310;6667;5330;805;3845;113;1388;3304;6654;6714;64764;2550;115;90780;79153;3306;9649;3710;1839;4846;5567;283237;10000;2775;1956;10750	K02649+K09047+K04448+K03283+K04371+K04684+K05858+K02183+K07827+K08047+K09049+K03099+K05704+K09048+K04615+K08049+K06279+K04960+K08523+K13242+K04345+K09571+K04456+K04534+K04361+K04364
Fc epsilon RI signaling pathway	22	114	0.12073	0.42189	ko04664	Organismal Systems	Immune system	3937;23533;5606;240;5594;7409;7124;55784;3845;6416;64231;6654;695;79153;2534;5335;9649;51015;90378;10000;8605;10750	K07361+K02649+K04432+K00461+K04371+K05730+K03156+K02677+K07827+K04430+K08090+K03099+K07370+K05703+K01116+K04431+K04456+K16342+K04364
Bladder cancer	13	62	0.125477	0.433716	ko05219	Human Diseases	Cancers: Specific types	3576;7422;5594;1026;3845;673;6714;79153;7057;1839;4609;53834;1956	K10030+K05448+K04371+K06625+K07827+K04365+K05704+K16857+K08523+K04377+K05094+K04361
Polyketide sugar unit biosynthesis	1	1	0.149305	0.501256	ko00523	Metabolism	Metabolism of terpenoids and polyketides	23483	K01710
Steroid biosynthesis	7	30	0.149746	0.501256	ko00100	Metabolism	Lipid metabolism	9852;4047;2222;6713;1591;3988;10826	K13373+K01852+K00801+K00511+K07436+K01052+K07750
Glycosaminoglycan biosynthesis - chondroitin sulfate / dermatan sulfate	7	30	0.149746	0.501256	ko00532	Metabolism	Glycan biosynthesis and metabolism	22856;55454;56548;54480;166012;84817;64132	K13499+K00746+K04743+K03419+K07779+K00771
Primary immunodeficiency	15	76	0.154415	0.504503	ko05340	Human Diseases	Immune diseases	5993;3575;916;695;3932;925;7535;915;926;64864;29851;959;100;958;7374	K08061+K05072+K06451+K07370+K05856+K06458+K07360+K06450+K06459+K06713+K03161+K01488+K03160+K03648
Amoebiasis	34	191	0.154655	0.504503	ko05146	Human Diseases	Infectious diseases: Parasitic	3576;3553;5272;23533;4790;1955;87;3914;3684;5330;7124;3554;55784;5869;2769;1277;79892;100170841;383;3918;22798;1284;2335;170463;3593;94059;3911;5567;3915;3569;2767;8292;4843;7042	K10030+K04519+K13963+K02649+K02580+K06243+K05699+K06244+K06461+K05858+K03156+K04386+K02677+K07888+K04637+K06236+K05700+K19720+K06237+K01476+K06246+K06245+K05717+K05425+K19663+K06240+K04345+K05635+K05405+K04635+K13241+K13376
Shigellosis	25	136	0.155476	0.504503	ko05131	Human Diseases	Infectious diseases: Bacterial	3576;4792;60;4790;5594;8767;10095;10092;10163;3678;4793;55544;1399;9725;6714;55362;79892;9475;6461;79153;81873;23348;55619;10392;151827	K10030+K04734+K05692+K02580+K04371+K08846+K05757+K05754+K05748+K06484+K02581+K13708+K04438+K10165+K05704+K05700+K17388+K06619+K08727
Pancreatic cancer	19	100	0.157341	0.505399	ko05212	Human Diseases	Cancers: Specific types	5900;23533;4790;7422;5594;100130357;7048;10928;7046;3845;9459;7039;4088;673;79153;1021;10000;1956;7042	K08732+K02649+K02580+K05448+K04371+K04482+K04388+K08773+K04674+K07827+K05729+K08774+K04500+K04365+K02091+K04456+K04361+K13376
Fatty acid metabolism	13	65	0.163892	0.521177	ko01212	Metabolism	Global and overview maps	39;51703;51;1375;83693;3030;51102;79746;6319;34;79071;9374;55289	K00626+K01897+K00232+K19523+K10251+K07515+K07512+K07511+K00507+K00249+K10203+K01074
Herpes simplex infection	51	300	0.174979	0.541581	ko05168	Human Diseases	Infectious diseases: Viral	4792;3553;3460;7185;9021;359948;4790;3725;283149;8740;7124;148022;7132;3434;7187;3431;29110;8764;23586;6428;4793;3122;5499;9451;3717;64135;4939;718;5501;6041;3135;25959;54106;116138;1457;84163;112950;3117;80209;8772;9641;3593;3113;3077;3115;3569;4049;708;6347;9143;79064	K04734+K04519+K05133+K03172+K04696+K04498+K02580+K04448+K03006+K05477+K03156+K05842+K03158+K14217+K03174+K15413+K05410+K05152+K12646+K12892+K02581+K06752+K06269+K08860+K04447+K12647+K14216+K03990+K01165+K06751+K10161+K14966+K03097+K03121+K15129+K02373+K07211+K05425+K05405+K05468+K15414+K14624+K04403+K03131+K14284
Bacterial invasion of epithelial cells	29	163	0.177908	0.541581	ko05100	Human Diseases	Infectious diseases: Bacterial	60;23533;5829;3987;10095;10092;10163;867;3678;79729;1495;55544;1399;2549;6714;79892;90780;81873;2335;23348;55619;96626;1731;7041;4233;8218;51299;857;79658	K05692+K02649+K05760+K05757+K05754+K05748+K04707+K06484+K13738+K05691+K13708+K04438+K09593+K05704+K05700+K06279+K05717+K13737+K05099+K04646+K05726+K06278+K13736
PPAR signaling pathway	21	114	0.178076	0.541581	ko03320	Organismal Systems	Endocrine system	51703;51;5467;84263;1593;1375;6257;4973;123;171024;336;2173;10580;10174;6319;1581;2172;34;10062;55289;11001	K01897+K00232+K04504+K08764+K00488+K19523+K08525+K08763+K17284+K06086+K08758+K08756+K00507+K00489+K08755+K00249+K08536+K08746
Insulin signaling pathway	42	244	0.178777	0.541581	ko04910	Organismal Systems	Endocrine system	23533;2319;9021;79660;5836;5594;5573;9322;867;317649;340527;805;5499;3101;3845;6720;5509;2002;153020;1399;2308;5501;673;5562;6654;5571;25959;6199;56946;171024;8651;90780;79153;9649;114932;10580;10174;5567;5792;10000;3991;10750	K02649+K07192+K04696+K07189+K00688+K04371+K04739+K07196+K04707+K03259+K07187+K02183+K06269+K00844+K07827+K07197+K04375+K06277+K04438+K07201+K04365+K07198+K03099+K07200+K04688+K06086+K04694+K06279+K07190+K04345+K05695+K04456+K07188+K04364
Insulin secretion	20	108	0.178824	0.541581	ko04911	Organismal Systems	Endocrine system	9586;5330;55784;113;1388;6513;5864;64764;115;3780;2864;3710;94059;5567;815;27094;85442;2767;817;3783	K09047+K05858+K02677+K08047+K09049+K07299+K07882+K09048+K08049+K04942+K04325+K04960+K19663+K04345+K04515+K04939+K04351+K04635+K04945
Collecting duct acid secretion	7	32	0.191388	0.573086	ko04966	Organismal Systems	Excretory system	528;9296;760;10723;155066;496;245973	K02148+K02151+K18245+K13627+K02153+K01543
Jak-STAT signaling pathway	35	202	0.192831	0.573086	ko04630	Environmental Information Processing	Signal transduction	23533;5008;3460;3587;9021;359948;6776;3718;1026;3570;3717;3575;1440;6654;2057;10254;51561;3560;3976;1154;8651;9180;9649;3563;64109;3593;10148;4609;596;3569;2273;10000;3574;3568;10750	K02649+K05418+K05133+K05134+K04696+K04498+K11223+K11218+K06625+K05055+K04447+K05072+K05423+K03099+K05079+K04705+K05426+K05069+K05419+K04701+K04694+K05057+K04737+K05078+K05425+K05059+K04377+K02161+K05405+K14365+K04456+K05431+K05067+K04364
Adipocytokine signaling pathway	18	98	0.204257	0.601422	ko04920	Organismal Systems	Endocrine system	4792;4794;9021;4790;10645;7124;7132;51703;340527;4793;3717;1375;6257;5562;6513;5571;8717;10000	K04734+K05872+K04696+K02580+K07359+K03156+K03158+K01897+K07187+K02581+K04447+K19523+K08525+K07198+K07299+K07200+K03171+K04456
Lysosome	38	223	0.211067	0.612969	ko04142	Cellular Processes	Transport and catabolism	3482;10043;537;26088;4891;9741;79415;2760;968;55729;130340;9852;1522;63901;8906;2629;6272;6448;25870;254013;4864;2720;3073;1513;643853;1521;285362;175;3988;10053;8218;8120;1519;8722;9374;55353;84976;374308	K06564+K12404+K03662+K12347+K12387+K01368+K12383+K06501+K12395+K08568+K12391+K01201+K12388+K01565+K13444+K12385+K12309+K12373+K01371+K08569+K01444+K01052+K12393+K04646+K12397+K01374+K01373+K01074
Fatty acid elongation	7	33	0.213774	0.612969	ko00062	Metabolism	Lipid metabolism	64834;83693;3030;51102;79746;79071;9374	K10247+K10251+K07515+K07512+K07511+K10203+K01074
Non-small cell lung cancer	16	87	0.220022	0.612969	ko05223	Human Diseases	Cancers: Specific types	23533;5594;55784;3845;7039;673;6257;6654;79153;5335;9649;94059;1021;10000;1956;10750	K02649+K04371+K02677+K07827+K08774+K04365+K08525+K03099+K01116+K19663+K02091+K04456+K04361+K04364
Propanoate metabolism	9	45	0.221189	0.612969	ko00640	Metabolism	Carbohydrate metabolism	39;18;3030;55902;3945;79746;5096;34;23255	K00626+K13524+K07515+K01895+K00016+K07511+K01966+K00249
Ras signaling pathway	62	377	0.221404	0.612969	ko04014	Environmental Information Processing	Signal transduction	5900;23533;5966;54331;4790;7422;10875;2114;5594;2790;5062;10928;55784;29110;5869;805;1435;382;3845;2002;153020;79811;6654;2549;4763;55103;1436;5921;25780;5806;6461;23507;90780;79153;7535;84230;5335;10298;9649;54453;84859;94059;445347;2256;1942;5567;55770;7010;376132;4233;3082;7074;85442;10000;552891;53834;1969;2247;1956;8605;100271927;10750	K08732+K02649+K09254+K07826+K02580+K05448+K05466+K02678+K04371+K04545+K04410+K08773+K02677+K05410+K07888+K02183+K05453+K07941+K07827+K04375+K17636+K05090+K03099+K09593+K08052+K04349+K04352+K12362+K01115+K06619+K19613+K06279+K07360+K01116+K05734+K17638+K19663+K10785+K04358+K05462+K04345+K17637+K05121+K05099+K05460+K05731+K08019+K04456+K05095+K05094+K05103+K18497+K04361+K16342+K17630+K04364
Choline metabolism in cancer	26	149	0.222891	0.612969	ko05231	Human Diseases	Cancers: Overview	5900;23533;3091;3725;57153;5594;6667;55784;10163;3845;6654;6199;5806;8613;79153;56994;5335;9649;94059;10000;1956;8605;8611;6581;139189;10750	K08732+K02649+K08268+K04448+K15377+K04371+K04684+K02677+K05748+K07827+K03099+K04688+K01115+K01080+K00994+K01116+K19663+K04456+K04361+K16342+K08200+K00901+K04364
Primary bile acid biosynthesis	5	22	0.223147	0.612969	ko00120	Metabolism	Lipid metabolism	84263;1593;23600;1581;9023	K08764+K00488+K01796+K00489+K10223
Long-term potentiation	21	118	0.223599	0.612969	ko04720	Organismal Systems	Nervous system	359948;5594;5330;55784;805;6197;5499;3845;5501;673;25959;5532;79153;3710;94059;5567;10411;815;83694;817;2905	K04498+K04371+K05858+K02677+K02183+K04373+K06269+K07827+K04365+K04348+K04960+K19663+K04345+K08014+K04515+K05211
Neurotrophin signaling pathway	45	270	0.232857	0.629582	ko04722	Organismal Systems	Nervous system	4792;11213;3656;23533;4794;4790;3725;651746;5594;5663;3654;4214;8767;4793;805;6197;3845;7531;57498;153020;1399;6272;673;6654;2549;6461;90780;79153;5335;9649;10916;4145;815;83694;90378;56160;596;64110;10000;57692;817;4916;10817;28986;10750	K04734+K04732+K04731+K02649+K05872+K02580+K04448+K12460+K04371+K04505+K04730+K04416+K08846+K02581+K02183+K04373+K07827+K06630+K06277+K04438+K12388+K04365+K03099+K09593+K06619+K06279+K01116+K12464+K08888+K04515+K04431+K02161+K04456+K05101+K12461+K04364
ECM-receptor interaction	33	194	0.233618	0.629582	ko04512	Environmental Information Processing	Signaling molecules and interaction	1955;3914;3678;3676;1277;100130705;100170841;3672;3695;3918;22798;1284;2335;3696;7057;3911;6385;3915;3339;1292;2812;8292;3679;3675;3693;8785;6382;10216;84808;1690;11167;3690;84168	K06243+K06244+K06484+K06483+K06236+K19719+K06237+K06480+K06590+K06246+K06245+K05717+K06591+K16857+K06240+K16338+K05635+K06255+K06238+K06262+K06583+K06482+K06588+K06257+K06251+K06254+K06493
IL-17 signaling pathway	30	176	0.242731	0.648642	ko04657	Organismal Systems	Immune system	3576;7128;4792;3553;2920;23765;4790;3725;5597;5594;7124;7187;29110;9618;1440;6364;2921;400935;79153;8717;27189;8772;9641;127670;4586;8690;3569;727897;6374;6347	K10030+K11859+K04734+K04519+K05505+K05164+K02580+K04448+K06855+K04371+K03156+K03174+K05410+K09848+K05423+K14625+K05168+K03171+K05491+K02373+K07211+K07994+K13908+K05405+K05506+K14624
Apoptosis - fly	16	89	0.248614	0.658827	ko04214	Cellular Processes	Cell growth and death	3725;5594;317;9451;3845;84823;9618;472;10059;673;27245;11221;79153;90378;1956;23089	K04448+K04371+K02084+K08860+K07827+K07611+K09848+K04728+K17065+K04365+K06030+K20216+K04431+K04361+K10798
Pantothenate and CoA biosynthesis	5	23	0.252704	0.664131	ko00770	Metabolism	Metabolism of cofactors and vitamins	8875;51733;1806;23042;80347	K08069+K01431+K00207+K18966+K02318
Circadian rhythm	7	35	0.261102	0.675044	ko04710	Organismal Systems	Environmental adaptation	9572;1407;5562;1454;5571;6095;6097	K03728+K02295+K07198+K08960+K07200+K08532+K08534
Glycosylphosphatidylinositol (GPI)-anchor biosynthesis	7	35	0.261102	0.675044	ko00563	Metabolism	Glycan biosynthesis and metabolism	5277;94005;84747;10615;55650;84992;128869	K03857+K05291+K07542+K11001+K05293
Phospholipase D signaling pathway	37	223	0.267886	0.682267	ko04072	Environmental Information Processing	Signal transduction	3576;3579;5900;3577;23533;5594;5330;8877;55784;382;3845;113;64231;6654;2549;10555;5806;8613;115;90780;79153;2534;5335;9649;55326;56894;2768;10411;85442;10000;100133301;1956;8605;8611;57121;139189;10750	K10030+K05050+K08732+K04175+K02649+K04371+K05858+K04718+K02677+K07941+K07827+K08047+K08090+K03099+K09593+K13509+K01115+K01080+K08049+K06279+K05703+K01116+K19007+K13523+K04346+K08014+K04351+K04456+K04605+K04361+K16342+K08390+K00901+K04364
Central carbon metabolism in cancer	18	103	0.271289	0.682267	ko05230	Human Diseases	Cancers: Overview	23533;3091;8140;5594;9123;5223;3101;3845;6510;6513;5160;79153;4609;4233;10000;53834;4916;1956	K02649+K08268+K13780+K04371+K08180+K01834+K00844+K07827+K05616+K07299+K00161+K04377+K05099+K04456+K05094+K05101+K04361
Influenza A	65	404	0.274272	0.682267	ko05164	Human Diseases	Infectious diseases: Viral	3576;4792;3553;3383;60;10625;23533;8794;7706;3460;9021;359948;4790;3725;5606;114548;3303;5045;5594;3310;4928;8743;7124;148022;7132;7763;55784;29110;23586;3552;4793;3122;9451;3717;171389;91662;64135;6416;4939;3304;7514;6041;79671;8793;84000;79153;3117;3306;149466;3606;81543;9641;51015;3268;3593;440068;3113;90378;3115;388335;5343;3569;10000;6347;79064	K10030+K04734+K04519+K06490+K05692+K15046+K02649+K04722+K10652+K05133+K04696+K04498+K02580+K04448+K04432+K12800+K03283+K01349+K04371+K14297+K04721+K03156+K05842+K03158+K14404+K02677+K05410+K12646+K04383+K02581+K06752+K08860+K04447+K12647+K04430+K14216+K14290+K01165+K12653+K09643+K05482+K07211+K15044+K05425+K01370+K04431+K01315+K05405+K04456+K14624+K14284
Monobactam biosynthesis	1	2	0.276325	0.682267	ko00261	Metabolism	Biosynthesis of other secondary metabolites	9061	K13811
Lysine biosynthesis	1	2	0.276325	0.682267	ko00300	Metabolism	Amino acid metabolism	501	K14085
Sulfur metabolism	4	18	0.276769	0.682267	ko00920	Metabolism	Energy metabolism	9061;23510;7263;79734	K13811+K01011
Prolactin signaling pathway	18	104	0.28558	0.696441	ko04917	Organismal Systems	Endocrine system	23533;9021;4790;6776;5594;3717;3845;6590;6654;6714;1154;8651;90780;79153;9649;10000;8600;10750	K02649+K04696+K02580+K11223+K04371+K04447+K07827+K17106+K03099+K05704+K04701+K04694+K06279+K04456+K05473+K04364
Pathogenic Escherichia coli infection	21	123	0.286899	0.696441	ko05130	Human Diseases	Infectious diseases: Bacterial	60;7846;117289;10376;7277;9181;55784;10095;10092;7100;6903;84790;9475;6461;4690;2534;81873;81027;151827;347688;10381	K05692+K07374+K08007+K12791+K02677+K05757+K05754+K10168+K17388+K19862+K06619+K07365+K05703+K07375
Prion diseases	17	99	0.304793	0.729036	ko05020	Human Diseases	Neurodegenerative diseases	3553;5594;3552;2002;8904;5621;8895;79153;4855;2534;79836;5567;3915;3569;151835;57493;4854	K04519+K04371+K04383+K04375+K06491+K05634+K02599+K05703+K09553+K04345+K05635+K05405
Folate biosynthesis	4	19	0.312641	0.729036	ko00790	Metabolism	Metabolism of cofactors and vitamins	2643;126549;51562;10243	K01495+K01077+K03635+K15376
Oxytocin signaling pathway	42	260	0.313843	0.729036	ko04921	Organismal Systems	Endocrine system	60;3725;10645;5594;3759;1026;5330;55784;4660;805;5499;3845;113;2002;57172;4208;5501;5562;6714;5571;25959;9475;7226;115;55657;5532;79153;3710;2983;783;4773;4846;94059;5567;815;782;3768;817;2775;1956;8536;8605	K05692+K04448+K07359+K04371+K04996+K06625+K05858+K02677+K12329+K02183+K06269+K07827+K08047+K04375+K08794+K04454+K07198+K05704+K07200+K17388+K04977+K08049+K04961+K04348+K04960+K12319+K04863+K17332+K13242+K19663+K04345+K04515+K04862+K05005+K04534+K04361+K16342
Arginine biosynthesis	5	25	0.31422	0.729036	ko00220	Metabolism	Amino acid metabolism	79903;383;4846;2806;4843	K11067+K01476+K13242+K14455+K13241
cAMP signaling pathway	48	299	0.315027	0.729036	ko04024	Environmental Information Processing	Signal transduction	4792;23533;135;9586;359948;4790;5142;3725;490;8843;5594;7409;493;64411;338442;51;805;5499;113;5501;673;25959;9475;5806;64764;2550;5732;115;5144;79153;54855;154;56670;5567;10411;815;5727;491;7074;85442;10000;817;115572;2905;3991;610;55289;5139	K04734+K02649+K04266+K09047+K04498+K02580+K13293+K04448+K05850+K08402+K04371+K05730+K12490+K00232+K02183+K06269+K08047+K04365+K17388+K01115+K09048+K04615+K04259+K08049+K05742+K04142+K10042+K04345+K08014+K04515+K06225+K05731+K04351+K04456+K05211+K07188+K04955+K19021
Cocaine addiction	11	62	0.316811	0.729036	ko05030	Human Diseases	Substance dependence	9586;4790;3725;1388;64764;5567;100133301;126006;2905;6531;5173	K09047+K02580+K04448+K09049+K09048+K04345+K04605+K15839+K05211+K05036+K15840
GABAergic synapse	20	119	0.318953	0.729036	ko04727	Organismal Systems	Nervous system	54331;4302;2790;55784;113;18;6714;23042;81539;2550;115;4905;773;94059;5567;552891;92745;2775;2562;10243	K07826+K05175+K04545+K02677+K08047+K13524+K05704+K01580+K14990+K04615+K08049+K06027+K04344+K19663+K04345+K14992+K04534+K05181+K15376
Fatty acid degradation	10	56	0.321694	0.729036	ko00071	Metabolism	Lipid metabolism	39;51703;51;1375;3030;79746;501;34;84320;55289	K00626+K01897+K00232+K19523+K07515+K07511+K14085+K00249+K13239
Antifolate resistance	10	56	0.321694	0.729036	ko01523	Human Diseases	Drug resistance: Antineoplastic	3553;4790;7124;84641;2352;10057;283537;3569;471;8714	K04519+K02580+K03156+K14613+K13649+K05668+K05405+K00602+K05667
Endocrine resistance	29	177	0.323252	0.729036	ko01522	Human Diseases	Drug resistance: Antineoplastic	23533;3725;5594;1026;6667;1027;3845;113;673;6654;6714;6199;5469;115;90780;79153;4855;9649;1839;5567;28514;596;1031;54567;10000;57493;1956;4854;10750	K02649+K04448+K04371+K06625+K04684+K06624+K07827+K08047+K04365+K03099+K05704+K04688+K15144+K08049+K06279+K02599+K08523+K04345+K06051+K02161+K06622+K04456+K04361+K04364
Valine, leucine and isoleucine degradation	11	63	0.336541	0.729897	ko00280	Metabolism	Amino acid metabolism	39;18;3030;79746;549;501;5096;34;55268;259307;5019	K00626+K13524+K07515+K07511+K05607+K14085+K01966+K00249+K03334+K01027
Aldosterone-regulated sodium reabsorption	11	63	0.336541	0.729897	ko04960	Organismal Systems	Excretory system	23533;6446;5594;55784;3845;160622;79153;94059;4306;3291;6340	K02649+K13302+K04371+K02677+K07827+K13358+K19663+K08555+K00071+K04827
Caffeine metabolism	2	8	0.340619	0.729897	ko00232	Metabolism	Biosynthesis of other secondary metabolites	1548;1549	K17683
Vitamin B6 metabolism	2	8	0.340619	0.729897	ko00750	Metabolism	Metabolism of cofactors and vitamins	8566;57026	K00868+K07758
Phagosome	52	328	0.341	0.729897	ko04145	Cellular Processes	Transport and catabolism	653361;60;2215;7846;2204;10376;11151;2214;4689;537;7277;1536;3684;10333;79415;51279;5869;3678;55729;2210;3122;528;9852;2209;9341;84034;9296;63901;718;9554;6903;84790;4973;2213;3135;254013;3117;7057;79038;3113;3077;3115;81027;155066;285782;3693;151827;347688;245973;10381;3690;51435	K08011+K05692+K06463+K07374+K06513+K13882+K08012+K03662+K08008+K06461+K10169+K01368+K01330+K07888+K06484+K06498+K06752+K02148+K13505+K12478+K02151+K03990+K08517+K08763+K12560+K06751+K16857+K00921+K07375+K02153+K06588+K06493+K10062
Biosynthesis of unsaturated fatty acids	6	32	0.341386	0.729897	ko01040	Metabolism	Lipid metabolism	51;83693;3030;6319;79071;55289	K00232+K10251+K07515+K00507+K10203
Platinum drug resistance	21	127	0.341423	0.729897	ko01524	Human Diseases	Drug resistance: Antineoplastic	23533;330;5594;1026;637;317;329;79903;472;5366;27245;538;79153;578;540;672;8772;57507;596;10000;7153	K02649+K16060+K04371+K06625+K04726+K02084+K14021+K04728+K10131+K02350+K17686+K10605+K02373+K10847+K02161+K04456+K03164
Selenocompound metabolism	5	26	0.345695	0.729897	ko00450	Metabolism	Metabolism of other amino acids	9061;22928;883;51540;92935	K13811+K01008+K00816+K01763+K01874
Glioma	20	121	0.347427	0.729897	ko05214	Human Diseases	Cancers: Specific types	23533;5594;1026;55784;805;3845;7039;673;6654;90780;79153;5335;9649;94059;1021;815;10000;817;1956;10750	K02649+K04371+K06625+K02677+K02183+K07827+K08774+K04365+K03099+K06279+K01116+K19663+K02091+K04515+K04456+K04361+K04364
Taurine and hypotaurine metabolism	4	20	0.348882	0.729897	ko00430	Metabolism	Metabolism of other amino acids	23042;2687;91227;92086	K01580+K01594+K18966+K18592
Thiamine metabolism	4	20	0.348882	0.729897	ko00730	Metabolism	Metabolism of cofactors and vitamins	126549;205;9054;84284	K01077+K00939+K04487+K06928
Autoimmune thyroid disease	14	83	0.354495	0.736794	ko05320	Human Diseases	Immune diseases	3122;3135;5551;6641;3117;445347;3002;3113;3077;3115;1493;959;958;941	K06752+K06751+K07818+K00431+K10785+K01353+K06538+K03161+K03160+K05412
Long-term depression	16	96	0.357852	0.738942	ko04730	Organismal Systems	Nervous system	5594;5330;55784;3845;673;55657;79153;773;3710;2983;94059;5516;2768;2767;2775;8605	K04371+K05858+K02677+K07827+K04365+K04961+K04344+K04960+K12319+K19663+K04382+K04346+K04635+K04534+K16342
Galactose metabolism	10	58	0.363703	0.741395	ko00052	Metabolism	Carbohydrate metabolism	2683;3101;93432;7360;5236;2720;55276;2584;197021;643853	K07966+K00844+K12047+K00963+K01835+K12309+K15779+K00849+K01229
ABC transporters	10	58	0.363703	0.741395	ko02010	Environmental Information Processing	Membrane transport	19;10060;9619;10057;89845;225;5243;10058;21;8714	K05641+K05033+K05679+K05668+K05674+K05676+K05658+K05661+K05643+K05667
Tight junction	50	318	0.368215	0.742267	ko04530	Cellular Processes	Cellular community - eukaryotes	60;7846;117289;10376;3725;87;7277;9181;4214;9467;9368;84034;153020;123720;133746;5562;93643;6903;84790;6714;5571;9414;9475;10207;9080;10615;6641;24146;5932;55691;9258;4734;5516;5567;152206;376132;90378;79917;7074;85442;285782;1741;7082;151827;51421;23255;154796;9076;23562;57530	K05692+K07374+K08007+K04448+K05699+K12791+K04416+K10352+K13365+K08018+K20479+K07198+K06105+K05704+K07200+K06098+K17388+K06092+K06087+K12076+K05763+K05762+K16175+K10591+K04382+K04345+K04431+K05631+K05731+K12075+K05701+K06104+K16819+K06102
Apoptosis - multiple species	12	71	0.368799	0.742267	ko04215	Cellular Processes	Cell growth and death	330;7132;637;317;329;10018;79903;5366;578;8772;596;5414	K16060+K03158+K04726+K02084+K16341+K14021+K10131+K02373+K02161+K16943
Glycerolipid metabolism	14	84	0.372093	0.744187	ko00561	Metabolism	Lipid metabolism	9663;11343;84803;10555;8613;10327;84173;55326;56894;501;57678;150763;8611;139189	K15728+K01054+K13506+K13509+K01080+K00002+K00629+K19007+K13523+K14085+K00901
Amino sugar and nucleotide sugar metabolism	15	91	0.381806	0.758839	ko00520	Metabolism	Carbohydrate metabolism	3101;7360;51005;5236;80146;55276;51706;2584;10007;5373;54187;6675;3073;51700;92106	K00844+K00963+K01443+K01835+K08678+K15779+K00326+K00849+K02564+K17497+K05304+K00972+K12373
Glucagon signaling pathway	22	137	0.390783	0.771856	ko04922	Organismal Systems	Endocrine system	9586;359948;5836;5330;5223;805;1375;2308;5562;6513;5571;64764;5160;5532;3945;114932;3710;5567;815;10000;817;2642	K09047+K04498+K00688+K05858+K01834+K02183+K19523+K07201+K07198+K07299+K07200+K09048+K00161+K04348+K00016+K07190+K04960+K04345+K04515+K04456+K04583
Phenylalanine, tyrosine and tryptophan biosynthesis	2	9	0.398131	0.778257	ko00400	Metabolism	Amino acid metabolism	2806;259307	K14455+K03334
Notch signaling pathway	15	92	0.398918	0.778257	ko04330	Environmental Information Processing	Signal transduction	359948;5663;23220;3955;166;3065;4855;1856;7088;28514;196403;54567;57493;7089;4854	K04498+K04505+K06058+K05948+K04497+K06067+K02599+K02353+K06051
Synaptic vesicle cycle	14	86	0.407597	0.788149	ko04721	Organismal Systems	Nervous system	528;9296;5864;4905;63908;773;112755;23025;10814;8218;55011;155066;388125;245973	K02148+K02151+K07882+K06027+K15296+K04344+K08486+K15293+K15294+K04646+K12302+K02153+K15290
Renin-angiotensin system	5	28	0.408945	0.788149	ko04614	Organismal Systems	Endocrine system	4311;5547;4012;57486;1636	K01389+K01285+K01257+K01393+K01283
Longevity regulating pathway - worm	20	126	0.420563	0.804461	ko04212	Organismal Systems	Aging	6648;3091;847;7428;4502;3281;6199;55711;4501;116138;221960;2729;6319;1549;4494;10000;4495;4489;23089;100506164	K04564+K08268+K03781+K03871+K14739+K19765+K04688+K13356+K14966+K08269+K11204+K00507+K07418+K04456+K10798+K09414
Glycosaminoglycan biosynthesis - heparan sulfate / heparin	6	35	0.426538	0.804461	ko00534	Metabolism	Glycan biosynthesis and metabolism	9953;9653;84817;79746;64132;23089	K07809+K02513+K00771+K02366+K08103
Arrhythmogenic right ventricular cardiomyopathy (ARVC)	24	153	0.430517	0.804461	ko05412	Human Diseases	Cardiovascular diseases	60;10618;1824;3678;1495;3676;79792;6932;51176;56951;3672;3695;3696;783;60437;1000;83439;782;5318;3679;3675;3693;2697;3690	K05692+K04490+K07601+K06484+K05691+K06483+K12642+K02620+K04492+K06480+K06590+K06591+K04863+K06736+K04862+K06583+K06482+K06588+K07372+K06493
Leukocyte transendothelial migration	34	219	0.430857	0.804461	ko04670	Organismal Systems	Immune system	653361;3383;60;7852;23533;5829;117289;5175;87;4689;3987;1536;3684;7409;55784;1495;3676;79892;9475;399;9080;3702;24146;5335;55691;96626;7294;94059;7041;10411;51299;85442;9076;23562	K08011+K06490+K05692+K04189+K02649+K05760+K08007+K06471+K05699+K08012+K08008+K06461+K05730+K02677+K05691+K06483+K05700+K17388+K07873+K06087+K07363+K01116+K05763+K08016+K19663+K08014+K05726+K04351
Calcium signaling pathway	43	279	0.435825	0.804461	ko04020	Environmental Information Processing	Signal transduction	135;5724;490;10105;493;100130357;5330;3274;8877;55784;805;113;5025;2769;6786;10800;6915;115;55657;5532;5335;773;114932;3710;154;4846;94059;3269;445347;5567;8911;815;491;57105;887;2767;817;2905;1956;4843;89832;5026;3356	K04266+K04279+K05850+K09565+K04264+K05858+K04150+K04718+K02677+K02183+K08047+K05218+K04637+K16059+K04322+K08049+K04961+K04348+K01116+K04344+K07190+K04960+K04142+K13242+K19663+K04149+K10785+K04345+K04856+K04515+K04323+K04195+K04635+K05211+K04361+K13241+K04809+K05219+K04157
Mineral absorption	11	68	0.437404	0.804461	ko04978	Organismal Systems	Digestive system	6279;4891;30061;4502;140803;4501;643641;65010;4494;4495;4489	K14734+K12347+K14685+K14739+K04981+K14704
Ovarian steroidogenesis	11	68	0.437404	0.804461	ko04913	Organismal Systems	Endocrine system	240;3949;9852;113;115;1545;3292;5567;1588;1549;8605	K00461+K12473+K13373+K08047+K08049+K07410+K00044+K04345+K07434+K07418+K16342
Rap1 signaling pathway	57	372	0.437647	0.804461	ko04015	Environmental Information Processing	Signal transduction	60;3937;5900;23533;135;2533;7094;7422;10875;5606;54518;5594;3684;5330;64411;55784;8935;10636;805;1435;3845;113;153020;1399;673;79811;6714;1436;25780;115;79153;5335;7057;1268;51015;8631;94059;445347;2256;1942;10411;7010;4233;3082;79917;7074;51299;85442;10000;53834;1969;260425;2247;2775;1956;57121;3690	K05692+K07361+K08732+K02649+K04266+K17698+K06271+K05448+K05466+K04432+K17704+K04371+K06461+K05858+K12490+K02677+K17699+K17706+K02183+K05453+K07827+K08047+K06277+K08018+K04438+K04365+K05090+K05704+K12362+K08049+K01116+K16857+K04277+K19663+K10785+K04358+K05462+K08014+K05121+K05099+K05460+K05631+K05629+K05731+K05726+K04351+K08019+K04456+K05095+K05094+K05103+K06112+K18497+K04534+K04361+K08390+K06493
Amphetamine addiction	17	108	0.447256	0.817398	ko05031	Human Diseases	Substance dependence	9586;3725;55784;805;5499;1388;5501;25959;64764;5532;94059;5567;815;817;2905;6531;5173	K09047+K04448+K02677+K02183+K06269+K09049+K09048+K04348+K19663+K04345+K04515+K05211+K05036+K15840
Phosphonate and phosphinate metabolism	2	10	0.453174	0.821537	ko00440	Metabolism	Metabolism of other amino acids	56994;5833	K00994+K00967
Terpenoid backbone biosynthesis	6	36	0.454687	0.821537	ko00900	Metabolism	Metabolism of terpenoids and polyketides	3422;4597;39;85415;4598;78991	K01823+K01597+K00626+K01770+K00869+K05906
Vasopressin-regulated water reabsorption	9	56	0.461686	0.825694	ko04962	Organismal Systems	Excretory system	9586;6810;5869;64764;115;4905;360;8655;5567	K09047+K13502+K07888+K09048+K08049+K06027+K09876+K10418+K04345
Complement and coagulation cascades	28	182	0.463299	0.825694	ko04610	Organismal Systems	Immune system	5328;5329;9750;1604;1378;414236;7056;3684;719;2153;51279;718;2157;2152;54953;27076;100293534;81606;10747;5055;5343;390940;7980;629;10216;462;3075;1380	K01348+K03985+K04006+K04011+K03907+K06461+K04009+K03902+K01330+K03990+K03899+K03901+K03989+K04010+K03993+K19821+K01315+K03909+K01335+K06251+K03911+K04004+K04012
Pentose phosphate pathway	7	43	0.466182	0.825694	ko00030	Metabolism	Carbohydrate metabolism	6888;5226;5236;55276;8277;64080;51071	K00616+K00033+K01835+K15779+K00615+K00852+K01619
Phenylalanine metabolism	5	30	0.471269	0.825694	ko00360	Metabolism	Amino acid metabolism	314;3242;218;2806;259307	K00276+K00457+K00129+K14455+K03334
Lipoic acid metabolism	1	4	0.476313	0.825694	ko00785	Metabolism	Metabolism of cofactors and vitamins	51601	K10105
Homologous recombination	11	70	0.47776	0.825694	ko03440	Genetic Information Processing	Replication and repair	4683;100130357;472;63035;11073;80198;672;25788;100861412;5893;342125	K10867+K04482+K04728+K10683+K10728+K08991+K10605+K10877+K10873
Ether lipid metabolism	11	70	0.47776	0.825694	ko00565	Metabolism	Lipid metabolism	79888;7368;5806;8613;254531;56994;7941;5050;93594;8605;8611	K13510+K04628+K01115+K01080+K13512+K00994+K01062+K16795+K16794+K16342
Arginine and proline metabolism	11	70	0.47776	0.825694	ko00330	Metabolism	Amino acid metabolism	51582;26;383;4868;65263;4846;8659;501;122945;2806;4843	K01581+K11182+K01476+K11394+K00286+K13242+K00294+K14085+K14455+K13241
Mucin type O-glycan biosynthesis	6	37	0.482496	0.827863	ko00512	Metabolism	Glycan biosynthesis and metabolism	9334;6482;29071;79623;4704;9245	K09905+K00780+K09653+K00710+K09662
cGMP-PKG signaling pathway	38	251	0.490137	0.827863	ko04022	Environmental Information Processing	Signal transduction	9586;490;10105;5594;493;5330;10335;5138;340527;805;5499;6722;113;1388;151;4208;5501;25959;9475;64764;115;255520;5532;79153;84163;8654;3710;2983;154;4773;84173;4846;2768;27094;491;10000;2767;5139	K09047+K05850+K09565+K04371+K05858+K12337+K18283+K07187+K02183+K06269+K04378+K08047+K09049+K04139+K04454+K17388+K09048+K08049+K04348+K03121+K13762+K04960+K12319+K04142+K17332+K13242+K04346+K04939+K04456+K04635+K19021
Steroid hormone biosynthesis	13	84	0.490749	0.827863	ko00140	Metabolism	Lipid metabolism	9852;83693;1545;3292;1646;412;1645;1588;3291;1581;6715;3290;1312	K13373+K10251+K07410+K00044+K00089+K00212+K01131+K07434+K00071+K00489+K12343+K15680+K00545
Glycosphingolipid biosynthesis - globo and isoglobo series	4	24	0.491315	0.827863	ko00603	Metabolism	Glycan biosynthesis and metabolism	6482;3073;53947;106865373	K00780+K12373+K01988+K03877
Oocyte meiosis	29	191	0.492032	0.827863	ko04114	Cellular Processes	Cell growth and death	51307;5594;132864;5525;805;6197;5499;113;7531;5501;7533;25959;996;115;5532;79153;9700;51434;3710;153733;5516;124222;5567;815;83694;817;8697;367;9088	K05867+K04371+K02602+K11584+K02183+K04373+K06269+K08047+K06630+K16198+K03350+K08049+K04348+K02365+K03354+K04960+K06636+K04382+K06633+K04345+K04515+K03355+K08557
Thyroid hormone synthesis	14	91	0.496435	0.830876	ko04918	Organismal Systems	Endocrine system	9586;5330;55784;113;1388;9988;2878;64764;115;6641;3710;94059;5567;2877	K09047+K05858+K02677+K08047+K09049+K15225+K00432+K09048+K08049+K00431+K04960+K19663+K04345
Purine metabolism	37	246	0.508236	0.846174	ko00230	Metabolism	Nucleotide metabolism	5142;283149;5138;113;9061;131870;221830;11164;1810;51251;5432;10623;5236;58497;51816;55276;115;5144;205;84265;8654;80209;2983;92014;1633;5151;56654;318;471;84284;100;23089;115024;5149;5148;5139;56655	K13293+K03006+K18283+K08047+K13811+K16855+K03004+K13987+K02326+K01081+K03011+K03023+K01835+K01514+K19572+K15779+K08049+K00939+K03024+K13762+K12319+K01587+K00893+K18437+K01509+K01518+K00602+K06928+K01488+K18438+K13760+K13759+K19021+K03506
Glycosphingolipid biosynthesis - lacto and neolacto series	7	45	0.516706	0.855795	ko00601	Metabolism	Glycan biosynthesis and metabolism	2683;2526;2529;2528;8702;53947;106865373	K07966+K07632+K07635+K07634+K07969+K01988+K03877
Alanine, aspartate and glutamate metabolism	8	52	0.522647	0.858174	ko00250	Metabolism	Amino acid metabolism	18;23042;57494;8659;440;790;2806;259307	K13524+K01580+K18310+K00294+K01953+K11540+K14455+K03334
p53 signaling pathway	20	133	0.52354	0.858174	ko04115	Cellular Processes	Cell growth and death	4616;3732;51246;1026;637;317;472;5366;149345;6477;143686;3487;9538;7057;9540;84859;1643;1021;63970;401124	K04402+K06509+K10135+K06625+K04726+K02084+K04728+K10131+K04506+K10141+K10138+K10134+K16857+K10133+K10130+K10140+K02091+K13773
Thyroid hormone signaling pathway	31	208	0.534398	0.862546	ko04919	Organismal Systems	Endocrine system	60;23533;3091;359948;5594;5330;55784;7067;3845;2308;6257;3065;6513;6714;8841;5469;79153;4855;5335;54855;650;94059;9882;116931;5567;4609;10000;115572;57493;4854;3690	K05692+K02649+K08268+K04498+K04371+K05858+K02677+K05547+K07827+K07201+K08525+K06067+K07299+K05704+K11404+K15144+K02599+K01116+K05742+K04662+K19663+K17902+K15162+K04345+K04377+K04456+K06493
Morphine addiction	19	127	0.534474	0.862546	ko05032	Human Diseases	Substance dependence	54331;5142;4302;2790;55784;5138;113;2550;115;5144;773;94059;5567;5151;552891;2775;2562;23089;5139	K07826+K13293+K05175+K04545+K02677+K18283+K08047+K04615+K08049+K04344+K19663+K04345+K18437+K04534+K05181+K18438+K19021
Mannose type O-glycan biosynthesis	6	39	0.536647	0.862546	ko00515	Metabolism	Glycan biosynthesis and metabolism	2683;2526;6388;54097;55624;27087	K07966+K07632+K00728+K09666+K00735
Glutathione metabolism	11	73	0.537057	0.862546	ko00480	Metabolism	Metabolism of other amino acids	51582;5226;2878;26873;375686;2687;3417;91227;2729;2877;92086	K01581+K00033+K00432+K01469+K18592+K00031+K11204
Retrograde endocannabinoid signaling	21	141	0.541297	0.864988	ko04723	Organismal Systems	Nervous system	54331;4302;5594;5330;2790;55784;113;11343;115;79153;773;3710;1268;94059;747;5567;55011;2166;552891;2775;2562	K07826+K05175+K04371+K05858+K04545+K02677+K08047+K01054+K08049+K04344+K04960+K04277+K19663+K13806+K04345+K12302+K15528+K04534+K05181
Fluid shear stress and atherosclerosis	37	250	0.550722	0.875648	ko05418	Human Diseases	Cardiovascular diseases	3553;653361;3383;60;23533;8878;5175;4790;3725;7422;7056;754;1536;9181;7124;7132;3554;1906;3552;805;6416;4208;5562;6714;650;90;4846;6385;387082;90378;596;10000;857;6347;6382;2817;3690	K04519+K08011+K06490+K05692+K02649+K14381+K06471+K02580+K04448+K05448+K03907+K12160+K08008+K12791+K03156+K03158+K04386+K16366+K04383+K02183+K04430+K04454+K07198+K05704+K04662+K04675+K13242+K16338+K04431+K02161+K04456+K06278+K14624+K06257+K08107+K06493
Gastric acid secretion	18	123	0.575731	0.910099	ko04971	Organismal Systems	Digestive system	117289;3759;5330;3274;55784;805;113;760;115;54855;3710;94059;5567;815;887;817;115572;496	K08007+K04996+K05858+K04150+K02677+K02183+K08047+K18245+K08049+K05742+K04960+K19663+K04345+K04515+K04195+K01543
Adrenergic signaling in cardiomyocytes	32	219	0.582173	0.910099	ko04261	Organismal Systems	Circulatory system	9586;490;5594;493;5330;55784;5525;805;5499;113;1388;6324;5501;25959;64764;115;79153;54855;79677;154;783;5516;5567;10411;815;596;782;491;85442;10000;817;115572	K09047+K05850+K04371+K05858+K02677+K11584+K02183+K06269+K08047+K09049+K04845+K09048+K08049+K05742+K17751+K04142+K04863+K04382+K04345+K08014+K04515+K02161+K04862+K04351+K04456
Butanoate metabolism	7	48	0.588871	0.910099	ko00650	Metabolism	Carbohydrate metabolism	79944;39;18;23042;3030;79746;5019	K00109+K00626+K13524+K01580+K07515+K07511+K01027
Non-homologous end-joining	3	20	0.591825	0.910099	ko03450	Genetic Information Processing	Replication and repair	7520;55303;7518	K10885+K10884+K10886
Ribosome biogenesis in eukaryotes	19	131	0.592308	0.910099	ko03008	Genetic Information Processing	Translation	144404;22803;1736;9813;7514;83732;9994;1457;55813;10248;51367;29102;2091;138716;55127;23078;10436;79064;79613	K14574+K12619+K11131+K14570+K14290+K07178+K14572+K03097+K14557+K14527+K03537+K03685+K14563+K14525+K14550+K14568+K14284+K14548
Progesterone-mediated oocyte maturation	19	131	0.592308	0.910099	ko04914	Organismal Systems	Endocrine system	23533;51307;5594;132864;6197;3845;113;673;996;994;115;79153;51434;124222;5567;83694;10000;8697;9088	K02649+K05867+K04371+K02602+K04373+K07827+K08047+K04365+K03350+K05866+K08049+K03354+K06633+K04345+K04456+K03355
Cysteine and methionine metabolism	10	69	0.592423	0.910099	ko00270	Metabolism	Amino acid metabolism	23510;4144;1788;23743;7263;3945;2729;79734;2806;259307	K01011+K00789+K17398+K00547+K00544+K00016+K11204+K14455+K03334
Synthesis and degradation of ketone bodies	2	13	0.599075	0.915289	ko00072	Metabolism	Lipid metabolism	39;5019	K00626+K01027
Salivary secretion	24	166	0.601558	0.915289	ko04970	Organismal Systems	Digestive system	490;4069;493;5330;55784;805;113;115;820;54855;3710;2983;154;55020;94059;5567;6558;4586;727897;491;115572;145407;3783;106865373	K05850+K13915+K05858+K02677+K02183+K08047+K08049+K13916+K05742+K04960+K12319+K04142+K13912+K19663+K04345+K10951+K13908+K04945
Bile secretion	13	91	0.613642	0.92923	ko04976	Organismal Systems	Digestive system	366;3949;113;760;6513;115;54855;5567;1581;115572;5243;8714;343	K09877+K12473+K08047+K18245+K07299+K08049+K05742+K04345+K00489+K05658+K05667+K09869
Longevity regulating pathway	22	154	0.623725	0.940021	ko04211	Organismal Systems	Aging	6648;23533;9586;4790;10645;847;317649;767558;340527;3845;113;1388;2308;5562;5571;6199;64764;143686;115;221960;5567;10000	K04564+K02649+K09047+K02580+K07359+K03781+K03259+K11420+K07187+K07827+K08047+K09049+K07201+K07198+K07200+K04688+K09048+K10141+K08049+K08269+K04345+K04456
Amyotrophic lateral sclerosis (ALS)	15	106	0.630883	0.946324	ko05014	Human Diseases	Neurodegenerative diseases	5606;7124;7132;84134;637;847;317;7158;5532;389384;51015;440068;596;2905;4744	K04432+K03156+K03158+K11518+K04726+K03781+K02084+K04574+K04348+K01370+K02161+K05211
Histidine metabolism	5	36	0.64092	0.956866	ko00340	Metabolism	Amino acid metabolism	117289;26;218;501;55071	K01468+K11182+K00129+K14085+K19787
Circadian entrainment	22	156	0.648717	0.963982	ko04713	Organismal Systems	Environmental adaptation	54331;5594;5330;2790;55784;805;113;115;55657;79153;3710;2983;94059;5567;8911;815;9722;552891;817;2905;51655;2775	K07826+K04371+K05858+K04545+K02677+K02183+K08047+K08049+K04961+K04960+K12319+K19663+K04345+K04856+K04515+K16513+K05211+K07843+K04534
Starch and sucrose metabolism	8	58	0.652139	0.964559	ko00500	Metabolism	Carbohydrate metabolism	5836;3101;2992;93432;7360;5236;2632;55276	K00688+K00844+K00750+K12047+K00963+K01835+K00700+K15779
Serotonergic synapse	22	157	0.660901	0.967673	ko04726	Organismal Systems	Nervous system	54331;240;5594;5330;2790;55784;3845;9177;673;6532;79153;773;3710;94059;5567;10411;1549;552891;2775;2562;3356;8605	K07826+K00461+K04371+K05858+K04545+K02677+K07827+K04819+K04365+K05037+K04344+K04960+K19663+K04345+K08014+K07418+K04534+K05181+K04157+K16342
Biosynthesis of amino acids	14	101	0.661031	0.967673	ko01230	Metabolism	Global and overview maps	6888;5223;79903;4144;383;8277;65263;3417;2026;2027;501;122945;2806;128178	K00616+K01834+K11067+K00789+K01476+K00615+K00286+K00031+K01689+K14085+K14455
Sphingolipid signaling pathway	27	192	0.663373	0.967673	ko04071	Environmental Information Processing	Signal transduction	23533;4790;5594;5330;7124;7132;637;8877;55784;5525;8698;3845;64231;9475;5806;130367;79153;8717;2534;6610;1901;4846;94059;5516;2768;596;10000	K02649+K02580+K04371+K05858+K03156+K03158+K04726+K04718+K02677+K11584+K04293+K07827+K08090+K17388+K01115+K04717+K03171+K05703+K12351+K04288+K13242+K19663+K04382+K04346+K02161+K04456
Platelet activation	35	249	0.678333	0.97362	ko04611	Organismal Systems	Immune system	60;3937;23533;7094;54518;5594;100130357;5330;5499;8773;113;6786;5501;1277;695;6714;25959;9475;6915;100170841;115;5739;79153;2534;3710;2983;170463;4846;5567;2812;10000;8292;23365;8605;3690	K05692+K07361+K02649+K06271+K17704+K04371+K04264+K05858+K06269+K08508+K08047+K16059+K06236+K07370+K05704+K17388+K19720+K08049+K04263+K05703+K04960+K12319+K13242+K04345+K06262+K04456+K07532+K16342+K06493
Protein processing in endoplasmic reticulum	35	249	0.678333	0.97362	ko04141	Genetic Information Processing	Folding, sorting and degradation	23645;7494;10970;3303;3310;1649;5034;10802;137886;22926;9451;22872;823;1388;30001;79903;10960;3304;80267;9871;10484;51619;29095;10130;578;3306;23231;79886;90378;27248;55011;596;143630;401647;3998	K14019+K09027+K13999+K03283+K04452+K09580+K14007+K14012+K09054+K08860+K14005+K01367+K09049+K10950+K14021+K10082+K10086+K14006+K06689+K12667+K09584+K14026+K14018+K04431+K14008+K07765+K02161+K04523+K05546+K10080
Vascular smooth muscle contraction	28	201	0.685064	0.97362	ko04270	Organismal Systems	Circulatory system	135;5594;5330;55784;4660;9826;10335;805;5499;113;5501;673;25959;9475;5583;115;5739;79153;10268;3710;2983;94059;2768;5567;27094;2767;23365;8605	K04266+K04371+K05858+K02677+K12329+K12331+K12337+K02183+K06269+K08047+K04365+K17388+K18051+K08049+K04263+K08449+K04960+K12319+K19663+K04346+K04345+K04939+K04635+K07532+K16342
Vibrio cholerae infection	15	110	0.688831	0.97362	ko05110	Human Diseases	Infectious diseases: Bacterial	60;537;55784;528;30001;9296;9414;115;5335;11015;5567;6558;155066;7082;245973	K05692+K03662+K02677+K02148+K10950+K02151+K06098+K08049+K01116+K10949+K04345+K10951+K02153+K05701
Glycolysis / Gluconeogenesis	15	110	0.688831	0.97362	ko00010	Metabolism	Carbohydrate metabolism	5223;3101;5236;55902;55276;5160;669;218;3945;10327;2026;2027;501;23255;128178	K01834+K00844+K01835+K01895+K15779+K00161+K01837+K00129+K00016+K00002+K01689+K14085
Glycosaminoglycan degradation	5	38	0.689283	0.97362	ko00531	Metabolism	Glycan biosynthesis and metabolism	6448;2720;3073;643853;24142	K01565+K12309+K12373+K01197
Tyrosine metabolism	8	60	0.69043	0.97362	ko00350	Metabolism	Amino acid metabolism	314;3242;6641;218;151313;2806;259307;1312	K00276+K00457+K00431+K00129+K01557+K14455+K03334+K00545
Melanoma	13	96	0.691944	0.97362	ko05218	Human Diseases	Cancers: Specific types	23533;5594;1026;3845;673;79153;1021;2256;4233;3082;10000;2247;1956	K02649+K04371+K06625+K07827+K04365+K02091+K04358+K05099+K05460+K04456+K18497+K04361
Dopaminergic synapse	27	196	0.705546	0.988228	ko04728	Organismal Systems	Nervous system	54331;9586;5330;2790;55784;5525;805;5499;1388;5501;25959;64764;5532;773;3710;94059;5516;5567;815;10000;552891;27065;817;51617;6531;2775;1312	K07826+K09047+K05858+K04545+K02677+K11584+K02183+K06269+K09049+K09048+K04348+K04344+K04960+K19663+K04382+K04345+K04515+K04456+K15493+K05036+K04534+K00545
Pyruvate metabolism	8	61	0.708541	0.988228	ko00620	Metabolism	Carbohydrate metabolism	39;55902;5160;3945;3029;501;2739;23255	K00626+K01895+K00161+K00016+K01069+K14085+K01759
2-Oxocarboxylic acid metabolism	3	24	0.717198	0.995934	ko01210	Metabolism	Global and overview maps	79903;3417;2806	K11067+K00031+K14455
Taste transduction	13	98	0.720456	0.996109	ko04742	Organismal Systems	Sensory system	4302;9177;8645;2550;773;3710;80835;6335;255022;259286;5567;56654;6340	K05175+K04819+K04916+K04615+K04344+K04960+K04624+K04841+K19738+K08474+K04345+K01509+K04827
Glutamatergic synapse	22	164	0.739661	1	ko04724	Organismal Systems	Nervous system	54331;5594;5330;2790;55784;113;81539;5806;115;5532;79153;773;3710;94059;5567;55011;9456;552891;100133301;2905;2775;8605	K07826+K04371+K05858+K04545+K02677+K08047+K14990+K01115+K08049+K04348+K04344+K04960+K19663+K04345+K12302+K15010+K04605+K05211+K04534+K16342
Nitrogen metabolism	3	25	0.7434	1	ko00910	Metabolism	Energy metabolism	762;760;5806	K18246+K18245+K01672
Pyrimidine metabolism	20	151	0.753074	1	ko00240	Metabolism	Nucleotide metabolism	283149;51733;221830;1806;1810;51251;5432;10623;1854;84265;80209;1633;139596;790;7083;318;1635;79077;115024;56655	K03006+K01431+K03004+K00207+K02326+K01081+K03011+K03023+K01520+K03024+K00893+K00761+K11540+K00857+K01518+K01493+K16904+K03506
Hedgehog signaling pathway - fly	5	41	0.753115	1	ko04341	Environmental Information Processing	Signal transduction	1454;51684;650;5567;5727	K08960+K06229+K04662+K04345+K06225
Alzheimer's disease	32	237	0.758667	1	ko05010	Human Diseases	Neurodegenerative diseases	3553;6653;4311;5594;5663;5330;7124;7132;637;22926;317;805;9451;823;102;4729;6391;4709;5532;79153;4728;4712;8772;539;3710;25825;8883;54097;2905;3416;23621;4704	K04519+K04550+K01389+K04371+K04505+K05858+K03156+K03158+K04726+K09054+K02084+K02183+K08860+K01367+K06704+K03943+K00236+K03959+K04348+K03941+K03962+K02373+K02137+K04960+K07747+K04532+K05211+K01408+K04521+K03953
DNA replication	6	49	0.759832	1	ko03030	Genetic Information Processing	Replication and repair	4176;1810;4171;4175;4172;56655	K02210+K02326+K02540+K02542+K02541+K03506
Phosphatidylinositol signaling system	21	159	0.761571	1	ko04070	Environmental Information Processing	Signal transduction	23533;5330;8760;55784;64419;805;8871;5305;10423;55529;55300;23262;8776;4534;8396;5335;3710;94059;79038;139189;1040	K02649+K05858+K00981+K02677+K18086+K02183+K20279+K00920+K00999+K13084+K13711+K13024+K18081+K01108+K01116+K04960+K19663+K00921+K00901
Protein digestion and absorption	24	181	0.766496	1	ko04974	Organismal Systems	Digestive system	4311;5547;8645;1277;6510;100130705;100170841;1305;1308;1284;1803;170463;1292;1306;8292;8785;1289;220001;1290;51032;84808;1690;3783;84168	K01389+K01285+K04916+K06236+K05616+K19719+K19720+K06237+K16617+K07603+K01278+K06238+K08135+K19721+K01346+K04945
Inositol phosphate metabolism	13	102	0.772276	1	ko00562	Metabolism	Carbohydrate metabolism	5330;64419;8871;5305;10423;55300;8776;4534;8396;5335;79038;9651;57605	K05858+K18086+K20279+K00920+K00999+K13711+K18081+K01108+K01116+K00921+K19006+K00469
N-Glycan biosynthesis	11	90	0.805911	1	ko00510	Metabolism	Glycan biosynthesis and metabolism	2683;283219;11320;130535;6480;29095;90693;401647;2530;1798;200845	K07966+K03849+K00738+K00778+K12667+K00744+K05546+K00717+K01001
Hippo signaling pathway -multiple species	5	44	0.806606	1	ko04392	Environmental Information Processing	Signal transduction	1454;122786;7003;7005;1396	K08960+K16822+K09448+K09851
Vitamin digestion and absorption	4	36	0.806635	1	ko04977	Organismal Systems	Digestive system	55788;6947;81831;2694	K14617+K14615+K14616
Non-alcoholic fatty liver disease (NAFLD)	29	223	0.816627	1	ko04932	Human Diseases	Endocrine and metabolic diseases	3576;3553;23533;9021;7494;4790;3725;3570;7124;1649;7132;637;3552;340527;9451;6720;10018;5562;5571;4729;56946;6391;4709;4728;4712;3569;10000;10062;4704	K10030+K04519+K02649+K04696+K09027+K02580+K04448+K05055+K03156+K04452+K03158+K04726+K04383+K07187+K08860+K07197+K16341+K07198+K07200+K03943+K00236+K03959+K03941+K03962+K05405+K04456+K08536+K03953
Nicotine addiction	6	53	0.822984	1	ko05033	Human Diseases	Substance dependence	4302;773;55011;2905;2562;89832	K05175+K04344+K12302+K05211+K05181+K04809
Proteasome	6	53	0.822984	1	ko03050	Genetic Information Processing	Folding, sorting and degradation	5698;5699;5687;5719;22996;121355	K02741+K02733+K02730+K03039+K02728
Circadian rhythm - fly	1	11	0.831229	1	ko04711	Organismal Systems	Environmental adaptation	1454	K08960
Hypertrophic cardiomyopathy (HCM)	20	160	0.835769	1	ko05410	Human Diseases	Cardiovascular diseases	60;7124;3678;3676;5562;5571;3672;3695;3696;783;8736;9172;782;3569;1636;3679;3675;3693;3690;7042	K05692+K03156+K06484+K06483+K07198+K07200+K06480+K06590+K06591+K04863+K12567+K04862+K05405+K01283+K06583+K06482+K06588+K06493+K13376
Pancreatic secretion	15	123	0.836644	1	ko04972	Organismal Systems	Digestive system	490;493;5330;55784;9545;113;760;115;54855;3710;94059;6558;491;115572;51032	K05850+K05858+K02677+K07884+K08047+K18245+K08049+K05742+K04960+K19663+K10951+K01346
Viral myocarditis	23	183	0.842823	1	ko05416	Human Diseases	Cardiovascular diseases	3383;60;9750;1604;637;3122;3135;5551;54953;6461;2534;3117;79677;391123;445347;3113;3077;3115;959;28969;857;958;941	K06490+K05692+K04006+K04726+K06752+K06751+K07818+K06619+K05703+K17751+K06788+K10785+K03161+K03260+K06278+K03160+K05412
Hedgehog signaling pathway	7	64	0.860659	1	ko04340	Environmental Information Processing	Signal transduction	1454;51684;8643;5567;5727;596;2736	K08960+K06229+K11101+K04345+K06225+K02161+K16798
Phototransduction	6	56	0.861083	1	ko04744	Organismal Systems	Sensory system	805;9187;2780;85012;2779;5148	K02183+K13749+K04631+K13759
RNA polymerase	6	56	0.861083	1	ko03020	Genetic Information Processing	Transcription	283149;221830;5432;10623;84265;80209	K03006+K03004+K03011+K03023+K03024
Regulation of lipolysis in adipocytes	9	80	0.862603	1	ko04923	Organismal Systems	Endocrine system	23533;340527;113;11343;115;154;5567;10000;3991	K02649+K07187+K08047+K01054+K08049+K04142+K04345+K04456+K07188
Apelin signaling pathway	26	209	0.868604	1	ko04371	Environmental Information Processing	Signal transduction	54331;5594;5330;2790;8877;805;7046;3845;113;4088;4208;5562;5571;6199;115;55657;79153;54855;3710;4846;5567;10000;552891;115572;3991;4843	K07826+K04371+K05858+K04545+K04718+K02183+K04674+K07827+K08047+K04500+K04454+K07198+K07200+K04688+K08049+K04961+K05742+K04960+K13242+K04345+K04456+K07188+K13241
Sphingolipid metabolism	10	89	0.873317	1	ko00600	Metabolism	Lipid metabolism	8877;2629;7368;2720;8613;130367;6610;643853;129807;8611	K04718+K01201+K04628+K12309+K01080+K04717+K12351+K12357
Fanconi anemia pathway	10	90	0.881743	1	ko03460	Genetic Information Processing	Replication and repair	100130357;27245;2175;80198;672;55215;80010;84126;2176;2178	K04482+K02350+K10888+K08991+K10605+K10895+K10990+K10905+K10890+K10892
Oxidative phosphorylation	18	152	0.884938	1	ko00190	Metabolism	Energy metabolism	537;8578;528;9296;4729;6391;4709;4728;4712;539;10063;155066;84064;496;84465;1353;4704;245973	K03662+K02258+K02148+K02151+K03943+K00236+K03959+K03941+K03962+K02137+K02260+K02153+K11725+K01543+K03953
Endocrine and other factor-regulated calcium reabsorption	7	67	0.890138	1	ko04961	Organismal Systems	Excretory system	5330;55784;115;94059;5567;8218;56302	K05858+K02677+K08049+K19663+K04345+K04646+K04974
Glycine, serine and threonine metabolism	5	51	0.895742	1	ko00260	Metabolism	Amino acid metabolism	5223;314;23743;669;501	K01834+K00276+K00544+K01837+K14085
Renin secretion	11	100	0.897832	1	ko04924	Organismal Systems	Endocrine system	3759;5330;805;5732;5532;3710;2983;154;5567;1636;5139	K04996+K05858+K02183+K04259+K04348+K04960+K12319+K04142+K04345+K01283+K19021
Nicotinate and nicotinamide metabolism	4	43	0.901744	1	ko00760	Metabolism	Metabolism of cofactors and vitamins	51251;54981;23530;115024	K01081+K10524+K00323
Parkinson's disease	19	163	0.904603	1	ko05012	Human Diseases	Neurodegenerative diseases	135;120892;10105;2314;317;7332;84926;4729;6391;4709;11315;5413;4728;4712;539;5567;7345;6531;4704	K04266+K08844+K09565+K03178+K02084+K04552+K03943+K00236+K03959+K05687+K04557+K03941+K03962+K02137+K04345+K05611+K05036+K03953
Base excision repair	6	61	0.909374	1	ko03410	Genetic Information Processing	Replication and repair	1810;27301;252969;23089;7374;56655	K02326+K10772+K10568+K10798+K03648+K03506
Ubiquitin mediated proteolysis	32	262	0.911011	1	ko04120	Genetic Information Processing	Folding, sorting and degradation	9021;330;4214;867;64397;7428;2314;55294;51191;329;22937;7332;6477;7324;89910;996;51619;8651;51434;140739;672;55008;11059;26259;101059918;4734;1643;653073;4281;23221;8697;84900	K04696+K16060+K04416+K04707+K10260+K03871+K03178+K10615+K04552+K04506+K20217+K10588+K03350+K06689+K04694+K03354+K10687+K10605+K05633+K10264+K10595+K10591+K10140+K08285+K07868+K03355
Ubiquinone and other terpenoid-quinone biosynthesis	1	15	0.911651	1	ko00130	Metabolism	Metabolism of cofactors and vitamins	3242	K00457
Nucleotide excision repair	7	71	0.921117	1	ko03420	Genetic Information Processing	Replication and repair	1022;7508;1810;730394;1643;57507;56655	K02202+K10838+K02326+K03142+K10140+K10847+K03506
Fat digestion and absorption	5	54	0.921422	1	ko04975	Organismal Systems	Digestive system	19;10555;8613;2806;8611	K05641+K13509+K01080+K14455
Neuroactive ligand-receptor interaction	46	369	0.924117	1	ko04080	Environmental Information Processing	Signaling molecules and interaction	135;5724;53829;4302;100130357;3274;286530;719;7067;8698;2150;151;5025;6753;5029;10800;4987;6915;2550;5732;255520;5739;9934;57053;1268;154;3001;84173;1901;81606;3269;2859;339403;5343;57105;887;100133301;2905;1269;2562;89832;5026;3356;2642;2742;2862	K04266+K04279+K08388+K05175+K04264+K04150+K08386+K04009+K05547+K04293+K04234+K04139+K05218+K04219+K04269+K04322+K04216+K04615+K04259+K04263+K04299+K04811+K04277+K04142+K01352+K04288+K04010+K04149+K04276+K08398+K01315+K04323+K04195+K04605+K05211+K04278+K05181+K04809+K05219+K04157+K04583+K05194+K05266
Arachidonic acid metabolism	12	114	0.932859	1	ko00590	Metabolism	Lipid metabolism	240;9536;4048;2878;2687;91227;1549;4056;8605;2053;2877;92086	K00461+K15729+K01254+K00432+K18592+K07418+K00807+K16342+K08726
RNA transport	33	276	0.934179	1	ko03013	Genetic Information Processing	Translation	10318;5903;754;4928;10460;317649;22985;10762;8563;729857;400966;10419;7514;84220;6606;50628;23225;8508;65109;23511;729540;10248;79760;51367;54952;3646;387082;138716;1207;28969;11097;79064;55520	K09291+K12172+K12160+K14297+K14283+K03259+K12875+K14295+K13174+K02516+K14290+K13129+K13132+K14314+K14328+K14311+K14527+K13135+K03537+K13126+K03250+K14525+K05019+K03240+K03260+K14321+K14284+K00784
Fatty acid biosynthesis	1	17	0.936081	1	ko00061	Metabolism	Lipid metabolism	51703	K01897
Dilated cardiomyopathy	19	171	0.939865	1	ko05414	Human Diseases	Cardiovascular diseases	60;7124;3678;113;3676;115;3672;3695;3696;783;5567;8736;9172;782;3679;3675;3693;3690;7042	K05692+K03156+K06484+K08047+K06483+K08049+K06480+K06590+K06591+K04863+K04345+K12567+K04862+K06583+K06482+K06588+K06493+K13376
Glyoxylate and dicarboxylate metabolism	4	48	0.9416	1	ko00630	Metabolism	Carbohydrate metabolism	39;847;8508;5096	K00626+K03781+K19269+K01966
Retinol metabolism	8	83	0.941745	1	ko00830	Metabolism	Metabolism of cofactors and vitamins	51170;10170;54884;216;1548;1549;56603;9249	K15734+K11149+K09516+K07249+K17683+K12664+K11146
alpha-Linolenic acid metabolism	3	39	0.944206	1	ko00592	Metabolism	Lipid metabolism	51;8605;55289	K00232+K16342
Carbohydrate digestion and absorption	7	75	0.944208	1	ko04973	Organismal Systems	Digestive system	23533;3101;93432;197021;10000;2542;6518	K02649+K00844+K12047+K01229+K04456+K08171+K08143
Carbon metabolism	21	191	0.953744	1	ko01200	Metabolism	Global and overview maps	6888;5226;39;847;5223;3101;3030;55902;6391;5160;8277;8508;3417;79746;2026;2027;5096;34;2806;23255;128178	K00616+K00033+K00626+K03781+K01834+K00844+K07515+K01895+K00236+K00161+K00615+K19269+K00031+K07511+K01689+K01966+K00249+K14455
Phototransduction - fly	8	86	0.95486	1	ko04745	Organismal Systems	Sensory system	60;100130357;5330;55784;805;747;815;817	K05692+K08834+K05858+K02677+K02183+K13806+K04515
Transcriptional misregulation in cancer	91	711	0.955531	1	ko05202	Human Diseases	Cancers: Overview	3576;64332;5328;84444;597;5966;7185;604;4790;8013;3398;414236;1026;57532;729993;3684;4299;6667;51274;1649;1027;7048;2313;2210;863;860;401152;2209;472;55063;2308;4208;6257;26032;79811;59338;3065;64083;8148;3087;1436;55184;11179;4221;387338;8543;6692;3560;55204;51513;9856;79680;3695;4066;119392;3487;153768;81543;3738;84072;445347;2119;3002;100532731;3248;4609;7541;4233;3077;23412;4094;150280;3569;1…	K10030+K14242+K01348+K11427+K02162+K09254+K03172+K15618+K02580+K08559+K17693+K06625+K11447+K06461+K15184+K04684+K15605+K04452+K06624+K04388+K09436+K06498+K10053+K09278+K04728+K11424+K07201+K04454+K08525+K05090+K06067+K15620+K14651+K08024+K14970+K15612+K15619+K05069+K03211+K06590+K15604+K10138+K10785+K15593+K01353+K11459+K00069+K04377+K10500+K05099+K11253+K09035+K05405+K06622+K15187+K04182+K03160+…
AMPK signaling pathway	20	185	0.958673	1	ko04152	Environmental Information Processing	Signal transduction	23533;9586;10645;5525;5210;340527;51719;6720;1375;2308;5562;5571;6199;56946;64764;5516;6319;10000;55437;3991	K02649+K09047+K07359+K11584+K19030+K07187+K08272+K07197+K19523+K07201+K07198+K07200+K04688+K09048+K04382+K00507+K04456+K17532+K07188
Proximal tubule bicarbonate reclamation	2	32	0.962663	1	ko04964	Organismal Systems	Excretory system	762;760	K18246+K18245
Type II diabetes mellitus	9	97	0.96335	1	ko04930	Human Diseases	Endocrine and metabolic diseases	23533;9021;5594;7124;340527;3101;8651;79153;773	K02649+K04696+K04371+K03156+K07187+K00844+K04694+K04344
Neomycin, kanamycin and gentamicin biosynthesis	1	21	0.966547	1	ko00524	Metabolism	Biosynthesis of other secondary metabolites	3101	K00844
Maturity onset diabetes of the young	2	33	0.967403	1	ko04950	Human Diseases	Endocrine and metabolic diseases	3087;731220	K08024+K19521
Citrate cycle (TCA cycle)	3	45	0.972881	1	ko00020	Metabolism	Carbohydrate metabolism	6391;5160;3417	K00236+K00161+K00031
Basal transcription factors	5	66	0.976759	1	ko03022	Genetic Information Processing	Transcription	1022;8148;84163;730394;79064	K02202+K14651+K03121+K03142+K03131
Ascorbate and aldarate metabolism	2	36	0.978392	1	ko00053	Metabolism	Carbohydrate metabolism	501;57605	K14085+K00469
Protein export	1	24	0.979417	1	ko03060	Genetic Information Processing	Folding, sorting and degradation	6729	K03106
Drug metabolism - other enzymes	6	78	0.982228	1	ko00983	Metabolism	Xenobiotics biodegradation and metabolism	51733;7172;1806;1548;1549;7083	K01431+K00569+K00207+K17683+K00857
Metabolic pathways	253	1897	0.982363	1	ko01100	Metabolism	Global and overview maps	51582;79888;117289;22856;283149;64333;2683;240;2643;5836;201176;537;8578;6888;5226;5330;3422;6482;8566;8877;4597;8760;51733;39;9663;23761;51703;9536;51;64419;55454;5223;2526;4048;528;3101;8871;5277;9852;84263;2529;9061;79903;221830;54480;9296;1593;2992;11343;4047;23510;1806;10423;84803;2629;22928;6448;8942;79811;314;55300;4144;18;1788;1810;93432;7360;2222;23743;7368;51251;26;23042;5432;83693;1062…	K01581+K13510+K01468+K13499+K03006+K01556+K07966+K00461+K01495+K00688+K03662+K02258+K00616+K00033+K05858+K01823+K00780+K00868+K04718+K01597+K00981+K01431+K00626+K15728+K01613+K01897+K15729+K00232+K18086+K00746+K01834+K07632+K01254+K02148+K00844+K20279+K03857+K13373+K08764+K07635+K13811+K11067+K03004+K03419+K02151+K00488+K00750+K01054+K01852+K01011+K00207+K00999+K13506+K01201+K01008+K01565+K00753+…
Hippo signaling pathway - fly	14	150	0.984319	1	ko04391	Environmental Information Processing	Signal transduction	60;473;7531;1454;6641;9258;5516;51114;4609;376132;7003;7005;1396;85012	K05692+K05628+K06630+K08960+K12076+K16175+K04382+K16675+K04377+K09448+K09851
Metabolism of xenobiotics by cytochrome P450	8	98	0.984781	1	ko00980	Metabolism	Xenobiotics biodegradation and metabolism	1545;218;1572;1646;1548;1645;1549;3290	K07410+K00129+K07416+K00212+K17683+K17685+K15680
Aminoacyl-tRNA biosynthesis	5	70	0.984914	1	ko00970	Genetic Information Processing	Translation	58488;1615;55699;57176;92935	K01866+K01876+K01870+K01873+K01874
Chemical carcinogenesis	8	103	0.990594	1	ko05204	Human Diseases	Cancers: Overview	405;1545;218;1548;1549;883;3290;89832	K09097+K07410+K00129+K17683+K17685+K00816+K15680+K04809
Linoleic acid metabolism	2	43	0.99188	1	ko00591	Metabolism	Lipid metabolism	1549;8605	K07418+K16342
Spliceosome	24	246	0.993772	1	ko03040	Genetic Information Processing	Transcription	3183;3303;3310;6428;22985;2275;221092;25939;10946;388969;6590;9129;9092;3304;11325;9416;50804;3306;151188;57819;151903;6678;25766;84900	K12884+K03283+K12892+K12875+K12827+K12888+K12830+K12900+K12864+K12843+K11984+K12835+K12858+K12887+K12821+K12621+K12871+K12819+K12838
Fructose and mannose metabolism	3	60	0.996	1	ko00051	Metabolism	Carbohydrate metabolism	5210;3101;5373	K19030+K00844+K17497
Huntington's disease	25	274	0.998498	1	ko05016	Human Diseases	Neurodegenerative diseases	6648;9586;359948;283149;10105;6667;5330;317;3065;5432;7052;4729;64764;6391;4709;4728;4712;10126;80209;539;85449;8218;127602;2038;4704	K04564+K09047+K04498+K03006+K09565+K04684+K05858+K02084+K06067+K03011+K05625+K03943+K09048+K00236+K03959+K03941+K03962+K10412+K02137+K04646+K10408+K03953
Pentose and glucuronate interconversions	2	56	0.998749	1	ko00040	Metabolism	Carbohydrate metabolism	7360;10327	K00963+K00002
Drug metabolism - cytochrome P450	4	90	0.999637	1	ko00982	Metabolism	Xenobiotics biodegradation and metabolism	218;1548;1549;2330	K00129+K17683+K00485
Cardiac muscle contraction	5	104	0.999732	1	ko04260	Organismal Systems	Circulatory system	54855;79677;783;782;115572	K05742+K17751+K04863+K04862
mRNA surveillance pathway	22	277	0.999861	1	ko03015	Genetic Information Processing	Translation	7763;5525;22985;5499;55544;54823;5501;10978;25959;23283;53918;65109;149466;100507027;81543;54952;5516;51692;388335;2039;79064;23708	K14404+K11584+K12875+K06269+K14411+K11124+K14399+K14407+K06965+K14328+K14416+K13126+K04382+K14403+K14284+K03267
Porphyrin and chlorophyll metabolism	1	63	0.999963	1	ko00860	Metabolism	Metabolism of cofactors and vitamins	3052	K01764
One carbon pool by folate	1	80	0.999998	1	ko00670	Metabolism	Metabolism of cofactors and vitamins	471	K00602
Pathways in cancer	132	1242	0.999998	1	ko05200	Human Diseases	Cancers: Overview	3576;4792;10318;4791;5900;7852;23533;3091;54331;7185;359948;4790;3725;7422;1955;6776;330;5594;3914;1026;54583;10618;100130357;5330;2790;637;1027;9236;7187;7048;10928;55784;58526;867;9826;7428;7046;863;54682;329;3845;113;5467;324;7039;9618;1495;375387;4088;63901;1399;2308;673;6257;26032;79811;6654;59338;405;3065;6513;9475;1436;55184;84928;25780;11179;100170841;6461;5732;6932;115;4824;51176;56951;7…	K10030+K04734+K09291+K04469+K08732+K04189+K02649+K08268+K07826+K03172+K04498+K02580+K04448+K05448+K06243+K11223+K16060+K04371+K06244+K06625+K09592+K04490+K04482+K05858+K04545+K04726+K06624+K01064+K03174+K04388+K08773+K02677+K04707+K12331+K03871+K04674+K10053+K07827+K08047+K04504+K02085+K08774+K09848+K05691+K01384+K04500+K04438+K07201+K04365+K08525+K05090+K03099+K09097+K06067+K07299+K17388+K12362+…
Proteoglycans in cancer	98	1018	1	1	ko05205	Human Diseases	Cancers: Overview	5328;60;5329;23533;3091;5829;117289;2316;8826;7422;414236;5594;3987;1026;7124;9236;55784;58526;4660;867;3678;767558;5499;54682;3845;375387;2002;63901;348094;5501;673;26032;6654;59338;2549;6714;25959;6199;9475;55184;84928;11179;27076;79153;2615;119392;5335;54855;2335;9649;55691;149466;29923;3710;7057;348793;96626;1839;790955;3738;7855;3593;8293;94059;6385;29102;7041;5567;4609;815;4233;3082;5727;33…	K01348+K05692+K03985+K02649+K08268+K05760+K08007+K04437+K16848+K05448+K04371+K06625+K03156+K01064+K02677+K12329+K04707+K06484+K10380+K06269+K07827+K01384+K04375+K04365+K03099+K09593+K05704+K04688+K17388+K01116+K05742+K05717+K05763+K05762+K04960+K16857+K08523+K02375+K05425+K19663+K16338+K03685+K04345+K04377+K04515+K05099+K05460+K06225+K06255+K05731+K04456+K02842+K07532+K18497+K06588+K06278+K04361+…
Melanogenesis	45	817	1	1	ko04916	Organismal Systems	Endocrine system	359948;5594;10618;5330;9236;1906;55784;58526;805;54682;3845;113;375387;63901;26032;59338;55184;84928;64764;11179;6932;115;51176;56951;79153;2615;119392;1856;149466;29923;348793;790955;3738;7855;8293;94059;83439;5567;815;118471;817;8326;2775;7480;8324	K04498+K04371+K04490+K05858+K01064+K16366+K02677+K02183+K07827+K08047+K01384+K09048+K02620+K08049+K04492+K02353+K02375+K19663+K04345+K04515+K02842+K04534+K01357+K02432
HTLV-I infection	89	1013	1	1	ko05166	Human Diseases	Infectious diseases: Viral	4792;3383;7538;4791;23533;7094;7494;359948;4790;3725;2114;58476;6776;3718;1026;7124;4214;7132;9236;3554;7048;5971;58526;3122;7046;6722;54682;3845;113;4055;324;6416;375387;472;4088;2002;63901;26032;916;7514;59338;1810;6513;3135;55184;84928;996;11179;64784;115;3560;3932;5532;2615;119392;6641;51434;3117;1856;149466;29923;915;348793;4773;4603;790955;3738;7855;8293;445347;5567;4609;3113;3077;3115;3569…	K04734+K06490+K15308+K04469+K02649+K06271+K09027+K04498+K02580+K04448+K02678+K15310+K11223+K11218+K06625+K03156+K04416+K03158+K01064+K04386+K04388+K09253+K06752+K04674+K04378+K07827+K08047+K03159+K02085+K04430+K01384+K04728+K04500+K04375+K06451+K14290+K08065+K02326+K07299+K06751+K03350+K16334+K08049+K05069+K05856+K04348+K12076+K03354+K02353+K06450+K17332+K09421+K02375+K10785+K04345+K04377+K05405+…
Signaling pathways regulating pluripotency of stem cells	60	854	1	1	ko04550	Cellular Processes	Cellular community - eukaryotes	23533;7994;3398;3718;5594;9236;58526;54682;3717;3845;324;9314;375387;4088;63901;55183;26032;10962;9869;59338;55184;84928;91;11179;5013;3976;79153;2615;119392;1856;650;149466;29923;348793;90;790955;3738;7855;8293;3625;100532731;83729;4609;8313;23412;3624;56654;648;118471;10000;53834;8326;2247;3399;3626;130399;4211;7480;8324;10750	K02649+K11305+K17693+K11218+K04371+K01064+K04447+K07827+K02085+K17846+K01384+K04500+K11138+K11421+K13567+K09326+K05419+K02353+K04662+K04675+K02375+K04667+K11459+K04377+K04385+K09367+K04456+K05095+K05094+K02842+K18497+K17694+K13568+K15613+K01357+K02432+K04364
mTOR signaling pathway	64	886	1	1	ko04150	Environmental Information Processing	Signal transduction	23533;6446;8140;5594;7124;7132;9236;55784;58526;9993;317649;6197;528;57600;54682;51719;3845;91355;9296;375387;63901;51256;673;5562;55004;389541;26032;10542;6654;59338;6199;55184;84928;10670;11179;79153;2615;221960;119392;1856;9649;149466;29923;348793;790955;3738;7855;8293;94059;83694;4041;4040;118471;10000;10325;8131;55437;153129;8326;245973;7480;8324;10750;115265	K02649+K13302+K13780+K04371+K03156+K03158+K01064+K02677+K03068+K03259+K04373+K02148+K20401+K08272+K07827+K02151+K01384+K20396+K04365+K07198+K20397+K20399+K16344+K03099+K04688+K16185+K08269+K02353+K02375+K19663+K04456+K20406+K17532+K14995+K02842+K01357+K02432+K04364+K08270
Wnt signaling pathway	65	869	1	1	ko04310	Environmental Information Processing	Signal transduction	359948;3725;23401;5663;10618;5330;9236;55784;58526;91010;9993;54682;10023;5467;324;91355;375387;63901;26032;166;59338;1454;6477;9475;55184;84928;11179;6932;51176;56951;5532;2615;23500;1457;119392;1856;149466;29923;7088;348793;6422;4773;790955;3738;7855;8293;94059;2239;83439;5567;4609;815;8313;114793;25805;4041;4040;118471;817;22943;8326;23002;7089;7480;8324	K04498+K04448+K03096+K04505+K04490+K05858+K01064+K02677+K04512+K03068+K03069+K04504+K02085+K01384+K04497+K08960+K04506+K17388+K02620+K04492+K04348+K03097+K02353+K02166+K17332+K02375+K19663+K08110+K04345+K04377+K04515+K04385+K10162+K02165+K02842+K01357+K02432
Hippo signaling pathway	59	906	1	1	ko04390	Environmental Information Processing	Signal transduction	60;3398;10618;9236;7048;58526;7046;5499;54682;7531;324;1495;375387;4088;63901;5501;7533;26032;59338;1454;25959;55184;84928;10207;4092;11179;6932;51176;56951;2615;119392;6641;122786;1856;650;149466;29923;9258;348793;790955;3738;7855;8293;5516;83439;4609;376132;8313;7003;7005;8200;118471;8326;1741;2736;154796;7480;8324;7042	K05692+K17693+K04490+K01064+K04388+K04674+K06269+K06630+K02085+K05691+K01384+K04500+K16198+K08960+K06092+K19631+K02620+K04492+K12076+K16822+K02353+K04662+K16175+K02375+K04382+K04377+K04385+K09448+K04664+K02842+K12075+K16798+K16819+K01357+K02432+K13376
Breast cancer	65	872	1	1	ko05224	Human Diseases	Cancers: Specific types	4791;23533;3725;23401;5594;1026;10618;6667;9236;58526;9993;54682;3845;10023;324;91355;375387;63901;673;26032;6654;59338;6199;55184;84928;23462;11179;6932;51176;90780;56951;79153;2615;4855;119392;672;1856;9649;149466;29923;348793;790955;3738;7855;8293;1021;2256;83439;28514;4609;8313;4041;4040;54567;118471;10000;8600;57493;8326;2247;1956;4854;7480;8324;10750	K04469+K02649+K04448+K03096+K04371+K06625+K04490+K04684+K01064+K03068+K07827+K03069+K02085+K01384+K04365+K03099+K04688+K09091+K02620+K04492+K06279+K02599+K10605+K02353+K02375+K02091+K04358+K06051+K04377+K04385+K04456+K05473+K02842+K18497+K04361+K01357+K02432+K04364
Basal cell carcinoma	36	729	1	1	ko05217	Human Diseases	Cancers: Specific types	10618;9236;58526;54682;324;375387;63901;26032;59338;55184;84928;11179;6932;51176;56951;2615;119392;51684;1856;650;149466;29923;348793;8643;790955;3738;7855;8293;83439;8313;5727;118471;8326;2736;7480;8324	K04490+K01064+K02085+K01384+K02620+K04492+K06229+K02353+K04662+K11101+K02375+K04385+K06225+K02842+K16798+K01357+K02432
Olfactory transduction	16	510	1	1	ko04740	Organismal Systems	Sensory system	5138;805;119774;390036;127623;5567;26531;815;817;120787;338751;79541;401427;347168;121130;255725	K18283+K02183+K04257+K04345+K04515
Ribosome	27	413	1	1	ko03010	Genetic Information Processing	Translation	10618;79415;23582;401152;374872;51379;80727;9768;6124;220869;3921;6175;254013;10573;6125;4736;6142;6191;64928;442213;445571;79725;6146;81543;63931;64801;140032	K02927+K02923+K02930+K02870+K02998+K02941+K02902+K02932+K02865+K02882+K02987+K02874+K02980+K02891+K02954
Autophagy - animal	62	1081	1	1	ko04140	Cellular Processes	Transport and catabolism	23533;23130;9750;3091;116496;64857;10645;55313;1130;55924;5594;57532;729993;7763;57713;79415;205717;64419;23582;55729;340527;9451;3845;401152;79065;374872;51379;51427;5562;22822;9768;10533;126282;6199;283219;254013;10670;10016;387338;54953;126549;54596;401089;79153;221960;347252;442213;9712;100861412;81543;5516;7851;55765;5567;388335;57732;596;118471;10000;10325;133015;115265	K02649+K17906+K17985+K08268+K07359+K04371+K18086+K07187+K08860+K07827+K17907+K15464+K07198+K08337+K04688+K16185+K08269+K04382+K04345+K17603+K02161+K04456+K08270
RNA degradation	53	1078	1	1	ko03018	Genetic Information Processing	Folding, sorting and degradation	64857;55924;729993;10618;219988;126298;10140;58526;5355;22803;4849;55802;401152;131870;388969;63901;51379;22822;4848;26032;59338;126282;283219;84928;254013;11179;118460;126549;54596;401089;57472;79680;347252;84186;119392;9712;10950;55074;153768;57819;348793;3738;54952;55765;2026;2027;57608;100288801;28960;9652;128178;448831;196513	K12581+K12617+K14443+K12603+K12619+K12580+K12610+K16855+K12605+K12587+K12597+K12621+K13126+K01689+K12584+K12600+K12611
