# Supplementary material for: Abnormal Peripheral Neutrophil Transcriptome in Newly Diagnosed Type 2 Diabetes Patients
Source: J Diabetes Res. 2020 Apr 22;2020:9519072. doi: 10.1155/2020/9519072 (PMC7195634; doi:10.1155/2020/9519072)
Supplement: Supplementary 3 — Supplementary Data 3: upregulated and downregulated gene annotations and identified biological processes in GO analysis. [file 9519072.f3.xlsx]

## Sheet: Annotation-upregulated genes
Input ID	Gene ID	Type	Tax ID	Homologene Gene ID	Homologene Gene Tax ID	Gene Symbol	Description	Biological Process (GO)	Kinase Class (UniProt)	Protein Function (Protein Atlas)	Subcellular Location (Protein Atlas)	Drug (DrugBank)	Canonical Pathways	Hallmark Gene Sets	GO:0002274 myeloid leukocyte activation	GO:0042110 T cell activation	R-HSA-1280218 Adaptive Immune System	GO:0001816 cytokine production	GO:0002683 negative regulation of immune	R-HSA-198933 Immunoregulatory interactions	GO:0002764 immune response-regulating sig	R-HSA-3247509 Chromatin modifying enzymes	GO:0010942 positive regulation of cell de	GO:0019221 cytokine-mediated signaling pa	R-HSA-202433 Generation of second messenger	hsa05202 Transcriptional misregulation	R-HSA-194315 Signaling by Rho GTPases	GO:0032609 interferon-gamma production	GO:0030099 myeloid cell differentiation	GO:0046632 alpha-beta T cell differentiat	GO:0016032 viral process	GO:0051259 protein complex oligomerizatio	hsa04640 Hematopoietic cell lineage	GO:0002820 negative regulation of adaptiv
ACTB	60	symbol	H. sapiens	60	H. sapiens	ACTB	actin beta	GO:0072749 cellular response to cytochalasin B;GO:1901328 response to cytochalasin B;GO:0098974 postsynaptic actin cytoskeleton organization					(M5493)WNT SIGNALING	(M5915)HALLMARK APICAL JUNCTION	0.0	1.0	0.0	0.0	0.0	0.0	1.0	1.0	0.0	0.0	0.0	0.0	1.0	0.0	0.0	0.0	0.0	0.0	0.0	0.0
TXNIP	10628	symbol	H. sapiens	10628	H. sapiens	TXNIP	thioredoxin interacting protein	GO:0071228 cellular response to tumor cell;GO:0051782 negative regulation of cell division;GO:0032570 response to progesterone			Cytosol;Plasma membrane(Approved)			(M5911)HALLMARK INTERFERON ALPHA RESPONSE; (M5902)HALLMARK APOPTOSIS; (M5913)HALLMARK INTERFERON GAMMA RESPONSE	0.0	0.0	0.0	0.0	0.0	0.0	0.0	0.0	1.0	0.0	0.0	0.0	0.0	0.0	0.0	0.0	0.0	0.0	0.0	0.0
CXCR2	3579	symbol	H. sapiens	3579	H. sapiens	CXCR2	C-X-C motif chemokine receptor 2	GO:0033030 negative regulation of neutrophil apoptotic process;GO:0038112 interleukin-8-mediated signaling pathway;GO:0072173 metanephric tubule morphogenesis		CD markers;G-protein coupled receptors/{Chemokines and chemotactic factors receptors,GPCRs excl olfactory receptors}			(M7871)ST GRANULE CELL SURVIVAL PATHWAY; (M210)PID IL8 CXCR2 PATHWAY		1.0	0.0	0.0	1.0	1.0	0.0	0.0	0.0	1.0	1.0	0.0	0.0	0.0	0.0	0.0	0.0	0.0	0.0	0.0	0.0
FCGR3B	2215	symbol	H. sapiens	2215	H. sapiens	FCGR3B	Fc fragment of IgG receptor IIIb	GO:0006501 C-terminal protein lipidation;GO:0043312 neutrophil degranulation;GO:0002283 neutrophil activation involved in immune response		CD markers		Cetuximab;Etanercept;Immune Globulin Human;Adalimumab;Abciximab;Gemtuzumab ozogamicin;Trastuzumab;Rituximab;Basiliximab;Muromonab;Ibritumomab tiuxetan;Tositumomab;Alemtuzumab;Alefacept;Efalizumab;Natalizumab;Palivizumab;Daclizumab;Bevacizumab			1.0	0.0	0.0	0.0	0.0	0.0	0.0	0.0	0.0	0.0	0.0	0.0	0.0	0.0	0.0	0.0	0.0	0.0	0.0	0.0
TUBA1A	7846	symbol	H. sapiens	7846	H. sapiens	TUBA1A	tubulin alpha 1a	GO:0097711 ciliary basal body-plasma membrane docking;GO:0010389 regulation of G2/M transition of mitotic cell cycle;GO:1902749 regulation of cell cycle G2/M phase transition			Microtubules(Enhanced)	Albendazole (Structural molecule activity);Vinblastine (Structural molecule activity);Mebendazole (Structural molecule activity);Epothilone D (Structural molecule activity);Epothilone B (Structural molecule activity);CYT997 (Structural molecule activity);2-MERCAPTO-N-[1,2,3,10-TETRAMETHOXY-9-OXO-5,6,7,9-TETRAHYDRO-BENZO[A]HEPTALEN-7-YL]ACETAMIDE (Structural molecule activity)	(M2579)ST DIFFERENTIATION PATHWAY IN PC12 CELLS; (M19)PID P73PATHWAY		0.0	0.0	1.0	0.0	0.0	0.0	0.0	0.0	0.0	0.0	0.0	0.0	1.0	0.0	0.0	0.0	0.0	0.0	0.0	0.0
MNDA	4332	symbol	H. sapiens	4332	H. sapiens	MNDA	myeloid cell nuclear differentiation antigen	GO:0030889 negative regulation of B cell proliferation;GO:0050869 negative regulation of B cell activation;GO:0050853 B cell receptor signaling pathway			Nucleoli;Nucleoplasm(Supported)				1.0	1.0	0.0	0.0	1.0	0.0	1.0	0.0	1.0	0.0	0.0	0.0	0.0	0.0	0.0	0.0	0.0	0.0	0.0	0.0
SLC2A3	6515	symbol	H. sapiens	6515	H. sapiens	SLC2A3	solute carrier family 2 member 3	GO:0070837 dehydroascorbic acid transport;GO:0019852 L-ascorbic acid metabolic process;GO:0043312 neutrophil degranulation		Transporters/Electrochemical Potential-driven transporters	Plasma membrane(Approved)			(M5947)HALLMARK IL2 STAT5 SIGNALING; (M5924)HALLMARK MTORC1 SIGNALING; (M5891)HALLMARK HYPOXIA	1.0	0.0	0.0	0.0	0.0	0.0	0.0	0.0	0.0	0.0	0.0	0.0	0.0	0.0	0.0	0.0	0.0	0.0	0.0	0.0
SORL1	6653	symbol	H. sapiens	6653	H. sapiens	SORL1	sortilin related receptor 1	GO:1902963 negative regulation of metalloendopeptidase activity involved in amyloid precursor protein catabolic process;GO:1902960 negative regulation of aspartic-type endopeptidase activity involved in amyloid precursor protein catabolic process;GO:1902955 positive regulation of early endosome to recycling endosome transport			Cell Junctions;Nucleoplasm(Approved)				0.0	0.0	0.0	0.0	0.0	0.0	0.0	0.0	1.0	0.0	0.0	0.0	0.0	0.0	0.0	0.0	0.0	1.0	0.0	0.0
ZYX	7791	symbol	H. sapiens	7791	H. sapiens	ZYX	zyxin	GO:0043149 stress fiber assembly;GO:0030038 contractile actin filament bundle assembly;GO:0051017 actin filament bundle assembly			Focal adhesion sites(Supported)		(M184)PID ECADHERIN KERATINOCYTE PATHWAY; (M232)PID ECADHERIN STABILIZATION PATHWAY; (M238)PID THROMBIN PAR1 PATHWAY	(M5915)HALLMARK APICAL JUNCTION	0.0	0.0	0.0	1.0	0.0	0.0	0.0	0.0	0.0	0.0	0.0	0.0	0.0	0.0	0.0	0.0	1.0	0.0	0.0	0.0
CXCR1	3577	symbol	H. sapiens	3577	H. sapiens	CXCR1	C-X-C motif chemokine receptor 1	GO:0038112 interleukin-8-mediated signaling pathway;GO:0098759 cellular response to interleukin-8;GO:0098758 response to interleukin-8		CD markers;G-protein coupled receptors/{Chemokines and chemotactic factors receptors,GPCRs excl olfactory receptors}		Ketoprofen (Interleukin-8 receptor activity)	(M252)PID IL8 CXCR1 PATHWAY		1.0	0.0	0.0	0.0	0.0	0.0	0.0	0.0	0.0	1.0	0.0	0.0	0.0	0.0	0.0	0.0	0.0	0.0	0.0	0.0
SELL	6402	symbol	H. sapiens	6402	H. sapiens	SELL	selectin L	GO:0050901 leukocyte tethering or rolling;GO:0061756 leukocyte adhesion to vascular endothelial cell;GO:0033198 response to ATP		CD markers	Cytosol(Approved)		(M11736)SA MMP CYTOKINE CONNECTION	(M5911)HALLMARK INTERFERON ALPHA RESPONSE; (M5947)HALLMARK IL2 STAT5 SIGNALING; (M5932)HALLMARK INFLAMMATORY RESPONSE	1.0	1.0	1.0	0.0	0.0	1.0	0.0	0.0	0.0	0.0	0.0	0.0	0.0	0.0	0.0	0.0	0.0	0.0	0.0	0.0
MMP25	64386	symbol	H. sapiens	64386	H. sapiens	MMP25	matrix metallopeptidase 25	GO:0060022 hard palate development;GO:0062009 secondary palate development;GO:0043312 neutrophil degranulation		Enzymes/Peptidases/Metallopeptidases		Marimastat (Zinc ion binding)	(M3468)NABA ECM REGULATORS; (M5885)NABA MATRISOME ASSOCIATED; (M5889)NABA MATRISOME		1.0	0.0	0.0	1.0	0.0	0.0	0.0	0.0	0.0	0.0	0.0	0.0	0.0	0.0	0.0	0.0	0.0	0.0	0.0	0.0
VNN2	8875	symbol	H. sapiens	8875	H. sapiens	VNN2	vanin 2	GO:0015939 pantothenate metabolic process;GO:0006501 C-terminal protein lipidation;GO:0018410 C-terminal protein amino acid modification		Enzymes/ENZYME proteins/Hydrolases					0.0	0.0	0.0	0.0	0.0	0.0	0.0	0.0	0.0	0.0	0.0	0.0	0.0	0.0	0.0	0.0	0.0	0.0	0.0	0.0
TNFRSF10C	8794	symbol	H. sapiens	8794	H. sapiens	TNFRSF10C	TNF receptor superfamily member 10c	GO:0043154 negative regulation of cysteine-type endopeptidase activity involved in apoptotic process;GO:2000117 negative regulation of cysteine-type endopeptidase activity;GO:0033209 tumor necrosis factor-mediated signaling pathway		CD markers			(M79)PID TRAIL PATHWAY; (M145)PID P53 DOWNSTREAM PATHWAY		0.0	0.0	0.0	1.0	0.0	0.0	0.0	0.0	1.0	1.0	0.0	0.0	0.0	0.0	0.0	0.0	0.0	0.0	0.0	0.0
MBOAT7	79143	symbol	H. sapiens	79143	H. sapiens	MBOAT7	membrane bound O-acyltransferase domain containing 7	GO:0021819 layer formation in cerebral cortex;GO:0021801 cerebral cortex radial glia guided migration;GO:0021799 cerebral cortex radially oriented cell migration		Enzymes/ENZYME proteins/Transferases	Cytosol(Approved)				0.0	0.0	0.0	0.0	0.0	0.0	0.0	0.0	0.0	0.0	0.0	0.0	0.0	0.0	0.0	0.0	0.0	0.0	0.0	0.0
RNF24	11237	symbol	H. sapiens	11237	H. sapiens	RNF24	ring finger protein 24	GO:0043161 proteasome-mediated ubiquitin-dependent protein catabolic process;GO:0000209 protein polyubiquitination;GO:0006511 ubiquitin-dependent protein catabolic process			Golgi apparatus(Supported)				0.0	0.0	1.0	0.0	0.0	0.0	0.0	0.0	0.0	0.0	0.0	0.0	0.0	0.0	0.0	0.0	0.0	0.0	0.0	0.0
FAM65B	9750	gene_synonym	H. sapiens	9750	H. sapiens	RIPOR2	RHO family interacting cell polarization regulator 2	GO:1903904 negative regulation of establishment of T cell polarity;GO:2000391 positive regulation of neutrophil extravasation;GO:2000405 negative regulation of T cell migration							0.0	1.0	0.0	1.0	1.0	0.0	0.0	0.0	0.0	0.0	0.0	0.0	0.0	0.0	0.0	0.0	0.0	1.0	0.0	0.0
FYB	2533	gene_synonym	H. sapiens	2533	H. sapiens	FYB1	FYN binding protein 1	GO:0006607 NLS-bearing protein import into nucleus;GO:0050852 T cell receptor signaling pathway;GO:0050851 antigen receptor-mediated signaling pathway					(M34)PID TCR PATHWAY	(M5950)HALLMARK ALLOGRAFT REJECTION; (M5915)HALLMARK APICAL JUNCTION	0.0	0.0	1.0	0.0	0.0	0.0	1.0	0.0	0.0	0.0	1.0	0.0	0.0	0.0	0.0	0.0	0.0	0.0	0.0	0.0
CREB5	9586	symbol	H. sapiens	9586	H. sapiens	CREB5	cAMP responsive element binding protein 5	GO:0045893 positive regulation of transcription, DNA-templated;GO:1903508 positive regulation of nucleic acid-templated transcription;GO:1902680 positive regulation of RNA biosynthetic process		Transcription factors/Basic domains	Nucleus;Plasma membrane;Vesicles(Approved)		(M14775)ST G ALPHA S PATHWAY; (M7871)ST GRANULE CELL SURVIVAL PATHWAY; (M4910)ST ERK1 ERK2 MAPK PATHWAY		0.0	0.0	0.0	0.0	0.0	0.0	0.0	0.0	0.0	0.0	0.0	0.0	0.0	0.0	0.0	0.0	0.0	0.0	0.0	0.0
TRIM25	7706	symbol	H. sapiens	7706	H. sapiens	TRIM25	tripartite motif containing 25	GO:1902187 negative regulation of viral release from host cell;GO:0046597 negative regulation of viral entry into host cell;GO:1902186 regulation of viral release from host cell		Enzymes/ENZYME proteins/{Ligase,Transferases}	Cytosol(Supported)Nuclear bodies(Approved)Nucleoplasm(Uncertain)			(M5911)HALLMARK INTERFERON ALPHA RESPONSE; (M5913)HALLMARK INTERFERON GAMMA RESPONSE	0.0	0.0	1.0	1.0	0.0	0.0	0.0	0.0	0.0	1.0	0.0	0.0	0.0	0.0	0.0	0.0	1.0	0.0	0.0	0.0
FAM129A	116496	symbol	H. sapiens	116496	H. sapiens	FAM129A	family with sequence similarity 129 member A	GO:0045727 positive regulation of translation;GO:0001933 negative regulation of protein phosphorylation;GO:0034250 positive regulation of cellular amide metabolic process			Cytosol(Supported)Plasma membrane(Approved)			(M5892)HALLMARK CHOLESTEROL HOMEOSTASIS; (M5924)HALLMARK MTORC1 SIGNALING	0.0	0.0	0.0	0.0	0.0	0.0	0.0	0.0	0.0	0.0	0.0	0.0	0.0	0.0	0.0	0.0	0.0	0.0	0.0	0.0
PXN	5829	symbol	H. sapiens	5829	H. sapiens	PXN	paxillin	GO:0051496 positive regulation of stress fiber assembly;GO:0060396 growth hormone receptor signaling pathway;GO:0051492 regulation of stress fiber assembly			Focal adhesion sites(Enhanced)Cytosol(Supported)Centrosome(Approved)		(M118)PID INTEGRIN A9B1 PATHWAY; (M125)PID IGF1 PATHWAY; (M277)PID INTEGRIN A4B1 PATHWAY	(M5893)HALLMARK MITOTIC SPINDLE	0.0	0.0	0.0	0.0	0.0	0.0	0.0	0.0	0.0	0.0	0.0	0.0	0.0	0.0	0.0	0.0	0.0	0.0	0.0	0.0
CAP1	10487	symbol	H. sapiens	10487	H. sapiens	CAP1	cyclase associated actin cytoskeleton regulatory protein 1	GO:0043312 neutrophil degranulation;GO:0007190 activation of adenylate cyclase activity;GO:0002283 neutrophil activation involved in immune response			Cytosol(Supported)		(M7955)SIG INSULIN RECEPTOR PATHWAY IN CARDIAC MYOCYTES	(M5915)HALLMARK APICAL JUNCTION	1.0	0.0	0.0	0.0	0.0	0.0	0.0	0.0	0.0	0.0	0.0	0.0	0.0	0.0	0.0	0.0	0.0	0.0	0.0	0.0
S100A8	6279	symbol	H. sapiens	6279	H. sapiens	S100A8	S100 calcium binding protein A8	GO:0070488 neutrophil aggregation;GO:0032119 sequestering of zinc ion;GO:0006919 activation of cysteine-type endopeptidase activity involved in apoptotic process			Intermediate filaments(Supported)		(M264)PID TOLL ENDOGENOUS PATHWAY; (M5883)NABA SECRETED FACTORS; (M5885)NABA MATRISOME ASSOCIATED		1.0	1.0	0.0	1.0	0.0	0.0	1.0	0.0	1.0	0.0	0.0	0.0	0.0	0.0	0.0	0.0	0.0	0.0	0.0	0.0
ADGRE5	976	symbol	H. sapiens	976	H. sapiens	ADGRE5	adhesion G protein-coupled receptor E5	GO:0043312 neutrophil degranulation;GO:0002283 neutrophil activation involved in immune response;GO:0042119 neutrophil activation		CD markers;G-protein coupled receptors/{Family 2 (B) receptors,GPCRs excl olfactory receptors};Transporters	Cytosol(Approved)				1.0	0.0	0.0	1.0	0.0	0.0	0.0	0.0	0.0	0.0	0.0	0.0	0.0	0.0	0.0	0.0	0.0	0.0	0.0	0.0
IGF2R	3482	symbol	H. sapiens	3482	H. sapiens	IGF2R	insulin like growth factor 2 receptor	GO:0043312 neutrophil degranulation;GO:0048009 insulin-like growth factor receptor signaling pathway;GO:0002283 neutrophil activation involved in immune response		CD markers	Golgi apparatus;Vesicles(Enhanced)	Mecasermin (Transporter activity);alpha-D-mannose 6-phosphate (Transporter activity)		(M5910)HALLMARK PROTEIN SECRETION; (M5902)HALLMARK APOPTOSIS; (M5947)HALLMARK IL2 STAT5 SIGNALING	1.0	0.0	0.0	0.0	0.0	0.0	0.0	0.0	1.0	0.0	0.0	0.0	0.0	0.0	0.0	0.0	0.0	0.0	0.0	0.0
STK17B	9262	symbol	H. sapiens	9262	H. sapiens	STK17B	serine/threonine kinase 17b	GO:2000271 positive regulation of fibroblast apoptotic process;GO:2000269 regulation of fibroblast apoptotic process;GO:0044346 fibroblast apoptotic process	CAMK Ser/Thr protein kinase family	Enzymes/{ENZYME proteins/Transferases,Kinases/CAMK Ser/Thr protein kinases}	Cytosol;Plasma membrane(Uncertain)	Quercetin (Protein serine/threonine kinase activity)			0.0	0.0	0.0	0.0	0.0	0.0	0.0	0.0	1.0	0.0	0.0	0.0	0.0	0.0	0.0	0.0	0.0	0.0	0.0	0.0
MIDN	90007	symbol	H. sapiens	90007	H. sapiens	MIDN	midnolin	GO:0033132 negative regulation of glucokinase activity;GO:1903300 negative regulation of hexokinase activity;GO:0046676 negative regulation of insulin secretion			Nucleoplasm(Approved)				0.0	0.0	0.0	0.0	0.0	0.0	0.0	0.0	0.0	0.0	0.0	0.0	0.0	0.0	0.0	0.0	0.0	0.0	0.0	0.0
PROK2	60675	symbol	H. sapiens	60675	H. sapiens	PROK2	prokineticin 2	GO:0000187 activation of MAPK activity;GO:0045987 positive regulation of smooth muscle contraction;GO:0007204 positive regulation of cytosolic calcium ion concentration						(M5932)HALLMARK INFLAMMATORY RESPONSE	0.0	0.0	0.0	1.0	0.0	0.0	0.0	0.0	0.0	0.0	0.0	0.0	0.0	0.0	0.0	0.0	0.0	0.0	0.0	0.0
JAML	120425	symbol	H. sapiens	120425	H. sapiens	JAML	junction adhesion molecule like	GO:0072672 neutrophil extravasation;GO:0035696 monocyte extravasation;GO:0060054 positive regulation of epithelial cell proliferation involved in wound healing					(M277)PID INTEGRIN A4B1 PATHWAY		0.0	1.0	1.0	0.0	0.0	1.0	0.0	0.0	0.0	0.0	0.0	0.0	0.0	0.0	0.0	0.0	0.0	0.0	0.0	0.0
PECAM1	5175	symbol	H. sapiens	5175	H. sapiens	PECAM1	platelet and endothelial cell adhesion molecule 1	GO:0072011 glomerular endothelium development;GO:0050904 diapedesis;GO:0072672 neutrophil extravasation					(M53)PID INTEGRIN3 PATHWAY	(M5946)HALLMARK COAGULATION; (M5953)HALLMARK KRAS SIGNALING UP; (M5915)HALLMARK APICAL JUNCTION	1.0	1.0	0.0	0.0	0.0	0.0	0.0	0.0	0.0	0.0	0.0	0.0	0.0	0.0	0.0	0.0	0.0	0.0	0.0	0.0
SELPLG	6404	symbol	H. sapiens	6404	H. sapiens	SELPLG	selectin P ligand	GO:0050902 leukocyte adhesive activation;GO:0046718 viral entry into host cell;GO:0050901 leukocyte tethering or rolling		CD markers			(M159)PID AMB2 NEUTROPHILS PATHWAY		0.0	1.0	0.0	0.0	0.0	0.0	0.0	0.0	0.0	0.0	0.0	0.0	0.0	0.0	0.0	0.0	1.0	0.0	0.0	0.0
BCL6	604	symbol	H. sapiens	604	H. sapiens	BCL6	B cell CLL/lymphoma 6	GO:0048294 negative regulation of isotype switching to IgE isotypes;GO:0045629 negative regulation of T-helper 2 cell differentiation;GO:0045829 negative regulation of isotype switching		Transcription factors/Zinc-coordinating DNA-binding domains	Nucleoplasm(Enhanced)Golgi apparatus(Uncertain)		(M30)PID HDAC CLASSII PATHWAY; (M136)PID FOXO PATHWAY; (M28)PID IL4 2PATHWAY	(M5905)HALLMARK ADIPOGENESIS; (M5890)HALLMARK TNFA SIGNALING VIA NFKB	1.0	1.0	0.0	1.0	1.0	0.0	0.0	1.0	1.0	1.0	0.0	1.0	0.0	0.0	1.0	1.0	0.0	0.0	0.0	1.0
S100A11	6282	symbol	H. sapiens	6282	H. sapiens	S100A11	S100 calcium binding protein A11	GO:0043312 neutrophil degranulation;GO:0008156 negative regulation of DNA replication;GO:0002283 neutrophil activation involved in immune response				Phosphonothreonine (S100 protein binding)	(M5883)NABA SECRETED FACTORS; (M5885)NABA MATRISOME ASSOCIATED; (M5889)NABA MATRISOME	(M5892)HALLMARK CHOLESTEROL HOMEOSTASIS	1.0	1.0	0.0	0.0	0.0	0.0	0.0	0.0	0.0	0.0	0.0	0.0	0.0	0.0	0.0	0.0	0.0	0.0	0.0	0.0
FLOT2	2319	symbol	H. sapiens	2319	H. sapiens	FLOT2	flotillin 2	GO:0034139 regulation of toll-like receptor 3 signaling pathway;GO:1903905 positive regulation of establishment of T cell polarity;GO:0034138 toll-like receptor 3 signaling pathway					(M1315)SIG PIP3 SIGNALING IN B LYMPHOCYTES; (M8626)SIG BCR SIGNALING PATHWAY; (M7955)SIG INSULIN RECEPTOR PATHWAY IN CARDIAC MYOCYTES	(M5916)HALLMARK APICAL SURFACE	0.0	1.0	0.0	1.0	0.0	0.0	1.0	0.0	0.0	0.0	0.0	0.0	0.0	0.0	0.0	0.0	0.0	0.0	0.0	0.0
SOCS3	9021	symbol	H. sapiens	9021	H. sapiens	SOCS3	suppressor of cytokine signaling 3	GO:0060708 spongiotrophoblast differentiation;GO:0060670 branching involved in labyrinthine layer morphogenesis;GO:0046627 negative regulation of insulin receptor signaling pathway			Cytosol(Approved)		(M233)PID EPO PATHWAY; (M196)PID IL23 PATHWAY; (M183)PID IL6 7 PATHWAY	(M5897)HALLMARK IL6 JAK STAT3 SIGNALING; (M5913)HALLMARK INTERFERON GAMMA RESPONSE; (M5890)HALLMARK TNFA SIGNALING VIA NFKB	0.0	0.0	1.0	1.0	0.0	0.0	0.0	0.0	0.0	1.0	0.0	0.0	0.0	0.0	0.0	0.0	0.0	0.0	0.0	0.0
TUBA1B	10376	symbol	H. sapiens	10376	H. sapiens	TUBA1B	tubulin alpha 1b	GO:0071353 cellular response to interleukin-4;GO:0070670 response to interleukin-4;GO:0030705 cytoskeleton-dependent intracellular transport			Microtubules(Supported)	Epothilone D (Ubiquitin protein ligase binding);Epothilone B (Ubiquitin protein ligase binding);CYT997 (Ubiquitin protein ligase binding);2-MERCAPTO-N-[1,2,3,10-TETRAMETHOXY-9-OXO-5,6,7,9-TETRAHYDRO-BENZO[A]HEPTALEN-7-YL]ACETAMIDE (Ubiquitin protein ligase binding)	(M11)PID PRL SIGNALING EVENTS PATHWAY; (M32)PID HDAC CLASSIII PATHWAY; (M30)PID HDAC CLASSII PATHWAY		0.0	0.0	1.0	0.0	0.0	0.0	0.0	0.0	0.0	0.0	0.0	0.0	1.0	0.0	0.0	0.0	0.0	0.0	0.0	0.0
PHC2	1912	symbol	H. sapiens	1912	H. sapiens	PHC2	polyhomeotic homolog 2	GO:0007283 spermatogenesis;GO:0048232 male gamete generation;GO:0007276 gamete generation			Nucleoplasm(Supported)				0.0	0.0	0.0	0.0	0.0	0.0	0.0	0.0	0.0	0.0	0.0	0.0	1.0	0.0	0.0	0.0	0.0	0.0	0.0	0.0
LRP10	26020	symbol	H. sapiens	26020	H. sapiens	LRP10	LDL receptor related protein 10	GO:0048839 inner ear development;GO:0006898 receptor-mediated endocytosis;GO:0043583 ear development			Nucleoli;Nucleus(Approved)			(M5945)HALLMARK HEME METABOLISM	0.0	0.0	0.0	0.0	0.0	0.0	0.0	0.0	0.0	0.0	0.0	0.0	0.0	0.0	0.0	0.0	0.0	0.0	0.0	0.0
TLN1	7094	symbol	H. sapiens	7094	H. sapiens	TLN1	talin 1	GO:0036498 IRE1-mediated unfolded protein response;GO:0007016 cytoskeletal anchoring at plasma membrane;GO:0070527 platelet aggregation			Cytosol;Focal adhesion sites;Microtubule organizing center;Plasma membrane(Supported)		(M72)PID NECTIN PATHWAY; (M277)PID INTEGRIN A4B1 PATHWAY; (M127)PID ERBB1 RECEPTOR PROXIMAL PATHWAY		1.0	1.0	0.0	0.0	0.0	0.0	0.0	0.0	0.0	0.0	0.0	0.0	0.0	0.0	0.0	0.0	1.0	0.0	0.0	0.0
WIPF1	7456	symbol	H. sapiens	7456	H. sapiens	WIPF1	WAS/WASL interacting protein family member 1	GO:0038096 Fc-gamma receptor signaling pathway involved in phagocytosis;GO:0002431 Fc receptor mediated stimulatory signaling pathway;GO:0038094 Fc-gamma receptor signaling pathway			Cytosol;Plasma membrane(Approved)		(M7)PID FCER1 PATHWAY	(M5930)HALLMARK EPITHELIAL MESENCHYMAL TRANSITION	0.0	0.0	0.0	0.0	0.0	0.0	1.0	0.0	0.0	0.0	0.0	0.0	1.0	0.0	0.0	0.0	0.0	0.0	0.0	0.0
IQGAP1	8826	symbol	H. sapiens	8826	H. sapiens	IQGAP1	IQ motif containing GTPase activating protein 1	GO:0072015 glomerular visceral epithelial cell development;GO:0072310 glomerular epithelial cell development;GO:0072112 glomerular visceral epithelial cell differentiation			Cell Junctions;Plasma membrane(Supported)		(M163)PID LIS1 PATHWAY; (M72)PID NECTIN PATHWAY; (M156)PID ECADHERIN NASCENT AJ PATHWAY		1.0	1.0	0.0	1.0	0.0	0.0	0.0	0.0	1.0	0.0	0.0	0.0	1.0	0.0	0.0	0.0	0.0	0.0	0.0	0.0
IL17RA	23765	symbol	H. sapiens	23765	H. sapiens	IL17RA	interleukin 17 receptor A	GO:2000667 positive regulation of interleukin-13 secretion;GO:2000664 positive regulation of interleukin-5 secretion;GO:2000662 regulation of interleukin-5 secretion		CD markers	Cytosol;Nucleoplasm(Approved)			(M5897)HALLMARK IL6 JAK STAT3 SIGNALING	0.0	0.0	0.0	1.0	0.0	0.0	0.0	0.0	0.0	1.0	0.0	0.0	0.0	0.0	0.0	0.0	0.0	0.0	0.0	0.0
RNF149	284996	symbol	H. sapiens	284996	H. sapiens	RNF149	ring finger protein 149	GO:0043409 negative regulation of MAPK cascade;GO:0001933 negative regulation of protein phosphorylation;GO:0042326 negative regulation of phosphorylation		Enzymes/ENZYME proteins/Transferases	Plasma membrane;Vesicles(Approved)				0.0	0.0	1.0	0.0	0.0	0.0	0.0	0.0	0.0	0.0	0.0	0.0	0.0	0.0	0.0	0.0	0.0	0.0	0.0	0.0
CHSY1	22856	symbol	H. sapiens	22856	H. sapiens	CHSY1	chondroitin sulfate synthase 1	GO:0030206 chondroitin sulfate biosynthetic process;GO:0002063 chondrocyte development;GO:0050650 chondroitin sulfate proteoglycan biosynthetic process		Enzymes/ENZYME proteins/Transferases					0.0	0.0	0.0	0.0	0.0	0.0	0.0	0.0	0.0	0.0	0.0	0.0	0.0	0.0	0.0	0.0	0.0	0.0	0.0	0.0
PADI2	11240	symbol	H. sapiens	11240	H. sapiens	PADI2	peptidyl arginine deiminase 2	GO:1901624 negative regulation of lymphocyte chemotaxis;GO:0036413 histone H3-R26 citrullination;GO:0010848 regulation of chromatin disassembly		Enzymes/ENZYME proteins/Hydrolases		L-Citrulline (Protein-arginine deiminase activity)			1.0	0.0	0.0	1.0	1.0	0.0	0.0	1.0	0.0	1.0	0.0	0.0	0.0	0.0	0.0	0.0	0.0	0.0	0.0	0.0
MME	4311	symbol	H. sapiens	4311	H. sapiens	MME	membrane metalloendopeptidase	GO:0002003 angiotensin maturation;GO:0002002 regulation of angiotensin levels in blood;GO:0001991 regulation of systemic arterial blood pressure by circulatory renin-angiotensin		CD markers;Enzymes/{ENZYME proteins/Hydrolases,Peptidases/Metallopeptidases}		Candoxatril (Zinc ion binding);Omapatrilat (Zinc ion binding);N-[3-[(1-Aminoethyl)(Hydroxy)Phosphoryl]-2-(1,1'-Biphenyl-4-Ylmethyl)Propanoyl]Alanine (Zinc ion binding);Phosphoramidon (Zinc ion binding);N-(3-Phenyl-2-Sulfanylpropanoyl)Phenylalanylalanine (Zinc ion binding);[2(R,S)-2-Sulfanylheptanoyl]-Phe-Ala (Zinc ion binding);SLV 306 (Zinc ion binding);2-[(1S)-1-BENZYL-2-SULFANYLETHYL]-1H-IMIDAZ…			1.0	0.0	0.0	0.0	0.0	0.0	0.0	0.0	0.0	0.0	0.0	0.0	0.0	0.0	0.0	0.0	0.0	0.0	1.0	0.0
CORO1A	11151	symbol	H. sapiens	11151	H. sapiens	CORO1A	coronin 1A	GO:0051126 negative regulation of actin nucleation;GO:0051279 regulation of release of sequestered calcium ion into cytosol;GO:0051209 release of sequestered calcium ion into cytosol			Cytosol(Approved)			(M5924)HALLMARK MTORC1 SIGNALING	1.0	1.0	0.0	0.0	0.0	0.0	0.0	0.0	0.0	0.0	0.0	0.0	0.0	0.0	0.0	1.0	0.0	0.0	0.0	1.0
LRRK2	120892	symbol	H. sapiens	120892	H. sapiens	LRRK2	leucine rich repeat kinase 2	GO:1903217 negative regulation of protein processing involved in protein targeting to mitochondrion;GO:1903125 negative regulation of thioredoxin peroxidase activity by peptidyl-threonine phosphorylation;GO:1903216 regulation of protein processing involved in protein targeting to mitochondrion	TKL Ser/Thr protein kinase family	Enzymes/{ENZYME proteins/Transferases,Kinases/TKL Ser/Thr protein kinases}	Nucleus;Vesicles(Approved)				1.0	1.0	1.0	1.0	0.0	0.0	0.0	1.0	1.0	0.0	0.0	0.0	0.0	0.0	0.0	0.0	0.0	0.0	0.0	0.0
FGL2	10875	symbol	H. sapiens	10875	H. sapiens	FGL2	fibrinogen like 2	GO:0043312 neutrophil degranulation;GO:0002283 neutrophil activation involved in immune response;GO:0042119 neutrophil activation					(M3008)NABA ECM GLYCOPROTEINS; (M5884)NABA CORE MATRISOME; (M5889)NABA MATRISOME	(M5913)HALLMARK INTERFERON GAMMA RESPONSE; (M5947)HALLMARK IL2 STAT5 SIGNALING; (M5924)HALLMARK MTORC1 SIGNALING	1.0	0.0	0.0	0.0	0.0	0.0	0.0	0.0	0.0	0.0	0.0	0.0	0.0	0.0	0.0	0.0	0.0	0.0	0.0	0.0
GCA	25801	symbol	H. sapiens	25801	H. sapiens	GCA	grancalcin	GO:0043312 neutrophil degranulation;GO:0002283 neutrophil activation involved in immune response;GO:0042119 neutrophil activation			Cytosol(Supported)Plasma membrane(Approved)			(M5921)HALLMARK COMPLEMENT	1.0	0.0	0.0	0.0	0.0	0.0	0.0	0.0	0.0	0.0	0.0	0.0	0.0	0.0	0.0	0.0	0.0	0.0	0.0	0.0
SLC44A2	57153	symbol	H. sapiens	57153	H. sapiens	SLC44A2	solute carrier family 44 member 2	GO:0015871 choline transport;GO:0006656 phosphatidylcholine biosynthetic process;GO:0043312 neutrophil degranulation		Transporters/Electrochemical Potential-driven transporters	Cell Junctions;Vesicles(Approved)				1.0	0.0	0.0	0.0	0.0	0.0	0.0	0.0	0.0	0.0	0.0	0.0	0.0	0.0	0.0	0.0	0.0	0.0	0.0	0.0
P2RY13	53829	symbol	H. sapiens	53829	H. sapiens	P2RY13	purinergic receptor P2Y13	GO:0007194 negative regulation of adenylate cyclase activity;GO:0030818 negative regulation of cAMP biosynthetic process;GO:0045761 regulation of adenylate cyclase activity		G-protein coupled receptors/{Adenosine and adenine nucleotide receptors,GPCRs excl olfactory receptors}					0.0	0.0	0.0	0.0	0.0	0.0	0.0	0.0	0.0	0.0	0.0	0.0	0.0	0.0	0.0	0.0	0.0	0.0	0.0	0.0
CELF2	10659	symbol	H. sapiens	10659	H. sapiens	CELF2	CUGBP Elav-like family member 2	GO:0006376 mRNA splice site selection;GO:0000245 spliceosomal complex assembly;GO:0008016 regulation of heart contraction			Cytokinetic bridge;Microtubules;Nucleoplasm(Uncertain)			(M5942)HALLMARK UV RESPONSE DN	0.0	0.0	0.0	0.0	0.0	0.0	0.0	0.0	0.0	0.0	0.0	0.0	0.0	0.0	0.0	0.0	0.0	0.0	0.0	0.0
APBB1IP	54518	symbol	H. sapiens	54518	H. sapiens	APBB1IP	amyloid beta precursor protein binding family B member 1 interacting protein	GO:0002291 T cell activation via T cell receptor contact with antigen bound to MHC molecule on antigen presenting cell;GO:0002286 T cell activation involved in immune response;GO:0002285 lymphocyte activation involved in immune response			Cytosol;Plasma membrane(Enhanced)				1.0	1.0	0.0	0.0	0.0	0.0	0.0	0.0	0.0	0.0	0.0	0.0	0.0	0.0	0.0	1.0	0.0	0.0	0.0	0.0
FBXL5	26234	symbol	H. sapiens	26234	H. sapiens	FBXL5	F-box and leucine rich repeat protein 5	GO:0031146 SCF-dependent proteasomal ubiquitin-dependent protein catabolic process;GO:0006879 cellular iron ion homeostasis;GO:0055072 iron ion homeostasis							0.0	0.0	1.0	0.0	0.0	0.0	0.0	0.0	0.0	0.0	0.0	0.0	0.0	0.0	0.0	0.0	0.0	0.0	0.0	0.0
STEAP4	79689	symbol	H. sapiens	79689	H. sapiens	STEAP4	STEAP4 metalloreductase	GO:0098706 ferric iron import across plasma membrane;GO:0033216 ferric iron import;GO:0098711 iron ion import across plasma membrane		Transporters/Transport Electron Carriers	Golgi apparatus(Supported)			(M5908)HALLMARK ANDROGEN RESPONSE	0.0	0.0	0.0	0.0	0.0	0.0	0.0	0.0	0.0	0.0	0.0	0.0	0.0	0.0	0.0	0.0	0.0	0.0	0.0	0.0
MEGF9	1955	symbol	H. sapiens	1955	H. sapiens	MEGF9	multiple EGF like domains 9	GO:0008150 biological_process			Cytosol;Nucleus(Approved)		(M5883)NABA SECRETED FACTORS; (M5885)NABA MATRISOME ASSOCIATED; (M5889)NABA MATRISOME		0.0	0.0	0.0	0.0	0.0	0.0	0.0	0.0	0.0	0.0	0.0	0.0	0.0	0.0	0.0	0.0	0.0	0.0	0.0	0.0
LILRB2	10288	symbol	H. sapiens	10288	H. sapiens	LILRB2	leukocyte immunoglobulin like receptor B2	GO:1905875 negative regulation of postsynaptic density organization;GO:1900454 positive regulation of long term synaptic depression;GO:0002774 Fc receptor mediated inhibitory signaling pathway		CD markers					1.0	1.0	0.0	1.0	1.0	0.0	1.0	0.0	0.0	0.0	0.0	0.0	0.0	0.0	0.0	0.0	0.0	0.0	0.0	1.0
DYSF	8291	symbol	H. sapiens	8291	H. sapiens	DYSF	dysferlin	GO:0001778 plasma membrane repair;GO:0007009 plasma membrane organization;GO:0006906 vesicle fusion		Transporters/Transporter channels and pores	Plasma membrane(Supported)Microtubule organizing center(Approved)				0.0	0.0	0.0	0.0	0.0	0.0	0.0	0.0	0.0	0.0	0.0	0.0	0.0	0.0	0.0	0.0	0.0	0.0	0.0	0.0
KAT6A	7994	symbol	H. sapiens	7994	H. sapiens	KAT6A	lysine acetyltransferase 6A	GO:0043966 histone H3 acetylation;GO:0090398 cellular senescence;GO:0016573 histone acetylation		Enzymes/ENZYME proteins/Transferases;Transcription factors/Zinc-coordinating DNA-binding domains	Cytosol;Nuclear speckles;Nucleoli(Approved)				0.0	0.0	0.0	0.0	0.0	0.0	0.0	1.0	0.0	0.0	0.0	0.0	0.0	0.0	1.0	0.0	0.0	0.0	0.0	0.0
ARHGAP9	64333	symbol	H. sapiens	64333	H. sapiens	ARHGAP9	Rho GTPase activating protein 9	GO:0043312 neutrophil degranulation;GO:0002283 neutrophil activation involved in immune response;GO:0042119 neutrophil activation					(M241)PID RAC1 REG PATHWAY; (M68)PID RHOA REG PATHWAY		1.0	0.0	0.0	0.0	0.0	0.0	0.0	0.0	1.0	0.0	0.0	0.0	1.0	0.0	0.0	0.0	0.0	0.0	0.0	0.0
PPP1R3B	79660	symbol	H. sapiens	79660	H. sapiens	PPP1R3B	protein phosphatase 1 regulatory subunit 3B	GO:0005981 regulation of glycogen catabolic process;GO:0005979 regulation of glycogen biosynthetic process;GO:0005980 glycogen catabolic process			Cytosol(Approved)				0.0	0.0	0.0	0.0	0.0	0.0	0.0	0.0	0.0	0.0	0.0	0.0	0.0	0.0	0.0	0.0	0.0	0.0	0.0	0.0
PICALM	8301	symbol	H. sapiens	8301	H. sapiens	PICALM	phosphatidylinositol binding clathrin assembly protein	GO:1902963 negative regulation of metalloendopeptidase activity involved in amyloid precursor protein catabolic process;GO:1902962 regulation of metalloendopeptidase activity involved in amyloid precursor protein catabolic process;GO:1902961 positive regulation of aspartic-type endopeptidase activity involved in amyloid precursor protein catabolic process			Vesicles(Supported)			(M5945)HALLMARK HEME METABOLISM	0.0	0.0	0.0	0.0	0.0	0.0	0.0	0.0	1.0	0.0	0.0	0.0	0.0	0.0	0.0	0.0	0.0	0.0	0.0	0.0
ALOX5	240	symbol	H. sapiens	240	H. sapiens	ALOX5	arachidonate 5-lipoxygenase	GO:2001301 lipoxin biosynthetic process;GO:0002540 leukotriene production involved in inflammatory response;GO:2001300 lipoxin metabolic process		Enzymes/ENZYME proteins/Oxidoreductases	Nucleoplasm(Supported)	Vitamin E (Iron ion binding);Masoprocol (Iron ion binding);Aminosalicylic Acid (Iron ion binding);Mesalazine (Iron ion binding);Montelukast (Iron ion binding);Diclofenac (Iron ion binding);Diethylcarbamazine (Iron ion binding);Zileuton (Iron ion binding);Sulfasalazine (Iron ion binding);Meclofenamic acid (Iron ion binding);Balsalazide (Iron ion binding);Minocycline (Iron ion binding);Hyperforin (…			1.0	0.0	0.0	1.0	0.0	0.0	0.0	0.0	0.0	1.0	0.0	0.0	0.0	0.0	0.0	0.0	0.0	0.0	0.0	0.0
CR1	1378	symbol	H. sapiens	1378	H. sapiens	CR1	complement C3b/C4b receptor 1 (Knops blood group)	GO:0045959 negative regulation of complement activation, classical pathway;GO:0045957 negative regulation of complement activation, alternative pathway;GO:0030450 regulation of complement activation, classical pathway		Blood group antigen proteins;CD markers				(M5921)HALLMARK COMPLEMENT	1.0	1.0	0.0	1.0	1.0	0.0	1.0	0.0	1.0	0.0	0.0	0.0	0.0	0.0	0.0	0.0	1.0	0.0	1.0	1.0
ADGRE2	30817	symbol	H. sapiens	30817	H. sapiens	ADGRE2	adhesion G protein-coupled receptor E2	GO:0043304 regulation of mast cell degranulation;GO:0033006 regulation of mast cell activation involved in immune response;GO:0043303 mast cell degranulation		CD markers;G-protein coupled receptors/{Family 2 (B) receptors,GPCRs excl olfactory receptors}	Vesicles(Approved)				1.0	1.0	0.0	1.0	0.0	0.0	0.0	0.0	0.0	0.0	0.0	0.0	0.0	0.0	0.0	0.0	0.0	0.0	0.0	1.0
TLR1	7096	symbol	H. sapiens	7096	H. sapiens	TLR1	toll like receptor 1	GO:0034137 positive regulation of toll-like receptor 2 signaling pathway;GO:0042495 detection of triacyl bacterial lipopeptide;GO:0034130 toll-like receptor 1 signaling pathway		CD markers			(M264)PID TOLL ENDOGENOUS PATHWAY	(M5950)HALLMARK ALLOGRAFT REJECTION; (M5932)HALLMARK INFLAMMATORY RESPONSE	1.0	0.0	1.0	1.0	0.0	0.0	1.0	0.0	0.0	0.0	0.0	0.0	0.0	0.0	0.0	0.0	0.0	0.0	0.0	0.0
ACTN1	87	symbol	H. sapiens	87	H. sapiens	ACTN1	actinin alpha 1	GO:0030220 platelet formation;GO:0048041 focal adhesion assembly;GO:0051639 actin filament network formation			Focal adhesion sites;Plasma membrane(Approved)		(M165)PID SYNDECAN 4 PATHWAY; (M232)PID ECADHERIN STABILIZATION PATHWAY; (M71)PID ILK PATHWAY	(M5908)HALLMARK ANDROGEN RESPONSE; (M5915)HALLMARK APICAL JUNCTION	1.0	1.0	0.0	0.0	0.0	0.0	0.0	0.0	0.0	0.0	0.0	0.0	0.0	0.0	1.0	0.0	0.0	0.0	0.0	0.0
MSL1	339287	symbol	H. sapiens	339287	H. sapiens	MSL1	male specific lethal 1 homolog	GO:0043984 histone H4-K16 acetylation;GO:0043967 histone H4 acetylation;GO:0016573 histone acetylation			Nucleoplasm(Enhanced)				0.0	0.0	0.0	0.0	0.0	0.0	0.0	1.0	0.0	0.0	0.0	0.0	0.0	0.0	0.0	0.0	0.0	0.0	0.0	0.0
MSRB1	51734	symbol	H. sapiens	51734	H. sapiens	MSRB1	methionine sulfoxide reductase B1	GO:0030091 protein repair;GO:0030041 actin filament polymerization;GO:0008154 actin polymerization or depolymerization			Nucleoplasm(Enhanced)			(M5921)HALLMARK COMPLEMENT	0.0	0.0	0.0	0.0	0.0	0.0	0.0	0.0	0.0	0.0	0.0	0.0	0.0	0.0	0.0	0.0	0.0	0.0	0.0	0.0
RERE	473	symbol	H. sapiens	473	H. sapiens	RERE	arginine-glutamic acid dipeptide repeats	GO:0021691 cerebellar Purkinje cell layer maturation;GO:0021699 cerebellar cortex maturation;GO:0021590 cerebellum maturation		Transcription factors/{Helix-turn-helix domains,Zinc-coordinating DNA-binding domains}					0.0	0.0	0.0	0.0	0.0	0.0	0.0	1.0	0.0	0.0	0.0	0.0	0.0	0.0	0.0	0.0	0.0	0.0	0.0	0.0
FAM53C	51307	symbol	H. sapiens	51307	H. sapiens	FAM53C	family with sequence similarity 53 member C								0.0	0.0	0.0	0.0	0.0	0.0	0.0	0.0	0.0	0.0	0.0	0.0	0.0	0.0	0.0	0.0	0.0	0.0	0.0	0.0
CPPED1	55313	symbol	H. sapiens	55313	H. sapiens	CPPED1	calcineurin like phosphoesterase domain containing 1	GO:0043312 neutrophil degranulation;GO:0002283 neutrophil activation involved in immune response;GO:0042119 neutrophil activation		Enzymes/ENZYME proteins/Hydrolases	Cytosol;Plasma membrane(Supported)				1.0	0.0	0.0	0.0	0.0	0.0	0.0	0.0	0.0	0.0	0.0	0.0	0.0	0.0	0.0	0.0	0.0	0.0	0.0	0.0
DUSP6	1848	symbol	H. sapiens	1848	H. sapiens	DUSP6	dual specificity phosphatase 6	GO:0042663 regulation of endodermal cell fate specification;GO:0000188 inactivation of MAPK activity;GO:0001714 endodermal cell fate specification		Enzymes/ENZYME proteins/Hydrolases	Cytosol(Supported)Nucleoplasm(Uncertain)		(M4910)ST ERK1 ERK2 MAPK PATHWAY; (M164)PID ERBB1 DOWNSTREAM PATHWAY	(M5946)HALLMARK COAGULATION; (M5953)HALLMARK KRAS SIGNALING UP; (M5921)HALLMARK COMPLEMENT	0.0	0.0	0.0	0.0	0.0	0.0	0.0	0.0	1.0	1.0	0.0	1.0	0.0	0.0	0.0	0.0	0.0	0.0	0.0	0.0
VMP1	81671	symbol	H. sapiens	81671	H. sapiens	VMP1	vacuole membrane protein 1	GO:0007566 embryo implantation;GO:0007029 endoplasmic reticulum organization;GO:0007565 female pregnancy			Endoplasmic reticulum(Supported)Nucleoli(Approved)				0.0	1.0	0.0	0.0	0.0	0.0	0.0	0.0	0.0	0.0	0.0	0.0	0.0	0.0	0.0	0.0	0.0	0.0	0.0	0.0
FCGR3A	2214	symbol	H. sapiens	2214	H. sapiens	FCGR3A	Fc fragment of IgG receptor IIIa	GO:0038096 Fc-gamma receptor signaling pathway involved in phagocytosis;GO:0002431 Fc receptor mediated stimulatory signaling pathway;GO:0038094 Fc-gamma receptor signaling pathway		CD markers		Cetuximab;Etanercept;Immune Globulin Human;Adalimumab;Abciximab;Gemtuzumab ozogamicin;Trastuzumab;Rituximab;Basiliximab;Muromonab;Ibritumomab tiuxetan;Tositumomab;Alemtuzumab;Alefacept;Efalizumab;Natalizumab;Palivizumab;Daclizumab;Bevacizumab	(M11736)SA MMP CYTOKINE CONNECTION		0.0	0.0	1.0	0.0	0.0	1.0	1.0	0.0	0.0	0.0	0.0	0.0	0.0	0.0	0.0	0.0	0.0	0.0	0.0	0.0
PYGL	5836	symbol	H. sapiens	5836	H. sapiens	PYGL	glycogen phosphorylase L	GO:0006015 5-phosphoribose 1-diphosphate biosynthetic process;GO:0046391 5-phosphoribose 1-diphosphate metabolic process;GO:0005980 glycogen catabolic process		Enzymes/ENZYME proteins/Transferases	Cytosol;Plasma membrane(Supported)	Pyridoxal Phosphate (Vitamin binding);Adenosine monophosphate (Vitamin binding);CP-526423 (Vitamin binding);1-N-Acetyl-Beta-D-Glucosamine (Vitamin binding);Beta-D-Glucose (Vitamin binding);5-Chloro-1h-Indole-2-Carboxylic Acid{[Cyclopentyl-(2-Hydroxy-Ethyl)-Carbamoyl]-Methyl}-Amide (Vitamin binding);Cp403700, (S)-1-{2-[(5-Chloro-1h-Indole-2-Carbonyl)-Amino]-3-Phenyl-Propionyl}-Azetidine-3-Carboxyl…		(M5937)HALLMARK GLYCOLYSIS	1.0	0.0	0.0	0.0	0.0	0.0	0.0	0.0	0.0	0.0	0.0	0.0	0.0	0.0	0.0	0.0	0.0	0.0	0.0	0.0
LILRB3	11025	symbol	H. sapiens	11025	H. sapiens	LILRB3	leukocyte immunoglobulin like receptor B3	GO:0045671 negative regulation of osteoclast differentiation;GO:0002762 negative regulation of myeloid leukocyte differentiation;GO:0045670 regulation of osteoclast differentiation		CD markers					1.0	1.0	0.0	0.0	1.0	0.0	0.0	0.0	0.0	0.0	0.0	0.0	0.0	0.0	1.0	0.0	0.0	0.0	0.0	1.0
APOBR	55911	symbol	H. sapiens	55911	H. sapiens	APOBR	apolipoprotein B receptor	GO:0034447 very-low-density lipoprotein particle clearance;GO:0034381 plasma lipoprotein particle clearance;GO:0006641 triglyceride metabolic process							0.0	0.0	0.0	0.0	0.0	0.0	0.0	0.0	0.0	0.0	0.0	0.0	0.0	0.0	0.0	0.0	0.0	0.0	0.0	0.0
NCF4	4689	symbol	H. sapiens	4689	H. sapiens	NCF4	neutrophil cytosolic factor 4	GO:0002479 antigen processing and presentation of exogenous peptide antigen via MHC class I, TAP-dependent;GO:0042590 antigen processing and presentation of exogenous peptide antigen via MHC class I;GO:0002474 antigen processing and presentation of peptide antigen via MHC class I			Cytosol(Supported)			(M5950)HALLMARK ALLOGRAFT REJECTION	0.0	0.0	1.0	0.0	0.0	0.0	0.0	0.0	0.0	0.0	0.0	0.0	1.0	0.0	0.0	0.0	0.0	0.0	0.0	0.0
LYST	1130	symbol	H. sapiens	1130	H. sapiens	LYST	lysosomal trafficking regulator	GO:0033364 mast cell secretory granule organization;GO:0032510 endosome to lysosome transport via multivesicular body sorting pathway;GO:0032438 melanosome organization			Microtubule organizing center;Nucleoplasm;Plasma membrane(Approved)				0.0	0.0	0.0	0.0	0.0	0.0	0.0	0.0	0.0	0.0	0.0	0.0	0.0	0.0	0.0	0.0	0.0	0.0	0.0	1.0
NAIP	4671	symbol	H. sapiens	4671	H. sapiens	NAIP	NLR family apoptosis inhibitory protein	GO:1990001 inhibition of cysteine-type endopeptidase activity involved in apoptotic process;GO:0097340 inhibition of cysteine-type endopeptidase activity;GO:0097341 zymogen inhibition							0.0	0.0	1.0	1.0	0.0	0.0	0.0	0.0	1.0	0.0	0.0	0.0	0.0	0.0	0.0	0.0	0.0	0.0	0.0	0.0
NFE2	4778	symbol	H. sapiens	4778	H. sapiens	NFE2	nuclear factor, erythroid 2	GO:0045652 regulation of megakaryocyte differentiation;GO:0006337 nucleosome disassembly;GO:0031498 chromatin disassembly		Transcription factors/Basic domains	Actin filaments;Nucleoplasm(Approved)			(M5945)HALLMARK HEME METABOLISM	0.0	1.0	0.0	0.0	0.0	0.0	0.0	1.0	0.0	0.0	0.0	0.0	0.0	0.0	1.0	0.0	0.0	0.0	0.0	0.0
HSPA1A	3303	symbol	H. sapiens	3303	H. sapiens	HSPA1A	heat shock protein family A (Hsp70) member 1A	GO:0070434 positive regulation of nucleotide-binding oligomerization domain containing 2 signaling pathway;GO:1904722 positive regulation of mRNA endonucleolytic cleavage involved in unfolded protein response;GO:0070426 positive regulation of nucleotide-binding oligomerization domain containing signaling pathway			Nucleoplasm;Vesicles(Approved)			(M5921)HALLMARK COMPLEMENT	1.0	1.0	1.0	1.0	0.0	0.0	1.0	0.0	1.0	1.0	0.0	0.0	1.0	0.0	1.0	0.0	1.0	0.0	0.0	0.0
FURIN	5045	symbol	H. sapiens	5045	H. sapiens	FURIN	furin, paired basic amino acid cleaving enzyme	GO:0032904 negative regulation of nerve growth factor production;GO:0019082 viral protein processing;GO:0032804 negative regulation of low-density lipoprotein particle receptor catabolic process		Enzymes/{ENZYME proteins/Hydrolases,Peptidases/Serine-type peptidases}	Golgi apparatus(Supported)Nucleoplasm(Approved)	Decanoic Acid (Serine-type endopeptidase inhibitor activity);Pirfenidone (Serine-type endopeptidase inhibitor activity)	(M17)PID NOTCH PATHWAY; (M255)PID HIF1 TFPATHWAY; (M153)PID P75 NTR PATHWAY	(M5896)HALLMARK TGF BETA SIGNALING; (M5946)HALLMARK COAGULATION; (M5941)HALLMARK UV RESPONSE UP	0.0	0.0	0.0	1.0	0.0	0.0	0.0	0.0	1.0	0.0	0.0	0.0	0.0	0.0	0.0	0.0	1.0	0.0	0.0	0.0
KLF13	51621	symbol	H. sapiens	51621	H. sapiens	KLF13	Kruppel like factor 13	GO:0045647 negative regulation of erythrocyte differentiation;GO:0045646 regulation of erythrocyte differentiation;GO:0045638 negative regulation of myeloid cell differentiation		Transcription factors/Zinc-coordinating DNA-binding domains					0.0	1.0	0.0	0.0	1.0	0.0	0.0	0.0	0.0	0.0	0.0	0.0	0.0	0.0	1.0	0.0	0.0	0.0	0.0	0.0
TRANK1	9881	symbol	H. sapiens	9881	H. sapiens	TRANK1	tetratricopeptide repeat and ankyrin repeat containing 1				Nucleoplasm(Approved)				0.0	0.0	0.0	0.0	0.0	0.0	0.0	0.0	0.0	0.0	0.0	0.0	0.0	0.0	0.0	0.0	0.0	0.0	0.0	0.0
LYZ	4069	symbol	H. sapiens	4069	H. sapiens	LYZ	lysozyme	GO:0043312 neutrophil degranulation;GO:0016998 cell wall macromolecule catabolic process;GO:0002283 neutrophil activation involved in immune response		Enzymes/ENZYME proteins/Hydrolases	Golgi apparatus(Supported)Actin filaments;Nucleoplasm(Uncertain)	L-Aspartic Acid (Lysozyme activity);(R)-Propylene glycol (Lysozyme activity);Cu-Bicyclam (Lysozyme activity);4-Methylumbelliferyl Chitobiose (Lysozyme activity);Sucrose (Lysozyme activity);Arsanilic acid (Lysozyme activity);Di(N-Acetyl-D-Glucosamine) (Lysozyme activity);Para-Toluene Sulfonate (Lysozyme activity);1-Proponol (Lysozyme activity);Cu-Cyclam (Lysozyme activity);3-Aminosuccinimide (Lyso…	(M195)PID CMYB PATHWAY		1.0	0.0	0.0	1.0	0.0	0.0	0.0	0.0	0.0	0.0	0.0	0.0	0.0	0.0	0.0	0.0	0.0	0.0	0.0	0.0
THBD	7056	symbol	H. sapiens	7056	H. sapiens	THBD	thrombomodulin	GO:0051918 negative regulation of fibrinolysis;GO:0051917 regulation of fibrinolysis;GO:0010544 negative regulation of platelet activation		CD markers	Cytosol;Nucleoplasm(Approved)	Drotrecogin alfa (Transmembrane signaling receptor activity);Ibuprofen (Transmembrane signaling receptor activity)	(M65)PID FRA PATHWAY	(M5944)HALLMARK ANGIOGENESIS; (M5946)HALLMARK COAGULATION	0.0	1.0	0.0	1.0	1.0	0.0	0.0	0.0	0.0	0.0	0.0	0.0	0.0	0.0	0.0	0.0	0.0	0.0	0.0	0.0
JAK3	3718	symbol	H. sapiens	3718	H. sapiens	JAK3	Janus kinase 3	GO:0045626 negative regulation of T-helper 1 cell differentiation;GO:0045625 regulation of T-helper 1 cell differentiation;GO:0045623 negative regulation of T-helper cell differentiation	Tyr protein kinase family	Enzymes/{ENZYME proteins/Transferases,Kinases/Tyr protein kinases}		2-(1,1-DIMETHYLETHYL)9-FLUORO-3,6-DIHYDRO-7H-BENZ[H]-IMIDAZ[4,5-F]ISOQUINOLIN-7-ONE (Protein tyrosine kinase activity);3-{(3R,4R)-4-methyl-3-[methyl(7H-pyrrolo[2,3-d]pyrimidin-4-yl)amino]piperidin-1-yl}-3-oxopropanenitrile (Protein tyrosine kinase activity);Tofacitinib (Protein tyrosine kinase activity)	(M5248)ST JAK STAT PATHWAY; (M9174)ST STAT3 PATHWAY; (M9378)ST INTERLEUKIN 4 PATHWAY		1.0	1.0	0.0	1.0	1.0	0.0	0.0	0.0	0.0	1.0	1.0	0.0	0.0	0.0	1.0	1.0	0.0	0.0	0.0	1.0
FAM212B	55924	symbol	H. sapiens	55924	H. sapiens	FAM212B	family with sequence similarity 212 member B	GO:0071901 negative regulation of protein serine/threonine kinase activity;GO:0006469 negative regulation of protein kinase activity;GO:0033673 negative regulation of kinase activity			Nucleus(Approved)				0.0	0.0	0.0	0.0	0.0	0.0	0.0	0.0	0.0	0.0	0.0	0.0	0.0	0.0	0.0	0.0	0.0	0.0	0.0	0.0
ARHGAP27	201176	symbol	H. sapiens	201176	H. sapiens	ARHGAP27	Rho GTPase activating protein 27	GO:0006898 receptor-mediated endocytosis;GO:0043547 positive regulation of GTPase activity;GO:0043087 regulation of GTPase activity			Cytosol;Nucleus(Supported)			(M5893)HALLMARK MITOTIC SPINDLE	0.0	0.0	0.0	0.0	0.0	0.0	0.0	0.0	1.0	0.0	0.0	0.0	1.0	0.0	0.0	0.0	0.0	0.0	0.0	0.0
SHISA5	51246	symbol	H. sapiens	51246	H. sapiens	SHISA5	shisa family member 5	GO:0042771 intrinsic apoptotic signaling pathway in response to DNA damage by p53 class mediator;GO:0072332 intrinsic apoptotic signaling pathway by p53 class mediator;GO:0008630 intrinsic apoptotic signaling pathway in response to DNA damage							0.0	0.0	0.0	0.0	0.0	0.0	0.0	0.0	0.0	0.0	0.0	0.0	0.0	0.0	0.0	0.0	0.0	0.0	0.0	0.0
NUAK2	81788	symbol	H. sapiens	81788	H. sapiens	NUAK2	NUAK family kinase 2	GO:0042149 cellular response to glucose starvation;GO:0009267 cellular response to starvation;GO:0031669 cellular response to nutrient levels	CAMK Ser/Thr protein kinase family	Enzymes/{ENZYME proteins/Transferases,Kinases/CAMK Ser/Thr protein kinases}	Cytosol;Nucleoli fibrillar center;Nucleus(Approved)				0.0	0.0	0.0	0.0	0.0	0.0	0.0	0.0	0.0	0.0	0.0	0.0	0.0	0.0	0.0	0.0	0.0	0.0	0.0	0.0
FRAT2	23401	symbol	H. sapiens	23401	H. sapiens	FRAT2	FRAT2, WNT signaling pathway regulator	GO:1904886 beta-catenin destruction complex disassembly;GO:0060070 canonical Wnt signaling pathway;GO:0032984 protein-containing complex disassembly			Mitochondria;Nucleus(Approved)				0.0	0.0	0.0	0.0	0.0	0.0	0.0	0.0	0.0	0.0	0.0	0.0	0.0	0.0	0.0	0.0	0.0	0.0	0.0	0.0
MAPK1	5594	symbol	H. sapiens	5594	H. sapiens	MAPK1	mitogen-activated protein kinase 1	GO:0060397 JAK-STAT cascade involved in growth hormone signaling pathway;GO:0015966 diadenosine tetraphosphate biosynthetic process;GO:0033160 positive regulation of protein import into nucleus, translocation	CMGC Ser/Thr protein kinase family	Enzymes/{ENZYME proteins/Transferases,Kinases/CMGC Ser/Thr protein kinases};RAS pathway related proteins		Isoprenaline (Rna polymerase ii carboxy-terminal domain kinase activity);Arsenic trioxide (Rna polymerase ii carboxy-terminal domain kinase activity);Olomoucine (Rna polymerase ii carboxy-terminal domain kinase activity);Phosphonothreonine (Rna polymerase ii carboxy-terminal domain kinase activity);Purvalanol (Rna polymerase ii carboxy-terminal domain kinase activity);SB220025 (Rna polymerase ii …	(M134)PID TCR RAS PATHWAY; (M64)PID S1P S1P4 PATHWAY; (M120)PID ARF6 DOWNSTREAM PATHWAY	(M5910)HALLMARK PROTEIN SECRETION; (M5923)HALLMARK PI3K AKT MTOR SIGNALING	1.0	0.0	0.0	0.0	0.0	0.0	1.0	0.0	0.0	1.0	1.0	0.0	1.0	0.0	0.0	0.0	1.0	0.0	0.0	0.0
TET2	54790	symbol	H. sapiens	54790	H. sapiens	TET2	tet methylcytosine dioxygenase 2	GO:0006211 5-methylcytosine catabolic process;GO:0080182 histone H3-K4 trimethylation;GO:0019857 5-methylcytosine metabolic process		Enzymes/ENZYME proteins/Oxidoreductases	Nucleoplasm(Approved)				0.0	0.0	0.0	0.0	0.0	0.0	0.0	1.0	0.0	0.0	0.0	0.0	0.0	0.0	1.0	0.0	0.0	0.0	0.0	0.0
TUBA4A	7277	symbol	H. sapiens	7277	H. sapiens	TUBA4A	tubulin alpha 4a	GO:0097711 ciliary basal body-plasma membrane docking;GO:0002576 platelet degranulation;GO:0010389 regulation of G2/M transition of mitotic cell cycle			Microtubules(Enhanced)	Vincristine (Structural constituent of cytoskeleton);Podofilox (Structural constituent of cytoskeleton);Epothilone D (Structural constituent of cytoskeleton);Epothilone B (Structural constituent of cytoskeleton);CYT997 (Structural constituent of cytoskeleton);S-8184 (Structural constituent of cytoskeleton);Cabazitaxel (Structural constituent of cytoskeleton)		(M5941)HALLMARK UV RESPONSE UP; (M5924)HALLMARK MTORC1 SIGNALING; (M5893)HALLMARK MITOTIC SPINDLE	1.0	0.0	1.0	0.0	0.0	0.0	0.0	0.0	0.0	0.0	0.0	0.0	1.0	0.0	0.0	0.0	0.0	0.0	0.0	0.0
TSC22D3	1831	symbol	H. sapiens	1831	H. sapiens	TSC22D3	TSC22 domain family member 3	GO:0070236 negative regulation of activation-induced cell death of T cells;GO:0070235 regulation of activation-induced cell death of T cells;GO:0070233 negative regulation of T cell apoptotic process		Transcription factors/Basic domains	Cytosol;Golgi apparatus;Nuclear speckles(Approved)				0.0	0.0	0.0	0.0	1.0	0.0	0.0	0.0	0.0	0.0	0.0	0.0	0.0	0.0	0.0	0.0	0.0	0.0	0.0	0.0
HSPA6	3310	symbol	H. sapiens	3310	H. sapiens	HSPA6	heat shock protein family A (Hsp70) member 6	GO:0070370 cellular heat acclimation;GO:0010286 heat acclimation;GO:0043312 neutrophil degranulation			Nucleoplasm;Vesicles(Approved)				1.0	0.0	0.0	0.0	0.0	0.0	0.0	0.0	0.0	0.0	0.0	0.0	1.0	0.0	0.0	0.0	0.0	0.0	0.0	0.0
KIAA0040	9674	symbol	H. sapiens	9674	H. sapiens	KIAA0040	KIAA0040				Nucleoplasm(Approved)				0.0	0.0	0.0	0.0	0.0	0.0	0.0	0.0	0.0	0.0	0.0	0.0	0.0	0.0	0.0	0.0	0.0	0.0	0.0	0.0
NUFIP2	57532	symbol	H. sapiens	57532	H. sapiens	NUFIP2	NUFIP2, FMR1 interacting protein 2				Cytosol;Nuclear bodies;Nucleoplasm(Supported)				0.0	0.0	0.0	0.0	0.0	0.0	0.0	0.0	0.0	0.0	0.0	0.0	0.0	0.0	0.0	0.0	0.0	0.0	0.0	0.0
FKBP1A	2280	symbol	H. sapiens	2280	H. sapiens	FKBP1A	FK506 binding protein 1A	GO:0060315 negative regulation of ryanodine-sensitive calcium-release channel activity;GO:0051280 negative regulation of release of sequestered calcium ion into cytosol;GO:0060314 regulation of ryanodine-sensitive calcium-release channel activity		Enzymes/ENZYME proteins/Isomerase		Pimecrolimus (Type i transforming growth factor beta receptor binding);Tacrolimus (Type i transforming growth factor beta receptor binding);Sirolimus (Type i transforming growth factor beta receptor binding);(3r)-4-(P-Toluenesulfonyl)-1,4-Thiazane-3-Carboxylicacid-L-Phenylalanine Ethyl Ester (Type i transforming growth factor beta receptor binding);{3-[3-(3,4-Dimethoxy-Phenyl)-1-(1-{1-[2-(3,4,5-T…	(M203)PID ALK2 PATHWAY; (M185)PID ALK1 PATHWAY; (M235)PID TCR CALCIUM PATHWAY	(M5896)HALLMARK TGF BETA SIGNALING	0.0	1.0	1.0	0.0	0.0	0.0	0.0	0.0	0.0	1.0	0.0	0.0	0.0	0.0	0.0	0.0	0.0	0.0	0.0	0.0
IFI16	3428	symbol	H. sapiens	3428	H. sapiens	IFI16	interferon gamma inducible protein 16	GO:0097202 activation of cysteine-type endopeptidase activity;GO:0045071 negative regulation of viral genome replication;GO:0030224 monocyte differentiation			Nucleoli;Nucleus(Supported)Cytosol(Approved)				0.0	1.0	0.0	1.0	1.0	0.0	1.0	0.0	1.0	0.0	0.0	0.0	0.0	0.0	1.0	0.0	1.0	0.0	0.0	1.0
BIN2	51411	symbol	H. sapiens	51411	H. sapiens	BIN2	bridging integrator 2	GO:0097320 plasma membrane tubulation;GO:0043312 neutrophil degranulation;GO:0071800 podosome assembly							1.0	0.0	0.0	0.0	0.0	0.0	0.0	0.0	0.0	0.0	0.0	0.0	0.0	0.0	0.0	0.0	0.0	0.0	0.0	0.0
TALDO1	6888	symbol	H. sapiens	6888	H. sapiens	TALDO1	transaldolase 1	GO:0005999 xylulose biosynthetic process;GO:0009052 pentose-phosphate shunt, non-oxidative branch;GO:0019322 pentose biosynthetic process		Enzymes/ENZYME proteins/Transferases	Cytosol;Nucleoplasm(Enhanced)			(M5951)HALLMARK SPERMATOGENESIS; (M5937)HALLMARK GLYCOLYSIS; (M5905)HALLMARK ADIPOGENESIS	0.0	0.0	0.0	0.0	0.0	0.0	0.0	0.0	0.0	1.0	0.0	0.0	0.0	0.0	0.0	0.0	0.0	0.0	0.0	0.0
PHF21A	51317	symbol	H. sapiens	51317	H. sapiens	PHF21A	PHD finger protein 21A	GO:0016575 histone deacetylation;GO:0006476 protein deacetylation;GO:0035601 protein deacylation							0.0	0.0	0.0	0.0	0.0	0.0	0.0	1.0	0.0	0.0	0.0	0.0	0.0	0.0	0.0	0.0	0.0	0.0	0.0	0.0
EGLN1	54583	symbol	H. sapiens	54583	H. sapiens	EGLN1	egl-9 family hypoxia inducible factor 1	GO:0030821 negative regulation of cAMP catabolic process;GO:0030820 regulation of cAMP catabolic process;GO:0030806 negative regulation of cyclic nucleotide catabolic process		Enzymes/ENZYME proteins/Oxidoreductases	Cytosol(Approved)	Vitamin C (Peptidyl-proline dioxygenase activity);FG-4592 (Peptidyl-proline dioxygenase activity);N-[(4-HYDROXY-8-IODOISOQUINOLIN-3-YL)CARBONYL]GLYCINE (Peptidyl-proline dioxygenase activity);N-[(1-CHLORO-4-HYDROXYISOQUINOLIN-3-YL)CARBONYL]GLYCINE (Peptidyl-proline dioxygenase activity)	(M180)PID HIF1A PATHWAY; (M44)PID HIF2PATHWAY; (M255)PID HIF1 TFPATHWAY		0.0	0.0	0.0	0.0	0.0	0.0	0.0	0.0	0.0	0.0	0.0	0.0	1.0	0.0	0.0	0.0	0.0	0.0	0.0	0.0
RNF10	9921	symbol	H. sapiens	9921	H. sapiens	RNF10	ring finger protein 10	GO:0010626 negative regulation of Schwann cell proliferation;GO:0010624 regulation of Schwann cell proliferation;GO:0031643 positive regulation of myelination			Mitochondria;Nucleoplasm(Approved)				0.0	0.0	1.0	0.0	0.0	0.0	0.0	0.0	0.0	0.0	0.0	0.0	0.0	0.0	0.0	0.0	0.0	0.0	0.0	0.0
UBR2	23304	symbol	H. sapiens	23304	H. sapiens	UBR2	ubiquitin protein ligase E3 component n-recognin 2	GO:0071596 ubiquitin-dependent protein catabolic process via the N-end rule pathway;GO:0071233 cellular response to leucine;GO:0007141 male meiosis I		Enzymes/ENZYME proteins/Transferases	Nucleoplasm;Plasma membrane(Approved)				0.0	0.0	1.0	0.0	0.0	0.0	0.0	1.0	0.0	0.0	0.0	0.0	0.0	0.0	0.0	0.0	0.0	0.0	0.0	0.0
LILRA2	11027	symbol	H. sapiens	11027	H. sapiens	LILRA2	leukocyte immunoglobulin like receptor A2	GO:0034144 negative regulation of toll-like receptor 4 signaling pathway;GO:0034143 regulation of toll-like receptor 4 signaling pathway;GO:0031665 negative regulation of lipopolysaccharide-mediated signaling pathway		CD markers					1.0	0.0	1.0	1.0	1.0	1.0	1.0	0.0	0.0	0.0	0.0	0.0	0.0	0.0	0.0	0.0	0.0	0.0	0.0	0.0
HIPK3	10114	symbol	H. sapiens	10114	H. sapiens	HIPK3	homeodomain interacting protein kinase 3	GO:0043508 negative regulation of JUN kinase activity;GO:0046329 negative regulation of JNK cascade;GO:0043407 negative regulation of MAP kinase activity	CMGC Ser/Thr protein kinase family	Enzymes/{ENZYME proteins/Transferases,Kinases/CMGC Ser/Thr protein kinases}	Cytosol;Nuclear bodies(Supported)				0.0	0.0	0.0	0.0	0.0	0.0	0.0	0.0	0.0	0.0	0.0	0.0	0.0	0.0	0.0	0.0	0.0	0.0	0.0	0.0
ZC3HAV1	56829	symbol	H. sapiens	56829	H. sapiens	ZC3HAV1	zinc finger CCCH-type containing, antiviral 1	GO:0070212 protein poly-ADP-ribosylation;GO:0045071 negative regulation of viral genome replication;GO:0061014 positive regulation of mRNA catabolic process			Cytosol(Enhanced)Golgi apparatus(Approved)				0.0	0.0	0.0	0.0	0.0	0.0	0.0	0.0	0.0	0.0	0.0	0.0	0.0	0.0	0.0	0.0	1.0	0.0	0.0	0.0
CDKN2D	1032	symbol	H. sapiens	1032	H. sapiens	CDKN2D	cyclin dependent kinase inhibitor 2D	GO:0031658 negative regulation of cyclin-dependent protein serine/threonine kinase activity involved in G1/S transition of mitotic cell cycle;GO:0031657 regulation of cyclin-dependent protein serine/threonine kinase activity involved in G1/S transition of mitotic cell cycle;GO:0045736 negative regulation of cyclin-dependent protein serine/threonine kinase activity			Cytosol;Nucleoplasm(Supported)			(M5938)HALLMARK REACTIVE OXIGEN SPECIES PATHWAY	0.0	0.0	0.0	0.0	0.0	0.0	0.0	0.0	1.0	0.0	0.0	0.0	1.0	0.0	0.0	0.0	0.0	0.0	0.0	0.0
TGOLN2	10618	symbol	H. sapiens	10618	H. sapiens	TGOLN2	trans-golgi network protein 2	GO:0006895 Golgi to endosome transport;GO:0006892 post-Golgi vesicle-mediated transport;GO:0016482 cytosolic transport			Golgi apparatus;Nucleoplasm(Enhanced)				0.0	0.0	0.0	0.0	0.0	0.0	0.0	0.0	0.0	0.0	0.0	0.0	0.0	0.0	0.0	0.0	0.0	0.0	0.0	0.0
ITGAM	3684	symbol	H. sapiens	3684	H. sapiens	ITGAM	integrin subunit alpha M	GO:0043315 positive regulation of neutrophil degranulation;GO:0045963 negative regulation of dopamine metabolic process;GO:1902565 positive regulation of neutrophil activation		CD markers			(M47)PID INTEGRIN CS PATHWAY; (M169)PID INTEGRIN2 PATHWAY; (M159)PID AMB2 NEUTROPHILS PATHWAY	(M5921)HALLMARK COMPLEMENT	1.0	1.0	0.0	1.0	0.0	0.0	1.0	0.0	1.0	1.0	0.0	1.0	0.0	0.0	0.0	0.0	0.0	0.0	1.0	1.0
TLR6	10333	symbol	H. sapiens	10333	H. sapiens	TLR6	toll like receptor 6	GO:0034136 negative regulation of toll-like receptor 2 signaling pathway;GO:0042496 detection of diacyl bacterial lipopeptide;GO:0034150 toll-like receptor 6 signaling pathway		CD markers	Endoplasmic reticulum(Approved)		(M264)PID TOLL ENDOGENOUS PATHWAY	(M5950)HALLMARK ALLOGRAFT REJECTION	1.0	1.0	1.0	1.0	1.0	0.0	1.0	0.0	1.0	0.0	0.0	0.0	0.0	0.0	0.0	0.0	0.0	0.0	0.0	1.0
TNFSF10	8743	symbol	H. sapiens	8743	H. sapiens	TNFSF10	TNF superfamily member 10	GO:0097296 activation of cysteine-type endopeptidase activity involved in apoptotic signaling pathway;GO:2001269 positive regulation of cysteine-type endopeptidase activity involved in apoptotic signaling pathway;GO:2001267 regulation of cysteine-type endopeptidase activity involved in apoptotic signaling pathway		CD markers	Microtubules(Approved)		(M79)PID TRAIL PATHWAY; (M5883)NABA SECRETED FACTORS; (M5885)NABA MATRISOME ASSOCIATED	(M5902)HALLMARK APOPTOSIS; (M5913)HALLMARK INTERFERON GAMMA RESPONSE; (M5947)HALLMARK IL2 STAT5 SIGNALING	0.0	0.0	0.0	0.0	0.0	0.0	0.0	0.0	1.0	1.0	0.0	0.0	0.0	0.0	0.0	0.0	0.0	0.0	0.0	0.0
AFF1	4299	symbol	H. sapiens	4299	H. sapiens	AFF1	AF4/FMR2 family member 1	GO:0006355 regulation of transcription, DNA-templated;GO:1903506 regulation of nucleic acid-templated transcription;GO:0006351 transcription, DNA-templated			Mitochondria;Nucleoplasm(Approved)			(M5907)HALLMARK ESTROGEN RESPONSE LATE; (M5906)HALLMARK ESTROGEN RESPONSE EARLY	0.0	0.0	0.0	0.0	0.0	0.0	0.0	0.0	0.0	0.0	0.0	1.0	0.0	0.0	0.0	0.0	0.0	0.0	0.0	0.0
AGO4	192670	symbol	H. sapiens	192670	H. sapiens	AGO4	argonaute 4, RISC catalytic component	GO:0090625 mRNA cleavage involved in gene silencing by siRNA;GO:0031054 pre-miRNA processing;GO:0035280 miRNA loading onto RISC involved in gene silencing by miRNA			Cytosol;Nucleoplasm(Enhanced)Nuclear bodies(Supported)			(M5898)HALLMARK DNA REPAIR	0.0	1.0	0.0	0.0	0.0	0.0	0.0	0.0	0.0	0.0	0.0	0.0	1.0	0.0	1.0	0.0	0.0	0.0	0.0	0.0
KLF7	8609	symbol	H. sapiens	8609	H. sapiens	KLF7	Kruppel like factor 7	GO:0007411 axon guidance;GO:0048813 dendrite morphogenesis;GO:0097485 neuron projection guidance		Transcription factors/Zinc-coordinating DNA-binding domains	Golgi apparatus(Approved)			(M5946)HALLMARK COAGULATION; (M5891)HALLMARK HYPOXIA	0.0	0.0	0.0	0.0	0.0	0.0	0.0	0.0	0.0	0.0	0.0	0.0	0.0	0.0	0.0	0.0	0.0	0.0	0.0	0.0
PGD	5226	symbol	H. sapiens	5226	H. sapiens	PGD	phosphogluconate dehydrogenase	GO:0009051 pentose-phosphate shunt, oxidative branch;GO:0019521 D-gluconate metabolic process;GO:0019322 pentose biosynthetic process		Enzymes/ENZYME proteins/Oxidoreductases	Cytosol;Intermediate filaments(Approved)	Gadopentetate dimeglumine (Phosphogluconate dehydrogenase (decarboxylating) activity);Dacarbazine (Phosphogluconate dehydrogenase (decarboxylating) activity);Ketotifen (Phosphogluconate dehydrogenase (decarboxylating) activity);6-Phosphogluconic Acid (Phosphogluconate dehydrogenase (decarboxylating) activity);Nicotinamide 8-Bromo-Adenine Dinucleotide Phosphate (Phosphogluconate dehydrogenase (dec…		(M5934)HALLMARK XENOBIOTIC METABOLISM	0.0	0.0	0.0	0.0	0.0	0.0	0.0	0.0	0.0	0.0	0.0	0.0	0.0	0.0	0.0	0.0	0.0	0.0	0.0	0.0
ATP2B4	493	symbol	H. sapiens	493	H. sapiens	ATP2B4	ATPase plasma membrane Ca2+ transporting 4	GO:1900082 negative regulation of arginine catabolic process;GO:1903249 negative regulation of citrulline biosynthetic process;GO:1900081 regulation of arginine catabolic process		Enzymes/ENZYME proteins/Hydrolases;Transporters/Primary Active Transporters	Plasma membrane(Supported)			(M5942)HALLMARK UV RESPONSE DN; (M5907)HALLMARK ESTROGEN RESPONSE LATE	0.0	0.0	0.0	0.0	0.0	0.0	0.0	0.0	0.0	0.0	0.0	0.0	0.0	0.0	0.0	0.0	0.0	0.0	0.0	0.0
CST7	8530	symbol	H. sapiens	8530	H. sapiens	CST7	cystatin F	GO:2000117 negative regulation of cysteine-type endopeptidase activity;GO:0010951 negative regulation of endopeptidase activity;GO:2000116 regulation of cysteine-type endopeptidase activity					(M3468)NABA ECM REGULATORS; (M5885)NABA MATRISOME ASSOCIATED; (M5889)NABA MATRISOME	(M5947)HALLMARK IL2 STAT5 SIGNALING	0.0	0.0	0.0	0.0	0.0	0.0	0.0	0.0	1.0	0.0	0.0	0.0	0.0	0.0	0.0	0.0	0.0	0.0	0.0	0.0
SP1	6667	symbol	H. sapiens	6667	H. sapiens	SP1	Sp1 transcription factor	GO:1904828 positive regulation of hydrogen sulfide biosynthetic process;GO:0100057 regulation of phenotypic switching by transcription from RNA polymerase II promoter;GO:1904826 regulation of hydrogen sulfide biosynthetic process		Transcription factors/Zinc-coordinating DNA-binding domains	Nucleoplasm(Enhanced)		(M234)PID IL2 STAT5 PATHWAY; (M44)PID HIF2PATHWAY; (M65)PID FRA PATHWAY	(M5939)HALLMARK P53 PATHWAY	0.0	0.0	0.0	0.0	0.0	0.0	0.0	0.0	0.0	0.0	0.0	1.0	1.0	0.0	0.0	0.0	1.0	0.0	0.0	0.0
TBC1D14	57533	symbol	H. sapiens	57533	H. sapiens	TBC1D14	TBC1 domain family member 14	GO:0071955 recycling endosome to Golgi transport;GO:2000785 regulation of autophagosome assembly;GO:1902017 regulation of cilium assembly			Golgi apparatus;Vesicles(Supported)Nucleoplasm(Approved)				0.0	0.0	0.0	0.0	0.0	0.0	0.0	0.0	1.0	0.0	0.0	0.0	0.0	0.0	0.0	0.0	0.0	0.0	0.0	0.0
LBR	3930	symbol	H. sapiens	3930	H. sapiens	LBR	lamin B receptor	GO:0006695 cholesterol biosynthetic process;GO:1902653 secondary alcohol biosynthetic process;GO:0008203 cholesterol metabolic process			Nuclear membrane(Enhanced)			(M5901)HALLMARK G2M CHECKPOINT; (M5925)HALLMARK E2F TARGETS	0.0	0.0	0.0	0.0	0.0	0.0	0.0	0.0	0.0	0.0	0.0	0.0	0.0	0.0	0.0	0.0	0.0	0.0	0.0	0.0
LILRA6	79168	symbol	H. sapiens	79168	H. sapiens	LILRA6	leukocyte immunoglobulin like receptor A6	GO:0002250 adaptive immune response;GO:0006955 immune response;GO:0002376 immune system process							0.0	0.0	0.0	0.0	0.0	0.0	0.0	0.0	0.0	0.0	0.0	0.0	0.0	0.0	0.0	0.0	0.0	0.0	0.0	1.0
LILRA3	11026	symbol	H. sapiens	11026	H. sapiens	LILRA3	leukocyte immunoglobulin like receptor A3	GO:0043312 neutrophil degranulation;GO:0002283 neutrophil activation involved in immune response;GO:0042119 neutrophil activation							1.0	0.0	1.0	0.0	0.0	1.0	0.0	0.0	0.0	0.0	0.0	0.0	0.0	0.0	0.0	0.0	0.0	0.0	0.0	1.0
KLF3	51274	symbol	H. sapiens	51274	H. sapiens	KLF3	Kruppel like factor 3	GO:1901653 cellular response to peptide;GO:0000122 negative regulation of transcription by RNA polymerase II;GO:1901652 response to peptide		Transcription factors/Zinc-coordinating DNA-binding domains	Nucleoplasm(Enhanced)			(M5945)HALLMARK HEME METABOLISM	0.0	0.0	0.0	0.0	0.0	0.0	0.0	0.0	0.0	0.0	0.0	1.0	0.0	0.0	0.0	0.0	0.0	0.0	0.0	0.0
PLCB2	5330	symbol	H. sapiens	5330	H. sapiens	PLCB2	phospholipase C beta 2	GO:0007202 activation of phospholipase C activity;GO:0010863 positive regulation of phospholipase C activity;GO:0007223 Wnt signaling pathway, calcium modulating pathway		Enzymes/ENZYME proteins/Hydrolases	Cytosol(Approved)		(M138)PID THROMBIN PAR4 PATHWAY; (M103)PID S1P S1P1 PATHWAY; (M252)PID IL8 CXCR1 PATHWAY	(M5902)HALLMARK APOPTOSIS	0.0	0.0	0.0	0.0	0.0	0.0	0.0	0.0	1.0	0.0	0.0	0.0	0.0	0.0	0.0	0.0	0.0	0.0	0.0	0.0
IDI1	3422	symbol	H. sapiens	3422	H. sapiens	IDI1	isopentenyl-diphosphate delta isomerase 1	GO:0050992 dimethylallyl diphosphate biosynthetic process;GO:0050993 dimethylallyl diphosphate metabolic process;GO:0045540 regulation of cholesterol biosynthetic process		Enzymes/ENZYME proteins/Isomerase		Dimethylallyl Diphosphate (Metal ion binding)		(M5892)HALLMARK CHOLESTEROL HOMEOSTASIS; (M5908)HALLMARK ANDROGEN RESPONSE; (M5949)HALLMARK PEROXISOME	0.0	0.0	0.0	0.0	0.0	0.0	0.0	0.0	0.0	0.0	0.0	0.0	0.0	0.0	0.0	0.0	0.0	0.0	0.0	0.0
GNG10	2790	symbol	H. sapiens	2790	H. sapiens	GNG10	G protein subunit gamma 10	GO:0071377 cellular response to glucagon stimulus;GO:0033762 response to glucagon;GO:0071375 cellular response to peptide hormone stimulus		RAS pathway related proteins					0.0	0.0	0.0	0.0	0.0	0.0	0.0	0.0	0.0	0.0	0.0	0.0	0.0	0.0	0.0	0.0	0.0	0.0	0.0	0.0
TLR8	51311	symbol	H. sapiens	51311	H. sapiens	TLR8	toll like receptor 8	GO:0034158 toll-like receptor 8 signaling pathway;GO:2001183 negative regulation of interleukin-12 secretion;GO:0045356 positive regulation of interferon-alpha biosynthetic process		CD markers		Imiquimod (Single-stranded rna binding)		(M5953)HALLMARK KRAS SIGNALING UP	1.0	0.0	0.0	1.0	0.0	0.0	1.0	0.0	0.0	0.0	0.0	0.0	0.0	1.0	0.0	0.0	0.0	0.0	0.0	1.0
IL6R	3570	symbol	H. sapiens	3570	H. sapiens	IL6R	interleukin 6 receptor	GO:0002384 hepatic immune response;GO:0070120 ciliary neurotrophic factor-mediated signaling pathway;GO:0070102 interleukin-6-mediated signaling pathway		CD markers		Tocilizumab (Protein homodimerization activity)	(M9174)ST STAT3 PATHWAY; (M11736)SA MMP CYTOKINE CONNECTION; (M183)PID IL6 7 PATHWAY		0.0	0.0	0.0	1.0	0.0	0.0	0.0	0.0	0.0	1.0	1.0	0.0	0.0	0.0	0.0	0.0	0.0	0.0	1.0	0.0
RAB11FIP1	80223	symbol	H. sapiens	80223	H. sapiens	RAB11FIP1	RAB11 family interacting protein 1	GO:0070164 negative regulation of adiponectin secretion;GO:0070163 regulation of adiponectin secretion;GO:0070162 adiponectin secretion			Vesicles(Enhanced)				1.0	0.0	0.0	0.0	0.0	0.0	0.0	0.0	0.0	0.0	0.0	0.0	0.0	0.0	0.0	0.0	0.0	0.0	0.0	0.0
WDTC1	23038	symbol	H. sapiens	23038	H. sapiens	WDTC1	WD and tetratricopeptide repeats 1	GO:0045717 negative regulation of fatty acid biosynthetic process;GO:0045922 negative regulation of fatty acid metabolic process;GO:0042304 regulation of fatty acid biosynthetic process			Vesicles(Supported)Golgi apparatus(Approved)				0.0	0.0	1.0	0.0	0.0	0.0	0.0	0.0	0.0	0.0	0.0	0.0	0.0	0.0	0.0	0.0	0.0	0.0	0.0	0.0
PRKAR1A	5573	symbol	H. sapiens	5573	H. sapiens	PRKAR1A	protein kinase cAMP-dependent type I regulatory subunit alpha	GO:0046007 negative regulation of activated T cell proliferation;GO:2000480 negative regulation of cAMP-dependent protein kinase activity;GO:0034199 activation of protein kinase A activity			Cytosol(Approved)	Sp-Adenosine-3',5'-Cyclic-Monophosphorothioate (Ubiquitin protein ligase binding);Cyclic Guanosine Monophosphate (Ubiquitin protein ligase binding);Cyclic Adenosine Monophosphate (Ubiquitin protein ligase binding);GEM-231 (Ubiquitin protein ligase binding)	(M277)PID INTEGRIN A4B1 PATHWAY		0.0	1.0	0.0	0.0	1.0	0.0	0.0	0.0	0.0	0.0	0.0	0.0	0.0	0.0	0.0	0.0	0.0	0.0	0.0	0.0
PAK2	5062	symbol	H. sapiens	5062	H. sapiens	PAK2	p21 (RAC1) activated kinase 2	GO:2001271 negative regulation of cysteine-type endopeptidase activity involved in execution phase of apoptosis;GO:2001270 regulation of cysteine-type endopeptidase activity involved in execution phase of apoptosis;GO:0002223 stimulatory C-type lectin receptor signaling pathway	STE Ser/Thr protein kinase family	Enzymes/{ENZYME proteins/Transferases,Kinases/STE Ser/Thr protein kinases};RAS pathway related proteins	Nucleus(Enhanced)Vesicles(Supported)		(M139)PID MYC PATHWAY; (M76)PID P38 ALPHA BETA PATHWAY; (M16801)SIG REGULATION OF THE ACTIN CYTOSKELETON BY RHO GTPASES		0.0	1.0	1.0	1.0	0.0	0.0	1.0	0.0	1.0	1.0	1.0	0.0	1.0	0.0	0.0	0.0	1.0	0.0	0.0	0.0
CASP4	837	symbol	H. sapiens	837	H. sapiens	CASP4	caspase 4	GO:1903265 positive regulation of tumor necrosis factor-mediated signaling pathway;GO:0010803 regulation of tumor necrosis factor-mediated signaling pathway;GO:1904646 cellular response to amyloid-beta		Enzymes/{ENZYME proteins/Hydrolases,Peptidases/Cysteine-type peptidases}	Cytosol;Plasma membrane(Approved)		(M220)PID CASPASE PATHWAY	(M5902)HALLMARK APOPTOSIS; (M5921)HALLMARK COMPLEMENT; (M5913)HALLMARK INTERFERON GAMMA RESPONSE	0.0	0.0	0.0	1.0	0.0	0.0	0.0	0.0	0.0	1.0	0.0	0.0	0.0	0.0	0.0	0.0	0.0	0.0	0.0	0.0
AKAP13	11214	symbol	H. sapiens	11214	H. sapiens	AKAP13	A-kinase anchoring protein 13	GO:1900169 regulation of glucocorticoid mediated signaling pathway;GO:0086023 adenylate cyclase-activating adrenergic receptor signaling pathway involved in heart process;GO:0043402 glucocorticoid mediated signaling pathway			Cytosol(Supported)		(M238)PID THROMBIN PAR1 PATHWAY; (M68)PID RHOA REG PATHWAY	(M5893)HALLMARK MITOTIC SPINDLE	0.0	0.0	0.0	0.0	0.0	0.0	0.0	0.0	1.0	0.0	0.0	0.0	1.0	0.0	0.0	0.0	0.0	0.0	0.0	0.0
UBN1	29855	symbol	H. sapiens	29855	H. sapiens	UBN1	ubinuclein 1	GO:0006336 DNA replication-independent nucleosome assembly;GO:0034724 DNA replication-independent nucleosome organization;GO:0006334 nucleosome assembly			Nuclear bodies;Nucleoplasm(Supported)				0.0	0.0	0.0	0.0	0.0	0.0	0.0	1.0	0.0	0.0	0.0	0.0	1.0	0.0	0.0	0.0	1.0	0.0	0.0	0.0
PPP4R1	9989	symbol	H. sapiens	9989	H. sapiens	PPP4R1	protein phosphatase 4 regulatory subunit 1	GO:0043666 regulation of phosphoprotein phosphatase activity;GO:0035304 regulation of protein dephosphorylation;GO:0010921 regulation of phosphatase activity			Nucleoplasm(Approved)				0.0	0.0	0.0	0.0	0.0	0.0	0.0	0.0	0.0	0.0	0.0	0.0	0.0	0.0	0.0	0.0	0.0	0.0	0.0	0.0
PLPPR2	64748	symbol	H. sapiens	64748	H. sapiens	PLPPR2	phospholipid phosphatase related 2	GO:0046839 phospholipid dephosphorylation;GO:0030258 lipid modification;GO:0006644 phospholipid metabolic process		Enzymes/ENZYME proteins/Hydrolases	Nucleoplasm(Approved)				0.0	0.0	0.0	0.0	0.0	0.0	0.0	0.0	0.0	0.0	0.0	0.0	0.0	0.0	0.0	0.0	0.0	0.0	0.0	0.0
HRH2	3274	symbol	H. sapiens	3274	H. sapiens	HRH2	histamine receptor H2	GO:0001697 histamine-induced gastric acid secretion;GO:0001698 gastrin-induced gastric acid secretion;GO:0045907 positive regulation of vasoconstriction		G-protein coupled receptors/GPCRs excl olfactory receptors		Betazole (Histamine receptor activity);Amitriptyline (Histamine receptor activity);Olanzapine (Histamine receptor activity);Loxapine (Histamine receptor activity);Cimetidine (Histamine receptor activity);Nizatidine (Histamine receptor activity);Histamine Phosphate (Histamine receptor activity);Epinastine (Histamine receptor activity);Tolazoline (Histamine receptor activity);Ranitidine (Histamine …			0.0	0.0	0.0	0.0	0.0	0.0	0.0	0.0	0.0	0.0	0.0	0.0	0.0	0.0	0.0	0.0	0.0	0.0	0.0	0.0
PARP9	83666	symbol	H. sapiens	83666	H. sapiens	PARP9	poly(ADP-ribose) polymerase family member 9	GO:2001034 positive regulation of double-strand break repair via nonhomologous end joining;GO:0060335 positive regulation of interferon-gamma-mediated signaling pathway;GO:0034356 NAD biosynthesis via nicotinamide riboside salvage pathway		Enzymes/ENZYME proteins/Transferases	Cytosol;Nucleoplasm(Supported)Mitochondria(Approved)			(M5911)HALLMARK INTERFERON ALPHA RESPONSE	0.0	0.0	0.0	1.0	0.0	0.0	1.0	0.0	0.0	1.0	0.0	0.0	0.0	0.0	0.0	0.0	0.0	0.0	0.0	1.0
TSEN34	79042	symbol	H. sapiens	79042	H. sapiens	TSEN34	tRNA splicing endonuclease subunit 34	GO:0000379 tRNA-type intron splice site recognition and cleavage;GO:0006388 tRNA splicing, via endonucleolytic cleavage and ligation;GO:0000394 RNA splicing, via endonucleolytic cleavage and ligation		Enzymes/ENZYME proteins/Lyases	Nucleus(Supported)				0.0	0.0	0.0	0.0	0.0	0.0	0.0	0.0	0.0	0.0	0.0	0.0	0.0	0.0	0.0	0.0	0.0	0.0	0.0	0.0
OSBPL8	114882	symbol	H. sapiens	114882	H. sapiens	OSBPL8	oxysterol binding protein like 8	GO:2001275 positive regulation of glucose import in response to insulin stimulus;GO:2001273 regulation of glucose import in response to insulin stimulus;GO:0046628 positive regulation of insulin receptor signaling pathway		Transporters/Electrochemical Potential-driven transporters	Cytosol;Vesicles(Approved)				0.0	0.0	0.0	0.0	0.0	0.0	0.0	0.0	0.0	0.0	0.0	0.0	0.0	0.0	0.0	0.0	0.0	0.0	0.0	0.0
MAP3K1	4214	symbol	H. sapiens	4214	H. sapiens	MAP3K1	mitogen-activated protein kinase kinase kinase 1	GO:0002755 MyD88-dependent toll-like receptor signaling pathway;GO:0000186 activation of MAPKK activity;GO:0002224 toll-like receptor signaling pathway	STE Ser/Thr protein kinase family	Enzymes/{ENZYME proteins/Transferases,Kinases/STE Ser/Thr protein kinases}	Cytosol(Approved)	AZD-8330 (Zinc ion binding)	(M190)PID TCR JNK PATHWAY; (M228)PID SMAD2 3PATHWAY; (M17200)SA B CELL RECEPTOR COMPLEXES	(M5953)HALLMARK KRAS SIGNALING UP; (M5891)HALLMARK HYPOXIA	0.0	0.0	0.0	1.0	0.0	0.0	1.0	0.0	0.0	0.0	0.0	0.0	0.0	0.0	0.0	0.0	0.0	0.0	0.0	0.0
XKR8	55113	symbol	H. sapiens	55113	H. sapiens	XKR8	XK related 8	GO:0070782 phosphatidylserine exposure on apoptotic cell surface;GO:0043652 engulfment of apoptotic cell;GO:0017121 phospholipid scrambling		Transporters/Electrochemical Potential-driven transporters	Golgi apparatus(Approved)				0.0	0.0	0.0	0.0	0.0	0.0	0.0	0.0	0.0	0.0	0.0	0.0	0.0	0.0	0.0	0.0	0.0	0.0	0.0	0.0
TNFRSF1A	7132	symbol	H. sapiens	7132	H. sapiens	TNFRSF1A	TNF receptor superfamily member 1A	GO:2000304 positive regulation of ceramide biosynthetic process;GO:0090154 positive regulation of sphingolipid biosynthetic process;GO:1903140 regulation of establishment of endothelial barrier		CD markers		6-[3-(4-Morpholinyl)Propyl]-2-(3-Nitrophenyl)-5-Thioxo-5,6,-Dihydro-7h-Thienol[2',3':4,5]Pyrrolo[1,2-C]Imidazol-7-One (Tumor necrosis factor-activated receptor activity)	(M11736)SA MMP CYTOKINE CONNECTION; (M37)PID NFKAPPAB CANONICAL PATHWAY; (M18030)ST TUMOR NECROSIS FACTOR PATHWAY	(M5897)HALLMARK IL6 JAK STAT3 SIGNALING; (M5923)HALLMARK PI3K AKT MTOR SIGNALING; (M5934)HALLMARK XENOBIOTIC METABOLISM	0.0	0.0	0.0	1.0	0.0	0.0	0.0	0.0	0.0	1.0	0.0	0.0	0.0	0.0	0.0	0.0	1.0	0.0	0.0	0.0
SLC12A9	56996	symbol	H. sapiens	56996	H. sapiens	SLC12A9	solute carrier family 12 member 9	GO:1902476 chloride transmembrane transport;GO:0071805 potassium ion transmembrane transport;GO:0006821 chloride transport		Transporters/Electrochemical Potential-driven transporters					0.0	0.0	0.0	0.0	0.0	0.0	0.0	0.0	0.0	0.0	0.0	0.0	0.0	0.0	0.0	0.0	0.0	0.0	0.0	0.0
IFIT1	3434	symbol	H. sapiens	3434	H. sapiens	IFIT1	interferon induced protein with tetratricopeptide repeats 1	GO:0019060 intracellular transport of viral protein in host cell;GO:0030581 symbiont intracellular protein transport in host;GO:0050689 negative regulation of defense response to virus by host			Cytosol(Supported)			(M5922)HALLMARK UNFOLDED PROTEIN RESPONSE; (M5913)HALLMARK INTERFERON GAMMA RESPONSE	0.0	0.0	0.0	1.0	1.0	0.0	0.0	0.0	0.0	1.0	0.0	0.0	0.0	0.0	0.0	0.0	1.0	0.0	0.0	1.0
SAMD9L	219285	symbol	H. sapiens	219285	H. sapiens	SAMD9L	sterile alpha motif domain containing 9 like	GO:0034058 endosomal vesicle fusion;GO:0006906 vesicle fusion;GO:0090174 organelle membrane fusion			Cytosol(Approved)			(M5911)HALLMARK INTERFERON ALPHA RESPONSE; (M5913)HALLMARK INTERFERON GAMMA RESPONSE	0.0	0.0	0.0	0.0	0.0	0.0	0.0	0.0	0.0	0.0	0.0	0.0	0.0	0.0	0.0	0.0	0.0	0.0	0.0	0.0
SETX	23064	symbol	H. sapiens	23064	H. sapiens	SETX	senataxin	GO:2000806 positive regulation of termination of RNA polymerase II transcription, poly(A)-coupled;GO:1904595 positive regulation of termination of RNA polymerase II transcription;GO:2000804 regulation of termination of RNA polymerase II transcription, poly(A)-coupled			Nucleus(Supported)Cytokinetic bridge(Approved)				0.0	0.0	0.0	0.0	0.0	0.0	0.0	0.0	0.0	0.0	0.0	0.0	0.0	0.0	0.0	0.0	0.0	0.0	0.0	0.0
RAB31	11031	symbol	H. sapiens	11031	H. sapiens	RAB31	RAB31, member RAS oncogene family	GO:0043001 Golgi to plasma membrane protein transport;GO:0043312 neutrophil degranulation;GO:0061951 establishment of protein localization to plasma membrane						(M5896)HALLMARK TGF BETA SIGNALING; (M5907)HALLMARK ESTROGEN RESPONSE LATE; (M5906)HALLMARK ESTROGEN RESPONSE EARLY	1.0	0.0	0.0	0.0	0.0	0.0	0.0	0.0	0.0	0.0	0.0	0.0	0.0	0.0	0.0	0.0	0.0	0.0	0.0	0.0
CARD8	22900	symbol	H. sapiens	22900	H. sapiens	CARD8	caspase recruitment domain family member 8	GO:0050713 negative regulation of interleukin-1 beta secretion;GO:0031665 negative regulation of lipopolysaccharide-mediated signaling pathway;GO:0050718 positive regulation of interleukin-1 beta secretion			Cytosol;Nucleoplasm(Enhanced)				0.0	0.0	0.0	1.0	0.0	0.0	0.0	0.0	1.0	1.0	0.0	0.0	0.0	0.0	0.0	0.0	0.0	0.0	0.0	0.0
ZNF516	9658	symbol	H. sapiens	9658	H. sapiens	ZNF516	zinc finger protein 516	GO:0050873 brown fat cell differentiation;GO:0060612 adipose tissue development;GO:0009409 response to cold		Transcription factors/Zinc-coordinating DNA-binding domains	Cytosol;Nucleoplasm(Approved)				0.0	0.0	0.0	0.0	0.0	0.0	0.0	0.0	0.0	0.0	0.0	0.0	0.0	0.0	0.0	0.0	0.0	0.0	0.0	0.0
TNRC18	84629	symbol	H. sapiens	84629	H. sapiens	TNRC18	trinucleotide repeat containing 18	GO:0031507 heterochromatin assembly;GO:0070828 heterochromatin organization;GO:0006342 chromatin silencing			Cytosol;Mitochondria;Nuclear membrane;Nucleoplasm(Approved)				0.0	0.0	0.0	0.0	0.0	0.0	0.0	1.0	0.0	0.0	0.0	0.0	0.0	0.0	0.0	0.0	0.0	0.0	0.0	0.0
CDKN1B	1027	symbol	H. sapiens	1027	H. sapiens	CDKN1B	cyclin dependent kinase inhibitor 1B	GO:0006977 DNA damage response, signal transduction by p53 class mediator resulting in cell cycle arrest;GO:1902746 regulation of lens fiber cell differentiation;GO:0072431 signal transduction involved in mitotic G1 DNA damage checkpoint			Nucleus(Supported)Vesicles(Approved)		(M3686)SA REG CASCADE OF CYCLIN EXPR; (M1529)SA G1 AND S PHASES; (M249)PID PI3KCI AKT PATHWAY	(M5923)HALLMARK PI3K AKT MTOR SIGNALING; (M5942)HALLMARK UV RESPONSE DN; (M5902)HALLMARK APOPTOSIS	0.0	0.0	0.0	0.0	0.0	0.0	0.0	0.0	1.0	0.0	0.0	1.0	1.0	0.0	0.0	0.0	0.0	0.0	0.0	0.0
CCPG1	9236	symbol	H. sapiens	9236	H. sapiens	CCPG1	cell cycle progression 1	GO:2001106 regulation of Rho guanyl-nucleotide exchange factor activity;GO:1904475 regulation of Ras GTPase binding;GO:1905097 regulation of guanyl-nucleotide exchange factor activity			Endoplasmic reticulum;Golgi apparatus(Approved)				0.0	0.0	0.0	0.0	0.0	0.0	0.0	0.0	0.0	0.0	0.0	0.0	0.0	0.0	0.0	0.0	0.0	0.0	0.0	0.0
LAPTM4A	9741	symbol	H. sapiens	9741	H. sapiens	LAPTM4A	lysosomal protein transmembrane 4 alpha				Golgi apparatus;Plasma membrane;Vesicles(Approved)				0.0	0.0	0.0	0.0	0.0	0.0	0.0	0.0	0.0	0.0	0.0	0.0	0.0	0.0	0.0	0.0	0.0	0.0	0.0	0.0
WLS	79971	symbol	H. sapiens	79971	H. sapiens	WLS	wntless Wnt ligand secretion mediator	GO:0061357 positive regulation of Wnt protein secretion;GO:0061356 regulation of Wnt protein secretion;GO:0061355 Wnt protein secretion		Transporters/Accessory Factors Involved in Transport				(M5947)HALLMARK IL2 STAT5 SIGNALING	0.0	0.0	0.0	0.0	0.0	0.0	0.0	0.0	0.0	0.0	0.0	0.0	0.0	0.0	0.0	0.0	0.0	0.0	0.0	0.0
WNK1	65125	symbol	H. sapiens	65125	H. sapiens	WNK1	WNK lysine deficient protein kinase 1	GO:0090188 negative regulation of pancreatic juice secretion;GO:0023016 signal transduction by trans-phosphorylation;GO:0090186 regulation of pancreatic juice secretion	Other	Enzymes/{ENZYME proteins/Transferases,Kinases}	Cytosol(Supported)				0.0	0.0	0.0	0.0	0.0	0.0	0.0	0.0	0.0	0.0	0.0	0.0	0.0	0.0	0.0	0.0	0.0	0.0	0.0	0.0
SPEN	23013	symbol	H. sapiens	23013	H. sapiens	SPEN	spen family transcriptional repressor	GO:0000398 mRNA splicing, via spliceosome;GO:0000122 negative regulation of transcription by RNA polymerase II;GO:0050769 positive regulation of neurogenesis			Nucleoplasm(Enhanced)		(M288)PID HES HEY PATHWAY; (M17)PID NOTCH PATHWAY		0.0	0.0	0.0	0.0	0.0	0.0	0.0	0.0	0.0	0.0	0.0	0.0	0.0	0.0	0.0	0.0	1.0	0.0	0.0	0.0
SP110	3431	symbol	H. sapiens	3431	H. sapiens	SP110	SP110 nuclear body protein	GO:0016032 viral process;GO:0044403 symbiont process;GO:0044419 interspecies interaction between organisms		Transcription factors	Nucleus(Supported)			(M5911)HALLMARK INTERFERON ALPHA RESPONSE; (M5913)HALLMARK INTERFERON GAMMA RESPONSE	0.0	0.0	0.0	0.0	0.0	0.0	0.0	0.0	0.0	0.0	0.0	0.0	0.0	0.0	0.0	0.0	1.0	0.0	0.0	0.0
ARAP3	64411	symbol	H. sapiens	64411	H. sapiens	ARAP3	ArfGAP with RhoGAP domain, ankyrin repeat and PH domain 3	GO:0035021 negative regulation of Rac protein signal transduction;GO:0035024 negative regulation of Rho protein signal transduction;GO:0035020 regulation of Rac protein signal transduction					(M68)PID RHOA REG PATHWAY; (M141)PID PI3KCI PATHWAY	(M5893)HALLMARK MITOTIC SPINDLE	0.0	0.0	0.0	0.0	0.0	0.0	0.0	0.0	1.0	0.0	0.0	0.0	1.0	0.0	0.0	0.0	0.0	0.0	0.0	0.0
IRF2	3660	symbol	H. sapiens	3660	H. sapiens	IRF2	interferon regulatory factor 2	GO:0060337 type I interferon signaling pathway;GO:0060333 interferon-gamma-mediated signaling pathway;GO:0071357 cellular response to type I interferon		Transcription factors/Helix-turn-helix domains	Cytosol;Nucleoplasm(Enhanced)			(M5911)HALLMARK INTERFERON ALPHA RESPONSE; (M5913)HALLMARK INTERFERON GAMMA RESPONSE; (M5921)HALLMARK COMPLEMENT	0.0	0.0	0.0	0.0	0.0	0.0	0.0	0.0	0.0	1.0	0.0	0.0	0.0	0.0	0.0	0.0	0.0	0.0	0.0	0.0
TGFBR2	7048	symbol	H. sapiens	7048	H. sapiens	TGFBR2	transforming growth factor beta receptor 2	GO:0003430 growth plate cartilage chondrocyte growth;GO:0003431 growth plate cartilage chondrocyte development;GO:0051138 positive regulation of NK T cell differentiation	TKL Ser/Thr protein kinase family	Enzymes/{ENZYME proteins/Transferases,Kinases/TKL Ser/Thr protein kinases}	Plasma membrane(Supported)	Glycerol (Type iii transforming growth factor beta receptor binding)	(M185)PID ALK1 PATHWAY; (M33)PID GLYPICAN 1PATHWAY; (M53)PID INTEGRIN3 PATHWAY	(M5942)HALLMARK UV RESPONSE DN	1.0	1.0	0.0	1.0	0.0	0.0	0.0	0.0	0.0	1.0	1.0	1.0	0.0	0.0	1.0	1.0	0.0	0.0	0.0	0.0
SLC16A3	9123	symbol	H. sapiens	9123	H. sapiens	SLC16A3	solute carrier family 16 member 3	GO:0035879 plasma membrane lactate transport;GO:0035873 lactate transmembrane transport;GO:0015727 lactate transport		Transporters/Electrochemical Potential-driven transporters	Plasma membrane(Supported)Nuclear membrane(Approved)	Pyruvic acid (Symporter activity)		(M5937)HALLMARK GLYCOLYSIS	0.0	0.0	0.0	0.0	0.0	0.0	0.0	0.0	0.0	0.0	0.0	0.0	0.0	0.0	0.0	0.0	0.0	0.0	0.0	0.0
LGALS8	3964	symbol	H. sapiens	3964	H. sapiens	LGALS8	galectin 8	GO:1904977 lymphatic endothelial cell migration;GO:0098792 xenophagy;GO:0036303 lymph vessel morphogenesis			Plasma membrane(Approved)		(M5880)NABA ECM AFFILIATED; (M5885)NABA MATRISOME ASSOCIATED; (M5889)NABA MATRISOME		0.0	0.0	0.0	0.0	0.0	0.0	0.0	0.0	0.0	0.0	0.0	0.0	0.0	0.0	0.0	0.0	0.0	0.0	0.0	0.0
F5	2153	symbol	H. sapiens	2153	H. sapiens	F5	coagulation factor V	GO:0048208 COPII vesicle coating;GO:0048207 vesicle targeting, rough ER to cis-Golgi;GO:0048199 vesicle targeting, to, from or within Golgi			Golgi apparatus(Approved)	Drotrecogin alfa (Copper ion binding);Thrombomodulin Alfa (Copper ion binding)		(M5921)HALLMARK COMPLEMENT	1.0	0.0	0.0	0.0	0.0	0.0	0.0	0.0	0.0	0.0	0.0	0.0	0.0	0.0	0.0	0.0	0.0	0.0	0.0	0.0
CDS2	8760	symbol	H. sapiens	8760	H. sapiens	CDS2	CDP-diacylglycerol synthase 2	GO:0016024 CDP-diacylglycerol biosynthetic process;GO:0006655 phosphatidylglycerol biosynthetic process;GO:0046341 CDP-diacylglycerol metabolic process		Enzymes/ENZYME proteins/Transferases	Cytosol;Endoplasmic reticulum(Approved)				0.0	0.0	0.0	0.0	0.0	0.0	0.0	0.0	0.0	0.0	0.0	0.0	0.0	0.0	0.0	0.0	0.0	0.0	0.0	0.0
CCR1	1230	symbol	H. sapiens	1230	H. sapiens	CCR1	C-C motif chemokine receptor 1	GO:0090026 positive regulation of monocyte chemotaxis;GO:0045672 positive regulation of osteoclast differentiation;GO:0071677 positive regulation of mononuclear cell migration		CD markers;G-protein coupled receptors/{Chemokines and chemotactic factors receptors,GPCRs excl olfactory receptors}				(M5897)HALLMARK IL6 JAK STAT3 SIGNALING; (M5950)HALLMARK ALLOGRAFT REJECTION	0.0	1.0	0.0	1.0	0.0	0.0	0.0	0.0	0.0	1.0	0.0	0.0	0.0	0.0	1.0	0.0	0.0	0.0	0.0	0.0
TOB1	10140	symbol	H. sapiens	10140	H. sapiens	TOB1	transducer of ERBB2, 1	GO:0060212 negative regulation of nuclear-transcribed mRNA poly(A) tail shortening;GO:1900152 negative regulation of nuclear-transcribed mRNA catabolic process, deadenylation-dependent decay;GO:0060213 positive regulation of nuclear-transcribed mRNA poly(A) tail shortening			Nucleoplasm;Vesicles(Approved)			(M5907)HALLMARK ESTROGEN RESPONSE LATE; (M5906)HALLMARK ESTROGEN RESPONSE EARLY; (M5905)HALLMARK ADIPOGENESIS	0.0	0.0	0.0	0.0	0.0	0.0	0.0	0.0	0.0	0.0	0.0	0.0	0.0	0.0	0.0	0.0	0.0	0.0	0.0	0.0
GLIPR2	152007	symbol	H. sapiens	152007	H. sapiens	GLIPR2	GLI pathogenesis related 2	GO:0010718 positive regulation of epithelial to mesenchymal transition;GO:0010717 regulation of epithelial to mesenchymal transition;GO:0010634 positive regulation of epithelial cell migration			Microtubules;Vesicles(Uncertain)	Cysteinesulfonic Acid (Protein homodimerization activity)		(M5947)HALLMARK IL2 STAT5 SIGNALING	0.0	0.0	0.0	0.0	0.0	0.0	0.0	0.0	0.0	0.0	0.0	0.0	0.0	0.0	0.0	0.0	0.0	0.0	0.0	0.0
LILRA5	353514	symbol	H. sapiens	353514	H. sapiens	LILRA5	leukocyte immunoglobulin like receptor A5	GO:0045087 innate immune response;GO:0006955 immune response;GO:0006952 defense response		CD markers					0.0	0.0	1.0	0.0	0.0	1.0	0.0	0.0	0.0	0.0	0.0	0.0	0.0	0.0	0.0	0.0	0.0	0.0	0.0	0.0
RALBP1	10928	symbol	H. sapiens	10928	H. sapiens	RALBP1	ralA binding protein 1	GO:1900753 doxorubicin transport;GO:1901656 glycoside transport;GO:0015695 organic cation transport		RAS pathway related proteins;Transporters	Cytosol;Nuclear membrane;Vesicles(Approved)		(M18030)ST TUMOR NECROSIS FACTOR PATHWAY; (M83)PID CDC42 REG PATHWAY; (M241)PID RAC1 REG PATHWAY	(M5893)HALLMARK MITOTIC SPINDLE	0.0	0.0	0.0	0.0	0.0	0.0	0.0	0.0	1.0	0.0	0.0	0.0	1.0	0.0	0.0	0.0	0.0	0.0	0.0	0.0
CLEC12A	160364	symbol	H. sapiens	160364	H. sapiens	CLEC12A	C-type lectin domain family 12 member A	GO:0043312 neutrophil degranulation;GO:0002283 neutrophil activation involved in immune response;GO:0042119 neutrophil activation					(M5880)NABA ECM AFFILIATED; (M5885)NABA MATRISOME ASSOCIATED; (M5889)NABA MATRISOME		1.0	0.0	0.0	0.0	0.0	0.0	0.0	0.0	0.0	0.0	0.0	0.0	0.0	0.0	0.0	0.0	0.0	0.0	0.0	0.0
MCTP2	55784	symbol	H. sapiens	55784	H. sapiens	MCTP2	multiple C2 and transmembrane domain containing 2	GO:0019722 calcium-mediated signaling;GO:0019932 second-messenger-mediated signaling;GO:0035556 intracellular signal transduction			Cytosol;Nucleoplasm(Enhanced)				0.0	0.0	0.0	0.0	0.0	0.0	0.0	0.0	0.0	0.0	0.0	0.0	0.0	0.0	0.0	0.0	0.0	0.0	0.0	0.0
KDM7A	80853	symbol	H. sapiens	80853	H. sapiens	KDM7A	lysine demethylase 7A	GO:0035574 histone H4-K20 demethylation;GO:0071557 histone H3-K27 demethylation;GO:0070544 histone H3-K36 demethylation			Nucleoli;Nucleoplasm(Approved)			(M5945)HALLMARK HEME METABOLISM	0.0	0.0	0.0	0.0	0.0	0.0	0.0	1.0	0.0	0.0	0.0	0.0	0.0	0.0	0.0	0.0	0.0	0.0	0.0	0.0
SKAP2	8935	symbol	H. sapiens	8935	H. sapiens	SKAP2	src kinase associated phosphoprotein 2	GO:0002757 immune response-activating signal transduction;GO:0042113 B cell activation;GO:0002253 activation of immune response			Cytosol;Nucleoplasm(Supported)			(M5915)HALLMARK APICAL JUNCTION; (M5924)HALLMARK MTORC1 SIGNALING	0.0	1.0	0.0	0.0	0.0	0.0	1.0	0.0	0.0	0.0	0.0	0.0	0.0	0.0	0.0	0.0	0.0	0.0	0.0	0.0
FAM120A	23196	symbol	H. sapiens	23196	H. sapiens	FAM120A	family with sequence similarity 120A				Cytosol(Enhanced)			(M5926)HALLMARK MYC TARGETS V1	0.0	0.0	0.0	0.0	0.0	0.0	0.0	0.0	0.0	0.0	0.0	0.0	0.0	0.0	0.0	0.0	0.0	0.0	0.0	0.0
C17orf62	79415	gene_synonym	H. sapiens	79415	H. sapiens	CYBC1	cytochrome b-245 chaperone 1				Cell Junctions;Plasma membrane(Approved)				0.0	0.0	0.0	0.0	0.0	0.0	0.0	0.0	0.0	0.0	0.0	0.0	0.0	0.0	0.0	0.0	0.0	0.0	0.0	0.0
DSC2	1824	symbol	H. sapiens	1824	H. sapiens	DSC2	desmocollin 2	GO:0086073 bundle of His cell-Purkinje myocyte adhesion involved in cell communication;GO:0098911 regulation of ventricular cardiac muscle cell action potential;GO:0086069 bundle of His cell to Purkinje myocyte communication						(M5937)HALLMARK GLYCOLYSIS	0.0	1.0	0.0	0.0	0.0	0.0	0.0	0.0	0.0	0.0	0.0	0.0	0.0	0.0	0.0	0.0	0.0	0.0	0.0	0.0
SEMA4A	64218	symbol	H. sapiens	64218	H. sapiens	SEMA4A	semaphorin 4A	GO:0045063 T-helper 1 cell differentiation;GO:0042093 T-helper cell differentiation;GO:0002294 CD4-positive, alpha-beta T cell differentiation involved in immune response			Nucleus(Enhanced)		(M5880)NABA ECM AFFILIATED; (M5885)NABA MATRISOME ASSOCIATED; (M5889)NABA MATRISOME		1.0	1.0	0.0	0.0	0.0	0.0	0.0	0.0	0.0	0.0	0.0	0.0	0.0	0.0	0.0	1.0	0.0	0.0	0.0	1.0
SEMA4B	10509	symbol	H. sapiens	10509	H. sapiens	SEMA4B	semaphorin 4B	GO:0050919 negative chemotaxis;GO:0006935 chemotaxis;GO:0042330 taxis					(M5880)NABA ECM AFFILIATED; (M5885)NABA MATRISOME ASSOCIATED; (M5889)NABA MATRISOME		0.0	0.0	0.0	0.0	0.0	0.0	0.0	0.0	0.0	0.0	0.0	0.0	0.0	0.0	0.0	0.0	0.0	0.0	0.0	0.0
ARPC1B	10095	symbol	H. sapiens	10095	H. sapiens	ARPC1B	actin related protein 2/3 complex subunit 1B	GO:0034314 Arp2/3 complex-mediated actin nucleation;GO:0038096 Fc-gamma receptor signaling pathway involved in phagocytosis;GO:0045010 actin nucleation			Cytosol;Vesicles(Supported)	N-[2-(2-methyl-1H-indol-3-yl)ethyl]thiophene-2-carboxamide (Structural constituent of cytoskeleton);(2S)-2-(3-bromophenyl)-3-(5-chloro-2-hydroxyphenyl)-1,3-thiazolidin-4-one (Structural constituent of cytoskeleton)	(M278)PID RAC1 PATHWAY; (M81)PID CDC42 PATHWAY; (M164)PID ERBB1 DOWNSTREAM PATHWAY		0.0	0.0	0.0	0.0	0.0	0.0	1.0	0.0	0.0	0.0	0.0	0.0	1.0	0.0	0.0	0.0	0.0	0.0	0.0	0.0
TACC3	10460	symbol	H. sapiens	10460	H. sapiens	TACC3	transforming acidic coiled-coil containing protein 3	GO:0007091 metaphase/anaphase transition of mitotic cell cycle;GO:0060236 regulation of mitotic spindle organization;GO:0021987 cerebral cortex development			Mitotic spindle(Enhanced)Centrosome;Cytosol;Microtubule organizing center(Supported)Vesicles(Approved)		(M242)PID AURORA A PATHWAY; (M71)PID ILK PATHWAY	(M5901)HALLMARK G2M CHECKPOINT; (M5925)HALLMARK E2F TARGETS	0.0	0.0	0.0	0.0	0.0	0.0	0.0	0.0	0.0	0.0	0.0	0.0	0.0	0.0	0.0	0.0	0.0	0.0	0.0	0.0
PPP1R12B	4660	symbol	H. sapiens	4660	H. sapiens	PPP1R12B	protein phosphatase 1 regulatory subunit 12B	GO:0006937 regulation of muscle contraction;GO:0000086 G2/M transition of mitotic cell cycle;GO:0044839 cell cycle G2/M phase transition			Actin filaments;Plasma membrane(Supported)				0.0	0.0	0.0	0.0	0.0	0.0	0.0	0.0	0.0	0.0	0.0	0.0	1.0	0.0	0.0	0.0	0.0	0.0	0.0	0.0
TMEM43	79188	symbol	H. sapiens	79188	H. sapiens	TMEM43	transmembrane protein 43	GO:0071763 nuclear membrane organization;GO:0006998 nuclear envelope organization;GO:0006997 nucleus organization							0.0	0.0	0.0	0.0	0.0	0.0	0.0	0.0	0.0	0.0	0.0	0.0	0.0	0.0	0.0	0.0	0.0	0.0	0.0	0.0
ARPC5	10092	symbol	H. sapiens	10092	H. sapiens	ARPC5	actin related protein 2/3 complex subunit 5	GO:0021769 orbitofrontal cortex development;GO:0034314 Arp2/3 complex-mediated actin nucleation;GO:0038096 Fc-gamma receptor signaling pathway involved in phagocytosis			Cell Junctions;Cytosol;Plasma membrane;Vesicles(Approved)	N-[2-(2-methyl-1H-indol-3-yl)ethyl]thiophene-2-carboxamide (Structural constituent of cytoskeleton);(2S)-2-(3-bromophenyl)-3-(5-chloro-2-hydroxyphenyl)-1,3-thiazolidin-4-one (Structural constituent of cytoskeleton)	(M278)PID RAC1 PATHWAY; (M81)PID CDC42 PATHWAY; (M164)PID ERBB1 DOWNSTREAM PATHWAY		1.0	0.0	0.0	0.0	0.0	0.0	1.0	0.0	0.0	0.0	0.0	0.0	1.0	0.0	0.0	0.0	0.0	0.0	0.0	0.0
HN1	4851	gene_synonym	H. sapiens	4851	H. sapiens	NOTCH1	notch 1	GO:0003270 Notch signaling pathway involved in regulation of secondary heart field cardioblast proliferation;GO:0072144 glomerular mesangial cell development;GO:1903849 positive regulation of aorta morphogenesis			Nucleoplasm(Approved)		(M70)PID PS1 PATHWAY; (M236)PID DELTA NP63 PATHWAY; (M288)PID HES HEY PATHWAY	(M5903)HALLMARK NOTCH SIGNALING; (M5895)HALLMARK WNT BETA CATENIN SIGNALING; (M5909)HALLMARK MYOGENESIS	1.0	1.0	0.0	1.0	1.0	0.0	0.0	0.0	1.0	0.0	1.0	0.0	0.0	0.0	0.0	0.0	1.0	0.0	0.0	0.0
STX16	8675	symbol	H. sapiens	8675	H. sapiens	STX16	syntaxin 16	GO:0090161 Golgi ribbon formation;GO:0042147 retrograde transport, endosome to Golgi;GO:0048278 vesicle docking			Vesicles(Enhanced)			(M5910)HALLMARK PROTEIN SECRETION	0.0	0.0	0.0	0.0	0.0	0.0	0.0	0.0	0.0	0.0	0.0	0.0	0.0	0.0	0.0	0.0	0.0	0.0	0.0	0.0
KLF16	83855	symbol	H. sapiens	83855	H. sapiens	KLF16	Kruppel like factor 16	GO:0007212 dopamine receptor signaling pathway;GO:0000122 negative regulation of transcription by RNA polymerase II;GO:0045892 negative regulation of transcription, DNA-templated		Transcription factors/Zinc-coordinating DNA-binding domains	Nucleus(Supported)				0.0	0.0	0.0	0.0	0.0	0.0	0.0	0.0	0.0	0.0	0.0	0.0	0.0	0.0	0.0	0.0	0.0	0.0	0.0	0.0
SLC25A44	9673	symbol	H. sapiens	9673	H. sapiens	SLC25A44	solute carrier family 25 member 44	GO:0006839 mitochondrial transport;GO:0055085 transmembrane transport;GO:0006810 transport		Transporters/Electrochemical Potential-driven transporters	Mitochondria;Nucleus(Approved)				0.0	0.0	0.0	0.0	0.0	0.0	0.0	0.0	0.0	0.0	0.0	0.0	0.0	0.0	0.0	0.0	0.0	0.0	0.0	0.0
WASF2	10163	symbol	H. sapiens	10163	H. sapiens	WASF2	WAS protein family member 2	GO:0051497 negative regulation of stress fiber assembly;GO:0038096 Fc-gamma receptor signaling pathway involved in phagocytosis;GO:0032232 negative regulation of actin filament bundle assembly			Cytosol;Plasma membrane(Approved)		(M156)PID ECADHERIN NASCENT AJ PATHWAY; (M278)PID RAC1 PATHWAY; (M164)PID ERBB1 DOWNSTREAM PATHWAY	(M5893)HALLMARK MITOTIC SPINDLE	0.0	0.0	0.0	0.0	0.0	0.0	1.0	0.0	0.0	0.0	0.0	0.0	1.0	0.0	1.0	0.0	1.0	0.0	0.0	0.0
ADD1	118	symbol	H. sapiens	118	H. sapiens	ADD1	adducin 1	GO:1903142 positive regulation of establishment of endothelial barrier;GO:0051016 barbed-end actin filament capping;GO:1901552 positive regulation of endothelial cell development			Nucleoplasm;Plasma membrane(Enhanced)			(M5902)HALLMARK APOPTOSIS; (M5945)HALLMARK HEME METABOLISM	0.0	0.0	0.0	0.0	0.0	0.0	0.0	0.0	0.0	0.0	0.0	0.0	0.0	0.0	1.0	0.0	0.0	0.0	0.0	0.0
CDV3	55573	symbol	H. sapiens	55573	H. sapiens	CDV3	CDV3 homolog	GO:0008283 cell proliferation;GO:0008150 biological_process			Cytosol;Nucleoli;Plasma membrane(Enhanced)				0.0	0.0	0.0	0.0	0.0	0.0	0.0	0.0	0.0	0.0	0.0	0.0	0.0	0.0	0.0	0.0	0.0	0.0	0.0	0.0
S100A12	6283	symbol	H. sapiens	6283	H. sapiens	S100A12	S100 calcium binding protein A12	GO:0030593 neutrophil chemotaxis;GO:0002548 monocyte chemotaxis;GO:0043312 neutrophil degranulation				Olopatadine (Zinc ion binding);Amlexanox (Zinc ion binding)	(M5883)NABA SECRETED FACTORS; (M5885)NABA MATRISOME ASSOCIATED; (M5889)NABA MATRISOME	(M5921)HALLMARK COMPLEMENT	1.0	0.0	0.0	1.0	0.0	0.0	0.0	0.0	0.0	1.0	0.0	0.0	0.0	0.0	0.0	0.0	0.0	0.0	0.0	0.0
CD302	9936	symbol	H. sapiens	9936	H. sapiens	CD302	CD302 molecule	GO:0006909 phagocytosis;GO:0006897 endocytosis;GO:0098657 import into cell		CD markers				(M5905)HALLMARK ADIPOGENESIS	0.0	0.0	0.0	0.0	0.0	0.0	0.0	0.0	0.0	0.0	0.0	0.0	0.0	0.0	0.0	0.0	0.0	0.0	0.0	0.0
LPIN2	9663	symbol	H. sapiens	9663	H. sapiens	LPIN2	lipin 2	GO:0006646 phosphatidylethanolamine biosynthetic process;GO:0019432 triglyceride biosynthetic process;GO:0006656 phosphatidylcholine biosynthetic process		Enzymes/ENZYME proteins/Hydrolases	Actin filaments;Cytosol;Plasma membrane(Supported)			(M5934)HALLMARK XENOBIOTIC METABOLISM; (M5945)HALLMARK HEME METABOLISM	0.0	0.0	0.0	0.0	0.0	0.0	0.0	0.0	0.0	0.0	0.0	0.0	1.0	0.0	0.0	0.0	0.0	0.0	0.0	0.0
C1RL	51279	symbol	H. sapiens	51279	H. sapiens	C1RL	complement C1r subcomponent like	GO:0006958 complement activation, classical pathway;GO:0002455 humoral immune response mediated by circulating immunoglobulin;GO:0016064 immunoglobulin mediated immune response		Enzymes/Peptidases/Serine-type peptidases	Cytosol;Microtubules(Approved)				0.0	0.0	0.0	0.0	0.0	0.0	1.0	0.0	0.0	0.0	0.0	0.0	0.0	0.0	0.0	0.0	0.0	0.0	0.0	1.0
CBL	867	symbol	H. sapiens	867	H. sapiens	CBL	Cbl proto-oncogene	GO:0035635 entry of bacterium into host cell;GO:0007175 negative regulation of epidermal growth factor-activated receptor activity;GO:0090650 cellular response to oxygen-glucose deprivation		Enzymes/ENZYME proteins/Transferases	Cytosol(Supported)		(M273)PID EPHA2 FWD PATHWAY; (M226)PID VEGFR1 PATHWAY; (M252)PID IL8 CXCR1 PATHWAY	(M5897)HALLMARK IL6 JAK STAT3 SIGNALING; (M5953)HALLMARK KRAS SIGNALING UP	1.0	0.0	1.0	0.0	0.0	0.0	0.0	0.0	0.0	1.0	0.0	0.0	0.0	0.0	0.0	0.0	1.0	0.0	0.0	0.0
TNRC6B	23112	symbol	H. sapiens	23112	H. sapiens	TNRC6B	trinucleotide repeat containing 6B	GO:0060213 positive regulation of nuclear-transcribed mRNA poly(A) tail shortening;GO:0060211 regulation of nuclear-transcribed mRNA poly(A) tail shortening;GO:1900153 positive regulation of nuclear-transcribed mRNA catabolic process, deadenylation-dependent decay						(M5945)HALLMARK HEME METABOLISM	0.0	1.0	0.0	0.0	0.0	0.0	0.0	0.0	0.0	0.0	0.0	0.0	1.0	0.0	1.0	0.0	0.0	0.0	0.0	0.0
CAT	847	symbol	H. sapiens	847	H. sapiens	CAT	catalase	GO:0033591 response to L-ascorbic acid;GO:0033197 response to vitamin E;GO:0001657 ureteric bud development		Enzymes/ENZYME proteins/Oxidoreductases	Cytosol;Vesicles(Supported)	Fomepizole (Receptor binding)	(M136)PID FOXO PATHWAY	(M5938)HALLMARK REACTIVE OXIGEN SPECIES PATHWAY; (M5949)HALLMARK PEROXISOME; (M5948)HALLMARK BILE ACID METABOLISM	1.0	0.0	0.0	0.0	0.0	0.0	0.0	0.0	0.0	0.0	0.0	0.0	1.0	0.0	0.0	0.0	0.0	1.0	0.0	0.0
PLP2	5355	symbol	H. sapiens	5355	H. sapiens	PLP2	proteolipid protein 2	GO:0019221 cytokine-mediated signaling pathway;GO:0006935 chemotaxis;GO:0071345 cellular response to cytokine stimulus		Transporters/Transporter channels and pores					0.0	0.0	0.0	0.0	0.0	0.0	0.0	0.0	0.0	1.0	0.0	0.0	0.0	0.0	0.0	0.0	0.0	0.0	0.0	0.0
ARHGEF11	9826	symbol	H. sapiens	9826	H. sapiens	ARHGEF11	Rho guanine nucleotide exchange factor 11	GO:0035023 regulation of Rho protein signal transduction;GO:0006941 striated muscle contraction;GO:0007266 Rho protein signal transduction			Golgi apparatus;Plasma membrane(Approved)		(M12645)ST GA13 PATHWAY; (M5193)SIG CHEMOTAXIS; (M68)PID RHOA REG PATHWAY	(M5893)HALLMARK MITOTIC SPINDLE	0.0	0.0	0.0	0.0	0.0	0.0	0.0	0.0	1.0	0.0	0.0	0.0	1.0	0.0	0.0	0.0	0.0	0.0	0.0	0.0
ST8SIA4	7903	symbol	H. sapiens	7903	H. sapiens	ST8SIA4	ST8 alpha-N-acetyl-neuraminide alpha-2,8-sialyltransferase 4	GO:0001574 ganglioside biosynthetic process;GO:0006688 glycosphingolipid biosynthetic process;GO:0001573 ganglioside metabolic process			Golgi apparatus(Approved)			(M5913)HALLMARK INTERFERON GAMMA RESPONSE; (M5950)HALLMARK ALLOGRAFT REJECTION	0.0	0.0	0.0	0.0	0.0	0.0	0.0	0.0	0.0	0.0	0.0	0.0	0.0	0.0	0.0	0.0	0.0	0.0	0.0	0.0
ZNF106	64397	symbol	H. sapiens	64397	H. sapiens	ZNF106	zinc finger protein 106	GO:0008286 insulin receptor signaling pathway;GO:0032869 cellular response to insulin stimulus;GO:0032868 response to insulin			Cytosol;Nucleoli;Nucleus(Approved)				0.0	0.0	0.0	0.0	0.0	0.0	0.0	0.0	0.0	0.0	0.0	0.0	0.0	0.0	0.0	0.0	0.0	0.0	0.0	0.0
SLC9A3R1	9368	symbol	H. sapiens	9368	H. sapiens	SLC9A3R1	SLC9A3 regulator 1	GO:0032416 negative regulation of sodium:proton antiporter activity;GO:0060088 auditory receptor cell stereocilium organization;GO:0032415 regulation of sodium:proton antiporter activity		Transporters/Accessory Factors Involved in Transport	Microtubule organizing center;Plasma membrane;Vesicles(Approved)		(M99)PID TXA2PATHWAY; (M5493)WNT SIGNALING; (M186)PID PDGFRB PATHWAY	(M5907)HALLMARK ESTROGEN RESPONSE LATE; (M5906)HALLMARK ESTROGEN RESPONSE EARLY; (M5924)HALLMARK MTORC1 SIGNALING	0.0	0.0	0.0	0.0	0.0	0.0	0.0	0.0	1.0	0.0	0.0	0.0	0.0	0.0	0.0	0.0	0.0	0.0	0.0	0.0
PISD	23761	symbol	H. sapiens	23761	H. sapiens	PISD	phosphatidylserine decarboxylase	GO:0008654 phospholipid biosynthetic process;GO:0006644 phospholipid metabolic process;GO:0090407 organophosphate biosynthetic process		Enzymes/ENZYME proteins/Lyases	Cytosol;Golgi apparatus(Approved)	Phosphatidyl serine (Phosphatidylserine decarboxylase activity)	(M285)PID HNF3A PATHWAY		0.0	0.0	0.0	0.0	0.0	0.0	0.0	0.0	0.0	0.0	0.0	0.0	0.0	0.0	0.0	0.0	0.0	0.0	0.0	0.0
SETD1B	23067	symbol	H. sapiens	23067	H. sapiens	SETD1B	SET domain containing 1B	GO:0051568 histone H3-K4 methylation;GO:0034968 histone lysine methylation;GO:0016571 histone methylation		Enzymes/ENZYME proteins/Transferases	Nucleoplasm(Enhanced)				0.0	0.0	0.0	0.0	0.0	0.0	0.0	1.0	0.0	0.0	0.0	0.0	0.0	0.0	0.0	0.0	0.0	0.0	0.0	0.0
FLI1	2313	symbol	H. sapiens	2313	H. sapiens	FLI1	Fli-1 proto-oncogene, ETS transcription factor	GO:0035855 megakaryocyte development;GO:0098751 bone cell development;GO:0030219 megakaryocyte differentiation		Transcription factors/Helix-turn-helix domains	Nuclear bodies;Nucleus(Supported)				0.0	0.0	0.0	0.0	0.0	0.0	0.0	0.0	0.0	0.0	0.0	1.0	0.0	0.0	1.0	0.0	0.0	0.0	0.0	0.0
HDAC7	51564	symbol	H. sapiens	51564	H. sapiens	HDAC7	histone deacetylase 7	GO:0090050 positive regulation of cell migration involved in sprouting angiogenesis;GO:1903672 positive regulation of sprouting angiogenesis;GO:0090049 regulation of cell migration involved in sprouting angiogenesis		Enzymes/ENZYME proteins/Hydrolases	Cytosol(Supported)	7-[4-(Dimethylamino)Phenyl]-N-Hydroxy-4,6-Dimethyl-7-Oxo-2,4-Heptadienamide (Transcription corepressor activity)	(M30)PID HDAC CLASSII PATHWAY; (M151)PID AR TF PATHWAY; (M255)PID HIF1 TFPATHWAY		0.0	0.0	0.0	1.0	0.0	0.0	0.0	1.0	0.0	0.0	0.0	0.0	0.0	0.0	0.0	0.0	0.0	0.0	0.0	0.0
ZNF641	121274	symbol	H. sapiens	121274	H. sapiens	ZNF641	zinc finger protein 641	GO:0006357 regulation of transcription by RNA polymerase II;GO:0006366 transcription by RNA polymerase II;GO:0006355 regulation of transcription, DNA-templated		Transcription factors/Zinc-coordinating DNA-binding domains	Nucleoplasm(Supported)				0.0	0.0	0.0	0.0	0.0	0.0	0.0	0.0	0.0	0.0	0.0	0.0	0.0	0.0	0.0	0.0	0.0	0.0	0.0	0.0
MARK2	2011	symbol	H. sapiens	2011	H. sapiens	MARK2	microtubule affinity regulating kinase 2	GO:0050770 regulation of axonogenesis;GO:0045197 establishment or maintenance of epithelial cell apical/basal polarity;GO:0010976 positive regulation of neuron projection development	CAMK Ser/Thr protein kinase family	Enzymes/{ENZYME proteins/Transferases,Kinases/CAMK Ser/Thr protein kinases}	Plasma membrane(Supported)Nucleoplasm(Approved)		(M87)PID LKB1 PATHWAY; (M17)PID NOTCH PATHWAY	(M5941)HALLMARK UV RESPONSE UP	0.0	0.0	0.0	0.0	0.0	0.0	0.0	0.0	0.0	0.0	0.0	0.0	0.0	0.0	0.0	0.0	0.0	0.0	0.0	0.0
FCN1	2219	symbol	H. sapiens	2219	H. sapiens	FCN1	ficolin 1	GO:0002752 cell surface pattern recognition receptor signaling pathway;GO:0046597 negative regulation of viral entry into host cell;GO:2000484 positive regulation of interleukin-8 secretion					(M5880)NABA ECM AFFILIATED; (M5885)NABA MATRISOME ASSOCIATED; (M5889)NABA MATRISOME	(M5921)HALLMARK COMPLEMENT	1.0	0.0	0.0	1.0	0.0	0.0	1.0	0.0	0.0	0.0	0.0	0.0	0.0	0.0	0.0	0.0	1.0	0.0	0.0	0.0
GPR27	2850	symbol	H. sapiens	2850	H. sapiens	GPR27	G protein-coupled receptor 27	GO:0035774 positive regulation of insulin secretion involved in cellular response to glucose stimulus;GO:1900738 positive regulation of phospholipase C-activating G-protein coupled receptor signaling pathway;GO:0061178 regulation of insulin secretion involved in cellular response to glucose stimulus		G-protein coupled receptors/GPCRs excl olfactory receptors	Actin filaments;Cytosol;Nucleoplasm;Plasma membrane(Approved)				0.0	0.0	0.0	0.0	0.0	0.0	0.0	0.0	0.0	0.0	0.0	0.0	0.0	0.0	0.0	0.0	0.0	0.0	0.0	0.0
XRCC5	7520	symbol	H. sapiens	7520	H. sapiens	XRCC5	X-ray repair cross complementing 5	GO:1904430 negative regulation of t-circle formation;GO:0075713 establishment of integrated proviral latency;GO:1904429 regulation of t-circle formation			Nucleoplasm(Enhanced)		(M42)PID DNA PK PATHWAY; (M258)PID BARD1 PATHWAY; (M58)PID AR PATHWAY	(M5908)HALLMARK ANDROGEN RESPONSE	1.0	0.0	0.0	1.0	0.0	0.0	1.0	0.0	0.0	0.0	0.0	0.0	0.0	0.0	0.0	0.0	1.0	0.0	0.0	0.0
RAB37	326624	symbol	H. sapiens	326624	H. sapiens	RAB37	RAB37, member RAS oncogene family	GO:0043312 neutrophil degranulation;GO:0006904 vesicle docking involved in exocytosis;GO:0002283 neutrophil activation involved in immune response							1.0	0.0	0.0	0.0	0.0	0.0	0.0	0.0	0.0	0.0	0.0	0.0	0.0	0.0	0.0	0.0	0.0	0.0	0.0	0.0
MRVI1	10335	symbol	H. sapiens	10335	H. sapiens	MRVI1	murine retrovirus integration site 1 homolog				Cytosol;Nuclear bodies(Approved)				0.0	0.0	0.0	0.0	0.0	0.0	0.0	0.0	0.0	0.0	0.0	0.0	0.0	0.0	0.0	0.0	0.0	0.0	0.0	0.0
AHNAK	79026	symbol	H. sapiens	79026	H. sapiens	AHNAK	AHNAK nucleoprotein	GO:1901385 regulation of voltage-gated calcium channel activity;GO:1901019 regulation of calcium ion transmembrane transporter activity;GO:1903169 regulation of calcium ion transmembrane transport			Cytosol;Plasma membrane(Supported)			(M5947)HALLMARK IL2 STAT5 SIGNALING	0.0	0.0	0.0	0.0	0.0	0.0	0.0	0.0	0.0	0.0	0.0	0.0	0.0	0.0	0.0	0.0	0.0	1.0	0.0	0.0
HSD17B11	51170	symbol	H. sapiens	51170	H. sapiens	HSD17B11	hydroxysteroid 17-beta dehydrogenase 11	GO:0006710 androgen catabolic process;GO:0006703 estrogen biosynthetic process;GO:0008210 estrogen metabolic process		Enzymes/ENZYME proteins/Oxidoreductases	Lipid droplets(Supported)	Aetiocholanolone (Steroid dehydrogenase activity)		(M5949)HALLMARK PEROXISOME; (M5948)HALLMARK BILE ACID METABOLISM; (M5935)HALLMARK FATTY ACID METABOLISM	0.0	0.0	0.0	0.0	0.0	0.0	0.0	0.0	0.0	0.0	0.0	0.0	0.0	0.0	0.0	0.0	0.0	0.0	0.0	0.0
CDC123	8872	symbol	H. sapiens	8872	H. sapiens	CDC123	cell division cycle 123	GO:1905143 eukaryotic translation initiation factor 2 complex assembly;GO:0045948 positive regulation of translational initiation;GO:0006446 regulation of translational initiation			Cytosol;Golgi apparatus;Nucleoplasm(Approved)				0.0	0.0	0.0	0.0	0.0	0.0	0.0	0.0	0.0	0.0	0.0	0.0	0.0	0.0	0.0	0.0	0.0	0.0	0.0	0.0
CKLF	51192	symbol	H. sapiens	51192	H. sapiens	CKLF	chemokine like factor	GO:0048246 macrophage chemotaxis;GO:0030593 neutrophil chemotaxis;GO:1905517 macrophage migration			Vesicles(Approved)				0.0	0.0	0.0	0.0	0.0	0.0	0.0	0.0	0.0	0.0	0.0	0.0	0.0	0.0	0.0	0.0	0.0	0.0	0.0	0.0
UBXN2B	137886	symbol	H. sapiens	137886	H. sapiens	UBXN2B	UBX domain protein 2B	GO:0031468 nuclear envelope reassembly;GO:0043666 regulation of phosphoprotein phosphatase activity;GO:0000045 autophagosome assembly			Nucleoplasm(Approved)				0.0	0.0	0.0	0.0	0.0	0.0	0.0	0.0	0.0	0.0	0.0	0.0	0.0	0.0	0.0	0.0	0.0	0.0	0.0	0.0
FLII	2314	symbol	H. sapiens	2314	H. sapiens	FLII	FLII, actin remodeling protein	GO:0051014 actin filament severing;GO:0030036 actin cytoskeleton organization;GO:0030029 actin filament-based process			Cytosol;Microtubule organizing center;Nucleoplasm(Supported)			(M5909)HALLMARK MYOGENESIS	0.0	0.0	0.0	0.0	0.0	0.0	0.0	0.0	0.0	0.0	0.0	0.0	0.0	0.0	0.0	0.0	0.0	0.0	0.0	0.0
RAB5B	5869	symbol	H. sapiens	5869	H. sapiens	RAB5B	RAB5B, member RAS oncogene family	GO:0048227 plasma membrane to endosome transport;GO:0043312 neutrophil degranulation;GO:0002283 neutrophil activation involved in immune response		RAS pathway related proteins	Vesicles(Supported)				1.0	0.0	0.0	0.0	0.0	0.0	0.0	0.0	0.0	0.0	0.0	0.0	0.0	0.0	0.0	0.0	0.0	0.0	0.0	0.0
CLEC2B	9976	symbol	H. sapiens	9976	H. sapiens	CLEC2B	C-type lectin domain family 2 member B	GO:0050776 regulation of immune response;GO:0002682 regulation of immune system process;GO:0006955 immune response					(M5880)NABA ECM AFFILIATED; (M5885)NABA MATRISOME ASSOCIATED; (M5889)NABA MATRISOME		0.0	0.0	1.0	0.0	0.0	1.0	0.0	0.0	0.0	0.0	0.0	0.0	0.0	0.0	0.0	0.0	0.0	0.0	0.0	0.0
BTN3A1	11119	symbol	H. sapiens	11119	H. sapiens	BTN3A1	butyrophilin subfamily 3 member A1	GO:0072643 interferon-gamma secretion;GO:0050852 T cell receptor signaling pathway;GO:0050798 activated T cell proliferation		CD markers	Vesicles(Uncertain)				0.0	1.0	1.0	1.0	0.0	0.0	1.0	0.0	0.0	0.0	0.0	0.0	0.0	1.0	0.0	0.0	0.0	0.0	0.0	1.0
RBCK1	10616	symbol	H. sapiens	10616	H. sapiens	RBCK1	RANBP2-type and C3HC4-type zinc finger containing 1	GO:0042346 positive regulation of NF-kappaB import into nucleus;GO:0060546 negative regulation of necroptotic process;GO:0042345 regulation of NF-kappaB import into nucleus		Enzymes/ENZYME proteins/Transferases				(M5913)HALLMARK INTERFERON GAMMA RESPONSE; (M5937)HALLMARK GLYCOLYSIS	0.0	0.0	1.0	0.0	0.0	0.0	1.0	0.0	1.0	1.0	0.0	0.0	0.0	0.0	0.0	0.0	1.0	0.0	0.0	0.0
CEACAM4	1089	symbol	H. sapiens	1089	H. sapiens	CEACAM4	carcinoembryonic antigen related cell adhesion molecule 4	GO:0006909 phagocytosis;GO:0006897 endocytosis;GO:0098657 import into cell							0.0	0.0	0.0	0.0	0.0	0.0	0.0	0.0	0.0	0.0	0.0	0.0	0.0	0.0	0.0	0.0	0.0	0.0	0.0	0.0
ATF6	22926	symbol	H. sapiens	22926	H. sapiens	ATF6	activating transcription factor 6	GO:0006990 positive regulation of transcription from RNA polymerase II promoter involved in unfolded protein response;GO:0036500 ATF6-mediated unfolded protein response;GO:1990440 positive regulation of transcription from RNA polymerase II promoter in response to endoplasmic reticulum stress		Transcription factors/Basic domains	Cytosol(Approved)		(M229)PID P38 ALPHA BETA DOWNSTREAM PATHWAY	(M5922)HALLMARK UNFOLDED PROTEIN RESPONSE	0.0	0.0	0.0	0.0	0.0	0.0	0.0	0.0	1.0	0.0	0.0	0.0	0.0	0.0	0.0	0.0	0.0	0.0	0.0	0.0
ZBTB34	403341	symbol	H. sapiens	403341	H. sapiens	ZBTB34	zinc finger and BTB domain containing 34	GO:0006355 regulation of transcription, DNA-templated;GO:1903506 regulation of nucleic acid-templated transcription;GO:0006351 transcription, DNA-templated		Transcription factors/Zinc-coordinating DNA-binding domains	Nucleoplasm(Supported)				0.0	0.0	0.0	0.0	0.0	0.0	0.0	0.0	0.0	0.0	0.0	0.0	0.0	0.0	0.0	0.0	0.0	0.0	0.0	0.0
DGCR2	9993	symbol	H. sapiens	9993	H. sapiens	DGCR2	DiGeorge syndrome critical region gene 2	GO:0050890 cognition;GO:0009887 animal organ morphogenesis;GO:0007155 cell adhesion			Nuclear bodies;Nucleoplasm(Approved)				0.0	0.0	0.0	0.0	0.0	0.0	0.0	0.0	0.0	0.0	0.0	0.0	0.0	0.0	0.0	0.0	0.0	0.0	0.0	0.0
RAB3D	9545	symbol	H. sapiens	9545	H. sapiens	RAB3D	RAB3D, member RAS oncogene family	GO:0018125 peptidyl-cysteine methylation;GO:1903307 positive regulation of regulated secretory pathway;GO:0043312 neutrophil degranulation			Vesicles(Approved)				1.0	0.0	0.0	0.0	0.0	0.0	0.0	0.0	0.0	0.0	0.0	0.0	0.0	0.0	0.0	0.0	0.0	0.0	0.0	0.0
APAF1	317	symbol	H. sapiens	317	H. sapiens	APAF1	apoptotic peptidase activating factor 1	GO:0072432 response to G1 DNA damage checkpoint signaling;GO:0008635 activation of cysteine-type endopeptidase activity involved in apoptotic process by cytochrome c;GO:1902510 regulation of apoptotic DNA fragmentation			Cytosol;Golgi apparatus;Nucleoplasm(Approved)	Adenosine triphosphate (Nucleotide binding)	(M13096)SA PROGRAMMED CELL DEATH; (M7997)SA CASPASE CASCADE; (M197)PID HIV NEF PATHWAY	(M5939)HALLMARK P53 PATHWAY	1.0	0.0	0.0	0.0	0.0	0.0	0.0	0.0	1.0	0.0	0.0	0.0	0.0	0.0	0.0	0.0	0.0	1.0	0.0	0.0
ACOX1	51	symbol	H. sapiens	51	H. sapiens	ACOX1	acyl-CoA oxidase 1	GO:0033540 fatty acid beta-oxidation using acyl-CoA oxidase;GO:0036109 alpha-linolenic acid metabolic process;GO:0033539 fatty acid beta-oxidation using acyl-CoA dehydrogenase		Enzymes/ENZYME proteins/Oxidoreductases	Vesicles(Enhanced)Nucleus(Approved)	Flavin adenine dinucleotide (Receptor binding);(3R)-3-HYDROXYDODECANOIC ACID (Receptor binding)		(M5949)HALLMARK PEROXISOME; (M5935)HALLMARK FATTY ACID METABOLISM; (M5905)HALLMARK ADIPOGENESIS	0.0	0.0	0.0	0.0	0.0	0.0	0.0	0.0	0.0	0.0	0.0	0.0	0.0	0.0	0.0	0.0	0.0	0.0	0.0	0.0
RAB27A	5873	symbol	H. sapiens	5873	H. sapiens	RAB27A	RAB27A, member RAS oncogene family	GO:1903435 positive regulation of constitutive secretory pathway;GO:0043316 cytotoxic T cell degranulation;GO:1903433 regulation of constitutive secretory pathway						(M5941)HALLMARK UV RESPONSE UP	1.0	1.0	0.0	0.0	0.0	0.0	0.0	0.0	0.0	0.0	0.0	0.0	0.0	0.0	0.0	1.0	0.0	0.0	0.0	1.0
CPEB2	132864	symbol	H. sapiens	132864	H. sapiens	CPEB2	cytoplasmic polyadenylation element binding protein 2	GO:1900248 negative regulation of cytoplasmic translational elongation;GO:0045900 negative regulation of translational elongation;GO:2000766 negative regulation of cytoplasmic translation			Cytosol(Approved)			(M5892)HALLMARK CHOLESTEROL HOMEOSTASIS	0.0	0.0	0.0	0.0	0.0	0.0	0.0	0.0	0.0	0.0	0.0	0.0	0.0	0.0	0.0	0.0	0.0	0.0	0.0	0.0
TM9SF2	9375	symbol	H. sapiens	9375	H. sapiens	TM9SF2	transmembrane 9 superfamily member 2			Transporters/Accessory Factors Involved in Transport					0.0	0.0	0.0	0.0	0.0	0.0	0.0	0.0	0.0	0.0	0.0	0.0	0.0	0.0	0.0	0.0	0.0	0.0	0.0	0.0
PRELID1	27166	symbol	H. sapiens	27166	H. sapiens	PRELID1	PRELI domain containing 1	GO:0070234 positive regulation of T cell apoptotic process;GO:2001140 positive regulation of phospholipid transport;GO:1901857 positive regulation of cellular respiration			Mitochondria;Nucleoplasm(Supported)				0.0	1.0	0.0	0.0	0.0	0.0	0.0	0.0	1.0	0.0	0.0	0.0	0.0	0.0	0.0	0.0	0.0	0.0	0.0	0.0
GZF1	64412	symbol	H. sapiens	64412	H. sapiens	GZF1	GDNF inducible zinc finger protein 1	GO:0001658 branching involved in ureteric bud morphogenesis;GO:0060675 ureteric bud morphogenesis;GO:0072171 mesonephric tubule morphogenesis		Transcription factors/Zinc-coordinating DNA-binding domains	Nucleoli;Nucleus(Supported)				0.0	0.0	0.0	0.0	0.0	0.0	0.0	0.0	0.0	0.0	0.0	0.0	0.0	0.0	0.0	0.0	0.0	0.0	0.0	0.0
DDX58	23586	symbol	H. sapiens	23586	H. sapiens	DDX58	DExD/H-box helicase 58	GO:0035549 positive regulation of interferon-beta secretion;GO:1902741 positive regulation of interferon-alpha secretion;GO:0039529 RIG-I signaling pathway		Enzymes/ENZYME proteins/Hydrolases	Cytosol(Supported)			(M5913)HALLMARK INTERFERON GAMMA RESPONSE; (M5890)HALLMARK TNFA SIGNALING VIA NFKB	0.0	0.0	0.0	1.0	0.0	0.0	1.0	0.0	0.0	1.0	0.0	0.0	0.0	0.0	0.0	0.0	1.0	0.0	0.0	1.0
EIF4E3	317649	symbol	H. sapiens	317649	H. sapiens	EIF4E3	eukaryotic translation initiation factor 4E family member 3	GO:0006413 translational initiation;GO:0006417 regulation of translation;GO:0034248 regulation of cellular amide metabolic process			Nucleoli fibrillar center(Approved)			(M5913)HALLMARK INTERFERON GAMMA RESPONSE	0.0	0.0	0.0	0.0	0.0	0.0	0.0	0.0	0.0	1.0	0.0	0.0	0.0	0.0	0.0	0.0	0.0	0.0	0.0	0.0
ITGA5	3678	symbol	H. sapiens	3678	H. sapiens	ITGA5	integrin subunit alpha 5	GO:0035313 wound healing, spreading of epidermal cells;GO:1903672 positive regulation of sprouting angiogenesis;GO:0030949 positive regulation of vascular endothelial growth factor receptor signaling pathway		CD markers			(M274)PID LYMPH ANGIOGENESIS PATHWAY; (M47)PID INTEGRIN CS PATHWAY; (M165)PID SYNDECAN 4 PATHWAY	(M5932)HALLMARK INFLAMMATORY RESPONSE; (M5930)HALLMARK EPITHELIAL MESENCHYMAL TRANSITION	0.0	1.0	0.0	0.0	0.0	0.0	0.0	0.0	0.0	0.0	0.0	0.0	0.0	0.0	0.0	0.0	1.0	0.0	1.0	0.0
HLX	3142	symbol	H. sapiens	3142	H. sapiens	HLX	H2.0 like homeobox	GO:0045629 negative regulation of T-helper 2 cell differentiation;GO:0045627 positive regulation of T-helper 1 cell differentiation;GO:0045625 regulation of T-helper 1 cell differentiation		Transcription factors/Helix-turn-helix domains	Cytosol;Nucleoplasm(Approved)		(M54)PID IL12 2PATHWAY		1.0	1.0	0.0	0.0	1.0	0.0	1.0	0.0	0.0	0.0	1.0	0.0	0.0	0.0	0.0	1.0	0.0	0.0	0.0	1.0
RBL2	5934	symbol	H. sapiens	5934	H. sapiens	RBL2	RB transcriptional corepressor like 2	GO:0006977 DNA damage response, signal transduction by p53 class mediator resulting in cell cycle arrest;GO:0072431 signal transduction involved in mitotic G1 DNA damage checkpoint;GO:0031571 mitotic G1 DNA damage checkpoint			Cytosol;Nucleoli;Nucleus(Approved)		(M12771)SA PTEN PATHWAY; (M136)PID FOXO PATHWAY; (M40)PID E2F PATHWAY		0.0	0.0	0.0	0.0	0.0	0.0	0.0	1.0	0.0	0.0	0.0	0.0	1.0	0.0	0.0	0.0	0.0	0.0	0.0	0.0
ARHGEF40	55701	symbol	H. sapiens	55701	H. sapiens	ARHGEF40	Rho guanine nucleotide exchange factor 40	GO:0035023 regulation of Rho protein signal transduction;GO:0007266 Rho protein signal transduction;GO:0046578 regulation of Ras protein signal transduction							0.0	0.0	0.0	0.0	0.0	0.0	0.0	0.0	0.0	0.0	0.0	0.0	1.0	0.0	0.0	0.0	0.0	0.0	0.0	0.0
OGT	8473	symbol	H. sapiens	8473	H. sapiens	OGT	O-linked N-acetylglucosamine (GlcNAc) transferase	GO:0061087 positive regulation of histone H3-K27 methylation;GO:0090526 regulation of gluconeogenesis involved in cellular glucose homeostasis;GO:0032435 negative regulation of proteasomal ubiquitin-dependent protein catabolic process		Enzymes/ENZYME proteins/Transferases	Nucleoplasm;Plasma membrane(Supported)				0.0	0.0	1.0	0.0	0.0	0.0	0.0	1.0	1.0	0.0	0.0	0.0	0.0	0.0	0.0	0.0	0.0	0.0	0.0	0.0
PPP2R5A	5525	symbol	H. sapiens	5525	H. sapiens	PPP2R5A	protein phosphatase 2 regulatory subunit B'alpha	GO:0090219 negative regulation of lipid kinase activity;GO:1903077 negative regulation of protein localization to plasma membrane;GO:1904376 negative regulation of protein localization to cell periphery			Cytosol(Supported)		(M90)PID WNT CANONICAL PATHWAY; (M139)PID MYC PATHWAY; (M236)PID DELTA NP63 PATHWAY		0.0	0.0	1.0	0.0	0.0	0.0	0.0	0.0	0.0	0.0	1.0	0.0	1.0	0.0	0.0	0.0	0.0	0.0	0.0	0.0
ACIN1	22985	symbol	H. sapiens	22985	H. sapiens	ACIN1	apoptotic chromatin condensation inducer 1	GO:0045657 positive regulation of monocyte differentiation;GO:0030263 apoptotic chromosome condensation;GO:0045655 regulation of monocyte differentiation		Transporters/Primary Active Transporters	Nucleoplasm(Supported)Cytosol;Plasma membrane(Uncertain)				0.0	1.0	0.0	0.0	0.0	0.0	0.0	0.0	0.0	0.0	0.0	0.0	0.0	0.0	1.0	0.0	0.0	0.0	0.0	0.0
ANXA3	306	symbol	H. sapiens	306	H. sapiens	ANXA3	annexin A3	GO:0010595 positive regulation of endothelial cell migration;GO:0021766 hippocampus development;GO:0045766 positive regulation of angiogenesis			Cytosol(Supported)	Ethanolamine (Phospholipase a2 inhibitor activity)	(M5880)NABA ECM AFFILIATED; (M5885)NABA MATRISOME ASSOCIATED; (M5889)NABA MATRISOME		1.0	0.0	0.0	0.0	0.0	0.0	0.0	0.0	0.0	0.0	0.0	0.0	0.0	0.0	0.0	0.0	0.0	0.0	0.0	0.0
MFSD14B	84641	symbol	H. sapiens	84641	H. sapiens	MFSD14B	major facilitator superfamily domain containing 14B	GO:0055085 transmembrane transport;GO:0006810 transport;GO:0051234 establishment of localization		Transporters/Electrochemical Potential-driven transporters	Cytosol;Nucleoplasm(Approved)				0.0	0.0	0.0	0.0	0.0	0.0	0.0	0.0	0.0	0.0	0.0	0.0	0.0	0.0	0.0	0.0	0.0	0.0	0.0	0.0
NBR1	4077	symbol	H. sapiens	4077	H. sapiens	NBR1	NBR1, autophagy cargo receptor	GO:0045668 negative regulation of osteoblast differentiation;GO:0030500 regulation of bone mineralization;GO:0070167 regulation of biomineral tissue development			Vesicles(Supported)Nuclear bodies;Nucleoplasm(Approved)				0.0	0.0	0.0	0.0	0.0	0.0	0.0	0.0	0.0	0.0	0.0	0.0	0.0	0.0	0.0	0.0	0.0	1.0	0.0	0.0
MOSPD2	158747	symbol	H. sapiens	158747	H. sapiens	MOSPD2	motile sperm domain containing 2	GO:0090023 positive regulation of neutrophil chemotaxis;GO:0090026 positive regulation of monocyte chemotaxis;GO:0071624 positive regulation of granulocyte chemotaxis			Endoplasmic reticulum(Approved)				1.0	0.0	0.0	1.0	0.0	0.0	0.0	0.0	0.0	0.0	0.0	0.0	0.0	0.0	0.0	0.0	0.0	0.0	0.0	0.0
IL18RAP	8807	symbol	H. sapiens	8807	H. sapiens	IL18RAP	interleukin 18 receptor accessory protein	GO:0035744 T-helper 1 cell cytokine production;GO:0045954 positive regulation of natural killer cell mediated cytotoxicity;GO:0035655 interleukin-18-mediated signaling pathway		CD markers			(M290)PID IL12 STAT4 PATHWAY; (M196)PID IL23 PATHWAY; (M54)PID IL12 2PATHWAY	(M5950)HALLMARK ALLOGRAFT REJECTION; (M5932)HALLMARK INFLAMMATORY RESPONSE	1.0	0.0	0.0	1.0	0.0	0.0	1.0	0.0	0.0	1.0	1.0	0.0	0.0	1.0	0.0	0.0	0.0	0.0	0.0	1.0
CEACAM3	1084	symbol	H. sapiens	1084	H. sapiens	CEACAM3	carcinoembryonic antigen related cell adhesion molecule 3	GO:0043312 neutrophil degranulation;GO:0002283 neutrophil activation involved in immune response;GO:0042119 neutrophil activation		CD markers					1.0	0.0	0.0	0.0	0.0	0.0	0.0	0.0	0.0	0.0	0.0	0.0	0.0	0.0	0.0	0.0	0.0	0.0	0.0	0.0
TNFSF13B	10673	symbol	H. sapiens	10673	H. sapiens	TNFSF13B	TNF superfamily member 13b	GO:0031296 B cell costimulation;GO:0002636 positive regulation of germinal center formation;GO:0002634 regulation of germinal center formation		CD markers		1,4-Diethylene Dioxide (Receptor binding);Citric Acid (Receptor binding);Belimumab (Receptor binding)	(M5883)NABA SECRETED FACTORS; (M5885)NABA MATRISOME ASSOCIATED; (M5889)NABA MATRISOME		0.0	1.0	0.0	0.0	0.0	0.0	1.0	0.0	0.0	1.0	1.0	0.0	0.0	0.0	0.0	0.0	0.0	0.0	0.0	1.0
GIMAP4	55303	symbol	H. sapiens	55303	H. sapiens	GIMAP4	GTPase, IMAP family member 4								0.0	0.0	0.0	0.0	0.0	0.0	0.0	0.0	0.0	0.0	0.0	0.0	0.0	0.0	0.0	0.0	0.0	0.0	0.0	0.0
OSCAR	126014	symbol	H. sapiens	126014	H. sapiens	OSCAR	osteoclast associated, immunoglobulin-like receptor	GO:0043312 neutrophil degranulation;GO:0002283 neutrophil activation involved in immune response;GO:0042119 neutrophil activation							1.0	0.0	1.0	0.0	0.0	1.0	0.0	0.0	0.0	0.0	0.0	0.0	0.0	0.0	0.0	0.0	0.0	0.0	0.0	0.0
PSMB9	5698	symbol	H. sapiens	5698	H. sapiens	PSMB9	proteasome subunit beta 9	GO:0002223 stimulatory C-type lectin receptor signaling pathway;GO:0002479 antigen processing and presentation of exogenous peptide antigen via MHC class I, TAP-dependent;GO:0002220 innate immune response activating cell surface receptor signaling pathway		Enzymes/{ENZYME proteins/Hydrolases,Peptidases/Threonine-type peptidases}	Cytosol(Supported)	Carfilzomib (Threonine-type endopeptidase activity)		(M5911)HALLMARK INTERFERON ALPHA RESPONSE; (M5921)HALLMARK COMPLEMENT; (M5913)HALLMARK INTERFERON GAMMA RESPONSE	0.0	1.0	1.0	1.0	0.0	0.0	1.0	0.0	1.0	1.0	1.0	0.0	1.0	0.0	0.0	0.0	1.0	0.0	0.0	0.0
NUP50	10762	symbol	H. sapiens	10762	H. sapiens	NUP50	nucleoporin 50	GO:0006409 tRNA export from nucleus;GO:0006110 regulation of glycolytic process;GO:0071431 tRNA-containing ribonucleoprotein complex export from nucleus		Transporters/Transporter channels and pores	Nuclear membrane;Nucleoplasm(Enhanced)			(M5901)HALLMARK G2M CHECKPOINT	0.0	0.0	0.0	0.0	0.0	0.0	0.0	1.0	0.0	1.0	0.0	0.0	1.0	0.0	0.0	0.0	1.0	0.0	0.0	0.0
CCNDBP1	23582	symbol	H. sapiens	23582	H. sapiens	CCNDBP1	cyclin D1 binding protein 1	GO:0051726 regulation of cell cycle;GO:0007049 cell cycle;GO:0050794 regulation of cellular process			Nucleoplasm(Enhanced)				0.0	0.0	0.0	0.0	0.0	0.0	0.0	0.0	0.0	0.0	0.0	0.0	0.0	0.0	0.0	0.0	0.0	0.0	0.0	0.0
ZNF319	57567	symbol	H. sapiens	57567	H. sapiens	ZNF319	zinc finger protein 319	GO:0006355 regulation of transcription, DNA-templated;GO:1903506 regulation of nucleic acid-templated transcription;GO:0006351 transcription, DNA-templated		Transcription factors/Zinc-coordinating DNA-binding domains	Nucleus(Approved)				0.0	0.0	0.0	0.0	0.0	0.0	0.0	0.0	0.0	0.0	0.0	0.0	0.0	0.0	0.0	0.0	0.0	0.0	0.0	0.0
CD300A	11314	symbol	H. sapiens	11314	H. sapiens	CD300A	CD300a molecule	GO:0034125 negative regulation of MyD88-dependent toll-like receptor signaling pathway;GO:1902569 negative regulation of activation of Janus kinase activity;GO:0051134 negative regulation of NK T cell activation		CD markers					1.0	1.0	1.0	1.0	1.0	1.0	1.0	0.0	1.0	0.0	0.0	0.0	0.0	0.0	0.0	1.0	0.0	0.0	0.0	1.0
RGS14	10636	symbol	H. sapiens	10636	H. sapiens	RGS14	regulator of G protein signaling 14	GO:0031914 negative regulation of synaptic plasticity;GO:0010070 zygote asymmetric cell division;GO:0043407 negative regulation of MAP kinase activity			Nucleoplasm;Vesicles(Enhanced)				0.0	0.0	0.0	0.0	0.0	0.0	0.0	0.0	1.0	0.0	0.0	0.0	0.0	0.0	0.0	0.0	0.0	0.0	0.0	0.0
RSBN1	54665	symbol	H. sapiens	54665	H. sapiens	RSBN1	round spermatid basic protein 1	GO:0016569 covalent chromatin modification;GO:0006325 chromatin organization;GO:0051276 chromosome organization			Nucleoplasm(Supported)Nuclear bodies;Vesicles(Approved)				0.0	0.0	0.0	0.0	0.0	0.0	0.0	1.0	0.0	0.0	0.0	0.0	0.0	0.0	0.0	0.0	0.0	0.0	0.0	0.0
PFKFB4	5210	symbol	H. sapiens	5210	H. sapiens	PFKFB4	6-phosphofructo-2-kinase/fructose-2,6-biphosphatase 4	GO:0045821 positive regulation of glycolytic process;GO:2001171 positive regulation of ATP biosynthetic process;GO:0006110 regulation of glycolytic process		Enzymes/ENZYME proteins/{Hydrolases,Transferases}	Nucleoli(Approved)	Phosphoaminophosphonic Acid-Adenylate Ester (Fructose-2,6-bisphosphate 2-phosphatase activity);Fructose-6-Phosphate (Fructose-2,6-bisphosphate 2-phosphatase activity)			0.0	0.0	0.0	0.0	0.0	0.0	0.0	0.0	0.0	0.0	0.0	0.0	0.0	0.0	0.0	0.0	0.0	0.0	0.0	0.0
RC3H1	149041	symbol	H. sapiens	149041	H. sapiens	RC3H1	ring finger and CCCH-type domains 1	GO:0061470 T follicular helper cell differentiation;GO:0045623 negative regulation of T-helper cell differentiation;GO:0045622 regulation of T-helper cell differentiation			Cytosol;Plasma membrane(Supported)				1.0	1.0	1.0	0.0	1.0	0.0	1.0	0.0	0.0	0.0	0.0	0.0	0.0	0.0	0.0	1.0	0.0	0.0	0.0	1.0
PGAM1	5223	symbol	H. sapiens	5223	H. sapiens	PGAM1	phosphoglycerate mutase 1	GO:0061621 canonical glycolysis;GO:0061620 glycolytic process through glucose-6-phosphate;GO:0043456 regulation of pentose-phosphate shunt		Enzymes/ENZYME proteins/Isomerase	Nucleoplasm(Approved)			(M5937)HALLMARK GLYCOLYSIS	1.0	0.0	0.0	0.0	0.0	0.0	0.0	0.0	0.0	0.0	0.0	0.0	0.0	0.0	0.0	0.0	0.0	0.0	0.0	0.0
LUZP6	767558	symbol	H. sapiens	767558	H. sapiens	LUZP6	leucine zipper protein 6				Lipid droplets(Approved)				0.0	0.0	0.0	0.0	0.0	0.0	0.0	0.0	0.0	0.0	0.0	0.0	0.0	0.0	0.0	0.0	0.0	0.0	0.0	0.0
ATF7IP	55729	symbol	H. sapiens	55729	H. sapiens	ATF7IP	activating transcription factor 7 interacting protein	GO:0045898 regulation of RNA polymerase II transcriptional preinitiation complex assembly;GO:0060260 regulation of transcription initiation from RNA polymerase II promoter;GO:0051123 RNA polymerase II transcriptional preinitiation complex assembly			Nuclear bodies;Nucleoplasm(Enhanced)				0.0	0.0	0.0	0.0	0.0	0.0	0.0	1.0	0.0	0.0	0.0	0.0	0.0	0.0	0.0	0.0	1.0	0.0	0.0	0.0
NHSL2	340527	symbol	H. sapiens	340527	H. sapiens	NHSL2	NHS like 2	GO:0030154 cell differentiation;GO:0048869 cellular developmental process;GO:0032502 developmental process							0.0	0.0	0.0	0.0	0.0	0.0	0.0	0.0	0.0	0.0	0.0	0.0	0.0	0.0	0.0	0.0	0.0	0.0	0.0	0.0
LRRC4	64101	symbol	H. sapiens	64101	H. sapiens	LRRC4	leucine rich repeat containing 4	GO:0097119 postsynaptic density protein 95 clustering;GO:0097106 postsynaptic density organization;GO:0099084 postsynaptic specialization organization			Golgi apparatus(Approved)				0.0	0.0	0.0	0.0	0.0	0.0	0.0	0.0	0.0	1.0	0.0	0.0	0.0	0.0	0.0	0.0	0.0	0.0	0.0	0.0
TP53I11	9537	symbol	H. sapiens	9537	H. sapiens	TP53I11	tumor protein p53 inducible protein 11	GO:0008285 negative regulation of cell proliferation;GO:0042127 regulation of cell proliferation;GO:0008283 cell proliferation			Endoplasmic reticulum;Golgi apparatus(Supported)				0.0	0.0	0.0	0.0	0.0	0.0	0.0	0.0	0.0	0.0	0.0	0.0	0.0	0.0	0.0	0.0	0.0	0.0	0.0	0.0
LTA4H	4048	symbol	H. sapiens	4048	H. sapiens	LTA4H	leukotriene A4 hydrolase	GO:0019370 leukotriene biosynthetic process;GO:0006691 leukotriene metabolic process;GO:0043312 neutrophil degranulation		Enzymes/{ENZYME proteins/Hydrolases,Peptidases/Metallopeptidases}	Cytosol;Nucleoplasm(Supported)	Captopril (Zinc ion binding);N-[3-[(1-Aminoethyl)(Hydroxy)Phosphoryl]-2-(1,1'-Biphenyl-4-Ylmethyl)Propanoyl]Alanine (Zinc ion binding);3-(Benzyloxy)Pyridin-2-Amine (Zinc ion binding);Ubenimex (Zinc ion binding);DG051 (Zinc ion binding);CHR-2797 (Zinc ion binding);5-[2-(1H-pyrrol-1-yl)ethoxy]-1H-indole (Zinc ion binding);N-(pyridin-3-ylmethyl)aniline (Zinc ion binding);(4-fluorophenyl)(pyridin-4-y…		(M5946)HALLMARK COAGULATION; (M5924)HALLMARK MTORC1 SIGNALING; (M5921)HALLMARK COMPLEMENT	1.0	0.0	0.0	0.0	0.0	0.0	0.0	0.0	0.0	0.0	0.0	0.0	0.0	0.0	0.0	0.0	0.0	0.0	0.0	0.0
NARF	26502	symbol	H. sapiens	26502	H. sapiens	NARF	nuclear prelamin A recognition factor	GO:0055114 oxidation-reduction process;GO:0008152 metabolic process;GO:0008150 biological_process			Nucleus(Supported)Nucleoli(Approved)			(M5945)HALLMARK HEME METABOLISM	0.0	0.0	0.0	0.0	0.0	0.0	0.0	0.0	0.0	0.0	0.0	0.0	0.0	0.0	0.0	0.0	0.0	0.0	0.0	0.0
FCGR1B	2210	symbol	H. sapiens	2210	H. sapiens	FCGR1B	Fc fragment of IgG receptor Ib	GO:0002479 antigen processing and presentation of exogenous peptide antigen via MHC class I, TAP-dependent;GO:0042590 antigen processing and presentation of exogenous peptide antigen via MHC class I;GO:0060333 interferon-gamma-mediated signaling pathway				Immune Globulin Human (Immunoglobulin receptor activity)			0.0	0.0	1.0	0.0	0.0	0.0	1.0	0.0	0.0	1.0	0.0	0.0	0.0	0.0	0.0	0.0	0.0	0.0	0.0	1.0
CALM2	805	symbol	H. sapiens	805	H. sapiens	CALM2	calmodulin 2	GO:0010881 regulation of cardiac muscle contraction by regulation of the release of sequestered calcium ion;GO:0060316 positive regulation of ryanodine-sensitive calcium-release channel activity;GO:0060315 negative regulation of ryanodine-sensitive calcium-release channel activity		RAS pathway related proteins;Transporters/Accessory Factors Involved in Transport					0.0	0.0	1.0	0.0	0.0	0.0	0.0	0.0	1.0	0.0	0.0	0.0	1.0	0.0	0.0	0.0	0.0	0.0	0.0	0.0
RAB18	22931	symbol	H. sapiens	22931	H. sapiens	RAB18	RAB18, member RAS oncogene family	GO:0071786 endoplasmic reticulum tubular network organization;GO:0043312 neutrophil degranulation;GO:0002283 neutrophil activation involved in immune response							1.0	0.0	0.0	0.0	0.0	0.0	0.0	0.0	0.0	0.0	0.0	0.0	0.0	0.0	0.0	0.0	0.0	0.0	0.0	0.0
CD300LF	146722	symbol	H. sapiens	146722	H. sapiens	CD300LF	CD300 molecule like family member f	GO:0034125 negative regulation of MyD88-dependent toll-like receptor signaling pathway;GO:0034124 regulation of MyD88-dependent toll-like receptor signaling pathway;GO:1902216 positive regulation of interleukin-4-mediated signaling pathway		CD markers					1.0	1.0	1.0	1.0	1.0	1.0	1.0	0.0	0.0	1.0	0.0	0.0	0.0	0.0	0.0	0.0	0.0	0.0	0.0	0.0
TGFBR1	7046	symbol	H. sapiens	7046	H. sapiens	TGFBR1	transforming growth factor beta receptor 1	GO:1905007 positive regulation of epithelial to mesenchymal transition involved in endocardial cushion formation;GO:1905005 regulation of epithelial to mesenchymal transition involved in endocardial cushion formation;GO:1905075 positive regulation of occluding junction disassembly	TKL Ser/Thr protein kinase family	Enzymes/{ENZYME proteins/Transferases,Kinases/TKL Ser/Thr protein kinases}	Plasma membrane(Supported)Vesicles(Approved)	4-(3-Pyridin-2-Yl-1h-Pyrazol-4-Yl)Quinoline (Type ii transforming growth factor beta receptor binding);Naphthyridine Inhibitor (Type ii transforming growth factor beta receptor binding);3-(4-Fluorophenyl)-2-(6-Methylpyridin-2-Yl)-5,6-Dihydro-4h-Pyrrolo[1,2-B]Pyrazole (Type ii transforming growth factor beta receptor binding);N-[4-(5-fluoro-6-methylpyridin-2-yl)-5-quinoxalin-6-yl-1H-imidazol-2-yl]…	(M212)PID INTEGRIN5 PATHWAY; (M185)PID ALK1 PATHWAY; (M33)PID GLYPICAN 1PATHWAY	(M5896)HALLMARK TGF BETA SIGNALING	0.0	0.0	1.0	0.0	0.0	0.0	0.0	0.0	1.0	1.0	1.0	0.0	0.0	0.0	0.0	0.0	0.0	0.0	0.0	0.0
PLSCR1	5359	symbol	H. sapiens	5359	H. sapiens	PLSCR1	phospholipid scramblase 1	GO:0060368 regulation of Fc receptor mediated stimulatory signaling pathway;GO:2000373 positive regulation of DNA topoisomerase (ATP-hydrolyzing) activity;GO:0006659 phosphatidylserine biosynthetic process		Transporters	Nucleus;Plasma membrane(Supported)Golgi apparatus(Approved)			(M5892)HALLMARK CHOLESTEROL HOMEOSTASIS; (M5911)HALLMARK INTERFERON ALPHA RESPONSE; (M5921)HALLMARK COMPLEMENT	1.0	1.0	0.0	1.0	0.0	0.0	1.0	0.0	1.0	0.0	0.0	0.0	0.0	0.0	0.0	0.0	1.0	0.0	0.0	0.0
ZNF592	9640	symbol	H. sapiens	9640	H. sapiens	ZNF592	zinc finger protein 592	GO:0006355 regulation of transcription, DNA-templated;GO:1903506 regulation of nucleic acid-templated transcription;GO:0006351 transcription, DNA-templated		Transcription factors/Zinc-coordinating DNA-binding domains	Nucleoplasm(Approved)				0.0	0.0	0.0	0.0	0.0	0.0	0.0	0.0	0.0	0.0	0.0	0.0	0.0	0.0	0.0	0.0	0.0	0.0	0.0	0.0
OSTF1	26578	symbol	H. sapiens	26578	H. sapiens	OSTF1	osteoclast stimulating factor 1	GO:0043312 neutrophil degranulation;GO:0002283 neutrophil activation involved in immune response;GO:0042119 neutrophil activation			Cytosol(Supported)				1.0	0.0	0.0	0.0	0.0	0.0	0.0	0.0	0.0	0.0	0.0	0.0	0.0	0.0	0.0	0.0	0.0	0.0	0.0	0.0
XRN2	22803	symbol	H. sapiens	22803	H. sapiens	XRN2	5'-3' exoribonuclease 2	GO:0000738 DNA catabolic process, exonucleolytic;GO:0021766 hippocampus development;GO:0090503 RNA phosphodiester bond hydrolysis, exonucleolytic			Nucleoli;Nucleus(Enhanced)				0.0	0.0	0.0	0.0	0.0	0.0	0.0	0.0	0.0	0.0	0.0	0.0	0.0	0.0	0.0	0.0	0.0	0.0	0.0	0.0
SAP25	100316904	symbol	H. sapiens	100316904	H. sapiens	SAP25	Sin3A associated protein 25	GO:0006355 regulation of transcription, DNA-templated;GO:1903506 regulation of nucleic acid-templated transcription;GO:0006351 transcription, DNA-templated			Nuclear bodies(Approved)				0.0	0.0	0.0	0.0	0.0	0.0	0.0	0.0	0.0	0.0	0.0	0.0	0.0	0.0	0.0	0.0	0.0	0.0	0.0	0.0
APOL2	23780	symbol	H. sapiens	23780	H. sapiens	APOL2	apolipoprotein L2	GO:0006953 acute-phase response;GO:0060135 maternal process involved in female pregnancy;GO:0008203 cholesterol metabolic process			Cytosol;Nuclear bodies;Nucleoplasm(Approved)				0.0	0.0	0.0	1.0	0.0	0.0	0.0	0.0	0.0	0.0	0.0	0.0	0.0	0.0	0.0	0.0	0.0	0.0	0.0	0.0
PRCP	5547	symbol	H. sapiens	5547	H. sapiens	PRCP	prolylcarboxypeptidase	GO:0002353 plasma kallikrein-kinin cascade;GO:0002155 regulation of thyroid hormone mediated signaling pathway;GO:0002254 kinin cascade		Enzymes/{ENZYME proteins/Hydrolases,Peptidases/Serine-type peptidases}				(M5921)HALLMARK COMPLEMENT	1.0	0.0	0.0	1.0	0.0	0.0	0.0	0.0	0.0	0.0	0.0	0.0	0.0	0.0	0.0	0.0	0.0	0.0	0.0	0.0
SERTAD3	29946	symbol	H. sapiens	29946	H. sapiens	SERTAD3	SERTA domain containing 3	GO:0030308 negative regulation of cell growth;GO:0045926 negative regulation of growth;GO:0001558 regulation of cell growth			Nucleoli(Supported)			(M5939)HALLMARK P53 PATHWAY	0.0	0.0	0.0	0.0	0.0	0.0	0.0	0.0	0.0	0.0	0.0	0.0	0.0	0.0	0.0	0.0	0.0	0.0	0.0	0.0
RAB24	53917	symbol	H. sapiens	53917	H. sapiens	RAB24	RAB24, member RAS oncogene family	GO:0043312 neutrophil degranulation;GO:0002283 neutrophil activation involved in immune response;GO:0042119 neutrophil activation			Focal adhesion sites(Uncertain)				1.0	0.0	0.0	0.0	0.0	0.0	0.0	0.0	0.0	0.0	0.0	0.0	0.0	0.0	0.0	0.0	0.0	0.0	0.0	0.0
SYNE2	23224	symbol	H. sapiens	23224	H. sapiens	SYNE2	spectrin repeat containing nuclear envelope protein 2	GO:0021817 nucleokinesis involved in cell motility in cerebral cortex radial glia guided migration;GO:0021815 modulation of microtubule cytoskeleton involved in cerebral cortex radial glia guided migration;GO:0021814 cell motility involved in cerebral cortex radial glia guided migration			Nuclear membrane(Enhanced)				0.0	0.0	0.0	0.0	0.0	0.0	0.0	0.0	0.0	0.0	0.0	0.0	1.0	0.0	0.0	0.0	0.0	0.0	0.0	0.0
RPS6KA3	6197	symbol	H. sapiens	6197	H. sapiens	RPS6KA3	ribosomal protein S6 kinase A3	GO:0002224 toll-like receptor signaling pathway;GO:0043154 negative regulation of cysteine-type endopeptidase activity involved in apoptotic process;GO:0043555 regulation of translation in response to stress	AGC Ser/Thr protein kinase family	Enzymes/{ENZYME proteins/Transferases,Kinases/AGC Ser/Thr protein kinases}	Cytosol;Nucleoli;Nucleus(Approved)	Acetylsalicylic acid (Ribosomal protein s6 kinase activity)	(M17200)SA B CELL RECEPTOR COMPLEXES; (M4910)ST ERK1 ERK2 MAPK PATHWAY; (M1315)SIG PIP3 SIGNALING IN B LYMPHOCYTES	(M5910)HALLMARK PROTEIN SECRETION; (M5908)HALLMARK ANDROGEN RESPONSE; (M5923)HALLMARK PI3K AKT MTOR SIGNALING	0.0	0.0	0.0	1.0	0.0	0.0	1.0	0.0	1.0	1.0	0.0	0.0	1.0	0.0	0.0	0.0	0.0	0.0	0.0	0.0
PPP1CA	5499	symbol	H. sapiens	5499	H. sapiens	PPP1CA	protein phosphatase 1 catalytic subunit alpha	GO:0036496 regulation of translational initiation by eIF2 alpha dephosphorylation;GO:0005981 regulation of glycogen catabolic process;GO:2001241 positive regulation of extrinsic apoptotic signaling pathway in absence of ligand		Enzymes/ENZYME proteins/Hydrolases	Cytosol;Nucleoplasm(Supported)Plasma membrane(Approved)	2,6,8-Trimethyl-3-Amino-9-Benzyl-9-Methoxynonanoic Acid (Ribonucleoprotein complex binding)	(M185)PID ALK1 PATHWAY; (M181)PID BMP PATHWAY; (M286)PID TGFBR PATHWAY	(M5896)HALLMARK TGF BETA SIGNALING; (M5923)HALLMARK PI3K AKT MTOR SIGNALING	0.0	1.0	0.0	0.0	0.0	0.0	0.0	0.0	1.0	0.0	0.0	0.0	0.0	0.0	0.0	0.0	0.0	0.0	0.0	0.0
EXTL3	2137	symbol	H. sapiens	2137	H. sapiens	EXTL3	exostosin like glycosyltransferase 3	GO:0036498 IRE1-mediated unfolded protein response;GO:0015012 heparan sulfate proteoglycan biosynthetic process;GO:0030201 heparan sulfate proteoglycan metabolic process		Enzymes/ENZYME proteins/Transferases					0.0	0.0	0.0	0.0	0.0	0.0	0.0	0.0	0.0	0.0	0.0	0.0	0.0	0.0	0.0	0.0	0.0	0.0	0.0	0.0
CBFA2T3	863	symbol	H. sapiens	863	H. sapiens	CBFA2T3	CBFA2/RUNX1 translocation partner 3	GO:0045820 negative regulation of glycolytic process;GO:2001170 negative regulation of ATP biosynthetic process;GO:0006110 regulation of glycolytic process			Nucleoplasm(Enhanced)		(M13)PID ERBB4 PATHWAY	(M5906)HALLMARK ESTROGEN RESPONSE EARLY	0.0	1.0	0.0	0.0	0.0	0.0	0.0	0.0	1.0	0.0	0.0	0.0	0.0	0.0	1.0	0.0	0.0	0.0	0.0	0.0
TMEM30A	55754	symbol	H. sapiens	55754	H. sapiens	TMEM30A	transmembrane protein 30A	GO:0070863 positive regulation of protein exit from endoplasmic reticulum;GO:0015917 aminophospholipid transport;GO:0070861 regulation of protein exit from endoplasmic reticulum		Transporters/Accessory Factors Involved in Transport	Mitochondria(Supported)				1.0	0.0	0.0	0.0	0.0	0.0	0.0	0.0	0.0	0.0	0.0	0.0	0.0	0.0	0.0	0.0	0.0	0.0	0.0	0.0
TPRG1L	127262	symbol	H. sapiens	127262	H. sapiens	TPRG1L	tumor protein p63 regulated 1 like	GO:0008150 biological_process			Cytosol;Vesicles(Approved)				0.0	0.0	0.0	0.0	0.0	0.0	0.0	0.0	0.0	0.0	0.0	0.0	0.0	0.0	0.0	0.0	0.0	0.0	0.0	0.0
HK3	3101	symbol	H. sapiens	3101	H. sapiens	HK3	hexokinase 3	GO:0061621 canonical glycolysis;GO:0061620 glycolytic process through glucose-6-phosphate;GO:0061615 glycolytic process through fructose-6-phosphate		Enzymes/ENZYME proteins/Transferases					1.0	0.0	0.0	0.0	0.0	0.0	0.0	0.0	0.0	0.0	0.0	0.0	0.0	0.0	0.0	0.0	0.0	0.0	0.0	0.0
PRAM1	84106	symbol	H. sapiens	84106	H. sapiens	PRAM1	PML-RARA regulated adaptor molecule 1	GO:0043313 regulation of neutrophil degranulation;GO:1902563 regulation of neutrophil activation;GO:0043300 regulation of leukocyte degranulation			Golgi apparatus(Approved)				1.0	1.0	0.0	0.0	0.0	0.0	0.0	0.0	0.0	0.0	0.0	0.0	0.0	0.0	0.0	0.0	0.0	0.0	0.0	1.0
CNOT3	4849	symbol	H. sapiens	4849	H. sapiens	CNOT3	CCR4-NOT transcription complex subunit 3	GO:0006977 DNA damage response, signal transduction by p53 class mediator resulting in cell cycle arrest;GO:0072431 signal transduction involved in mitotic G1 DNA damage checkpoint;GO:0031571 mitotic G1 DNA damage checkpoint			Cytosol(Approved)				0.0	0.0	0.0	0.0	0.0	0.0	0.0	0.0	0.0	0.0	0.0	0.0	0.0	0.0	0.0	0.0	0.0	0.0	0.0	0.0
CASS4	57091	symbol	H. sapiens	57091	H. sapiens	CASS4	Cas scaffolding protein family member 4	GO:0007155 cell adhesion;GO:0022610 biological adhesion;GO:0008150 biological_process							0.0	0.0	0.0	0.0	0.0	0.0	0.0	0.0	0.0	0.0	0.0	0.0	0.0	0.0	0.0	0.0	0.0	0.0	0.0	0.0
NFXL1	152518	symbol	H. sapiens	152518	H. sapiens	NFXL1	nuclear transcription factor, X-box binding like 1	GO:0000122 negative regulation of transcription by RNA polymerase II;GO:0045892 negative regulation of transcription, DNA-templated;GO:1903507 negative regulation of nucleic acid-templated transcription		Transcription factors/Yet undefined DNA-binding domains	Nucleoplasm(Approved)				0.0	0.0	0.0	0.0	0.0	0.0	0.0	0.0	0.0	0.0	0.0	0.0	0.0	0.0	0.0	0.0	0.0	0.0	0.0	0.0
FHL3	2275	symbol	H. sapiens	2275	H. sapiens	FHL3	four and a half LIM domains 3	GO:0007517 muscle organ development;GO:0030036 actin cytoskeleton organization;GO:0061061 muscle structure development			Nucleus(Approved)				0.0	0.0	0.0	0.0	0.0	0.0	0.0	0.0	0.0	0.0	0.0	0.0	0.0	0.0	0.0	0.0	0.0	0.0	0.0	0.0
S1PR4	8698	symbol	H. sapiens	8698	H. sapiens	S1PR4	sphingosine-1-phosphate receptor 4	GO:0007202 activation of phospholipase C activity;GO:0010863 positive regulation of phospholipase C activity;GO:1900274 regulation of phospholipase C activity		G-protein coupled receptors/{GPCRs excl olfactory receptors,Lysolipids receptors}	Mitochondria(Uncertain)		(M64)PID S1P S1P4 PATHWAY; (M155)PID S1P META PATHWAY		0.0	0.0	0.0	0.0	0.0	0.0	0.0	0.0	1.0	0.0	0.0	0.0	0.0	0.0	0.0	0.0	0.0	0.0	0.0	0.0
HERC5	51191	symbol	H. sapiens	51191	H. sapiens	HERC5	HECT and RLD domain containing E3 ubiquitin protein ligase 5	GO:0032020 ISG15-protein conjugation;GO:0032480 negative regulation of type I interferon production;GO:0000079 regulation of cyclin-dependent protein serine/threonine kinase activity							0.0	0.0	1.0	1.0	0.0	0.0	0.0	0.0	0.0	1.0	0.0	0.0	0.0	0.0	0.0	0.0	0.0	0.0	0.0	1.0
CMTM2	146225	symbol	H. sapiens	146225	H. sapiens	CMTM2	CKLF like MARVEL transmembrane domain containing 2	GO:0010469 regulation of signaling receptor activity;GO:0006935 chemotaxis;GO:0042330 taxis					(M58)PID AR PATHWAY		0.0	0.0	0.0	0.0	0.0	0.0	0.0	0.0	0.0	0.0	0.0	0.0	0.0	0.0	0.0	0.0	0.0	0.0	0.0	0.0
SRF	6722	symbol	H. sapiens	6722	H. sapiens	SRF	serum response factor	GO:0003257 positive regulation of transcription from RNA polymerase II promoter involved in myocardial precursor cell differentiation;GO:0046016 positive regulation of transcription by glucose;GO:0045059 positive thymic T cell selection		Transcription factors	Nucleus(Supported)		(M199)PID P38 MK2 PATHWAY; (M206)PID PDGFRA PATHWAY; (M30)PID HDAC CLASSII PATHWAY	(M5908)HALLMARK ANDROGEN RESPONSE	0.0	1.0	0.0	0.0	0.0	0.0	0.0	0.0	0.0	0.0	0.0	0.0	1.0	0.0	1.0	0.0	0.0	0.0	0.0	0.0
ACAP1	9744	symbol	H. sapiens	9744	H. sapiens	ACAP1	ArfGAP with coiled-coil, ankyrin repeat and PH domains 1	GO:0043547 positive regulation of GTPase activity;GO:0043087 regulation of GTPase activity;GO:0051345 positive regulation of hydrolase activity			Golgi apparatus(Approved)		(M86)PID ARF6 PATHWAY; (M67)PID ARF6 TRAFFICKING PATHWAY		0.0	0.0	0.0	0.0	0.0	0.0	0.0	0.0	1.0	0.0	0.0	0.0	0.0	0.0	0.0	0.0	0.0	0.0	0.0	0.0
MANSC1	54682	symbol	H. sapiens	54682	H. sapiens	MANSC1	MANSC domain containing 1				Golgi apparatus;Vesicles(Approved)				0.0	0.0	0.0	0.0	0.0	0.0	0.0	0.0	0.0	0.0	0.0	0.0	0.0	0.0	0.0	0.0	0.0	0.0	0.0	0.0
KANSL1	284058	symbol	H. sapiens	284058	H. sapiens	KANSL1	KAT8 regulatory NSL complex subunit 1	GO:0043982 histone H4-K8 acetylation;GO:0043981 histone H4-K5 acetylation;GO:0043984 histone H4-K16 acetylation			Nucleoplasm(Supported)				0.0	0.0	0.0	0.0	0.0	0.0	0.0	1.0	0.0	0.0	0.0	0.0	0.0	0.0	0.0	0.0	0.0	0.0	0.0	0.0
CAB39	51719	symbol	H. sapiens	51719	H. sapiens	CAB39	calcium binding protein 39	GO:1901017 negative regulation of potassium ion transmembrane transporter activity;GO:1901380 negative regulation of potassium ion transmembrane transport;GO:1901016 regulation of potassium ion transmembrane transporter activity			Cytosol;Nucleoli fibrillar center(Approved)		(M87)PID LKB1 PATHWAY	(M5923)HALLMARK PI3K AKT MTOR SIGNALING	1.0	0.0	0.0	0.0	0.0	0.0	0.0	0.0	0.0	0.0	0.0	0.0	0.0	0.0	0.0	0.0	0.0	1.0	0.0	0.0
INTS3	65123	symbol	H. sapiens	65123	H. sapiens	INTS3	integrator complex subunit 3	GO:0042795 snRNA transcription by RNA polymerase II;GO:0009301 snRNA transcription;GO:0016180 snRNA processing			Nucleoli;Nucleus(Supported)				0.0	0.0	0.0	0.0	0.0	0.0	0.0	0.0	0.0	0.0	0.0	0.0	0.0	0.0	0.0	0.0	0.0	0.0	0.0	0.0
APOBEC3A_B	100913187	symbol	H. sapiens	100913187	H. sapiens	APOBEC3A_B	APOBEC3A and APOBEC3B deletion hybrid				Nucleoplasm(Uncertain)				0.0	0.0	0.0	0.0	0.0	0.0	0.0	0.0	0.0	0.0	0.0	0.0	0.0	0.0	0.0	0.0	0.0	0.0	0.0	0.0
FAM63A	55793	gene_synonym	H. sapiens	55793	H. sapiens	MINDY1	MINDY lysine 48 deubiquitinase 1	GO:0071108 protein K48-linked deubiquitination;GO:0016579 protein deubiquitination;GO:0070646 protein modification by small protein removal		Enzymes/{ENZYME proteins/Hydrolases,Peptidases}	Nucleoplasm(Supported)			(M5906)HALLMARK ESTROGEN RESPONSE EARLY	0.0	0.0	0.0	0.0	0.0	0.0	0.0	0.0	0.0	0.0	0.0	0.0	0.0	0.0	0.0	0.0	0.0	0.0	0.0	0.0
SNAP23	8773	symbol	H. sapiens	8773	H. sapiens	SNAP23	synaptosome associated protein 23	GO:0002553 histamine secretion by mast cell;GO:0002441 histamine secretion involved in inflammatory response;GO:0031629 synaptic vesicle fusion to presynaptic active zone membrane		Transporters/Transporter channels and pores	Plasma membrane(Supported)			(M5910)HALLMARK PROTEIN SECRETION	1.0	0.0	1.0	1.0	0.0	0.0	0.0	0.0	0.0	0.0	0.0	0.0	0.0	0.0	0.0	0.0	0.0	0.0	0.0	0.0
ARF6	382	symbol	H. sapiens	382	H. sapiens	ARF6	ADP ribosylation factor 6	GO:0048261 negative regulation of receptor-mediated endocytosis;GO:0035020 regulation of Rac protein signal transduction;GO:0097284 hepatocyte apoptotic process		RAS pathway related proteins		5'-Guanosine-Diphosphate-Monothiophosphate (Thioesterase binding);Guanosine-5'-Diphosphate (Thioesterase binding);MYRISTIC ACID (Thioesterase binding)	(M120)PID ARF6 DOWNSTREAM PATHWAY; (M277)PID INTEGRIN A4B1 PATHWAY; (M86)PID ARF6 PATHWAY	(M5893)HALLMARK MITOTIC SPINDLE	0.0	0.0	0.0	0.0	0.0	0.0	0.0	0.0	0.0	0.0	0.0	0.0	0.0	0.0	0.0	0.0	0.0	0.0	0.0	0.0
FAM160B1	57700	symbol	H. sapiens	57700	H. sapiens	FAM160B1	family with sequence similarity 160 member B1				Cytosol;Nuclear speckles(Approved)				0.0	0.0	0.0	0.0	0.0	0.0	0.0	0.0	0.0	0.0	0.0	0.0	0.0	0.0	0.0	0.0	0.0	0.0	0.0	0.0
JAK2	3717	symbol	H. sapiens	3717	H. sapiens	JAK2	Janus kinase 2	GO:1902728 positive regulation of growth factor dependent skeletal muscle satellite cell proliferation;GO:0060399 positive regulation of growth hormone receptor signaling pathway;GO:1902724 positive regulation of skeletal muscle satellite cell proliferation	Tyr protein kinase family	Enzymes/{ENZYME proteins/Transferases,Kinases/Tyr protein kinases}	Nucleoplasm(Supported)Focal adhesion sites;Plasma membrane(Approved)	2-(1,1-DIMETHYLETHYL)9-FLUORO-3,6-DIHYDRO-7H-BENZ[H]-IMIDAZ[4,5-F]ISOQUINOLIN-7-ONE (Sh2 domain binding);XL019 (Sh2 domain binding);5-phenyl-1H-indazol-3-amine (Sh2 domain binding);4-(3-amino-1H-indazol-5-yl)-N-tert-butylbenzenesulfonamide (Sh2 domain binding);4-[(2-{4-[(CYCLOPROPYLCARBAMOYL)AMINO]-1H-PYRAZOL-3-YL}-1H-BENZIMIDAZOL-6-YL)METHYL]MORPHOLIN-4-IUM (Sh2 domain binding);3-{(3R,4R)-4-meth…	(M17580)ST IL 13 PATHWAY; (M5248)ST JAK STAT PATHWAY; (M4170)ST INTERFERON GAMMA PATHWAY	(M5950)HALLMARK ALLOGRAFT REJECTION; (M5913)HALLMARK INTERFERON GAMMA RESPONSE; (M5906)HALLMARK ESTROGEN RESPONSE EARLY	0.0	1.0	0.0	1.0	1.0	0.0	0.0	1.0	1.0	1.0	1.0	0.0	1.0	0.0	1.0	0.0	0.0	0.0	0.0	1.0
GLTSCR1L	23506	gene_synonym	H. sapiens	23506	H. sapiens	BICRAL	BRD4 interacting chromatin remodeling complex associated protein like				Nucleoplasm(Supported)				0.0	0.0	0.0	0.0	0.0	0.0	0.0	0.0	0.0	0.0	0.0	0.0	0.0	0.0	0.0	0.0	0.0	0.0	0.0	0.0
LILRA1	11024	symbol	H. sapiens	11024	H. sapiens	LILRA1	leukocyte immunoglobulin like receptor A1	GO:0002250 adaptive immune response;GO:0050776 regulation of immune response;GO:0002682 regulation of immune system process		CD markers					0.0	0.0	1.0	0.0	0.0	1.0	0.0	0.0	0.0	0.0	0.0	0.0	0.0	0.0	0.0	0.0	0.0	0.0	0.0	1.0
MXD3	83463	symbol	H. sapiens	83463	H. sapiens	MXD3	MAX dimerization protein 3	GO:0000122 negative regulation of transcription by RNA polymerase II;GO:0045892 negative regulation of transcription, DNA-templated;GO:1903507 negative regulation of nucleic acid-templated transcription		Transcription factors/Basic domains	Nucleoli;Nucleus(Approved)			(M5925)HALLMARK E2F TARGETS	0.0	0.0	0.0	0.0	0.0	0.0	0.0	0.0	0.0	0.0	0.0	0.0	0.0	0.0	0.0	0.0	0.0	0.0	0.0	0.0
F2RL1	2150	symbol	H. sapiens	2150	H. sapiens	F2RL1	F2R like trypsin receptor 1	GO:0070963 positive regulation of neutrophil mediated killing of gram-negative bacterium;GO:1900135 positive regulation of renin secretion into blood stream;GO:0070962 positive regulation of neutrophil mediated killing of bacterium		G-protein coupled receptors/GPCRs excl olfactory receptors;Transporters	Plasma membrane(Approved)		(M15743)ST GA12 PATHWAY	(M5953)HALLMARK KRAS SIGNALING UP; (M5890)HALLMARK TNFA SIGNALING VIA NFKB	1.0	1.0	0.0	1.0	1.0	0.0	1.0	0.0	1.0	1.0	0.0	0.0	0.0	1.0	1.0	1.0	0.0	0.0	0.0	1.0
CAPN1	823	symbol	H. sapiens	823	H. sapiens	CAPN1	calpain 1	GO:0060056 mammary gland involution;GO:2000310 regulation of NMDA receptor activity;GO:0070268 cornification		Enzymes/{ENZYME proteins/Hydrolases,Peptidases/Cysteine-type peptidases}	Cytosol(Supported)	N-[N-[1-Hydroxycarboxyethyl-Carbonyl]Leucylamino-Butyl]-Guanidine (Calcium-dependent cysteine-type endopeptidase activity);CBZ-LEU-LEU-TYR-CH2F (Calcium-dependent cysteine-type endopeptidase activity);(2S)-4-METHYL-2-(3-PHENYLTHIOUREIDO)-N-((3S)-TETRAHYDRO-2-HYDROXY-3-FURANYL)PENTANAMIDE (Calcium-dependent cysteine-type endopeptidase activity)	(M50)PID PTP1B PATHWAY		1.0	0.0	0.0	0.0	0.0	0.0	0.0	0.0	0.0	0.0	0.0	0.0	0.0	0.0	0.0	0.0	0.0	0.0	0.0	0.0
STX10	8677	symbol	H. sapiens	8677	H. sapiens	STX10	syntaxin 10	GO:0034498 early endosome to Golgi transport;GO:0042147 retrograde transport, endosome to Golgi;GO:0048278 vesicle docking			Golgi apparatus(Approved)				0.0	0.0	0.0	0.0	0.0	0.0	0.0	0.0	0.0	0.0	0.0	0.0	0.0	0.0	0.0	0.0	0.0	0.0	0.0	0.0
SLC12A1	6557	symbol	H. sapiens	6557	H. sapiens	SLC12A1	solute carrier family 12 member 1	GO:1902476 chloride transmembrane transport;GO:0006821 chloride transport;GO:0098661 inorganic anion transmembrane transport		Transporters/Electrochemical Potential-driven transporters	Vesicles(Approved)Nucleus(Uncertain)	Torasemide (Sodium:potassium:chloride symporter activity);Methyclothiazide (Sodium:potassium:chloride symporter activity);Chlorthalidone (Sodium:potassium:chloride symporter activity);Chlormerodrin (Sodium:potassium:chloride symporter activity);Furosemide (Sodium:potassium:chloride symporter activity);Potassium Chloride (Sodium:potassium:chloride symporter activity);Hydroflumethiazide (Sodium:pot…			0.0	0.0	0.0	0.0	0.0	0.0	0.0	0.0	0.0	0.0	0.0	0.0	0.0	0.0	0.0	0.0	0.0	0.0	0.0	0.0
KRAS	3845	symbol	H. sapiens	3845	H. sapiens	KRAS	KRAS proto-oncogene, GTPase	GO:0021897 forebrain astrocyte development;GO:0021896 forebrain astrocyte differentiation;GO:0035022 positive regulation of Rac protein signal transduction		RAS pathway related proteins		[(3,7,11-TRIMETHYL-DODECA-2,6,10-TRIENYLOXYCARBAMOYL)-METHYL]-PHOSPHONIC ACID (Protein complex binding);FARNESYL DIPHOSPHATE (Protein complex binding)	(M134)PID TCR RAS PATHWAY; (M269)PID RAS PATHWAY; (M270)PID MAPK TRK PATHWAY		0.0	0.0	1.0	1.0	0.0	0.0	1.0	0.0	0.0	1.0	1.0	0.0	0.0	0.0	0.0	0.0	0.0	0.0	0.0	0.0
ADAM10	102	symbol	H. sapiens	102	H. sapiens	ADAM10	ADAM metallopeptidase domain 10	GO:0010820 positive regulation of T cell chemotaxis;GO:0051089 constitutive protein ectodomain proteolysis;GO:0010819 regulation of T cell chemotaxis		CD markers;Enzymes/ENZYME proteins/Hydrolases;Transporters/Accessory Factors Involved in Transport	Plasma membrane;Vesicles(Supported)	XL784 (Zinc ion binding)	(M70)PID PS1 PATHWAY; (M142)PID AJDISS 2PATHWAY; (M17)PID NOTCH PATHWAY	(M5916)HALLMARK APICAL SURFACE; (M5910)HALLMARK PROTEIN SECRETION	1.0	1.0	0.0	1.0	1.0	0.0	0.0	0.0	0.0	0.0	0.0	0.0	0.0	0.0	0.0	0.0	0.0	0.0	0.0	0.0
LIN7A	8825	symbol	H. sapiens	8825	H. sapiens	LIN7A	lin-7 homolog A, crumbs cell polarity complex component	GO:0045199 maintenance of epithelial cell apical/basal polarity;GO:0035090 maintenance of apical/basal cell polarity;GO:1903361 protein localization to basolateral plasma membrane							0.0	0.0	0.0	0.0	0.0	0.0	0.0	0.0	0.0	0.0	0.0	0.0	0.0	0.0	0.0	0.0	0.0	0.0	0.0	0.0
NTNG2	84628	symbol	H. sapiens	84628	H. sapiens	NTNG2	netrin G2	GO:0006501 C-terminal protein lipidation;GO:0018410 C-terminal protein amino acid modification;GO:0007409 axonogenesis			Cytokinetic bridge;Cytosol;Plasma membrane(Supported)Midbody ring;Nucleoli;Nucleus(Uncertain)		(M5887)NABA BASEMENT MEMBRANES; (M3008)NABA ECM GLYCOPROTEINS; (M5884)NABA CORE MATRISOME		0.0	0.0	0.0	0.0	0.0	0.0	0.0	0.0	0.0	0.0	0.0	0.0	0.0	0.0	0.0	0.0	0.0	0.0	0.0	0.0
SUPT20H	55578	symbol	H. sapiens	55578	H. sapiens	SUPT20H	SPT20 homolog, SAGA complex component	GO:0007369 gastrulation;GO:0006914 autophagy;GO:0061919 process utilizing autophagic mechanism			Nucleoli fibrillar center(Supported)				0.0	0.0	0.0	0.0	0.0	0.0	0.0	1.0	0.0	0.0	0.0	0.0	0.0	0.0	0.0	0.0	0.0	0.0	0.0	0.0
ADCY7	113	symbol	H. sapiens	113	H. sapiens	ADCY7	adenylate cyclase 7	GO:0034199 activation of protein kinase A activity;GO:0071377 cellular response to glucagon stimulus;GO:0003091 renal water homeostasis		Enzymes/ENZYME proteins/Lyases	Cytosol(Approved)		(M56)PID LPA4 PATHWAY; (M8)PID ENDOTHELIN PATHWAY; (M15)PID LYSOPHOSPHOLIPID PATHWAY		0.0	0.0	0.0	0.0	0.0	0.0	0.0	0.0	0.0	0.0	0.0	0.0	0.0	0.0	0.0	0.0	0.0	0.0	0.0	0.0
ATXN1	6310	symbol	H. sapiens	6310	H. sapiens	ATXN1	ataxin 1	GO:0035176 social behavior;GO:0007613 memory;GO:0051703 intraspecies interaction between organisms			Cytosol;Nucleoli;Nucleus(Supported)			(M5949)HALLMARK PEROXISOME; (M5948)HALLMARK BILE ACID METABOLISM; (M5942)HALLMARK UV RESPONSE DN	0.0	0.0	0.0	0.0	0.0	0.0	0.0	0.0	0.0	0.0	0.0	0.0	0.0	0.0	0.0	0.0	0.0	0.0	0.0	0.0
MSL3	10943	symbol	H. sapiens	10943	H. sapiens	MSL3	MSL complex subunit 3	GO:0043984 histone H4-K16 acetylation;GO:0043968 histone H2A acetylation;GO:0043967 histone H4 acetylation			Nucleoplasm(Approved)				0.0	0.0	0.0	0.0	0.0	0.0	0.0	1.0	0.0	0.0	0.0	0.0	0.0	0.0	0.0	0.0	0.0	0.0	0.0	0.0
RUNX2	860	symbol	H. sapiens	860	H. sapiens	RUNX2	runt related transcription factor 2	GO:0001958 endochondral ossification;GO:0032332 positive regulation of chondrocyte differentiation;GO:0002051 osteoblast fate commitment		Transcription factors/Immunoglobulin fold	Nucleoplasm(Enhanced)		(M288)PID HES HEY PATHWAY; (M276)PID FGF PATHWAY; (M279)PID RB 1PATHWAY		0.0	1.0	0.0	0.0	0.0	0.0	0.0	0.0	0.0	0.0	0.0	1.0	0.0	0.0	0.0	0.0	0.0	0.0	0.0	0.0
CTSZ	1522	symbol	H. sapiens	1522	H. sapiens	CTSZ	cathepsin Z	GO:0002003 angiotensin maturation;GO:0002002 regulation of angiotensin levels in blood;GO:0001991 regulation of systemic arterial blood pressure by circulatory renin-angiotensin		Enzymes/{ENZYME proteins/Hydrolases,Peptidases/Cysteine-type peptidases}	Vesicles(Supported)		(M3468)NABA ECM REGULATORS; (M5885)NABA MATRISOME ASSOCIATED; (M5889)NABA MATRISOME	(M5947)HALLMARK IL2 STAT5 SIGNALING	1.0	0.0	0.0	0.0	0.0	0.0	0.0	0.0	1.0	0.0	0.0	0.0	0.0	0.0	0.0	0.0	0.0	0.0	0.0	0.0
SCAP	22937	symbol	H. sapiens	22937	H. sapiens	SCAP	SREBF chaperone	GO:0045716 positive regulation of low-density lipoprotein particle receptor biosynthetic process;GO:0045541 negative regulation of cholesterol biosynthetic process;GO:0090206 negative regulation of cholesterol metabolic process					(M7997)SA CASPASE CASCADE		0.0	0.0	0.0	0.0	0.0	0.0	0.0	0.0	0.0	0.0	0.0	0.0	0.0	0.0	0.0	0.0	0.0	0.0	0.0	0.0
NFYA	4800	symbol	H. sapiens	4800	H. sapiens	NFYA	nuclear transcription factor Y subunit alpha	GO:0045540 regulation of cholesterol biosynthetic process;GO:0090181 regulation of cholesterol metabolic process;GO:0006695 cholesterol biosynthetic process		Transcription factors/Other all-alpha-helical DNA-binding domains	Nucleoplasm(Enhanced)		(M254)PID MYC REPRESS PATHWAY; (M145)PID P53 DOWNSTREAM PATHWAY	(M5922)HALLMARK UNFOLDED PROTEIN RESPONSE	0.0	0.0	0.0	0.0	0.0	0.0	0.0	0.0	0.0	0.0	0.0	0.0	0.0	0.0	0.0	0.0	0.0	0.0	0.0	0.0
CEP63	80254	symbol	H. sapiens	80254	H. sapiens	CEP63	centrosomal protein 63	GO:0098535 de novo centriole assembly involved in multi-ciliated epithelial cell differentiation;GO:0097742 de novo centriole assembly;GO:0007099 centriole replication			Nucleoplasm(Approved)				0.0	0.0	0.0	0.0	0.0	0.0	0.0	0.0	0.0	0.0	0.0	0.0	1.0	0.0	0.0	0.0	0.0	0.0	0.0	0.0
PHF3	23469	symbol	H. sapiens	23469	H. sapiens	PHF3	PHD finger protein 3	GO:0006351 transcription, DNA-templated;GO:0097659 nucleic acid-templated transcription;GO:0032774 RNA biosynthetic process			Nucleoplasm(Approved)			(M5942)HALLMARK UV RESPONSE DN	0.0	0.0	0.0	0.0	0.0	0.0	0.0	0.0	0.0	0.0	0.0	0.0	0.0	0.0	0.0	0.0	0.0	0.0	0.0	0.0
NQO2	4835	symbol	H. sapiens	4835	H. sapiens	NQO2	N-ribosyldihydronicotinamide:quinone reductase 2	GO:0006805 xenobiotic metabolic process;GO:0071466 cellular response to xenobiotic stimulus;GO:0022900 electron transport chain		Enzymes/ENZYME proteins/Oxidoreductases	Cytosol(Supported)Nucleoplasm(Approved)	NADH (Nadph dehydrogenase (quinone) activity);Menadione (Nadph dehydrogenase (quinone) activity);Melatonin (Nadph dehydrogenase (quinone) activity);Primaquine (Nadph dehydrogenase (quinone) activity);Resveratrol (Nadph dehydrogenase (quinone) activity);Flavin adenine dinucleotide (Nadph dehydrogenase (quinone) activity);10-Propargyl-5,8-Dideazafolic Acid (Nadph dehydrogenase (quinone) activity);C…		(M5936)HALLMARK OXIDATIVE PHOSPHORYLATION	0.0	0.0	0.0	0.0	0.0	0.0	0.0	0.0	0.0	0.0	0.0	0.0	0.0	0.0	0.0	0.0	0.0	0.0	0.0	0.0
HNRNPUL2	221092	symbol	H. sapiens	221092	H. sapiens	HNRNPUL2	heterogeneous nuclear ribonucleoprotein U like 2	GO:0008150 biological_process			Nucleoplasm(Enhanced)				0.0	0.0	0.0	0.0	0.0	0.0	0.0	0.0	0.0	0.0	0.0	0.0	0.0	0.0	0.0	0.0	0.0	0.0	0.0	0.0
PPM1M	132160	symbol	H. sapiens	132160	H. sapiens	PPM1M	protein phosphatase, Mg2+/Mn2+ dependent 1M	GO:0006470 protein dephosphorylation;GO:0016311 dephosphorylation;GO:0006796 phosphate-containing compound metabolic process		Enzymes/ENZYME proteins/Hydrolases	Nuclear bodies(Approved)				0.0	0.0	0.0	0.0	0.0	0.0	0.0	0.0	0.0	0.0	0.0	0.0	0.0	0.0	0.0	0.0	0.0	0.0	0.0	0.0
ATF6B	1388	symbol	H. sapiens	1388	H. sapiens	ATF6B	activating transcription factor 6 beta	GO:0036500 ATF6-mediated unfolded protein response;GO:1990440 positive regulation of transcription from RNA polymerase II promoter in response to endoplasmic reticulum stress;GO:0036003 positive regulation of transcription from RNA polymerase II promoter in response to stress		Transcription factors/Basic domains	Nucleoli;Nucleus(Supported)				0.0	0.0	0.0	0.0	0.0	0.0	0.0	0.0	0.0	0.0	0.0	0.0	0.0	0.0	0.0	0.0	0.0	0.0	0.0	0.0
TMC8	147138	symbol	H. sapiens	147138	H. sapiens	TMC8	transmembrane channel like 8	GO:0032460 negative regulation of protein oligomerization;GO:1902041 regulation of extrinsic apoptotic signaling pathway via death domain receptors;GO:0055069 zinc ion homeostasis		Transporters/Transporter channels and pores	Golgi apparatus(Uncertain)				0.0	0.0	0.0	0.0	0.0	0.0	0.0	0.0	0.0	0.0	0.0	0.0	0.0	0.0	0.0	0.0	0.0	1.0	0.0	0.0
C4orf3	401152	symbol	H. sapiens	401152	H. sapiens	C4orf3	chromosome 4 open reading frame 3				Endoplasmic reticulum(Approved)				0.0	0.0	0.0	0.0	0.0	0.0	0.0	0.0	0.0	0.0	0.0	0.0	0.0	0.0	0.0	0.0	0.0	0.0	0.0	0.0
FCGR1A	2209	symbol	H. sapiens	2209	H. sapiens	FCGR1A	Fc fragment of IgG receptor Ia	GO:0038096 Fc-gamma receptor signaling pathway involved in phagocytosis;GO:0002479 antigen processing and presentation of exogenous peptide antigen via MHC class I, TAP-dependent;GO:0002431 Fc receptor mediated stimulatory signaling pathway		CD markers		Cetuximab (Receptor signaling protein activity);Etanercept (Receptor signaling protein activity);Immune Globulin Human (Receptor signaling protein activity);Adalimumab (Receptor signaling protein activity);Abciximab (Receptor signaling protein activity);Gemtuzumab ozogamicin (Receptor signaling protein activity);Trastuzumab (Receptor signaling protein activity);Rituximab (Receptor signaling prote…		(M5913)HALLMARK INTERFERON GAMMA RESPONSE	0.0	0.0	1.0	0.0	0.0	1.0	1.0	0.0	0.0	1.0	0.0	1.0	0.0	0.0	0.0	0.0	0.0	0.0	1.0	0.0
CNPPD1	27013	symbol	H. sapiens	27013	H. sapiens	CNPPD1	cyclin Pas1/PHO80 domain containing 1	GO:0000079 regulation of cyclin-dependent protein serine/threonine kinase activity;GO:1904029 regulation of cyclin-dependent protein kinase activity;GO:0071900 regulation of protein serine/threonine kinase activity							0.0	0.0	0.0	0.0	0.0	0.0	0.0	0.0	0.0	0.0	0.0	0.0	0.0	0.0	0.0	0.0	0.0	0.0	0.0	0.0
NLRP6	171389	symbol	H. sapiens	171389	H. sapiens	NLRP6	NLR family pyrin domain containing 6	GO:0034122 negative regulation of toll-like receptor signaling pathway;GO:0034121 regulation of toll-like receptor signaling pathway;GO:0002862 negative regulation of inflammatory response to antigenic stimulus							0.0	0.0	0.0	1.0	1.0	0.0	1.0	0.0	0.0	0.0	0.0	0.0	0.0	0.0	0.0	0.0	0.0	0.0	0.0	1.0
FRAT1	10023	symbol	H. sapiens	10023	H. sapiens	FRAT1	FRAT1, WNT signaling pathway regulator	GO:1904886 beta-catenin destruction complex disassembly;GO:0060070 canonical Wnt signaling pathway;GO:0032984 protein-containing complex disassembly			Cytosol;Vesicles(Approved)		(M17761)ST WNT BETA CATENIN PATHWAY; (M70)PID PS1 PATHWAY; (M5493)WNT SIGNALING	(M5895)HALLMARK WNT BETA CATENIN SIGNALING	0.0	0.0	0.0	0.0	0.0	0.0	0.0	0.0	0.0	0.0	0.0	0.0	0.0	0.0	0.0	0.0	0.0	0.0	0.0	0.0
VPS35	55737	symbol	H. sapiens	55737	H. sapiens	VPS35	VPS35, retromer complex component	GO:1903181 positive regulation of dopamine biosynthetic process;GO:0099639 neurotransmitter receptor transport, endosome to plasma membrane;GO:1905166 negative regulation of lysosomal protein catabolic process			Endosomes;Lysosomes(Supported)				0.0	0.0	0.0	1.0	0.0	0.0	0.0	0.0	0.0	0.0	0.0	0.0	0.0	0.0	0.0	0.0	0.0	1.0	0.0	0.0
ARHGEF6	9459	symbol	H. sapiens	9459	H. sapiens	ARHGEF6	Rac/Cdc42 guanine nucleotide exchange factor 6	GO:0030032 lamellipodium assembly;GO:0007254 JNK cascade;GO:0035023 regulation of Rho protein signal transduction			Cytosol(Approved)		(M83)PID CDC42 REG PATHWAY; (M241)PID RAC1 REG PATHWAY; (M71)PID ILK PATHWAY	(M5915)HALLMARK APICAL JUNCTION	0.0	0.0	0.0	0.0	0.0	0.0	0.0	0.0	1.0	0.0	0.0	0.0	1.0	0.0	0.0	0.0	0.0	0.0	0.0	0.0
SAMHD1	25939	symbol	H. sapiens	25939	H. sapiens	SAMHD1	SAM and HD domain containing deoxynucleoside triphosphate triphosphohydrolase 1	GO:0046061 dATP catabolic process;GO:0006203 dGTP catabolic process;GO:0046060 dATP metabolic process			Nucleoplasm(Supported)Plasma membrane(Approved)			(M5913)HALLMARK INTERFERON GAMMA RESPONSE	0.0	0.0	0.0	1.0	0.0	0.0	0.0	0.0	0.0	1.0	0.0	0.0	0.0	0.0	0.0	0.0	0.0	1.0	0.0	0.0
NLRP12	91662	symbol	H. sapiens	91662	H. sapiens	NLRP12	NLR family pyrin domain containing 12	GO:0008588 release of cytoplasmic sequestered NF-kappaB;GO:0007253 cytoplasmic sequestering of NF-kappaB;GO:0045381 regulation of interleukin-18 biosynthetic process							0.0	0.0	0.0	1.0	0.0	0.0	0.0	0.0	1.0	0.0	0.0	0.0	0.0	0.0	0.0	0.0	0.0	0.0	0.0	0.0
RCN3	57333	symbol	H. sapiens	57333	H. sapiens	RCN3	reticulocalbin 3				Endoplasmic reticulum;Vesicles(Approved)				0.0	0.0	0.0	0.0	0.0	0.0	0.0	0.0	0.0	0.0	0.0	0.0	0.0	0.0	0.0	0.0	0.0	0.0	0.0	0.0
LTBR	4055	symbol	H. sapiens	4055	H. sapiens	LTBR	lymphotoxin beta receptor	GO:0043011 myeloid dendritic cell differentiation;GO:0046330 positive regulation of JNK cascade;GO:2001238 positive regulation of extrinsic apoptotic signaling pathway			Golgi apparatus(Supported)			(M5897)HALLMARK IL6 JAK STAT3 SIGNALING	1.0	1.0	0.0	1.0	0.0	0.0	0.0	0.0	1.0	1.0	0.0	0.0	0.0	0.0	1.0	0.0	1.0	0.0	0.0	0.0
APC	324	symbol	H. sapiens	324	H. sapiens	APC	APC, WNT signaling pathway regulator	GO:1904781 positive regulation of protein localization to centrosome;GO:0007094 mitotic spindle assembly checkpoint;GO:1904779 regulation of protein localization to centrosome					(M31)PID BETA CATENIN DEG PATHWAY; (M90)PID WNT CANONICAL PATHWAY; (M2701)ST MYOCYTE AD PATHWAY	(M5896)HALLMARK TGF BETA SIGNALING; (M5893)HALLMARK MITOTIC SPINDLE	0.0	0.0	0.0	0.0	0.0	0.0	0.0	0.0	1.0	0.0	0.0	0.0	0.0	0.0	0.0	0.0	0.0	1.0	0.0	0.0
NUB1	51667	symbol	H. sapiens	51667	H. sapiens	NUB1	negative regulator of ubiquitin like proteins 1	GO:0032436 positive regulation of proteasomal ubiquitin-dependent protein catabolic process;GO:2000060 positive regulation of ubiquitin-dependent protein catabolic process;GO:1901800 positive regulation of proteasomal protein catabolic process			Nucleoli;Nucleus(Enhanced)			(M5911)HALLMARK INTERFERON ALPHA RESPONSE	0.0	0.0	1.0	0.0	0.0	0.0	0.0	0.0	1.0	0.0	0.0	0.0	0.0	0.0	0.0	0.0	0.0	0.0	0.0	0.0
SRXN1	140809	symbol	H. sapiens	140809	H. sapiens	SRXN1	sulfiredoxin 1	GO:0098869 cellular oxidant detoxification;GO:1990748 cellular detoxification;GO:0098754 detoxification		Enzymes/ENZYME proteins/Oxidoreductases				(M5938)HALLMARK REACTIVE OXIGEN SPECIES PATHWAY	0.0	0.0	0.0	0.0	0.0	0.0	0.0	0.0	0.0	0.0	0.0	0.0	0.0	0.0	0.0	0.0	0.0	0.0	0.0	0.0
GDE1	51573	symbol	H. sapiens	51573	H. sapiens	GDE1	glycerophosphodiester phosphodiesterase 1	GO:0070291 N-acylethanolamine metabolic process;GO:0042439 ethanolamine-containing compound metabolic process;GO:0046475 glycerophospholipid catabolic process		Enzymes/ENZYME proteins/Hydrolases	Nucleoli;Nucleus;Vesicles(Approved)			(M5945)HALLMARK HEME METABOLISM	0.0	0.0	0.0	0.0	0.0	0.0	0.0	0.0	0.0	0.0	0.0	0.0	0.0	0.0	0.0	0.0	0.0	0.0	0.0	0.0
USF1	7391	symbol	H. sapiens	7391	H. sapiens	USF1	upstream transcription factor 1	GO:0000432 positive regulation of transcription from RNA polymerase II promoter by glucose;GO:0051918 negative regulation of fibrinolysis;GO:0046016 positive regulation of transcription by glucose		Transcription factors/Basic domains	Nucleoplasm(Enhanced)		(M229)PID P38 ALPHA BETA DOWNSTREAM PATHWAY		0.0	0.0	0.0	1.0	0.0	0.0	0.0	0.0	0.0	0.0	0.0	0.0	0.0	0.0	0.0	0.0	1.0	0.0	0.0	0.0
SLC40A1	30061	symbol	H. sapiens	30061	H. sapiens	SLC40A1	solute carrier family 40 member 1	GO:1903988 ferrous iron export across plasma membrane;GO:1903414 iron cation export;GO:0060345 spleen trabecula formation		Transporters/Electrochemical Potential-driven transporters	Plasma membrane(Supported)Cytosol;Nucleoplasm(Approved)				0.0	0.0	0.0	0.0	0.0	0.0	0.0	0.0	0.0	0.0	0.0	0.0	0.0	0.0	0.0	0.0	0.0	0.0	0.0	0.0
FCHO2	115548	symbol	H. sapiens	115548	H. sapiens	FCHO2	FCH domain only 2	GO:0072583 clathrin-dependent endocytosis;GO:0048268 clathrin coat assembly;GO:0048488 synaptic vesicle endocytosis			Centrosome;Cytosol;Vesicles(Approved)				0.0	0.0	0.0	0.0	0.0	0.0	0.0	0.0	0.0	0.0	0.0	0.0	0.0	0.0	0.0	0.0	0.0	0.0	0.0	0.0
PRR14L	253143	symbol	H. sapiens	253143	H. sapiens	PRR14L	proline rich 14 like				Nucleoplasm(Approved)				0.0	0.0	0.0	0.0	0.0	0.0	0.0	0.0	0.0	0.0	0.0	0.0	0.0	0.0	0.0	0.0	0.0	0.0	0.0	0.0
JADE1	79960	symbol	H. sapiens	79960	H. sapiens	JADE1	jade family PHD finger 1	GO:0043983 histone H4-K12 acetylation;GO:0043982 histone H4-K8 acetylation;GO:0043981 histone H4-K5 acetylation			Mitochondria(Approved)				0.0	0.0	0.0	0.0	0.0	0.0	0.0	1.0	0.0	0.0	0.0	0.0	0.0	0.0	0.0	0.0	0.0	0.0	0.0	0.0
ADAM19	8728	symbol	H. sapiens	8728	H. sapiens	ADAM19	ADAM metallopeptidase domain 19	GO:0006509 membrane protein ectodomain proteolysis;GO:0033619 membrane protein proteolysis;GO:0030198 extracellular matrix organization			Vesicles(Approved)		(M3468)NABA ECM REGULATORS; (M5885)NABA MATRISOME ASSOCIATED; (M5889)NABA MATRISOME	(M5947)HALLMARK IL2 STAT5 SIGNALING	0.0	0.0	0.0	0.0	0.0	0.0	0.0	0.0	0.0	0.0	0.0	0.0	0.0	0.0	0.0	0.0	0.0	0.0	0.0	0.0
STK38	11329	symbol	H. sapiens	11329	H. sapiens	STK38	serine/threonine kinase 38	GO:0043407 negative regulation of MAP kinase activity;GO:0071901 negative regulation of protein serine/threonine kinase activity;GO:0043409 negative regulation of MAPK cascade	AGC Ser/Thr protein kinase family	Enzymes/{ENZYME proteins/Transferases,Kinases/AGC Ser/Thr protein kinases}	Cytosol(Approved)				0.0	0.0	0.0	0.0	0.0	0.0	0.0	0.0	0.0	0.0	0.0	0.0	0.0	0.0	0.0	0.0	0.0	0.0	0.0	0.0
NACC1	112939	symbol	H. sapiens	112939	H. sapiens	NACC1	nucleus accumbens associated 1	GO:0051260 protein homooligomerization;GO:0045892 negative regulation of transcription, DNA-templated;GO:0051259 protein complex oligomerization			Nucleoplasm(Enhanced)				0.0	0.0	0.0	0.0	0.0	0.0	0.0	0.0	0.0	0.0	0.0	0.0	0.0	0.0	0.0	0.0	0.0	1.0	0.0	0.0
TBKBP1	9755	symbol	H. sapiens	9755	H. sapiens	TBKBP1	TBK1 binding protein 1	GO:0016032 viral process;GO:0044403 symbiont process;GO:0044419 interspecies interaction between organisms			Nucleoplasm(Approved)				0.0	0.0	0.0	0.0	0.0	0.0	0.0	0.0	0.0	0.0	0.0	0.0	0.0	0.0	0.0	0.0	1.0	0.0	0.0	0.0
CBX7	23492	symbol	H. sapiens	23492	H. sapiens	CBX7	chromobox 7	GO:0000122 negative regulation of transcription by RNA polymerase II;GO:0045892 negative regulation of transcription, DNA-templated;GO:0016569 covalent chromatin modification			Cytosol;Nucleoplasm(Supported)				0.0	0.0	0.0	0.0	0.0	0.0	0.0	1.0	0.0	0.0	0.0	0.0	0.0	0.0	0.0	0.0	0.0	0.0	0.0	0.0
BCL2L11	10018	symbol	H. sapiens	10018	H. sapiens	BCL2L11	BCL2 like 11	GO:0060139 positive regulation of apoptotic process by virus;GO:0052151 positive regulation by symbiont of host apoptotic process;GO:0052501 positive regulation by organism of apoptotic process in other organism involved in symbiotic interaction		Transporters/Accessory Factors Involved in Transport			(M13096)SA PROGRAMMED CELL DEATH; (M136)PID FOXO PATHWAY; (M153)PID P75 NTR PATHWAY	(M5941)HALLMARK UV RESPONSE UP; (M5902)HALLMARK APOPTOSIS; (M5893)HALLMARK MITOTIC SPINDLE	0.0	0.0	0.0	0.0	0.0	0.0	0.0	0.0	1.0	0.0	0.0	0.0	0.0	0.0	0.0	0.0	1.0	1.0	0.0	0.0
NACC2	138151	symbol	H. sapiens	138151	H. sapiens	NACC2	NACC family member 2	GO:1900477 negative regulation of G1/S transition of mitotic cell cycle by negative regulation of transcription from RNA polymerase II promoter;GO:1902231 positive regulation of intrinsic apoptotic signaling pathway in response to DNA damage;GO:1902229 regulation of intrinsic apoptotic signaling pathway in response to DNA damage			Mitochondria;Nucleoli(Approved)				0.0	0.0	0.0	0.0	0.0	0.0	0.0	1.0	1.0	0.0	0.0	0.0	0.0	0.0	0.0	0.0	0.0	1.0	0.0	0.0
HSDL2	84263	symbol	H. sapiens	84263	H. sapiens	HSDL2	hydroxysteroid dehydrogenase like 2	GO:0055114 oxidation-reduction process;GO:0008152 metabolic process;GO:0008150 biological_process			Mitochondria(Supported)			(M5935)HALLMARK FATTY ACID METABOLISM	0.0	0.0	0.0	0.0	0.0	0.0	0.0	0.0	0.0	0.0	0.0	0.0	0.0	0.0	0.0	0.0	0.0	0.0	0.0	0.0
LMBRD1	55788	symbol	H. sapiens	55788	H. sapiens	LMBRD1	LMBR1 domain containing 1	GO:0046325 negative regulation of glucose import;GO:0038016 insulin receptor internalization;GO:0010829 negative regulation of glucose transmembrane transport		Transporters					0.0	0.0	0.0	0.0	0.0	0.0	0.0	0.0	0.0	0.0	0.0	0.0	0.0	0.0	0.0	0.0	1.0	0.0	0.0	0.0
ZNF148	7707	symbol	H. sapiens	7707	H. sapiens	ZNF148	zinc finger protein 148	GO:0021762 substantia nigra development;GO:0006968 cellular defense response;GO:0030901 midbrain development		Transcription factors/Zinc-coordinating DNA-binding domains	Nucleus(Supported)Golgi apparatus(Uncertain)				0.0	0.0	0.0	0.0	0.0	0.0	0.0	0.0	0.0	0.0	0.0	0.0	0.0	0.0	0.0	0.0	0.0	0.0	0.0	0.0
TRIM21	6737	symbol	H. sapiens	6737	H. sapiens	TRIM21	tripartite motif containing 21	GO:1902187 negative regulation of viral release from host cell;GO:0046598 positive regulation of viral entry into host cell;GO:1902186 regulation of viral release from host cell		Enzymes/ENZYME proteins/Transferases	Nucleoplasm(Approved)			(M5911)HALLMARK INTERFERON ALPHA RESPONSE; (M5913)HALLMARK INTERFERON GAMMA RESPONSE	0.0	0.0	1.0	1.0	0.0	0.0	0.0	0.0	0.0	1.0	0.0	0.0	0.0	0.0	0.0	0.0	1.0	1.0	0.0	0.0
THOC5	8563	symbol	H. sapiens	8563	H. sapiens	THOC5	THO complex 5	GO:2000002 negative regulation of DNA damage checkpoint;GO:0046784 viral mRNA export from host cell nucleus;GO:0044417 translocation of molecules into host			Nucleoplasm(Supported)				0.0	1.0	0.0	0.0	0.0	0.0	0.0	0.0	0.0	0.0	0.0	0.0	0.0	0.0	1.0	0.0	1.0	0.0	0.0	0.0
TRAPPC1	58485	symbol	H. sapiens	58485	H. sapiens	TRAPPC1	trafficking protein particle complex 1	GO:0048208 COPII vesicle coating;GO:0048207 vesicle targeting, rough ER to cis-Golgi;GO:0048199 vesicle targeting, to, from or within Golgi				S-PALMITOYL-L-CYSTEINE (Rab guanyl-nucleotide exchange factor activity)			1.0	0.0	0.0	0.0	0.0	0.0	0.0	0.0	0.0	0.0	0.0	0.0	0.0	0.0	0.0	0.0	0.0	0.0	0.0	0.0
CD177	57126	symbol	H. sapiens	57126	H. sapiens	CD177	CD177 molecule	GO:0043315 positive regulation of neutrophil degranulation;GO:1902565 positive regulation of neutrophil activation;GO:0043313 regulation of neutrophil degranulation							1.0	1.0	0.0	0.0	0.0	0.0	1.0	0.0	0.0	0.0	0.0	0.0	0.0	0.0	0.0	0.0	0.0	0.0	0.0	1.0
RCBTB2	1102	symbol	H. sapiens	1102	H. sapiens	RCBTB2	RCC1 and BTB domain containing protein 2	GO:0065009 regulation of molecular function;GO:0065007 biological regulation;GO:0008150 biological_process			Golgi apparatus;Nucleus(Approved)				0.0	0.0	0.0	0.0	0.0	0.0	0.0	0.0	0.0	0.0	0.0	0.0	0.0	0.0	0.0	0.0	0.0	0.0	0.0	0.0
FUT7	2529	symbol	H. sapiens	2529	H. sapiens	FUT7	fucosyltransferase 7	GO:0002361 CD4-positive, CD25-positive, alpha-beta regulatory T cell differentiation;GO:0042355 L-fucose catabolic process;GO:0019317 fucose catabolic process			Golgi apparatus(Approved)				0.0	1.0	0.0	0.0	0.0	0.0	0.0	0.0	0.0	0.0	0.0	0.0	0.0	0.0	0.0	1.0	0.0	0.0	0.0	0.0
PIP4K2A	5305	symbol	H. sapiens	5305	H. sapiens	PIP4K2A	phosphatidylinositol-5-phosphate 4-kinase type 2 alpha	GO:2000786 positive regulation of autophagosome assembly;GO:0035855 megakaryocyte development;GO:0044090 positive regulation of vacuole organization		Enzymes/ENZYME proteins/Transferases	Cytosol;Plasma membrane(Supported)Golgi apparatus(Approved)				0.0	0.0	0.0	0.0	0.0	0.0	0.0	0.0	0.0	0.0	0.0	0.0	0.0	0.0	1.0	0.0	0.0	0.0	0.0	0.0
TGFA	7039	symbol	H. sapiens	7039	H. sapiens	TGFA	transforming growth factor alpha	GO:0045741 positive regulation of epidermal growth factor-activated receptor activity;GO:0048208 COPII vesicle coating;GO:0007176 regulation of epidermal growth factor-activated receptor activity			Vesicles(Approved)		(M201)PID ERBB NETWORK PATHWAY; (M176)PID FOXM1 PATHWAY; (M145)PID P53 DOWNSTREAM PATHWAY	(M5937)HALLMARK GLYCOLYSIS; (M5939)HALLMARK P53 PATHWAY	0.0	0.0	0.0	0.0	0.0	0.0	0.0	0.0	0.0	0.0	0.0	0.0	0.0	0.0	0.0	0.0	0.0	0.0	0.0	0.0
PAPSS1	9061	symbol	H. sapiens	9061	H. sapiens	PAPSS1	3'-phosphoadenosine 5'-phosphosulfate synthase 1	GO:0050428 3'-phosphoadenosine 5'-phosphosulfate biosynthetic process;GO:0034036 purine ribonucleoside bisphosphate biosynthetic process;GO:0050427 3'-phosphoadenosine 5'-phosphosulfate metabolic process		Enzymes/ENZYME proteins/Transferases	Nucleoli;Nucleus(Approved)	Adenosine-5'-Diphosphate-2',3'-Vanadate (Sulfate adenylyltransferase (atp) activity);Adenosine-5'-Phosphosulfate (Sulfate adenylyltransferase (atp) activity);Glycerol (Sulfate adenylyltransferase (atp) activity)			0.0	0.0	0.0	0.0	0.0	0.0	0.0	0.0	0.0	0.0	0.0	0.0	0.0	0.0	0.0	0.0	0.0	0.0	0.0	0.0
MAP2K4	6416	symbol	H. sapiens	6416	H. sapiens	MAP2K4	mitogen-activated protein kinase kinase 4	GO:2000672 negative regulation of motor neuron apoptotic process;GO:0007257 activation of JUN kinase activity;GO:0072709 cellular response to sorbitol	STE Ser/Thr protein kinase family	Enzymes/{ENZYME proteins/Transferases,Kinases/STE Ser/Thr protein kinases}	Cell Junctions;Nucleoplasm(Approved)		(M190)PID TCR JNK PATHWAY; (M267)PID ANTHRAX PATHWAY; (M274)PID LYMPH ANGIOGENESIS PATHWAY		0.0	0.0	0.0	0.0	0.0	0.0	1.0	0.0	1.0	1.0	0.0	0.0	1.0	0.0	0.0	0.0	0.0	0.0	0.0	0.0
TWF2	11344	symbol	H. sapiens	11344	H. sapiens	TWF2	twinfilin actin binding protein 2	GO:0051016 barbed-end actin filament capping;GO:0042989 sequestering of actin monomers;GO:0045773 positive regulation of axon extension			Plasma membrane(Supported)				0.0	0.0	0.0	0.0	0.0	0.0	0.0	0.0	0.0	0.0	0.0	0.0	0.0	0.0	0.0	0.0	0.0	0.0	0.0	0.0
SLC25A28	81894	symbol	H. sapiens	81894	H. sapiens	SLC25A28	solute carrier family 25 member 28	GO:0048250 iron import into the mitochondrion;GO:0097286 iron ion import;GO:0034755 iron ion transmembrane transport		Transporters/Electrochemical Potential-driven transporters				(M5911)HALLMARK INTERFERON ALPHA RESPONSE; (M5913)HALLMARK INTERFERON GAMMA RESPONSE	0.0	0.0	0.0	0.0	0.0	0.0	0.0	0.0	0.0	0.0	0.0	0.0	0.0	0.0	0.0	0.0	0.0	0.0	0.0	0.0
NEK7	140609	symbol	H. sapiens	140609	H. sapiens	NEK7	NIMA related kinase 7	GO:0032212 positive regulation of telomere maintenance via telomerase;GO:1904355 positive regulation of telomere capping;GO:1904358 positive regulation of telomere maintenance via telomere lengthening	NEK Ser/Thr protein kinase family	Enzymes/{ENZYME proteins/Transferases,Kinases/NEK Ser/Thr protein kinases};Transporters/Transporter channels and pores	Nucleoplasm(Supported)			(M5942)HALLMARK UV RESPONSE DN; (M5945)HALLMARK HEME METABOLISM	0.0	0.0	0.0	0.0	0.0	0.0	0.0	0.0	0.0	0.0	0.0	0.0	1.0	0.0	0.0	0.0	0.0	0.0	0.0	0.0
NUDT16	131870	symbol	H. sapiens	131870	H. sapiens	NUDT16	nudix hydrolase 16	GO:1901639 XDP catabolic process;GO:0035863 dITP catabolic process;GO:0046709 IDP catabolic process		Enzymes/ENZYME proteins/Hydrolases	Nucleoli;Nucleus(Supported)				0.0	0.0	0.0	0.0	0.0	0.0	0.0	0.0	0.0	0.0	0.0	0.0	0.0	0.0	0.0	0.0	0.0	0.0	0.0	0.0
VAMP3	9341	symbol	H. sapiens	9341	H. sapiens	VAMP3	vesicle associated membrane protein 3	GO:1903593 regulation of histamine secretion by mast cell;GO:0002553 histamine secretion by mast cell;GO:0051024 positive regulation of immunoglobulin secretion					(M67)PID ARF6 TRAFFICKING PATHWAY	(M5910)HALLMARK PROTEIN SECRETION	1.0	1.0	1.0	1.0	0.0	0.0	0.0	0.0	0.0	0.0	0.0	0.0	0.0	0.0	0.0	0.0	0.0	0.0	0.0	1.0
ZNF33A	7581	symbol	H. sapiens	7581	H. sapiens	ZNF33A	zinc finger protein 33A	GO:0006355 regulation of transcription, DNA-templated;GO:1903506 regulation of nucleic acid-templated transcription;GO:0006351 transcription, DNA-templated		Transcription factors/Zinc-coordinating DNA-binding domains					0.0	0.0	0.0	0.0	0.0	0.0	0.0	0.0	0.0	0.0	0.0	0.0	0.0	0.0	0.0	0.0	0.0	0.0	0.0	0.0
ERO1A	30001	symbol	H. sapiens	30001	H. sapiens	ERO1A	endoplasmic reticulum oxidoreductase 1 alpha	GO:0051209 release of sequestered calcium ion into cytosol;GO:0010260 animal organ senescence;GO:0097553 calcium ion transmembrane import into cytosol						(M5922)HALLMARK UNFOLDED PROTEIN RESPONSE; (M5953)HALLMARK KRAS SIGNALING UP; (M5924)HALLMARK MTORC1 SIGNALING	0.0	0.0	0.0	0.0	0.0	0.0	0.0	0.0	0.0	0.0	0.0	0.0	1.0	0.0	0.0	0.0	0.0	0.0	0.0	0.0
DHRS13	147015	symbol	H. sapiens	147015	H. sapiens	DHRS13	dehydrogenase/reductase 13	GO:0055114 oxidation-reduction process;GO:0008152 metabolic process;GO:0008150 biological_process			Vesicles(Approved)				0.0	0.0	0.0	0.0	0.0	0.0	0.0	0.0	0.0	0.0	0.0	0.0	0.0	0.0	0.0	0.0	0.0	0.0	0.0	0.0
NAA60	79903	symbol	H. sapiens	79903	H. sapiens	NAA60	N(alpha)-acetyltransferase 60, NatF catalytic subunit	GO:0017196 N-terminal peptidyl-methionine acetylation;GO:0043967 histone H4 acetylation;GO:0006474 N-terminal protein amino acid acetylation		Enzymes/ENZYME proteins/Transferases	Actin filaments;Cytosol(Uncertain)				0.0	0.0	0.0	0.0	0.0	0.0	0.0	1.0	0.0	0.0	0.0	0.0	0.0	0.0	0.0	0.0	0.0	0.0	0.0	0.0
DPF2	5977	symbol	H. sapiens	5977	H. sapiens	DPF2	double PHD fingers 2	GO:0097190 apoptotic signaling pathway;GO:0006915 apoptotic process;GO:0012501 programmed cell death			Nucleoplasm(Supported)				0.0	0.0	0.0	0.0	0.0	0.0	0.0	0.0	0.0	0.0	0.0	0.0	0.0	0.0	0.0	0.0	0.0	0.0	0.0	0.0
CHMP3	51652	symbol	H. sapiens	51652	H. sapiens	CHMP3	charged multivesicular body protein 3	GO:1902187 negative regulation of viral release from host cell;GO:1902188 positive regulation of viral release from host cell;GO:0061763 multivesicular body-lysosome fusion					(M214)PID ERBB1 INTERNALIZATION PATHWAY		0.0	0.0	0.0	0.0	0.0	0.0	0.0	0.0	0.0	0.0	0.0	0.0	1.0	0.0	0.0	0.0	1.0	1.0	0.0	0.0
SMARCC2	6601	symbol	H. sapiens	6601	H. sapiens	SMARCC2	SWI/SNF related, matrix associated, actin dependent regulator of chromatin subfamily c member 2	GO:0006337 nucleosome disassembly;GO:0031498 chromatin disassembly;GO:0032986 protein-DNA complex disassembly		Transcription factors/Helix-turn-helix domains	Nucleoplasm(Enhanced)		(M115)PID REG GR PATHWAY		0.0	0.0	0.0	0.0	0.0	0.0	0.0	1.0	0.0	0.0	0.0	0.0	0.0	0.0	0.0	0.0	0.0	0.0	0.0	0.0
MT2A	4502	symbol	H. sapiens	4502	H. sapiens	MT2A	metallothionein 2A	GO:0036016 cellular response to interleukin-3;GO:0006878 cellular copper ion homeostasis;GO:0036018 cellular response to erythropoietin					(M167)PID AP1 PATHWAY	(M5913)HALLMARK INTERFERON GAMMA RESPONSE; (M5901)HALLMARK G2M CHECKPOINT; (M5934)HALLMARK XENOBIOTIC METABOLISM	0.0	0.0	0.0	0.0	0.0	0.0	0.0	0.0	0.0	1.0	0.0	0.0	1.0	0.0	0.0	0.0	0.0	0.0	0.0	0.0
YIPF1	54432	symbol	H. sapiens	54432	H. sapiens	YIPF1	Yip1 domain family member 1				Nucleoplasm(Approved)				0.0	0.0	0.0	0.0	0.0	0.0	0.0	0.0	0.0	0.0	0.0	0.0	0.0	0.0	0.0	0.0	0.0	0.0	0.0	0.0
C7orf43	55262	symbol	H. sapiens	55262	H. sapiens	C7orf43	chromosome 7 open reading frame 43				Microtubule organizing center;Vesicles(Enhanced)Plasma membrane(Approved)				0.0	0.0	0.0	0.0	0.0	0.0	0.0	0.0	0.0	0.0	0.0	0.0	0.0	0.0	0.0	0.0	0.0	0.0	0.0	0.0
EMILIN2	84034	symbol	H. sapiens	84034	H. sapiens	EMILIN2	elastin microfibril interfacer 2	GO:0007155 cell adhesion;GO:0022610 biological adhesion;GO:0008150 biological_process					(M3008)NABA ECM GLYCOPROTEINS; (M5884)NABA CORE MATRISOME; (M5889)NABA MATRISOME		0.0	0.0	0.0	0.0	0.0	0.0	0.0	0.0	0.0	0.0	0.0	0.0	0.0	0.0	0.0	0.0	0.0	0.0	0.0	0.0
KIDINS220	57498	symbol	H. sapiens	57498	H. sapiens	KIDINS220	kinase D interacting substrate 220	GO:0038180 nerve growth factor signaling pathway;GO:0000186 activation of MAPKK activity;GO:0038179 neurotrophin signaling pathway			Nucleoplasm(Approved)				0.0	0.0	0.0	0.0	0.0	0.0	0.0	0.0	0.0	0.0	0.0	0.0	0.0	0.0	0.0	0.0	0.0	0.0	0.0	0.0
KLF4	9314	symbol	H. sapiens	9314	H. sapiens	KLF4	Kruppel like factor 4	GO:1904998 negative regulation of leukocyte adhesion to arterial endothelial cell;GO:0007500 mesodermal cell fate determination;GO:0014740 negative regulation of muscle hyperplasia		Transcription factors/Zinc-coordinating DNA-binding domains	Nucleoplasm(Supported)		(M223)PID BETA CATENIN NUC PATHWAY	(M5953)HALLMARK KRAS SIGNALING UP; (M5890)HALLMARK TNFA SIGNALING VIA NFKB; (M5907)HALLMARK ESTROGEN RESPONSE LATE	0.0	1.0	0.0	1.0	1.0	0.0	0.0	0.0	1.0	0.0	0.0	0.0	0.0	0.0	0.0	0.0	0.0	0.0	0.0	0.0
ATG9A	79065	symbol	H. sapiens	79065	H. sapiens	ATG9A	autophagy related 9A	GO:0034497 protein localization to phagophore assembly site;GO:0044805 late nucleophagy;GO:0044804 autophagy of nucleus			Vesicles(Supported)				0.0	0.0	0.0	0.0	0.0	0.0	0.0	0.0	0.0	0.0	0.0	0.0	1.0	0.0	0.0	0.0	0.0	0.0	0.0	0.0
CHPF2	54480	symbol	H. sapiens	54480	H. sapiens	CHPF2	chondroitin polymerizing factor 2	GO:0030206 chondroitin sulfate biosynthetic process;GO:0050650 chondroitin sulfate proteoglycan biosynthetic process;GO:0030204 chondroitin sulfate metabolic process		Enzymes/ENZYME proteins/Transferases	Cytosol;Nucleoplasm(Approved)			(M5937)HALLMARK GLYCOLYSIS	0.0	0.0	0.0	0.0	0.0	0.0	0.0	0.0	0.0	0.0	0.0	0.0	0.0	0.0	0.0	0.0	0.0	0.0	0.0	0.0
PAM	5066	symbol	H. sapiens	5066	H. sapiens	PAM	peptidylglycine alpha-amidating monooxygenase	GO:0001519 peptide amidation;GO:0018032 protein amidation;GO:0031179 peptide modification		Enzymes/ENZYME proteins/{Lyases,Oxidoreductases}	Cytosol;Golgi apparatus(Approved)	Vitamin C (Zinc ion binding);N-Alpha-Acetyl-3,5-Diiodotyrosylglycine (Zinc ion binding);Threonine Derivative (Zinc ion binding)		(M5910)HALLMARK PROTEIN SECRETION; (M5937)HALLMARK GLYCOLYSIS; (M5891)HALLMARK HYPOXIA	0.0	0.0	0.0	0.0	0.0	0.0	0.0	0.0	0.0	0.0	0.0	0.0	0.0	0.0	0.0	0.0	0.0	1.0	0.0	0.0
OAS2	4939	symbol	H. sapiens	4939	H. sapiens	OAS2	2'-5'-oligoadenylate synthetase 2	GO:0018377 protein myristoylation;GO:0060337 type I interferon signaling pathway;GO:0060333 interferon-gamma-mediated signaling pathway		Enzymes/ENZYME proteins/Transferases	Cytosol;Nucleoplasm(Approved)			(M5913)HALLMARK INTERFERON GAMMA RESPONSE	0.0	0.0	0.0	0.0	0.0	0.0	0.0	1.0	0.0	1.0	0.0	0.0	0.0	0.0	0.0	0.0	0.0	0.0	0.0	0.0
CA4	762	symbol	H. sapiens	762	H. sapiens	CA4	carbonic anhydrase 4	GO:0015701 bicarbonate transport;GO:0006730 one-carbon metabolic process;GO:0015711 organic anion transport		Enzymes/ENZYME proteins/Lyases	Vesicles(Supported)	Methyclothiazide (Zinc ion binding);Topiramate (Zinc ion binding);Ethoxzolamide (Zinc ion binding);Bendroflumethiazide (Zinc ion binding);Benzthiazide (Zinc ion binding);Cyclothiazide (Zinc ion binding);Methazolamide (Zinc ion binding);Hydroflumethiazide (Zinc ion binding);Acetazolamide (Zinc ion binding);Dorzolamide (Zinc ion binding);Chlorothiazide (Zinc ion binding);Zonisamide (Zinc ion bindin…		(M5935)HALLMARK FATTY ACID METABOLISM	0.0	0.0	0.0	0.0	0.0	0.0	0.0	0.0	0.0	0.0	0.0	0.0	0.0	0.0	0.0	0.0	0.0	0.0	0.0	0.0
CCR3	1232	symbol	H. sapiens	1232	H. sapiens	CCR3	C-C motif chemokine receptor 3	GO:0045766 positive regulation of angiogenesis;GO:0007204 positive regulation of cytosolic calcium ion concentration;GO:0001938 positive regulation of endothelial cell proliferation		CD markers;G-protein coupled receptors/{Chemokines and chemotactic factors receptors,GPCRs excl olfactory receptors}					0.0	0.0	0.0	1.0	0.0	0.0	0.0	0.0	0.0	1.0	0.0	0.0	0.0	0.0	0.0	0.0	1.0	0.0	0.0	0.0
RGS18	64407	symbol	H. sapiens	64407	H. sapiens	RGS18	regulator of G protein signaling 18	GO:0008277 regulation of G-protein coupled receptor protein signaling pathway;GO:0043547 positive regulation of GTPase activity;GO:0043087 regulation of GTPase activity			Golgi apparatus(Approved)				0.0	0.0	0.0	0.0	0.0	0.0	0.0	0.0	1.0	0.0	0.0	0.0	0.0	0.0	0.0	0.0	0.0	0.0	0.0	0.0
BTN3A2	11118	symbol	H. sapiens	11118	H. sapiens	BTN3A2	butyrophilin subfamily 3 member A2	GO:0072643 interferon-gamma secretion;GO:0002456 T cell mediated immunity;GO:0050663 cytokine secretion							0.0	0.0	1.0	1.0	0.0	0.0	0.0	0.0	0.0	0.0	0.0	0.0	0.0	1.0	0.0	0.0	0.0	0.0	0.0	1.0
PTAR1	375743	symbol	H. sapiens	375743	H. sapiens	PTAR1	protein prenyltransferase alpha subunit repeat containing 1	GO:0018342 protein prenylation;GO:0097354 prenylation;GO:0006464 cellular protein modification process			Microtubule organizing center;Rods & Rings(Approved)				0.0	0.0	0.0	0.0	0.0	0.0	0.0	0.0	0.0	0.0	0.0	0.0	0.0	0.0	0.0	0.0	0.0	0.0	0.0	0.0
NPTN	27020	symbol	H. sapiens	27020	H. sapiens	NPTN	neuroplastin	GO:0048170 positive regulation of long-term neuronal synaptic plasticity;GO:1900273 positive regulation of long-term synaptic potentiation;GO:0045743 positive regulation of fibroblast growth factor receptor signaling pathway			Cytokinetic bridge;Mitochondria(Approved)				0.0	1.0	0.0	0.0	0.0	0.0	0.0	0.0	0.0	0.0	0.0	0.0	0.0	0.0	0.0	0.0	0.0	0.0	0.0	0.0
CTNNA1	1495	symbol	H. sapiens	1495	H. sapiens	CTNNA1	catenin alpha 1	GO:2001045 negative regulation of integrin-mediated signaling pathway;GO:2001241 positive regulation of extrinsic apoptotic signaling pathway in absence of ligand;GO:0071681 cellular response to indole-3-methanol			Cell Junctions;Plasma membrane(Enhanced)		(M184)PID ECADHERIN KERATINOCYTE PATHWAY; (M72)PID NECTIN PATHWAY; (M266)PID NCADHERIN PATHWAY	(M5915)HALLMARK APICAL JUNCTION	0.0	1.0	0.0	0.0	0.0	0.0	0.0	0.0	1.0	0.0	0.0	0.0	1.0	0.0	0.0	0.0	0.0	1.0	0.0	0.0
TLR5	7100	symbol	H. sapiens	7100	H. sapiens	TLR5	toll like receptor 5	GO:0034146 toll-like receptor 5 signaling pathway;GO:0034123 positive regulation of toll-like receptor signaling pathway;GO:0002755 MyD88-dependent toll-like receptor signaling pathway			Cytosol;Golgi apparatus;Nucleus(Approved)				0.0	0.0	0.0	1.0	0.0	0.0	1.0	0.0	0.0	0.0	0.0	0.0	0.0	0.0	0.0	0.0	0.0	0.0	0.0	0.0
PPP1R3D	5509	symbol	H. sapiens	5509	H. sapiens	PPP1R3D	protein phosphatase 1 regulatory subunit 3D	GO:0005981 regulation of glycogen catabolic process;GO:0005979 regulation of glycogen biosynthetic process;GO:0005980 glycogen catabolic process			Mitochondria;Nucleoli;Vesicles(Approved)				0.0	0.0	0.0	0.0	0.0	0.0	0.0	0.0	0.0	0.0	0.0	0.0	0.0	0.0	0.0	0.0	0.0	0.0	0.0	0.0
FAM45A	404636	symbol	H. sapiens	404636	H. sapiens	FAM45A	family with sequence similarity 45 member A				Centrosome;Cytosol;Plasma membrane(Approved)				0.0	0.0	0.0	0.0	0.0	0.0	0.0	0.0	0.0	0.0	0.0	0.0	0.0	0.0	0.0	0.0	0.0	0.0	0.0	0.0
ATM	472	symbol	H. sapiens	472	H. sapiens	ATM	ATM serine/threonine kinase	GO:0072434 signal transduction involved in mitotic G2 DNA damage checkpoint;GO:0002331 pre-B cell allelic exclusion;GO:1904884 positive regulation of telomerase catalytic core complex assembly	Atypical: PI3/PI4-kinase family	Enzymes/{ENZYME proteins/Transferases,Kinases/Atypical kinases}	Nucleoplasm(Supported)	Caffeine (Protein serine/threonine kinase activity)	(M37)PID NFKAPPAB CANONICAL PATHWAY; (M20)PID P38 MKK3 6PATHWAY; (M258)PID BARD1 PATHWAY		1.0	1.0	0.0	0.0	1.0	0.0	0.0	1.0	1.0	0.0	0.0	1.0	1.0	0.0	0.0	0.0	0.0	0.0	0.0	0.0
CYP27A1	1593	symbol	H. sapiens	1593	H. sapiens	CYP27A1	cytochrome P450 family 27 subfamily A member 1	GO:0006699 bile acid biosynthetic process;GO:0008206 bile acid metabolic process;GO:0016125 sterol metabolic process		Enzymes/ENZYME proteins/Oxidoreductases	Mitochondria(Enhanced)			(M5948)HALLMARK BILE ACID METABOLISM; (M5934)HALLMARK XENOBIOTIC METABOLISM	0.0	0.0	0.0	0.0	0.0	0.0	0.0	0.0	0.0	0.0	0.0	0.0	0.0	0.0	0.0	0.0	0.0	0.0	0.0	0.0
TRAFD1	10906	symbol	H. sapiens	10906	H. sapiens	TRAFD1	TRAF-type zinc finger domain containing 1	GO:0045824 negative regulation of innate immune response;GO:0050777 negative regulation of immune response;GO:0031348 negative regulation of defense response			Cytosol;Nucleoplasm(Approved)			(M5911)HALLMARK INTERFERON ALPHA RESPONSE; (M5913)HALLMARK INTERFERON GAMMA RESPONSE; (M5939)HALLMARK P53 PATHWAY	0.0	0.0	0.0	1.0	1.0	0.0	0.0	0.0	0.0	0.0	0.0	0.0	0.0	0.0	0.0	0.0	0.0	0.0	0.0	1.0
TRPM6	140803	symbol	H. sapiens	140803	H. sapiens	TRPM6	transient receptor potential cation channel subfamily M member 6	GO:0070588 calcium ion transmembrane transport;GO:0051262 protein tetramerization;GO:0006816 calcium ion transport	Atypical: Alpha-type protein kinase family	Enzymes/{ENZYME proteins/Transferases,Kinases/Atypical kinases};Transporters/Transporter channels and pores;Voltage-gated ion channels/Transient Receptor Potential Channels					0.0	0.0	0.0	0.0	0.0	0.0	0.0	0.0	0.0	0.0	0.0	0.0	0.0	0.0	0.0	0.0	0.0	1.0	0.0	0.0
CPT1B	1375	symbol	H. sapiens	1375	H. sapiens	CPT1B	carnitine palmitoyltransferase 1B	GO:0006853 carnitine shuttle;GO:1902001 fatty acid transmembrane transport;GO:0015909 long-chain fatty acid transport		Enzymes/ENZYME proteins/Transferases			(M106)PID HNF3B PATHWAY		0.0	0.0	0.0	0.0	0.0	0.0	0.0	0.0	0.0	0.0	0.0	0.0	0.0	0.0	0.0	0.0	0.0	0.0	0.0	0.0
STRN	6801	symbol	H. sapiens	6801	H. sapiens	STRN	striatin	GO:0070830 bicellular tight junction assembly;GO:0043297 apical junction assembly;GO:0007043 cell-cell junction assembly			Cytosol;Nucleoplasm(Approved)		(M41)PID ER NONGENOMIC PATHWAY	(M5953)HALLMARK KRAS SIGNALING UP	0.0	0.0	0.0	0.0	0.0	0.0	0.0	0.0	0.0	0.0	0.0	0.0	0.0	0.0	0.0	0.0	0.0	0.0	0.0	0.0
GYG1	2992	symbol	H. sapiens	2992	H. sapiens	GYG1	glycogenin 1	GO:0005980 glycogen catabolic process;GO:0005978 glycogen biosynthetic process;GO:0043312 neutrophil degranulation		Enzymes/ENZYME proteins/Transferases	Vesicles(Supported)	Uridine diphosphate glucose (Metal ion binding);Uridine-5'-Diphosphate (Metal ion binding)			1.0	0.0	0.0	0.0	0.0	0.0	0.0	0.0	0.0	0.0	0.0	0.0	0.0	0.0	0.0	0.0	0.0	0.0	0.0	0.0
TRAPPC8	22878	symbol	H. sapiens	22878	H. sapiens	TRAPPC8	trafficking protein particle complex 8	GO:0034497 protein localization to phagophore assembly site;GO:0032258 protein localization by the Cvt pathway;GO:0030242 autophagy of peroxisome			Cytosol;Microtubules(Approved)				0.0	0.0	0.0	0.0	0.0	0.0	0.0	0.0	0.0	0.0	0.0	0.0	0.0	0.0	0.0	0.0	0.0	0.0	0.0	0.0
ZNF438	220929	symbol	H. sapiens	220929	H. sapiens	ZNF438	zinc finger protein 438	GO:0006355 regulation of transcription, DNA-templated;GO:1903506 regulation of nucleic acid-templated transcription;GO:0006351 transcription, DNA-templated		Transcription factors/Zinc-coordinating DNA-binding domains	Cytosol;Nucleoplasm(Supported)				0.0	0.0	0.0	0.0	0.0	0.0	0.0	0.0	0.0	0.0	0.0	0.0	0.0	0.0	0.0	0.0	0.0	0.0	0.0	0.0
SF3A3	10946	symbol	H. sapiens	10946	H. sapiens	SF3A3	splicing factor 3a subunit 3	GO:0000389 mRNA 3'-splice site recognition;GO:0006376 mRNA splice site selection;GO:0000245 spliceosomal complex assembly			Nucleoplasm(Enhanced)			(M5898)HALLMARK DNA REPAIR	0.0	0.0	0.0	0.0	0.0	0.0	0.0	0.0	0.0	0.0	0.0	0.0	0.0	0.0	0.0	0.0	0.0	0.0	0.0	0.0
SNX1	6642	symbol	H. sapiens	6642	H. sapiens	SNX1	sorting nexin 1	GO:0034498 early endosome to Golgi transport;GO:0072673 lamellipodium morphogenesis;GO:0031623 receptor internalization			Endosomes(Enhanced)Lysosomes(Supported)		(M238)PID THROMBIN PAR1 PATHWAY; (M142)PID AJDISS 2PATHWAY		0.0	0.0	0.0	0.0	0.0	0.0	0.0	0.0	0.0	0.0	0.0	0.0	0.0	0.0	0.0	0.0	0.0	0.0	0.0	0.0
C2orf68	388969	symbol	H. sapiens	388969	H. sapiens	C2orf68	chromosome 2 open reading frame 68				Mitochondria;Nuclear membrane;Nucleoli;Nucleus(Approved)				0.0	0.0	0.0	0.0	0.0	0.0	0.0	0.0	0.0	0.0	0.0	0.0	0.0	0.0	0.0	0.0	0.0	0.0	0.0	0.0
USP22	23326	symbol	H. sapiens	23326	H. sapiens	USP22	ubiquitin specific peptidase 22	GO:0043967 histone H4 acetylation;GO:0016578 histone deubiquitination;GO:0016574 histone ubiquitination		Enzymes/{ENZYME proteins/Hydrolases,Peptidases/Cysteine-type peptidases}	Nuclear speckles(Supported)				0.0	0.0	1.0	0.0	0.0	0.0	0.0	1.0	0.0	0.0	0.0	0.0	0.0	0.0	0.0	0.0	0.0	0.0	0.0	0.0
WHSC1L1	54904	gene_synonym	H. sapiens	54904	H. sapiens	NSD3	nuclear receptor binding SET domain protein 3	GO:0034968 histone lysine methylation;GO:0016571 histone methylation;GO:0018022 peptidyl-lysine methylation		Enzymes/ENZYME proteins/Transferases	Nucleoplasm(Supported)Mitochondria(Approved)				0.0	0.0	0.0	0.0	0.0	0.0	0.0	1.0	0.0	0.0	0.0	0.0	0.0	0.0	0.0	0.0	0.0	0.0	0.0	0.0
MS4A6A	64231	symbol	H. sapiens	64231	H. sapiens	MS4A6A	membrane spanning 4-domains A6A								0.0	0.0	0.0	0.0	0.0	0.0	0.0	0.0	0.0	0.0	0.0	0.0	0.0	0.0	0.0	0.0	0.0	0.0	0.0	0.0
ZBP1	81030	symbol	H. sapiens	81030	H. sapiens	ZBP1	Z-DNA binding protein 1	GO:0032481 positive regulation of type I interferon production;GO:0032479 regulation of type I interferon production;GO:0032606 type I interferon production						(M5913)HALLMARK INTERFERON GAMMA RESPONSE	0.0	0.0	0.0	1.0	0.0	0.0	0.0	0.0	0.0	0.0	0.0	0.0	0.0	0.0	0.0	0.0	0.0	0.0	0.0	0.0
STIM1	6786	symbol	H. sapiens	6786	H. sapiens	STIM1	stromal interaction molecule 1	GO:0032237 activation of store-operated calcium channel activity;GO:1901341 positive regulation of store-operated calcium channel activity;GO:1901339 regulation of store-operated calcium channel activity		Transporters/Transporter channels and pores	Endoplasmic reticulum(Enhanced)		(M88)PID CD8 TCR PATHWAY; (M34)PID TCR PATHWAY		0.0	0.0	1.0	0.0	0.0	0.0	0.0	0.0	0.0	0.0	0.0	0.0	0.0	0.0	0.0	0.0	0.0	0.0	0.0	0.0
CPNE1	8904	symbol	H. sapiens	8904	H. sapiens	CPNE1	copine 1	GO:1903265 positive regulation of tumor necrosis factor-mediated signaling pathway;GO:1901223 negative regulation of NIK/NF-kappaB signaling;GO:0010803 regulation of tumor necrosis factor-mediated signaling pathway			Nucleoplasm(Supported)Nuclear membrane(Approved)				1.0	0.0	0.0	0.0	0.0	0.0	0.0	0.0	0.0	1.0	0.0	0.0	0.0	0.0	0.0	0.0	0.0	0.0	0.0	0.0
ARHGAP19	84986	symbol	H. sapiens	84986	H. sapiens	ARHGAP19	Rho GTPase activating protein 19	GO:0043547 positive regulation of GTPase activity;GO:0051056 regulation of small GTPase mediated signal transduction;GO:0043087 regulation of GTPase activity			Plasma membrane(Supported)				0.0	0.0	0.0	0.0	0.0	0.0	0.0	0.0	1.0	0.0	0.0	0.0	1.0	0.0	0.0	0.0	0.0	0.0	0.0	0.0
KCTD2	23510	symbol	H. sapiens	23510	H. sapiens	KCTD2	potassium channel tetramerization domain containing 2	GO:0043161 proteasome-mediated ubiquitin-dependent protein catabolic process;GO:0006511 ubiquitin-dependent protein catabolic process;GO:0051260 protein homooligomerization							0.0	0.0	0.0	0.0	0.0	0.0	0.0	0.0	0.0	0.0	0.0	0.0	0.0	0.0	0.0	0.0	0.0	1.0	0.0	0.0
PDCD6IP	10015	symbol	H. sapiens	10015	H. sapiens	PDCD6IP	programmed cell death 6 interacting protein	GO:1903553 positive regulation of extracellular exosome assembly;GO:0039702 viral budding via host ESCRT complex;GO:1903551 regulation of extracellular exosome assembly			Cytosol(Enhanced)				0.0	0.0	0.0	0.0	0.0	0.0	0.0	0.0	0.0	0.0	0.0	0.0	0.0	0.0	0.0	0.0	1.0	1.0	0.0	0.0
CCM2	83605	symbol	H. sapiens	83605	H. sapiens	CCM2	CCM2 scaffolding protein	GO:0048845 venous blood vessel morphogenesis;GO:0060837 blood vessel endothelial cell differentiation;GO:0061154 endothelial tube morphogenesis			Mitochondria(Enhanced)		(M20)PID P38 MKK3 6PATHWAY; (M76)PID P38 ALPHA BETA PATHWAY		0.0	0.0	0.0	0.0	0.0	0.0	0.0	0.0	0.0	0.0	0.0	0.0	0.0	0.0	0.0	0.0	0.0	0.0	0.0	0.0
FAM111A	63901	symbol	H. sapiens	63901	H. sapiens	FAM111A	family with sequence similarity 111 member A	GO:0045071 negative regulation of viral genome replication;GO:1903901 negative regulation of viral life cycle;GO:0045069 regulation of viral genome replication			Nucleoli fibrillar center;Nucleus(Approved)				0.0	0.0	0.0	0.0	0.0	0.0	0.0	0.0	0.0	0.0	0.0	0.0	0.0	0.0	0.0	0.0	1.0	0.0	0.0	0.0
SLPI	6590	symbol	H. sapiens	6590	H. sapiens	SLPI	secretory leukocyte peptidase inhibitor	GO:0045071 negative regulation of viral genome replication;GO:1903901 negative regulation of viral life cycle;GO:0045069 regulation of viral genome replication					(M3468)NABA ECM REGULATORS; (M5885)NABA MATRISOME ASSOCIATED; (M5889)NABA MATRISOME	(M5953)HALLMARK KRAS SIGNALING UP	1.0	0.0	0.0	0.0	0.0	0.0	0.0	0.0	1.0	0.0	0.0	0.0	0.0	0.0	0.0	0.0	1.0	0.0	0.0	0.0
CEACAM1	634	symbol	H. sapiens	634	H. sapiens	CEACAM1	carcinoembryonic antigen related cell adhesion molecule 1	GO:0043318 negative regulation of cytotoxic T cell degranulation;GO:0002859 negative regulation of natural killer cell mediated cytotoxicity directed against tumor cell target;GO:0043317 regulation of cytotoxic T cell degranulation		CD markers		Arcitumomab (Protein homodimerization activity)			1.0	1.0	0.0	1.0	1.0	0.0	1.0	0.0	0.0	1.0	0.0	0.0	0.0	0.0	1.0	1.0	0.0	0.0	0.0	1.0
AKAP10	11216	symbol	H. sapiens	11216	H. sapiens	AKAP10	A-kinase anchoring protein 10	GO:0007596 blood coagulation;GO:0007599 hemostasis;GO:0050817 coagulation			Cytosol(Supported)Plasma membrane(Approved)			(M5921)HALLMARK COMPLEMENT	0.0	0.0	0.0	0.0	0.0	0.0	0.0	0.0	0.0	0.0	0.0	0.0	0.0	0.0	0.0	0.0	0.0	0.0	0.0	0.0
LPCAT3	10162	symbol	H. sapiens	10162	H. sapiens	LPCAT3	lysophosphatidylcholine acyltransferase 3	GO:0036150 phosphatidylserine acyl-chain remodeling;GO:0036152 phosphatidylethanolamine acyl-chain remodeling;GO:0036151 phosphatidylcholine acyl-chain remodeling		Enzymes/ENZYME proteins/Transferases				(M5905)HALLMARK ADIPOGENESIS	0.0	0.0	0.0	0.0	0.0	0.0	0.0	0.0	0.0	0.0	0.0	0.0	0.0	0.0	0.0	0.0	0.0	0.0	0.0	0.0
SHISA4	149345	symbol	H. sapiens	149345	H. sapiens	SHISA4	shisa family member 4								0.0	0.0	0.0	0.0	0.0	0.0	0.0	0.0	0.0	0.0	0.0	0.0	0.0	0.0	0.0	0.0	0.0	0.0	0.0	0.0
ABHD13	84945	symbol	H. sapiens	84945	H. sapiens	ABHD13	abhydrolase domain containing 13	GO:0002084 protein depalmitoylation;GO:0098734 macromolecule depalmitoylation;GO:0042159 lipoprotein catabolic process			Cytosol(Approved)				0.0	0.0	0.0	0.0	0.0	0.0	0.0	0.0	0.0	0.0	0.0	0.0	0.0	0.0	0.0	0.0	0.0	0.0	0.0	0.0
LMAN2	10960	symbol	H. sapiens	10960	H. sapiens	LMAN2	lectin, mannose binding 2	GO:0050766 positive regulation of phagocytosis;GO:0050764 regulation of phagocytosis;GO:0006890 retrograde vesicle-mediated transport, Golgi to ER							0.0	0.0	0.0	0.0	0.0	0.0	0.0	0.0	0.0	0.0	0.0	0.0	0.0	0.0	0.0	0.0	0.0	0.0	0.0	0.0
CRKL	1399	symbol	H. sapiens	1399	H. sapiens	CRKL	CRK like proto-oncogene, adaptor protein	GO:0000186 activation of MAPKK activity;GO:1900026 positive regulation of substrate adhesion-dependent cell spreading;GO:0060017 parathyroid gland development			Nucleoplasm(Enhanced)Cytosol(Approved)		(M190)PID TCR JNK PATHWAY; (M206)PID PDGFRA PATHWAY; (M69)PID REELIN PATHWAY		0.0	1.0	0.0	0.0	0.0	0.0	0.0	0.0	0.0	1.0	0.0	0.0	0.0	0.0	0.0	0.0	0.0	0.0	0.0	0.0
CASP5	838	symbol	H. sapiens	838	H. sapiens	CASP5	caspase 5	GO:0021762 substantia nigra development;GO:0030901 midbrain development;GO:0071260 cellular response to mechanical stimulus		Enzymes/{ENZYME proteins/Hydrolases,Peptidases/Cysteine-type peptidases}				(M5921)HALLMARK COMPLEMENT	0.0	0.0	0.0	1.0	0.0	0.0	0.0	0.0	0.0	0.0	0.0	0.0	0.0	0.0	0.0	0.0	0.0	0.0	0.0	0.0
CCDC97	90324	symbol	H. sapiens	90324	H. sapiens	CCDC97	coiled-coil domain containing 97				Nucleoplasm(Supported)Cytosol;Plasma membrane(Approved)				0.0	0.0	0.0	0.0	0.0	0.0	0.0	0.0	0.0	0.0	0.0	0.0	0.0	0.0	0.0	0.0	0.0	0.0	0.0	0.0
FOXO1	2308	symbol	H. sapiens	2308	H. sapiens	FOXO1	forkhead box O1	GO:1903243 negative regulation of cardiac muscle hypertrophy in response to stress;GO:0010616 negative regulation of cardiac muscle adaptation;GO:0035947 regulation of gluconeogenesis by regulation of transcription from RNA polymerase II promoter		Transcription factors/Helix-turn-helix domains	Cytosol;Nucleoplasm(Supported)		(M32)PID HDAC CLASSIII PATHWAY; (M249)PID PI3KCI AKT PATHWAY; (M14532)ST PHOSPHOINOSITIDE 3 KINASE PATHWAY	(M5957)HALLMARK PANCREAS BETA CELLS	0.0	0.0	0.0	0.0	0.0	0.0	0.0	1.0	1.0	1.0	0.0	1.0	0.0	0.0	0.0	0.0	0.0	0.0	0.0	0.0
C19orf35	374872	gene_synonym	H. sapiens	374872	H. sapiens	PEAK3	PEAK family member 3	GO:0006468 protein phosphorylation;GO:0016310 phosphorylation;GO:0006796 phosphate-containing compound metabolic process							0.0	0.0	0.0	0.0	0.0	0.0	0.0	0.0	0.0	0.0	0.0	0.0	0.0	0.0	0.0	0.0	0.0	0.0	0.0	0.0
HAUS4	54930	symbol	H. sapiens	54930	H. sapiens	HAUS4	HAUS augmin like complex subunit 4	GO:0097711 ciliary basal body-plasma membrane docking;GO:0010389 regulation of G2/M transition of mitotic cell cycle;GO:0007098 centrosome cycle			Focal adhesion sites;Plasma membrane(Supported)				0.0	0.0	0.0	0.0	0.0	0.0	0.0	0.0	0.0	0.0	0.0	0.0	1.0	0.0	0.0	0.0	0.0	0.0	0.0	0.0
ASXL2	55252	symbol	H. sapiens	55252	H. sapiens	ASXL2	additional sex combs like 2, transcriptional regulator	GO:0035360 positive regulation of peroxisome proliferator activated receptor signaling pathway;GO:0035358 regulation of peroxisome proliferator activated receptor signaling pathway;GO:0035357 peroxisome proliferator activated receptor signaling pathway			Nucleoplasm(Enhanced)				0.0	0.0	0.0	0.0	0.0	0.0	0.0	0.0	0.0	0.0	0.0	0.0	0.0	0.0	0.0	0.0	0.0	0.0	0.0	0.0
TRIM27	5987	symbol	H. sapiens	5987	H. sapiens	TRIM27	tripartite motif containing 27	GO:1902187 negative regulation of viral release from host cell;GO:1900041 negative regulation of interleukin-2 secretion;GO:0051127 positive regulation of actin nucleation		Enzymes/ENZYME proteins/Transferases	Nucleoli;Nucleus(Approved)				0.0	0.0	1.0	1.0	1.0	0.0	0.0	0.0	0.0	0.0	0.0	0.0	0.0	1.0	0.0	0.0	1.0	1.0	0.0	1.0
RNF4	6047	symbol	H. sapiens	6047	H. sapiens	RNF4	ring finger protein 4	GO:0090234 regulation of kinetochore assembly;GO:0090230 regulation of centromere complex assembly;GO:0085020 protein K6-linked ubiquitination		Enzymes/ENZYME proteins/Transferases				(M5921)HALLMARK COMPLEMENT	0.0	0.0	1.0	0.0	0.0	0.0	0.0	0.0	0.0	0.0	0.0	0.0	0.0	0.0	0.0	0.0	0.0	0.0	0.0	0.0
AGAP4	119016	symbol	H. sapiens	119016	H. sapiens	AGAP4	ArfGAP with GTPase domain, ankyrin repeat and PH domain 4	GO:0043547 positive regulation of GTPase activity;GO:0043087 regulation of GTPase activity;GO:0051345 positive regulation of hydrolase activity							0.0	0.0	0.0	0.0	0.0	0.0	0.0	0.0	1.0	0.0	0.0	0.0	0.0	0.0	0.0	0.0	0.0	0.0	0.0	0.0
MEF2C	4208	symbol	H. sapiens	4208	H. sapiens	MEF2C	myocyte enhancer factor 2C	GO:0003138 primary heart field specification;GO:0003185 sinoatrial valve morphogenesis;GO:2000111 positive regulation of macrophage apoptotic process		Transcription factors	Vesicles(Supported)Nucleoplasm(Approved)		(M30)PID HDAC CLASSII PATHWAY; (M270)PID MAPK TRK PATHWAY; (M229)PID P38 ALPHA BETA DOWNSTREAM PATHWAY	(M5909)HALLMARK MYOGENESIS	0.0	1.0	0.0	1.0	0.0	0.0	1.0	0.0	1.0	1.0	0.0	1.0	0.0	0.0	1.0	0.0	0.0	0.0	0.0	1.0
ATF7	11016	symbol	H. sapiens	11016	H. sapiens	ATF7	activating transcription factor 7	GO:0016032 viral process;GO:0044403 symbiont process;GO:0044419 interspecies interaction between organisms		Transcription factors/Basic domains	Cytosol;Nucleus(Approved)		(M279)PID RB 1PATHWAY		0.0	0.0	0.0	0.0	0.0	0.0	0.0	0.0	0.0	0.0	0.0	0.0	0.0	0.0	0.0	0.0	1.0	0.0	0.0	0.0
SYNE1	23345	symbol	H. sapiens	23345	H. sapiens	SYNE1	spectrin repeat containing nuclear envelope protein 1	GO:0090292 nuclear matrix anchoring at nuclear membrane;GO:0043578 nuclear matrix organization;GO:0090286 cytoskeletal anchoring at nuclear membrane			Nuclear membrane;Nucleoplasm(Supported)			(M5942)HALLMARK UV RESPONSE DN	0.0	0.0	0.0	0.0	0.0	0.0	0.0	0.0	0.0	0.0	0.0	0.0	1.0	0.0	0.0	0.0	0.0	0.0	0.0	0.0
PARP10	84875	symbol	H. sapiens	84875	H. sapiens	PARP10	poly(ADP-ribose) polymerase family member 10	GO:0033159 negative regulation of protein import into nucleus, translocation;GO:1900045 negative regulation of protein K63-linked ubiquitination;GO:0034356 NAD biosynthesis via nicotinamide riboside salvage pathway		Enzymes/ENZYME proteins/Transferases	Cytosol;Nucleoli(Supported)				0.0	0.0	1.0	0.0	0.0	0.0	0.0	1.0	0.0	0.0	0.0	0.0	0.0	0.0	0.0	0.0	1.0	0.0	0.0	0.0
CRLF3	51379	symbol	H. sapiens	51379	H. sapiens	CRLF3	cytokine receptor like factor 3	GO:0071158 positive regulation of cell cycle arrest;GO:0046427 positive regulation of JAK-STAT cascade;GO:0071156 regulation of cell cycle arrest			Cytosol;Plasma membrane(Supported)		(M5883)NABA SECRETED FACTORS; (M5885)NABA MATRISOME ASSOCIATED; (M5889)NABA MATRISOME		0.0	0.0	0.0	0.0	0.0	0.0	0.0	0.0	0.0	0.0	0.0	0.0	0.0	0.0	0.0	0.0	0.0	0.0	0.0	0.0
TLR10	81793	symbol	H. sapiens	81793	H. sapiens	TLR10	toll like receptor 10	GO:0034166 toll-like receptor 10 signaling pathway;GO:0002755 MyD88-dependent toll-like receptor signaling pathway;GO:0002224 toll-like receptor signaling pathway		CD markers					0.0	0.0	0.0	1.0	0.0	0.0	1.0	0.0	0.0	0.0	0.0	0.0	0.0	0.0	0.0	0.0	0.0	0.0	0.0	0.0
TWF1	5756	symbol	H. sapiens	5756	H. sapiens	TWF1	twinfilin actin binding protein 1	GO:0043538 regulation of actin phosphorylation;GO:0051016 barbed-end actin filament capping;GO:0031289 actin phosphorylation			Cytosol(Enhanced)				0.0	0.0	0.0	0.0	0.0	0.0	0.0	0.0	0.0	0.0	0.0	0.0	0.0	0.0	0.0	0.0	0.0	0.0	0.0	0.0
SART1	9092	symbol	H. sapiens	9092	H. sapiens	SART1	SART1, U4/U6.U5 tri-snRNP-associated protein 1	GO:0045585 positive regulation of cytotoxic T cell differentiation;GO:0045583 regulation of cytotoxic T cell differentiation;GO:0045065 cytotoxic T cell differentiation			Nuclear speckles(Enhanced)Golgi apparatus(Supported)				0.0	1.0	0.0	0.0	0.0	0.0	0.0	0.0	0.0	0.0	0.0	0.0	0.0	0.0	0.0	0.0	0.0	0.0	0.0	0.0
COLGALT1	79709	symbol	H. sapiens	79709	H. sapiens	COLGALT1	collagen beta(1-O)galactosyltransferase 1	GO:1904028 positive regulation of collagen fibril organization;GO:1904026 regulation of collagen fibril organization;GO:1903055 positive regulation of extracellular matrix organization		Enzymes/ENZYME proteins/Transferases	Vesicles(Approved)			(M5930)HALLMARK EPITHELIAL MESENCHYMAL TRANSITION	0.0	0.0	0.0	0.0	0.0	0.0	0.0	0.0	0.0	0.0	0.0	0.0	0.0	0.0	0.0	0.0	0.0	0.0	0.0	0.0
UBASH3B	84959	symbol	H. sapiens	84959	H. sapiens	UBASH3B	ubiquitin associated and SH3 domain containing B	GO:0051279 regulation of release of sequestered calcium ion into cytosol;GO:0090331 negative regulation of platelet aggregation;GO:0051209 release of sequestered calcium ion into cytosol		Enzymes/ENZYME proteins/Hydrolases	Plasma membrane(Approved)				0.0	1.0	0.0	1.0	1.0	0.0	0.0	0.0	0.0	0.0	0.0	0.0	0.0	0.0	1.0	0.0	0.0	0.0	0.0	0.0
AP1G2	8906	symbol	H. sapiens	8906	H. sapiens	AP1G2	adaptor related protein complex 1 gamma 2 subunit	GO:0016032 viral process;GO:0044403 symbiont process;GO:0044419 interspecies interaction between organisms							0.0	0.0	0.0	0.0	0.0	0.0	0.0	0.0	0.0	0.0	0.0	0.0	0.0	0.0	0.0	0.0	1.0	0.0	0.0	0.0
DPYD	1806	symbol	H. sapiens	1806	H. sapiens	DPYD	dihydropyrimidine dehydrogenase	GO:0006214 thymidine catabolic process;GO:0046127 pyrimidine deoxyribonucleoside catabolic process;GO:0006210 thymine catabolic process		Enzymes/ENZYME proteins/Oxidoreductases		(5s)-5-Iododihydro-2,4(1h,3h)-Pyrimidinedione (Protein homodimerization activity);Nadph Dihydro-Nicotinamide-Adenine-Dinucleotidephosphate (Protein homodimerization activity);6-Carboxymethyluracil (Protein homodimerization activity);Flavin adenine dinucleotide (Protein homodimerization activity);Riboflavin Monophosphate (Protein homodimerization activity);Uracil (Protein homodimerization activity…		(M5902)HALLMARK APOPTOSIS	0.0	0.0	0.0	0.0	0.0	0.0	0.0	0.0	0.0	0.0	0.0	0.0	0.0	0.0	0.0	0.0	0.0	0.0	0.0	0.0
HVCN1	84329	symbol	H. sapiens	84329	H. sapiens	HVCN1	hydrogen voltage gated channel 1	GO:0071294 cellular response to zinc ion;GO:0035036 sperm-egg recognition;GO:0043312 neutrophil degranulation		Transporters/Transporter channels and pores					1.0	0.0	0.0	0.0	0.0	0.0	0.0	0.0	0.0	0.0	0.0	0.0	0.0	0.0	0.0	0.0	0.0	0.0	0.0	0.0
CMTM3	123920	symbol	H. sapiens	123920	H. sapiens	CMTM3	CKLF like MARVEL transmembrane domain containing 3	GO:0050861 positive regulation of B cell receptor signaling pathway;GO:0050855 regulation of B cell receptor signaling pathway;GO:0050857 positive regulation of antigen receptor-mediated signaling pathway			Nucleoplasm(Approved)				0.0	0.0	0.0	0.0	0.0	0.0	1.0	0.0	0.0	0.0	0.0	0.0	0.0	0.0	0.0	0.0	0.0	0.0	0.0	0.0
C5AR2	27202	symbol	H. sapiens	27202	H. sapiens	C5AR2	complement component 5a receptor 2	GO:0090024 negative regulation of neutrophil chemotaxis;GO:0038178 complement component C5a signaling pathway;GO:0071623 negative regulation of granulocyte chemotaxis		G-protein coupled receptors/{Chemokines and chemotactic factors receptors,GPCRs excl olfactory receptors}					0.0	0.0	0.0	1.0	1.0	0.0	1.0	0.0	0.0	0.0	0.0	0.0	0.0	0.0	0.0	0.0	0.0	0.0	0.0	1.0
SSH3	54961	symbol	H. sapiens	54961	H. sapiens	SSH3	slingshot protein phosphatase 3	GO:0010591 regulation of lamellipodium assembly;GO:0050770 regulation of axonogenesis;GO:1902743 regulation of lamellipodium organization		Enzymes/ENZYME proteins/Hydrolases	Actin filaments;Cytosol;Nuclear speckles;Plasma membrane(Approved)				0.0	0.0	0.0	0.0	0.0	0.0	0.0	0.0	0.0	0.0	0.0	0.0	0.0	0.0	0.0	0.0	0.0	0.0	0.0	0.0
CDIPT	10423	symbol	H. sapiens	10423	H. sapiens	CDIPT	CDP-diacylglycerol--inositol 3-phosphatidyltransferase	GO:0046341 CDP-diacylglycerol metabolic process;GO:0006661 phosphatidylinositol biosynthetic process;GO:0046474 glycerophospholipid biosynthetic process		Enzymes/ENZYME proteins/Transferases	Nuclear membrane;Nucleoplasm;Plasma membrane(Approved)	Myo-Inositol (Manganese ion binding)			0.0	0.0	0.0	0.0	0.0	0.0	0.0	0.0	0.0	0.0	0.0	0.0	0.0	0.0	0.0	0.0	0.0	0.0	0.0	0.0
ITGA4	3676	symbol	H. sapiens	3676	H. sapiens	ITGA4	integrin subunit alpha 4	GO:1903238 positive regulation of leukocyte tethering or rolling;GO:1990771 clathrin-dependent extracellular exosome endocytosis;GO:1903236 regulation of leukocyte tethering or rolling		CD markers	Plasma membrane(Approved)	Natalizumab (Metal ion binding);ATL1102 (Metal ion binding);CDP323 (Metal ion binding);R1295 (Metal ion binding);R411 (Metal ion binding);MLN-02 (Metal ion binding);Tinzaparin (Metal ion binding);Vedolizumab (Metal ion binding)	(M212)PID INTEGRIN5 PATHWAY; (M274)PID LYMPH ANGIOGENESIS PATHWAY; (M47)PID INTEGRIN CS PATHWAY	(M5897)HALLMARK IL6 JAK STAT3 SIGNALING	0.0	1.0	1.0	0.0	0.0	1.0	0.0	0.0	0.0	0.0	0.0	0.0	0.0	0.0	0.0	0.0	0.0	0.0	1.0	0.0
PSMB10	5699	symbol	H. sapiens	5699	H. sapiens	PSMB10	proteasome subunit beta 10	GO:0002223 stimulatory C-type lectin receptor signaling pathway;GO:0002479 antigen processing and presentation of exogenous peptide antigen via MHC class I, TAP-dependent;GO:0002220 innate immune response activating cell surface receptor signaling pathway		Enzymes/{ENZYME proteins/Hydrolases,Peptidases/Threonine-type peptidases}	Cytosol(Enhanced)	Carfilzomib (Threonine-type endopeptidase activity)		(M5934)HALLMARK XENOBIOTIC METABOLISM; (M5913)HALLMARK INTERFERON GAMMA RESPONSE; (M5950)HALLMARK ALLOGRAFT REJECTION	0.0	1.0	1.0	1.0	0.0	0.0	1.0	0.0	0.0	1.0	1.0	0.0	1.0	0.0	0.0	0.0	1.0	0.0	0.0	0.0
IL32	9235	symbol	H. sapiens	9235	H. sapiens	IL32	interleukin 32	GO:0019221 cytokine-mediated signaling pathway;GO:0010469 regulation of signaling receptor activity;GO:0071345 cellular response to cytokine stimulus						(M5930)HALLMARK EPITHELIAL MESENCHYMAL TRANSITION	0.0	0.0	0.0	0.0	0.0	0.0	0.0	0.0	0.0	1.0	0.0	0.0	0.0	0.0	0.0	0.0	0.0	0.0	0.0	0.0
DDX60	55601	symbol	H. sapiens	55601	H. sapiens	DDX60	DExD/H-box helicase 60	GO:1900245 positive regulation of MDA-5 signaling pathway;GO:1900246 positive regulation of RIG-I signaling pathway;GO:0039533 regulation of MDA-5 signaling pathway		Enzymes/ENZYME proteins/Hydrolases	Cytosol(Supported)Intermediate filaments(Approved)			(M5911)HALLMARK INTERFERON ALPHA RESPONSE; (M5913)HALLMARK INTERFERON GAMMA RESPONSE	0.0	0.0	0.0	1.0	0.0	0.0	1.0	0.0	0.0	0.0	0.0	0.0	0.0	0.0	0.0	0.0	0.0	0.0	0.0	1.0
GPAT3	84803	symbol	H. sapiens	84803	H. sapiens	GPAT3	glycerol-3-phosphate acyltransferase 3	GO:0016024 CDP-diacylglycerol biosynthetic process;GO:0006654 phosphatidic acid biosynthetic process;GO:0019432 triglyceride biosynthetic process		Enzymes/ENZYME proteins/Transferases	Cytosol;Plasma membrane(Uncertain)				0.0	0.0	0.0	0.0	0.0	0.0	0.0	0.0	0.0	0.0	0.0	0.0	0.0	0.0	0.0	0.0	0.0	0.0	0.0	0.0
BET1L	51272	symbol	H. sapiens	51272	H. sapiens	BET1L	Bet1 golgi vesicular membrane trafficking protein like	GO:2000156 regulation of retrograde vesicle-mediated transport, Golgi to ER;GO:0006890 retrograde vesicle-mediated transport, Golgi to ER;GO:0042147 retrograde transport, endosome to Golgi			Golgi apparatus;Nucleus(Approved)				0.0	0.0	0.0	0.0	0.0	0.0	0.0	0.0	0.0	0.0	0.0	0.0	0.0	0.0	0.0	0.0	0.0	0.0	0.0	0.0
DDAH2	23564	symbol	H. sapiens	23564	H. sapiens	DDAH2	dimethylarginine dimethylaminohydrolase 2	GO:0006527 arginine catabolic process;GO:0000052 citrulline metabolic process;GO:0045429 positive regulation of nitric oxide biosynthetic process		Enzymes/ENZYME proteins/Hydrolases	Cytosol;Microtubule organizing center(Uncertain)	L-Citrulline (Dimethylargininase activity)		(M5934)HALLMARK XENOBIOTIC METABOLISM	0.0	0.0	0.0	0.0	0.0	0.0	0.0	0.0	0.0	0.0	0.0	0.0	0.0	0.0	0.0	0.0	0.0	0.0	0.0	0.0
GBA	2629	symbol	H. sapiens	2629	H. sapiens	GBA	glucosylceramidase beta	GO:0006680 glucosylceramide catabolic process;GO:1901805 beta-glucoside catabolic process;GO:1904457 positive regulation of neuronal action potential		Enzymes/ENZYME proteins/Hydrolases		Myo-Inositol (Receptor binding);N-acetyl-alpha-D-glucosamine (Receptor binding);Velaglucerase alfa (Receptor binding);(2R,3R,4R,5S)-2-(HYDROXYMETHYL)-1-NONYLPIPERIDINE-3,4,5-TRIOL (Receptor binding)			0.0	0.0	0.0	1.0	0.0	0.0	0.0	0.0	1.0	0.0	0.0	0.0	0.0	0.0	0.0	0.0	0.0	1.0	0.0	0.0
UBE2L3	7332	symbol	H. sapiens	7332	H. sapiens	UBE2L3	ubiquitin conjugating enzyme E2 L3	GO:1903955 positive regulation of protein targeting to mitochondrion;GO:0051443 positive regulation of ubiquitin-protein transferase activity;GO:0070979 protein K11-linked ubiquitination		Enzymes/ENZYME proteins/Transferases	Cytosol;Nucleus(Approved)		(M258)PID BARD1 PATHWAY; (M275)PID ALPHA SYNUCLEIN PATHWAY	(M5926)HALLMARK MYC TARGETS V1	0.0	0.0	1.0	0.0	0.0	0.0	0.0	0.0	0.0	0.0	0.0	0.0	0.0	0.0	0.0	0.0	0.0	0.0	0.0	0.0
LIMK1	3984	symbol	H. sapiens	3984	H. sapiens	LIMK1	LIM domain kinase 1	GO:0051496 positive regulation of stress fiber assembly;GO:0045773 positive regulation of axon extension;GO:0051444 negative regulation of ubiquitin-protein transferase activity	TKL Ser/Thr protein kinase family	Enzymes/{ENZYME proteins/Transferases,Kinases/TKL Ser/Thr protein kinases}	Cytosol;Nuclear speckles(Supported)	Dabrafenib (Zinc ion binding)	(M16801)SIG REGULATION OF THE ACTIN CYTOSKELETON BY RHO GTPASES; (M5193)SIG CHEMOTAXIS; (M12)PID RHOA PATHWAY		0.0	0.0	1.0	0.0	0.0	0.0	1.0	0.0	0.0	0.0	0.0	0.0	1.0	0.0	0.0	0.0	0.0	0.0	0.0	0.0
MAP1S	55201	symbol	H. sapiens	55201	H. sapiens	MAP1S	microtubule associated protein 1S	GO:0010848 regulation of chromatin disassembly;GO:0047497 mitochondrion transport along microtubule;GO:0034643 establishment of mitochondrion localization, microtubule-mediated			Cytosol(Enhanced)			(M5893)HALLMARK MITOTIC SPINDLE	0.0	0.0	0.0	0.0	0.0	0.0	0.0	1.0	0.0	0.0	0.0	0.0	0.0	0.0	0.0	0.0	0.0	0.0	0.0	0.0
EFCAB14	9813	symbol	H. sapiens	9813	H. sapiens	EFCAB14	EF-hand calcium binding domain 14				Cytosol;Golgi apparatus;Nucleoli(Approved)				0.0	0.0	0.0	0.0	0.0	0.0	0.0	0.0	0.0	0.0	0.0	0.0	0.0	0.0	0.0	0.0	0.0	0.0	0.0	0.0
ZNF107	51427	symbol	H. sapiens	51427	H. sapiens	ZNF107	zinc finger protein 107	GO:0006355 regulation of transcription, DNA-templated;GO:1903506 regulation of nucleic acid-templated transcription;GO:0006351 transcription, DNA-templated		Transcription factors/Zinc-coordinating DNA-binding domains					0.0	0.0	0.0	0.0	0.0	0.0	0.0	0.0	0.0	0.0	0.0	0.0	0.0	0.0	0.0	0.0	0.0	0.0	0.0	0.0
SEPHS2	22928	symbol	H. sapiens	22928	H. sapiens	SEPHS2	selenophosphate synthetase 2	GO:0016260 selenocysteine biosynthetic process;GO:0016259 selenocysteine metabolic process;GO:0009070 serine family amino acid biosynthetic process		Enzymes/ENZYME proteins/Transferases	Nucleoplasm(Approved)				0.0	0.0	0.0	0.0	0.0	0.0	0.0	0.0	0.0	0.0	0.0	0.0	0.0	0.0	0.0	0.0	0.0	0.0	0.0	0.0
SORT1	6272	symbol	H. sapiens	6272	H. sapiens	SORT1	sortilin 1	GO:0051005 negative regulation of lipoprotein lipase activity;GO:0038180 nerve growth factor signaling pathway;GO:0060192 negative regulation of lipase activity			Cytosol;Golgi apparatus;Plasma membrane(Approved)		(M153)PID P75 NTR PATHWAY		0.0	0.0	0.0	0.0	0.0	0.0	0.0	0.0	1.0	0.0	0.0	0.0	0.0	0.0	0.0	0.0	0.0	0.0	0.0	0.0
BTNL3	10917	symbol	H. sapiens	10917	H. sapiens	BTNL3	butyrophilin like 3	GO:0008150 biological_process							0.0	0.0	0.0	0.0	0.0	0.0	0.0	0.0	0.0	0.0	0.0	0.0	0.0	0.0	0.0	0.0	0.0	0.0	0.0	0.0
HMGN4	10473	symbol	H. sapiens	10473	H. sapiens	HMGN4	high mobility group nucleosomal binding domain 4				Nucleus(Uncertain)				0.0	0.0	0.0	0.0	0.0	0.0	0.0	0.0	0.0	0.0	0.0	0.0	0.0	0.0	0.0	0.0	0.0	0.0	0.0	0.0
PPP1CC	5501	symbol	H. sapiens	5501	H. sapiens	PPP1CC	protein phosphatase 1 catalytic subunit gamma	GO:0043153 entrainment of circadian clock by photoperiod;GO:0009649 entrainment of circadian clock;GO:0005977 glycogen metabolic process		Enzymes/ENZYME proteins/Hydrolases		9,10-Deepithio-9,10-Didehydroacanthifolicin (Protein serine/threonine phosphatase activity);Calyculin A (Protein serine/threonine phosphatase activity);(2S,5R,8S,11R,12S,15S,18S,19S,E)-8-ISOBUTYL-18-((5S,6S)-6-METHOXY-3,5-DIMETHYL-7-PHENYLHEPTYL)-1,2,5,12,15,19-HEXAMETHYL-3,6,9,13,16,20,25-HEPTAOXO-1,4,7,10,14,17,21-HEPTAAZACYCLOPENTACOS-21-ENE-11,22-DICARBOXYLIC ACID (Protein serine/threonine ph…	(M247)PID INSULIN GLUCOSE PATHWAY; (M14)PID AURORA B PATHWAY		0.0	0.0	0.0	0.0	0.0	0.0	0.0	0.0	0.0	0.0	0.0	0.0	1.0	0.0	0.0	0.0	0.0	0.0	0.0	0.0
SLBP	7884	symbol	H. sapiens	7884	H. sapiens	SLBP	stem-loop binding protein	GO:0006398 mRNA 3'-end processing by stem-loop binding and cleavage;GO:0006406 mRNA export from nucleus;GO:0071427 mRNA-containing ribonucleoprotein complex export from nucleus			Cytosol;Nucleoli;Nucleus(Supported)			(M5925)HALLMARK E2F TARGETS	0.0	0.0	0.0	0.0	0.0	0.0	0.0	0.0	0.0	0.0	0.0	0.0	0.0	0.0	0.0	0.0	0.0	0.0	0.0	0.0
CASP2	835	symbol	H. sapiens	835	H. sapiens	CASP2	caspase 2	GO:0006977 DNA damage response, signal transduction by p53 class mediator resulting in cell cycle arrest;GO:0072431 signal transduction involved in mitotic G1 DNA damage checkpoint;GO:0001554 luteolysis		Enzymes/{ENZYME proteins/Hydrolases,Peptidases/Cysteine-type peptidases}	Nucleoplasm(Approved)		(M197)PID HIV NEF PATHWAY; (M220)PID CASPASE PATHWAY; (M19)PID P73PATHWAY	(M5902)HALLMARK APOPTOSIS	0.0	0.0	0.0	0.0	0.0	0.0	0.0	0.0	1.0	0.0	0.0	0.0	0.0	0.0	0.0	0.0	0.0	0.0	0.0	0.0
C1orf162	128346	symbol	H. sapiens	128346	H. sapiens	C1orf162	chromosome 1 open reading frame 162								0.0	0.0	0.0	0.0	0.0	0.0	0.0	0.0	0.0	0.0	0.0	0.0	0.0	0.0	0.0	0.0	0.0	0.0	0.0	0.0
RXRB	6257	symbol	H. sapiens	6257	H. sapiens	RXRB	retinoid X receptor beta	GO:0048384 retinoic acid receptor signaling pathway;GO:0006367 transcription initiation from RNA polymerase II promoter;GO:0043401 steroid hormone mediated signaling pathway		Nuclear receptors;Transcription factors/Zinc-coordinating DNA-binding domains	Nucleus(Supported)	Adapalene (Zinc ion binding);Bexarotene (Zinc ion binding);Acitretin (Zinc ion binding);Alitretinoin (Zinc ion binding);Tretinoin (Zinc ion binding);Tazarotene (Zinc ion binding);Etretinate (Zinc ion binding);6-[1-(3,5,5,8,8-Pentamethyl-5,6,7,8-Tetrahydronaphthalen-2-Yl)Cyclopropyl]Pyridine-3-Carboxylic Acid (Zinc ion binding);N-(2,2,2-TRIFLUOROETHYL)-N-{4-[2,2,2-TRIFLUORO-1-HYDROXY-1-(TRIFLUOROM…	(M162)PID RXR VDR PATHWAY; (M207)PID RETINOIC ACID PATHWAY; (M239)PID A6B1 A6B4 INTEGRIN PATHWAY	(M5941)HALLMARK UV RESPONSE UP	0.0	0.0	0.0	0.0	0.0	0.0	0.0	0.0	0.0	0.0	1.0	1.0	0.0	0.0	0.0	0.0	0.0	0.0	0.0	0.0
TMEM55A	55529	gene_synonym	H. sapiens	55529	H. sapiens	PIP4P2	phosphatidylinositol-4,5-bisphosphate 4-phosphatase 2	GO:0046856 phosphatidylinositol dephosphorylation;GO:0046839 phospholipid dephosphorylation;GO:0046488 phosphatidylinositol metabolic process		Enzymes/ENZYME proteins/Hydrolases					0.0	0.0	0.0	0.0	0.0	0.0	0.0	0.0	0.0	0.0	0.0	0.0	0.0	0.0	0.0	0.0	0.0	0.0	0.0	0.0
VAPB	9217	symbol	H. sapiens	9217	H. sapiens	VAPB	VAMP associated protein B and C	GO:0006987 activation of signaling protein activity involved in unfolded protein response;GO:0045070 positive regulation of viral genome replication;GO:0019048 modulation by virus of host morphology or physiology		Transporters	Endoplasmic reticulum(Enhanced)				0.0	0.0	0.0	0.0	0.0	0.0	0.0	0.0	1.0	0.0	0.0	0.0	0.0	0.0	0.0	0.0	1.0	0.0	0.0	0.0
CX3CR1	1524	symbol	H. sapiens	1524	H. sapiens	CX3CR1	C-X3-C motif chemokine receptor 1	GO:1900272 negative regulation of long-term synaptic potentiation;GO:0002282 microglial cell activation involved in immune response;GO:1900271 regulation of long-term synaptic potentiation		G-protein coupled receptors/{Chemokines and chemotactic factors receptors,GPCRs excl olfactory receptors}	Nucleus(Approved)				1.0	0.0	0.0	0.0	0.0	0.0	0.0	0.0	0.0	1.0	0.0	0.0	0.0	0.0	0.0	0.0	1.0	0.0	0.0	0.0
PRKAA1	5562	symbol	H. sapiens	5562	H. sapiens	PRKAA1	protein kinase AMP-activated catalytic subunit alpha 1	GO:0046318 negative regulation of glucosylceramide biosynthetic process;GO:0046317 regulation of glucosylceramide biosynthetic process;GO:2001274 negative regulation of glucose import in response to insulin stimulus	CAMK Ser/Thr protein kinase family	Enzymes/{ENZYME proteins/Transferases,Kinases/CAMK Ser/Thr protein kinases}	Nuclear speckles(Supported)	Adenosine monophosphate (Tau-protein kinase activity);Adenosine triphosphate (Tau-protein kinase activity);Phenformin (Tau-protein kinase activity);Acetylsalicylic acid (Tau-protein kinase activity)	(M87)PID LKB1 PATHWAY; (M237)PID VEGFR1 2 PATHWAY		0.0	0.0	0.0	0.0	0.0	0.0	0.0	1.0	0.0	0.0	0.0	0.0	1.0	0.0	0.0	0.0	0.0	1.0	0.0	0.0
GSDMD	79792	symbol	H. sapiens	79792	H. sapiens	GSDMD	gasdermin D	GO:0050718 positive regulation of interleukin-1 beta secretion;GO:0035915 pore formation in membrane of other organism;GO:0050716 positive regulation of interleukin-1 secretion		Transporters/Transporter channels and pores	Nucleoplasm(Supported)				1.0	0.0	0.0	1.0	0.0	0.0	0.0	0.0	0.0	0.0	0.0	0.0	0.0	0.0	0.0	0.0	0.0	1.0	0.0	0.0
PCMTD1	115294	symbol	H. sapiens	115294	H. sapiens	PCMTD1	protein-L-isoaspartate (D-aspartate) O-methyltransferase domain containing 1	GO:0006479 protein methylation;GO:0008213 protein alkylation;GO:0043414 macromolecule methylation			Nucleoplasm;Plasma membrane(Approved)				0.0	0.0	0.0	0.0	0.0	0.0	0.0	0.0	0.0	0.0	0.0	0.0	0.0	0.0	0.0	0.0	0.0	0.0	0.0	0.0
CECR6	27439	gene_synonym	H. sapiens	27439	H. sapiens	TMEM121B	transmembrane protein 121B				Nucleoplasm;Plasma membrane;Vesicles(Approved)				0.0	0.0	0.0	0.0	0.0	0.0	0.0	0.0	0.0	0.0	0.0	0.0	0.0	0.0	0.0	0.0	0.0	0.0	0.0	0.0
Mar-05						None	None	None	None	None	None	None	None	None	nan	nan	nan	nan	nan	nan	nan	nan	nan	nan	nan	nan	nan	nan	nan	nan	nan	nan	nan	nan
YWHAH	7533	symbol	H. sapiens	7533	H. sapiens	YWHAH	tyrosine 3-monooxygenase/tryptophan 5-monooxygenase activation protein eta	GO:1900740 positive regulation of protein insertion into mitochondrial membrane involved in apoptotic signaling pathway;GO:1900739 regulation of protein insertion into mitochondrial membrane involved in apoptotic signaling pathway;GO:1901030 positive regulation of mitochondrial outer membrane permeabilization involved in apoptotic signaling pathway					(M199)PID P38 MK2 PATHWAY; (M247)PID INSULIN GLUCOSE PATHWAY; (M249)PID PI3KCI AKT PATHWAY	(M5949)HALLMARK PEROXISOME; (M5935)HALLMARK FATTY ACID METABOLISM; (M5915)HALLMARK APICAL JUNCTION	0.0	0.0	0.0	0.0	0.0	0.0	0.0	0.0	1.0	0.0	0.0	0.0	1.0	0.0	0.0	0.0	0.0	0.0	0.0	0.0
LAMTOR1	55004	symbol	H. sapiens	55004	H. sapiens	LAMTOR1	late endosomal/lysosomal adaptor, MAPK and MTOR activator 1	GO:0060620 regulation of cholesterol import;GO:0010872 regulation of cholesterol esterification;GO:2000909 regulation of sterol import			Golgi apparatus;Plasma membrane;Vesicles(Supported)				1.0	0.0	0.0	0.0	0.0	0.0	0.0	0.0	0.0	0.0	0.0	0.0	1.0	0.0	0.0	0.0	0.0	0.0	0.0	0.0
IL7R	3575	symbol	H. sapiens	3575	H. sapiens	IL7R	interleukin 7 receptor	GO:0001915 negative regulation of T cell mediated cytotoxicity;GO:0033089 positive regulation of T cell differentiation in thymus;GO:0033081 regulation of T cell differentiation in thymus		CD markers	Plasma membrane(Supported)Microtubule organizing center(Uncertain)			(M5953)HALLMARK KRAS SIGNALING UP; (M5932)HALLMARK INFLAMMATORY RESPONSE; (M5890)HALLMARK TNFA SIGNALING VIA NFKB	0.0	1.0	0.0	0.0	1.0	0.0	0.0	0.0	0.0	1.0	1.0	0.0	0.0	0.0	0.0	0.0	0.0	0.0	1.0	1.0
LAMTOR4	389541	symbol	H. sapiens	389541	H. sapiens	LAMTOR4	late endosomal/lysosomal adaptor, MAPK and MTOR activator 4	GO:0061462 protein localization to lysosome;GO:0032008 positive regulation of TOR signaling;GO:0071230 cellular response to amino acid stimulus			Vesicles(Enhanced)				0.0	0.0	0.0	0.0	0.0	0.0	0.0	0.0	0.0	0.0	0.0	0.0	1.0	0.0	0.0	0.0	0.0	0.0	0.0	0.0
CD2BP2	10421	symbol	H. sapiens	10421	H. sapiens	CD2BP2	CD2 cytoplasmic tail binding protein 2	GO:0000244 spliceosomal tri-snRNP complex assembly;GO:0000387 spliceosomal snRNP assembly;GO:0010923 negative regulation of phosphatase activity			Cytosol;Nuclear speckles(Enhanced)				0.0	0.0	0.0	0.0	0.0	0.0	0.0	0.0	0.0	0.0	0.0	0.0	0.0	0.0	0.0	0.0	0.0	0.0	0.0	0.0
DYNLT1	6993	symbol	H. sapiens	6993	H. sapiens	DYNLT1	dynein light chain Tctex-type 1	GO:0075521 microtubule-dependent intracellular transport of viral material towards nucleus;GO:0075519 microtubule-dependent intracellular transport of viral material;GO:0075606 transport of viral material towards nucleus			Nucleoplasm(Supported)		(M163)PID LIS1 PATHWAY; (M187)PID TRKR PATHWAY		1.0	0.0	0.0	0.0	0.0	0.0	0.0	0.0	0.0	0.0	0.0	0.0	0.0	0.0	0.0	0.0	1.0	0.0	0.0	0.0
FOLR3	2352	symbol	H. sapiens	2352	H. sapiens	FOLR3	folate receptor 3	GO:0015884 folic acid transport;GO:0043312 neutrophil degranulation;GO:0072337 modified amino acid transport				Folic Acid (Folic acid binding);EC145 (Folic acid binding)			1.0	0.0	0.0	0.0	0.0	0.0	0.0	0.0	0.0	0.0	0.0	0.0	0.0	0.0	0.0	0.0	0.0	0.0	0.0	0.0
EEF1G	1937	symbol	H. sapiens	1937	H. sapiens	EEF1G	eukaryotic translation elongation factor 1 gamma	GO:0006749 glutathione metabolic process;GO:0009615 response to virus;GO:0006414 translational elongation			Mitochondria(Approved)				0.0	0.0	0.0	0.0	0.0	0.0	0.0	0.0	0.0	0.0	0.0	0.0	0.0	0.0	0.0	0.0	0.0	0.0	0.0	0.0
SH3BP5L	80851	symbol	H. sapiens	80851	H. sapiens	SH3BP5L	SH3 binding domain protein 5 like	GO:0061099 negative regulation of protein tyrosine kinase activity;GO:0050732 negative regulation of peptidyl-tyrosine phosphorylation;GO:0061097 regulation of protein tyrosine kinase activity			Golgi apparatus;Nucleoplasm;Vesicles(Approved)				0.0	0.0	0.0	0.0	0.0	0.0	0.0	0.0	0.0	0.0	0.0	0.0	0.0	0.0	0.0	0.0	0.0	0.0	0.0	0.0
CTCF	10664	symbol	H. sapiens	10664	H. sapiens	CTCF	CCCTC-binding factor	GO:0070602 regulation of centromeric sister chromatid cohesion;GO:0040030 regulation of molecular function, epigenetic;GO:0016584 nucleosome positioning		Transcription factors/Zinc-coordinating DNA-binding domains	Nucleoplasm(Supported)			(M5925)HALLMARK E2F TARGETS; (M5901)HALLMARK G2M CHECKPOINT	0.0	0.0	0.0	0.0	0.0	0.0	0.0	1.0	0.0	0.0	0.0	0.0	0.0	0.0	0.0	0.0	0.0	0.0	0.0	0.0
LAMTOR5	10542	symbol	H. sapiens	10542	H. sapiens	LAMTOR5	late endosomal/lysosomal adaptor, MAPK and MTOR activator 5	GO:0043154 negative regulation of cysteine-type endopeptidase activity involved in apoptotic process;GO:0061462 protein localization to lysosome;GO:2000117 negative regulation of cysteine-type endopeptidase activity			Cytosol(Supported)			(M5938)HALLMARK REACTIVE OXIGEN SPECIES PATHWAY	0.0	0.0	0.0	0.0	0.0	0.0	0.0	0.0	1.0	0.0	0.0	0.0	1.0	0.0	0.0	0.0	1.0	0.0	0.0	0.0
CD3E	916	symbol	H. sapiens	916	H. sapiens	CD3E	CD3e molecule	GO:0002669 positive regulation of T cell anergy;GO:0045060 negative thymic T cell selection;GO:0002913 positive regulation of lymphocyte anergy		CD markers		Muromonab (Transmembrane signaling receptor activity)	(M290)PID IL12 STAT4 PATHWAY; (M196)PID IL23 PATHWAY; (M88)PID CD8 TCR PATHWAY	(M5950)HALLMARK ALLOGRAFT REJECTION	0.0	1.0	1.0	1.0	0.0	1.0	1.0	0.0	0.0	0.0	1.0	0.0	0.0	1.0	0.0	1.0	0.0	1.0	1.0	1.0
ZNF638	27332	symbol	H. sapiens	27332	H. sapiens	ZNF638	zinc finger protein 638	GO:0008380 RNA splicing;GO:0006396 RNA processing;GO:0006355 regulation of transcription, DNA-templated			Nucleoplasm(Enhanced)Vesicles(Supported)				0.0	0.0	0.0	0.0	0.0	0.0	0.0	0.0	0.0	0.0	0.0	0.0	0.0	0.0	0.0	0.0	0.0	0.0	0.0	0.0
DNAJC13	23317	symbol	H. sapiens	23317	H. sapiens	DNAJC13	DnaJ heat shock protein family (Hsp40) member C13	GO:1902954 regulation of early endosome to recycling endosome transport;GO:0061502 early endosome to recycling endosome transport;GO:2000641 regulation of early endosome to late endosome transport			Cytosol;Vesicles(Supported)				1.0	0.0	0.0	0.0	0.0	0.0	0.0	0.0	0.0	0.0	0.0	0.0	0.0	0.0	0.0	0.0	0.0	0.0	0.0	0.0
HSBP1	3281	symbol	H. sapiens	3281	H. sapiens	HSBP1	heat shock factor binding protein 1	GO:0035987 endodermal cell differentiation;GO:1900034 regulation of cellular response to heat;GO:0001706 endoderm formation							0.0	0.0	0.0	0.0	0.0	0.0	0.0	0.0	0.0	0.0	0.0	0.0	1.0	0.0	0.0	0.0	0.0	0.0	0.0	0.0
CBX1	10951	symbol	H. sapiens	10951	H. sapiens	CBX1	chromobox 1	GO:0045892 negative regulation of transcription, DNA-templated;GO:1903507 negative regulation of nucleic acid-templated transcription;GO:1902679 negative regulation of RNA biosynthetic process			Nuclear bodies;Nucleus(Supported)			(M5901)HALLMARK G2M CHECKPOINT	0.0	0.0	0.0	0.0	0.0	0.0	0.0	0.0	0.0	0.0	0.0	0.0	0.0	0.0	0.0	0.0	0.0	0.0	0.0	0.0
LYPLA2	11313	symbol	H. sapiens	11313	H. sapiens	LYPLA2	lysophospholipase II	GO:0002084 protein depalmitoylation;GO:0098734 macromolecule depalmitoylation;GO:0042159 lipoprotein catabolic process			Cytosol;Nucleoplasm(Uncertain)				0.0	0.0	0.0	0.0	0.0	0.0	0.0	0.0	0.0	0.0	0.0	0.0	0.0	0.0	0.0	0.0	0.0	0.0	0.0	0.0
PHF23	79142	symbol	H. sapiens	79142	H. sapiens	PHF23	PHD finger protein 23	GO:1901097 negative regulation of autophagosome maturation;GO:1902902 negative regulation of autophagosome assembly;GO:1901096 regulation of autophagosome maturation			Nucleoplasm(Enhanced)				0.0	0.0	1.0	0.0	0.0	0.0	0.0	0.0	0.0	0.0	0.0	0.0	0.0	0.0	0.0	0.0	0.0	0.0	0.0	0.0
SLTM	79811	symbol	H. sapiens	79811	H. sapiens	SLTM	SAFB like transcription modulator	GO:0050684 regulation of mRNA processing;GO:1903311 regulation of mRNA metabolic process;GO:0006397 mRNA processing			Nuclear bodies;Nucleoplasm(Enhanced)				0.0	0.0	0.0	0.0	0.0	0.0	0.0	0.0	0.0	0.0	0.0	0.0	0.0	0.0	0.0	0.0	0.0	0.0	0.0	0.0
AOC2	314	symbol	H. sapiens	314	H. sapiens	AOC2	amine oxidase, copper containing 2	GO:0006584 catecholamine metabolic process;GO:0009712 catechol-containing compound metabolic process;GO:0006805 xenobiotic metabolic process		Enzymes/ENZYME proteins/Oxidoreductases					0.0	0.0	0.0	0.0	0.0	0.0	0.0	0.0	0.0	0.0	0.0	0.0	0.0	0.0	0.0	0.0	0.0	0.0	0.0	0.0
NUDT5	11164	symbol	H. sapiens	11164	H. sapiens	NUDT5	nudix hydrolase 5	GO:0019303 D-ribose catabolic process;GO:1990966 ATP generation from poly-ADP-D-ribose;GO:0009191 ribonucleoside diphosphate catabolic process		Enzymes/ENZYME proteins/{Hydrolases,Transferases}	Centrosome;Nucleus;Vesicles(Approved)				0.0	0.0	0.0	0.0	0.0	0.0	0.0	1.0	0.0	0.0	0.0	0.0	0.0	0.0	0.0	0.0	0.0	0.0	0.0	0.0
KIAA0101	9768	gene_synonym	H. sapiens	9768	H. sapiens	PCLAF	PCNA clamp associated factor	GO:0019985 translesion synthesis;GO:0000731 DNA synthesis involved in DNA repair;GO:0006301 postreplication repair			Centrosome(Supported)				0.0	0.0	0.0	0.0	0.0	0.0	0.0	0.0	0.0	0.0	0.0	0.0	0.0	0.0	0.0	0.0	0.0	0.0	0.0	0.0
C11orf21	29125	symbol	H. sapiens	29125	H. sapiens	C11orf21	chromosome 11 open reading frame 21								0.0	0.0	0.0	0.0	0.0	0.0	0.0	0.0	0.0	0.0	0.0	0.0	0.0	0.0	0.0	0.0	0.0	0.0	0.0	0.0
EPHB4	2050	symbol	H. sapiens	2050	H. sapiens	EPHB4	EPH receptor B4	GO:0002042 cell migration involved in sprouting angiogenesis;GO:0002040 sprouting angiogenesis;GO:0043534 blood vessel endothelial cell migration	Tyr protein kinase family	Enzymes/{ENZYME proteins/Transferases,Kinases/Tyr protein kinases}		XL647 (Transmembrane receptor protein tyrosine kinase activity);N-(5-chloro-1,3-benzodioxol-4-yl)-6-methoxy-7-(3-piperidin-1-ylpropoxy)quinazolin-4-amine (Transmembrane receptor protein tyrosine kinase activity);N'-(5-CHLORO-1,3-BENZODIOXOL-4-YL)-N-(3,4,5- TRIMETHOXYPHENYL)PYRIMIDINE-2,4-DIAMINE (Transmembrane receptor protein tyrosine kinase activity);N'-(3-CHLORO-4-METHOXY-PHENYL)-N-(3,4,5-TRIM…	(M257)PID EPHRINB REV PATHWAY; (M62)PID EPHB FWD PATHWAY	(M5916)HALLMARK APICAL SURFACE	0.0	0.0	0.0	0.0	0.0	0.0	0.0	0.0	0.0	0.0	0.0	0.0	0.0	0.0	0.0	0.0	0.0	0.0	0.0	0.0
HSPA1B	3304	symbol	H. sapiens	3304	H. sapiens	HSPA1B	heat shock protein family A (Hsp70) member 1B	GO:0070434 positive regulation of nucleotide-binding oligomerization domain containing 2 signaling pathway;GO:0070426 positive regulation of nucleotide-binding oligomerization domain containing signaling pathway;GO:0070432 regulation of nucleotide-binding oligomerization domain containing 2 signaling pathway			Nucleoplasm;Vesicles(Approved)				1.0	1.0	1.0	1.0	0.0	0.0	1.0	0.0	0.0	1.0	0.0	0.0	1.0	0.0	1.0	0.0	1.0	0.0	0.0	0.0
PRMT5	10419	symbol	H. sapiens	10419	H. sapiens	PRMT5	protein arginine methyltransferase 5	GO:1904992 positive regulation of adenylate cyclase-inhibiting dopamine receptor signaling pathway;GO:1904990 regulation of adenylate cyclase-inhibiting dopamine receptor signaling pathway;GO:0019918 peptidyl-arginine methylation, to symmetrical-dimethyl arginine		Enzymes/ENZYME proteins/Transferases	Cytosol;Nucleus(Approved)		(M261)PID P53 REGULATION PATHWAY; (M101)PID HDAC CLASSI PATHWAY; (M40)PID E2F PATHWAY	(M5901)HALLMARK G2M CHECKPOINT	0.0	0.0	0.0	0.0	0.0	0.0	0.0	1.0	0.0	0.0	0.0	0.0	0.0	0.0	0.0	0.0	0.0	0.0	0.0	0.0
UBTF	7343	symbol	H. sapiens	7343	H. sapiens	UBTF	upstream binding transcription factor	GO:1902659 regulation of glucose mediated signaling pathway;GO:0010255 glucose mediated signaling pathway;GO:0009757 hexose mediated signaling		Transcription factors/Other all-alpha-helical DNA-binding domains	Nucleoli fibrillar center(Enhanced)		(M279)PID RB 1PATHWAY; (M66)PID MYC ACTIV PATHWAY		0.0	0.0	0.0	0.0	0.0	0.0	0.0	0.0	0.0	0.0	0.0	0.0	0.0	0.0	0.0	0.0	0.0	0.0	0.0	0.0
BICD2	23299	symbol	H. sapiens	23299	H. sapiens	BICD2	BICD cargo adaptor 2	GO:0072385 minus-end-directed organelle transport along microtubule;GO:0072393 microtubule anchoring at microtubule organizing center;GO:0034453 microtubule anchoring			Golgi apparatus(Supported)Cytosol(Approved)Plasma membrane(Uncertain)				0.0	0.0	0.0	0.0	0.0	0.0	0.0	0.0	0.0	0.0	0.0	0.0	0.0	0.0	0.0	0.0	0.0	0.0	0.0	0.0
BCORL1	63035	symbol	H. sapiens	63035	H. sapiens	BCORL1	BCL6 corepressor like 1	GO:0016569 covalent chromatin modification;GO:0006325 chromatin organization;GO:0051276 chromosome organization			Nucleoplasm(Supported)Plasma membrane(Uncertain)				0.0	0.0	0.0	0.0	0.0	0.0	0.0	1.0	0.0	0.0	0.0	0.0	0.0	0.0	0.0	0.0	0.0	0.0	0.0	0.0
FAM104A	84923	symbol	H. sapiens	84923	H. sapiens	FAM104A	family with sequence similarity 104 member A				Cytosol;Nucleoplasm(Approved)				0.0	0.0	0.0	0.0	0.0	0.0	0.0	0.0	0.0	0.0	0.0	0.0	0.0	0.0	0.0	0.0	0.0	0.0	0.0	0.0
XPO1	7514	symbol	H. sapiens	7514	H. sapiens	XPO1	exportin 1	GO:0000056 ribosomal small subunit export from nucleus;GO:0000055 ribosomal large subunit export from nucleus;GO:0000054 ribosomal subunit export from nucleus		Transporters/Transporter channels and pores	Cytosol;Nuclear membrane;Nucleoplasm;Vesicles(Enhanced)		(M140)PID RANBP2 PATHWAY; (M37)PID NFKAPPAB CANONICAL PATHWAY; (M30)PID HDAC CLASSII PATHWAY	(M5926)HALLMARK MYC TARGETS V1; (M5901)HALLMARK G2M CHECKPOINT; (M5925)HALLMARK E2F TARGETS	0.0	0.0	0.0	0.0	0.0	0.0	0.0	0.0	0.0	0.0	0.0	0.0	1.0	0.0	0.0	0.0	1.0	0.0	0.0	0.0
NOMO3	408050	symbol	H. sapiens	408050	H. sapiens	NOMO3	NODAL modulator 3	GO:0008150 biological_process							0.0	0.0	0.0	0.0	0.0	0.0	0.0	0.0	0.0	0.0	0.0	0.0	0.0	0.0	0.0	0.0	0.0	0.0	0.0	0.0
ANXA1	301	symbol	H. sapiens	301	H. sapiens	ANXA1	annexin A1	GO:0045629 negative regulation of T-helper 2 cell differentiation;GO:0045627 positive regulation of T-helper 1 cell differentiation;GO:0045625 regulation of T-helper 1 cell differentiation		Transporters/Transporter channels and pores	Cytosol;Nucleoplasm;Plasma membrane(Enhanced)	Amcinonide (Structural molecule activity);Hydrocortisone (Structural molecule activity);Dexamethasone (Structural molecule activity)	(M5880)NABA ECM AFFILIATED; (M5885)NABA MATRISOME ASSOCIATED; (M5889)NABA MATRISOME	(M5946)HALLMARK COAGULATION; (M5902)HALLMARK APOPTOSIS	1.0	1.0	0.0	1.0	1.0	0.0	1.0	0.0	1.0	1.0	0.0	0.0	0.0	0.0	0.0	1.0	0.0	0.0	0.0	1.0
XPC	7508	symbol	H. sapiens	7508	H. sapiens	XPC	XPC complex subunit, DNA damage recognition and repair factor	GO:0000717 nucleotide-excision repair, DNA duplex unwinding;GO:0031573 intra-S DNA damage checkpoint;GO:0070914 UV-damage excision repair			Nucleus;Plasma membrane(Enhanced)			(M5898)HALLMARK DNA REPAIR; (M5939)HALLMARK P53 PATHWAY	0.0	0.0	0.0	0.0	0.0	0.0	0.0	0.0	0.0	0.0	0.0	0.0	0.0	0.0	0.0	0.0	0.0	0.0	0.0	0.0
SULT1B1	27284	symbol	H. sapiens	27284	H. sapiens	SULT1B1	sulfotransferase family 1B member 1	GO:0050427 3'-phosphoadenosine 5'-phosphosulfate metabolic process;GO:0006068 ethanol catabolic process;GO:0034035 purine ribonucleoside bisphosphate metabolic process			Golgi apparatus;Nucleoplasm(Approved)	Adenosine-3'-5'-Diphosphate (Sulfotransferase activity)		(M5948)HALLMARK BILE ACID METABOLISM	0.0	0.0	0.0	0.0	0.0	0.0	0.0	0.0	0.0	0.0	0.0	0.0	0.0	0.0	0.0	0.0	0.0	0.0	0.0	0.0
BRPF1	7862	symbol	H. sapiens	7862	H. sapiens	BRPF1	bromodomain and PHD finger containing 1	GO:0043972 histone H3-K23 acetylation;GO:0043966 histone H3 acetylation;GO:0016573 histone acetylation			Cytosol;Plasma membrane(Approved)				0.0	0.0	0.0	0.0	0.0	0.0	0.0	1.0	0.0	0.0	0.0	0.0	0.0	0.0	0.0	0.0	0.0	0.0	0.0	0.0
MAT2A	4144	symbol	H. sapiens	4144	H. sapiens	MAT2A	methionine adenosyltransferase 2A	GO:0006556 S-adenosylmethionine biosynthetic process;GO:0034214 protein hexamerization;GO:0046500 S-adenosylmethionine metabolic process		Enzymes/ENZYME proteins/Transferases	Cytosol;Nucleoplasm(Approved)	S-Adenosylmethionine (Methionine adenosyltransferase activity)	(M195)PID CMYB PATHWAY		0.0	0.0	0.0	0.0	0.0	0.0	0.0	0.0	0.0	0.0	0.0	0.0	0.0	0.0	0.0	0.0	0.0	1.0	0.0	0.0
ABAT	18	symbol	H. sapiens	18	H. sapiens	ABAT	4-aminobutyrate aminotransferase	GO:1904450 positive regulation of aspartate secretion;GO:1904448 regulation of aspartate secretion;GO:0014053 negative regulation of gamma-aminobutyric acid secretion		Enzymes/ENZYME proteins/Transferases	Mitochondria(Supported)	Pyridoxal Phosphate (Succinate-semialdehyde dehydrogenase binding);Pyruvic acid (Succinate-semialdehyde dehydrogenase binding);L-Glutamic Acid (Succinate-semialdehyde dehydrogenase binding);L-Alanine (Succinate-semialdehyde dehydrogenase binding);Valproic Acid (Succinate-semialdehyde dehydrogenase binding);Phenelzine (Succinate-semialdehyde dehydrogenase binding);Vigabatrin (Succinate-semialdehyd…		(M5906)HALLMARK ESTROGEN RESPONSE EARLY; (M5939)HALLMARK P53 PATHWAY	0.0	1.0	0.0	1.0	1.0	0.0	0.0	0.0	0.0	0.0	0.0	0.0	0.0	0.0	0.0	0.0	0.0	0.0	0.0	0.0
DNMT3A	1788	symbol	H. sapiens	1788	H. sapiens	DNMT3A	DNA methyltransferase 3 alpha	GO:0090116 C-5 methylation of cytosine;GO:0043045 DNA methylation involved in embryo development;GO:0032776 DNA methylation on cytosine		Enzymes/ENZYME proteins/Transferases;Transcription factors/Zinc-coordinating DNA-binding domains	Nucleoplasm(Supported)		(M254)PID MYC REPRESS PATHWAY		0.0	0.0	0.0	0.0	0.0	0.0	0.0	1.0	1.0	0.0	0.0	0.0	0.0	0.0	0.0	0.0	0.0	0.0	0.0	0.0
REEP5	7905	symbol	H. sapiens	7905	H. sapiens	REEP5	receptor accessory protein 5	GO:0008150 biological_process			Endoplasmic reticulum(Approved)			(M5905)HALLMARK ADIPOGENESIS	0.0	0.0	0.0	0.0	0.0	0.0	0.0	0.0	0.0	0.0	0.0	0.0	0.0	0.0	0.0	0.0	0.0	0.0	0.0	0.0
SOS1	6654	symbol	H. sapiens	6654	H. sapiens	SOS1	SOS Ras/Rac guanine nucleotide exchange factor 1	GO:2000973 regulation of pro-B cell differentiation;GO:1904693 midbrain morphogenesis;GO:1905456 regulation of lymphoid progenitor cell differentiation		RAS pathway related proteins	Cytosol;Nucleoli;Nucleus(Uncertain)		(M18895)SA TRKA RECEPTOR; (M12771)SA PTEN PATHWAY; (M206)PID PDGFRA PATHWAY	(M5893)HALLMARK MITOTIC SPINDLE	0.0	1.0	1.0	0.0	0.0	0.0	1.0	0.0	1.0	1.0	0.0	0.0	1.0	0.0	0.0	0.0	0.0	0.0	0.0	0.0
EDEM3	80267	symbol	H. sapiens	80267	H. sapiens	EDEM3	ER degradation enhancing alpha-mannosidase like protein 3	GO:1904382 mannose trimming involved in glycoprotein ERAD pathway;GO:0097466 ubiquitin-dependent glycoprotein ERAD pathway;GO:0035977 protein deglycosylation involved in glycoprotein catabolic process		Enzymes/ENZYME proteins/Hydrolases	Endoplasmic reticulum(Approved)				0.0	0.0	0.0	0.0	0.0	0.0	0.0	0.0	0.0	0.0	0.0	0.0	0.0	0.0	0.0	0.0	0.0	0.0	0.0	0.0
PTPRN2	5799	symbol	H. sapiens	5799	H. sapiens	PTPRN2	protein tyrosine phosphatase, receptor type N2	GO:0035773 insulin secretion involved in cellular response to glucose stimulus;GO:0043312 neutrophil degranulation;GO:0034260 negative regulation of GTPase activity		Enzymes/ENZYME proteins/Hydrolases	Vesicles(Supported)				1.0	0.0	0.0	0.0	0.0	0.0	0.0	0.0	0.0	0.0	0.0	0.0	0.0	0.0	0.0	0.0	0.0	0.0	0.0	0.0
PSMD13	5719	symbol	H. sapiens	5719	H. sapiens	PSMD13	proteasome 26S subunit, non-ATPase 13	GO:0002223 stimulatory C-type lectin receptor signaling pathway;GO:0002479 antigen processing and presentation of exogenous peptide antigen via MHC class I, TAP-dependent;GO:0002220 innate immune response activating cell surface receptor signaling pathway			Cytosol;Nuclear speckles(Approved)			(M5924)HALLMARK MTORC1 SIGNALING	1.0	1.0	1.0	1.0	0.0	0.0	1.0	0.0	0.0	1.0	1.0	0.0	1.0	0.0	0.0	0.0	0.0	0.0	0.0	0.0
LGALSL	29094	symbol	H. sapiens	29094	H. sapiens	LGALSL	galectin like				Nucleoplasm(Approved)		(M5880)NABA ECM AFFILIATED; (M5885)NABA MATRISOME ASSOCIATED; (M5889)NABA MATRISOME		0.0	0.0	0.0	0.0	0.0	0.0	0.0	0.0	0.0	0.0	0.0	0.0	0.0	0.0	0.0	0.0	0.0	0.0	0.0	0.0
SETDB1	9869	symbol	H. sapiens	9869	H. sapiens	SETDB1	SET domain bifurcated 1	GO:0090309 positive regulation of methylation-dependent chromatin silencing;GO:0090308 regulation of methylation-dependent chromatin silencing;GO:0031937 positive regulation of chromatin silencing		Enzymes/ENZYME proteins/Transferases	Nucleoplasm(Enhanced)Cytosol(Uncertain)		(M23)PID WNT NONCANONICAL PATHWAY		0.0	0.0	0.0	0.0	0.0	0.0	0.0	1.0	0.0	0.0	0.0	0.0	0.0	0.0	0.0	0.0	0.0	0.0	0.0	0.0
AES	166	symbol	H. sapiens	166	H. sapiens	AES	amino-terminal enhancer of split	GO:2000210 positive regulation of anoikis;GO:2000209 regulation of anoikis;GO:0043276 anoikis			Nucleoplasm(Supported)		(M70)PID PS1 PATHWAY; (M223)PID BETA CATENIN NUC PATHWAY; (M5493)WNT SIGNALING		0.0	0.0	0.0	0.0	0.0	0.0	0.0	0.0	1.0	0.0	0.0	0.0	0.0	0.0	0.0	0.0	0.0	0.0	0.0	0.0
ANKZF1	55139	symbol	H. sapiens	55139	H. sapiens	ANKZF1	ankyrin repeat and zinc finger domain containing 1	GO:0072671 mitochondria-associated ubiquitin-dependent protein catabolic process;GO:0071630 nuclear protein quality control by the ubiquitin-proteasome system;GO:0030433 ubiquitin-dependent ERAD pathway			Cytosol;Nuclear bodies;Nucleoplasm(Approved)			(M5891)HALLMARK HYPOXIA; (M5937)HALLMARK GLYCOLYSIS	0.0	0.0	0.0	0.0	0.0	0.0	0.0	0.0	0.0	0.0	0.0	0.0	0.0	0.0	0.0	0.0	0.0	0.0	0.0	0.0
RER1	11079	symbol	H. sapiens	11079	H. sapiens	RER1	retention in endoplasmic reticulum sorting receptor 1	GO:0071340 skeletal muscle acetylcholine-gated channel clustering;GO:1903078 positive regulation of protein localization to plasma membrane;GO:1904377 positive regulation of protein localization to cell periphery		Transporters	Golgi apparatus(Enhanced)			(M5910)HALLMARK PROTEIN SECRETION	0.0	0.0	0.0	0.0	0.0	0.0	0.0	0.0	0.0	0.0	0.0	0.0	0.0	0.0	0.0	0.0	0.0	0.0	0.0	0.0
DDX42	11325	symbol	H. sapiens	11325	H. sapiens	DDX42	DEAD-box helicase 42	GO:0010501 RNA secondary structure unwinding;GO:0000398 mRNA splicing, via spliceosome;GO:0000377 RNA splicing, via transesterification reactions with bulged adenosine as nucleophile		Enzymes/ENZYME proteins/Hydrolases	Nuclear speckles(Enhanced)				0.0	0.0	0.0	0.0	0.0	0.0	0.0	0.0	0.0	0.0	0.0	0.0	0.0	0.0	0.0	0.0	0.0	0.0	0.0	0.0
TBCC	6903	symbol	H. sapiens	6903	H. sapiens	TBCC	tubulin folding cofactor C	GO:0007023 post-chaperonin tubulin folding pathway;GO:0007021 tubulin complex assembly;GO:0006457 protein folding			Cytosol(Enhanced)				0.0	0.0	0.0	0.0	0.0	0.0	0.0	0.0	0.0	0.0	0.0	0.0	0.0	0.0	0.0	0.0	0.0	0.0	0.0	0.0
RPL4	6124	symbol	H. sapiens	6124	H. sapiens	RPL4	ribosomal protein L4	GO:0006614 SRP-dependent cotranslational protein targeting to membrane;GO:0006613 cotranslational protein targeting to membrane;GO:0000184 nuclear-transcribed mRNA catabolic process, nonsense-mediated decay		Ribosomal proteins	Cytosol;Endoplasmic reticulum;Nucleoli(Supported)Nuclear bodies(Approved)				0.0	0.0	0.0	0.0	0.0	0.0	0.0	0.0	0.0	0.0	0.0	0.0	0.0	0.0	0.0	0.0	1.0	0.0	0.0	0.0
IFI35	3430	symbol	H. sapiens	3430	H. sapiens	IFI35	interferon induced protein 35	GO:0060337 type I interferon signaling pathway;GO:0071357 cellular response to type I interferon;GO:0034340 response to type I interferon			Cytosol;Nucleoplasm(Approved)			(M5911)HALLMARK INTERFERON ALPHA RESPONSE; (M5913)HALLMARK INTERFERON GAMMA RESPONSE	0.0	0.0	0.0	0.0	0.0	0.0	0.0	0.0	0.0	1.0	0.0	0.0	0.0	0.0	0.0	0.0	0.0	0.0	0.0	0.0
BTK	695	symbol	H. sapiens	695	H. sapiens	BTK	Bruton tyrosine kinase	GO:0002344 B cell affinity maturation;GO:0002721 regulation of B cell cytokine production;GO:0001805 positive regulation of type III hypersensitivity	Tyr protein kinase family	Enzymes/{ENZYME proteins/Transferases,Kinases/Tyr protein kinases}	Vesicles(Supported)	Inositol 1,3,4,5-Tetrakisphosphate (Protein tyrosine kinase activity);XL418 (Protein tyrosine kinase activity);Ibrutinib (Protein tyrosine kinase activity)	(M15743)ST GA12 PATHWAY; (M233)PID EPO PATHWAY; (M1315)SIG PIP3 SIGNALING IN B LYMPHOCYTES		1.0	1.0	1.0	1.0	1.0	0.0	1.0	0.0	0.0	0.0	1.0	0.0	1.0	0.0	0.0	0.0	0.0	0.0	0.0	1.0
GAB1	2549	symbol	H. sapiens	2549	H. sapiens	GAB1	GRB2 associated binding protein 1	GO:0090668 endothelial cell chemotaxis to vascular endothelial growth factor;GO:0090667 cell chemotaxis to vascular endothelial growth factor;GO:0038089 positive regulation of cell migration by vascular endothelial growth factor signaling pathway		RAS pathway related proteins	Vesicles(Approved)		(M233)PID EPO PATHWAY; (M127)PID ERBB1 RECEPTOR PROXIMAL PATHWAY; (M1315)SIG PIP3 SIGNALING IN B LYMPHOCYTES		0.0	0.0	0.0	0.0	0.0	0.0	0.0	0.0	0.0	0.0	0.0	0.0	0.0	0.0	0.0	0.0	0.0	0.0	0.0	0.0
ING1	3621	symbol	H. sapiens	3621	H. sapiens	ING1	inhibitor of growth family member 1	GO:0030308 negative regulation of cell growth;GO:0045926 negative regulation of growth;GO:0001558 regulation of cell growth			Cytosol;Nucleoplasm(Approved)				0.0	0.0	0.0	0.0	0.0	0.0	0.0	0.0	0.0	0.0	0.0	0.0	0.0	0.0	0.0	0.0	0.0	0.0	0.0	0.0
SIGLEC9	27180	symbol	H. sapiens	27180	H. sapiens	SIGLEC9	sialic acid binding Ig like lectin 9	GO:0043312 neutrophil degranulation;GO:0002283 neutrophil activation involved in immune response;GO:0042119 neutrophil activation							1.0	0.0	1.0	0.0	0.0	1.0	0.0	0.0	0.0	0.0	0.0	0.0	0.0	0.0	0.0	0.0	0.0	0.0	0.0	0.0
DR1	1810	symbol	H. sapiens	1810	H. sapiens	DR1	down-regulator of transcription 1	GO:0043966 histone H3 acetylation;GO:0016573 histone acetylation;GO:0018393 internal peptidyl-lysine acetylation			Nucleus(Supported)			(M5901)HALLMARK G2M CHECKPOINT	0.0	0.0	0.0	0.0	0.0	0.0	0.0	1.0	0.0	0.0	0.0	0.0	0.0	0.0	0.0	0.0	0.0	0.0	0.0	0.0
ARNT	405	symbol	H. sapiens	405	H. sapiens	ARNT	aryl hydrocarbon receptor nuclear translocator	GO:0045821 positive regulation of glycolytic process;GO:2001171 positive regulation of ATP biosynthetic process;GO:0006110 regulation of glycolytic process		Transcription factors/Basic domains	Nuclear bodies;Nucleus(Supported)		(M180)PID HIF1A PATHWAY; (M44)PID HIF2PATHWAY; (M288)PID HES HEY PATHWAY		0.0	1.0	0.0	1.0	0.0	0.0	0.0	1.0	0.0	0.0	0.0	0.0	1.0	0.0	1.0	0.0	0.0	0.0	0.0	0.0
HDAC1	3065	symbol	H. sapiens	3065	H. sapiens	HDAC1	histone deacetylase 1	GO:0061198 fungiform papilla formation;GO:0043922 negative regulation by host of viral transcription;GO:0060766 negative regulation of androgen receptor signaling pathway		Enzymes/ENZYME proteins/Hydrolases	Nucleoplasm(Enhanced)	Vorinostat (Transcription regulatory region sequence-specific dna binding);Belinostat (Transcription regulatory region sequence-specific dna binding);SB939 (Transcription regulatory region sequence-specific dna binding);MGCD-0103 (Transcription regulatory region sequence-specific dna binding);CRA-024781 (Transcription regulatory region sequence-specific dna binding);Romidepsin (Transcription regu…	(M140)PID RANBP2 PATHWAY; (M182)PID IL3 PATHWAY; (M207)PID RETINOIC ACID PATHWAY	(M5896)HALLMARK TGF BETA SIGNALING	0.0	1.0	0.0	1.0	0.0	0.0	0.0	1.0	1.0	0.0	0.0	1.0	1.0	0.0	1.0	0.0	1.0	0.0	0.0	0.0
NEDD8	4738	symbol	H. sapiens	4738	H. sapiens	NEDD8	neural precursor cell expressed, developmentally down-regulated 8	GO:0006879 cellular iron ion homeostasis;GO:0045116 protein neddylation;GO:0055072 iron ion homeostasis			Nucleoplasm(Enhanced)Cytosol(Supported)		(M119)PID ERB GENOMIC PATHWAY; (M261)PID P53 REGULATION PATHWAY; (M200)PID ERA GENOMIC PATHWAY		0.0	0.0	1.0	0.0	0.0	0.0	0.0	0.0	0.0	0.0	0.0	0.0	0.0	0.0	0.0	0.0	0.0	0.0	0.0	0.0
CARD6	84674	symbol	H. sapiens	84674	H. sapiens	CARD6	caspase recruitment domain family member 6	GO:0042981 regulation of apoptotic process;GO:0043067 regulation of programmed cell death;GO:0006915 apoptotic process			Cytosol;Focal adhesion sites(Approved)				0.0	0.0	0.0	0.0	0.0	0.0	0.0	0.0	0.0	0.0	0.0	0.0	0.0	0.0	0.0	0.0	0.0	0.0	0.0	0.0
ZNF213	7760	symbol	H. sapiens	7760	H. sapiens	ZNF213	zinc finger protein 213	GO:0006355 regulation of transcription, DNA-templated;GO:1903506 regulation of nucleic acid-templated transcription;GO:0006351 transcription, DNA-templated		Transcription factors/Zinc-coordinating DNA-binding domains	Cytosol;Nuclear membrane;Nucleus;Vesicles(Approved)				0.0	0.0	0.0	0.0	0.0	0.0	0.0	0.0	0.0	0.0	0.0	0.0	0.0	0.0	0.0	0.0	0.0	0.0	0.0	0.0
TMEM63A	9725	symbol	H. sapiens	9725	H. sapiens	TMEM63A	transmembrane protein 63A	GO:0043312 neutrophil degranulation;GO:0002283 neutrophil activation involved in immune response;GO:0042119 neutrophil activation			Microtubule organizing center;Vesicles(Enhanced)				1.0	0.0	0.0	0.0	0.0	0.0	0.0	0.0	0.0	0.0	0.0	0.0	0.0	0.0	0.0	0.0	0.0	0.0	0.0	0.0
TNPO3	23534	symbol	H. sapiens	23534	H. sapiens	TNPO3	transportin 3	GO:0035048 splicing factor protein import into nucleus;GO:0006606 protein import into nucleus;GO:0051170 nuclear import			Vesicles(Enhanced)				0.0	0.0	0.0	0.0	0.0	0.0	0.0	0.0	0.0	0.0	0.0	0.0	0.0	0.0	0.0	0.0	0.0	0.0	0.0	0.0
MGAM2	93432	symbol	H. sapiens	93432	H. sapiens	MGAM2	maltase-glucoamylase 2 (putative)			Enzymes/ENZYME proteins/Hydrolases	Cytosol;Vesicles(Approved)				0.0	0.0	0.0	0.0	0.0	0.0	0.0	0.0	0.0	0.0	0.0	0.0	0.0	0.0	0.0	0.0	0.0	0.0	0.0	0.0
UGP2	7360	symbol	H. sapiens	7360	H. sapiens	UGP2	UDP-glucose pyrophosphorylase 2	GO:0006065 UDP-glucuronate biosynthetic process;GO:0046398 UDP-glucuronate metabolic process;GO:0019255 glucose 1-phosphate metabolic process		Enzymes/ENZYME proteins/Transferases	Centrosome;Mitochondria;Nucleoplasm(Approved)			(M5937)HALLMARK GLYCOLYSIS; (M5891)HALLMARK HYPOXIA	0.0	0.0	0.0	0.0	0.0	0.0	0.0	0.0	0.0	0.0	0.0	0.0	0.0	0.0	0.0	0.0	0.0	0.0	0.0	0.0
MCU	90550	symbol	H. sapiens	90550	H. sapiens	MCU	mitochondrial calcium uniporter	GO:0051561 positive regulation of mitochondrial calcium ion concentration;GO:0036444 calcium import into the mitochondrion;GO:0051560 mitochondrial calcium ion homeostasis			Mitochondria(Supported)				0.0	0.0	0.0	0.0	0.0	0.0	0.0	0.0	0.0	0.0	0.0	0.0	0.0	0.0	0.0	0.0	0.0	0.0	0.0	0.0
FAM219A	203259	symbol	H. sapiens	203259	H. sapiens	FAM219A	family with sequence similarity 219 member A				Golgi apparatus;Nucleoplasm;Vesicles(Supported)				0.0	0.0	0.0	0.0	0.0	0.0	0.0	0.0	0.0	0.0	0.0	0.0	0.0	0.0	0.0	0.0	0.0	0.0	0.0	0.0
TUBA1C	84790	symbol	H. sapiens	84790	H. sapiens	TUBA1C	tubulin alpha 1c	GO:0030705 cytoskeleton-dependent intracellular transport;GO:0051301 cell division;GO:0007017 microtubule-based process			Microtubules(Supported)	Epothilone D (Structural molecule activity);Epothilone B (Structural molecule activity);CYT997 (Structural molecule activity);2-MERCAPTO-N-[1,2,3,10-TETRAMETHOXY-9-OXO-5,6,7,9-TETRAHYDRO-BENZO[A]HEPTALEN-7-YL]ACETAMIDE (Structural molecule activity)			0.0	0.0	1.0	0.0	0.0	0.0	0.0	0.0	0.0	0.0	0.0	0.0	1.0	0.0	0.0	0.0	0.0	0.0	0.0	0.0
PPIP5K2	23262	symbol	H. sapiens	23262	H. sapiens	PPIP5K2	diphosphoinositol pentakisphosphate kinase 2	GO:0032958 inositol phosphate biosynthetic process;GO:0006020 inositol metabolic process;GO:0043647 inositol phosphate metabolic process		Enzymes/ENZYME proteins/Transferases	Vesicles(Approved)				0.0	0.0	0.0	0.0	0.0	0.0	0.0	0.0	0.0	0.0	0.0	0.0	0.0	0.0	0.0	0.0	0.0	0.0	0.0	0.0
NF1	4763	symbol	H. sapiens	4763	H. sapiens	NF1	neurofibromin 1	GO:0061534 gamma-aminobutyric acid secretion, neurotransmission;GO:0045762 positive regulation of adenylate cyclase activity;GO:0021897 forebrain astrocyte development		RAS pathway related proteins	Mitochondria(Approved)		(M269)PID RAS PATHWAY; (M240)PID SYNDECAN 2 PATHWAY; (M106)PID HNF3B PATHWAY	(M5919)HALLMARK HEDGEHOG SIGNALING; (M5915)HALLMARK APICAL JUNCTION; (M5893)HALLMARK MITOTIC SPINDLE	0.0	1.0	0.0	0.0	1.0	0.0	0.0	0.0	1.0	0.0	0.0	0.0	0.0	0.0	1.0	0.0	0.0	0.0	0.0	0.0
JKAMP	51528	symbol	H. sapiens	51528	H. sapiens	JKAMP	JNK1/MAPK8 associated membrane protein	GO:0030433 ubiquitin-dependent ERAD pathway;GO:0036503 ERAD pathway;GO:0043161 proteasome-mediated ubiquitin-dependent protein catabolic process			Nucleoplasm;Vesicles(Approved)				0.0	0.0	0.0	0.0	0.0	0.0	0.0	0.0	0.0	0.0	0.0	0.0	0.0	0.0	0.0	0.0	0.0	0.0	0.0	0.0
TPST2	8459	symbol	H. sapiens	8459	H. sapiens	TPST2	tyrosylprotein sulfotransferase 2	GO:0006478 peptidyl-tyrosine sulfation;GO:0050427 3'-phosphoadenosine 5'-phosphosulfate metabolic process;GO:0034035 purine ribonucleoside bisphosphate metabolic process		Enzymes/ENZYME proteins/Transferases				(M5891)HALLMARK HYPOXIA	0.0	0.0	0.0	0.0	0.0	0.0	0.0	0.0	0.0	0.0	0.0	0.0	0.0	0.0	0.0	0.0	0.0	0.0	0.0	0.0
SLC2A1	6513	symbol	H. sapiens	6513	H. sapiens	SLC2A1	solute carrier family 2 member 1	GO:0005989 lactose biosynthetic process;GO:0005988 lactose metabolic process;GO:0070837 dehydroascorbic acid transport		Transporters/Electrochemical Potential-driven transporters	Plasma membrane(Enhanced)		(M44)PID HIF2PATHWAY; (M255)PID HIF1 TFPATHWAY; (M66)PID MYC ACTIV PATHWAY	(M5923)HALLMARK PI3K AKT MTOR SIGNALING; (M5924)HALLMARK MTORC1 SIGNALING; (M5945)HALLMARK HEME METABOLISM	0.0	0.0	0.0	0.0	0.0	0.0	0.0	0.0	0.0	0.0	0.0	0.0	0.0	0.0	0.0	0.0	0.0	0.0	0.0	0.0
DPP8	54878	symbol	H. sapiens	54878	H. sapiens	DPP8	dipeptidyl peptidase 8	GO:0006955 immune response;GO:0006508 proteolysis;GO:0002376 immune system process		Enzymes/{ENZYME proteins/Hydrolases,Peptidases/Serine-type peptidases}	Cytosol(Supported)				0.0	0.0	0.0	0.0	0.0	0.0	0.0	0.0	0.0	0.0	0.0	0.0	0.0	0.0	0.0	0.0	0.0	0.0	0.0	0.0
DMTF1	9988	symbol	H. sapiens	9988	H. sapiens	DMTF1	cyclin D binding myb like transcription factor 1	GO:0006357 regulation of transcription by RNA polymerase II;GO:0006366 transcription by RNA polymerase II;GO:0007049 cell cycle		Transcription factors/Helix-turn-helix domains	Nucleoplasm(Supported)		(M65)PID FRA PATHWAY; (M167)PID AP1 PATHWAY		0.0	0.0	0.0	0.0	0.0	0.0	0.0	0.0	0.0	0.0	0.0	0.0	0.0	0.0	0.0	0.0	0.0	0.0	0.0	0.0
TSHZ3	57616	symbol	H. sapiens	57616	H. sapiens	TSHZ3	teashirt zinc finger homeobox 3	GO:0002087 regulation of respiratory gaseous exchange by neurological system process;GO:0051968 positive regulation of synaptic transmission, glutamatergic;GO:0044065 regulation of respiratory system process		Transcription factors/Helix-turn-helix domains	Nucleoplasm(Supported)				0.0	0.0	0.0	0.0	0.0	0.0	0.0	0.0	0.0	0.0	0.0	0.0	0.0	0.0	0.0	0.0	0.0	0.0	0.0	0.0
BST2	684	symbol	H. sapiens	684	H. sapiens	BST2	bone marrow stromal cell antigen 2	GO:0002737 negative regulation of plasmacytoid dendritic cell cytokine production;GO:0002736 regulation of plasmacytoid dendritic cell cytokine production;GO:1901253 negative regulation of intracellular transport of viral material		CD markers	Cytosol;Golgi apparatus;Plasma membrane(Supported)			(M5911)HALLMARK INTERFERON ALPHA RESPONSE; (M5913)HALLMARK INTERFERON GAMMA RESPONSE; (M5932)HALLMARK INFLAMMATORY RESPONSE	1.0	1.0	0.0	1.0	1.0	0.0	0.0	0.0	1.0	1.0	0.0	0.0	0.0	0.0	0.0	0.0	1.0	0.0	0.0	1.0
GOLPH3	64083	symbol	H. sapiens	64083	H. sapiens	GOLPH3	golgi phosphoprotein 3	GO:0090164 asymmetric Golgi ribbon formation;GO:0045053 protein retention in Golgi apparatus;GO:0050901 leukocyte tethering or rolling			Golgi apparatus;Vesicles(Supported)				0.0	1.0	0.0	0.0	0.0	0.0	0.0	0.0	0.0	0.0	0.0	1.0	0.0	0.0	0.0	0.0	0.0	0.0	0.0	0.0
FDFT1	2222	symbol	H. sapiens	2222	H. sapiens	FDFT1	farnesyl-diphosphate farnesyltransferase 1	GO:0045540 regulation of cholesterol biosynthetic process;GO:0006696 ergosterol biosynthetic process;GO:0045338 farnesyl diphosphate metabolic process		Enzymes/ENZYME proteins/Transferases	Endoplasmic reticulum(Supported)	TAK-475 (Squalene synthase activity)		(M5892)HALLMARK CHOLESTEROL HOMEOSTASIS; (M5907)HALLMARK ESTROGEN RESPONSE LATE; (M5906)HALLMARK ESTROGEN RESPONSE EARLY	0.0	0.0	0.0	0.0	0.0	0.0	0.0	0.0	0.0	0.0	0.0	0.0	0.0	0.0	0.0	0.0	0.0	0.0	0.0	0.0
ZNF398	57541	symbol	H. sapiens	57541	H. sapiens	ZNF398	zinc finger protein 398	GO:0045893 positive regulation of transcription, DNA-templated;GO:1903508 positive regulation of nucleic acid-templated transcription;GO:1902680 positive regulation of RNA biosynthetic process		Transcription factors/Zinc-coordinating DNA-binding domains	Mitochondria;Nucleoplasm(Approved)				0.0	0.0	0.0	0.0	0.0	0.0	0.0	0.0	0.0	0.0	0.0	0.0	0.0	0.0	0.0	0.0	0.0	0.0	0.0	0.0
BRD3	8019	symbol	H. sapiens	8019	H. sapiens	BRD3	bromodomain containing 3	GO:0016569 covalent chromatin modification;GO:0006325 chromatin organization;GO:0006357 regulation of transcription by RNA polymerase II			Nuclear bodies(Approved)				0.0	0.0	0.0	0.0	0.0	0.0	0.0	1.0	0.0	0.0	0.0	0.0	0.0	0.0	0.0	0.0	0.0	0.0	0.0	0.0
SEC24D	9871	symbol	H. sapiens	9871	H. sapiens	SEC24D	SEC24 homolog D, COPII coat complex component	GO:0048208 COPII vesicle coating;GO:0090110 cargo loading into COPII-coated vesicle;GO:0048207 vesicle targeting, rough ER to cis-Golgi			Vesicles(Approved)			(M5910)HALLMARK PROTEIN SECRETION; (M5908)HALLMARK ANDROGEN RESPONSE	0.0	0.0	1.0	0.0	0.0	0.0	0.0	0.0	0.0	0.0	0.0	0.0	0.0	0.0	0.0	0.0	0.0	0.0	0.0	0.0
ARRDC4	91947	symbol	H. sapiens	91947	H. sapiens	ARRDC4	arrestin domain containing 4	GO:0051443 positive regulation of ubiquitin-protein transferase activity;GO:0051438 regulation of ubiquitin-protein transferase activity;GO:0031398 positive regulation of protein ubiquitination							0.0	0.0	1.0	0.0	0.0	0.0	0.0	0.0	0.0	0.0	0.0	0.0	0.0	0.0	0.0	0.0	0.0	0.0	0.0	0.0
BTN3A3	10384	symbol	H. sapiens	10384	H. sapiens	BTN3A3	butyrophilin subfamily 3 member A3	GO:0002456 T cell mediated immunity;GO:0002449 lymphocyte mediated immunity;GO:0002460 adaptive immune response based on somatic recombination of immune receptors built from immunoglobulin superfamily domains							0.0	0.0	1.0	0.0	0.0	0.0	0.0	0.0	0.0	0.0	0.0	0.0	0.0	0.0	0.0	0.0	0.0	0.0	0.0	1.0
RGS3	5998	symbol	H. sapiens	5998	H. sapiens	RGS3	regulator of G protein signaling 3	GO:0000188 inactivation of MAPK activity;GO:0043407 negative regulation of MAP kinase activity;GO:0071901 negative regulation of protein serine/threonine kinase activity			Cytosol;Nucleoplasm(Enhanced)Mitochondria(Approved)		(M257)PID EPHRINB REV PATHWAY		0.0	0.0	0.0	0.0	0.0	0.0	0.0	0.0	1.0	0.0	0.0	0.0	0.0	0.0	0.0	0.0	0.0	0.0	0.0	0.0
LOC101060389	101060389	Gene_ID	H. sapiens	101060389	H. sapiens	TBC1D3D	TBC1 domain family member 3D	GO:0031338 regulation of vesicle fusion;GO:0090630 activation of GTPase activity;GO:0006906 vesicle fusion			Vesicles(Uncertain)				0.0	0.0	0.0	0.0	0.0	0.0	0.0	0.0	1.0	0.0	0.0	0.0	0.0	0.0	0.0	0.0	0.0	0.0	0.0	0.0
Mar-01						None	None	None	None	None	None	None	None	None	nan	nan	nan	nan	nan	nan	nan	nan	nan	nan	nan	nan	nan	nan	nan	nan	nan	nan	nan	nan
NFE2L1	4779	symbol	H. sapiens	4779	H. sapiens	NFE2L1	nuclear factor, erythroid 2 like 1	GO:0006783 heme biosynthetic process;GO:0042168 heme metabolic process;GO:0006779 porphyrin-containing compound biosynthetic process		Transcription factors/Basic domains	Cytosol;Nucleus(Approved)	Lauryl Dimethylamine-N-Oxide (Transcriptional activator activity, rna polymerase ii transcription factor binding)		(M5945)HALLMARK HEME METABOLISM	0.0	0.0	0.0	1.0	0.0	0.0	0.0	0.0	0.0	0.0	0.0	0.0	0.0	0.0	1.0	0.0	0.0	0.0	0.0	0.0
MCMBP	79892	symbol	H. sapiens	79892	H. sapiens	MCMBP	minichromosome maintenance complex binding protein	GO:0007062 sister chromatid cohesion;GO:0006261 DNA-dependent DNA replication;GO:0000819 sister chromatid segregation			Nucleoplasm(Enhanced)				0.0	0.0	0.0	0.0	0.0	0.0	0.0	0.0	0.0	0.0	0.0	0.0	0.0	0.0	0.0	0.0	0.0	0.0	0.0	0.0
ABCC5	10057	symbol	H. sapiens	10057	H. sapiens	ABCC5	ATP binding cassette subfamily C member 5	GO:0030213 hyaluronan biosynthetic process;GO:0099133 ATP hydrolysis coupled anion transmembrane transport;GO:0030212 hyaluronan metabolic process		Transporters/Primary Active Transporters	Plasma membrane(Supported)Cell Junctions;Nucleus(Approved)			(M5949)HALLMARK PEROXISOME; (M5939)HALLMARK P53 PATHWAY	0.0	0.0	0.0	0.0	0.0	0.0	0.0	0.0	0.0	0.0	0.0	0.0	0.0	0.0	0.0	0.0	0.0	0.0	0.0	0.0
NT5C3A	51251	symbol	H. sapiens	51251	H. sapiens	NT5C3A	5'-nucleotidase, cytosolic IIIA	GO:0046135 pyrimidine nucleoside catabolic process;GO:0046085 adenosine metabolic process;GO:0009164 nucleoside catabolic process		Enzymes/ENZYME proteins/Hydrolases				(M5898)HALLMARK DNA REPAIR	0.0	0.0	0.0	0.0	0.0	0.0	0.0	0.0	0.0	0.0	0.0	0.0	0.0	0.0	0.0	0.0	0.0	0.0	0.0	0.0
FCGR2B	2213	symbol	H. sapiens	2213	H. sapiens	FCGR2B	Fc fragment of IgG receptor IIb	GO:0001814 negative regulation of antibody-dependent cellular cytotoxicity;GO:0001797 negative regulation of type IIa hypersensitivity;GO:0001813 regulation of antibody-dependent cellular cytotoxicity		CD markers		Cetuximab;Cetuximab (Transmembrane signaling receptor activity);Etanercept;Etanercept (Transmembrane signaling receptor activity);Immune Globulin Human;Immune Globulin Human (Transmembrane signaling receptor activity);Adalimumab;Adalimumab (Transmembrane signaling receptor activity);Abciximab;Abciximab (Transmembrane signaling receptor activity);Gemtuzumab ozogamicin;Gemtuzumab ozogamicin (Transm…	(M7)PID FCER1 PATHWAY; (M10)PID BCR 5PATHWAY	(M5950)HALLMARK ALLOGRAFT REJECTION	1.0	1.0	1.0	1.0	1.0	1.0	1.0	0.0	1.0	0.0	0.0	0.0	0.0	0.0	0.0	1.0	1.0	0.0	0.0	1.0
PPIB	5479	symbol	H. sapiens	5479	H. sapiens	PPIB	peptidylprolyl isomerase B	GO:0044829 positive regulation by host of viral genome replication;GO:0044827 modulation by host of viral genome replication;GO:0044794 positive regulation by host of viral process		Enzymes/ENZYME proteins/Isomerase	Endoplasmic reticulum(Supported)Nucleus(Approved)	L-Proline (Unfolded protein binding);1,4-Dithiothreitol (Unfolded protein binding)	(M198)PID SYNDECAN 1 PATHWAY	(M5930)HALLMARK EPITHELIAL MESENCHYMAL TRANSITION	0.0	0.0	0.0	0.0	0.0	0.0	0.0	0.0	0.0	0.0	0.0	0.0	0.0	0.0	0.0	0.0	1.0	0.0	0.0	0.0
AOC1	26	symbol	H. sapiens	26	H. sapiens	AOC1	amine oxidase, copper containing 1	GO:0035874 cellular response to copper ion starvation;GO:0097185 cellular response to azide;GO:0071504 cellular response to heparin		Enzymes/ENZYME proteins/Oxidoreductases		Amiloride (Zinc ion binding);Diminazene (Zinc ion binding)			1.0	0.0	0.0	0.0	0.0	0.0	0.0	0.0	0.0	0.0	0.0	0.0	0.0	0.0	0.0	0.0	0.0	0.0	0.0	0.0
TMEM260	54916	symbol	H. sapiens	54916	H. sapiens	TMEM260	transmembrane protein 260				Cytosol;Focal adhesion sites;Nucleus(Approved)				0.0	0.0	0.0	0.0	0.0	0.0	0.0	0.0	0.0	0.0	0.0	0.0	0.0	0.0	0.0	0.0	0.0	0.0	0.0	0.0
TMED8	283578	symbol	H. sapiens	283578	H. sapiens	TMED8	transmembrane p24 trafficking protein family member 8								0.0	0.0	0.0	0.0	0.0	0.0	0.0	0.0	0.0	0.0	0.0	0.0	0.0	0.0	0.0	0.0	0.0	0.0	0.0	0.0
SLC26A8	116369	symbol	H. sapiens	116369	H. sapiens	SLC26A8	solute carrier family 26 member 8	GO:0048240 sperm capacitation;GO:0019532 oxalate transport;GO:1902358 sulfate transmembrane transport		Transporters/Electrochemical Potential-driven transporters					0.0	0.0	0.0	0.0	0.0	0.0	0.0	0.0	0.0	0.0	0.0	0.0	0.0	0.0	0.0	0.0	0.0	0.0	0.0	0.0
SAP30L	79685	symbol	H. sapiens	79685	H. sapiens	SAP30L	SAP30 like	GO:0016575 histone deacetylation;GO:0006476 protein deacetylation;GO:0035601 protein deacylation			Nucleoli;Nucleus(Enhanced)				0.0	0.0	0.0	0.0	0.0	0.0	0.0	1.0	0.0	0.0	0.0	0.0	0.0	0.0	0.0	0.0	0.0	0.0	0.0	0.0
SLC37A3	84255	symbol	H. sapiens	84255	H. sapiens	SLC37A3	solute carrier family 37 member 3	GO:0015760 glucose-6-phosphate transport;GO:0015712 hexose phosphate transport;GO:0035435 phosphate ion transmembrane transport		Transporters/Electrochemical Potential-driven transporters	Cytosol(Supported)				0.0	0.0	0.0	0.0	0.0	0.0	0.0	0.0	0.0	0.0	0.0	0.0	0.0	0.0	0.0	0.0	0.0	0.0	0.0	0.0
CBWD5	220869	symbol	H. sapiens	220869	H. sapiens	CBWD5	COBW domain containing 5				Plasma membrane(Approved)				0.0	0.0	0.0	0.0	0.0	0.0	0.0	0.0	0.0	0.0	0.0	0.0	0.0	0.0	0.0	0.0	0.0	0.0	0.0	0.0
PCTP	58488	symbol	H. sapiens	58488	H. sapiens	PCTP	phosphatidylcholine transfer protein	GO:0006656 phosphatidylcholine biosynthetic process;GO:0046470 phosphatidylcholine metabolic process;GO:0015914 phospholipid transport			Nucleoli;Nucleus(Approved)	Palmitoyl-Linoleoyl Phosphatidylcholine (Phosphatidylcholine transporter activity);Di-Linoleoyl-3-Sn-Phosphatidylcholine (Phosphatidylcholine transporter activity)			0.0	0.0	0.0	0.0	0.0	0.0	0.0	0.0	0.0	0.0	0.0	0.0	0.0	0.0	0.0	0.0	0.0	0.0	0.0	0.0
IWS1	55677	symbol	H. sapiens	55677	H. sapiens	IWS1	IWS1, SUPT6H interacting protein	GO:2001253 regulation of histone H3-K36 trimethylation;GO:0010793 regulation of mRNA export from nucleus;GO:0097198 histone H3-K36 trimethylation			Nucleoplasm(Enhanced)				0.0	0.0	0.0	0.0	0.0	0.0	0.0	1.0	0.0	0.0	0.0	0.0	0.0	0.0	0.0	0.0	0.0	0.0	0.0	0.0
PRKAG1	5571	symbol	H. sapiens	5571	H. sapiens	PRKAG1	protein kinase AMP-activated non-catalytic subunit gamma 1	GO:0006110 regulation of glycolytic process;GO:2001169 regulation of ATP biosynthetic process;GO:0006096 glycolytic process			Cytosol;Nuclear bodies;Nucleoplasm(Approved)		(M87)PID LKB1 PATHWAY; (M237)PID VEGFR1 2 PATHWAY	(M5923)HALLMARK PI3K AKT MTOR SIGNALING	0.0	0.0	0.0	0.0	0.0	0.0	0.0	0.0	0.0	0.0	0.0	0.0	1.0	0.0	0.0	0.0	0.0	0.0	0.0	0.0
DUSP22	56940	symbol	H. sapiens	56940	H. sapiens	DUSP22	dual specificity phosphatase 22	GO:0050860 negative regulation of T cell receptor signaling pathway;GO:0000188 inactivation of MAPK activity;GO:0050858 negative regulation of antigen receptor-mediated signaling pathway		Enzymes/ENZYME proteins/Hydrolases	Nucleoplasm;Vesicles(Approved)				0.0	1.0	0.0	0.0	1.0	0.0	1.0	0.0	0.0	0.0	0.0	0.0	0.0	0.0	0.0	0.0	0.0	0.0	0.0	1.0
RALGPS2	55103	symbol	H. sapiens	55103	H. sapiens	RALGPS2	Ral GEF with PH domain and SH3 binding motif 2	GO:0032485 regulation of Ral protein signal transduction;GO:0032484 Ral protein signal transduction;GO:0046578 regulation of Ras protein signal transduction			Cytosol;Nucleoplasm(Uncertain)				0.0	0.0	0.0	0.0	0.0	0.0	0.0	0.0	0.0	0.0	0.0	0.0	0.0	0.0	0.0	0.0	0.0	0.0	0.0	0.0
POLR2C	5432	symbol	H. sapiens	5432	H. sapiens	POLR2C	RNA polymerase II subunit C	GO:0050434 positive regulation of viral transcription;GO:0046782 regulation of viral transcription;GO:0006370 7-methylguanosine mRNA capping		RNA polymerase related proteins	Cytosol;Microtubules;Nucleoplasm(Supported)			(M5898)HALLMARK DNA REPAIR	0.0	0.0	0.0	0.0	0.0	0.0	0.0	0.0	0.0	0.0	0.0	0.0	0.0	0.0	0.0	0.0	1.0	0.0	0.0	0.0
ERAP2	64167	symbol	H. sapiens	64167	H. sapiens	ERAP2	endoplasmic reticulum aminopeptidase 2	GO:0019885 antigen processing and presentation of endogenous peptide antigen via MHC class I;GO:0002483 antigen processing and presentation of endogenous peptide antigen;GO:0019883 antigen processing and presentation of endogenous antigen		Enzymes/Peptidases/Metallopeptidases	Golgi apparatus(Approved)			(M5921)HALLMARK COMPLEMENT	0.0	0.0	1.0	0.0	0.0	0.0	0.0	0.0	0.0	0.0	0.0	0.0	0.0	0.0	0.0	0.0	0.0	0.0	0.0	1.0
CLP1	10978	symbol	H. sapiens	10978	H. sapiens	CLP1	cleavage and polyadenylation factor I subunit 1	GO:0035087 siRNA loading onto RISC involved in RNA interference;GO:0030423 targeting of mRNA for destruction involved in RNA interference;GO:0070922 small RNA loading onto RISC		Enzymes/ENZYME proteins/Transferases	Nucleoplasm(Supported)			(M5898)HALLMARK DNA REPAIR	0.0	0.0	0.0	0.0	0.0	0.0	0.0	0.0	0.0	0.0	0.0	0.0	0.0	0.0	0.0	0.0	0.0	0.0	0.0	0.0
KCTD12	115207	symbol	H. sapiens	115207	H. sapiens	KCTD12	potassium channel tetramerization domain containing 12	GO:0051260 protein homooligomerization;GO:0051259 protein complex oligomerization;GO:0065003 protein-containing complex assembly			Mitochondria(Approved)				0.0	0.0	0.0	0.0	0.0	0.0	0.0	0.0	0.0	0.0	0.0	0.0	0.0	0.0	0.0	0.0	0.0	1.0	0.0	0.0
PGLYRP1	8993	symbol	H. sapiens	8993	H. sapiens	PGLYRP1	peptidoglycan recognition protein 1	GO:0032827 negative regulation of natural killer cell differentiation involved in immune response;GO:0051714 positive regulation of cytolysis in other organism;GO:0032824 negative regulation of natural killer cell differentiation						(M5944)HALLMARK ANGIOGENESIS	1.0	1.0	0.0	1.0	1.0	0.0	1.0	0.0	0.0	0.0	0.0	0.0	0.0	1.0	0.0	1.0	0.0	0.0	0.0	1.0
DDX23	9416	symbol	H. sapiens	9416	H. sapiens	DDX23	DEAD-box helicase 23	GO:0000354 cis assembly of pre-catalytic spliceosome;GO:0045292 mRNA cis splicing, via spliceosome;GO:0000245 spliceosomal complex assembly		Enzymes/ENZYME proteins/Hydrolases	Nucleoli;Nucleus(Supported)				0.0	0.0	0.0	0.0	0.0	0.0	0.0	0.0	0.0	0.0	0.0	0.0	0.0	0.0	0.0	0.0	0.0	0.0	0.0	0.0
ELOVL1	64834	symbol	H. sapiens	64834	H. sapiens	ELOVL1	ELOVL fatty acid elongase 1	GO:0034625 fatty acid elongation, monounsaturated fatty acid;GO:0034626 fatty acid elongation, polyunsaturated fatty acid;GO:0036109 alpha-linolenic acid metabolic process		Enzymes/ENZYME proteins/Transferases	Endoplasmic reticulum(Approved)				0.0	0.0	0.0	0.0	0.0	0.0	0.0	0.0	0.0	0.0	0.0	0.0	0.0	0.0	0.0	0.0	0.0	0.0	0.0	0.0
RNASEL	6041	symbol	H. sapiens	6041	H. sapiens	RNASEL	ribonuclease L	GO:2001275 positive regulation of glucose import in response to insulin stimulus;GO:2001273 regulation of glucose import in response to insulin stimulus;GO:0046326 positive regulation of glucose import	Other	Enzymes/Kinases	Cytosol(Supported)			(M5902)HALLMARK APOPTOSIS	0.0	0.0	0.0	1.0	0.0	0.0	0.0	0.0	0.0	1.0	0.0	0.0	0.0	0.0	0.0	0.0	1.0	0.0	0.0	0.0
SLC12A4	6560	symbol	H. sapiens	6560	H. sapiens	SLC12A4	solute carrier family 12 member 4	GO:0006884 cell volume homeostasis;GO:1902476 chloride transmembrane transport;GO:0071805 potassium ion transmembrane transport		Transporters/Electrochemical Potential-driven transporters	Endosomes(Approved)	Potassium Chloride (Protein kinase binding);Bumetanide (Protein kinase binding)		(M5934)HALLMARK XENOBIOTIC METABOLISM	0.0	0.0	0.0	0.0	0.0	0.0	0.0	0.0	0.0	0.0	0.0	0.0	0.0	0.0	0.0	0.0	0.0	0.0	0.0	0.0
PHF13	148479	symbol	H. sapiens	148479	H. sapiens	PHF13	PHD finger protein 13	GO:0007076 mitotic chromosome condensation;GO:0030261 chromosome condensation;GO:0000070 mitotic sister chromatid segregation							0.0	0.0	0.0	0.0	0.0	0.0	0.0	1.0	0.0	0.0	0.0	0.0	0.0	0.0	0.0	0.0	0.0	0.0	0.0	0.0
YTHDF1	54915	symbol	H. sapiens	54915	H. sapiens	YTHDF1	YTH N6-methyladenosine RNA binding protein 1	GO:0045948 positive regulation of translational initiation;GO:0006446 regulation of translational initiation;GO:0045727 positive regulation of translation							0.0	0.0	0.0	0.0	0.0	0.0	0.0	0.0	0.0	0.0	0.0	0.0	0.0	0.0	0.0	0.0	0.0	0.0	0.0	0.0
HLA-G	3135	symbol	H. sapiens	3135	H. sapiens	HLA-G	major histocompatibility complex, class I, G	GO:0045591 positive regulation of regulatory T cell differentiation;GO:2001199 negative regulation of dendritic cell differentiation;GO:0002480 antigen processing and presentation of exogenous peptide antigen via MHC class I, TAP-independent						(M5950)HALLMARK ALLOGRAFT REJECTION; (M5913)HALLMARK INTERFERON GAMMA RESPONSE	0.0	1.0	1.0	1.0	1.0	1.0	1.0	0.0	0.0	1.0	0.0	0.0	0.0	0.0	0.0	0.0	0.0	0.0	0.0	1.0
NEK6	10783	symbol	H. sapiens	10783	H. sapiens	NEK6	NIMA related kinase 6	GO:0007077 mitotic nuclear envelope disassembly;GO:0030071 regulation of mitotic metaphase/anaphase transition;GO:0007091 metaphase/anaphase transition of mitotic cell cycle	NEK Ser/Thr protein kinase family	Enzymes/{ENZYME proteins/Transferases,Kinases/NEK Ser/Thr protein kinases};Transporters/Transporter channels and pores	Cytosol;Microtubule organizing center;Nucleoplasm(Supported)				0.0	0.0	0.0	0.0	0.0	0.0	0.0	0.0	0.0	0.0	0.0	0.0	1.0	0.0	0.0	0.0	0.0	0.0	0.0	0.0
PCMTD2	55251	symbol	H. sapiens	55251	H. sapiens	PCMTD2	protein-L-isoaspartate (D-aspartate) O-methyltransferase domain containing 2	GO:0006479 protein methylation;GO:0008213 protein alkylation;GO:0043414 macromolecule methylation			Mitochondria;Nucleoplasm(Approved)				0.0	0.0	0.0	0.0	0.0	0.0	0.0	0.0	0.0	0.0	0.0	0.0	0.0	0.0	0.0	0.0	0.0	0.0	0.0	0.0
CTR9	9646	symbol	H. sapiens	9646	H. sapiens	CTR9	CTR9 homolog, Paf1/RNA polymerase II complex component	GO:2001162 positive regulation of histone H3-K79 methylation;GO:2001168 positive regulation of histone H2B ubiquitination;GO:2001160 regulation of histone H3-K79 methylation			Nucleoplasm(Enhanced)				0.0	1.0	1.0	0.0	1.0	0.0	0.0	1.0	0.0	1.0	0.0	0.0	0.0	0.0	1.0	0.0	0.0	0.0	0.0	0.0
OR52K2	119774	symbol	H. sapiens	119774	H. sapiens	OR52K2	olfactory receptor family 52 subfamily K member 2	GO:0050911 detection of chemical stimulus involved in sensory perception of smell;GO:0050907 detection of chemical stimulus involved in sensory perception;GO:0007608 sensory perception of smell		G-protein coupled receptors/Odorant/olfactory and gustatory receptors					0.0	0.0	0.0	0.0	0.0	0.0	0.0	0.0	0.0	0.0	0.0	0.0	0.0	0.0	0.0	0.0	0.0	0.0	0.0	0.0
SLC39A7	7922	symbol	H. sapiens	7922	H. sapiens	SLC39A7	solute carrier family 39 member 7	GO:0006882 cellular zinc ion homeostasis;GO:0071577 zinc II ion transmembrane transport;GO:0055069 zinc ion homeostasis		Transporters/Electrochemical Potential-driven transporters	Endoplasmic reticulum(Supported)				0.0	0.0	0.0	0.0	0.0	0.0	0.0	0.0	0.0	0.0	0.0	0.0	0.0	0.0	0.0	0.0	0.0	0.0	0.0	0.0
ZDHHC12	84885	symbol	H. sapiens	84885	H. sapiens	ZDHHC12	zinc finger DHHC-type containing 12	GO:0018345 protein palmitoylation;GO:0006497 protein lipidation;GO:0042158 lipoprotein biosynthetic process		Enzymes/ENZYME proteins/Transferases	Nucleoplasm(Approved)				0.0	0.0	0.0	0.0	0.0	0.0	0.0	1.0	0.0	0.0	0.0	0.0	0.0	0.0	0.0	0.0	0.0	0.0	0.0	0.0
PGM1	5236	symbol	H. sapiens	5236	H. sapiens	PGM1	phosphoglucomutase 1	GO:0019388 galactose catabolic process;GO:0005980 glycogen catabolic process;GO:0006096 glycolytic process		Enzymes/ENZYME proteins/Isomerase	Actin filaments(Enhanced)	Alpha-D-Glucose 1,6-Bisphosphate (Phosphoglucomutase activity);Alpha-D-Glucose-1-Phosphate-6-Vanadate (Phosphoglucomutase activity)	(M255)PID HIF1 TFPATHWAY	(M5905)HALLMARK ADIPOGENESIS; (M5891)HALLMARK HYPOXIA; (M5924)HALLMARK MTORC1 SIGNALING	1.0	0.0	0.0	0.0	0.0	0.0	0.0	0.0	0.0	0.0	0.0	0.0	0.0	0.0	0.0	0.0	0.0	0.0	0.0	0.0
RAB3A	5864	symbol	H. sapiens	5864	H. sapiens	RAB3A	RAB3A, member RAS oncogene family	GO:0031630 regulation of synaptic vesicle fusion to presynaptic active zone membrane;GO:0061670 evoked neurotransmitter secretion;GO:0048172 regulation of short-term neuronal synaptic plasticity			Centrosome;Cytosol;Nucleoplasm(Approved)				1.0	0.0	0.0	0.0	0.0	0.0	0.0	0.0	1.0	0.0	0.0	0.0	0.0	0.0	0.0	0.0	0.0	0.0	0.0	0.0
CYSLTR1	10800	symbol	H. sapiens	10800	H. sapiens	CYSLTR1	cysteinyl leukotriene receptor 1	GO:0061737 leukotriene signaling pathway;GO:0007204 positive regulation of cytosolic calcium ion concentration;GO:0051480 regulation of cytosolic calcium ion concentration		G-protein coupled receptors/GPCRs excl olfactory receptors;Transporters		Montelukast (Leukotriene receptor activity);Zafirlukast (Leukotriene receptor activity);Cinalukast (Leukotriene receptor activity);Nedocromil (Leukotriene receptor activity);Pranlukast (Leukotriene receptor activity)	(M8)PID ENDOTHELIN PATHWAY		0.0	0.0	0.0	1.0	0.0	0.0	0.0	0.0	0.0	0.0	0.0	0.0	0.0	0.0	0.0	0.0	0.0	0.0	0.0	0.0
AVIL	10677	symbol	H. sapiens	10677	H. sapiens	AVIL	advillin	GO:0051693 actin filament capping;GO:0030835 negative regulation of actin filament depolymerization;GO:0030837 negative regulation of actin filament polymerization							0.0	0.0	0.0	0.0	0.0	0.0	0.0	0.0	0.0	0.0	0.0	0.0	0.0	0.0	0.0	0.0	0.0	0.0	0.0	0.0
CPNE3	8895	symbol	H. sapiens	8895	H. sapiens	CPNE3	copine 3	GO:0038128 ERBB2 signaling pathway;GO:0043312 neutrophil degranulation;GO:0071277 cellular response to calcium ion			Cytosol;Nucleoli;Nucleus(Supported)Mitochondria(Approved)				1.0	0.0	0.0	0.0	0.0	0.0	0.0	0.0	0.0	0.0	0.0	0.0	0.0	0.0	0.0	0.0	0.0	0.0	0.0	0.0
DNAJC25	548645	symbol	H. sapiens	548645	H. sapiens	DNAJC25	DnaJ heat shock protein family (Hsp40) member C25				Cytosol;Nucleoplasm(Approved)				0.0	0.0	0.0	0.0	0.0	0.0	0.0	0.0	0.0	0.0	0.0	0.0	0.0	0.0	0.0	0.0	0.0	0.0	0.0	0.0
RPS6KB2	6199	symbol	H. sapiens	6199	H. sapiens	RPS6KB2	ribosomal protein S6 kinase B2	GO:0045948 positive regulation of translational initiation;GO:0006446 regulation of translational initiation;GO:0045727 positive regulation of translation	AGC Ser/Thr protein kinase family	Enzymes/{ENZYME proteins/Transferases,Kinases/AGC Ser/Thr protein kinases}	Cytosol(Supported)				0.0	0.0	0.0	0.0	0.0	0.0	0.0	0.0	0.0	0.0	0.0	0.0	0.0	0.0	0.0	0.0	0.0	0.0	0.0	0.0
TRAPPC12	51112	symbol	H. sapiens	51112	H. sapiens	TRAPPC12	trafficking protein particle complex 12	GO:1905342 positive regulation of protein localization to kinetochore;GO:0090234 regulation of kinetochore assembly;GO:1905340 regulation of protein localization to kinetochore							0.0	0.0	0.0	0.0	0.0	0.0	0.0	0.0	0.0	0.0	0.0	0.0	0.0	0.0	0.0	0.0	0.0	1.0	0.0	0.0
SPRYD3	84926	symbol	H. sapiens	84926	H. sapiens	SPRYD3	SPRY domain containing 3				Actin filaments;Cytosol;Nucleoplasm(Approved)				0.0	0.0	0.0	0.0	0.0	0.0	0.0	0.0	0.0	0.0	0.0	0.0	0.0	0.0	0.0	0.0	0.0	0.0	0.0	0.0
MTMR1	8776	symbol	H. sapiens	8776	H. sapiens	MTMR1	myotubularin related protein 1	GO:0060304 regulation of phosphatidylinositol dephosphorylation;GO:0046856 phosphatidylinositol dephosphorylation;GO:0006661 phosphatidylinositol biosynthetic process		Enzymes/ENZYME proteins/Hydrolases	Microtubule organizing center(Approved)				0.0	0.0	0.0	0.0	0.0	0.0	0.0	0.0	0.0	0.0	0.0	0.0	0.0	0.0	0.0	0.0	0.0	0.0	0.0	0.0
PHB2	11331	symbol	H. sapiens	11331	H. sapiens	PHB2	prohibitin 2	GO:0033600 negative regulation of mammary gland epithelial cell proliferation;GO:0060744 mammary gland branching involved in thelarche;GO:0060762 regulation of branching involved in mammary gland duct morphogenesis			Mitochondria(Enhanced)		(M200)PID ERA GENOMIC PATHWAY	(M5926)HALLMARK MYC TARGETS V1; (M5936)HALLMARK OXIDATIVE PHOSPHORYLATION	0.0	0.0	0.0	1.0	0.0	0.0	1.0	0.0	0.0	0.0	0.0	0.0	0.0	0.0	0.0	0.0	0.0	0.0	0.0	1.0
ZNF254	9534	symbol	H. sapiens	9534	H. sapiens	ZNF254	zinc finger protein 254	GO:0000122 negative regulation of transcription by RNA polymerase II;GO:0045892 negative regulation of transcription, DNA-templated;GO:1903507 negative regulation of nucleic acid-templated transcription		Transcription factors/Zinc-coordinating DNA-binding domains					0.0	0.0	0.0	0.0	0.0	0.0	0.0	0.0	0.0	0.0	0.0	0.0	0.0	0.0	0.0	0.0	0.0	0.0	0.0	0.0
CYB561D1	284613	symbol	H. sapiens	284613	H. sapiens	CYB561D1	cytochrome b561 family member D1	GO:0055114 oxidation-reduction process;GO:0008152 metabolic process;GO:0008150 biological_process							0.0	0.0	0.0	0.0	0.0	0.0	0.0	0.0	0.0	0.0	0.0	0.0	0.0	0.0	0.0	0.0	0.0	0.0	0.0	0.0
TLK1	9874	symbol	H. sapiens	9874	H. sapiens	TLK1	tousled like kinase 1	GO:0001672 regulation of chromatin assembly or disassembly;GO:1902275 regulation of chromatin organization;GO:0006333 chromatin assembly or disassembly	Other	Enzymes/{ENZYME proteins/Transferases,Kinases}	Nucleus(Enhanced)			(M5893)HALLMARK MITOTIC SPINDLE	0.0	0.0	0.0	0.0	0.0	0.0	0.0	1.0	0.0	0.0	0.0	0.0	0.0	0.0	0.0	0.0	0.0	0.0	0.0	0.0
KCTD21	283219	symbol	H. sapiens	283219	H. sapiens	KCTD21	potassium channel tetramerization domain containing 21	GO:0045879 negative regulation of smoothened signaling pathway;GO:0008589 regulation of smoothened signaling pathway;GO:0007224 smoothened signaling pathway			Cytosol(Approved)				0.0	0.0	1.0	0.0	0.0	0.0	0.0	0.0	0.0	0.0	0.0	0.0	0.0	0.0	0.0	0.0	0.0	1.0	0.0	0.0
ERI1	90459	symbol	H. sapiens	90459	H. sapiens	ERI1	exoribonuclease 1	GO:0071044 histone mRNA catabolic process;GO:0031125 rRNA 3'-end processing;GO:0008334 histone mRNA metabolic process			Microtubules;Vesicles(Approved)				0.0	0.0	0.0	0.0	0.0	0.0	0.0	0.0	0.0	0.0	0.0	0.0	0.0	0.0	0.0	0.0	0.0	0.0	0.0	0.0
HADHA	3030	symbol	H. sapiens	3030	H. sapiens	HADHA	hydroxyacyl-CoA dehydrogenase trifunctional multienzyme complex subunit alpha	GO:0035965 cardiolipin acyl-chain remodeling;GO:0032048 cardiolipin metabolic process;GO:0006635 fatty acid beta-oxidation		Enzymes/ENZYME proteins/{Lyases,Oxidoreductases}	Mitochondria(Enhanced)	NADH (Nad binding)		(M5936)HALLMARK OXIDATIVE PHOSPHORYLATION	0.0	0.0	0.0	0.0	0.0	0.0	0.0	0.0	0.0	0.0	0.0	0.0	0.0	0.0	0.0	0.0	0.0	0.0	0.0	0.0
LNPEP	4012	symbol	H. sapiens	4012	H. sapiens	LNPEP	leucyl and cystinyl aminopeptidase	GO:0002480 antigen processing and presentation of exogenous peptide antigen via MHC class I, TAP-independent;GO:0042590 antigen processing and presentation of exogenous peptide antigen via MHC class I;GO:0002474 antigen processing and presentation of peptide antigen via MHC class I		Enzymes/{ENZYME proteins/Hydrolases,Peptidases/Metallopeptidases}			(M247)PID INSULIN GLUCOSE PATHWAY; (M7955)SIG INSULIN RECEPTOR PATHWAY IN CARDIAC MYOCYTES		0.0	0.0	1.0	0.0	0.0	0.0	0.0	0.0	0.0	0.0	0.0	0.0	0.0	0.0	0.0	0.0	0.0	0.0	0.0	0.0
ATP7A	538	symbol	H. sapiens	538	H. sapiens	ATP7A	ATPase copper transporting alpha	GO:0021702 cerebellar Purkinje cell differentiation;GO:0034760 negative regulation of iron ion transmembrane transport;GO:0021694 cerebellar Purkinje cell layer formation		Enzymes/ENZYME proteins/Hydrolases;Transporters/Primary Active Transporters	Golgi apparatus;Vesicles(Supported)			(M5910)HALLMARK PROTEIN SECRETION; (M5891)HALLMARK HYPOXIA	1.0	1.0	0.0	0.0	0.0	0.0	0.0	1.0	0.0	0.0	0.0	0.0	1.0	0.0	0.0	1.0	0.0	0.0	0.0	0.0
ZNF200	7752	symbol	H. sapiens	7752	H. sapiens	ZNF200	zinc finger protein 200	GO:0006355 regulation of transcription, DNA-templated;GO:1903506 regulation of nucleic acid-templated transcription;GO:0006351 transcription, DNA-templated		Transcription factors/Zinc-coordinating DNA-binding domains	Mitochondria(Approved)				0.0	0.0	0.0	0.0	0.0	0.0	0.0	0.0	0.0	0.0	0.0	0.0	0.0	0.0	0.0	0.0	0.0	0.0	0.0	0.0
INTS8	55656	symbol	H. sapiens	55656	H. sapiens	INTS8	integrator complex subunit 8	GO:0042795 snRNA transcription by RNA polymerase II;GO:0009301 snRNA transcription;GO:0016180 snRNA processing			Nucleoplasm(Approved)				0.0	0.0	0.0	0.0	0.0	0.0	0.0	0.0	0.0	0.0	0.0	0.0	0.0	0.0	0.0	0.0	0.0	0.0	0.0	0.0
DECR1	1666	symbol	H. sapiens	1666	H. sapiens	DECR1	2,4-dienoyl-CoA reductase 1	GO:0006635 fatty acid beta-oxidation;GO:0051289 protein homotetramerization;GO:0009062 fatty acid catabolic process		Enzymes/ENZYME proteins/Oxidoreductases	Mitochondria(Supported)Cytosol(Uncertain)	2'-Monophosphoadenosine 5'-Diphosphoribose (Oxidoreductase activity, acting on nad(p)h);6-METHYL-2(PROPANE-1-SULFONYL)-2H-THIENO[3,2-D][1,2,3]DIAZABORININ-1-OL (Oxidoreductase activity, acting on nad(p)h)		(M5935)HALLMARK FATTY ACID METABOLISM; (M5905)HALLMARK ADIPOGENESIS; (M5936)HALLMARK OXIDATIVE PHOSPHORYLATION	0.0	0.0	0.0	0.0	0.0	0.0	0.0	0.0	0.0	0.0	0.0	0.0	0.0	0.0	0.0	0.0	0.0	1.0	0.0	0.0
ROCK2	9475	symbol	H. sapiens	9475	H. sapiens	ROCK2	Rho associated coiled-coil containing protein kinase 2	GO:1903347 negative regulation of bicellular tight junction assembly;GO:1902966 positive regulation of protein localization to early endosome;GO:0035509 negative regulation of myosin-light-chain-phosphatase activity	AGC Ser/Thr protein kinase family	Enzymes/{ENZYME proteins/Transferases,Kinases/AGC Ser/Thr protein kinases}	Cytosol(Supported)	5-(1,4-DIAZEPAN-1-SULFONYL)ISOQUINOLINE (Structural molecule activity);(R)-TRANS-4-(1-AMINOETHYL)-N-(4-PYRIDYL) CYCLOHEXANECARBOXAMIDE (Structural molecule activity)	(M138)PID THROMBIN PAR4 PATHWAY; (M63)PID AVB3 OPN PATHWAY; (M16801)SIG REGULATION OF THE ACTIN CYTOSKELETON BY RHO GTPASES		0.0	1.0	0.0	0.0	0.0	0.0	0.0	0.0	1.0	0.0	0.0	0.0	1.0	0.0	0.0	0.0	1.0	0.0	0.0	0.0
FAR2	55711	symbol	H. sapiens	55711	H. sapiens	FAR2	fatty acyl-CoA reductase 2	GO:0035336 long-chain fatty-acyl-CoA metabolic process;GO:0010025 wax biosynthetic process;GO:0035337 fatty-acyl-CoA metabolic process		Enzymes/ENZYME proteins/Oxidoreductases	Golgi apparatus;Nucleoli(Approved)				0.0	0.0	0.0	0.0	0.0	0.0	0.0	0.0	0.0	0.0	0.0	0.0	0.0	0.0	0.0	0.0	0.0	0.0	0.0	0.0
ACSS2	55902	symbol	H. sapiens	55902	H. sapiens	ACSS2	acyl-CoA synthetase short chain family member 2	GO:0019542 propionate biosynthetic process;GO:0019427 acetyl-CoA biosynthetic process from acetate;GO:0051790 short-chain fatty acid biosynthetic process		Enzymes/ENZYME proteins/Ligase	Cytosol(Supported)Vesicles(Approved)Nucleoplasm(Uncertain)	Adenosine monophosphate (Atp binding);Adenosine triphosphate (Atp binding)	(M32)PID HDAC CLASSIII PATHWAY	(M5892)HALLMARK CHOLESTEROL HOMEOSTASIS	0.0	0.0	0.0	0.0	0.0	0.0	0.0	0.0	0.0	0.0	0.0	0.0	0.0	0.0	0.0	0.0	0.0	0.0	0.0	0.0
FLJ44635	392490	symbol	H. sapiens	392490	H. sapiens	FLJ44635	TPT1-like protein	GO:0030154 cell differentiation;GO:0048869 cellular developmental process;GO:0032502 developmental process							0.0	0.0	0.0	0.0	0.0	0.0	0.0	0.0	0.0	0.0	0.0	0.0	0.0	0.0	0.0	0.0	0.0	0.0	0.0	0.0
ZMYND8	23613	symbol	H. sapiens	23613	H. sapiens	ZMYND8	zinc finger MYND-type containing 8	GO:1902897 regulation of postsynaptic density protein 95 clustering;GO:1902952 positive regulation of dendritic spine maintenance;GO:1903758 negative regulation of transcription from RNA polymerase II promoter by histone modification			Golgi apparatus;Nucleoplasm(Approved)				0.0	0.0	0.0	0.0	0.0	0.0	0.0	1.0	0.0	0.0	0.0	0.0	0.0	0.0	0.0	0.0	0.0	0.0	0.0	0.0
TM6SF1	53346	symbol	H. sapiens	53346	H. sapiens	TM6SF1	transmembrane 6 superfamily member 1	GO:0008150 biological_process		Transporters					0.0	0.0	0.0	0.0	0.0	0.0	0.0	0.0	0.0	0.0	0.0	0.0	0.0	0.0	0.0	0.0	0.0	0.0	0.0	0.0
EPOR	2057	symbol	H. sapiens	2057	H. sapiens	EPOR	erythropoietin receptor	GO:0038162 erythropoietin-mediated signaling pathway;GO:0036018 cellular response to erythropoietin;GO:0046697 decidualization			Vesicles(Supported)	Darbepoetin alfa (Identical protein binding);Erythropoietin (Identical protein binding);3,5 DIBROMOTYROSINE (Identical protein binding);Peginesatide (Identical protein binding);Epoetin Zeta (Identical protein binding)	(M233)PID EPO PATHWAY; (M231)PID KIT PATHWAY	(M5945)HALLMARK HEME METABOLISM	0.0	0.0	0.0	0.0	0.0	0.0	0.0	0.0	0.0	1.0	0.0	0.0	0.0	0.0	0.0	0.0	0.0	0.0	1.0	0.0
ZNF296	162979	symbol	H. sapiens	162979	H. sapiens	ZNF296	zinc finger protein 296	GO:0007283 spermatogenesis;GO:0000122 negative regulation of transcription by RNA polymerase II;GO:0048232 male gamete generation		Transcription factors/Zinc-coordinating DNA-binding domains	Centrosome;Nucleoplasm(Approved)				0.0	0.0	0.0	0.0	0.0	0.0	0.0	0.0	0.0	0.0	0.0	0.0	0.0	0.0	0.0	0.0	0.0	0.0	0.0	0.0
EXOC6	54536	symbol	H. sapiens	54536	H. sapiens	EXOC6	exocyst complex component 6	GO:0006904 vesicle docking involved in exocytosis;GO:0140029 exocytic process;GO:0048278 vesicle docking		Transporters/Transporter channels and pores	Vesicles(Supported)Nucleoplasm(Approved)		(M16)PID INSULIN PATHWAY; (M67)PID ARF6 TRAFFICKING PATHWAY		0.0	0.0	0.0	0.0	0.0	0.0	0.0	0.0	0.0	0.0	0.0	0.0	0.0	0.0	0.0	0.0	0.0	0.0	0.0	0.0
TOPBP1	11073	symbol	H. sapiens	11073	H. sapiens	TOPBP1	DNA topoisomerase II binding protein 1	GO:0033314 mitotic DNA replication checkpoint;GO:0007095 mitotic G2 DNA damage checkpoint;GO:0044818 mitotic G2/M transition checkpoint			Nucleus(Enhanced)		(M258)PID BARD1 PATHWAY; (M46)PID ATR PATHWAY; (M1)PID FANCONI PATHWAY	(M5951)HALLMARK SPERMATOGENESIS	0.0	0.0	0.0	0.0	0.0	0.0	0.0	0.0	0.0	0.0	0.0	0.0	1.0	0.0	0.0	0.0	0.0	0.0	0.0	0.0
TAF15	8148	symbol	H. sapiens	8148	H. sapiens	TAF15	TATA-box binding protein associated factor 15	GO:0006368 transcription elongation from RNA polymerase II promoter;GO:1901796 regulation of signal transduction by p53 class mediator;GO:0006367 transcription initiation from RNA polymerase II promoter			Nucleoplasm(Enhanced)				0.0	0.0	0.0	0.0	0.0	0.0	0.0	0.0	0.0	0.0	0.0	1.0	0.0	0.0	0.0	0.0	0.0	0.0	0.0	0.0
IGFLR1	79713	symbol	H. sapiens	79713	H. sapiens	IGFLR1	IGF like family receptor 1				Focal adhesion sites(Approved)				0.0	0.0	0.0	0.0	0.0	0.0	0.0	0.0	0.0	0.0	0.0	0.0	0.0	0.0	0.0	0.0	0.0	0.0	0.0	0.0
HAT1	8520	symbol	H. sapiens	8520	H. sapiens	HAT1	histone acetyltransferase 1	GO:0006335 DNA replication-dependent nucleosome assembly;GO:0006348 chromatin silencing at telomere;GO:0006336 DNA replication-independent nucleosome assembly		Enzymes/ENZYME proteins/Transferases	Nucleoplasm(Enhanced)				0.0	0.0	0.0	0.0	0.0	0.0	0.0	1.0	0.0	0.0	0.0	0.0	0.0	0.0	0.0	0.0	0.0	0.0	0.0	0.0
SLCO4C1	353189	symbol	H. sapiens	353189	H. sapiens	SLCO4C1	solute carrier organic anion transporter family member 4C1	GO:0043312 neutrophil degranulation;GO:0002283 neutrophil activation involved in immune response;GO:0043252 sodium-independent organic anion transport		Transporters/Electrochemical Potential-driven transporters					1.0	0.0	0.0	0.0	0.0	0.0	0.0	0.0	0.0	0.0	0.0	0.0	0.0	0.0	0.0	0.0	0.0	0.0	0.0	0.0
HHEX	3087	symbol	H. sapiens	3087	H. sapiens	HHEX	hematopoietically expressed homeobox	GO:0060431 primary lung bud formation;GO:0010621 negative regulation of transcription by transcription factor localization;GO:0016973 poly(A)+ mRNA export from nucleus		Transcription factors/Helix-turn-helix domains	Mitochondria;Nucleoplasm(Approved)			(M5938)HALLMARK REACTIVE OXIGEN SPECIES PATHWAY	0.0	1.0	0.0	0.0	0.0	0.0	0.0	0.0	0.0	0.0	0.0	1.0	0.0	0.0	1.0	0.0	0.0	0.0	0.0	0.0
MGAT4A	11320	symbol	H. sapiens	11320	H. sapiens	MGAT4A	mannosyl (alpha-1,3-)-glycoprotein beta-1,4-N-acetylglucosaminyltransferase, isozyme A	GO:0006491 N-glycan processing;GO:0006487 protein N-linked glycosylation;GO:0043687 post-translational protein modification		Enzymes/ENZYME proteins/Transferases	Golgi apparatus(Approved)				0.0	0.0	0.0	0.0	0.0	0.0	0.0	0.0	0.0	0.0	0.0	0.0	0.0	0.0	0.0	0.0	0.0	0.0	0.0	0.0
PMF1	11243	symbol	H. sapiens	11243	H. sapiens	PMF1	polyamine modulated factor 1	GO:0007062 sister chromatid cohesion;GO:0000819 sister chromatid segregation;GO:0098813 nuclear chromosome segregation			Nucleoplasm;Vesicles(Approved)				0.0	0.0	0.0	0.0	0.0	0.0	0.0	0.0	0.0	0.0	0.0	0.0	1.0	0.0	0.0	0.0	0.0	0.0	0.0	0.0
EMSY	56946	symbol	H. sapiens	56946	H. sapiens	EMSY	EMSY, BRCA2 interacting transcriptional repressor	GO:0016569 covalent chromatin modification;GO:0006281 DNA repair;GO:0006325 chromatin organization			Nucleoplasm(Enhanced)				0.0	0.0	0.0	0.0	0.0	0.0	0.0	1.0	0.0	0.0	0.0	0.0	0.0	0.0	0.0	0.0	0.0	0.0	0.0	0.0
CLEC12B	387837	symbol	H. sapiens	387837	H. sapiens	CLEC12B	C-type lectin domain family 12 member B	GO:0002769 natural killer cell inhibitory signaling pathway;GO:0045953 negative regulation of natural killer cell mediated cytotoxicity;GO:0002767 immune response-inhibiting cell surface receptor signaling pathway					(M5880)NABA ECM AFFILIATED; (M5885)NABA MATRISOME ASSOCIATED; (M5889)NABA MATRISOME		0.0	0.0	0.0	1.0	1.0	0.0	1.0	0.0	0.0	0.0	0.0	0.0	0.0	0.0	0.0	0.0	0.0	0.0	0.0	1.0
RNF135	84282	symbol	H. sapiens	84282	H. sapiens	RNF135	ring finger protein 135	GO:0032728 positive regulation of interferon-beta production;GO:0032480 negative regulation of type I interferon production;GO:0032648 regulation of interferon-beta production		Enzymes/ENZYME proteins/Transferases	Vesicles(Approved)				0.0	0.0	1.0	1.0	0.0	0.0	0.0	0.0	0.0	0.0	0.0	0.0	0.0	0.0	0.0	0.0	0.0	0.0	0.0	0.0
DCAF12	25853	symbol	H. sapiens	25853	H. sapiens	DCAF12	DDB1 and CUL4 associated factor 12	GO:0016567 protein ubiquitination;GO:0032446 protein modification by small protein conjugation;GO:0070647 protein modification by small protein conjugation or removal							0.0	0.0	1.0	0.0	0.0	0.0	0.0	0.0	0.0	0.0	0.0	0.0	0.0	0.0	0.0	0.0	0.0	0.0	0.0	0.0
CSF1R	1436	symbol	H. sapiens	1436	H. sapiens	CSF1R	colony stimulating factor 1 receptor	GO:0090197 positive regulation of chemokine secretion;GO:0038145 macrophage colony-stimulating factor signaling pathway;GO:0090196 regulation of chemokine secretion	Tyr protein kinase family	CD markers;Enzymes/{ENZYME proteins/Transferases,Kinases/Tyr protein kinases};RAS pathway related proteins	Plasma membrane(Supported)Vesicles(Approved)	Imatinib (Protein homodimerization activity);Sunitinib (Protein homodimerization activity);ABT-869 (Protein homodimerization activity);5-CYANO-FURAN-2-CARBOXYLIC ACID [5-HYDROXYMETHYL-2-(4-METHYL-PIPERIDIN-1-YL)-PHENYL]-AMIDE (Protein homodimerization activity);6-CHLORO-3-(3-METHYLISOXAZOL-5-YL)-4-PHENYLQUINOLIN-2(1H)-ONE (Protein homodimerization activity)	(M91)PID TCPTP PATHWAY; (M50)PID PTP1B PATHWAY; (M160)PID AVB3 INTEGRIN PATHWAY		0.0	1.0	0.0	1.0	0.0	0.0	0.0	0.0	0.0	1.0	0.0	1.0	0.0	0.0	1.0	0.0	0.0	0.0	1.0	0.0
UBTD1	80019	symbol	H. sapiens	80019	H. sapiens	UBTD1	ubiquitin domain containing 1				Cytosol;Plasma membrane;Vesicles(Approved)				0.0	0.0	0.0	0.0	0.0	0.0	0.0	0.0	0.0	0.0	0.0	0.0	0.0	0.0	0.0	0.0	0.0	0.0	0.0	0.0
RASA1	5921	symbol	H. sapiens	5921	H. sapiens	RASA1	RAS p21 protein activator 1	GO:0001953 negative regulation of cell-matrix adhesion;GO:0001570 vasculogenesis;GO:0010812 negative regulation of cell-substrate adhesion		RAS pathway related proteins			(M226)PID VEGFR1 PATHWAY; (M269)PID RAS PATHWAY; (M242)PID AURORA A PATHWAY	(M5919)HALLMARK HEDGEHOG SIGNALING; (M5893)HALLMARK MITOTIC SPINDLE; (M5915)HALLMARK APICAL JUNCTION	0.0	1.0	0.0	0.0	1.0	0.0	0.0	0.0	1.0	0.0	0.0	0.0	0.0	0.0	0.0	0.0	0.0	0.0	0.0	0.0
TMEM173	340061	symbol	H. sapiens	340061	H. sapiens	TMEM173	transmembrane protein 173	GO:0033160 positive regulation of protein import into nucleus, translocation;GO:0042993 positive regulation of transcription factor import into nucleus;GO:0033158 regulation of protein import into nucleus, translocation							1.0	0.0	0.0	1.0	0.0	0.0	1.0	0.0	0.0	0.0	0.0	0.0	0.0	0.0	0.0	0.0	1.0	0.0	0.0	1.0
ERICH1	157697	symbol	H. sapiens	157697	H. sapiens	ERICH1	glutamate rich 1				Cytosol;Nucleoli fibrillar center;Nucleus(Approved)				0.0	0.0	0.0	0.0	0.0	0.0	0.0	0.0	0.0	0.0	0.0	0.0	0.0	0.0	0.0	0.0	0.0	0.0	0.0	0.0
RPSA	3921	symbol	H. sapiens	3921	H. sapiens	RPSA	ribosomal protein SA	GO:0000461 endonucleolytic cleavage to generate mature 3'-end of SSU-rRNA from (SSU-rRNA, 5.8S rRNA, LSU-rRNA);GO:0006407 rRNA export from nucleus;GO:0000447 endonucleolytic cleavage in ITS1 to separate SSU-rRNA from 5.8S rRNA and LSU-rRNA from tricistronic rRNA transcript (SSU-rRNA, 5.8S rRNA, LSU-rRNA)		Ribosomal proteins	Cytosol;Plasma membrane(Supported)	PCK3145 (Virus receptor activity)	(M17761)ST WNT BETA CATENIN PATHWAY		0.0	0.0	0.0	0.0	0.0	0.0	0.0	0.0	0.0	0.0	0.0	0.0	0.0	0.0	0.0	0.0	1.0	0.0	0.0	0.0
ZNF282	8427	symbol	H. sapiens	8427	H. sapiens	ZNF282	zinc finger protein 282	GO:0045892 negative regulation of transcription, DNA-templated;GO:1903507 negative regulation of nucleic acid-templated transcription;GO:1902679 negative regulation of RNA biosynthetic process		Transcription factors/Zinc-coordinating DNA-binding domains	Cytosol;Nucleoplasm(Approved)				0.0	0.0	0.0	0.0	0.0	0.0	0.0	0.0	0.0	0.0	0.0	0.0	0.0	0.0	0.0	0.0	0.0	0.0	0.0	0.0
PRUNE1	58497	symbol	H. sapiens	58497	H. sapiens	PRUNE1	prune exopolyphosphatase 1	GO:0031113 regulation of microtubule polymerization;GO:0031110 regulation of microtubule polymerization or depolymerization;GO:0046785 microtubule polymerization		Enzymes/ENZYME proteins/Hydrolases	Cytosol(Supported)				0.0	0.0	0.0	0.0	0.0	0.0	0.0	0.0	0.0	0.0	0.0	0.0	0.0	0.0	0.0	0.0	0.0	0.0	0.0	0.0
PLOD1	5351	symbol	H. sapiens	5351	H. sapiens	PLOD1	procollagen-lysine,2-oxoglutarate 5-dioxygenase 1	GO:0046947 hydroxylysine biosynthetic process;GO:0046946 hydroxylysine metabolic process;GO:0017185 peptidyl-lysine hydroxylation		Enzymes/ENZYME proteins/Oxidoreductases	Nucleoplasm;Vesicles(Uncertain)	Vitamin C (Protein homodimerization activity);Succinic acid (Protein homodimerization activity)	(M3468)NABA ECM REGULATORS; (M5885)NABA MATRISOME ASSOCIATED; (M5889)NABA MATRISOME	(M5930)HALLMARK EPITHELIAL MESENCHYMAL TRANSITION; (M5937)HALLMARK GLYCOLYSIS	0.0	0.0	0.0	0.0	0.0	0.0	0.0	1.0	0.0	0.0	0.0	0.0	0.0	0.0	0.0	0.0	0.0	0.0	0.0	0.0
ZFPL1	7542	symbol	H. sapiens	7542	H. sapiens	ZFPL1	zinc finger protein like 1	GO:0016192 vesicle-mediated transport;GO:0006355 regulation of transcription, DNA-templated;GO:1903506 regulation of nucleic acid-templated transcription			Golgi apparatus(Enhanced)				0.0	0.0	0.0	0.0	0.0	0.0	0.0	0.0	0.0	0.0	0.0	0.0	0.0	0.0	0.0	0.0	0.0	0.0	0.0	0.0
CORO1B	57175	symbol	H. sapiens	57175	H. sapiens	CORO1B	coronin 1B	GO:0034316 negative regulation of Arp2/3 complex-mediated actin nucleation;GO:0051126 negative regulation of actin nucleation;GO:0071672 negative regulation of smooth muscle cell chemotaxis			Cytosol;Plasma membrane(Enhanced)				0.0	0.0	0.0	1.0	0.0	0.0	0.0	0.0	0.0	0.0	0.0	0.0	0.0	0.0	0.0	0.0	0.0	0.0	0.0	0.0
VPS26B	112936	symbol	H. sapiens	112936	H. sapiens	VPS26B	VPS26, retromer complex component B	GO:0071346 cellular response to interferon-gamma;GO:0016241 regulation of macroautophagy;GO:0042147 retrograde transport, endosome to Golgi							0.0	0.0	0.0	0.0	0.0	0.0	0.0	0.0	0.0	0.0	0.0	0.0	0.0	0.0	0.0	0.0	0.0	0.0	0.0	0.0
CD52	1043	symbol	H. sapiens	1043	H. sapiens	CD52	CD52 molecule	GO:0006501 C-terminal protein lipidation;GO:0007204 positive regulation of cytosolic calcium ion concentration;GO:0051480 regulation of cytosolic calcium ion concentration		CD markers		Alemtuzumab			0.0	0.0	0.0	0.0	0.0	0.0	0.0	0.0	0.0	0.0	0.0	0.0	0.0	0.0	0.0	0.0	0.0	0.0	0.0	0.0
TNFSF12	8742	symbol	H. sapiens	8742	H. sapiens	TNFSF12	TNF superfamily member 12	GO:0045766 positive regulation of angiogenesis;GO:2001238 positive regulation of extrinsic apoptotic signaling pathway;GO:0001938 positive regulation of endothelial cell proliferation					(M5883)NABA SECRETED FACTORS; (M5885)NABA MATRISOME ASSOCIATED; (M5889)NABA MATRISOME		0.0	0.0	0.0	0.0	0.0	0.0	0.0	0.0	1.0	1.0	0.0	0.0	0.0	0.0	0.0	0.0	0.0	0.0	0.0	0.0
CSTF2T	23283	symbol	H. sapiens	23283	H. sapiens	CSTF2T	cleavage stimulation factor subunit 2 tau variant	GO:0098789 pre-mRNA cleavage required for polyadenylation;GO:0098787 mRNA cleavage involved in mRNA processing;GO:0006369 termination of RNA polymerase II transcription			Nucleoplasm(Enhanced)				0.0	0.0	0.0	0.0	0.0	0.0	0.0	0.0	0.0	0.0	0.0	0.0	0.0	0.0	0.0	0.0	0.0	0.0	0.0	0.0
XPO7	23039	symbol	H. sapiens	23039	H. sapiens	XPO7	exportin 7	GO:0051028 mRNA transport;GO:0006611 protein export from nucleus;GO:0051168 nuclear export		Transporters/Transporter channels and pores	Nucleus(Approved)			(M5945)HALLMARK HEME METABOLISM	0.0	0.0	0.0	0.0	0.0	0.0	0.0	0.0	0.0	0.0	0.0	0.0	0.0	0.0	0.0	0.0	0.0	0.0	0.0	0.0
SLC2A14	144195	symbol	H. sapiens	144195	H. sapiens	SLC2A14	solute carrier family 2 member 14	GO:1904659 glucose transmembrane transport;GO:0008645 hexose transmembrane transport;GO:0015749 monosaccharide transmembrane transport		Transporters/Electrochemical Potential-driven transporters	Plasma membrane(Approved)				0.0	0.0	0.0	0.0	0.0	0.0	0.0	0.0	0.0	0.0	0.0	0.0	0.0	0.0	0.0	0.0	0.0	0.0	0.0	0.0
CEP19	84984	symbol	H. sapiens	84984	H. sapiens	CEP19	centrosomal protein 19	GO:0097712 vesicle targeting, trans-Golgi to periciliary membrane compartment;GO:0034454 microtubule anchoring at centrosome;GO:0072393 microtubule anchoring at microtubule organizing center			Centrosome(Supported)				0.0	0.0	0.0	0.0	0.0	0.0	0.0	0.0	0.0	0.0	0.0	0.0	0.0	0.0	0.0	0.0	0.0	0.0	0.0	0.0
IPO8	10526	symbol	H. sapiens	10526	H. sapiens	IPO8	importin 8	GO:0060964 regulation of gene silencing by miRNA;GO:0060147 regulation of posttranscriptional gene silencing;GO:0060966 regulation of gene silencing by RNA		Transporters/Transporter channels and pores	Nucleus(Supported)				0.0	0.0	0.0	0.0	0.0	0.0	0.0	0.0	0.0	0.0	0.0	0.0	0.0	0.0	0.0	0.0	0.0	0.0	0.0	0.0
NEK9	91754	symbol	H. sapiens	91754	H. sapiens	NEK9	NIMA related kinase 9	GO:0007077 mitotic nuclear envelope disassembly;GO:0051081 nuclear envelope disassembly;GO:0030397 membrane disassembly	NEK Ser/Thr protein kinase family	Enzymes/{ENZYME proteins/Transferases,Kinases/NEK Ser/Thr protein kinases};Transporters/Transporter channels and pores	Mitochondria(Approved)				0.0	0.0	0.0	0.0	0.0	0.0	0.0	0.0	0.0	0.0	0.0	0.0	1.0	0.0	0.0	0.0	0.0	0.0	0.0	0.0
BRD8	10902	symbol	H. sapiens	10902	H. sapiens	BRD8	bromodomain containing 8	GO:0043968 histone H2A acetylation;GO:0043967 histone H4 acetylation;GO:0016573 histone acetylation			Mitochondria;Nucleoplasm(Approved)				0.0	0.0	0.0	0.0	0.0	0.0	0.0	1.0	0.0	0.0	0.0	0.0	0.0	0.0	0.0	0.0	0.0	0.0	0.0	0.0
RPLP0	6175	symbol	H. sapiens	6175	H. sapiens	RPLP0	ribosomal protein lateral stalk subunit P0	GO:0035722 interleukin-12-mediated signaling pathway;GO:0006614 SRP-dependent cotranslational protein targeting to membrane;GO:0071349 cellular response to interleukin-12		Ribosomal proteins	Cytosol;Endoplasmic reticulum(Supported)			(M5926)HALLMARK MYC TARGETS V1	0.0	0.0	0.0	0.0	0.0	0.0	0.0	0.0	0.0	1.0	0.0	0.0	0.0	0.0	0.0	0.0	1.0	0.0	0.0	0.0
OPRL1	4987	symbol	H. sapiens	4987	H. sapiens	OPRL1	opioid related nociceptin receptor 1	GO:1901386 negative regulation of voltage-gated calcium channel activity;GO:0060454 positive regulation of gastric acid secretion;GO:0106072 negative regulation of adenylate cyclase-activating G-protein coupled receptor signaling pathway		G-protein coupled receptors/GPCRs excl olfactory receptors		Etorphine (Nociceptin receptor activity);Epicept NP-1 (Nociceptin receptor activity)			0.0	0.0	0.0	0.0	0.0	0.0	0.0	0.0	0.0	0.0	0.0	0.0	0.0	0.0	0.0	0.0	0.0	0.0	0.0	0.0
TLR9	54106	symbol	H. sapiens	54106	H. sapiens	TLR9	toll like receptor 9	GO:1901895 negative regulation of calcium-transporting ATPase activity;GO:0034163 regulation of toll-like receptor 9 signaling pathway;GO:0045356 positive regulation of interferon-alpha biosynthetic process		CD markers		Chloroquine (Transmembrane signaling receptor activity);Hydroxychloroquine (Transmembrane signaling receptor activity);ISS-1018 (Transmembrane signaling receptor activity);SCV-07 (Transmembrane signaling receptor activity)			0.0	1.0	0.0	1.0	1.0	0.0	1.0	0.0	0.0	0.0	0.0	0.0	0.0	1.0	0.0	0.0	0.0	0.0	0.0	1.0
HEY1	23462	symbol	H. sapiens	23462	H. sapiens	HEY1	hes related family bHLH transcription factor with YRPW motif 1	GO:0035912 dorsal aorta morphogenesis;GO:2000820 negative regulation of transcription from RNA polymerase II promoter involved in smooth muscle cell differentiation;GO:0003190 atrioventricular valve formation		Transcription factors/Basic domains	Cytosol;Nuclear membrane;Nucleoplasm(Approved)		(M288)PID HES HEY PATHWAY	(M5919)HALLMARK HEDGEHOG SIGNALING; (M5895)HALLMARK WNT BETA CATENIN SIGNALING	0.0	0.0	0.0	0.0	0.0	0.0	0.0	0.0	0.0	0.0	0.0	0.0	0.0	0.0	0.0	0.0	0.0	0.0	0.0	0.0
FBXO18	84893	gene_synonym	H. sapiens	84893	H. sapiens	FBH1	F-box DNA helicase 1	GO:0072429 response to intra-S DNA damage checkpoint signaling;GO:2000042 negative regulation of double-strand break repair via homologous recombination;GO:1902231 positive regulation of intrinsic apoptotic signaling pathway in response to DNA damage		Enzymes/ENZYME proteins/Hydrolases					0.0	0.0	1.0	0.0	0.0	0.0	0.0	0.0	1.0	0.0	0.0	0.0	0.0	0.0	0.0	0.0	0.0	0.0	0.0	0.0
ZFAND2B	130617	symbol	H. sapiens	130617	H. sapiens	ZFAND2B	zinc finger AN1-type containing 2B	GO:0006616 SRP-dependent cotranslational protein targeting to membrane, translocation;GO:0006614 SRP-dependent cotranslational protein targeting to membrane;GO:0006613 cotranslational protein targeting to membrane			Cytosol;Nucleoli;Nucleus(Approved)				0.0	0.0	0.0	0.0	0.0	0.0	0.0	0.0	0.0	0.0	0.0	0.0	0.0	0.0	0.0	0.0	0.0	0.0	0.0	0.0
UBE3B	89910	symbol	H. sapiens	89910	H. sapiens	UBE3B	ubiquitin protein ligase E3B	GO:0016567 protein ubiquitination;GO:0032446 protein modification by small protein conjugation;GO:0070647 protein modification by small protein conjugation or removal		Enzymes/ENZYME proteins/Transferases	Mitochondria;Nuclear speckles(Approved)				0.0	0.0	1.0	0.0	0.0	0.0	0.0	0.0	0.0	0.0	0.0	0.0	0.0	0.0	0.0	0.0	0.0	0.0	0.0	0.0
C6orf47	57827	symbol	H. sapiens	57827	H. sapiens	C6orf47	chromosome 6 open reading frame 47				Cytosol(Approved)				0.0	0.0	0.0	0.0	0.0	0.0	0.0	0.0	0.0	0.0	0.0	0.0	0.0	0.0	0.0	0.0	0.0	0.0	0.0	0.0
STAMBP	10617	symbol	H. sapiens	10617	H. sapiens	STAMBP	STAM binding protein	GO:0014067 negative regulation of phosphatidylinositol 3-kinase signaling;GO:0046580 negative regulation of Ras protein signal transduction;GO:0014066 regulation of phosphatidylinositol 3-kinase signaling		Enzymes/Peptidases/Metallopeptidases	Cytosol;Nucleoplasm;Plasma membrane(Enhanced)		(M214)PID ERBB1 INTERNALIZATION PATHWAY		0.0	0.0	0.0	0.0	0.0	0.0	0.0	0.0	0.0	0.0	0.0	0.0	0.0	0.0	0.0	0.0	0.0	0.0	0.0	0.0
MRPL28	10573	symbol	H. sapiens	10573	H. sapiens	MRPL28	mitochondrial ribosomal protein L28	GO:0070126 mitochondrial translational termination;GO:0070125 mitochondrial translational elongation;GO:0006415 translational termination		Ribosomal proteins	Mitochondria(Supported)				0.0	0.0	0.0	0.0	0.0	0.0	0.0	0.0	0.0	0.0	0.0	0.0	0.0	0.0	0.0	0.0	0.0	0.0	0.0	0.0
ZNF654	55279	symbol	H. sapiens	55279	H. sapiens	ZNF654	zinc finger protein 654	GO:0006355 regulation of transcription, DNA-templated;GO:1903506 regulation of nucleic acid-templated transcription;GO:0006351 transcription, DNA-templated		Transcription factors/Zinc-coordinating DNA-binding domains	Microtubules(Supported)Nucleoplasm(Approved)				0.0	0.0	0.0	0.0	0.0	0.0	0.0	0.0	0.0	0.0	0.0	0.0	0.0	0.0	0.0	0.0	0.0	0.0	0.0	0.0
CDC42EP2	10435	symbol	H. sapiens	10435	H. sapiens	CDC42EP2	CDC42 effector protein 2	GO:0031274 positive regulation of pseudopodium assembly;GO:0031272 regulation of pseudopodium assembly;GO:0031269 pseudopodium assembly			Cytosol;Microtubules(Supported)			(M5893)HALLMARK MITOTIC SPINDLE	0.0	0.0	0.0	0.0	0.0	0.0	0.0	0.0	1.0	0.0	0.0	0.0	0.0	0.0	0.0	0.0	0.0	0.0	0.0	0.0
CMTM1	113540	symbol	H. sapiens	113540	H. sapiens	CMTM1	CKLF like MARVEL transmembrane domain containing 1	GO:0010469 regulation of signaling receptor activity;GO:0006935 chemotaxis;GO:0042330 taxis		Transporters/Transporter channels and pores	Nucleoplasm(Approved)				0.0	0.0	0.0	0.0	0.0	0.0	0.0	0.0	0.0	0.0	0.0	0.0	0.0	0.0	0.0	0.0	0.0	0.0	0.0	0.0
PRR12	57479	symbol	H. sapiens	57479	H. sapiens	PRR12	proline rich 12				Cytosol(Approved)				0.0	0.0	0.0	0.0	0.0	0.0	0.0	0.0	0.0	0.0	0.0	0.0	0.0	0.0	0.0	0.0	0.0	0.0	0.0	0.0
COASY	80347	symbol	H. sapiens	80347	H. sapiens	COASY	Coenzyme A synthase	GO:0015937 coenzyme A biosynthetic process;GO:0034030 ribonucleoside bisphosphate biosynthetic process;GO:0034033 purine nucleoside bisphosphate biosynthetic process		Enzymes/ENZYME proteins/Transferases	Cytosol;Nucleoplasm(Approved)				0.0	0.0	0.0	0.0	0.0	0.0	0.0	0.0	0.0	0.0	0.0	0.0	0.0	0.0	0.0	0.0	0.0	0.0	0.0	0.0
ARL4C	10123	symbol	H. sapiens	10123	H. sapiens	ARL4C	ADP ribosylation factor like GTPase 4C	GO:0032456 endocytic recycling;GO:0016197 endosomal transport;GO:0046907 intracellular transport			Cytosol;Plasma membrane(Supported)				0.0	0.0	0.0	0.0	0.0	0.0	0.0	0.0	0.0	0.0	0.0	0.0	0.0	0.0	0.0	0.0	0.0	0.0	0.0	0.0
CBFB	865	symbol	H. sapiens	865	H. sapiens	CBFB	core-binding factor beta subunit	GO:0050855 regulation of B cell receptor signaling pathway;GO:0045589 regulation of regulatory T cell differentiation;GO:2000810 regulation of bicellular tight junction assembly			Cytosol;Nucleus(Approved)		(M166)PID ATF2 PATHWAY; (M167)PID AP1 PATHWAY; (M2)PID SMAD2 3NUCLEAR PATHWAY		0.0	1.0	1.0	0.0	0.0	0.0	1.0	0.0	0.0	1.0	0.0	0.0	0.0	0.0	1.0	0.0	0.0	0.0	0.0	0.0
ARL3	403	symbol	H. sapiens	403	H. sapiens	ARL3	ADP ribosylation factor like GTPase 3	GO:0042073 intraciliary transport;GO:0042461 photoreceptor cell development;GO:0046530 photoreceptor cell differentiation			Centrosome(Supported)Nucleus(Approved)	2-(N-Morpholino)-Ethanesulfonic Acid (Microtubule binding);Guanosine-5'-Diphosphate (Microtubule binding)		(M5906)HALLMARK ESTROGEN RESPONSE EARLY; (M5907)HALLMARK ESTROGEN RESPONSE LATE	0.0	0.0	0.0	0.0	0.0	0.0	0.0	0.0	0.0	0.0	0.0	0.0	0.0	0.0	0.0	0.0	0.0	0.0	0.0	0.0
PPP1R21	129285	symbol	H. sapiens	129285	H. sapiens	PPP1R21	protein phosphatase 1 regulatory subunit 21				Vesicles(Approved)				0.0	0.0	0.0	0.0	0.0	0.0	0.0	0.0	0.0	0.0	0.0	0.0	0.0	0.0	0.0	0.0	0.0	0.0	0.0	0.0
SLC27A3	11000	symbol	H. sapiens	11000	H. sapiens	SLC27A3	solute carrier family 27 member 3	GO:0001676 long-chain fatty acid metabolic process;GO:0006631 fatty acid metabolic process;GO:0032787 monocarboxylic acid metabolic process		Transporters	Endoplasmic reticulum(Supported)				0.0	0.0	0.0	0.0	0.0	0.0	0.0	0.0	0.0	0.0	0.0	0.0	0.0	0.0	0.0	0.0	0.0	0.0	0.0	0.0
AGPAT2	10555	symbol	H. sapiens	10555	H. sapiens	AGPAT2	1-acylglycerol-3-phosphate O-acyltransferase 2	GO:0016024 CDP-diacylglycerol biosynthetic process;GO:0006654 phosphatidic acid biosynthetic process;GO:0046341 CDP-diacylglycerol metabolic process		Enzymes/ENZYME proteins/Transferases	Centrosome(Approved)				1.0	0.0	0.0	1.0	0.0	0.0	0.0	0.0	0.0	1.0	0.0	0.0	0.0	0.0	0.0	0.0	0.0	0.0	0.0	0.0
DUT	1854	symbol	H. sapiens	1854	H. sapiens	DUT	deoxyuridine triphosphatase	GO:0046081 dUTP catabolic process;GO:0006226 dUMP biosynthetic process;GO:0046080 dUTP metabolic process		Enzymes/ENZYME proteins/Hydrolases	Nucleoplasm(Supported)	Deoxyuridine-5'-Diphosphate (Poly(a) rna binding);1-{(2S,5S)-4-FLUORO-5-[(TRITYLOXY)METHYL]TETRAHYDROFURAN-2-YL}PYRIMIDINE-2,4(1H,3H)-DIONE (Poly(a) rna binding)		(M5898)HALLMARK DNA REPAIR; (M5926)HALLMARK MYC TARGETS V1; (M5925)HALLMARK E2F TARGETS	0.0	0.0	0.0	0.0	0.0	0.0	0.0	0.0	0.0	0.0	0.0	0.0	0.0	0.0	0.0	0.0	0.0	1.0	0.0	0.0
TNFRSF12A	51330	symbol	H. sapiens	51330	H. sapiens	TNFRSF12A	TNF receptor superfamily member 12A	GO:0045773 positive regulation of axon extension;GO:0006931 substrate-dependent cell migration, cell attachment to substrate;GO:0050772 positive regulation of axonogenesis		CD markers	Cytosol;Plasma membrane(Approved)			(M5892)HALLMARK CHOLESTEROL HOMEOSTASIS; (M5897)HALLMARK IL6 JAK STAT3 SIGNALING; (M5902)HALLMARK APOPTOSIS	0.0	0.0	0.0	0.0	0.0	0.0	0.0	0.0	1.0	1.0	0.0	0.0	0.0	0.0	0.0	0.0	0.0	0.0	0.0	0.0
CREB3L2	64764	symbol	H. sapiens	64764	H. sapiens	CREB3L2	cAMP responsive element binding protein 3 like 2	GO:0030968 endoplasmic reticulum unfolded protein response;GO:0002062 chondrocyte differentiation;GO:0034620 cellular response to unfolded protein		Transcription factors/Basic domains	Nucleoplasm(Supported)Endoplasmic reticulum(Approved)				0.0	0.0	0.0	0.0	0.0	0.0	0.0	0.0	0.0	0.0	0.0	0.0	0.0	0.0	0.0	0.0	0.0	0.0	0.0	0.0
SDF2	6388	symbol	H. sapiens	6388	H. sapiens	SDF2	stromal cell derived factor 2	GO:0071712 ER-associated misfolded protein catabolic process;GO:0035269 protein O-linked mannosylation;GO:0035268 protein mannosylation			Vesicles(Approved)	Malonate Ion (Dolichyl-phosphate-mannose-protein mannosyltransferase activity)			0.0	0.0	0.0	0.0	0.0	0.0	0.0	0.0	0.0	0.0	0.0	0.0	0.0	0.0	0.0	0.0	0.0	0.0	0.0	0.0
PIGS	94005	symbol	H. sapiens	94005	H. sapiens	PIGS	phosphatidylinositol glycan anchor biosynthesis class S	GO:0016255 attachment of GPI anchor to protein;GO:0006506 GPI anchor biosynthetic process;GO:0006505 GPI anchor metabolic process							0.0	0.0	0.0	0.0	0.0	0.0	0.0	0.0	0.0	0.0	0.0	0.0	0.0	0.0	0.0	0.0	0.0	0.0	0.0	0.0
CD6	923	symbol	H. sapiens	923	H. sapiens	CD6	CD6 molecule	GO:1900017 positive regulation of cytokine production involved in inflammatory response;GO:0031663 lipopolysaccharide-mediated signaling pathway;GO:0042102 positive regulation of T cell proliferation		CD markers					0.0	1.0	0.0	1.0	0.0	0.0	0.0	0.0	0.0	0.0	0.0	0.0	0.0	0.0	0.0	0.0	0.0	0.0	0.0	1.0
CLDN9	9080	symbol	H. sapiens	9080	H. sapiens	CLDN9	claudin 9	GO:0046718 viral entry into host cell;GO:0016338 calcium-independent cell-cell adhesion via plasma membrane cell-adhesion molecules;GO:0030260 entry into host cell			Cell Junctions(Supported)Vesicles(Approved)			(M5915)HALLMARK APICAL JUNCTION; (M5937)HALLMARK GLYCOLYSIS	0.0	1.0	0.0	0.0	0.0	0.0	0.0	0.0	0.0	0.0	0.0	0.0	0.0	0.0	0.0	0.0	1.0	0.0	0.0	0.0
DHRS9	10170	symbol	H. sapiens	10170	H. sapiens	DHRS9	dehydrogenase/reductase 9	GO:0042904 9-cis-retinoic acid biosynthetic process;GO:0042905 9-cis-retinoic acid metabolic process;GO:0002138 retinoic acid biosynthetic process							0.0	0.0	0.0	0.0	0.0	0.0	0.0	0.0	0.0	0.0	0.0	0.0	0.0	0.0	0.0	0.0	0.0	0.0	0.0	0.0
PDCD10	11235	symbol	H. sapiens	11235	H. sapiens	PDCD10	programmed cell death 10	GO:1903588 negative regulation of blood vessel endothelial cell proliferation involved in sprouting angiogenesis;GO:0090051 negative regulation of cell migration involved in sprouting angiogenesis;GO:0036481 intrinsic apoptotic signaling pathway in response to hydrogen peroxide					(M66)PID MYC ACTIV PATHWAY		0.0	0.0	0.0	0.0	0.0	0.0	0.0	0.0	0.0	0.0	0.0	0.0	0.0	0.0	0.0	0.0	0.0	0.0	0.0	0.0
RRAGA	10670	symbol	H. sapiens	10670	H. sapiens	RRAGA	Ras related GTP binding A	GO:1904263 positive regulation of TORC1 signaling;GO:0045919 positive regulation of cytolysis;GO:0019048 modulation by virus of host morphology or physiology			Golgi apparatus;Vesicles(Approved)		(M121)PID MTOR 4PATHWAY		0.0	0.0	1.0	0.0	0.0	0.0	0.0	0.0	0.0	0.0	0.0	0.0	1.0	0.0	0.0	0.0	1.0	0.0	0.0	0.0
TMEM45B	120224	symbol	H. sapiens	120224	H. sapiens	TMEM45B	transmembrane protein 45B				Cytosol;Nucleoplasm(Uncertain)				0.0	0.0	0.0	0.0	0.0	0.0	0.0	0.0	0.0	0.0	0.0	0.0	0.0	0.0	0.0	0.0	0.0	0.0	0.0	0.0
SEC23A	10484	symbol	H. sapiens	10484	H. sapiens	SEC23A	Sec23 homolog A, coat complex II component	GO:0048208 COPII vesicle coating;GO:0090110 cargo loading into COPII-coated vesicle;GO:0048207 vesicle targeting, rough ER to cis-Golgi			Nucleoplasm;Vesicles(Approved)				0.0	0.0	1.0	0.0	0.0	0.0	0.0	0.0	0.0	0.0	0.0	0.0	0.0	0.0	0.0	0.0	0.0	0.0	0.0	0.0
ROPN1L	83853	symbol	H. sapiens	83853	H. sapiens	ROPN1L	rhophilin associated tail protein 1 like	GO:0048240 sperm capacitation;GO:0003351 epithelial cilium movement;GO:0007286 spermatid development							0.0	0.0	0.0	0.0	0.0	0.0	0.0	0.0	0.0	0.0	0.0	0.0	0.0	0.0	0.0	0.0	0.0	0.0	0.0	0.0
FANCA	2175	symbol	H. sapiens	2175	H. sapiens	FANCA	Fanconi anemia complementation group A	GO:0045589 regulation of regulatory T cell differentiation;GO:0045066 regulatory T cell differentiation;GO:2000348 regulation of CD40 signaling pathway			Nucleus(Supported)		(M258)PID BARD1 PATHWAY; (M1)PID FANCONI PATHWAY		0.0	1.0	0.0	1.0	0.0	0.0	0.0	0.0	0.0	0.0	0.0	0.0	0.0	0.0	0.0	0.0	0.0	0.0	0.0	0.0
TST	7263	symbol	H. sapiens	7263	H. sapiens	TST	thiosulfate sulfurtransferase	GO:0035928 rRNA import into mitochondrion;GO:0009440 cyanate catabolic process;GO:0009439 cyanate metabolic process		Enzymes/ENZYME proteins/Transferases	Mitochondria(Supported)	S-Mercaptocysteine (Thiosulfate sulfurtransferase activity)		(M5941)HALLMARK UV RESPONSE UP; (M5907)HALLMARK ESTROGEN RESPONSE LATE; (M5905)HALLMARK ADIPOGENESIS	0.0	0.0	0.0	0.0	0.0	0.0	0.0	0.0	0.0	0.0	0.0	0.0	0.0	0.0	0.0	0.0	0.0	0.0	0.0	0.0
CDC27	996	symbol	H. sapiens	996	H. sapiens	CDC27	cell division cycle 27	GO:0031145 anaphase-promoting complex-dependent catabolic process;GO:0007091 metaphase/anaphase transition of mitotic cell cycle;GO:0070979 protein K11-linked ubiquitination			Nucleoplasm(Enhanced)			(M5901)HALLMARK G2M CHECKPOINT; (M5893)HALLMARK MITOTIC SPINDLE; (M5945)HALLMARK HEME METABOLISM	0.0	0.0	1.0	0.0	0.0	0.0	0.0	0.0	0.0	0.0	0.0	0.0	1.0	0.0	0.0	0.0	0.0	0.0	0.0	0.0
EVL	51466	symbol	H. sapiens	51466	H. sapiens	EVL	Enah/Vasp-like	GO:1900028 negative regulation of ruffle assembly;GO:0051496 positive regulation of stress fiber assembly;GO:0051492 regulation of stress fiber assembly			Cytosol;Vesicles(Approved)			(M5915)HALLMARK APICAL JUNCTION	0.0	0.0	1.0	0.0	0.0	0.0	0.0	0.0	0.0	0.0	1.0	0.0	1.0	0.0	0.0	0.0	0.0	1.0	0.0	0.0
GOLGA1	2800	symbol	H. sapiens	2800	H. sapiens	GOLGA1	golgin A1				Golgi apparatus(Enhanced)				0.0	0.0	0.0	0.0	0.0	0.0	0.0	0.0	0.0	0.0	0.0	0.0	0.0	0.0	0.0	0.0	0.0	0.0	0.0	0.0
MROH6	642475	symbol	H. sapiens	642475	H. sapiens	MROH6	maestro heat like repeat family member 6				Nucleus(Approved)				0.0	0.0	0.0	0.0	0.0	0.0	0.0	0.0	0.0	0.0	0.0	0.0	0.0	0.0	0.0	0.0	0.0	0.0	0.0	0.0
PPM1G	5496	symbol	H. sapiens	5496	H. sapiens	PPM1G	protein phosphatase, Mg2+/Mn2+ dependent 1G	GO:0035970 peptidyl-threonine dephosphorylation;GO:0007050 cell cycle arrest;GO:0006470 protein dephosphorylation		Enzymes/ENZYME proteins/Hydrolases	Nucleoplasm(Enhanced)			(M5926)HALLMARK MYC TARGETS V1	0.0	0.0	0.0	0.0	0.0	0.0	0.0	0.0	0.0	0.0	0.0	0.0	0.0	0.0	0.0	0.0	0.0	0.0	0.0	0.0
HIST1H2BD	3017	symbol	H. sapiens	3017	H. sapiens	HIST1H2BD	histone cluster 1 H2B family member d	GO:0006334 nucleosome assembly;GO:0031497 chromatin assembly;GO:0034728 nucleosome organization			Cytosol;Nucleoplasm(Approved)				0.0	0.0	1.0	0.0	0.0	0.0	0.0	1.0	0.0	0.0	0.0	0.0	1.0	0.0	0.0	0.0	0.0	0.0	0.0	0.0
MYEF2	50804	symbol	H. sapiens	50804	H. sapiens	MYEF2	myelin expression factor 2	GO:0014902 myotube differentiation;GO:0051146 striated muscle cell differentiation;GO:0042692 muscle cell differentiation			Nucleoplasm(Supported)		(M15743)ST GA12 PATHWAY; (M12012)ST P38 MAPK PATHWAY; (M3721)ST JNK MAPK PATHWAY		0.0	0.0	0.0	0.0	0.0	0.0	0.0	0.0	0.0	0.0	0.0	0.0	0.0	0.0	0.0	0.0	0.0	0.0	0.0	0.0
ASF1B	55723	symbol	H. sapiens	55723	H. sapiens	ASF1B	anti-silencing function 1B histone chaperone	GO:0006335 DNA replication-dependent nucleosome assembly;GO:0006336 DNA replication-independent nucleosome assembly;GO:0034723 DNA replication-dependent nucleosome organization			Nucleoplasm(Supported)			(M5925)HALLMARK E2F TARGETS	0.0	0.0	0.0	0.0	0.0	0.0	0.0	1.0	0.0	0.0	0.0	0.0	0.0	0.0	0.0	0.0	0.0	0.0	0.0	0.0
PDCD6	10016	symbol	H. sapiens	10016	H. sapiens	PDCD6	programmed cell death 6	GO:1902527 positive regulation of protein monoubiquitination;GO:0036324 vascular endothelial growth factor receptor-2 signaling pathway;GO:1902525 regulation of protein monoubiquitination		Transporters/Primary Active Transporters	Cytosol(Approved)				0.0	0.0	1.0	0.0	0.0	0.0	0.0	0.0	1.0	0.0	0.0	0.0	0.0	0.0	0.0	0.0	0.0	0.0	0.0	0.0
TOR2A	27433	symbol	H. sapiens	27433	H. sapiens	TOR2A	torsin family 2 member A	GO:0051085 chaperone cofactor-dependent protein refolding;GO:0051084 'de novo' posttranslational protein folding;GO:0006458 'de novo' protein folding							0.0	0.0	0.0	0.0	0.0	0.0	0.0	0.0	0.0	0.0	0.0	0.0	0.0	0.0	0.0	0.0	0.0	1.0	0.0	0.0
CCP110	9738	symbol	H. sapiens	9738	H. sapiens	CCP110	centriolar coiled-coil protein 110	GO:1902018 negative regulation of cilium assembly;GO:0032053 ciliary basal body organization;GO:0045724 positive regulation of cilium assembly			Centrosome(Supported)			(M5939)HALLMARK P53 PATHWAY; (M5925)HALLMARK E2F TARGETS	0.0	0.0	0.0	0.0	0.0	0.0	0.0	0.0	0.0	0.0	0.0	0.0	1.0	0.0	0.0	0.0	0.0	0.0	0.0	0.0
TRIM34	53840	symbol	H. sapiens	53840	H. sapiens	TRIM34	tripartite motif containing 34	GO:0060333 interferon-gamma-mediated signaling pathway;GO:0070206 protein trimerization;GO:0071346 cellular response to interferon-gamma			Centrosome;Nucleoli(Approved)				0.0	0.0	0.0	0.0	0.0	0.0	0.0	0.0	0.0	1.0	0.0	0.0	0.0	0.0	0.0	0.0	0.0	1.0	0.0	0.0
RNF146	81847	symbol	H. sapiens	81847	H. sapiens	RNF146	ring finger protein 146	GO:0070936 protein K48-linked ubiquitination;GO:0090263 positive regulation of canonical Wnt signaling pathway;GO:0051865 protein autoubiquitination		Enzymes/ENZYME proteins/Transferases	Cytosol;Plasma membrane(Supported)Nucleoplasm(Approved)				0.0	0.0	1.0	0.0	0.0	0.0	0.0	0.0	0.0	0.0	0.0	0.0	0.0	0.0	0.0	0.0	0.0	0.0	0.0	0.0
GLB1	2720	symbol	H. sapiens	2720	H. sapiens	GLB1	galactosidase beta 1	GO:0051413 response to cortisone;GO:0042340 keratan sulfate catabolic process;GO:0042339 keratan sulfate metabolic process		Enzymes/ENZYME proteins/Hydrolases	Golgi apparatus;Vesicles(Supported)				1.0	0.0	0.0	0.0	0.0	0.0	0.0	0.0	0.0	0.0	0.0	0.0	0.0	0.0	0.0	0.0	0.0	0.0	0.0	0.0
RETSAT	54884	symbol	H. sapiens	54884	H. sapiens	RETSAT	retinol saturase	GO:0042572 retinol metabolic process;GO:0001523 retinoid metabolic process;GO:0016101 diterpenoid metabolic process		Enzymes/ENZYME proteins/Oxidoreductases	Nucleoli(Approved)	Vitamin A (Oxidoreductase activity)		(M5949)HALLMARK PEROXISOME; (M5948)HALLMARK BILE ACID METABOLISM; (M5935)HALLMARK FATTY ACID METABOLISM	0.0	0.0	0.0	0.0	0.0	0.0	0.0	0.0	0.0	0.0	0.0	0.0	0.0	0.0	0.0	0.0	0.0	0.0	0.0	0.0
MTM1	4534	symbol	H. sapiens	4534	H. sapiens	MTM1	myotubularin 1	GO:0048633 positive regulation of skeletal muscle tissue growth;GO:0032435 negative regulation of proteasomal ubiquitin-dependent protein catabolic process;GO:0048631 regulation of skeletal muscle tissue growth		Enzymes/ENZYME proteins/Hydrolases	Plasma membrane(Supported)				0.0	0.0	0.0	0.0	0.0	0.0	0.0	0.0	0.0	0.0	0.0	0.0	0.0	0.0	0.0	0.0	0.0	0.0	0.0	0.0
MT1X	4501	symbol	H. sapiens	4501	H. sapiens	MT1X	metallothionein 1X	GO:0036018 cellular response to erythropoietin;GO:0036017 response to erythropoietin;GO:0071294 cellular response to zinc ion							0.0	0.0	0.0	0.0	0.0	0.0	0.0	0.0	0.0	0.0	0.0	0.0	1.0	0.0	0.0	0.0	0.0	0.0	0.0	0.0
PGM2	55276	symbol	H. sapiens	55276	H. sapiens	PGM2	phosphoglucomutase 2	GO:0019388 galactose catabolic process;GO:0006098 pentose-phosphate shunt;GO:0005980 glycogen catabolic process		Enzymes/ENZYME proteins/Isomerase	Intermediate filaments(Approved)			(M5891)HALLMARK HYPOXIA; (M5937)HALLMARK GLYCOLYSIS	1.0	0.0	0.0	0.0	0.0	0.0	0.0	0.0	0.0	0.0	0.0	0.0	0.0	0.0	0.0	0.0	0.0	0.0	0.0	0.0
STAM2	10254	symbol	H. sapiens	10254	H. sapiens	STAM2	signal transducing adaptor molecule 2	GO:0036258 multivesicular body assembly;GO:0042059 negative regulation of epidermal growth factor receptor signaling pathway;GO:0036257 multivesicular body organization			Vesicles(Supported)Cytosol;Nucleoplasm(Approved)		(M122)PID IL2 1PATHWAY	(M5897)HALLMARK IL6 JAK STAT3 SIGNALING; (M5951)HALLMARK SPERMATOGENESIS	0.0	0.0	0.0	0.0	0.0	0.0	0.0	0.0	0.0	0.0	0.0	0.0	0.0	0.0	0.0	0.0	0.0	0.0	0.0	0.0
MTA2	9219	symbol	H. sapiens	9219	H. sapiens	MTA2	metastasis associated 1 family member 2	GO:0010762 regulation of fibroblast migration;GO:0010761 fibroblast migration;GO:0006306 DNA methylation		Transcription factors/{Helix-turn-helix domains,Zinc-coordinating DNA-binding domains}	Nucleoplasm(Enhanced)		(M101)PID HDAC CLASSI PATHWAY		0.0	0.0	0.0	0.0	0.0	0.0	0.0	1.0	0.0	0.0	0.0	0.0	0.0	0.0	0.0	0.0	0.0	0.0	0.0	0.0
PHYKPL	85007	symbol	H. sapiens	85007	H. sapiens	PHYKPL	5-phosphohydroxy-L-lysine phospho-lyase	GO:0006554 lysine catabolic process;GO:0006553 lysine metabolic process;GO:0009068 aspartate family amino acid catabolic process		Enzymes/ENZYME proteins/Lyases	Mitochondria(Approved)	Pyridoxal Phosphate (Transaminase activity);L-Alanine (Transaminase activity)			0.0	0.0	0.0	0.0	0.0	0.0	0.0	0.0	0.0	0.0	0.0	0.0	0.0	0.0	0.0	0.0	0.0	0.0	0.0	0.0
CEP85L	387119	symbol	H. sapiens	387119	H. sapiens	CEP85L	centrosomal protein 85 like								0.0	0.0	0.0	0.0	0.0	0.0	0.0	0.0	0.0	0.0	0.0	0.0	0.0	0.0	0.0	0.0	0.0	0.0	0.0	0.0
ZNF862	643641	symbol	H. sapiens	643641	H. sapiens	ZNF862	zinc finger protein 862	GO:0006355 regulation of transcription, DNA-templated;GO:1903506 regulation of nucleic acid-templated transcription;GO:0006351 transcription, DNA-templated			Mitochondria(Approved)				0.0	0.0	0.0	0.0	0.0	0.0	0.0	0.0	0.0	0.0	0.0	0.0	0.0	0.0	0.0	0.0	0.0	0.0	0.0	0.0
GABBR1	2550	symbol	H. sapiens	2550	H. sapiens	GABBR1	gamma-aminobutyric acid type B receptor subunit 1	GO:0007194 negative regulation of adenylate cyclase activity;GO:0030818 negative regulation of cAMP biosynthetic process;GO:0045761 regulation of adenylate cyclase activity		G-protein coupled receptors/GPCRs excl olfactory receptors	Centrosome(Approved)	Baclofen (G-protein coupled gaba receptor activity);Progabide (G-protein coupled gaba receptor activity);Vigabatrin (G-protein coupled gaba receptor activity);SGS742 (G-protein coupled gaba receptor activity);Arbaclofen (G-protein coupled gaba receptor activity);Arbaclofen Placarbil (G-protein coupled gaba receptor activity)		(M5932)HALLMARK INFLAMMATORY RESPONSE	0.0	0.0	0.0	0.0	0.0	0.0	0.0	0.0	0.0	0.0	0.0	0.0	0.0	0.0	0.0	0.0	0.0	0.0	0.0	0.0
LILRB5	10990	symbol	H. sapiens	10990	H. sapiens	LILRB5	leukocyte immunoglobulin like receptor B5	GO:0002250 adaptive immune response;GO:0006955 immune response;GO:0006952 defense response		CD markers					0.0	0.0	1.0	0.0	0.0	1.0	0.0	0.0	0.0	0.0	0.0	0.0	0.0	0.0	0.0	0.0	0.0	0.0	0.0	1.0
SESN3	143686	symbol	H. sapiens	143686	H. sapiens	SESN3	sestrin 3	GO:0046626 regulation of insulin receptor signaling pathway;GO:1904262 negative regulation of TORC1 signaling;GO:1900076 regulation of cellular response to insulin stimulus			Cytosol;Nucleoplasm(Approved)				0.0	0.0	0.0	0.0	0.0	0.0	0.0	0.0	0.0	0.0	0.0	0.0	0.0	0.0	0.0	0.0	0.0	0.0	0.0	0.0
CRTC3	64784	symbol	H. sapiens	64784	H. sapiens	CRTC3	CREB regulated transcription coactivator 3	GO:0043951 negative regulation of cAMP-mediated signaling;GO:0032793 positive regulation of CREB transcription factor activity;GO:0050995 negative regulation of lipid catabolic process			Cytosol;Nucleoplasm(Enhanced)				1.0	0.0	0.0	0.0	0.0	0.0	0.0	0.0	0.0	0.0	0.0	0.0	0.0	0.0	0.0	0.0	1.0	1.0	0.0	0.0
FAM174A	345757	symbol	H. sapiens	345757	H. sapiens	FAM174A	family with sequence similarity 174 member A				Cytosol;Golgi apparatus(Approved)				0.0	0.0	0.0	0.0	0.0	0.0	0.0	0.0	0.0	0.0	0.0	0.0	0.0	0.0	0.0	0.0	0.0	0.0	0.0	0.0
NEBL	10529	symbol	H. sapiens	10529	H. sapiens	NEBL	nebulette	GO:0071691 cardiac muscle thin filament assembly;GO:0055003 cardiac myofibril assembly;GO:0055013 cardiac muscle cell development							0.0	0.0	0.0	0.0	0.0	0.0	0.0	0.0	0.0	0.0	0.0	0.0	0.0	0.0	0.0	0.0	0.0	0.0	0.0	0.0
PRF1	5551	symbol	H. sapiens	5551	H. sapiens	PRF1	perforin 1	GO:0051712 positive regulation of killing of cells of other organism;GO:0002357 defense response to tumor cell;GO:0051709 regulation of killing of cells of other organism		Transporters/Transporter channels and pores	Cytosol(Approved)		(M7997)SA CASPASE CASCADE; (M234)PID IL2 STAT5 PATHWAY; (M290)PID IL12 STAT4 PATHWAY	(M5902)HALLMARK APOPTOSIS; (M5950)HALLMARK ALLOGRAFT REJECTION	0.0	1.0	0.0	0.0	0.0	0.0	0.0	0.0	0.0	0.0	1.0	0.0	0.0	0.0	0.0	0.0	0.0	1.0	0.0	0.0
FAM78A	286336	symbol	H. sapiens	286336	H. sapiens	FAM78A	family with sequence similarity 78 member A				Nucleus;Vesicles(Uncertain)				0.0	0.0	0.0	0.0	0.0	0.0	0.0	0.0	0.0	0.0	0.0	0.0	0.0	0.0	0.0	0.0	0.0	0.0	0.0	0.0
TEX261	113419	symbol	H. sapiens	113419	H. sapiens	TEX261	testis expressed 261	GO:0006888 ER to Golgi vesicle-mediated transport;GO:0048193 Golgi vesicle transport;GO:0046907 intracellular transport			Cytosol;Nucleoplasm(Approved)				0.0	0.0	0.0	0.0	0.0	0.0	0.0	0.0	0.0	0.0	0.0	0.0	0.0	0.0	0.0	0.0	0.0	0.0	0.0	0.0
MYNN	55892	symbol	H. sapiens	55892	H. sapiens	MYNN	myoneurin	GO:1990830 cellular response to leukemia inhibitory factor;GO:1990823 response to leukemia inhibitory factor;GO:0071345 cellular response to cytokine stimulus		Transcription factors/Zinc-coordinating DNA-binding domains	Nucleus(Supported)				0.0	0.0	0.0	0.0	0.0	0.0	0.0	0.0	0.0	0.0	0.0	0.0	0.0	0.0	0.0	0.0	0.0	0.0	0.0	0.0
HDAC3	8841	symbol	H. sapiens	8841	H. sapiens	HDAC3	histone deacetylase 3	GO:0042993 positive regulation of transcription factor import into nucleus;GO:0010832 negative regulation of myotube differentiation;GO:0046329 negative regulation of JNK cascade		Enzymes/ENZYME proteins/Hydrolases	Golgi apparatus;Nucleoplasm(Supported)	Vorinostat (Transcription factor binding);SB939 (Transcription factor binding);MGCD-0103 (Transcription factor binding)	(M207)PID RETINOIC ACID PATHWAY; (M30)PID HDAC CLASSII PATHWAY; (M254)PID MYC REPRESS PATHWAY	(M5939)HALLMARK P53 PATHWAY	0.0	0.0	0.0	0.0	0.0	0.0	0.0	1.0	0.0	0.0	0.0	0.0	0.0	0.0	0.0	0.0	0.0	0.0	0.0	0.0
NOSIP	51070	symbol	H. sapiens	51070	H. sapiens	NOSIP	nitric oxide synthase interacting protein	GO:0051001 negative regulation of nitric-oxide synthase activity;GO:0032769 negative regulation of monooxygenase activity;GO:0050999 regulation of nitric-oxide synthase activity		Enzymes/ENZYME proteins/Transferases	Nucleus(Enhanced)				0.0	0.0	1.0	0.0	0.0	0.0	0.0	0.0	0.0	0.0	0.0	0.0	0.0	0.0	0.0	0.0	0.0	0.0	0.0	0.0
MED1	5469	symbol	H. sapiens	5469	H. sapiens	MED1	mediator complex subunit 1	GO:0060750 epithelial cell proliferation involved in mammary gland duct elongation;GO:0070562 regulation of vitamin D receptor signaling pathway;GO:2000347 positive regulation of hepatocyte proliferation			Nucleoplasm(Supported)	5-{2-[1-(1-METHYL-PROPYL)-7A-METHYL-OCTAHYDRO-INDEN-4-YLIDENE]-ETHYLIDENE}-2-METHYLENE-CYCLOHEXANE-1,3-DIOL (Vitamin d receptor binding)	(M162)PID RXR VDR PATHWAY; (M58)PID AR PATHWAY; (M200)PID ERA GENOMIC PATHWAY		0.0	1.0	1.0	1.0	0.0	0.0	1.0	0.0	0.0	1.0	0.0	0.0	0.0	0.0	1.0	0.0	0.0	0.0	0.0	0.0
C11orf68	83638	symbol	H. sapiens	83638	H. sapiens	C11orf68	chromosome 11 open reading frame 68				Nucleoli;Nucleus(Approved)				0.0	0.0	0.0	0.0	0.0	0.0	0.0	0.0	0.0	0.0	0.0	0.0	0.0	0.0	0.0	0.0	0.0	0.0	0.0	0.0
C1orf27	54953	gene_synonym	H. sapiens	54953	H. sapiens	ODR4	odr-4 GPCR localization factor homolog				Nucleoplasm;Plasma membrane(Approved)				0.0	0.0	0.0	0.0	0.0	0.0	0.0	0.0	0.0	0.0	0.0	0.0	0.0	0.0	0.0	0.0	0.0	0.0	0.0	0.0
EXOC1	55763	symbol	H. sapiens	55763	H. sapiens	EXOC1	exocyst complex component 1	GO:0051601 exocyst localization;GO:0006893 Golgi to plasma membrane transport;GO:0050714 positive regulation of protein secretion		Transporters/Transporter channels and pores	Cytosol;Microtubules;Plasma membrane(Approved)		(M16)PID INSULIN PATHWAY; (M67)PID ARF6 TRAFFICKING PATHWAY		0.0	0.0	0.0	0.0	0.0	0.0	0.0	0.0	0.0	0.0	0.0	0.0	0.0	0.0	0.0	0.0	1.0	0.0	0.0	0.0
HPS3	84343	symbol	H. sapiens	84343	H. sapiens	HPS3	HPS3, biogenesis of lysosomal organelles complex 2 subunit 1	GO:0043473 pigmentation;GO:0006996 organelle organization;GO:0016043 cellular component organization			Golgi apparatus;Plasma membrane(Approved)				0.0	0.0	0.0	0.0	0.0	0.0	0.0	0.0	0.0	0.0	0.0	0.0	0.0	0.0	0.0	0.0	0.0	0.0	0.0	0.0
OPLAH	26873	symbol	H. sapiens	26873	H. sapiens	OPLAH	5-oxoprolinase, ATP-hydrolysing	GO:0006750 glutathione biosynthetic process;GO:0019184 nonribosomal peptide biosynthetic process;GO:0042398 cellular modified amino acid biosynthetic process		Enzymes/ENZYME proteins/Hydrolases	Nucleoli fibrillar center(Approved)	L-Glutamic Acid (Atp binding)			0.0	0.0	0.0	0.0	0.0	0.0	0.0	0.0	0.0	0.0	0.0	0.0	0.0	0.0	0.0	0.0	0.0	0.0	0.0	0.0
TRIM14	9830	symbol	H. sapiens	9830	H. sapiens	TRIM14	tripartite motif containing 14	GO:0032897 negative regulation of viral transcription;GO:0046782 regulation of viral transcription;GO:0019083 viral transcription			Cytosol;Nucleoplasm(Approved)			(M5911)HALLMARK INTERFERON ALPHA RESPONSE; (M5913)HALLMARK INTERFERON GAMMA RESPONSE	0.0	0.0	0.0	0.0	0.0	0.0	0.0	0.0	0.0	1.0	0.0	0.0	0.0	0.0	0.0	0.0	1.0	0.0	0.0	0.0
CDC25B	994	symbol	H. sapiens	994	H. sapiens	CDC25B	cell division cycle 25B	GO:0007144 female meiosis I;GO:0001556 oocyte maturation;GO:1902751 positive regulation of cell cycle G2/M phase transition		Enzymes/ENZYME proteins/Hydrolases	Mitotic spindle;Vesicles(Supported)	Cysteinesulfonic Acid (Protein tyrosine phosphatase activity)	(M10154)SA G2 AND M PHASES; (M199)PID P38 MK2 PATHWAY; (M242)PID AURORA A PATHWAY	(M5902)HALLMARK APOPTOSIS; (M5925)HALLMARK E2F TARGETS; (M5901)HALLMARK G2M CHECKPOINT	0.0	0.0	0.0	0.0	0.0	0.0	0.0	0.0	0.0	0.0	0.0	0.0	1.0	0.0	0.0	0.0	0.0	0.0	0.0	0.0
CMTM7	112616	symbol	H. sapiens	112616	H. sapiens	CMTM7	CKLF like MARVEL transmembrane domain containing 7	GO:0002337 B-1a B cell differentiation;GO:0001923 B-1 B cell differentiation;GO:0002335 mature B cell differentiation		Transporters/Transporter channels and pores	Plasma membrane(Approved)				0.0	1.0	0.0	0.0	0.0	0.0	0.0	0.0	0.0	0.0	0.0	0.0	0.0	0.0	0.0	0.0	0.0	0.0	0.0	0.0
KRCC1	51315	symbol	H. sapiens	51315	H. sapiens	KRCC1	lysine rich coiled-coil 1	GO:0072332 intrinsic apoptotic signaling pathway by p53 class mediator;GO:0097193 intrinsic apoptotic signaling pathway;GO:0072331 signal transduction by p53 class mediator			Cytosol;Nucleoli(Approved)				0.0	0.0	0.0	0.0	0.0	0.0	0.0	0.0	0.0	0.0	0.0	0.0	0.0	0.0	0.0	0.0	0.0	0.0	0.0	0.0
NLRX1	79671	symbol	H. sapiens	79671	H. sapiens	NLRX1	NLR family member X1	GO:0039536 negative regulation of RIG-I signaling pathway;GO:0039532 negative regulation of viral-induced cytoplasmic pattern recognition receptor signaling pathway;GO:0039535 regulation of RIG-I signaling pathway			Mitochondria(Supported)Cell Junctions;Plasma membrane(Approved)				0.0	0.0	0.0	1.0	1.0	0.0	1.0	0.0	0.0	0.0	0.0	0.0	0.0	0.0	0.0	0.0	1.0	0.0	0.0	1.0
RPL5	6125	symbol	H. sapiens	6125	H. sapiens	RPL5	ribosomal protein L5	GO:1904667 negative regulation of ubiquitin protein ligase activity;GO:2000435 negative regulation of protein neddylation;GO:2000434 regulation of protein neddylation		Ribosomal proteins	Cytosol;Endoplasmic reticulum;Nucleoli(Supported)		(M261)PID P53 REGULATION PATHWAY		0.0	0.0	1.0	0.0	0.0	0.0	0.0	0.0	0.0	0.0	0.0	0.0	0.0	0.0	0.0	0.0	1.0	0.0	0.0	0.0
RHOU	58480	symbol	H. sapiens	58480	H. sapiens	RHOU	ras homolog family member U	GO:1903955 positive regulation of protein targeting to mitochondrion;GO:1903214 regulation of protein targeting to mitochondrion;GO:1903749 positive regulation of establishment of protein localization to mitochondrion					(M5493)WNT SIGNALING		0.0	0.0	0.0	0.0	0.0	0.0	0.0	0.0	0.0	1.0	0.0	0.0	1.0	0.0	0.0	0.0	0.0	0.0	0.0	0.0
LMO4	8543	symbol	H. sapiens	8543	H. sapiens	LMO4	LIM domain only 4	GO:0001843 neural tube closure;GO:0021527 spinal cord association neuron differentiation;GO:0021514 ventral spinal cord interneuron differentiation			Nucleoplasm(Supported)Midbody ring(Approved)		(M183)PID IL6 7 PATHWAY; (M100)PID SHP2 PATHWAY; (M200)PID ERA GENOMIC PATHWAY		0.0	1.0	0.0	0.0	0.0	0.0	0.0	0.0	0.0	0.0	0.0	0.0	0.0	0.0	0.0	0.0	0.0	0.0	0.0	0.0
C1GALT1C1	29071	symbol	H. sapiens	29071	H. sapiens	C1GALT1C1	C1GALT1 specific chaperone 1	GO:0016267 O-glycan processing, core 1;GO:0036344 platelet morphogenesis;GO:0016266 O-glycan processing			Cytosol(Approved)				0.0	0.0	0.0	0.0	0.0	0.0	0.0	0.0	0.0	0.0	0.0	0.0	0.0	0.0	0.0	0.0	0.0	0.0	0.0	0.0
CYB5R1	51706	symbol	H. sapiens	51706	H. sapiens	CYB5R1	cytochrome b5 reductase 1	GO:1903955 positive regulation of protein targeting to mitochondrion;GO:1903214 regulation of protein targeting to mitochondrion;GO:1903749 positive regulation of establishment of protein localization to mitochondrion		Enzymes/ENZYME proteins/Oxidoreductases	Cytosol;Mitochondria;Nucleoli(Uncertain)	Flavin adenine dinucleotide (Cytochrome-b5 reductase activity, acting on nad(p)h)		(M5941)HALLMARK UV RESPONSE UP	1.0	0.0	0.0	0.0	0.0	0.0	0.0	0.0	0.0	0.0	0.0	0.0	0.0	0.0	0.0	0.0	0.0	0.0	0.0	0.0
OBFC1	79991	gene_synonym	H. sapiens	79991	H. sapiens	STN1	STN1, CST complex subunit	GO:0032211 negative regulation of telomere maintenance via telomerase;GO:1904357 negative regulation of telomere maintenance via telomere lengthening;GO:0032210 regulation of telomere maintenance via telomerase			Nucleus(Supported)				0.0	0.0	0.0	0.0	0.0	0.0	0.0	0.0	0.0	0.0	0.0	0.0	0.0	0.0	0.0	0.0	0.0	0.0	0.0	0.0
TRIP6	7205	symbol	H. sapiens	7205	H. sapiens	TRIP6	thyroid hormone receptor interactor 6	GO:0008588 release of cytoplasmic sequestered NF-kappaB;GO:0007253 cytoplasmic sequestering of NF-kappaB;GO:0042347 negative regulation of NF-kappaB import into nucleus			Cytosol;Focal adhesion sites(Supported)Plasma membrane(Approved)		(M15)PID LYSOPHOSPHOLIPID PATHWAY; (M167)PID AP1 PATHWAY		0.0	0.0	0.0	0.0	0.0	0.0	0.0	0.0	0.0	0.0	0.0	0.0	0.0	0.0	0.0	0.0	0.0	0.0	0.0	0.0
LPCAT4	254531	symbol	H. sapiens	254531	H. sapiens	LPCAT4	lysophosphatidylcholine acyltransferase 4	GO:0036148 phosphatidylglycerol acyl-chain remodeling;GO:0036150 phosphatidylserine acyl-chain remodeling;GO:0036152 phosphatidylethanolamine acyl-chain remodeling		Enzymes/ENZYME proteins/Transferases					0.0	0.0	0.0	0.0	0.0	0.0	0.0	0.0	0.0	0.0	0.0	0.0	0.0	0.0	0.0	0.0	0.0	0.0	0.0	0.0
TCF7	6932	symbol	H. sapiens	6932	H. sapiens	TCF7	transcription factor 7	GO:0033153 T cell receptor V(D)J recombination;GO:0002681 somatic recombination of T cell receptor gene segments;GO:0002568 somatic diversification of T cell receptor genes		Transcription factors/Other all-alpha-helical DNA-binding domains	Nucleoplasm(Enhanced)		(M223)PID BETA CATENIN NUC PATHWAY; (M5493)WNT SIGNALING	(M5895)HALLMARK WNT BETA CATENIN SIGNALING	0.0	1.0	0.0	0.0	0.0	0.0	0.0	0.0	0.0	0.0	0.0	0.0	0.0	0.0	0.0	1.0	0.0	0.0	0.0	0.0
OTX1	5013	symbol	H. sapiens	5013	H. sapiens	OTX1	orthodenticle homeobox 1	GO:0048852 diencephalon morphogenesis;GO:0048853 forebrain morphogenesis;GO:0048854 brain morphogenesis		Transcription factors/Helix-turn-helix domains	Cytosol;Nuclear speckles(Uncertain)				0.0	0.0	0.0	0.0	0.0	0.0	0.0	0.0	0.0	0.0	0.0	0.0	0.0	0.0	0.0	0.0	0.0	0.0	0.0	0.0
SPINT1	6692	symbol	H. sapiens	6692	H. sapiens	SPINT1	serine peptidase inhibitor, Kunitz type 1	GO:0060670 branching involved in labyrinthine layer morphogenesis;GO:0060713 labyrinthine layer morphogenesis;GO:0001843 neural tube closure			Cytosol;Plasma membrane(Supported)Nucleoplasm(Approved)				0.0	0.0	0.0	0.0	0.0	0.0	0.0	0.0	1.0	0.0	0.0	1.0	0.0	0.0	0.0	0.0	0.0	0.0	0.0	0.0
KIZ	55857	symbol	H. sapiens	55857	H. sapiens	KIZ	kizuna centrosomal protein	GO:0007051 spindle organization;GO:0000226 microtubule cytoskeleton organization;GO:0007017 microtubule-based process					(M129)PID PLK1 PATHWAY		0.0	0.0	0.0	0.0	0.0	0.0	0.0	0.0	0.0	0.0	0.0	0.0	0.0	0.0	0.0	0.0	0.0	0.0	0.0	0.0
IL2RB	3560	symbol	H. sapiens	3560	H. sapiens	IL2RB	interleukin 2 receptor subunit beta	GO:0038110 interleukin-2-mediated signaling pathway;GO:0035723 interleukin-15-mediated signaling pathway;GO:0071350 cellular response to interleukin-15		CD markers		Denileukin diftitox (Interleukin-2 receptor activity);Aldesleukin (Interleukin-2 receptor activity);Basiliximab (Interleukin-2 receptor activity);Daclizumab (Interleukin-2 receptor activity)	(M234)PID IL2 STAT5 PATHWAY; (M143)PID IL2 PI3K PATHWAY; (M122)PID IL2 1PATHWAY	(M5916)HALLMARK APICAL SURFACE; (M5913)HALLMARK INTERFERON GAMMA RESPONSE; (M5932)HALLMARK INFLAMMATORY RESPONSE	0.0	0.0	0.0	0.0	0.0	0.0	0.0	0.0	0.0	1.0	1.0	1.0	0.0	0.0	0.0	0.0	1.0	0.0	0.0	0.0
PELO	53918	symbol	H. sapiens	53918	H. sapiens	PELO	pelota mRNA surveillance and ribosome rescue factor	GO:0070966 nuclear-transcribed mRNA catabolic process, no-go decay;GO:0070651 nonfunctional rRNA decay;GO:0070481 nuclear-transcribed mRNA catabolic process, non-stop decay			Nucleoli fibrillar center(Approved)				0.0	0.0	0.0	0.0	0.0	0.0	0.0	0.0	0.0	0.0	0.0	0.0	0.0	0.0	0.0	0.0	0.0	0.0	0.0	0.0
LGALS9C	654346	symbol	H. sapiens	654346	H. sapiens	LGALS9C	galectin 9C				Cytosol(Approved)		(M5880)NABA ECM AFFILIATED; (M5885)NABA MATRISOME ASSOCIATED; (M5889)NABA MATRISOME		0.0	0.0	0.0	0.0	0.0	0.0	0.0	0.0	0.0	0.0	0.0	0.0	0.0	0.0	0.0	0.0	0.0	0.0	0.0	0.0
ZNF692	55657	symbol	H. sapiens	55657	H. sapiens	ZNF692	zinc finger protein 692	GO:0000122 negative regulation of transcription by RNA polymerase II;GO:0045892 negative regulation of transcription, DNA-templated;GO:1903507 negative regulation of nucleic acid-templated transcription		Transcription factors/Zinc-coordinating DNA-binding domains	Nucleoli;Nucleus(Enhanced)				0.0	0.0	0.0	0.0	0.0	0.0	0.0	0.0	0.0	0.0	0.0	0.0	0.0	0.0	0.0	0.0	0.0	0.0	0.0	0.0
MED22	6837	symbol	H. sapiens	6837	H. sapiens	MED22	mediator complex subunit 22	GO:0006357 regulation of transcription by RNA polymerase II;GO:0006366 transcription by RNA polymerase II;GO:0006355 regulation of transcription, DNA-templated			Nucleoplasm(Approved)				0.0	0.0	0.0	0.0	0.0	0.0	0.0	0.0	0.0	0.0	0.0	0.0	0.0	0.0	0.0	0.0	0.0	0.0	0.0	0.0
EPHB6	2051	symbol	H. sapiens	2051	H. sapiens	EPHB6	EPH receptor B6	GO:0048013 ephrin receptor signaling pathway;GO:0007169 transmembrane receptor protein tyrosine kinase signaling pathway;GO:0007167 enzyme linked receptor protein signaling pathway	Tyr protein kinase family		Nuclear speckles(Approved)				0.0	0.0	0.0	0.0	0.0	0.0	0.0	0.0	0.0	0.0	0.0	0.0	0.0	0.0	0.0	0.0	0.0	0.0	0.0	0.0
SMN1	6606	symbol	H. sapiens	6606	H. sapiens	SMN1	survival of motor neuron 1, telomeric	GO:0000387 spliceosomal snRNP assembly;GO:0000245 spliceosomal complex assembly;GO:0006353 DNA-templated transcription, termination							0.0	0.0	0.0	0.0	0.0	0.0	0.0	0.0	0.0	0.0	0.0	0.0	0.0	0.0	0.0	0.0	0.0	0.0	0.0	0.0
GALK1	2584	symbol	H. sapiens	2584	H. sapiens	GALK1	galactokinase 1	GO:0061623 glycolytic process from galactose;GO:0061622 glycolytic process through glucose-1-phosphate;GO:0061620 glycolytic process through glucose-6-phosphate		Enzymes/ENZYME proteins/Transferases	Cytosol;Golgi apparatus(Approved)	Phosphoaminophosphonic Acid-Adenylate Ester (Galactose binding)		(M5937)HALLMARK GLYCOLYSIS; (M5891)HALLMARK HYPOXIA	0.0	0.0	0.0	0.0	0.0	0.0	0.0	0.0	0.0	0.0	0.0	0.0	0.0	0.0	0.0	0.0	0.0	0.0	0.0	0.0
NKX3-1	4824	symbol	H. sapiens	4824	H. sapiens	NKX3-1	NK3 homeobox 1	GO:2000836 positive regulation of androgen secretion;GO:2000834 regulation of androgen secretion;GO:0035935 androgen secretion		Transcription factors/Helix-turn-helix domains			(M285)PID HNF3A PATHWAY; (M58)PID AR PATHWAY	(M5908)HALLMARK ANDROGEN RESPONSE	0.0	0.0	0.0	0.0	0.0	0.0	0.0	0.0	1.0	0.0	0.0	0.0	0.0	0.0	0.0	0.0	0.0	0.0	0.0	0.0
ANKRD52	283373	symbol	H. sapiens	283373	H. sapiens	ANKRD52	ankyrin repeat domain 52				Mitochondria;Nucleoplasm(Approved)				0.0	0.0	0.0	0.0	0.0	0.0	0.0	0.0	0.0	0.0	0.0	0.0	0.0	0.0	0.0	0.0	0.0	0.0	0.0	0.0
ARHGEF3	50650	symbol	H. sapiens	50650	H. sapiens	ARHGEF3	Rho guanine nucleotide exchange factor 3	GO:0035023 regulation of Rho protein signal transduction;GO:0007266 Rho protein signal transduction;GO:0046578 regulation of Ras protein signal transduction			Cytosol(Approved)		(M68)PID RHOA REG PATHWAY	(M5893)HALLMARK MITOTIC SPINDLE	0.0	0.0	0.0	0.0	0.0	0.0	0.0	0.0	1.0	0.0	0.0	0.0	1.0	0.0	0.0	0.0	0.0	0.0	0.0	0.0
RNF20	56254	symbol	H. sapiens	56254	H. sapiens	RNF20	ring finger protein 20	GO:2001168 positive regulation of histone H2B ubiquitination;GO:0033184 positive regulation of histone ubiquitination;GO:2001166 regulation of histone H2B ubiquitination		Enzymes/ENZYME proteins/Transferases	Nucleoplasm(Enhanced)				0.0	0.0	1.0	0.0	0.0	0.0	0.0	1.0	0.0	0.0	0.0	0.0	0.0	0.0	0.0	0.0	0.0	0.0	0.0	0.0
RPL10A	4736	symbol	H. sapiens	4736	H. sapiens	RPL10A	ribosomal protein L10a	GO:0006614 SRP-dependent cotranslational protein targeting to membrane;GO:0006613 cotranslational protein targeting to membrane;GO:0000184 nuclear-transcribed mRNA catabolic process, nonsense-mediated decay		Ribosomal proteins	Cytosol;Endoplasmic reticulum;Nucleoli(Supported)				0.0	0.0	0.0	0.0	0.0	0.0	0.0	0.0	0.0	0.0	0.0	0.0	0.0	0.0	0.0	0.0	1.0	0.0	0.0	0.0
STK16	8576	symbol	H. sapiens	8576	H. sapiens	STK16	serine/threonine kinase 16	GO:0071560 cellular response to transforming growth factor beta stimulus;GO:0071559 response to transforming growth factor beta;GO:0018108 peptidyl-tyrosine phosphorylation	Other	Enzymes/{ENZYME proteins/Transferases,Kinases}	Cytosol(Approved)				0.0	0.0	0.0	0.0	0.0	0.0	0.0	0.0	0.0	0.0	0.0	0.0	0.0	0.0	0.0	0.0	0.0	0.0	0.0	0.0
ZNF18	7566	symbol	H. sapiens	7566	H. sapiens	ZNF18	zinc finger protein 18	GO:0006357 regulation of transcription by RNA polymerase II;GO:0006366 transcription by RNA polymerase II;GO:0006355 regulation of transcription, DNA-templated		Transcription factors/Zinc-coordinating DNA-binding domains	Cytosol;Golgi apparatus;Nucleoplasm;Plasma membrane(Approved)				0.0	0.0	0.0	0.0	0.0	0.0	0.0	0.0	0.0	0.0	0.0	0.0	0.0	0.0	0.0	0.0	0.0	0.0	0.0	0.0
RPL18A	6142	symbol	H. sapiens	6142	H. sapiens	RPL18A	ribosomal protein L18a	GO:0006614 SRP-dependent cotranslational protein targeting to membrane;GO:0006613 cotranslational protein targeting to membrane;GO:0000184 nuclear-transcribed mRNA catabolic process, nonsense-mediated decay		Ribosomal proteins	Cytosol;Nucleoli(Approved)				0.0	0.0	0.0	0.0	0.0	0.0	0.0	0.0	0.0	0.0	0.0	0.0	0.0	0.0	0.0	0.0	1.0	0.0	0.0	0.0
SMARCE1	6605	symbol	H. sapiens	6605	H. sapiens	SMARCE1	SWI/SNF related, matrix associated, actin dependent regulator of chromatin, subfamily e, member 1	GO:0006337 nucleosome disassembly;GO:0031498 chromatin disassembly;GO:0032986 protein-DNA complex disassembly		Transcription factors/Other all-alpha-helical DNA-binding domains	Nucleoplasm(Supported)		(M119)PID ERB GENOMIC PATHWAY; (M151)PID AR TF PATHWAY		0.0	0.0	0.0	0.0	0.0	0.0	0.0	1.0	0.0	0.0	0.0	0.0	0.0	0.0	0.0	0.0	0.0	0.0	0.0	0.0
SDHC	6391	symbol	H. sapiens	6391	H. sapiens	SDHC	succinate dehydrogenase complex subunit C	GO:0006121 mitochondrial electron transport, succinate to ubiquinone;GO:0042775 mitochondrial ATP synthesis coupled electron transport;GO:0042773 ATP synthesis coupled electron transport		Citric acid cycle related proteins		Succinic acid (Succinate dehydrogenase activity);2-Hexyloxy-6-Hydroxymethyl-Tetrahydro-Pyran-3,4,5-Triol (Succinate dehydrogenase activity);UBIQUINONE-1 (Succinate dehydrogenase activity)		(M5935)HALLMARK FATTY ACID METABOLISM; (M5905)HALLMARK ADIPOGENESIS; (M5936)HALLMARK OXIDATIVE PHOSPHORYLATION	0.0	0.0	0.0	0.0	0.0	0.0	0.0	0.0	0.0	0.0	0.0	0.0	0.0	0.0	0.0	0.0	0.0	0.0	0.0	0.0
SLC46A3	283537	symbol	H. sapiens	283537	H. sapiens	SLC46A3	solute carrier family 46 member 3	GO:0055085 transmembrane transport;GO:0006810 transport;GO:0051234 establishment of localization		Transporters/Electrochemical Potential-driven transporters	Actin filaments;Cytosol;Plasma membrane(Approved)			(M5934)HALLMARK XENOBIOTIC METABOLISM	0.0	0.0	0.0	0.0	0.0	0.0	0.0	0.0	0.0	0.0	0.0	0.0	0.0	0.0	0.0	0.0	0.0	0.0	0.0	0.0
TNFRSF10D	8793	symbol	H. sapiens	8793	H. sapiens	TNFRSF10D	TNF receptor superfamily member 10d	GO:0043154 negative regulation of cysteine-type endopeptidase activity involved in apoptotic process;GO:2000117 negative regulation of cysteine-type endopeptidase activity;GO:0033209 tumor necrosis factor-mediated signaling pathway		CD markers	Actin filaments;Plasma membrane(Approved)		(M79)PID TRAIL PATHWAY; (M145)PID P53 DOWNSTREAM PATHWAY		0.0	0.0	0.0	1.0	0.0	0.0	0.0	0.0	1.0	1.0	0.0	0.0	0.0	0.0	0.0	0.0	0.0	0.0	0.0	0.0
PPL	5493	symbol	H. sapiens	5493	H. sapiens	PPL	periplakin	GO:0070268 cornification;GO:0031424 keratinization;GO:0030216 keratinocyte differentiation			Plasma membrane(Supported)Cytosol;Nucleoplasm(Approved)				0.0	0.0	1.0	0.0	0.0	0.0	0.0	0.0	0.0	0.0	0.0	0.0	0.0	0.0	0.0	0.0	0.0	0.0	0.0	0.0
C14orf93	60686	symbol	H. sapiens	60686	H. sapiens	C14orf93	chromosome 14 open reading frame 93				Nucleus;Plasma membrane(Approved)				0.0	0.0	0.0	0.0	0.0	0.0	0.0	0.0	0.0	0.0	0.0	0.0	0.0	0.0	0.0	0.0	0.0	0.0	0.0	0.0
TNFAIP8L2	79626	symbol	H. sapiens	79626	H. sapiens	TNFAIP8L2	TNF alpha induced protein 8 like 2	GO:0050868 negative regulation of T cell activation;GO:1903038 negative regulation of leukocyte cell-cell adhesion;GO:0051250 negative regulation of lymphocyte activation			Vesicles(Uncertain)				0.0	1.0	0.0	1.0	1.0	0.0	0.0	0.0	0.0	0.0	0.0	0.0	0.0	0.0	0.0	0.0	0.0	0.0	0.0	0.0
LIN37	55957	symbol	H. sapiens	55957	H. sapiens	LIN37	lin-37 DREAM MuvB core complex component	GO:0051726 regulation of cell cycle;GO:0007049 cell cycle;GO:0050794 regulation of cellular process			Nucleoplasm(Supported)				0.0	0.0	0.0	0.0	0.0	0.0	0.0	0.0	0.0	0.0	0.0	0.0	1.0	0.0	0.0	0.0	0.0	0.0	0.0	0.0
COPS7A	50813	symbol	H. sapiens	50813	H. sapiens	COPS7A	COP9 signalosome subunit 7A	GO:0000715 nucleotide-excision repair, DNA damage recognition;GO:0006283 transcription-coupled nucleotide-excision repair;GO:0000338 protein deneddylation			Nucleoplasm(Supported)				0.0	0.0	0.0	0.0	0.0	0.0	0.0	0.0	0.0	0.0	0.0	0.0	0.0	0.0	0.0	0.0	0.0	0.0	0.0	0.0
ZNF362	149076	symbol	H. sapiens	149076	H. sapiens	ZNF362	zinc finger protein 362	GO:0006355 regulation of transcription, DNA-templated;GO:1903506 regulation of nucleic acid-templated transcription;GO:0006351 transcription, DNA-templated		Transcription factors/Zinc-coordinating DNA-binding domains	Nucleoli;Nucleus(Approved)				0.0	0.0	0.0	0.0	0.0	0.0	0.0	0.0	0.0	0.0	0.0	0.0	0.0	0.0	0.0	0.0	0.0	0.0	0.0	0.0
CNIH4	29097	symbol	H. sapiens	29097	H. sapiens	CNIH4	cornichon family AMPA receptor auxiliary protein 4	GO:0006888 ER to Golgi vesicle-mediated transport;GO:0048193 Golgi vesicle transport;GO:0015031 protein transport							0.0	0.0	0.0	0.0	0.0	0.0	0.0	0.0	0.0	0.0	0.0	0.0	0.0	0.0	0.0	0.0	0.0	0.0	0.0	0.0
TIA1	7072	symbol	H. sapiens	7072	H. sapiens	TIA1	TIA1 cytotoxic granule associated RNA binding protein	GO:1903608 protein localization to cytoplasmic stress granule;GO:1904037 positive regulation of epithelial cell apoptotic process;GO:0042036 negative regulation of cytokine biosynthetic process			Cytosol;Nucleoplasm(Supported)				0.0	0.0	0.0	1.0	0.0	0.0	0.0	0.0	1.0	0.0	0.0	0.0	0.0	0.0	0.0	0.0	0.0	0.0	0.0	0.0
SEMA7A	8482	symbol	H. sapiens	8482	H. sapiens	SEMA7A	semaphorin 7A (John Milton Hagen blood group)	GO:0060907 positive regulation of macrophage cytokine production;GO:0045773 positive regulation of axon extension;GO:0061081 positive regulation of myeloid leukocyte cytokine production involved in immune response		Blood group antigen proteins;CD markers	Vesicles(Uncertain)		(M5880)NABA ECM AFFILIATED; (M5885)NABA MATRISOME ASSOCIATED; (M5889)NABA MATRISOME		0.0	0.0	0.0	1.0	0.0	0.0	1.0	0.0	0.0	0.0	0.0	0.0	0.0	0.0	0.0	0.0	0.0	0.0	0.0	1.0
CISH	1154	symbol	H. sapiens	1154	H. sapiens	CISH	cytokine inducible SH2 containing protein	GO:0046627 negative regulation of insulin receptor signaling pathway;GO:0038111 interleukin-7-mediated signaling pathway;GO:1900077 negative regulation of cellular response to insulin stimulus			Cytokinetic bridge;Microtubules(Approved)		(M5248)ST JAK STAT PATHWAY; (M4170)ST INTERFERON GAMMA PATHWAY; (M9174)ST STAT3 PATHWAY	(M5947)HALLMARK IL2 STAT5 SIGNALING; (M5907)HALLMARK ESTROGEN RESPONSE LATE; (M5906)HALLMARK ESTROGEN RESPONSE EARLY	0.0	0.0	1.0	0.0	0.0	0.0	0.0	0.0	0.0	1.0	0.0	0.0	0.0	0.0	0.0	0.0	0.0	0.0	0.0	0.0
CHD9	80205	symbol	H. sapiens	80205	H. sapiens	CHD9	chromodomain helicase DNA binding protein 9	GO:0019216 regulation of lipid metabolic process;GO:0016569 covalent chromatin modification;GO:0006325 chromatin organization		Enzymes/ENZYME proteins/Hydrolases	Cytosol;Plasma membrane(Approved)				0.0	0.0	0.0	0.0	0.0	0.0	0.0	1.0	0.0	0.0	0.0	0.0	0.0	0.0	0.0	0.0	0.0	0.0	0.0	0.0
NDUFB3	4709	symbol	H. sapiens	4709	H. sapiens	NDUFB3	NADH:ubiquinone oxidoreductase subunit B3	GO:0006120 mitochondrial electron transport, NADH to ubiquinone;GO:0042775 mitochondrial ATP synthesis coupled electron transport;GO:0042773 ATP synthesis coupled electron transport				NADH (Nadh dehydrogenase (ubiquinone) activity)		(M5936)HALLMARK OXIDATIVE PHOSPHORYLATION	0.0	0.0	0.0	0.0	0.0	0.0	0.0	0.0	0.0	0.0	0.0	0.0	0.0	0.0	0.0	0.0	0.0	0.0	0.0	0.0
PGGT1B	5229	symbol	H. sapiens	5229	H. sapiens	PGGT1B	protein geranylgeranyltransferase type I subunit beta	GO:0051771 negative regulation of nitric-oxide synthase biosynthetic process;GO:0018344 protein geranylgeranylation;GO:0051769 regulation of nitric-oxide synthase biosynthetic process		Enzymes/ENZYME proteins/Transferases	Cytosol;Endoplasmic reticulum;Nucleoplasm(Approved)	4-[(5-{[4-(3-CHLOROPHENYL)-3-OXOPIPERAZIN-1-YL]METHYL}-1H-IMIDAZOL-1-YL)METHYL]BENZONITRILE (Zinc ion binding);GERANYLGERANYL DIPHOSPHATE (Zinc ion binding);2-[METHYL-(5-GERANYL-4-METHYL-PENT-3-ENYL)-AMINO]-ETHYL-DIPHOSPHATE (Zinc ion binding)			0.0	0.0	0.0	0.0	0.0	0.0	0.0	0.0	0.0	0.0	0.0	0.0	0.0	0.0	0.0	0.0	0.0	0.0	0.0	0.0
ELMOD2	255520	symbol	H. sapiens	255520	H. sapiens	ELMOD2	ELMO domain containing 2	GO:0050688 regulation of defense response to virus;GO:0051607 defense response to virus;GO:0002831 regulation of response to biotic stimulus			Cytosol;Nucleoli;Nucleus(Approved)				0.0	0.0	0.0	1.0	0.0	0.0	0.0	0.0	1.0	0.0	0.0	0.0	0.0	0.0	0.0	0.0	0.0	0.0	0.0	1.0
DOK4	55715	symbol	H. sapiens	55715	H. sapiens	DOK4	docking protein 4	GO:0007411 axon guidance;GO:0097485 neuron projection guidance;GO:0007409 axonogenesis			Cytokinetic bridge;Microtubules;Vesicles(Approved)		(M82)PID RET PATHWAY		0.0	0.0	0.0	0.0	0.0	0.0	0.0	0.0	0.0	0.0	0.0	0.0	0.0	0.0	0.0	0.0	0.0	0.0	0.0	0.0
VPS72	6944	symbol	H. sapiens	6944	H. sapiens	VPS72	vacuolar protein sorting 72 homolog	GO:0043486 histone exchange;GO:0035019 somatic stem cell population maintenance;GO:0043044 ATP-dependent chromatin remodeling			Nuclear speckles(Supported)				0.0	0.0	0.0	0.0	0.0	0.0	0.0	1.0	0.0	0.0	0.0	0.0	0.0	0.0	0.0	0.0	0.0	0.0	0.0	0.0
CCDC28A	25901	symbol	H. sapiens	25901	H. sapiens	CCDC28A	coiled-coil domain containing 28A				Cytosol(Approved)			(M5945)HALLMARK HEME METABOLISM	0.0	0.0	0.0	0.0	0.0	0.0	0.0	0.0	0.0	0.0	0.0	0.0	0.0	0.0	0.0	0.0	0.0	0.0	0.0	0.0
PMM2	5373	symbol	H. sapiens	5373	H. sapiens	PMM2	phosphomannomutase 2	GO:0009298 GDP-mannose biosynthetic process;GO:0019673 GDP-mannose metabolic process;GO:0006013 mannose metabolic process		Enzymes/ENZYME proteins/Isomerase	Cytosol;Nucleus(Approved)			(M5937)HALLMARK GLYCOLYSIS	0.0	0.0	0.0	0.0	0.0	0.0	0.0	0.0	0.0	0.0	0.0	0.0	0.0	0.0	0.0	0.0	0.0	0.0	0.0	0.0
PPP1R35	221908	symbol	H. sapiens	221908	H. sapiens	PPP1R35	protein phosphatase 1 regulatory subunit 35	GO:0032515 negative regulation of phosphoprotein phosphatase activity;GO:0035308 negative regulation of protein dephosphorylation;GO:0010923 negative regulation of phosphatase activity			Nucleoplasm(Approved)				0.0	0.0	0.0	0.0	0.0	0.0	0.0	0.0	0.0	0.0	0.0	0.0	0.0	0.0	0.0	0.0	0.0	0.0	0.0	0.0
INO80E	283899	symbol	H. sapiens	283899	H. sapiens	INO80E	INO80 complex subunit E	GO:0016579 protein deubiquitination;GO:0006338 chromatin remodeling;GO:0070646 protein modification by small protein removal			Nucleoli;Nucleoplasm(Supported)				0.0	0.0	0.0	0.0	0.0	0.0	0.0	1.0	0.0	0.0	0.0	0.0	0.0	0.0	0.0	0.0	0.0	0.0	0.0	0.0
GOLPH3L	55204	symbol	H. sapiens	55204	H. sapiens	GOLPH3L	golgi phosphoprotein 3 like	GO:0043001 Golgi to plasma membrane protein transport;GO:0061951 establishment of protein localization to plasma membrane;GO:0006893 Golgi to plasma membrane transport			Cytosol;Nucleoplasm;Plasma membrane(Approved)				0.0	0.0	0.0	0.0	0.0	0.0	0.0	0.0	0.0	0.0	0.0	1.0	0.0	0.0	0.0	0.0	0.0	0.0	0.0	0.0
BATF2	116071	symbol	H. sapiens	116071	H. sapiens	BATF2	basic leucine zipper ATF-like transcription factor 2	GO:0043011 myeloid dendritic cell differentiation;GO:0042832 defense response to protozoan;GO:0097028 dendritic cell differentiation		Transcription factors/Basic domains	Nucleoli(Approved)			(M5911)HALLMARK INTERFERON ALPHA RESPONSE; (M5913)HALLMARK INTERFERON GAMMA RESPONSE	1.0	1.0	0.0	0.0	0.0	0.0	0.0	0.0	0.0	0.0	0.0	0.0	0.0	0.0	1.0	0.0	0.0	0.0	0.0	0.0
LEF1	51176	symbol	H. sapiens	51176	H. sapiens	LEF1	lymphoid enhancer binding factor 1	GO:0045063 T-helper 1 cell differentiation;GO:0033153 T cell receptor V(D)J recombination;GO:0002681 somatic recombination of T cell receptor gene segments		Transcription factors/Other all-alpha-helical DNA-binding domains	Nucleoplasm(Approved)		(M223)PID BETA CATENIN NUC PATHWAY; (M195)PID CMYB PATHWAY; (M5493)WNT SIGNALING	(M5895)HALLMARK WNT BETA CATENIN SIGNALING; (M5902)HALLMARK APOPTOSIS	1.0	1.0	0.0	1.0	0.0	0.0	0.0	1.0	1.0	0.0	0.0	0.0	0.0	0.0	1.0	1.0	1.0	0.0	0.0	1.0
RORA	6095	symbol	H. sapiens	6095	H. sapiens	RORA	RAR related orphan receptor A	GO:0021702 cerebellar Purkinje cell differentiation;GO:0072539 T-helper 17 cell differentiation;GO:0021694 cerebellar Purkinje cell layer formation		Nuclear receptors;Transcription factors/Zinc-coordinating DNA-binding domains		Cholesterol-Sulfate (Zinc ion binding);Cholesterol (Zinc ion binding)	(M255)PID HIF1 TFPATHWAY	(M5891)HALLMARK HYPOXIA; (M5947)HALLMARK IL2 STAT5 SIGNALING	1.0	1.0	0.0	1.0	0.0	0.0	0.0	0.0	0.0	1.0	1.0	0.0	0.0	0.0	0.0	1.0	0.0	0.0	0.0	1.0
SMARCD3	6604	symbol	H. sapiens	6604	H. sapiens	SMARCD3	SWI/SNF related, matrix associated, actin dependent regulator of chromatin, subfamily d, member 3	GO:0003219 cardiac right ventricle formation;GO:0003139 secondary heart field specification;GO:0003211 cardiac ventricle formation			Nucleoplasm(Enhanced)		(M87)PID LKB1 PATHWAY; (M256)PID TAP63 PATHWAY		0.0	0.0	0.0	0.0	0.0	0.0	0.0	1.0	0.0	0.0	0.0	0.0	0.0	0.0	0.0	0.0	0.0	0.0	0.0	0.0
CDK2AP2	10263	symbol	H. sapiens	10263	H. sapiens	CDK2AP2	cyclin dependent kinase 2 associated protein 2	GO:2000035 regulation of stem cell division;GO:2000134 negative regulation of G1/S transition of mitotic cell cycle;GO:1902807 negative regulation of cell cycle G1/S phase transition			Nucleoplasm(Approved)				0.0	0.0	0.0	0.0	0.0	0.0	0.0	0.0	0.0	0.0	0.0	0.0	0.0	0.0	0.0	0.0	0.0	0.0	0.0	0.0
PYGO2	90780	symbol	H. sapiens	90780	H. sapiens	PYGO2	pygopus family PHD finger 2	GO:0007289 spermatid nucleus differentiation;GO:0033599 regulation of mammary gland epithelial cell proliferation;GO:0051569 regulation of histone H3-K4 methylation			Nucleoplasm(Approved)				0.0	0.0	0.0	0.0	0.0	0.0	0.0	1.0	0.0	0.0	0.0	0.0	0.0	0.0	0.0	0.0	0.0	0.0	0.0	0.0
MALSU1	115416	symbol	H. sapiens	115416	H. sapiens	MALSU1	mitochondrial assembly of ribosomal large subunit 1	GO:0070130 negative regulation of mitochondrial translation;GO:0090071 negative regulation of ribosome biogenesis;GO:0070129 regulation of mitochondrial translation			Mitochondria(Enhanced)				0.0	0.0	0.0	0.0	0.0	0.0	0.0	0.0	0.0	0.0	0.0	0.0	0.0	0.0	0.0	0.0	0.0	0.0	0.0	0.0
RPS4X	6191	symbol	H. sapiens	6191	H. sapiens	RPS4X	ribosomal protein S4, X-linked	GO:0006614 SRP-dependent cotranslational protein targeting to membrane;GO:0006613 cotranslational protein targeting to membrane;GO:0000184 nuclear-transcribed mRNA catabolic process, nonsense-mediated decay		Ribosomal proteins			(M16801)SIG REGULATION OF THE ACTIN CYTOSKELETON BY RHO GTPASES; (M5193)SIG CHEMOTAXIS		0.0	0.0	0.0	0.0	0.0	0.0	0.0	0.0	0.0	0.0	0.0	0.0	0.0	0.0	0.0	0.0	1.0	0.0	0.0	0.0
UBL7	84993	symbol	H. sapiens	84993	H. sapiens	UBL7	ubiquitin like 7				Cytosol;Nucleoplasm(Approved)				0.0	0.0	0.0	0.0	0.0	0.0	0.0	0.0	0.0	0.0	0.0	0.0	0.0	0.0	0.0	0.0	0.0	0.0	0.0	0.0
DUSP18	150290	symbol	H. sapiens	150290	H. sapiens	DUSP18	dual specificity phosphatase 18	GO:0000188 inactivation of MAPK activity;GO:0043407 negative regulation of MAP kinase activity;GO:0035970 peptidyl-threonine dephosphorylation		Enzymes/ENZYME proteins/Hydrolases	Nucleoplasm(Supported)				0.0	0.0	0.0	0.0	0.0	0.0	0.0	0.0	0.0	0.0	0.0	0.0	0.0	0.0	0.0	0.0	0.0	0.0	0.0	0.0
AHSA1	10598	symbol	H. sapiens	10598	H. sapiens	AHSA1	activator of HSP90 ATPase activity 1	GO:0032781 positive regulation of ATPase activity;GO:0043462 regulation of ATPase activity;GO:0051345 positive regulation of hydrolase activity			Cytosol(Supported)				0.0	0.0	0.0	0.0	0.0	0.0	0.0	0.0	1.0	0.0	0.0	0.0	0.0	0.0	0.0	0.0	0.0	0.0	0.0	0.0
HEXDC	284004	symbol	H. sapiens	284004	H. sapiens	HEXDC	hexosaminidase D	GO:0005975 carbohydrate metabolic process;GO:0044238 primary metabolic process;GO:0071704 organic substance metabolic process		Enzymes/ENZYME proteins/Hydrolases	Mitochondria;Nucleoli fibrillar center(Approved)				0.0	0.0	0.0	0.0	0.0	0.0	0.0	0.0	0.0	0.0	0.0	0.0	0.0	0.0	0.0	0.0	0.0	0.0	0.0	0.0
BLCAP	10904	symbol	H. sapiens	10904	H. sapiens	BLCAP	bladder cancer associated protein	GO:0030262 apoptotic nuclear changes;GO:0006921 cellular component disassembly involved in execution phase of apoptosis;GO:0097194 execution phase of apoptosis			Nucleoli(Approved)			(M5939)HALLMARK P53 PATHWAY	0.0	0.0	0.0	0.0	0.0	0.0	0.0	0.0	0.0	0.0	0.0	0.0	0.0	0.0	0.0	0.0	0.0	0.0	0.0	0.0
KCTD18	130535	symbol	H. sapiens	130535	H. sapiens	KCTD18	potassium channel tetramerization domain containing 18	GO:0051260 protein homooligomerization;GO:0051259 protein complex oligomerization;GO:0065003 protein-containing complex assembly			Mitochondria(Approved)				0.0	0.0	0.0	0.0	0.0	0.0	0.0	0.0	0.0	0.0	0.0	0.0	0.0	0.0	0.0	0.0	0.0	1.0	0.0	0.0
KIAA0753	9851	symbol	H. sapiens	9851	H. sapiens	KIAA0753	KIAA0753	GO:0071539 protein localization to centrosome;GO:0007099 centriole replication;GO:1905508 protein localization to microtubule organizing center			Centrosome;Cytosol(Enhanced)				0.0	0.0	0.0	0.0	0.0	0.0	0.0	0.0	0.0	0.0	0.0	0.0	0.0	0.0	0.0	0.0	0.0	0.0	0.0	0.0
TMEM87B	84910	symbol	H. sapiens	84910	H. sapiens	TMEM87B	transmembrane protein 87B	GO:0042147 retrograde transport, endosome to Golgi;GO:0016482 cytosolic transport;GO:0016197 endosomal transport			Golgi apparatus;Vesicles(Approved)				0.0	0.0	0.0	0.0	0.0	0.0	0.0	0.0	0.0	0.0	0.0	0.0	0.0	0.0	0.0	0.0	0.0	0.0	0.0	0.0
LCK	3932	symbol	H. sapiens	3932	H. sapiens	LCK	LCK proto-oncogene, Src family tyrosine kinase	GO:0050862 positive regulation of T cell receptor signaling pathway;GO:0050857 positive regulation of antigen receptor-mediated signaling pathway;GO:0051209 release of sequestered calcium ion into cytosol	Tyr protein kinase family	Enzymes/{ENZYME proteins/Transferases,Kinases/Tyr protein kinases}	Golgi apparatus(Approved)	Dasatinib (Sh2 domain binding);{4-[2-Acetylamino-2-(3-Carbamoyl-2-Cyclohexylmethoxy-6,7,8,9-Tetrahydro-5h-Benzocyclohepten-5ylcarbamoyl)-Ethyl]-2-Phosphono-Phenyl}-Phosphonic Acid (Sh2 domain binding);Staurosporine (Sh2 domain binding);1-Tert-Butyl-3-(4-Chloro-Phenyl)-1h-Pyrazolo[3,4-D]Pyrimidin-4-Ylamine (Sh2 domain binding);(4-{2-Acetylamino-2-[1-(3-Carbamoyl-4-Cyclohexylmethoxy-Phenyl)-Ethylca…	(M26)PID NFKAPPAB ATYPICAL PATHWAY; (M33)PID GLYPICAN 1PATHWAY; (M257)PID EPHRINB REV PATHWAY	(M5923)HALLMARK PI3K AKT MTOR SIGNALING; (M5948)HALLMARK BILE ACID METABOLISM; (M5950)HALLMARK ALLOGRAFT REJECTION	0.0	1.0	1.0	0.0	0.0	0.0	1.0	0.0	1.0	1.0	1.0	0.0	0.0	0.0	0.0	0.0	1.0	0.0	0.0	0.0
LRRC37B	114659	symbol	H. sapiens	114659	H. sapiens	LRRC37B	leucine rich repeat containing 37B				Cytosol(Approved)				0.0	0.0	0.0	0.0	0.0	0.0	0.0	0.0	0.0	0.0	0.0	0.0	0.0	0.0	0.0	0.0	0.0	0.0	0.0	0.0
CD2	914	symbol	H. sapiens	914	H. sapiens	CD2	CD2 molecule	GO:0030887 positive regulation of myeloid dendritic cell activation;GO:1902715 positive regulation of interferon-gamma secretion;GO:2000484 positive regulation of interleukin-8 secretion		CD markers		Alefacept (Receptor binding)		(M5902)HALLMARK APOPTOSIS; (M5950)HALLMARK ALLOGRAFT REJECTION	1.0	1.0	0.0	1.0	0.0	0.0	0.0	0.0	0.0	0.0	0.0	0.0	0.0	1.0	0.0	0.0	0.0	0.0	1.0	0.0
ARG1	383	symbol	H. sapiens	383	H. sapiens	ARG1	arginase 1	GO:0070965 positive regulation of neutrophil mediated killing of fungus;GO:0070953 regulation of neutrophil mediated killing of fungus;GO:0070961 positive regulation of neutrophil mediated killing of symbiont cell		Enzymes/ENZYME proteins/Hydrolases		L-Ornithine (Manganese ion binding);2(S)-Amino-6-Boronohexanoic Acid (Manganese ion binding);Nor-N-Omega-Hydroxy-L-Arginine (Manganese ion binding);Dinor-N(Omega)-Hydroxy-L-Arginine (Manganese ion binding);S-{2-[Amino(Dihydroxy)-Lambda~4~-Sulfanyl]Ethyl}-D-Cysteine (Manganese ion binding);N-Omega-Hydroxy-L-Arginine (Manganese ion binding);S-2-(Boronoethyl)-L-Cysteine (Manganese ion binding);Urea …	(M166)PID ATF2 PATHWAY; (M28)PID IL4 2PATHWAY	(M5953)HALLMARK KRAS SIGNALING UP; (M5934)HALLMARK XENOBIOTIC METABOLISM	1.0	1.0	0.0	1.0	1.0	0.0	0.0	0.0	0.0	1.0	0.0	0.0	0.0	0.0	0.0	1.0	0.0	1.0	0.0	1.0
ETV7	51513	symbol	H. sapiens	51513	H. sapiens	ETV7	ETS variant 7	GO:0000122 negative regulation of transcription by RNA polymerase II;GO:0045892 negative regulation of transcription, DNA-templated;GO:1903507 negative regulation of nucleic acid-templated transcription		Transcription factors/Helix-turn-helix domains	Nucleoplasm(Enhanced)				0.0	0.0	0.0	0.0	0.0	0.0	0.0	0.0	0.0	0.0	0.0	1.0	0.0	0.0	0.0	0.0	0.0	0.0	0.0	0.0
NSF	4905	symbol	H. sapiens	4905	H. sapiens	NSF	N-ethylmaleimide sensitive factor, vesicle fusing ATPase	GO:0048208 COPII vesicle coating;GO:0035494 SNARE complex disassembly;GO:0048207 vesicle targeting, rough ER to cis-Golgi		Enzymes/ENZYME proteins/Hydrolases;Transporters/Transporter channels and pores	Cytosol(Supported)	1-Ethyl-Pyrrolidine-2,5-Dione (Syntaxin-1 binding)			0.0	0.0	0.0	0.0	0.0	0.0	0.0	0.0	0.0	0.0	0.0	0.0	0.0	0.0	0.0	0.0	0.0	0.0	0.0	0.0
FAM175B	23172	gene_synonym	H. sapiens	23172	H. sapiens	ABRAXAS2	abraxas 2, BRISC complex subunit	GO:0070536 protein K63-linked deubiquitination;GO:0090307 mitotic spindle assembly;GO:0008608 attachment of spindle microtubules to kinetochore			Cytosol(Supported)				0.0	0.0	0.0	0.0	0.0	0.0	0.0	0.0	0.0	0.0	0.0	0.0	0.0	0.0	0.0	0.0	0.0	0.0	0.0	0.0
RNF181	51255	symbol	H. sapiens	51255	H. sapiens	RNF181	ring finger protein 181	GO:0051865 protein autoubiquitination;GO:0043161 proteasome-mediated ubiquitin-dependent protein catabolic process;GO:0000209 protein polyubiquitination		Enzymes/ENZYME proteins/Transferases	Cytosol;Nucleoplasm(Approved)				0.0	0.0	1.0	0.0	0.0	0.0	0.0	0.0	0.0	0.0	0.0	0.0	0.0	0.0	0.0	0.0	0.0	0.0	0.0	0.0
EFEMP2	30008	symbol	H. sapiens	30008	H. sapiens	EFEMP2	EGF containing fibulin extracellular matrix protein 2	GO:0048251 elastic fiber assembly;GO:0085029 extracellular matrix assembly;GO:0030198 extracellular matrix organization					(M3008)NABA ECM GLYCOPROTEINS; (M5884)NABA CORE MATRISOME; (M5889)NABA MATRISOME	(M5930)HALLMARK EPITHELIAL MESENCHYMAL TRANSITION	0.0	0.0	0.0	0.0	0.0	0.0	0.0	0.0	0.0	0.0	0.0	0.0	0.0	0.0	0.0	0.0	0.0	0.0	0.0	0.0
KIAA0319	9856	symbol	H. sapiens	9856	H. sapiens	KIAA0319	KIAA0319	GO:2000171 negative regulation of dendrite development;GO:0001764 neuron migration;GO:0050773 regulation of dendrite development			Vesicles(Uncertain)				0.0	0.0	0.0	0.0	0.0	0.0	0.0	0.0	0.0	0.0	0.0	0.0	0.0	0.0	0.0	0.0	0.0	0.0	0.0	0.0
ST6GAL1	6480	symbol	H. sapiens	6480	H. sapiens	ST6GAL1	ST6 beta-galactoside alpha-2,6-sialyltransferase 1	GO:0006054 N-acetylneuraminate metabolic process;GO:0016266 O-glycan processing;GO:0018279 protein N-linked glycosylation via asparagine		Enzymes/ENZYME proteins/Transferases				(M5953)HALLMARK KRAS SIGNALING UP	0.0	0.0	0.0	0.0	0.0	0.0	0.0	0.0	0.0	0.0	0.0	0.0	0.0	0.0	0.0	0.0	0.0	0.0	0.0	0.0
C5orf15	56951	symbol	H. sapiens	56951	H. sapiens	C5orf15	chromosome 5 open reading frame 15				Golgi apparatus(Approved)				0.0	0.0	0.0	0.0	0.0	0.0	0.0	0.0	0.0	0.0	0.0	0.0	0.0	0.0	0.0	0.0	0.0	0.0	0.0	0.0
ITK	3702	symbol	H. sapiens	3702	H. sapiens	ITK	IL2 inducible T cell kinase	GO:0001865 NK T cell differentiation;GO:0007202 activation of phospholipase C activity;GO:0010863 positive regulation of phospholipase C activity	Tyr protein kinase family	Enzymes/{ENZYME proteins/Transferases,Kinases/Tyr protein kinases}		Staurosporine (Non-membrane spanning protein tyrosine kinase activity);Pazopanib (Non-membrane spanning protein tyrosine kinase activity)	(M9526)ST T CELL SIGNAL TRANSDUCTION; (M141)PID PI3KCI PATHWAY; (M7)PID FCER1 PATHWAY	(M5950)HALLMARK ALLOGRAFT REJECTION	0.0	1.0	1.0	1.0	0.0	0.0	1.0	0.0	1.0	0.0	1.0	0.0	0.0	1.0	0.0	1.0	0.0	0.0	0.0	1.0
STAU2	27067	symbol	H. sapiens	27067	H. sapiens	STAU2	staufen double-stranded RNA binding protein 2				Cytosol;Nucleoplasm(Supported)				0.0	0.0	0.0	0.0	0.0	0.0	0.0	0.0	0.0	0.0	0.0	0.0	0.0	0.0	0.0	0.0	0.0	0.0	0.0	0.0
MTIF3	219402	symbol	H. sapiens	219402	H. sapiens	MTIF3	mitochondrial translational initiation factor 3	GO:0070124 mitochondrial translational initiation;GO:0032790 ribosome disassembly;GO:0032988 ribonucleoprotein complex disassembly			Mitochondria;Nucleoplasm(Supported)				0.0	0.0	0.0	0.0	0.0	0.0	0.0	0.0	0.0	0.0	0.0	0.0	0.0	0.0	0.0	0.0	0.0	0.0	0.0	0.0
PPP3CB	5532	symbol	H. sapiens	5532	H. sapiens	PPP3CB	protein phosphatase 3 catalytic subunit beta	GO:0001915 negative regulation of T cell mediated cytotoxicity;GO:0035774 positive regulation of insulin secretion involved in cellular response to glucose stimulus;GO:0002710 negative regulation of T cell mediated immunity		Enzymes/ENZYME proteins/Hydrolases	Mitochondria(Approved)		(M235)PID TCR CALCIUM PATHWAY; (M290)PID IL12 STAT4 PATHWAY; (M175)PID ERBB2 ERBB3 PATHWAY		1.0	1.0	1.0	0.0	1.0	0.0	1.0	0.0	0.0	0.0	1.0	0.0	0.0	0.0	0.0	0.0	0.0	0.0	0.0	1.0
PDE4D	5144	symbol	H. sapiens	5144	H. sapiens	PDE4D	phosphodiesterase 4D	GO:0086024 adenylate cyclase-activating adrenergic receptor signaling pathway involved in positive regulation of heart rate;GO:0010880 regulation of release of sequestered calcium ion into cytosol by sarcoplasmic reticulum;GO:0060314 regulation of ryanodine-sensitive calcium-release channel activity		Enzymes/ENZYME proteins/Hydrolases	Cytosol;Nuclear membrane;Plasma membrane(Approved)	Adenosine monophosphate (Ubiquitin protein ligase binding);Dyphylline (Ubiquitin protein ligase binding);Ketotifen (Ubiquitin protein ligase binding);Iloprost (Ubiquitin protein ligase binding);Roflumilast (Ubiquitin protein ligase binding);Piclamilast (Ubiquitin protein ligase binding);Rolipram (Ubiquitin protein ligase binding);3,5-Dimethyl-1-(3-Nitrophenyl)-1h-Pyrazole-4-Carboxylic Acid Ethyl …			0.0	0.0	0.0	1.0	0.0	0.0	1.0	0.0	0.0	0.0	0.0	0.0	0.0	1.0	0.0	0.0	0.0	0.0	0.0	0.0
DCAF6	55827	symbol	H. sapiens	55827	H. sapiens	DCAF6	DDB1 and CUL4 associated factor 6	GO:0043687 post-translational protein modification;GO:0045944 positive regulation of transcription by RNA polymerase II;GO:0016567 protein ubiquitination			Nucleus(Supported)Focal adhesion sites(Approved)				0.0	0.0	1.0	0.0	0.0	0.0	0.0	0.0	0.0	0.0	0.0	0.0	0.0	0.0	0.0	0.0	0.0	0.0	0.0	0.0
TTLL12	23170	symbol	H. sapiens	23170	H. sapiens	TTLL12	tubulin tyrosine ligase like 12	GO:0006464 cellular protein modification process;GO:0036211 protein modification process;GO:0043412 macromolecule modification			Cytosol;Plasma membrane(Approved)				0.0	0.0	0.0	0.0	0.0	0.0	0.0	0.0	0.0	0.0	0.0	0.0	0.0	0.0	0.0	0.0	0.0	0.0	0.0	0.0
KLHDC3	116138	symbol	H. sapiens	116138	H. sapiens	KLHDC3	kelch domain containing 3	GO:0036498 IRE1-mediated unfolded protein response;GO:0007131 reciprocal meiotic recombination;GO:0030968 endoplasmic reticulum unfolded protein response			Nucleoplasm(Supported)			(M5941)HALLMARK UV RESPONSE UP	0.0	0.0	0.0	0.0	0.0	0.0	0.0	0.0	0.0	0.0	0.0	0.0	0.0	0.0	0.0	0.0	0.0	0.0	0.0	0.0
SLF2	55719	symbol	H. sapiens	55719	H. sapiens	SLF2	SMC5-SMC6 complex localization factor 2	GO:0034184 positive regulation of maintenance of mitotic sister chromatid cohesion;GO:0034093 positive regulation of maintenance of sister chromatid cohesion;GO:0034182 regulation of maintenance of mitotic sister chromatid cohesion			Nucleus(Supported)Vesicles(Approved)				0.0	0.0	0.0	0.0	0.0	0.0	0.0	0.0	0.0	0.0	0.0	0.0	0.0	0.0	0.0	0.0	0.0	0.0	0.0	0.0
GDPD3	79153	symbol	H. sapiens	79153	H. sapiens	GDPD3	glycerophosphodiester phosphodiesterase domain containing 3	GO:0034638 phosphatidylcholine catabolic process;GO:0046475 glycerophospholipid catabolic process;GO:0009395 phospholipid catabolic process			Cytokinetic bridge;Cytosol;Nucleoplasm(Approved)				0.0	0.0	0.0	0.0	0.0	0.0	0.0	0.0	0.0	0.0	0.0	0.0	0.0	0.0	0.0	0.0	0.0	0.0	0.0	0.0
METTL4	64863	symbol	H. sapiens	64863	H. sapiens	METTL4	methyltransferase like 4	GO:0032775 DNA methylation on adenine;GO:0006306 DNA methylation;GO:0006305 DNA alkylation			Mitochondria(Approved)				0.0	0.0	0.0	0.0	0.0	0.0	0.0	0.0	0.0	0.0	0.0	0.0	0.0	0.0	0.0	0.0	0.0	0.0	0.0	0.0
FEZ2	9637	symbol	H. sapiens	9637	H. sapiens	FEZ2	fasciculation and elongation protein zeta 2	GO:1902902 negative regulation of autophagosome assembly;GO:0016242 negative regulation of macroautophagy;GO:2000785 regulation of autophagosome assembly			Cytosol;Golgi apparatus;Nucleoli(Approved)				0.0	0.0	0.0	0.0	0.0	0.0	0.0	0.0	0.0	0.0	0.0	0.0	0.0	0.0	0.0	0.0	0.0	0.0	0.0	0.0
SLC39A13	91252	symbol	H. sapiens	91252	H. sapiens	SLC39A13	solute carrier family 39 member 13	GO:0006882 cellular zinc ion homeostasis;GO:0071577 zinc II ion transmembrane transport;GO:0055069 zinc ion homeostasis		Transporters/Electrochemical Potential-driven transporters	Cytosol(Uncertain)				0.0	0.0	0.0	0.0	0.0	0.0	0.0	0.0	0.0	0.0	0.0	0.0	0.0	0.0	0.0	0.0	0.0	0.0	0.0	0.0
RANBP6	26953	symbol	H. sapiens	26953	H. sapiens	RANBP6	RAN binding protein 6	GO:0006610 ribosomal protein import into nucleus;GO:0006607 NLS-bearing protein import into nucleus;GO:0000060 protein import into nucleus, translocation			Vesicles(Supported)				0.0	0.0	0.0	0.0	0.0	0.0	0.0	0.0	0.0	0.0	0.0	0.0	0.0	0.0	0.0	0.0	0.0	0.0	0.0	0.0
GSKIP	51527	symbol	H. sapiens	51527	H. sapiens	GSKIP	GSK3B interacting protein	GO:0008631 intrinsic apoptotic signaling pathway in response to oxidative stress;GO:0090263 positive regulation of canonical Wnt signaling pathway;GO:0006469 negative regulation of protein kinase activity			Golgi apparatus;Nucleoli;Vesicles(Approved)				0.0	0.0	0.0	0.0	0.0	0.0	0.0	0.0	0.0	0.0	0.0	0.0	0.0	0.0	0.0	0.0	0.0	0.0	0.0	0.0
BTBD10	84280	symbol	H. sapiens	84280	H. sapiens	BTBD10	BTB domain containing 10	GO:0044342 type B pancreatic cell proliferation;GO:1901215 negative regulation of neuron death;GO:1901214 regulation of neuron death			Nucleoli fibrillar center;Nucleus(Supported)				0.0	0.0	0.0	0.0	0.0	0.0	0.0	0.0	0.0	0.0	0.0	0.0	0.0	0.0	0.0	0.0	0.0	0.0	0.0	0.0
CHPT1	56994	symbol	H. sapiens	56994	H. sapiens	CHPT1	choline phosphotransferase 1	GO:0006663 platelet activating factor biosynthetic process;GO:0006657 CDP-choline pathway;GO:0046469 platelet activating factor metabolic process		Enzymes/ENZYME proteins/Transferases	Vesicles(Approved)			(M5907)HALLMARK ESTROGEN RESPONSE LATE; (M5906)HALLMARK ESTROGEN RESPONSE EARLY	0.0	0.0	0.0	0.0	0.0	0.0	0.0	0.0	0.0	0.0	0.0	0.0	0.0	0.0	0.0	0.0	0.0	0.0	0.0	0.0
ITGA1	3672	symbol	H. sapiens	3672	H. sapiens	ITGA1	integrin subunit alpha 1	GO:0032516 positive regulation of phosphoprotein phosphatase activity;GO:0042311 vasodilation;GO:0042059 negative regulation of epidermal growth factor receptor signaling pathway		CD markers;Transporters/Accessory Factors Involved in Transport			(M11)PID PRL SIGNALING EVENTS PATHWAY; (M274)PID LYMPH ANGIOGENESIS PATHWAY; (M47)PID INTEGRIN CS PATHWAY		0.0	0.0	0.0	0.0	0.0	0.0	0.0	0.0	1.0	0.0	0.0	0.0	0.0	0.0	0.0	0.0	0.0	0.0	1.0	0.0
MUS81	80198	symbol	H. sapiens	80198	H. sapiens	MUS81	MUS81 structure-specific endonuclease subunit	GO:0072429 response to intra-S DNA damage checkpoint signaling;GO:0072423 response to DNA damage checkpoint signaling;GO:0007095 mitotic G2 DNA damage checkpoint			Nucleoli fibrillar center(Supported)Nucleus(Approved)				0.0	0.0	0.0	0.0	0.0	0.0	0.0	0.0	0.0	0.0	0.0	0.0	0.0	0.0	0.0	0.0	0.0	0.0	0.0	0.0
UNC119B	84747	symbol	H. sapiens	84747	H. sapiens	UNC119B	unc-119 lipid binding chaperone B	GO:0042953 lipoprotein transport;GO:0044872 lipoprotein localization;GO:0060271 cilium assembly							0.0	0.0	0.0	0.0	0.0	0.0	0.0	0.0	0.0	0.0	0.0	0.0	0.0	0.0	0.0	0.0	0.0	0.0	0.0	0.0
CNTRL	11064	symbol	H. sapiens	11064	H. sapiens	CNTRL	centriolin	GO:0097711 ciliary basal body-plasma membrane docking;GO:0010389 regulation of G2/M transition of mitotic cell cycle;GO:1902749 regulation of cell cycle G2/M phase transition			Centrosome(Supported)Cytosol(Approved)			(M5893)HALLMARK MITOTIC SPINDLE	0.0	0.0	0.0	0.0	0.0	0.0	0.0	0.0	0.0	0.0	0.0	0.0	1.0	0.0	0.0	0.0	0.0	0.0	0.0	0.0
P2RY14	9934	symbol	H. sapiens	9934	H. sapiens	P2RY14	purinergic receptor P2Y14	GO:0035589 G-protein coupled purinergic nucleotide receptor signaling pathway;GO:0035590 purinergic nucleotide receptor signaling pathway;GO:0035588 G-protein coupled purinergic receptor signaling pathway		G-protein coupled receptors/{Adenosine and adenine nucleotide receptors,GPCRs excl olfactory receptors}				(M5913)HALLMARK INTERFERON GAMMA RESPONSE	0.0	0.0	0.0	0.0	0.0	0.0	0.0	0.0	0.0	0.0	0.0	0.0	0.0	0.0	0.0	0.0	0.0	0.0	0.0	0.0
PAGR1	79447	symbol	H. sapiens	79447	H. sapiens	PAGR1	PAXIP1 associated glutamate rich protein 1	GO:0033148 positive regulation of intracellular estrogen receptor signaling pathway;GO:0033145 positive regulation of intracellular steroid hormone receptor signaling pathway;GO:0033146 regulation of intracellular estrogen receptor signaling pathway							0.0	0.0	0.0	0.0	0.0	0.0	0.0	0.0	0.0	0.0	0.0	0.0	0.0	0.0	0.0	0.0	0.0	0.0	0.0	0.0
CASP8AP2	9994	symbol	H. sapiens	9994	H. sapiens	CASP8AP2	caspase 8 associated protein 2	GO:0006919 activation of cysteine-type endopeptidase activity involved in apoptotic process;GO:0036337 Fas signaling pathway;GO:0043280 positive regulation of cysteine-type endopeptidase activity involved in apoptotic process			Nuclear bodies;Nucleoli(Approved)		(M13096)SA PROGRAMMED CELL DEATH; (M8873)ST FAS SIGNALING PATHWAY	(M5901)HALLMARK G2M CHECKPOINT	0.0	0.0	0.0	0.0	0.0	0.0	0.0	0.0	1.0	0.0	0.0	0.0	0.0	0.0	0.0	0.0	0.0	0.0	0.0	0.0
CD8A	925	symbol	H. sapiens	925	H. sapiens	CD8A	CD8a molecule	GO:0045065 cytotoxic T cell differentiation;GO:0002456 T cell mediated immunity;GO:0030217 T cell differentiation		CD markers			(M88)PID CD8 TCR PATHWAY; (M54)PID IL12 2PATHWAY; (M272)PID CD8 TCR DOWNSTREAM PATHWAY	(M5950)HALLMARK ALLOGRAFT REJECTION	0.0	1.0	1.0	0.0	0.0	1.0	0.0	0.0	0.0	0.0	1.0	0.0	0.0	0.0	0.0	0.0	0.0	0.0	1.0	1.0
BCL11B	64919	symbol	H. sapiens	64919	H. sapiens	BCL11B	B cell CLL/lymphoma 11B	GO:0033153 T cell receptor V(D)J recombination;GO:0021773 striatal medium spiny neuron differentiation;GO:0071678 olfactory bulb axon guidance		Transcription factors/Zinc-coordinating DNA-binding domains	Nucleoli fibrillar center;Nucleus(Approved)			(M5906)HALLMARK ESTROGEN RESPONSE EARLY	0.0	1.0	0.0	0.0	0.0	0.0	0.0	0.0	0.0	0.0	0.0	0.0	0.0	0.0	0.0	1.0	0.0	0.0	0.0	0.0
ASH2L	9070	symbol	H. sapiens	9070	H. sapiens	ASH2L	ASH2 like histone lysine methyltransferase complex subunit	GO:0045652 regulation of megakaryocyte differentiation;GO:0051568 histone H3-K4 methylation;GO:1904837 beta-catenin-TCF complex assembly			Nucleoplasm;Plasma membrane(Supported)				0.0	1.0	0.0	0.0	0.0	0.0	0.0	1.0	0.0	0.0	0.0	0.0	0.0	0.0	1.0	0.0	0.0	0.0	0.0	0.0
BORCS6	54785	symbol	H. sapiens	54785	H. sapiens	BORCS6	BLOC-1 related complex subunit 6	GO:0032418 lysosome localization;GO:0051640 organelle localization;GO:0051641 cellular localization			Centrosome;Cytosol(Supported)				0.0	0.0	0.0	0.0	0.0	0.0	0.0	0.0	0.0	0.0	0.0	0.0	0.0	0.0	0.0	0.0	0.0	0.0	0.0	0.0
CD96	10225	symbol	H. sapiens	10225	H. sapiens	CD96	CD96 molecule	GO:0002728 negative regulation of natural killer cell cytokine production;GO:0002727 regulation of natural killer cell cytokine production;GO:0002370 natural killer cell cytokine production		CD markers				(M5950)HALLMARK ALLOGRAFT REJECTION	0.0	0.0	1.0	1.0	1.0	1.0	0.0	0.0	0.0	0.0	0.0	0.0	0.0	1.0	0.0	0.0	0.0	0.0	0.0	1.0
OSBPL1A	114876	symbol	H. sapiens	114876	H. sapiens	OSBPL1A	oxysterol binding protein like 1A	GO:0006699 bile acid biosynthetic process;GO:0019886 antigen processing and presentation of exogenous peptide antigen via MHC class II;GO:0008206 bile acid metabolic process			Cytosol(Approved)Nucleoplasm(Uncertain)				0.0	0.0	1.0	0.0	0.0	0.0	0.0	0.0	0.0	0.0	0.0	0.0	0.0	0.0	0.0	0.0	0.0	0.0	0.0	0.0
GALNT14	79623	symbol	H. sapiens	79623	H. sapiens	GALNT14	polypeptide N-acetylgalactosaminyltransferase 14	GO:0016266 O-glycan processing;GO:0006493 protein O-linked glycosylation;GO:0006486 protein glycosylation		Enzymes/ENZYME proteins/Transferases	Golgi apparatus;Nucleus(Approved)				0.0	0.0	0.0	0.0	0.0	0.0	0.0	0.0	0.0	0.0	0.0	0.0	0.0	0.0	0.0	0.0	0.0	0.0	0.0	0.0
HOXA1	3198	symbol	H. sapiens	3198	H. sapiens	HOXA1	homeobox A1	GO:0021599 abducens nerve formation;GO:0060876 semicircular canal formation;GO:0021598 abducens nerve morphogenesis		Transcription factors/Helix-turn-helix domains					0.0	0.0	0.0	0.0	0.0	0.0	0.0	0.0	0.0	0.0	0.0	0.0	0.0	0.0	0.0	0.0	0.0	0.0	0.0	0.0
CNOT6	57472	symbol	H. sapiens	57472	H. sapiens	CNOT6	CCR4-NOT transcription complex subunit 6	GO:0006977 DNA damage response, signal transduction by p53 class mediator resulting in cell cycle arrest;GO:0072431 signal transduction involved in mitotic G1 DNA damage checkpoint;GO:0070966 nuclear-transcribed mRNA catabolic process, no-go decay		Enzymes/ENZYME proteins/Hydrolases	Cytosol(Approved)			(M5922)HALLMARK UNFOLDED PROTEIN RESPONSE	0.0	0.0	0.0	0.0	0.0	0.0	0.0	0.0	0.0	0.0	0.0	0.0	0.0	0.0	0.0	0.0	0.0	0.0	0.0	0.0
ZAP70	7535	symbol	H. sapiens	7535	H. sapiens	ZAP70	zeta chain of T cell receptor associated protein kinase 70	GO:0043366 beta selection;GO:0070489 T cell aggregation;GO:0045060 negative thymic T cell selection	Tyr protein kinase family	Enzymes/{ENZYME proteins/Transferases,Kinases/Tyr protein kinases};RAS pathway related proteins		Staurosporine (Receptor binding)	(M9526)ST T CELL SIGNAL TRANSDUCTION; (M141)PID PI3KCI PATHWAY; (M88)PID CD8 TCR PATHWAY	(M5950)HALLMARK ALLOGRAFT REJECTION	0.0	1.0	1.0	0.0	0.0	0.0	1.0	0.0	0.0	0.0	1.0	0.0	0.0	0.0	0.0	1.0	0.0	0.0	0.0	1.0
KIAA0586	9786	symbol	H. sapiens	9786	H. sapiens	KIAA0586	KIAA0586	GO:0007224 smoothened signaling pathway;GO:0060271 cilium assembly;GO:0044782 cilium organization			Cytosol;Nucleoplasm(Approved)				0.0	0.0	0.0	0.0	0.0	0.0	0.0	0.0	0.0	0.0	0.0	0.0	0.0	0.0	0.0	0.0	0.0	0.0	0.0	0.0
NCK1	4690	symbol	H. sapiens	4690	H. sapiens	NCK1	NCK adaptor protein 1	GO:1903676 positive regulation of cap-dependent translational initiation;GO:1903912 negative regulation of endoplasmic reticulum stress-induced eIF2 alpha phosphorylation;GO:1903674 regulation of cap-dependent translational initiation			Cytosol;Plasma membrane(Enhanced)		(M226)PID VEGFR1 PATHWAY; (M193)PID NEPHRIN NEPH1 PATHWAY; (M108)PID NETRIN PATHWAY	(M5923)HALLMARK PI3K AKT MTOR SIGNALING; (M5950)HALLMARK ALLOGRAFT REJECTION; (M5893)HALLMARK MITOTIC SPINDLE	0.0	1.0	1.0	0.0	0.0	0.0	1.0	0.0	1.0	0.0	1.0	0.0	1.0	0.0	0.0	0.0	0.0	0.0	0.0	0.0
ORMDL2	29095	symbol	H. sapiens	29095	H. sapiens	ORMDL2	ORMDL sphingolipid biosynthesis regulator 2	GO:1900060 negative regulation of ceramide biosynthetic process;GO:0090155 negative regulation of sphingolipid biosynthetic process;GO:2000303 regulation of ceramide biosynthetic process			Endoplasmic reticulum(Supported)				0.0	0.0	0.0	0.0	0.0	0.0	0.0	0.0	0.0	0.0	0.0	0.0	0.0	0.0	0.0	0.0	0.0	0.0	0.0	0.0
ZNF224	7767	symbol	H. sapiens	7767	H. sapiens	ZNF224	zinc finger protein 224	GO:0000122 negative regulation of transcription by RNA polymerase II;GO:0045892 negative regulation of transcription, DNA-templated;GO:1903507 negative regulation of nucleic acid-templated transcription		Transcription factors/Zinc-coordinating DNA-binding domains	Nuclear membrane;Nucleus(Supported)				0.0	0.0	0.0	0.0	0.0	0.0	0.0	0.0	0.0	0.0	0.0	0.0	0.0	0.0	0.0	0.0	0.0	0.0	0.0	0.0
PDP1	54704	symbol	H. sapiens	54704	H. sapiens	PDP1	pyruvate dehyrogenase phosphatase catalytic subunit 1	GO:0010510 regulation of acetyl-CoA biosynthetic process from pyruvate;GO:0050812 regulation of acyl-CoA biosynthetic process;GO:0006086 acetyl-CoA biosynthetic process from pyruvate		Enzymes/ENZYME proteins/Hydrolases	Cytosol;Mitochondria;Nucleoplasm(Supported)			(M5921)HALLMARK COMPLEMENT; (M5936)HALLMARK OXIDATIVE PHOSPHORYLATION	0.0	0.0	0.0	0.0	0.0	0.0	0.0	0.0	0.0	0.0	0.0	0.0	0.0	0.0	0.0	0.0	0.0	0.0	0.0	0.0
WDR44	54521	symbol	H. sapiens	54521	H. sapiens	WDR44	WD repeat domain 44				Golgi apparatus(Supported)				0.0	0.0	0.0	0.0	0.0	0.0	0.0	0.0	0.0	0.0	0.0	0.0	0.0	0.0	0.0	0.0	0.0	0.0	0.0	0.0
ITGB7	3695	symbol	H. sapiens	3695	H. sapiens	ITGB7	integrin subunit beta 7	GO:0003366 cell-matrix adhesion involved in ameboidal cell migration;GO:0046718 viral entry into host cell;GO:0050901 leukocyte tethering or rolling			Cytosol;Plasma membrane(Approved)	R1295 (Virus receptor activity);MLN-02 (Virus receptor activity);Vedolizumab (Virus receptor activity)	(M212)PID INTEGRIN5 PATHWAY; (M47)PID INTEGRIN CS PATHWAY; (M156)PID ECADHERIN NASCENT AJ PATHWAY	(M5913)HALLMARK INTERFERON GAMMA RESPONSE	0.0	1.0	1.0	0.0	0.0	1.0	0.0	0.0	0.0	0.0	0.0	1.0	0.0	0.0	0.0	0.0	1.0	0.0	0.0	0.0
PDIA6	10130	symbol	H. sapiens	10130	H. sapiens	PDIA6	protein disulfide isomerase family A member 6	GO:0036498 IRE1-mediated unfolded protein response;GO:0043277 apoptotic cell clearance;GO:0030968 endoplasmic reticulum unfolded protein response		Enzymes/ENZYME proteins/Isomerase	Endoplasmic reticulum(Supported)Cytosol(Approved)			(M5922)HALLMARK UNFOLDED PROTEIN RESPONSE	0.0	0.0	0.0	0.0	0.0	0.0	0.0	0.0	0.0	0.0	0.0	0.0	0.0	0.0	0.0	0.0	0.0	0.0	0.0	0.0
INSL3	3640	symbol	H. sapiens	3640	H. sapiens	INSL3	insulin like 3	GO:0090303 positive regulation of wound healing;GO:0010634 positive regulation of epithelial cell migration;GO:1903036 positive regulation of response to wounding					(M5883)NABA SECRETED FACTORS; (M5885)NABA MATRISOME ASSOCIATED; (M5889)NABA MATRISOME		0.0	0.0	0.0	0.0	0.0	0.0	0.0	0.0	0.0	0.0	0.0	0.0	0.0	0.0	0.0	0.0	0.0	0.0	0.0	0.0
TC2N	123036	symbol	H. sapiens	123036	H. sapiens	TC2N	tandem C2 domains, nuclear	GO:0048791 calcium ion-regulated exocytosis of neurotransmitter;GO:0016079 synaptic vesicle exocytosis;GO:0017158 regulation of calcium ion-dependent exocytosis			Nuclear bodies;Nucleoplasm(Approved)				1.0	0.0	0.0	0.0	0.0	0.0	0.0	0.0	0.0	0.0	0.0	0.0	0.0	0.0	0.0	0.0	0.0	0.0	0.0	0.0
CCZ1B	221960	symbol	H. sapiens	221960	H. sapiens	CCZ1B	CCZ1 homolog B, vacuolar protein trafficking and biogenesis associated	GO:0016192 vesicle-mediated transport;GO:0006810 transport;GO:0051234 establishment of localization			Vesicles(Enhanced)				0.0	0.0	0.0	0.0	0.0	0.0	0.0	0.0	0.0	0.0	0.0	0.0	0.0	0.0	0.0	0.0	0.0	0.0	0.0	0.0
BAK1	578	symbol	H. sapiens	578	H. sapiens	BAK1	BCL2 antagonist/killer 1	GO:0002352 B cell negative selection;GO:1901030 positive regulation of mitochondrial outer membrane permeabilization involved in apoptotic signaling pathway;GO:0008635 activation of cysteine-type endopeptidase activity involved in apoptotic process by cytochrome c		Transporters/Transporter channels and pores			(M13096)SA PROGRAMMED CELL DEATH; (M8873)ST FAS SIGNALING PATHWAY; (M19)PID P73PATHWAY	(M5897)HALLMARK IL6 JAK STAT3 SIGNALING; (M5941)HALLMARK UV RESPONSE UP; (M5939)HALLMARK P53 PATHWAY	0.0	1.0	0.0	0.0	0.0	0.0	0.0	0.0	1.0	0.0	0.0	0.0	0.0	0.0	0.0	0.0	0.0	0.0	0.0	0.0
CALML4	91860	symbol	H. sapiens	91860	H. sapiens	CALML4	calmodulin like 4			RAS pathway related proteins	Cytosol;Golgi apparatus;Nucleoplasm(Approved)				0.0	0.0	0.0	0.0	0.0	0.0	0.0	0.0	0.0	0.0	0.0	0.0	0.0	0.0	0.0	0.0	0.0	0.0	0.0	0.0
ANXA6	309	symbol	H. sapiens	309	H. sapiens	ANXA6	annexin A6	GO:0051560 mitochondrial calcium ion homeostasis;GO:0006874 cellular calcium ion homeostasis;GO:0006937 regulation of muscle contraction		Transporters/Transporter channels and pores			(M5880)NABA ECM AFFILIATED; (M5885)NABA MATRISOME ASSOCIATED; (M5889)NABA MATRISOME		0.0	0.0	0.0	0.0	0.0	0.0	0.0	0.0	0.0	0.0	0.0	0.0	0.0	0.0	0.0	0.0	0.0	1.0	0.0	0.0
VSIG10	54621	symbol	H. sapiens	54621	H. sapiens	VSIG10	V-set and immunoglobulin domain containing 10				Cytosol;Microtubule organizing center(Approved)				0.0	0.0	0.0	0.0	0.0	0.0	0.0	0.0	0.0	0.0	0.0	0.0	0.0	0.0	0.0	0.0	0.0	0.0	0.0	0.0
ZCCHC7	84186	symbol	H. sapiens	84186	H. sapiens	ZCCHC7	zinc finger CCHC-type containing 7				Cytosol;Nucleoli(Enhanced)				0.0	0.0	0.0	0.0	0.0	0.0	0.0	0.0	0.0	0.0	0.0	0.0	0.0	0.0	0.0	0.0	0.0	0.0	0.0	0.0
NAPB	63908	symbol	H. sapiens	63908	H. sapiens	NAPB	NSF attachment protein beta	GO:0035494 SNARE complex disassembly;GO:0043624 cellular protein complex disassembly;GO:0032984 protein-containing complex disassembly			Cytosol(Uncertain)				0.0	0.0	0.0	0.0	0.0	0.0	0.0	0.0	0.0	0.0	0.0	0.0	0.0	0.0	0.0	0.0	0.0	0.0	0.0	0.0
LRRC8C	84230	symbol	H. sapiens	84230	H. sapiens	LRRC8C	leucine rich repeat containing 8 VRAC subunit C	GO:0045444 fat cell differentiation;GO:0098656 anion transmembrane transport;GO:0006820 anion transport		Transporters/Transporter channels and pores	Golgi apparatus(Approved)			(M5947)HALLMARK IL2 STAT5 SIGNALING	0.0	0.0	0.0	0.0	0.0	0.0	0.0	0.0	0.0	0.0	0.0	0.0	0.0	0.0	0.0	0.0	0.0	0.0	0.0	0.0
GPSM2	29899	symbol	H. sapiens	29899	H. sapiens	GPSM2	G protein signaling modulator 2	GO:1905832 positive regulation of spindle assembly;GO:1904778 positive regulation of protein localization to cell cortex;GO:1904776 regulation of protein localization to cell cortex			Cytosol(Supported)				0.0	0.0	0.0	0.0	0.0	0.0	0.0	0.0	0.0	0.0	0.0	0.0	0.0	0.0	0.0	0.0	0.0	0.0	0.0	0.0
HS2ST1	9653	symbol	H. sapiens	9653	H. sapiens	HS2ST1	heparan sulfate 2-O-sulfotransferase 1	GO:0006024 glycosaminoglycan biosynthetic process;GO:0006023 aminoglycan biosynthetic process;GO:0030203 glycosaminoglycan metabolic process			Mitochondria(Approved)			(M5937)HALLMARK GLYCOLYSIS	0.0	0.0	0.0	0.0	0.0	0.0	0.0	0.0	0.0	0.0	0.0	0.0	0.0	0.0	0.0	0.0	0.0	0.0	0.0	0.0
PIGY	84992	symbol	H. sapiens	84992	H. sapiens	PIGY	phosphatidylinositol glycan anchor biosynthesis class Y	GO:0016254 preassembly of GPI anchor in ER membrane;GO:0006506 GPI anchor biosynthetic process;GO:0006505 GPI anchor metabolic process							0.0	0.0	0.0	0.0	0.0	0.0	0.0	0.0	0.0	0.0	0.0	0.0	0.0	0.0	0.0	0.0	0.0	0.0	0.0	0.0
PARK7	11315	symbol	H. sapiens	11315	H. sapiens	PARK7	Parkinsonism associated deglycase	GO:1903384 negative regulation of hydrogen peroxide-induced neuron intrinsic apoptotic signaling pathway;GO:1902958 positive regulation of mitochondrial electron transport, NADH to ubiquinone;GO:1903383 regulation of hydrogen peroxide-induced neuron intrinsic apoptotic signaling pathway		Enzymes/{ENZYME proteins/Hydrolases,Peptidases/Cysteine-type peptidases}	Cytosol;Nucleus(Supported)		(M275)PID ALPHA SYNUCLEIN PATHWAY		0.0	0.0	1.0	1.0	0.0	0.0	1.0	1.0	1.0	0.0	0.0	0.0	0.0	0.0	0.0	0.0	0.0	0.0	0.0	0.0
PIP4K2B	8396	symbol	H. sapiens	8396	H. sapiens	PIP4K2B	phosphatidylinositol-5-phosphate 4-kinase type 2 beta	GO:2000786 positive regulation of autophagosome assembly;GO:0044090 positive regulation of vacuole organization;GO:2000785 regulation of autophagosome assembly		Enzymes/ENZYME proteins/Transferases	Nucleoplasm(Supported)				0.0	0.0	0.0	0.0	0.0	0.0	0.0	0.0	0.0	0.0	0.0	0.0	0.0	0.0	0.0	0.0	0.0	0.0	0.0	0.0
CSNK2A1	1457	symbol	H. sapiens	1457	H. sapiens	CSNK2A1	casein kinase 2 alpha 1	GO:0043154 negative regulation of cysteine-type endopeptidase activity involved in apoptotic process;GO:0006656 phosphatidylcholine biosynthetic process;GO:0021987 cerebral cortex development	Other	Enzymes/{ENZYME proteins/Transferases,Kinases}	Nucleoplasm(Supported)	(5-Oxo-5,6-Dihydro-Indolo[1,2-a]Quinazolin-7-Yl)-Acetic Acid (Protein serine/threonine kinase activity);1,8-Di-Hydroxy-4-Nitro-Xanthen-9-One (Protein serine/threonine kinase activity);Resveratrol (Protein serine/threonine kinase activity);1,8-Di-Hydroxy-4-Nitro-Anthraquinone (Protein serine/threonine kinase activity);Benzamidine (Protein serine/threonine kinase activity);5,8-Di-Amino-1,4-Dihydrox…	(M42)PID DNA PK PATHWAY; (M26)PID NFKAPPAB ATYPICAL PATHWAY; (M206)PID PDGFRA PATHWAY		0.0	0.0	0.0	0.0	0.0	0.0	0.0	0.0	1.0	0.0	0.0	0.0	1.0	0.0	0.0	0.0	0.0	0.0	0.0	0.0
PTPRCAP	5790	symbol	H. sapiens	5790	H. sapiens	PTPRCAP	protein tyrosine phosphatase, receptor type C associated protein	GO:0006952 defense response;GO:0006950 response to stress;GO:0050896 response to stimulus							0.0	0.0	0.0	0.0	0.0	0.0	0.0	0.0	0.0	0.0	0.0	0.0	0.0	0.0	0.0	0.0	0.0	0.0	0.0	0.0
TRADD	8717	symbol	H. sapiens	8717	H. sapiens	TRADD	TNFRSF1A associated via death domain	GO:0097296 activation of cysteine-type endopeptidase activity involved in apoptotic signaling pathway;GO:2001269 positive regulation of cysteine-type endopeptidase activity involved in apoptotic signaling pathway;GO:0051798 positive regulation of hair follicle development			Cytosol(Approved)		(M79)PID TRAIL PATHWAY; (M18030)ST TUMOR NECROSIS FACTOR PATHWAY; (M197)PID HIV NEF PATHWAY		0.0	0.0	0.0	0.0	0.0	0.0	0.0	0.0	1.0	1.0	0.0	0.0	0.0	0.0	0.0	0.0	0.0	1.0	0.0	0.0
LYL1	4066	symbol	H. sapiens	4066	H. sapiens	LYL1	LYL1, basic helix-loop-helix family member	GO:0001955 blood vessel maturation;GO:0060216 definitive hemopoiesis;GO:0030183 B cell differentiation		Transcription factors/Basic domains	Golgi apparatus(Approved)				0.0	1.0	0.0	0.0	0.0	0.0	0.0	0.0	0.0	0.0	0.0	1.0	0.0	0.0	0.0	0.0	0.0	0.0	0.0	0.0
SYT2	127833	symbol	H. sapiens	127833	H. sapiens	SYT2	synaptotagmin 2	GO:1903861 positive regulation of dendrite extension;GO:1903859 regulation of dendrite extension;GO:0048791 calcium ion-regulated exocytosis of neurotransmitter			Vesicles(Approved)	Botulinum Toxin Type B (Syntaxin binding)			1.0	0.0	0.0	0.0	0.0	0.0	0.0	0.0	0.0	0.0	0.0	0.0	0.0	0.0	0.0	0.0	0.0	0.0	0.0	0.0
APOBEC3G	60489	symbol	H. sapiens	60489	H. sapiens	APOBEC3G	apolipoprotein B mRNA editing enzyme catalytic subunit 3G	GO:0045869 negative regulation of single stranded viral RNA replication via double stranded DNA intermediate;GO:0009972 cytidine deamination;GO:0045091 regulation of single stranded viral RNA replication via double stranded DNA intermediate			Cytosol;Nucleoplasm(Uncertain)			(M5921)HALLMARK COMPLEMENT	0.0	0.0	0.0	1.0	0.0	0.0	0.0	0.0	0.0	0.0	0.0	0.0	0.0	0.0	0.0	0.0	1.0	0.0	0.0	1.0
NANS	54187	symbol	H. sapiens	54187	H. sapiens	NANS	N-acetylneuraminate synthase	GO:0006055 CMP-N-acetylneuraminate biosynthetic process;GO:0046381 CMP-N-acetylneuraminate metabolic process;GO:0009226 nucleotide-sugar biosynthetic process		Enzymes/ENZYME proteins/Transferases	Nucleoplasm(Approved)				0.0	0.0	0.0	0.0	0.0	0.0	0.0	0.0	0.0	0.0	0.0	0.0	0.0	0.0	0.0	0.0	0.0	0.0	0.0	0.0
FYN	2534	symbol	H. sapiens	2534	H. sapiens	FYN	FYN proto-oncogene, Src family tyrosine kinase	GO:1905664 regulation of calcium ion import across plasma membrane;GO:0098703 calcium ion import across plasma membrane;GO:1905430 cellular response to glycine	Tyr protein kinase family	Enzymes/{ENZYME proteins/Transferases,Kinases/Tyr protein kinases}	Cytosol;Plasma membrane(Enhanced)	Dasatinib (Protein tyrosine kinase activity);1-Methoxy-2-[2-(2-Methoxy-Ethoxy]-Ethane (Protein tyrosine kinase activity)	(M251)PID SYNDECAN 3 PATHWAY; (M184)PID ECADHERIN KERATINOCYTE PATHWAY; (M33)PID GLYPICAN 1PATHWAY	(M5946)HALLMARK COAGULATION; (M5942)HALLMARK UV RESPONSE DN; (M5921)HALLMARK COMPLEMENT	0.0	1.0	1.0	1.0	0.0	0.0	1.0	0.0	1.0	1.0	1.0	0.0	0.0	0.0	0.0	0.0	1.0	0.0	0.0	1.0
CXXC1	30827	symbol	H. sapiens	30827	H. sapiens	CXXC1	CXXC finger protein 1	GO:0036498 IRE1-mediated unfolded protein response;GO:0051568 histone H3-K4 methylation;GO:0034968 histone lysine methylation		Transcription factors/Zinc-coordinating DNA-binding domains	Nucleus(Enhanced)			(M5922)HALLMARK UNFOLDED PROTEIN RESPONSE	0.0	0.0	0.0	0.0	0.0	0.0	0.0	1.0	0.0	0.0	0.0	0.0	0.0	0.0	0.0	0.0	0.0	0.0	0.0	0.0
GZMK	3003	symbol	H. sapiens	3003	H. sapiens	GZMK	granzyme K	GO:0006508 proteolysis;GO:0019538 protein metabolic process;GO:1901564 organonitrogen compound metabolic process		Enzymes/Peptidases/Serine-type peptidases				(M5921)HALLMARK COMPLEMENT	0.0	0.0	0.0	0.0	0.0	0.0	0.0	0.0	0.0	0.0	0.0	0.0	0.0	0.0	0.0	0.0	0.0	0.0	0.0	0.0
ARPC5L	81873	symbol	H. sapiens	81873	H. sapiens	ARPC5L	actin related protein 2/3 complex subunit 5 like	GO:0034314 Arp2/3 complex-mediated actin nucleation;GO:0045010 actin nucleation;GO:0030838 positive regulation of actin filament polymerization						(M5924)HALLMARK MTORC1 SIGNALING	0.0	0.0	0.0	0.0	0.0	0.0	0.0	0.0	0.0	0.0	0.0	0.0	0.0	0.0	0.0	0.0	0.0	0.0	0.0	0.0
TMEM265	100862671	symbol	H. sapiens	100862671	H. sapiens	TMEM265	transmembrane protein 265	GO:0009607 response to biotic stimulus;GO:0050896 response to stimulus;GO:0008150 biological_process							0.0	0.0	0.0	0.0	0.0	0.0	0.0	0.0	0.0	0.0	0.0	0.0	0.0	0.0	0.0	0.0	0.0	0.0	0.0	0.0
HIST1H4C	8364	symbol	H. sapiens	8364	H. sapiens	HIST1H4C	histone cluster 1 H4 family member c	GO:0045653 negative regulation of megakaryocyte differentiation;GO:0034080 CENP-A containing nucleosome assembly;GO:0000183 chromatin silencing at rDNA						(M5945)HALLMARK HEME METABOLISM	0.0	1.0	0.0	0.0	1.0	0.0	0.0	1.0	0.0	0.0	0.0	0.0	1.0	0.0	1.0	0.0	0.0	1.0	0.0	0.0
PEX6	5190	symbol	H. sapiens	5190	H. sapiens	PEX6	peroxisomal biogenesis factor 6	GO:0016561 protein import into peroxisome matrix, translocation;GO:0016558 protein import into peroxisome matrix;GO:0006625 protein targeting to peroxisome		Transporters/Primary Active Transporters	Vesicles(Supported)Nuclear bodies;Nucleoplasm(Approved)			(M5949)HALLMARK PEROXISOME; (M5948)HALLMARK BILE ACID METABOLISM	0.0	0.0	0.0	0.0	0.0	0.0	0.0	0.0	0.0	0.0	0.0	0.0	0.0	0.0	0.0	0.0	0.0	0.0	0.0	0.0
UTP6	55813	symbol	H. sapiens	55813	H. sapiens	UTP6	UTP6, small subunit processome component	GO:0000462 maturation of SSU-rRNA from tricistronic rRNA transcript (SSU-rRNA, 5.8S rRNA, LSU-rRNA);GO:0030490 maturation of SSU-rRNA;GO:0042274 ribosomal small subunit biogenesis			Nucleoli(Enhanced)				0.0	0.0	0.0	0.0	0.0	0.0	0.0	0.0	0.0	0.0	0.0	0.0	0.0	0.0	0.0	0.0	0.0	0.0	0.0	0.0
CPTP	80772	symbol	H. sapiens	80772	H. sapiens	CPTP	ceramide-1-phosphate transfer protein	GO:1902389 ceramide 1-phosphate transport;GO:0046836 glycolipid transport;GO:0035627 ceramide transport			Cytosol(Approved)				0.0	0.0	0.0	0.0	0.0	0.0	0.0	0.0	0.0	0.0	0.0	0.0	0.0	0.0	0.0	0.0	0.0	0.0	0.0	0.0
TRIB2	28951	symbol	H. sapiens	28951	H. sapiens	TRIB2	tribbles pseudokinase 2	GO:0045081 negative regulation of interleukin-10 biosynthetic process;GO:0045074 regulation of interleukin-10 biosynthetic process;GO:0042091 interleukin-10 biosynthetic process	CAMK Ser/Thr protein kinase family	Enzymes/Kinases/CAMK Ser/Thr protein kinases	Cytosol;Nucleoplasm(Approved)			(M5953)HALLMARK KRAS SIGNALING UP	0.0	0.0	0.0	1.0	0.0	0.0	0.0	0.0	1.0	0.0	0.0	0.0	0.0	0.0	0.0	0.0	0.0	0.0	0.0	0.0
ABHD12B	145447	symbol	H. sapiens	145447	H. sapiens	ABHD12B	abhydrolase domain containing 12B				Nucleus(Uncertain)				0.0	0.0	0.0	0.0	0.0	0.0	0.0	0.0	0.0	0.0	0.0	0.0	0.0	0.0	0.0	0.0	0.0	0.0	0.0	0.0
[truncated: 1,056 more rows]

## Sheet: Enrichment-upregulated genes
GroupID	Category	Term	Description	LogP	Log(q-value)	InTerm_InList	Genes	Symbols
[truncated: 115 more rows]

## Sheet: Annotation-downregulated genes
Input ID	Gene ID	Type	Tax ID	Homologene Gene ID	Homologene Gene Tax ID	Gene Symbol	Description	Biological Process (GO)	Kinase Class (UniProt)	Protein Function (Protein Atlas)	Subcellular Location (Protein Atlas)	Drug (DrugBank)	Canonical Pathways	Hallmark Gene Sets	GO:0002237 response to molecule of bacter	GO:0006954 inflammatory response	R-HSA-6783783 Interleukin-10 signaling	GO:0001817 regulation of cytokine product	hsa04060 Cytokine-cytokine receptor int	GO:0071396 cellular response to lipid	hsa04064 NF-kappa B signaling pathway	GO:0030155 regulation of cell adhesion	GO:0097190 apoptotic signaling pathway	GO:0030595 leukocyte chemotaxis	GO:0007249 I-kappaB kinase/NF-kappaB sign	GO:0071347 cellular response to interleuk	GO:0043408 regulation of MAPK cascade	GO:0019915 lipid storage	GO:0072358 cardiovascular system developm	hsa05145 Toxoplasmosis	GO:0010035 response to inorganic substanc	GO:0071417 cellular response to organonit	GO:0009611 response to wounding	M18 PID INTEGRIN1 PATHWAY
[truncated: 1,314 more rows]

[truncated: 1 more sheets: Enrichment-downregulated genes]
